# Supplementary material for: Artificial intelligence driven definition of food preference endotypes in UK Biobank volunteers is associated with distinctive health outcomes and blood based metabolomic and proteomic profiles
Source: Springer Nature journal article supplement (doi:10.1186/s12967-024-05663-0), 2024-10-01
Supplement: 12967_2024_5663_MOESM2_ESM.pdf [file 12967_2024_5663_MOESM2_ESM.pdf]

Supplementary information for

Artificial intelligence driven definition of food preference endotypes in UK Biobank volunteers is associated with distinctive health outcomes and blood based metabolomic and proteomic profiles

INDEX

Supplementary Table 1: Study population characteristics of whole UK Biobank cohort and participants with FPQ

Supplementary Table 2: Exploratory Factor Analysis (EFA) results

Supplementary Table 3: Dimension of FPQ items based on Exploratory Factor Analysis

Supplementary Table 4: Actual daily nutrient intake for each food preference groups

Supplementary Table 5: Blood biochemistry and blood count for each food preference groups

Supplementary Table 6: pairwise group tests for metabolomics differential expression for Volcano3D plot

Supplementary Table 7: Limma differential expression for metabolomics data

Supplementary Table 8: Limma differential expression for proteomics data

Supplementary Table 9: Multinomial logistic regression for differentially expressed protein adjusted for age, sex and BMI

Supplementary Table 10: GO Term from Enrichment analysis of differentially expressed protein

Supplementary Table 11: Relative Risk of chronic diseases

Supplementary Table 12: Medical History, medication, and supplement taken for each food preference groups

Supplementary Data 1: UK Biobank Field ID

Supplementary Data 2: List of the 41 chronic conditions included in the definition of multimorbidity and its ICD10 code use for analysis.

Supplementary Table 1. Study population characteristics of whole UK Biobank cohort and participants with FPQ

| <b>Characteristics</b>       | <b>Total UK<br/>Biobank<br/>(n=502,389)</b> | <b>FPQ<br/>(n=182,176)</b> | <b>p-value</b>      |
|------------------------------|---------------------------------------------|----------------------------|---------------------|
| <b>Age (median)</b>          | 58 (50, 63)                                 | 57 (50, 62)                | <0.001 <sup>a</sup> |
| <b>Gender</b>                |                                             |                            | <0.001 <sup>b</sup> |
| Male                         | 273,325 (46%)                               | 78,017 (43%)               |                     |
| Female                       | 273,086 (54%)                               | 103,720 (57%)              |                     |
| <b>Ethnicity</b>             |                                             |                            | <0.001 <sup>b</sup> |
| White                        | 472,612 (95%)                               | 175,906 (97%)              |                     |
| Mixed                        | 2,335 (0.5%)                                | 954 (0.5%)                 |                     |
| Asian or Asian British       | 9,836 (2%)                                  | 5 (0.003%)                 |                     |
| Black or Black British       | 3,543 (0.7%)                                | 1,254 (0.7%)               |                     |
| Chinese                      | 1,573 (0.3%)                                | 420 (0.2%)                 |                     |
| Other ethnic group           | 4,557 (0.9%)                                | 968 (0.5%)                 |                     |
| <b>Body Mass Index (BMI)</b> |                                             |                            | <0.001 <sup>b</sup> |
| Underweight                  | 2,626 (0.5%)                                | 1,023 (0.6%)               |                     |
| Normal                       | 162,371 (33%)                               | 69,943 (38%)               |                     |
| Overweight                   | 212,078 (42%)                               | 75,079 (41%)               |                     |
| Obese                        | 122,229 (24%)                               | 35,692 (20%)               |                     |
| <b>Smoking status</b>        |                                             |                            | <0.001 <sup>b</sup> |
| Current                      | 52,960 (11%)                                | 12,958 (7%)                |                     |
| Previous                     | 173,007 (34%)                               | 63,498 (35%)               |                     |
| Never                        | 273,449 (54%)                               | 105,293 (58%)              |                     |
| <b>IPAQ activity group</b>   |                                             |                            | <0.001 <sup>b</sup> |
| low                          | 76,190 (15%)                                | 28,211 (15%)               |                     |
| moderate                     | 163,992 (33%)                               | 65,885 (36%)               |                     |
| high                         | 162,102 (32%)                               | 59,980 (33%)               |                     |

Note: Data are presented as median (IQR) for continuous data or number (%) for categorical data. The p-value indicates the probability of observing a difference in characteristics between groups by chance. A low p-value (<0.05) suggests that the difference is statistically significant. The p-value is calculated by <sup>a</sup> Wilcoxon rank sum test; <sup>b</sup> Pearson's Chi-squared test.

Supplementary Table 2: Exploratory Factor Analysis (EFA) results

| item             | MR2   | MR5   | MR7   | MR3   | MR4   | MR9   | MR16  | MR12  | MR1   | MR14  | MR11  | MR10  | MR8   | MR15  | MR13  | MR17  | MR18  |
|------------------|-------|-------|-------|-------|-------|-------|-------|-------|-------|-------|-------|-------|-------|-------|-------|-------|-------|
| Add salt to food | 0.03  | 0.01  | 0.03  | -0.03 | -0.01 | -0.01 | 0     | 0.03  | -0.01 | 0.05  | 0     | 0.53  | 0.14  | -0.08 | -0.06 | 0.09  | -0.03 |
| Aniseed          | 0     | 0     | 0.1   | 0.08  | 0.13  | 0.02  | 0.01  | 0.07  | 0.06  | 0.06  | -0.03 | 0.16  | -0.01 | 0.14  | 0     | -0.01 | -0.03 |
| Apple juice      | 0     | 0.03  | 0.13  | 0.11  | -0.07 | -0.04 | 0.03  | -0.02 | 0.05  | 0.06  | 0     | -0.04 | 0.09  | 0.14  | 0.41  | 0.03  | -0.04 |
| Apple            | 0.03  | 0.01  | 0.5   | -0.03 | 0     | 0.03  | -0.02 | 0.01  | -0.06 | -0.04 | 0     | 0.02  | -0.03 | 0.13  | 0.13  | -0.01 | -0.01 |
| Asparagus        | -0.01 | 0.05  | 0.05  | -0.01 | -0.03 | 0.23  | 0.16  | 0.07  | 0.41  | 0.02  | 0.03  | 0.02  | -0.04 | -0.05 | 0.01  | -0.01 | -0.04 |
| Aubergine        | -0.04 | 0     | 0.04  | -0.01 | 0.05  | 0.1   | 0.2   | 0.01  | 0.45  | 0.02  | 0.02  | 0.02  | -0.06 | 0.06  | 0.01  | 0.01  | -0.08 |
| Avocados         | -0.06 | 0.02  | 0.09  | -0.02 | -0.03 | 0     | 0.26  | 0.03  | 0.45  | 0.07  | 0.04  | 0     | -0.05 | 0     | -0.03 | 0.03  | -0.02 |
| Bacon            | 0.73  | 0.01  | -0.02 | 0.04  | -0.02 | -0.02 | -0.02 | 0.02  | -0.07 | 0.01  | 0.06  | 0.1   | 0     | -0.03 | 0.02  | -0.02 | -0.03 |
| Baked/steam fish | -0.01 | 0.78  | 0     | 0     | -0.02 | 0.08  | -0.01 | -0.01 | 0.05  | -0.03 | -0.01 | 0     | -0.01 | 0.06  | -0.03 | 0     | 0.03  |
| Banana           | 0     | 0.01  | 0.36  | 0.04  | 0     | 0.02  | 0.01  | 0.02  | -0.03 | 0.04  | -0.02 | -0.09 | 0.03  | 0.14  | -0.02 | 0.08  | 0.08  |
| BBQ grilled meat | 0.78  | -0.01 | 0.02  | -0.02 | 0.07  | -0.03 | -0.01 | 0.02  | 0.08  | 0     | -0.01 | 0.04  | 0.01  | -0.01 | 0.02  | -0.02 | 0.08  |
| Beef steak       | 0.8   | -0.06 | 0.03  | -0.03 | 0.02  | 0     | -0.02 | 0.09  | 0.04  | -0.03 | -0.02 | 0.01  | 0.01  | -0.05 | 0.01  | 0.06  | 0.02  |
| Beetroot         | -0.04 | 0     | 0.14  | 0.01  | -0.04 | 0.29  | 0.07  | 0.01  | -0.1  | 0.26  | -0.01 | -0.01 | -0.02 | 0.07  | -0.08 | 0     | 0.01  |
| Bell pepper      | 0     | -0.02 | 0.07  | -0.03 | 0.28  | 0.08  | 0.03  | -0.01 | 0.22  | 0.06  | 0.01  | 0.09  | -0.05 | 0.06  | -0.08 | -0.05 | -0.03 |
| Biscuits         | 0.01  | 0.01  | 0.01  | 0.63  | -0.03 | 0     | -0.01 | 0.03  | -0.06 | -0.01 | 0     | 0.06  | 0.01  | 0.03  | 0.03  | -0.01 | 0.05  |
| Bitter foods     | 0.01  | 0.02  | -0.02 | -0.1  | 0.25  | 0.05  | 0.03  | 0.09  | 0.02  | 0     | 0.02  | 0.22  | -0.12 | 0.08  | 0.17  | 0.01  | -0.1  |
| Bitter ale       | 0.03  | 0.04  | -0.1  | -0.07 | 0.09  | -0.01 | 0.08  | 0.51  | -0.11 | -0.09 | -0.03 | -0.02 | 0     | 0.09  | 0.16  | 0.09  | -0.05 |
| Black olives     | -0.01 | -0.01 | 0.01  | 0.01  | 0     | 0     | 0.91  | 0.01  | 0.01  | -0.02 | 0.01  | -0.01 | 0     | 0     | -0.01 | 0     | 0     |
| Black pepper     | 0.01  | 0.02  | 0.04  | -0.03 | 0.39  | 0.07  | 0.05  | 0.06  | 0.01  | 0.11  | 0.02  | 0.07  | -0.03 | 0.03  | -0.03 | -0.02 | -0.15 |
| Blue cheese      | 0.01  | 0.05  | -0.02 | -0.05 | 0.06  | 0.02  | 0.23  | 0.13  | -0.04 | -0.01 | 0.45  | 0.02  | -0.01 | -0.03 | 0.01  | -0.01 | -0.06 |
| Bolognese sauce  | 0.46  | 0     | -0.02 | 0.05  | 0.12  | -0.01 | -0.01 | -0.01 | 0.07  | 0.18  | 0.09  | -0.07 | 0     | 0.07  | -0.01 | -0.11 | -0.04 |
| Broad beans      | -0.01 | 0.04  | 0.07  | -0.04 | 0.01  | 0.31  | 0.13  | 0.05  | 0.05  | -0.06 | 0.03  | 0.03  | -0.02 | 0.13  | 0.03  | 0.03  | -0.12 |
| Broccoli         | -0.01 | 0.05  | -0.01 | 0.02  | -0.02 | 0.64  | 0.01  | -0.01 | 0.14  | -0.04 | 0.02  | -0.04 | -0.02 | 0.04  | 0     | -0.06 | 0.02  |
| Brown rice       | -0.02 | 0.04  | 0.07  | -0.02 | 0.12  | 0.09  | -0.02 | 0.02  | 0.13  | -0.02 | 0.05  | -0.01 | -0.03 | 0.35  | 0     | -0.11 | -0.06 |
| Brussel sprout   | 0.01  | 0.01  | -0.07 | 0.04  | 0     | 0.7   | 0.03  | 0.02  | -0.06 | -0.02 | 0     | -0.03 | -0.01 | -0.04 | 0.04  | 0.03  | 0.01  |
| Burgers          | 0.59  | -0.04 | -0.09 | 0.03  | 0.07  | -0.04 | 0     | 0.02  | 0.03  | 0.02  | -0.02 | 0.1   | 0.02  | 0.03  | 0.11  | 0.04  | 0.13  |
| Burn spicy       | 0.01  | 0     | -0.04 | -0.02 | 0.73  | -0.01 | 0     | 0.03  | -0.04 | -0.05 | -0.01 | 0.06  | 0     | 0.01  | 0.03  | 0.02  | 0.03  |
| Butter on bread  | 0.05  | 0.01  | 0     | 0.1   | -0.04 | -0.01 | -0.02 | 0.01  | 0.02  | 0.09  | 0.16  | 0.14  | 0.03  | -0.06 | -0.04 | 0.35  | -0.05 |

|                      |       |       |       |       |       |       |       |       |       |       |       |       |       |       |       |       |       |
|----------------------|-------|-------|-------|-------|-------|-------|-------|-------|-------|-------|-------|-------|-------|-------|-------|-------|-------|
| Butternut squash     | -0.05 | 0     | 0.06  | 0.06  | 0.04  | 0.14  | 0.05  | -0.03 | 0.4   | 0.03  | 0.04  | 0.06  | -0.08 | 0.19  | -0.11 | -0.05 | -0.01 |
| Cabbage              | 0.05  | 0.02  | 0.01  | -0.02 | 0.01  | 0.73  | 0     | -0.02 | -0.04 | 0.03  | -0.04 | 0.03  | 0.01  | 0     | -0.02 | 0.04  | -0.01 |
| Cake                 | 0     | 0.01  | 0.02  | 0.81  | 0.01  | 0.02  | 0     | -0.01 | 0     | -0.02 | 0     | -0.02 | -0.04 | 0     | -0.02 | 0.02  | -0.04 |
| Cake icing           | 0.05  | -0.02 | -0.05 | 0.65  | -0.01 | 0.02  | -0.04 | 0.04  | -0.02 | 0.04  | 0     | 0     | 0.02  | -0.03 | 0.08  | -0.04 | -0.02 |
| Capers               | -0.02 | 0.1   | -0.02 | -0.04 | 0.08  | 0     | 0.31  | 0.04  | 0.17  | 0.14  | 0     | 0.18  | -0.07 | 0     | 0.04  | -0.05 | -0.12 |
| Cauliflower          | 0     | 0.01  | 0     | 0.02  | 0     | 0.73  | -0.01 | -0.01 | 0     | 0.01  | 0.06  | -0.03 | 0     | -0.05 | 0.02  | 0     | 0.04  |
| Cereal bar           | 0.01  | 0.01  | 0.03  | 0.18  | -0.02 | -0.04 | -0.01 | 0.03  | 0.05  | 0.02  | 0.04  | 0.01  | 0.01  | 0.35  | 0.16  | -0.09 | 0.13  |
| Cheesecake           | 0.03  | 0     | -0.05 | 0.42  | 0.05  | 0.01  | -0.04 | 0     | 0.02  | 0.03  | 0.21  | -0.08 | 0     | 0.06  | 0.09  | 0.06  | 0.1   |
| Cherries             | 0.01  | 0.01  | 0.57  | 0.08  | -0.01 | -0.03 | 0.1   | -0.01 | 0.05  | 0.02  | 0.03  | 0.05  | -0.01 | -0.07 | -0.04 | -0.01 | -0.07 |
| Chicken              | 0.76  | 0.13  | 0.02  | 0     | -0.02 | -0.01 | 0.04  | -0.07 | -0.06 | 0.03  | -0.04 | -0.09 | 0.01  | 0.09  | -0.1  | -0.04 | 0.07  |
| Chilli pepper        | -0.01 | 0     | -0.01 | -0.03 | 0.79  | 0.01  | 0.02  | 0.03  | 0.02  | 0     | -0.04 | 0.03  | -0.01 | 0.02  | 0.02  | 0     | 0     |
| Chips                | 0.06  | 0     | 0.02  | 0.17  | -0.02 | -0.02 | 0.02  | 0.09  | -0.07 | 0.06  | -0.05 | 0.25  | -0.01 | -0.03 | 0.05  | 0.13  | 0.07  |
| Cod                  | 0.08  | 0.73  | 0.01  | -0.02 | 0     | 0.05  | -0.01 | 0     | -0.09 | -0.02 | -0.04 | 0     | 0.01  | 0.03  | -0.02 | 0.07  | 0.08  |
| Coffee with sugar    | -0.01 | 0     | 0     | 0.02  | 0     | 0.01  | 0.02  | 0.05  | 0.01  | 0.02  | 0.02  | 0.01  | 0.77  | 0.04  | 0.01  | 0.02  | -0.02 |
| Coffee without sugar | 0.02  | 0     | -0.01 | 0.03  | 0.03  | 0.01  | 0.04  | 0.14  | 0.01  | 0     | 0.05  | -0.01 | -0.54 | 0.06  | 0.08  | 0.04  | 0.03  |
| Coriander            | -0.02 | 0.02  | 0.04  | -0.02 | 0.34  | 0.06  | 0.06  | 0.01  | 0.26  | 0.05  | -0.02 | 0.04  | -0.04 | 0.08  | -0.03 | -0.02 | -0.08 |
| Cornflakes           | 0.07  | -0.01 | 0.01  | 0.1   | -0.05 | 0.04  | -0.05 | 0.01  | -0.11 | 0.1   | -0.06 | 0.02  | 0.1   | 0.17  | 0.2   | 0.13  | 0.22  |
| Cream                | 0.08  | -0.02 | -0.02 | 0.23  | 0.02  | 0.02  | -0.05 | 0.02  | 0.1   | 0.1   | 0.21  | 0     | 0     | -0.08 | 0.02  | 0.42  | 0.01  |
| Croissant            | 0.03  | 0     | -0.02 | 0.27  | -0.03 | -0.09 | 0.06  | 0.02  | 0.2   | 0.03  | 0.12  | 0.05  | -0.04 | 0.02  | 0.19  | 0.07  | -0.01 |
| Cucumber             | -0.01 | 0     | 0.22  | -0.03 | 0     | 0.25  | 0.03  | -0.03 | 0.04  | 0.18  | 0.02  | 0.03  | -0.04 | -0.03 | 0.01  | -0.06 | 0.08  |
| Curry                | 0     | 0     | 0.01  | 0.05  | 0.76  | -0.01 | 0.02  | 0.01  | -0.01 | 0.03  | 0.03  | -0.07 | 0.01  | 0     | -0.03 | 0     | 0.03  |
| Dairy products       | 0.06  | 0.02  | 0.06  | 0.05  | 0.02  | 0.02  | -0.05 | -0.03 | -0.04 | 0.02  | 0.45  | 0.01  | 0     | 0.04  | -0.01 | 0.38  | 0.05  |
| Dark chocolate       | 0     | 0.06  | 0.04  | 0.14  | 0     | 0     | 0.03  | 0.15  | 0.01  | -0.04 | 0.07  | 0.03  | -0.05 | 0.13  | 0.05  | -0.02 | -0.18 |
| Diet fizzy drinks    | 0.07  | -0.06 | 0     | 0.09  | 0.07  | 0.02  | -0.07 | 0.03  | -0.06 | 0.05  | 0.02  | 0.13  | 0.04  | 0.02  | 0.07  | -0.11 | 0.39  |
| Dried fruit          | 0     | 0.03  | 0.3   | 0.16  | -0.02 | -0.01 | 0.06  | -0.01 | 0.01  | 0.02  | 0.06  | 0.01  | -0.02 | 0.21  | 0.06  | -0.03 | -0.16 |
| Eggs                 | 0.1   | 0.14  | 0.08  | -0.03 | -0.01 | 0.1   | -0.06 | 0.02  | -0.03 | 0.11  | 0.15  | -0.02 | 0.02  | 0.04  | -0.09 | 0.2   | 0.02  |
| EVO oil              | -0.02 | 0.05  | 0.04  | -0.08 | 0.1   | 0.02  | 0.17  | 0.04  | 0.24  | 0.17  | 0     | 0     | 0     | 0.09  | -0.05 | 0.05  | -0.17 |
| Fatty foods          | 0.17  | -0.03 | -0.13 | 0.11  | 0.1   | -0.01 | -0.01 | 0     | 0.06  | 0.01  | 0     | 0.3   | 0     | -0.07 | 0.02  | 0.25  | -0.01 |
| Tomatoes             | -0.02 | 0.01  | 0.32  | -0.08 | 0     | 0.17  | 0.06  | 0.01  | -0.04 | 0.17  | 0.05  | -0.04 | -0.02 | -0.06 | 0.01  | -0.01 | -0.02 |
| Fried chicken        | 0.49  | 0.08  | -0.04 | 0.04  | 0.02  | -0.06 | 0.03  | -0.02 | -0.02 | 0.04  | -0.07 | 0.09  | 0.07  | 0.04  | 0.09  | 0.13  | 0.1   |
| Fried fish           | 0.12  | 0.39  | -0.07 | 0.11  | 0.02  | -0.03 | 0.01  | 0.04  | -0.12 | 0.03  | -0.05 | 0.13  | 0.01  | -0.05 | 0.08  | 0.2   | 0.07  |

|                    |       |       |       |       |       |       |       |       |       |       |       |       |       |       |       |       |       |
|--------------------|-------|-------|-------|-------|-------|-------|-------|-------|-------|-------|-------|-------|-------|-------|-------|-------|-------|
| Fruit              | -0.01 | 0.01  | 0.68  | -0.01 | 0     | 0.02  | 0.01  | 0     | -0.02 | -0.05 | 0.01  | -0.03 | -0.02 | 0.04  | 0.03  | -0.03 | 0.01  |
| Garlic             | 0.01  | 0.01  | 0.02  | -0.05 | 0.36  | 0.06  | 0.04  | 0.03  | 0.19  | 0.18  | 0.01  | 0     | 0.01  | 0     | -0.09 | 0     | -0.12 |
| Gherkins           | 0.02  | 0     | 0.01  | -0.05 | 0.09  | 0.09  | 0.37  | 0     | -0.04 | 0.27  | 0     | 0.14  | -0.03 | -0.01 | 0.06  | -0.06 | -0.02 |
| Globe artichoke    | -0.05 | 0.01  | 0.01  | -0.06 | 0     | 0.06  | 0.19  | 0.05  | 0.38  | -0.01 | -0.02 | 0.13  | -0.05 | 0.03  | 0.06  | 0.01  | -0.09 |
| Goat cheese        | -0.02 | 0.02  | 0     | -0.05 | 0.01  | -0.02 | 0.14  | 0.04  | 0.19  | 0.01  | 0.39  | 0.04  | -0.04 | 0.11  | -0.04 | -0.01 | -0.04 |
| Grapefruit         | -0.01 | 0.02  | 0.23  | -0.01 | 0.06  | 0.05  | -0.03 | 0.03  | 0.04  | 0     | 0.04  | 0.1   | -0.06 | 0.01  | 0.29  | 0.01  | -0.06 |
| Green olives       | -0.01 | -0.01 | 0.01  | -0.01 | 0.01  | 0.01  | 0.94  | 0     | -0.02 | 0     | 0     | -0.01 | 0     | -0.01 | -0.01 | 0     | 0.03  |
| Haddock            | 0.03  | 0.79  | 0.01  | 0     | 0     | 0.05  | -0.01 | 0.01  | -0.07 | -0.03 | -0.01 | 0.02  | -0.01 | 0     | -0.01 | 0.03  | 0     |
| Ham                | 0.75  | 0.01  | 0     | 0.04  | -0.06 | 0.03  | -0.03 | 0.01  | -0.09 | 0.03  | 0.06  | 0.03  | 0.01  | -0.02 | 0.05  | -0.05 | 0     |
| Hard cheese        | 0     | 0.02  | 0.04  | -0.01 | 0.03  | 0.06  | 0     | 0.02  | -0.14 | 0.01  | 0.61  | 0.07  | -0.01 | 0     | -0.01 | 0.03  | -0.02 |
| Herring            | 0     | 0.57  | 0.02  | -0.04 | 0.02  | 0     | 0.05  | 0.03  | 0.02  | 0.02  | -0.01 | 0.01  | 0     | 0.03  | 0.1   | 0.01  | -0.13 |
| Honey              | -0.01 | 0.07  | 0.08  | 0.21  | -0.03 | -0.06 | 0.12  | 0.07  | 0.08  | 0.11  | 0.02  | -0.11 | 0.11  | 0.21  | 0.05  | 0.13  | -0.15 |
| Horseradish/wasabi | 0.03  | 0.02  | -0.05 | -0.04 | 0.22  | 0.07  | 0.22  | 0.08  | 0     | 0.23  | 0.02  | 0.06  | -0.03 | 0     | 0.04  | -0.02 | -0.06 |
| Ice cream          | 0.04  | 0.01  | 0.11  | 0.41  | 0.02  | -0.02 | -0.03 | 0.05  | -0.04 | -0.01 | 0.08  | -0.02 | 0.02  | -0.01 | 0.09  | 0.07  | 0.12  |
| Jam                | 0.03  | 0.01  | 0.07  | 0.5   | -0.05 | -0.01 | 0     | 0.06  | -0.05 | 0.12  | -0.06 | -0.03 | 0.05  | 0.08  | 0.1   | 0.08  | -0.09 |
| Kiwi               | 0     | 0.02  | 0.42  | 0.01  | 0.02  | 0.03  | 0.01  | -0.02 | 0.17  | 0.05  | 0.02  | -0.02 | -0.03 | 0.1   | 0.02  | -0.03 | 0.09  |
| Lager              | 0.01  | 0     | -0.05 | -0.04 | 0.08  | 0.01  | 0.03  | 0.46  | -0.04 | 0     | -0.03 | 0.04  | 0     | 0.04  | 0.12  | 0.03  | 0.16  |
| Lamb               | 0.74  | 0.06  | 0.03  | 0     | -0.03 | 0.02  | -0.01 | 0.02  | 0.07  | -0.01 | 0     | -0.05 | 0     | -0.04 | -0.02 | 0.07  | -0.09 |
| Lemons             | -0.01 | 0.03  | 0.21  | -0.03 | 0.13  | 0.04  | 0     | 0.02  | 0.14  | 0.14  | 0.01  | 0.16  | -0.09 | 0.02  | 0.16  | 0     | -0.18 |
| Lentil beans       | -0.1  | 0.04  | 0.1   | -0.03 | 0.17  | 0.25  | 0.07  | 0     | 0.07  | -0.02 | 0.01  | 0.05  | -0.01 | 0.26  | -0.05 | -0.01 | -0.11 |
| Liver              | 0.44  | 0.15  | 0.02  | -0.03 | -0.02 | 0.13  | -0.01 | 0.03  | -0.04 | 0.02  | 0.05  | -0.05 | 0.03  | 0.02  | -0.02 | 0.04  | -0.09 |
| Mackerel           | -0.03 | 0.71  | 0.01  | -0.01 | 0.04  | -0.01 | 0.03  | 0.01  | 0.02  | 0.02  | 0.02  | -0.01 | -0.01 | 0.02  | 0.03  | -0.03 | -0.1  |
| Marzipan           | 0.01  | 0     | 0.03  | 0.47  | -0.03 | 0.02  | 0.04  | 0.05  | -0.02 | 0.03  | 0.07  | 0.02  | -0.04 | 0.05  | 0.01  | -0.05 | -0.16 |
| Mayonnaise         | 0.01  | 0.01  | -0.09 | 0.06  | -0.05 | -0.01 | 0.01  | 0.02  | 0.09  | 0.5   | 0.16  | -0.01 | -0.02 | -0.05 | 0.01  | 0.08  | 0.02  |
| Melon              | 0.03  | 0     | 0.45  | 0.02  | -0.03 | 0.05  | 0.01  | 0     | 0.11  | 0.06  | 0.02  | -0.02 | 0.01  | 0     | 0.01  | -0.04 | 0.11  |
| Milk chocolate     | 0.01  | 0     | 0.02  | 0.43  | 0.05  | 0.02  | -0.03 | -0.02 | -0.02 | 0.02  | 0.05  | 0.02  | 0.03  | -0.03 | 0     | 0.08  | 0.25  |
| Mushroom           | 0.01  | 0.06  | 0.1   | -0.04 | 0.06  | 0.21  | 0.02  | 0.04  | 0.12  | 0.1   | 0.1   | -0.08 | 0.02  | -0.04 | -0.01 | -0.01 | 0.02  |
| Onion              | 0.03  | 0     | 0.09  | -0.06 | 0.3   | 0.24  | -0.04 | 0.01  | -0.03 | 0.2   | -0.01 | 0.02  | 0.02  | -0.03 | -0.04 | 0.05  | -0.12 |
| Orange juice       | 0.03  | 0.01  | 0.11  | 0.04  | 0.02  | 0.01  | -0.03 | 0.01  | -0.02 | 0.06  | 0     | -0.07 | 0.08  | -0.02 | 0.59  | 0.05  | 0.04  |
| Oranges            | 0.02  | 0.03  | 0.51  | -0.06 | 0.07  | 0.03  | -0.02 | 0     | -0.04 | -0.01 | -0.01 | 0     | -0.01 | -0.01 | 0.3   | 0.03  | 0.01  |
| Pasta              | 0.03  | 0     | 0     | 0.03  | 0.09  | 0.03  | 0.01  | 0.01  | 0.12  | 0.12  | 0.13  | -0.08 | 0.01  | 0.16  | 0.08  | -0.12 | -0.04 |

|                  |       |       |       |       |       |       |       |       |       |       |       |       |       |       |       |       |       |
|------------------|-------|-------|-------|-------|-------|-------|-------|-------|-------|-------|-------|-------|-------|-------|-------|-------|-------|
| Pears            | 0.02  | 0.03  | 0.56  | 0.04  | -0.03 | 0.04  | 0.02  | 0.01  | -0.02 | -0.03 | -0.03 | 0     | 0.02  | 0.08  | -0.03 | 0.05  | -0.01 |
| Pizza            | 0.01  | -0.05 | -0.06 | 0.15  | 0.07  | -0.04 | 0.04  | 0.04  | 0.04  | 0.06  | 0.18  | 0.07  | 0     | 0.06  | 0.18  | -0.06 | 0.09  |
| Plain yogurt     | -0.04 | 0.02  | 0.11  | -0.08 | 0.04  | 0.01  | 0.06  | 0     | 0.12  | 0.05  | 0.24  | -0.03 | -0.12 | 0.28  | -0.04 | 0.13  | 0.01  |
| Plums            | 0.02  | 0.01  | 0.69  | 0.03  | 0     | 0.03  | 0.03  | -0.01 | -0.01 | -0.01 | 0.02  | 0.02  | -0.02 | -0.02 | -0.03 | 0.01  | -0.05 |
| Pollock          | 0.01  | 0.45  | -0.01 | -0.05 | 0.04  | 0.05  | -0.04 | 0.02  | 0.13  | -0.01 | -0.02 | 0.08  | -0.02 | 0.1   | -0.01 | 0     | 0.03  |
| Pork chops       | 0.74  | 0.01  | 0.03  | 0.02  | -0.03 | 0.07  | -0.05 | 0.04  | -0.02 | -0.01 | 0.02  | -0.01 | 0     | -0.02 | 0.04  | 0.02  | -0.03 |
| Porridge         | -0.02 | 0.03  | 0.1   | 0.03  | -0.01 | 0.06  | 0.01  | 0.02  | -0.02 | 0.07  | 0     | -0.06 | -0.02 | 0.37  | -0.12 | 0.17  | 0.01  |
| Crisps           | 0.02  | -0.01 | 0.05  | 0.13  | -0.04 | 0     | 0.01  | 0.06  | -0.05 | 0.07  | 0.02  | 0.38  | -0.02 | -0.01 | 0.01  | -0.02 | 0.16  |
| Potatoes         | 0.03  | 0     | 0.09  | 0.03  | -0.02 | 0.13  | -0.02 | 0.05  | -0.1  | 0.07  | -0.05 | 0.1   | 0.04  | 0.06  | 0.04  | 0.15  | -0.06 |
| Prawns           | 0.11  | 0.46  | 0.09  | -0.04 | 0.03  | -0.06 | 0.02  | 0.07  | 0.19  | 0.15  | 0.09  | -0.07 | 0.02  | -0.2  | -0.04 | -0.04 | 0.14  |
| Raw carrots      | 0     | -0.01 | 0.3   | -0.06 | -0.01 | 0.19  | 0     | -0.01 | 0.05  | 0.07  | 0.02  | 0.1   | -0.05 | 0.14  | 0     | -0.08 | 0.03  |
| Red meat         | 0.86  | -0.05 | 0.02  | -0.01 | 0.01  | 0.01  | -0.03 | 0.06  | 0.02  | -0.03 | -0.01 | 0.01  | 0     | -0.05 | 0     | 0.07  | -0.03 |
| Red wine         | 0.04  | 0.03  | -0.02 | -0.01 | 0.03  | -0.02 | 0.1   | 0.6   | 0.08  | -0.04 | 0.05  | -0.05 | -0.05 | -0.02 | 0.05  | -0.02 | -0.12 |
| Fizzy drinks     | 0.05  | -0.03 | -0.03 | 0.14  | 0     | 0     | -0.02 | 0.06  | 0     | 0.04  | -0.05 | 0.11  | 0.16  | -0.01 | 0.23  | 0.06  | 0.21  |
| Roast chicken    | 0.77  | 0.13  | 0.02  | 0.02  | -0.03 | -0.01 | 0.05  | -0.07 | -0.05 | 0.03  | -0.03 | -0.05 | 0.01  | 0.07  | -0.1  | -0.01 | 0.05  |
| Salad dressing   | -0.02 | -0.01 | -0.02 | 0.02  | -0.01 | 0.03  | 0.05  | 0.03  | -0.02 | 0.58  | 0.07  | 0     | 0.01  | -0.03 | 0.05  | 0     | 0     |
| Salad leaves     | -0.03 | 0.02  | 0.21  | -0.08 | 0     | 0.29  | 0.01  | -0.01 | 0.08  | 0.15  | 0.04  | 0.04  | -0.04 | 0.07  | 0     | -0.09 | -0.02 |
| Salami           | 0.47  | 0.02  | -0.11 | -0.01 | 0.13  | -0.07 | 0.17  | 0.02  | 0.11  | 0.06  | 0.11  | 0.08  | 0.01  | 0     | 0.11  | -0.09 | -0.07 |
| Salmon           | 0.02  | 0.72  | 0.01  | 0.06  | -0.05 | 0     | 0.01  | 0.01  | 0.08  | 0     | 0.03  | -0.06 | -0.03 | -0.03 | -0.02 | -0.02 | 0.04  |
| Salty foods      | 0.01  | 0.03  | -0.01 | 0.02  | 0.04  | -0.04 | 0.01  | 0.01  | 0.01  | 0     | 0.06  | 0.7   | 0.06  | -0.02 | -0.04 | 0.03  | -0.01 |
| Salty pretzels   | 0.02  | -0.01 | -0.02 | 0.07  | 0.01  | -0.05 | 0.08  | 0.05  | 0.12  | 0.01  | 0.09  | 0.45  | -0.03 | 0.13  | 0.06  | -0.14 | 0.13  |
| Sardines         | 0     | 0.63  | 0.05  | -0.02 | 0.01  | -0.01 | 0.05  | 0.01  | -0.02 | 0.06  | 0.03  | -0.04 | 0.01  | 0.01  | 0.03  | 0     | -0.11 |
| Sausages         | 0.69  | 0     | -0.06 | 0.06  | 0.01  | -0.01 | -0.01 | 0.02  | -0.05 | 0     | 0.03  | 0.05  | 0     | -0.01 | 0.08  | 0     | -0.04 |
| Savoury biscuits | 0.01  | 0.03  | 0.06  | 0.17  | -0.04 | 0.04  | -0.01 | 0.03  | -0.05 | 0.06  | 0.25  | 0.25  | -0.01 | 0.08  | 0.04  | -0.11 | 0.01  |
| Shellfish        | 0.08  | 0.41  | 0.08  | -0.09 | 0.07  | -0.05 | 0.05  | 0.1   | 0.23  | 0.09  | 0.05  | -0.01 | 0.01  | -0.15 | -0.02 | -0.03 | 0.08  |
| Skimmed milk     | 0.03  | 0.04  | 0.03  | -0.03 | 0.02  | 0.05  | -0.02 | 0.02  | -0.07 | 0.02  | 0.09  | -0.05 | -0.04 | 0.2   | -0.01 | -0.04 | 0.2   |
| Smoked fish      | 0.01  | 0.68  | -0.01 | 0.02  | 0.05  | -0.01 | 0.04  | 0.02  | -0.01 | 0     | 0.07  | 0.08  | 0     | -0.03 | 0.05  | -0.06 | -0.07 |
| Soft cheese      | 0     | 0.01  | 0.01  | 0     | 0     | 0.01  | 0.05  | 0.01  | 0.07  | 0.09  | 0.61  | 0.03  | 0.01  | 0.02  | 0.01  | 0.05  | 0.04  |
| Soy sauce        | 0.02  | 0.03  | 0     | 0.01  | 0.25  | -0.01 | 0     | 0.04  | 0.14  | 0.25  | 0.03  | 0.15  | 0.02  | 0.06  | 0     | -0.09 | -0.01 |
| Soy milk         | -0.18 | -0.01 | 0     | -0.01 | 0.01  | 0.01  | 0.03  | 0.02  | 0.18  | 0.06  | -0.1  | 0.06  | 0.02  | 0.3   | -0.03 | 0.02  | 0.07  |
| Spicy foods      | -0.01 | 0     | 0.01  | 0.03  | 0.92  | -0.02 | 0.01  | 0     | -0.04 | -0.03 | 0.02  | -0.02 | 0     | -0.03 | -0.01 | 0     | 0.01  |

|                     |       |       |       |       |       |       |       |       |       |       |       |       |       |       |       |       |       |
|---------------------|-------|-------|-------|-------|-------|-------|-------|-------|-------|-------|-------|-------|-------|-------|-------|-------|-------|
| Spinach             | -0.04 | 0.07  | -0.01 | -0.05 | 0.05  | 0.34  | 0.12  | 0     | 0.33  | -0.01 | 0.02  | 0     | -0.03 | 0.11  | 0     | 0     | -0.06 |
| Spirits             | 0.02  | -0.02 | 0.04  | 0.03  | 0.03  | 0.01  | -0.05 | 0.74  | 0     | 0.08  | 0.01  | 0.05  | 0.02  | -0.02 | -0.13 | -0.04 | 0.1   |
| Strawberries        | 0.02  | 0     | 0.49  | 0.08  | 0.02  | 0     | -0.02 | 0.02  | 0.06  | 0.03  | 0.03  | -0.04 | -0.02 | -0.07 | 0.03  | 0.03  | 0.06  |
| Sweet coffee drinks | -0.01 | -0.01 | -0.04 | 0.11  | 0.01  | 0.01  | -0.02 | 0.03  | 0.03  | 0.08  | 0.01  | -0.03 | 0.3   | 0.13  | 0.07  | 0.08  | 0.21  |
| Sweet foods         | -0.02 | -0.01 | 0.02  | 0.76  | 0.05  | -0.01 | -0.02 | -0.06 | 0.06  | 0     | -0.05 | 0.07  | 0.08  | -0.01 | -0.05 | 0.02  | 0.06  |
| Tea with sugar      | -0.01 | 0     | 0     | -0.02 | 0.01  | 0.01  | 0.02  | 0.03  | 0.01  | -0.03 | 0.02  | 0.03  | 0.76  | 0.02  | 0.03  | 0     | -0.02 |
| Tea without sugar   | 0     | 0.04  | 0.01  | 0.03  | -0.03 | 0.01  | 0.03  | 0.07  | -0.03 | 0.04  | -0.04 | -0.01 | -0.48 | 0.13  | 0.01  | 0.14  | 0.01  |
| Ketchup             | 0.01  | -0.02 | -0.04 | 0.09  | -0.02 | 0     | 0.01  | 0.06  | -0.08 | 0.39  | -0.07 | 0.01  | 0.05  | 0.08  | 0.06  | 0.05  | 0.09  |
| Tinned Tuna         | 0.07  | 0.46  | -0.02 | -0.01 | 0.01  | 0.02  | -0.01 | -0.03 | -0.06 | 0.17  | 0.04  | -0.02 | -0.02 | 0.1   | -0.02 | -0.06 | 0.12  |
| Turnip              | 0.04  | 0.01  | 0.04  | -0.01 | 0.04  | 0.41  | -0.01 | 0.02  | 0.02  | 0.06  | -0.06 | 0.03  | -0.01 | 0.14  | 0     | 0.03  | 0.02  |
| Vegetables          | -0.03 | 0.02  | 0.14  | -0.02 | -0.01 | 0.6   | 0.02  | 0     | 0.04  | 0     | 0.01  | -0.02 | -0.01 | 0.03  | -0.05 | -0.04 | -0.03 |
| Vinegar             | 0     | -0.01 | 0.05  | -0.02 | 0.12  | 0.05  | 0     | 0.03  | -0.18 | 0.38  | -0.06 | 0.21  | -0.02 | 0.05  | 0.05  | 0.04  | -0.03 |
| Whisky              | 0.01  | 0     | 0     | 0     | 0.01  | -0.01 | 0.02  | 0.66  | -0.07 | -0.01 | -0.03 | -0.01 | 0.04  | 0.05  | -0.03 | 0.04  | -0.04 |
| White bread         | 0.08  | -0.03 | -0.02 | 0.11  | 0     | 0.03  | -0.01 | 0     | -0.03 | 0.06  | -0.07 | 0.16  | 0.06  | -0.11 | 0.15  | 0.2   | 0.17  |
| White rice          | 0.09  | 0.02  | 0.04  | 0.07  | 0.12  | 0.05  | 0     | -0.02 | 0.04  | 0.09  | -0.01 | 0.02  | 0.05  | 0.01  | 0.14  | 0.05  | 0.04  |
| White wine          | 0.01  | 0.05  | 0.03  | 0.04  | -0.04 | -0.01 | 0     | 0.5   | 0.13  | 0.01  | 0.09  | 0.02  | -0.06 | -0.09 | 0.08  | -0.06 | -0.03 |
| Whole grain cereals | 0     | 0.04  | 0.1   | 0.04  | -0.02 | 0.01  | 0     | 0.03  | -0.02 | -0.03 | 0.08  | -0.06 | -0.04 | 0.48  | 0.09  | -0.01 | 0.02  |
| Whole milk          | 0.05  | 0.01  | -0.02 | 0.01  | 0     | -0.03 | 0     | 0.02  | 0.07  | -0.01 | 0.1   | 0.04  | 0.11  | 0.07  | 0.12  | 0.49  | -0.06 |
| Wholemeal bread     | 0     | 0.05  | 0.11  | 0.02  | 0.02  | 0.09  | -0.03 | 0.03  | -0.03 | -0.02 | 0.14  | -0.03 | -0.05 | 0.3   | 0.03  | -0.07 | -0.09 |

Supplementary Table 3: Dimension of FPQ items based on Exploratory Factor Analysis

| Factor | SS loadings | Percentage of variance | Items                                                                                                                                                                  | Dimension               |
|--------|-------------|------------------------|------------------------------------------------------------------------------------------------------------------------------------------------------------------------|-------------------------|
| MR2    | 7.89        | 0.06                   | Bacon, BBQ grilled meat, Beef steak, Bolognese sauce, Burgers, Chicken, Fried chicken, Ham, Lamb, Liver, Pork chop, Red meat, Roast chicken, Salami, Sausages          | Meat and Processed meat |
| MR5    | 5.64        | 0.04                   | Baked/steam fish, Cod, Fried fish, Haddock, Herring, Mackerel, Pollock, Prawns, Salmon, Sardines, Shellfish, Smoked fish, Tinned tuna                                  | Fish/Seafood            |
| MR7    | 4.43        | 0.03                   | Apple juice, Apples, Bananas, Cherries, Dried fruit, Tomatoes, Grapefruit, Fruits, Kiwi, Lemons, Melon, Orange juice, Oranges, Pears, Plums, Raw carrots, Strawberries | Fruits                  |
| MR3    | 4.41        | 0.03                   | Biscuits, Cake, Cake icing, Cheesecake, Croissant, Dark Chocolate, Ice cream, Jam, Marzipan, Milk chocolate, Sweet foods                                               | Dessert                 |
| MR4    | 4.29        | 0.03                   | Aniseed, Bell pepper, Bitter foods, Black pepper, Burn spicy, Chilli pepper, Coriander, Curry, Garlic, Horseradish/wasabi, Onions, Spicy foods                         | Strong flavours         |
| MR9    | 4.2         | 0.03                   | Bitter ale, Lager, Red wine, Spirits, Whisky, White wine                                                                                                               | Alcohol                 |
| MR16   | 3.43        | 0.02                   | Black olives, Capers, Gherkins, Green olives                                                                                                                           | Sharp flavours          |
| MR12   | 2.79        | 0.02                   | Chips, Pasta, Pizza, Potatoes, white rice                                                                                                                              | Starchy foods           |
| MR1    | 2.77        | 0.02                   | Asparagus, Aubergine, Avocados, Butternut squash, Globe artichoke                                                                                                      | Strong vegetables       |
| MR14   | 2.58        | 0.02                   | EVO oil, Mayonnaise, Salad dressing, Soy sauce, Tomato ketchup, Vinegar                                                                                                | Sauces                  |
| MR11   | 2.48        | 0.02                   | Blue cheese, Dairy products, Goat cheese, Hard cheese, Soft cheese                                                                                                     | Dairy                   |
| MR10   | 2.39        | 0.02                   | Add salt to food, Crips, Fatty foods, Salty foods, Salty pretzel, Savoury biscuits                                                                                     | Salty/Savoury           |
| MR8    | 2.29        | 0.02                   | Coffee with sugar, Coffee without sugar, Sweet coffee drinks, Tea with sugar, Tea without sugar                                                                        | Beverages               |
| MR15   | 2.18        | 0.02                   | Butter on bread, Cream, Eggs, White bread, Whole milk                                                                                                                  | Breakfast               |
| MR13   | 1.81        | 0.01                   | Brown rice, Cereal bar, Honey, Plain yogurt, Porridge, Skimmed milk, Soya milk, Whole grain cereals, Wholemeal bread                                                   | Prudent breakfast       |
| MR17   | 1.67        | 0.01                   | Beetroot, Broad beans, Broccoli, Brussel sprouts, Cabbage, Cauliflower, Cucumber, Lentil beans, Mushrooms, Salad leaves, Spinach, Turnip, Vegetables                   | Vegetables              |
| MR18   | 1.55        | 0.01                   | Corn flakes, Diet fizzy drinks, Fizzy drinks                                                                                                                           | Processed foods         |

Note: Factors are ordered based on SS loadings



Supplementary Table 4: Actual daily nutrient intake for each food preference groups

| Nutrient                         | Reference value (age 19 – 64)                                | X1 (Health-conscious) | X2 (Omnivore) | X3 (Sweet-tooth) | p-value |
|----------------------------------|--------------------------------------------------------------|-----------------------|---------------|------------------|---------|
| <b>Energy (kJ)</b>               | Males: 10,500 kJ/day<br>Females: 8,400 kJ/day                | 8,330 ± 2,182         | 8,910 ± 2,348 | 8,712 ± 2,456    | <0.001  |
| <b>Protein (g)</b>               | Males: 55,5 g/day<br>Females: 45 g/day                       | 78 ± 22               | 84 ± 23       | 80 ± 24          | <0.001  |
| <b>Carbohydrate (g)</b>          | Males: [at least] 333 g/day<br>Females: [at least] 267 g/day | 245 ± 71              | 258 ± 74      | 258 ± 79         | <0.001  |
| <b>Fat (g)</b>                   | Males: [less than] 97 g/day<br>Females: [less than] 78 g/day | 70 ± 26               | 76 ± 27       | 74 ± 28          | <0.001  |
| <b>Saturated fatty acids (g)</b> | Males: [less than] 31 g/day<br>Females: [less than] 24 g/day | 25 ± 11               | 29 ± 12       | 28 ± 12          | <0.001  |
| <b>Total sugar (g)</b>           | 90 g                                                         | 123 ± 44              | 126 ± 45      | 125 ± 49         | <0.001  |
| <b>Free sugar (g)</b>            | Males: [less than] 33 g/day<br>Females: [less than] 27 g/day | 51 ± 28               | 63 ± 34       | 65 ± 37          | <0.001  |
| <b>Dietary fibre (g)</b>         | 30 g/day                                                     | 19 ± 7                | 18 ± 6        | 17 ± 6           | <0.001  |

Note: This table shows the number of people in each food preference group (Health-conscious, Omnivore, or Sweet-tooth) in a total sample of 124,062 participants with complete data; Data are presented as mean ± SD; The p-value indicates the probability of observing a difference in nutrient intake across groups by chance. A low p-value (<0.05) suggests that the difference is statistically significant. The p-value is calculated by Kruskal-Wallis rank sum test; Reference value based on Government Dietary Recommendations 2016.

Supplementary Table 5: Blood biochemistry and blood count for each food preference groups

| Characteristic                        | N       | Health-conscious,       |                                   | Sweet-tooth, N =    |        | p-value <sup>2</sup>                           | Reference range |
|---------------------------------------|---------|-------------------------|-----------------------------------|---------------------|--------|------------------------------------------------|-----------------|
|                                       |         | N = 58,625 <sup>1</sup> | Omnivore, N = 69,504 <sup>1</sup> | 53,608 <sup>1</sup> |        |                                                |                 |
| alanine_aminotransferase_f30620_0_0   | 170,883 | 21 (12)                 | 23 (13)                           | 24 (14)             | <0.001 | < 35 U/L                                       |                 |
| albumin_f30600_0_0                    | 156,275 | 45.44 (2.56)            | 45.35 (2.55)                      | 45.30 (2.61)        | <0.001 | 35–54 g/L                                      |                 |
| alkaline_phosphatase_f30610_0_0       | 170,929 | 79 (24)                 | 82 (24)                           | 83 (24)             | <0.001 | 36–150 U/L                                     |                 |
| apolipoprotein_a_f30630_0_0           | 155,293 | 1.62 (0.28)             | 1.54 (0.26)                       | 1.52 (0.26)         | <0.001 | 0.98–2.1 g/L (females); 0.88–1.8 g/L (males)   |                 |
| apolipoprotein_b_f30640_0_0           | 170,166 | 1.02 (0.23)             | 1.04 (0.23)                       | 1.03 (0.24)         | <0.001 | 0.44–1.48 g/L (females); 0.55–1.51 g/L (males) |                 |
| aspartate_aminotransferase_f30650_0_0 | 170,313 | 25 (9)                  | 26 (9)                            | 26 (10)             | <0.001 | < 35 U/L                                       |                 |
| creactive_protein_f30710_0_0          | 170,591 | 1.94 (3.73)             | 2.32 (3.89)                       | 2.47 (4.08)         | <0.001 | < 8.0 mg/L                                     |                 |
| calcium_f30680_0_0                    | 156,238 | 2.38 (0.09)             | 2.38 (0.09)                       | 2.38 (0.09)         | 0.001  | 2.2–2.6 mmol/L                                 |                 |
| cholesterol_f30690_0_0                | 170,929 | 5.80 (1.09)             | 5.74 (1.11)                       | 5.68 (1.12)         | <0.001 | 3.88–5.15 mmol/L                               |                 |
| creatinine_f30700_0_0                 | 170,835 | 68 (14)                 | 73 (15)                           | 74 (16)             | <0.001 | Men: 60–110 mcmol/L; Women: 45–90 mcmol/L      |                 |
| cystatin_c_f30720_0_0                 | 170,925 | 0.86 (0.13)             | 0.89 (0.14)                       | 0.90 (0.15)         | <0.001 |                                                |                 |
| direct_bilirubin_f30660_0_0           | 146,321 | 1.80 (0.82)             | 1.84 (0.82)                       | 1.85 (0.81)         | <0.001 | 0–5.1 mcmol/L                                  |                 |
| gamma_glutamyltransferase_f30730_0_0  | 170,851 | 30 (31)                 | 35 (34)                           | 37 (38)             | <0.001 | Adult male: 8–61 U/L; Adult female: 5–36 U/L   |                 |
| glucose_f30740_0_0                    | 156,107 | 5.03 (0.99)             | 5.04 (1.02)                       | 5.08 (1.13)         | <0.001 | < 7.8 mmol/L (2 h pp)                          |                 |
| glycated_haemoglobin_hba1c_f30750_0_0 | 169,871 | 35.0 (5.1)              | 35.3 (5.4)                        | 35.6 (6.0)          | <0.001 | <42 mmol/mol                                   |                 |
| hdl_cholesterol_f30760_0_0            | 156,226 | 1.59 (0.40)             | 1.46 (0.37)                       | 1.42 (0.37)         | <0.001 | ≥ 1.04 mmol/L                                  |                 |
| igf1_f30770_0_0                       | 170,025 | 21.8 (5.6)              | 21.9 (5.5)                        | 21.6 (5.7)          | <0.001 |                                                |                 |
| ldl_direct_f30780_0_0                 | 170,591 | 3.58 (0.83)             | 3.60 (0.85)                       | 3.57 (0.85)         | <0.001 | ≤ 3.36 mmol/L                                  |                 |
| lipoprotein_a_f30790_0_0              | 137,100 | 44 (49)                 | 44 (49)                           | 44 (49)             | 0.3    |                                                |                 |
| oestradiol_f30800_0_0                 | 30,480  | 514 (450)               | 466 (448)                         | 463 (441)           | <0.001 | 30 - 500 pg/mL (females); <56 pg/mL (males)    |                 |
| phosphate_f30810_0_0                  | 155,959 | 1.18 (0.16)             | 1.16 (0.16)                       | 1.15 (0.16)         | <0.001 | 0.8 – 1.5 mmol/L                               |                 |
| rheumatoid_factor_f30820_0_0          | 14,667  | 24 (20)                 | 24 (19)                           | 24 (20)             | 0.9    | <20 IU/mL                                      |                 |
| shbg_f30830_0_0                       | 154,713 | 59 (30)                 | 51 (27)                           | 50 (27)             | <0.001 |                                                |                 |
| testosterone_f30850_0_0               | 154,616 | 4.8 (5.7)               | 6.9 (6.1)                         | 7.2 (6.1)           | <0.001 | 0.7–2.6 nmol/L (females); 10–42 nmol/L (males) |                 |
| total_bilirubin_f30840_0_0            | 170,218 | 9.1 (4.4)               | 9.3 (4.6)                         | 9.3 (4.5)           | <0.001 | 5.1–20.5 mcmol/L                               |                 |
| total_protein_f30860_0_0              | 156,120 | 72.1 (4.0)              | 72.4 (4.0)                        | 72.4 (4.0)          | <0.001 | 60 – 80 g/L                                    |                 |
| triglycerides_f30870_0_0              | 170,788 | 1.50 (0.87)             | 1.71 (0.98)                       | 1.78 (1.05)         | <0.001 | < 2.30 mmol/L (non-fasting)                    |                 |

|                      |         |             |             |             |        |                  |
|----------------------|---------|-------------|-------------|-------------|--------|------------------|
| urate_f30880_0_0     | 170,742 | 286 (75)    | 309 (78)    | 313 (80)    | <0.001 | 150–470 mcmol/L  |
| urea_f30670_0_0      | 170,811 | 5.18 (1.25) | 5.44 (1.26) | 5.34 (1.33) | <0.001 | 2.5 – 7.8 mmol/L |
| vitamin_d_f30890_0_0 | 163,688 | 50 (21)     | 50 (21)     | 48 (21)     | <0.001 | 25–65 pg/mL      |

<sup>1</sup> Mean (SD)

<sup>2</sup> Kruskal-Wallis rank sum test

Note: This table shows the number of people in each food preference group (Health-conscious, Omnivore, or Sweet-tooth) in a total sample of 181,738 participants; Data are presented as mean ± SD; The p-value indicates the probability of observing a difference in parameter value across groups by chance. A low p-value (<0.05) suggests that the difference is statistically significant. The p-value is calculated by Kruskal-Wallis rank sum test; Reference ranges are for non-fasting adults, taken from MSD manual, USA

Supplementary Table 6: pairwise group tests for metabolomics differential expression for Volcano3D plot

|                | <b>X1</b> | <b>X2</b> | <b>X3</b> | <b>x</b> | <b>y</b> | <b>r</b> | <b>angle</b> | <b>z</b> | <b>pvalue</b> | <b>col</b> | <b>lab</b> |
|----------------|-----------|-----------|-----------|----------|----------|----------|--------------|----------|---------------|------------|------------|
| Clinical_LDL_C | 0.039174  | 0.006158  | -0.0547   | 0.063446 | 0.052707 | 0.082483 | 39.71773     | 12.16539 | 6.8330395     | purple     | H+O+       |
| VLDL_size      | -0.19421  | 0.074871  | 0.118519  | -0.2909  | -0.0378  | 0.29335  | 187.4035     | 168.5763 | 2.6527994     | gold2      | O+S+       |
| LDL_size       | 0.011524  | -0.01294  | 0.005278  | 0.015356 | -0.01578 | 0.022017 | 314.2234     | 1.013319 | 0.09698       | grey60     | ns         |
| HDL_size       | 0.284062  | -0.10624  | -0.17809  | 0.426227 | 0.06223  | 0.430746 | 8.306637     | 264.871  | 1.3457311     | purple     | H+O+       |
| Phosphoglyc    | 0.147748  | -0.03389  | -0.12359  | 0.226486 | 0.077686 | 0.239439 | 18.93218     | 105.6772 | 2.1026465     | purple     | H+O+       |
| Cholines       | 0.166539  | -0.04276  | -0.1327   | 0.254267 | 0.077891 | 0.26593  | 17.03169     | 129.7583 | 1.7446125     | purple     | H+O+       |
| Phosphatidylc  | 0.173119  | -0.04358  | -0.1392   | 0.264509 | 0.082811 | 0.277169 | 17.38404     | 140.4789 | 3.3197347     | purple     | H+O+       |
| Sphingomyelins | 0.171414  | -0.04328  | -0.13764  | 0.261874 | 0.081715 | 0.274327 | 17.33002     | 137.5047 | 3.1284315     | purple     | H+O+       |
| ApoB           | -0.00574  | 0.019406  | -0.02141  | -0.00474 | 0.035344 | 0.03566  | 97.63598     | 2.570218 | 0.00269       | red        | O+         |
| ApoA1          | 0.224385  | -0.06911  | -0.16213  | 0.340005 | 0.080552 | 0.349416 | 13.32852     | 223.3712 | 4.2543789     | purple     | H+O+       |
| Unsaturation   | 0.246878  | -0.05827  | -0.20412  | 0.378072 | 0.126305 | 0.398612 | 18.47319     | 286.6787 | 2.0957083     | purple     | H+O+       |
| Omega_3        | 0.142539  | 2.3813607 | -0.16662  | 0.225837 | 0.144319 | 0.268012 | 32.58018     | 11.91578 | 1.2140056     | purple     | H+O+       |
| Omega_6        | 0.081445  | -0.0226   | -0.06244  | 0.123968 | 0.034499 | 0.128679 | 15.55133     | 30.55569 | 2.7816890     | purple     | H+O+       |
| MUFA           | -0.11289  | 0.042311  | 0.07064   | -0.16936 | -0.02453 | 0.17113  | 188.2425     | 59.06138 | 8.6820688     | gold2      | O+S+       |
| SFA            | -0.05258  | 0.036137  | 0.009098  | -0.07519 | 0.023416 | 0.078754 | 162.7029     | 13.72797 | 1.8708155     | gold2      | O+S+       |
| LA             | 0.087945  | -0.03371  | -0.05395  | 0.131776 | 0.017529 | 0.132937 | 7.577177     | 33.37616 | 4.2057558     | blue       | H+         |
| DHA            | 0.22388   | -0.03134  | -0.21625  | 0.347676 | 0.160137 | 0.382783 | 24.73048     | 257.589  | 2.5764429     | purple     | H+O+       |
| Ala            | -0.05336  | 0.010848  | 0.046645  | -0.0821  | -0.031   | 0.087762 | 200.6854     | 13.98006 | 1.0469881     | gold2      | O+S+       |
| Gln            | 0.028002  | -0.01681  | -0.00838  | 0.040595 | -0.00731 | 0.041248 | 349.7983     | 3.504041 | 0.000313      | blue       | H+         |
| Gly            | 0.150324  | -0.10989  | -0.01651  | 0.21352  | -0.08087 | 0.228321 | 339.256      | 107.3751 | 4.2160852     | cyan       | H+S+       |
| His            | -0.00171  | 0.013572  | -0.01766  | 0.000338 | 0.027051 | 0.027053 | 89.28368     | 1.452029 | 0.035316      | red        | O+         |
| Ile            | -0.10679  | 0.065608  | 0.029769  | -0.15448 | 0.031038 | 0.157567 | 168.6395     | 51.40983 | 3.8919371     | gold2      | O+S+       |
| Leu            | -0.13949  | 0.0917    | 0.030192  | -0.20044 | 0.053267 | 0.207396 | 165.1175     | 60.27748 | 5.2785896     | gold2      | O+S+       |
| Val            | -0.12134  | 0.086259  | 0.016853  | -0.17289 | 0.060107 | 0.183042 | 160.8297     | 71.23334 | 5.8433216     | gold2      | O+S+       |
| Phe            | -0.0393   | 0.017704  | 0.020281  | -0.05829 | -0.00223 | 0.058332 | 182.192      | 1.39494  | 0.040277      | grey60     | ns         |
| Tyr            | -0.02317  | 0.029435  | -0.01556  | -0.0301  | 0.03897  | 0.049243 | 127.685      | 5.191246 | 6.4380517     | red        | O+         |
| Glucose        | -0.0024   | -0.00559  | 0.010903  | -0.00506 | -0.01428 | 0.015152 | 250.4991     | 0.400612 | 0.397547      | grey60     | ns         |
| Lactate        | -0.06546  | 0.0168    | 0.052173  | -0.09995 | -0.03063 | 0.10454  | 197.0396     | 20.83727 | 1.4545525     | gold2      | O+S+       |

|              |          |           |          |          |          |          |          |           |           |        |      |
|--------------|----------|-----------|----------|----------|----------|----------|----------|-----------|-----------|--------|------|
| Pyruvate     | 0.010544 | -0.00985  | 0.001949 | 0.014496 | -0.01022 | 0.017736 | 324.8132 | 0.650841  | 0.223439  | grey60 | ns   |
| Citrate      | 0.05614  | -0.04409  | -0.00175 | 0.079057 | -0.03667 | 0.087146 | 335.1187 | 16.24356  | 5.7073830 | cyan   | H+S+ |
| bOHbutyrate  | 0.029029 | -0.01875  | -0.00676 | 0.041786 | -0.01039 | 0.043058 | 346.0417 | 3.651046  | 0.000223  | blue   | H+   |
| Acetate      | -0.00109 | 0.012283  | -0.01652 | 0.001022 | 0.02494  | 0.024961 | 87.65322 | 1.110527  | 0.07753   | grey60 | ns   |
| Acetoacetate | 0.020448 | -0.00397  | -0.01815 | 0.031507 | 0.012286 | 0.033817 | 21.3027  | 1.772276  | 0.016894  | blue   | H+   |
| Acetone      | 0.029559 | -0.00752  | -0.02365 | 0.045145 | 0.013967 | 0.047257 | 17.19101 | 2.092289  | 0.008086  | blue   | H+   |
| Creatinine   | -0.1915  | 0.084556  | 0.101327 | -0.28445 | -0.01452 | 0.284817 | 182.923  | 168.0486  | 8.9415817 | gold2  | O+S+ |
| Albumin      | 0.066434 | 9.2934646 | -0.07778 | 0.105276 | 0.067437 | 0.125023 | 32.64266 | 28.06168  | 8.6759919 | purple | H+O+ |
| GlycA        | -0.14228 | 0.041842  | 0.105678 | -0.21604 | -0.05528 | 0.223005 | 194.3534 | 94.15887  | 6.9364128 | gold2  | O+S+ |
| XXL_VLDL_P   | -0.18148 | 0.068283  | 0.113188 | -0.27222 | -0.03889 | 0.274983 | 188.1302 | 2.8929823 | 1         | grey60 | ns   |
| XXL_VLDL_PL  | -0.18385 | 0.067716  | 0.116774 | -0.27609 | -0.04249 | 0.279344 | 188.7481 | 111.2784  | 5.2677937 | gold2  | O+S+ |
| XXL_VLDL_CE  | -0.18861 | 0.071068  | 0.117479 | -0.28288 | -0.04019 | 0.285722 | 188.0867 | 40.88199  | 1.3122362 | gold2  | O+S+ |
| XXL_VLDL_FC  | -0.17913 | 0.066531  | 0.112977 | -0.26889 | -0.04022 | 0.271878 | 188.5079 | 14.93809  | 1.1532030 | gold2  | O+S+ |
| XXL_VLDL_TG  | -0.18084 | 0.068768  | 0.111739 | -0.2711  | -0.03721 | 0.273641 | 187.8162 | 159.3186  | 4.8014964 | gold2  | O+S+ |
| XL_VLDL_P    | -0.18948 | 0.076993  | 0.109917 | -0.28293 | -0.02851 | 0.284368 | 185.7547 | 6.2681285 | 1         | grey60 | ns   |
| XL_VLDL_PL   | -0.18503 | 0.074872  | 0.107792 | -0.27637 | -0.02851 | 0.277832 | 185.8897 | 9.012747  | 9.7107651 | gold2  | O+S+ |
| XL_VLDL_CE   | -0.15917 | 0.070037  | 0.084567 | -0.23647 | -0.01258 | 0.236805 | 183.0461 | 11.46638  | 3.4168270 | gold2  | O+S+ |
| XL_VLDL_FC   | -0.17768 | 0.072919  | 0.102025 | -0.26515 | -0.02521 | 0.266345 | 185.4305 | 0.457352  | 0.348858  | grey60 | ns   |
| XL_VLDL_TG   | -0.19083 | 0.078198  | 0.109744 | -0.2848  | -0.02732 | 0.286104 | 185.4793 | 16.72429  | 1.8867292 | gold2  | O+S+ |
| L_VLDL_P     | -0.17792 | 0.075143  | 0.099085 | -0.26503 | -0.02073 | 0.265842 | 184.4733 | 1.1523713 | 1         | grey60 | ns   |
| L_VLDL_PL    | -0.18551 | 0.076992  | 0.105279 | -0.27665 | -0.0245  | 0.27773  | 185.0604 | 5.82141   | 1.5086546 | gold2  | O+S+ |
| L_VLDL_CE    | -0.13381 | 0.063126  | 0.064939 | -0.19784 | -0.00157 | 0.197846 | 180.4546 | 6.24733   | 5.6580892 | gold2  | O+S+ |
| L_VLDL_FC    | -0.18105 | 0.076917  | 0.100173 | -0.26959 | -0.02014 | 0.270345 | 184.2724 | 1.061684  | 0.086759  | grey60 | ns   |
| L_VLDL_TG    | -0.17703 | 0.077388  | 0.094789 | -0.26311 | -0.01507 | 0.263545 | 183.278  | 46.38416  | 4.1289506 | gold2  | O+S+ |
| M_VLDL_P     | -0.07678 | 0.045299  | 0.024112 | -0.11148 | 0.018349 | 0.112984 | 170.6536 | 9.0164618 | 1         | grey60 | ns   |
| M_VLDL_PL    | -0.06459 | 0.040623  | 0.016641 | -0.09322 | 0.020769 | 0.095508 | 167.4399 | 0.18217   | 0.6574    | grey60 | ns   |
| M_VLDL_CE    | 0.052831 | -0.00356  | -0.05659 | 0.082904 | 0.045923 | 0.094774 | 28.98308 | 0.023726  | 0.946835  | grey60 | ns   |
| M_VLDL_FC    | -0.03862 | 0.032328  | -0.00169 | -0.05394 | 0.029463 | 0.061462 | 151.3557 | 0         | 1         | grey60 | ns   |
| M_VLDL_TG    | -0.1538  | 0.070153  | 0.078126 | -0.22794 | -0.0069  | 0.228045 | 181.7351 | 7.486948  | 3.2587553 | gold2  | O+S+ |
| S_VLDL_P     | -0.11068 | 0.052746  | 0.052942 | -0.16352 | -0.00017 | 0.163519 | 180.0595 | 1.7598976 | 1         | grey60 | ns   |
| S_VLDL_PL    | -0.06654 | 0.040155  | 0.019595 | -0.09641 | 0.017806 | 0.098043 | 169.5361 | 12.24967  | 5.6277027 | gold2  | O+S+ |

|            |          |          |          |          |          |          |          |           |           |        |      |
|------------|----------|----------|----------|----------|----------|----------|----------|-----------|-----------|--------|------|
| S_VLDL_CE  | -0.08341 | 0.044183 | 0.033476 | -0.12224 | 0.009273 | 0.122587 | 175.6619 | 1.979401  | 0.010486  | gold2  | O+S+ |
| S_VLDL_FC  | -0.03194 | 0.028601 | -0.0041  | -0.04419 | 0.028319 | 0.052489 | 147.3487 | 0.022816  | 0.94882   | grey60 | ns   |
| S_VLDL_TG  | -0.13804 | 0.060071 | 0.074306 | -0.20522 | -0.01233 | 0.205594 | 183.4377 | 84.7977   | 1.5933267 | gold2  | O+S+ |
| XS_VLDL_P  | 0.018332 | 0.00885  | -0.03424 | 0.031029 | 0.037321 | 0.048535 | 50.25964 | 5.2106402 | 1         | grey60 | ns   |
| XS_VLDL_PL | 0.012231 | 0.00746  | -0.0251  | 0.021051 | 0.028198 | 0.035189 | 53.25711 | 2.232275  | 0.005858  | purple | H+O+ |
| XS_VLDL_CE | 0.095767 | -0.01542 | -0.08958 | 0.14827  | 0.064225 | 0.161583 | 23.42029 | 0.251239  | 0.56074   | grey60 | ns   |
| XS_VLDL_FC | 0.034389 | 0.003647 | -0.04547 | 0.055302 | 0.042539 | 0.06977  | 37.56829 | 8.583169  | 2.6111465 | purple | H+O+ |
| XS_VLDL_TG | -0.08368 | 0.035305 | 0.046661 | -0.12467 | -0.00983 | 0.125055 | 184.5105 | 30.92916  | 1.1771762 | gold2  | O+S+ |
| IDL_P      | 0.040166 | 0.004791 | -0.05388 | 0.064712 | 0.050814 | 0.082278 | 38.14007 | 1.1369420 | 1         | grey60 | ns   |
| IDL_PL     | 0.113756 | -0.02309 | -0.0995  | 0.175051 | 0.066169 | 0.187139 | 20.70663 | 64.20008  | 6.3084200 | purple | H+O+ |
| IDL_CE     | 0.121077 | -0.02052 | -0.11179 | 0.187228 | 0.079043 | 0.203229 | 22.88827 | 75.92295  | 1.1941133 | purple | H+O+ |
| IDL_FC     | 0.116534 | -0.02067 | -0.10626 | 0.179996 | 0.074127 | 0.194662 | 22.383   | 69.47011  | 3.3875837 | purple | H+O+ |
| IDL_TG     | -0.04189 | 0.017568 | 0.023503 | -0.06242 | -0.00514 | 0.062633 | 184.7072 | 7.769908  | 1.6986034 | gold2  | O+S+ |
| L_LDL_P    | 0.019577 | 0.006561 | -0.03238 | 0.032488 | 0.033727 | 0.046829 | 46.07228 | 4.1489095 | 0.99999   | grey60 | ns   |
| L_LDL_PL   | 0.043703 | 0.00399  | -0.05686 | 0.070136 | 0.052695 | 0.087726 | 36.91827 | 13.81361  | 1.5359938 | purple | H+O+ |
| L_LDL_CE   | 0.0579   | -0.00162 | -0.06533 | 0.091372 | 0.055176 | 0.106739 | 31.1264  | 20.52587  | 2.9794020 | purple | H+O+ |
| L_LDL_FC   | 0.095515 | -0.01568 | -0.08891 | 0.147812 | 0.063421 | 0.160844 | 23.22253 | 47.56193  | 2.7420294 | purple | H+O+ |
| L_LDL_TG   | -0.05444 | 0.021478 | 0.03251  | -0.08143 | -0.00955 | 0.08199  | 186.6918 | 13.34569  | 4.5114219 | gold2  | O+S+ |
| M_LDL_P    | -0.04543 | 0.037976 | -0.00191 | -0.06346 | 0.034546 | 0.072256 | 151.4379 | 6.1484939 | 0.999986  | grey60 | ns   |
| M_LDL_PL   | -0.0357  | 0.03099  | -0.00317 | -0.04961 | 0.029583 | 0.05776  | 149.191  | 7.289648  | 5.1327724 | gold2  | O+S+ |
| M_LDL_CE   | -0.05422 | 0.04078  | 0.004299 | -0.07676 | 0.031593 | 0.083012 | 157.6297 | 14.83395  | 1.4657191 | gold2  | O+S+ |
| M_LDL_FC   | 0.026733 | 0.009219 | -0.0446  | 0.044423 | 0.046607 | 0.064386 | 46.3745  | 6.774085  | 1.6823446 | purple | H+O+ |
| M_LDL_TG   | -0.09688 | 0.035879 | 0.061255 | -0.14545 | -0.02198 | 0.147102 | 188.5918 | 42.12485  | 7.5015429 | gold2  | O+S+ |
| S_LDL_P    | -0.03909 | 0.029435 | 0.003049 | -0.05533 | 0.02285  | 0.059867 | 157.562  | 1.0591922 | 1         | grey60 | ns   |
| S_LDL_PL   | 0.008409 | 0.011245 | -0.02612 | 0.015845 | 0.032356 | 0.036028 | 63.90946 | 2.362595  | 0.004339  | purple | H+O+ |
| S_LDL_CE   | -0.04445 | 0.032912 | 0.004273 | -0.06304 | 0.024802 | 0.067746 | 158.524  | 9.930178  | 1.1744170 | gold2  | O+S+ |
| S_LDL_FC   | 0.036224 | 0.00443  | -0.04875 | 0.058385 | 0.046057 | 0.074364 | 38.26821 | 9.832317  | 1.4712367 | purple | H+O+ |
| S_LDL_TG   | -0.13012 | 0.050101 | 0.079496 | -0.19492 | -0.02546 | 0.196573 | 187.441  | 0.951056  | 0.111929  | grey60 | ns   |
| XL_HDL_P   | 0.271491 | -0.10217 | -0.1693  | 0.407224 | 0.058141 | 0.411354 | 8.125449 | 2.5642648 | 0.999999  | grey60 | ns   |
| XL_HDL_PL  | 0.274037 | -0.10511 | -0.16801 | 0.410597 | 0.054475 | 0.414195 | 7.557455 | 306.3267  | 4.7129627 | purple | H+O+ |
| XL_HDL_CE  | 0.285034 | -0.10731 | -0.17767 | 0.427527 | 0.060931 | 0.431847 | 8.111137 | Inf       | 0         | purple | H+O+ |

|            |          |          |          |          |          |          |          |           |           |        |      |
|------------|----------|----------|----------|----------|----------|----------|----------|-----------|-----------|--------|------|
| XL_HDL_FC  | 0.243205 | -0.09351 | -0.14878 | 0.36435  | 0.047862 | 0.36748  | 7.483619 | 23.21686  | 6.0693700 | purple | H+O+ |
| XL_HDL_TG  | 0.028404 | -0.00851 | -0.02088 | 0.043095 | 0.010713 | 0.044406 | 13.95997 | 1.287689  | 0.05156   | grey60 | ns   |
| L_HDL_P    | 0.289574 | -0.10537 | -0.1858  | 0.435156 | 0.069656 | 0.440696 | 9.094241 | 0.006448  | 0.985262  | grey60 | ns   |
| L_HDL_PL   | 0.282786 | -0.10142 | -0.18358 | 0.425287 | 0.071158 | 0.431199 | 9.498666 | Inf       | 0         | purple | H+O+ |
| L_HDL_CE   | 0.291285 | -0.10743 | -0.1848  | 0.437403 | 0.067003 | 0.442505 | 8.709136 | Inf       | 0         | purple | H+O+ |
| L_HDL_FC   | 0.287891 | -0.10477 | -0.18469 | 0.432623 | 0.069215 | 0.438125 | 9.089678 | 234.4855  | 3.2693707 | purple | H+O+ |
| L_HDL_TG   | 0.094554 | -0.02845 | -0.06929 | 0.143426 | 0.035371 | 0.147723 | 13.85379 | 2.49386   | 0.003207  | purple | H+O+ |
| M_HDL_P    | 0.21337  | -0.0644  | -0.15608 | 0.32361  | 0.07939  | 0.333206 | 13.78396 | 0.000174  | 0.9996    | grey60 | ns   |
| M_HDL_PL   | 0.175032 | -0.04843 | -0.1344  | 0.26645  | 0.074453 | 0.276656 | 15.61165 | 122.3614  | 4.3515994 | purple | H+O+ |
| M_HDL_CE   | 0.22512  | -0.07087 | -0.16044 | 0.340775 | 0.077569 | 0.349492 | 12.8234  | 210.9981  | 1.0042742 | purple | H+O+ |
| M_HDL_FC   | 0.233465 | -0.07191 | -0.16869 | 0.353764 | 0.083818 | 0.363558 | 13.32942 | 30.94825  | 1.1265381 | purple | H+O+ |
| M_HDL_TG   | -0.08326 | 0.041981 | 0.036493 | -0.1225  | 0.004753 | 0.122587 | 177.7781 | 4.655038  | 2.2128994 | gold2  | O+S+ |
| S_HDL_P    | -0.01828 | 0.030777 | -0.02322 | -0.02206 | 0.046764 | 0.051704 | 115.2509 | 7.7902880 | 0.999998  | grey60 | ns   |
| S_HDL_PL   | -0.00565 | 0.025803 | -0.03077 | -0.00316 | 0.048997 | 0.049099 | 93.69463 | 4.821581  | 1.5080616 | red    | O+   |
| S_HDL_CE   | -0.01336 | 0.027408 | -0.02409 | -0.01502 | 0.044597 | 0.047059 | 108.6133 | 2.764977  | 0.001718  | red    | O+   |
| S_HDL_FC   | 0.071957 | -0.00326 | -0.07937 | 0.113274 | 0.065908 | 0.131053 | 30.19266 | 2.563214  | 0.002734  | purple | H+O+ |
| S_HDL_TG   | -0.18125 | 0.073109 | 0.105923 | -0.27077 | -0.02842 | 0.272252 | 185.9914 | 1.627791  | 0.023562  | gold2  | O+S+ |
| XXL_VLDL_C | -0.18503 | 0.069266 | 0.115906 | -0.27761 | -0.04039 | 0.280536 | 188.2783 | 3.623626  | 0.000238  | gold2  | O+S+ |
| XL_VLDL_C  | -0.17045 | 0.072096 | 0.094764 | -0.25388 | -0.01963 | 0.254634 | 184.4216 | 0.304239  | 0.496319  | grey60 | ns   |
| L_VLDL_C   | -0.15998 | 0.070976 | 0.084151 | -0.23754 | -0.01141 | 0.237813 | 182.7501 | 0.198809  | 0.632691  | grey60 | ns   |
| M_VLDL_C   | 0.013303 | 0.012462 | -0.0336  | 0.023872 | 0.03989  | 0.046488 | 59.10174 | 0.11212   | 0.772467  | grey60 | ns   |
| S_VLDL_C   | -0.06542 | 0.038882 | 0.020131 | -0.09493 | 0.016239 | 0.096305 | 170.2924 | 0         | 1         | grey60 | ns   |
| XS_VLDL_C  | 0.07855  | -0.0099  | -0.07746 | 0.122231 | 0.058512 | 0.135514 | 25.58044 | 0.287217  | 0.516158  | grey60 | ns   |
| IDL_C      | 0.120123 | -0.02027 | -0.11102 | 0.18577  | 0.07859  | 0.20171  | 22.93082 | 75.39877  | 3.9923282 | purple | H+O+ |
| L_LDL_C    | 0.068664 | -0.00549 | -0.07229 | 0.107557 | 0.057854 | 0.122129 | 28.27556 | 27.0689   | 8.5329271 | purple | H+O+ |
| M_LDL_C    | -0.03328 | 0.033024 | -0.00895 | -0.04531 | 0.036348 | 0.058092 | 141.2658 | 7.495484  | 3.1953345 | red    | O+   |
| S_LDL_C    | -0.02328 | 0.026321 | -0.01092 | -0.03098 | 0.032255 | 0.044721 | 133.8434 | 0.543732  | 0.285935  | grey60 | ns   |
| XL_HDL_C   | 0.275972 | -0.10377 | -0.17222 | 0.413964 | 0.059282 | 0.418187 | 8.149713 | 5.681276  | 2.0831685 | purple | H+O+ |
| L_HDL_C    | 0.291026 | -0.10702 | -0.1851  | 0.437085 | 0.067616 | 0.442284 | 8.793869 | Inf       | 0         | purple | H+O+ |
| M_HDL_C    | 0.227843 | -0.07141 | -0.16285 | 0.344969 | 0.079191 | 0.353942 | 12.92882 | 231.0615  | 8.6804377 | purple | H+O+ |
| S_HDL_C    | 0.008555 | 0.020576 | -0.0398  | 0.018169 | 0.05229  | 0.055357 | 70.83974 | 1.669123  | 0.021423  | purple | H+O+ |

|            |          |          |          |          |          |          |          |           |           |        |      |
|------------|----------|----------|----------|----------|----------|----------|----------|-----------|-----------|--------|------|
| XXL_VLDL_L | -0.18336 | 0.068902 | 0.11448  | -0.27505 | -0.03947 | 0.277865 | 188.1668 | 88.8123   | 1.5406263 | gold2  | O+S+ |
| XL_VLDL_L  | -0.18765 | 0.077213 | 0.107461 | -0.27999 | -0.0262  | 0.281211 | 185.345  | 158.989   | 1.0256544 | gold2  | O+S+ |
| L_VLDL_L   | -0.17685 | 0.076461 | 0.095929 | -0.26305 | -0.01686 | 0.263587 | 183.6672 | 5.23131   | 5.8706973 | gold2  | O+S+ |
| M_VLDL_L   | -0.09605 | 0.05204  | 0.036872 | -0.14051 | 0.013136 | 0.14112  | 174.6591 | 40.27248  | 5.3397975 | gold2  | O+S+ |
| S_VLDL_L   | -0.10425 | 0.051867 | 0.046709 | -0.15354 | 0.004467 | 0.153608 | 178.3335 | 46.50443  | 3.1301556 | gold2  | O+S+ |
| XS_VLDL_L  | 0.027778 | 0.005031 | -0.03975 | 0.045138 | 0.038783 | 0.059512 | 40.66958 | 6.288876  | 5.1419047 | purple | H+O+ |
| IDL_L      | 0.111262 | -0.02032 | -0.1006  | 0.171722 | 0.069528 | 0.185264 | 22.04245 | 63.06478  | 8.6142265 | purple | H+O+ |
| L_LDL_L    | 0.056806 | -0.00262 | -0.06259 | 0.089413 | 0.05194  | 0.103404 | 30.1521  | 19.33544  | 4.6191282 | purple | H+O+ |
| M_LDL_L    | -0.03884 | 0.032448 | -0.00161 | -0.05426 | 0.029498 | 0.061757 | 151.468  | 8.32618   | 4.7186759 | gold2  | O+S+ |
| S_LDL_L    | -0.02472 | 0.025427 | -0.00794 | -0.03346 | 0.028899 | 0.044214 | 139.1855 | 4.365242  | 4.3127828 | red    | O+   |
| XL_HDL_L   | 0.272862 | -0.10376 | -0.16859 | 0.409039 | 0.056148 | 0.412875 | 7.816011 | 296.5947  | 2.5426741 | purple | H+O+ |
| L_HDL_L    | 0.287309 | -0.10422 | -0.18481 | 0.431824 | 0.069787 | 0.437427 | 9.180226 | Inf       | 0         | purple | H+O+ |
| M_HDL_L    | 0.196191 | -0.05727 | -0.14633 | 0.297992 | 0.077133 | 0.307813 | 14.51207 | 176.0682  | 8.5464418 | purple | H+O+ |
| S_HDL_L    | -0.02079 | 0.029805 | -0.01888 | -0.02625 | 0.042162 | 0.049667 | 121.9082 | 5.444895  | 3.5900860 | red    | O+   |
| VLDL_CE    | -0.05069 | 0.033096 | 0.011299 | -0.07289 | 0.018877 | 0.075291 | 165.4798 | 11.74117  | 1.8147889 | gold2  | O+S+ |
| VLDL_FC    | -0.10781 | 0.052108 | 0.050514 | -0.15912 | 0.00138  | 0.159125 | 179.5032 | 50.53091  | 2.9450599 | gold2  | O+S+ |
| VLDL_C     | -0.07565 | 0.041628 | 0.028111 | -0.11052 | 0.011706 | 0.111137 | 173.9538 | 24.87487  | 1.3339074 | gold2  | O+S+ |
| VLDL_PL    | -0.12381 | 0.055853 | 0.063794 | -0.18364 | -0.00688 | 0.183766 | 182.1446 | 66.75642  | 1.7521939 | gold2  | O+S+ |
| VLDL_TG    | -0.17218 | 0.072285 | 0.096518 | -0.25658 | -0.02099 | 0.257438 | 184.6758 | 134.3599  | 4.3664909 | gold2  | O+S+ |
| VLDL_L     | -0.14219 | 0.063301 | 0.07448  | -0.21108 | -0.00968 | 0.2113   | 182.6263 | 89.22271  | 5.9881381 | gold2  | O+S+ |
| VLDL_P     | -0.08333 | 0.043747 | 0.034022 | -0.12222 | 0.008423 | 0.122508 | 176.0578 | 2.3797604 | 0.999999  | grey60 | ns   |
| LDL_CE     | 0.017805 | 0.013581 | -0.04048 | 0.031255 | 0.04682  | 0.056294 | 56.27492 | 5.717488  | 1.9165140 | purple | H+O+ |
| LDL_FC     | 0.071712 | -0.00649 | -0.0744  | 0.112161 | 0.058812 | 0.126645 | 27.67051 | 29.2577   | 5.5245592 | purple | H+O+ |
| LDL_C      | 0.032614 | 0.008677 | -0.05069 | 0.053618 | 0.05141  | 0.074283 | 43.7958  | 9.827007  | 1.4893385 | purple | H+O+ |
| LDL_PL     | 0.015832 | 0.013093 | -0.03747 | 0.02802  | 0.043789 | 0.051986 | 57.38508 | 4.90506   | 1.2443427 | purple | H+O+ |
| LDL_TG     | -0.07646 | 0.029322 | 0.046888 | -0.11457 | -0.01521 | 0.115573 | 187.5639 | 26.70217  | 1.9853032 | gold2  | O+S+ |
| LDL_L      | 0.021964 | 0.010577 | -0.04099 | 0.037171 | 0.044661 | 0.058106 | 50.22906 | 6.055638  | 8.7975620 | purple | H+O+ |
| LDL_P      | -0.00529 | 0.018283 | -0.0203  | -0.00429 | 0.033411 | 0.033685 | 97.31229 | 5.7129998 | 0.999868  | grey60 | ns   |
| HDL_CE     | 0.270277 | -0.09157 | -0.18323 | 0.407677 | 0.079381 | 0.415333 | 11.01846 | 313.6946  | 2.0202688 | purple | H+O+ |
| HDL_FC     | 0.263029 | -0.08649 | -0.18211 | 0.397331 | 0.082808 | 0.405869 | 11.77252 | 264.2371  | 5.7935538 | purple | H+O+ |
| HDL_C      | 0.264552 | -0.08801 | -0.1817  | 0.399406 | 0.081144 | 0.407565 | 11.48399 | 298.2057  | 6.2270994 | purple | H+O+ |



|            |          |          |          |          |          |          |          |          |           |        |      |
|------------|----------|----------|----------|----------|----------|----------|----------|----------|-----------|--------|------|
| HDL_PL     | 0.229795 | -0.07362 | -0.16192 | 0.347564 | 0.076467 | 0.355877 | 12.40782 | 232.4282 | 3.7305320 | purple | H+O+ |
| HDL_TG     | -0.07533 | 0.03618  | 0.035631 | -0.11124 | 0.000475 | 0.111239 | 179.7551 | 23.27008 | 5.3692703 | gold2  | O+S+ |
| HDL_L      | 0.237342 | -0.07716 | -0.16561 | 0.358728 | 0.076598 | 0.366815 | 12.05319 | 243.9805 | 1.0459533 | purple | H+O+ |
| HDL_P      | 0.181756 | -0.04816 | -0.14265 | 0.277164 | 0.081829 | 0.288991 | 16.44856 | 0.022365 | 0.949806  | grey60 | ns   |
| Total_CE   | 0.132032 | -0.02925 | -0.11194 | 0.202625 | 0.071609 | 0.214907 | 19.46366 | 85.59526 | 2.5394556 | purple | H+O+ |
| Total_FC   | 0.081551 | -0.00949 | -0.08156 | 0.127076 | 0.062408 | 0.141574 | 26.15593 | 36.35963 | 4.3688679 | purple | H+O+ |
| Total_C    | 0.112222 | -0.02028 | -0.10178 | 0.173252 | 0.070587 | 0.187079 | 22.16724 | 64.03058 | 9.3199810 | purple | H+O+ |
| Total_PL   | 0.126298 | -0.0306  | -0.10328 | 0.193237 | 0.06294  | 0.203229 | 18.04114 | 76.55441 | 2.7899315 | purple | H+O+ |
| Total_TG   | -0.15672 | 0.065419 | 0.0884   | -0.23363 | -0.0199  | 0.234479 | 184.8689 | 111.7693 | 1.7009846 | gold2  | O+S+ |
| Total_L    | 0.044066 | 0.000392 | -0.05207 | 0.069905 | 0.045433 | 0.083372 | 33.02111 | 12.5489  | 2.8255160 | purple | H+O+ |
| Total_P    | 0.163063 | -0.04301 | -0.12827 | 0.248702 | 0.073833 | 0.25943  | 16.53485 | 0.000928 | 0.997865  | grey60 | ns   |
| PUFA       | 0.109337 | -0.01907 | -0.10016 | 0.168951 | 0.070228 | 0.182966 | 22.57127 | 60.42102 | 3.7929629 | purple | H+O+ |
| Total_FA   | -0.0223  | 0.021791 | -0.0055  | -0.03045 | 0.023636 | 0.038543 | 142.1757 | 3.347306 | 0.000449  | red    | O+   |
| Total_BCAA | -0.12845 | 0.086854 | 0.024301 | -0.18402 | 0.054172 | 0.191832 | 163.5968 | 2.286898 | 0.005165  | gold2  | O+S+ |
| non_HDL_C  | 0.021789 | 0.01251  | -0.04359 | 0.037327 | 0.048581 | 0.061265 | 52.46281 | 6.769268 | 1.7011067 | purple | H+O+ |
| Remnant_C  | 0.01296  | 0.01598  | -0.0383  | 0.024118 | 0.047004 | 0.052831 | 62.8376  | 5.156441 | 6.9752347 | purple | H+O+ |









Supplementary Table 7: Limma differential expression for metabolomics data

## Health-conscious vs Omnivore

|    | metabolite   | logFC    | AveExpr   | t        | P.Value   | adj.P.Val | B        | FC       |
|----|--------------|----------|-----------|----------|-----------|-----------|----------|----------|
| 1  | XL_HDL_CE    | 0.201787 | -9E-17    | 19.17065 | 1.4412065 | 2.4212269 | 174.9204 | 1.150122 |
| 2  | L_HDL_CE     | 0.195874 | -1.2E-16  | 18.9335  | 1.2870510 | 1.0811229 | 170.4539 | 1.145418 |
| 3  | L_HDL_C      | 0.193205 | -5.8E-17  | 18.73533 | 5.2686979 | 2.9504708 | 166.7632 | 1.143301 |
| 4  | XL_HDL_C     | 0.194035 | -1.2E-16  | 18.31125 | 1.3052999 | 5.4822596 | 158.9938 | 1.143958 |
| 5  | L_HDL_P      | 0.188455 | 8.0693581 | 18.21102 | 8.0668586 | 2.7104645 | 157.1832 | 1.139543 |
| 6  | XL_HDL_PL    | 0.189407 | -1.5E-16  | 17.96349 | 6.9526651 | 1.8359416 | 152.7533 | 1.140295 |
| 7  | L_HDL_FC     | 0.18536  | 1.7729533 | 17.95814 | 7.6497569 | 1.8359416 | 152.6583 | 1.137101 |
| 8  | HDL_size     | 0.185031 | -5.8E-15  | 17.83766 | 6.5466088 | 1.3339819 | 150.5244 | 1.136841 |
| 9  | XL_HDL_L     | 0.188242 | 1.5007609 | 17.83273 | 7.1463320 | 1.3339819 | 150.4373 | 1.139375 |
| 10 | XL_HDL_P     | 0.187543 | -4.4E-17  | 17.68135 | 1.0386650 | 1.7449572 | 147.7771 | 1.138823 |
| 11 | L_HDL_L      | 0.180503 | 6.0973373 | 17.64475 | 1.9775369 | 3.0202382 | 147.1371 | 1.133279 |
| 12 | L_HDL_PL     | 0.172965 | -3.5E-17  | 16.85793 | 1.4776518 | 2.0687125 | 133.6977 | 1.127373 |
| 13 | GlycA        | -0.19279 | 5.7501732 | -16.6206 | 7.7545896 | 1.0021315 | 129.7629 | 1.142971 |
| 14 | Unsaturation | 0.185937 | -4.7E-16  | 16.56997 | 1.7929326 | 2.1515191 | 128.9303 | 1.137556 |
| 15 | XL_HDL_FC    | 0.172457 | -2E-16    | 15.86339 | 1.6515472 | 1.8497329 | 117.576  | 1.126976 |
| 16 | HDL_CE       | 0.157851 | -4.6E-16  | 15.17332 | 7.2688845 | 7.6323287 | 106.959  | 1.115624 |
| 17 | DHA          | 0.160168 | 7.1687594 | 14.45414 | 3.0569621 | 3.0209979 | 96.39134 | 1.117417 |
| 18 | S_HDL_TG     | -0.16024 | -1.3E-16  | -14.1096 | 4.1949207 | 3.9152593 | 91.50791 | 1.117475 |
| 19 | XL_VLDL_L    | -0.15871 | 7.7064098 | -14.0916 | 5.4064787 | 4.7804654 | 91.25619 | 1.116291 |
| 20 | XL_VLDL_TG   | -0.15704 | 7.2210866 | -13.9667 | 3.1208493 | 2.6215134 | 89.517   | 1.114999 |
| 21 | HDL_C        | 0.144002 | -3.3E-17  | 13.75016 | 6.2818830 | 5.0255064 | 86.53903 | 1.104966 |
| 22 | HDL_FC       | 0.141699 | -6.4E-18  | 13.66115 | 2.1296926 | 1.6263107 | 85.32811 | 1.103204 |
| 23 | XXL_VLDL_CE  | -0.154   | 4.5534688 | -13.5891 | 5.6891308 | 4.1555390 | 84.35361 | 1.11265  |
| 24 | XXL_VLDL_L   | -0.15248 | 8.5438066 | -13.509  | 1.6858019 | 1.1800613 | 83.27634 | 1.111478 |
| 25 | L_VLDL_PL    | -0.1521  | 9.8460974 | -13.4789 | 2.5316793 | 1.7012885 | 82.87309 | 1.111185 |
| 26 | L_VLDL_L     | -0.15193 | 1.2301678 | -13.4495 | 3.7630881 | 2.4315338 | 82.48004 | 1.111057 |
| 27 | VLDL_TG      | -0.15203 | -2E-16    | -13.4467 | 3.9102856 | 2.4330666 | 82.44199 | 1.111135 |
| 28 | XL_VLDL_P    | -0.15115 | 5.3183668 | -13.4036 | 6.9719508 | 4.1831705 | 81.86856 | 1.110455 |
| 29 | XL_VLDL_PL   | -0.1508  | 6.4972395 | -13.3413 | 1.6067259 | 9.3079293 | 81.0407  | 1.110186 |
| 30 | XXL_VLDL_C   | -0.14969 | 2.4222851 | -13.2139 | 8.7475997 | 4.8986558 | 79.36053 | 1.109333 |
| 31 | XXL_VLDL_TG  | -0.14833 | 4.3822190 | -13.119  | 3.0573699 | 1.6568972 | 78.11992 | 1.108287 |
| 32 | L_VLDL_FC    | -0.14802 | -6.5E-20  | -13.1029 | 3.7772596 | 1.9830613 | 77.91031 | 1.108045 |
| 33 | L_VLDL_TG    | -0.1471  | -9.9E-17  | -13.0251 | 1.0444767 | 5.3173362 | 76.90204 | 1.107338 |
| 34 | XL_VLDL_C    | -0.14662 | 5.3256163 | -12.873  | 7.5147713 | 3.7131811 | 74.94601 | 1.106971 |
| 35 | XL_VLDL_FC   | -0.14592 | -1.6E-17  | -12.8658 | 8.2552696 | 3.9625294 | 74.85286 | 1.106438 |
| 36 | L_VLDL_P     | -0.14342 | 2.4577343 | -12.6725 | 9.7956226 | 4.5712905 | 72.40132 | 1.104521 |
| 37 | XXL_VLDL_PL  | -0.14189 | -6.1E-17  | -12.5514 | 4.5288816 | 2.0563570 | 70.88412 | 1.103353 |
| 38 | Total_TG     | -0.1427  | 1.2565476 | -12.5199 | 6.7259224 | 2.9735657 | 70.49225 | 1.103971 |
| 39 | XL_VLDL_CE   | -0.1426  | 1.7860660 | -12.4501 | 1.6118755 | 6.9434636 | 69.62629 | 1.103892 |
| 40 | XXL_VLDL_P   | -0.1404  | -3.2E-17  | -12.3888 | 3.4583815 | 1.4525202 | 68.86998 | 1.102211 |
| 41 | XXL_VLDL_FC  | -0.14047 | -7.4E-17  | -12.3835 | 3.6941482 | 1.5136997 | 68.80464 | 1.102266 |
| 42 | L_VLDL_C     | -0.13994 | -5.3E-17  | -12.2697 | 1.5067127 | 6.0268511 | 67.41205 | 1.101861 |
| 43 | VLDL_L       | -0.13594 | 1.0713500 | -11.8451 | 2.5654057 | 1.0022980 | 62.32433 | 1.09881  |
| 44 | M_VLDL_TG    | -0.13407 | 2.3406861 | -11.7667 | 6.4960919 | 2.4803260 | 61.40448 | 1.097386 |

|    |            |          |           |          |           |           |          |          |
|----|------------|----------|-----------|----------|-----------|-----------|----------|----------|
| 45 | MUFA       | -0.13244 | 3.4142440 | -11.4128 | 3.9937603 | 1.4910038 | 57.32779 | 1.096143 |
| 46 | L_VLDL_CE  | -0.12589 | 1.3212552 | -10.927  | 9.3291438 | 3.4071655 | 51.93281 | 1.091181 |
| 47 | VLDL_PL    | -0.12298 | 7.3491816 | -10.651  | 1.8629922 | 6.6592062 | 48.9724  | 1.088978 |
| 48 | M_HDL_C    | 0.111648 | -2.3E-16  | 10.48995 | 1.0329580 | 3.6153530 | 47.27949 | 1.080462 |
| 49 | M_HDL_CE   | 0.111948 | -2.2E-16  | 10.47349 | 1.2287988 | 4.2130246 | 47.10793 | 1.080686 |
| 50 | M_HDL_FC   | 0.109744 | 1.4129149 | 10.41885 | 2.1826881 | 7.3338323 | 46.54021 | 1.079037 |
| 51 | M_HDL_TG   | -0.12108 | 1.2682950 | -10.3988 | 2.6922827 | 8.8686960 | 46.33287 | 1.08755  |
| 52 | VLDL_size  | -0.11681 | -1.9E-15  | -10.3114 | 6.6975277 | 2.1638166 | 45.43244 | 1.084332 |
| 53 | S_VLDL_TG  | -0.11678 | -2.3E-16  | -10.2221 | 1.6858258 | 5.3437498 | 44.52054 | 1.08431  |
| 54 | HDL_L      | 0.10619  | -2E-16    | 9.94866  | 2.7106400 | 8.4331022 | 41.77764 | 1.076382 |
| 55 | HDL_PL     | 0.103504 | -3.5E-16  | 9.79621  | 1.2352995 | 3.7732785 | 40.28044 | 1.07438  |
| 56 | VLDL_FC    | -0.11259 | 7.4027796 | -9.71106 | 2.8533600 | 8.5600802 | 39.45423 | 1.08117  |
| 57 | ApoA1      | 0.101954 | 3.3953703 | 9.626509 | 6.5063186 | 1.9176518 | 38.64089 | 1.073226 |
| 58 | Gly        | 0.105817 | -1.9E-16  | 9.57847  | 1.0359992 | 3.0008253 | 38.18196 | 1.076103 |
| 59 | SFA        | -0.10965 | -2.3E-16  | -9.45078 | 3.5284345 | 1.0047067 | 36.97314 | 1.07897  |
| 60 | S_VLDL_L   | -0.10769 | -1.1E-16  | -9.31625 | 1.2610430 | 3.5309205 | 35.71716 | 1.077498 |
| 61 | Leu        | -0.10266 | -2.2E-16  | -9.12792 | 7.2807983 | 2.0052034 | 33.98887 | 1.07375  |
| 62 | S_LDL_TG   | -0.10486 | -1.1E-16  | -9.12477 | 7.4950564 | 2.0309185 | 33.96029 | 1.07539  |
| 63 | HDL_TG     | -0.10524 | 4.3909897 | -9.05009 | 1.4873873 | 3.9663663 | 33.28493 | 1.075676 |
| 64 | Total_BCAA | -0.1025  | -2E-16    | -9.04759 | 1.5217968 | 3.9947168 | 33.2624  | 1.07363  |
| 65 | M_VLDL_L   | -0.10435 | 1.5944468 | -8.98841 | 2.6089738 | 6.7431938 | 32.73129 | 1.075011 |
| 66 | S_VLDL_P   | -0.10224 | -7.3E-17  | -8.85668 | 8.5549754 | 2.1776301 | 31.56156 | 1.07344  |
| 67 | M_HDL_P    | 0.09312  | -1.8E-16  | 8.713002 | 3.0640362 | 7.6829566 | 30.30538 | 1.066675 |
| 68 | Albumin    | 0.100748 | 2.2343148 | 8.641204 | 5.7527360 | 1.4212641 | 29.68532 | 1.072329 |
| 69 | Val        | -0.09758 | 1.0272672 | -8.59527 | 8.5856117 | 2.0904098 | 29.29125 | 1.069979 |
| 70 | VLDL_C     | -0.09742 | 3.5231299 | -8.35035 | 7.0094116 | 1.6822587 | 27.22568 | 1.069861 |
| 71 | VLDL_P     | -0.09584 | 3.4645858 | -8.23744 | 1.8090795 | 4.2806388 | 26.2935  | 1.068686 |
| 72 | S_VLDL_CE  | -0.09587 | -2.1E-16  | -8.23326 | 1.8732372 | 4.3708868 | 26.25924 | 1.068709 |
| 73 | XS_VLDL_TG | -0.09165 | -3.7E-16  | -7.91158 | 2.6026306 | 5.9896157 | 23.67406 | 1.06559  |
| 74 | Creatinine | -0.08258 | -1E-16    | -7.76783 | 8.1626461 | 1.8531412 | 22.55207 | 1.058911 |
| 75 | M_VLDL_P   | -0.08815 | 1.1477390 | -7.5587  | 4.1528667 | 9.3024215 | 20.95634 | 1.063004 |
| 76 | S_HDL_PL   | -0.08461 | -4.6E-16  | -7.27463 | 3.5336360 | 7.8111954 | 18.85837 | 1.060397 |
| 77 | S_VLDL_C   | -0.08431 | 2.4576191 | -7.22392 | 5.1358215 | 1.1205428 | 18.49228 | 1.060179 |
| 78 | Ile        | -0.08289 | -3.1E-17  | -7.20698 | 5.8158307 | 1.2526404 | 18.37056 | 1.059138 |
| 79 | M_VLDL_PL  | -0.08358 | 1.7384725 | -7.15542 | 8.4764321 | 1.8025830 | 18.00185 | 1.059641 |
| 80 | M_LDL_TG   | -0.0825  | 1.1059306 | -7.1406  | 9.4414204 | 1.9826982 | 17.89634 | 1.058854 |
| 81 | Omega_3    | 0.08001  | 1.5143020 | 7.131222 | 1.0106630 | 2.0779678 | 17.82972 | 1.057025 |
| 82 | VLDL_CE    | -0.08342 | -1E-16    | -7.13073 | 1.0142461 | 2.0779678 | 17.82625 | 1.059526 |
| 83 | S_HDL_L    | -0.08305 | 4.0575449 | -7.10948 | 1.1831494 | 2.3948085 | 17.67554 | 1.059253 |
| 84 | S_VLDL_PL  | -0.08237 | 1.3901784 | -7.06593 | 1.6199548 | 3.2399096 | 17.36814 | 1.058754 |
| 85 | M_HDL_L    | 0.07544  | -2.7E-16  | 7.015137 | 2.3315333 | 4.6082071 | 17.012   | 1.053683 |
| 86 | LDL_TG     | -0.07855 | -1.7E-17  | -6.77857 | 1.2295274 | 2.4018676 | 15.38704 | 1.055953 |
| 87 | M_LDL_CE   | -0.0756  | -3E-16    | -6.46827 | 1.0020679 | 1.9350277 | 13.33992 | 1.053797 |
| 88 | Gln        | 0.073748 | -4.3E-16  | 6.299357 | 3.0180422 | 5.7617170 | 12.26581 | 1.052447 |
| 89 | HDL_P      | 0.06812  | -7.3E-17  | 6.227661 | 4.7787420 | 9.0205468 | 11.81847 | 1.048349 |
| 90 | Total_FA   | -0.07146 | 1.0603077 | -6.16288 | 7.2075849 | 1.3454158 | 11.41865 | 1.050779 |
| 91 | S_HDL_P    | -0.06992 | -2.3E-17  | -5.96894 | 2.4068396 | 4.4433962 | 10.24674 | 1.049661 |
| 92 | M_LDL_P    | -0.06932 | 1.9975603 | -5.92805 | 3.0891978 | 5.6411439 | 10.00438 | 1.049222 |

|     |               |          |           |          |           |           |          |          |
|-----|---------------|----------|-----------|----------|-----------|-----------|----------|----------|
| 93  | L_LDL_TG      | -0.06827 | 2.1863235 | -5.88496 | 4.0112401 | 7.2461112 | 9.750853 | 1.048457 |
| 94  | IDL_TG        | -0.06765 | -2.6E-16  | -5.83002 | 5.5820048 | 9.9763491 | 9.43024  | 1.048011 |
| 95  | M_VLDL_FC     | -0.06673 | -1.4E-16  | -5.70284 | 1.1860706 | 2.0974723 | 8.699581 | 1.047338 |
| 96  | Total_P       | 0.057823 | -5.6E-16  | 5.224126 | 1.7580381 | 3.0765667 | 6.093628 | 1.040894 |
| 97  | S_LDL_CE      | -0.06007 | 5.6499773 | -5.13232 | 2.8745001 | 4.9785156 | 5.619932 | 1.042518 |
| 98  | S_VLDL_FC     | -0.05997 | 9.2305629 | -5.12527 | 2.9840591 | 5.1155300 | 5.583916 | 1.042446 |
| 99  | M_LDL_L       | -0.059   | 1.4161511 | -5.04205 | 4.6246148 | 7.8478312 | 5.162334 | 1.041742 |
| 100 | M_HDL_PL      | 0.054469 | -4.5E-16  | 5.016158 | 5.2927139 | 8.8917594 | 5.032578 | 1.038477 |
| 101 | M_LDL_C       | -0.05816 | -1.2E-16  | -4.96728 | 6.8160446 | 1.1337579 | 4.789468 | 1.041135 |
| 102 | S_HDL_CE      | -0.05764 | 4.9696560 | -4.9091  | 9.1836229 | 1.5125967 | 4.503131 | 1.040762 |
| 103 | Phosphatidylc | 0.053531 | 3.6137649 | 4.907068 | 9.2789701 | 1.5134630 | 4.493215 | 1.037802 |
| 104 | S_LDL_P       | -0.05568 | 2.8481904 | -4.76168 | 1.9262153 | 3.1115786 | 3.792792 | 1.039351 |
| 105 | XS_VLDL_PL    | -0.0523  | -2.3E-16  | -4.52255 | 6.1263467 | 9.8021548 | 2.686555 | 1.03692  |
| 106 | Acetone       | 0.052833 | 4.8684887 | 4.506079 | 6.6212441 | 1.0494047 | 2.612443 | 1.0373   |
| 107 | M_LDL_PL      | -0.0519  | -3.1E-16  | -4.43132 | 9.3893109 | 1.4742095 | 2.279491 | 1.036628 |
| 108 | Tyr           | -0.05067 | -1E-16    | -4.35125 | 1.3567705 | 2.1105319 | 1.929096 | 1.035743 |
| 109 | Cholines      | 0.047315 | 7.7621062 | 4.324113 | 1.5349526 | 2.3657985 | 1.811767 | 1.03334  |
| 110 | Sphingomyelin | 0.046531 | 2.3502380 | 4.280391 | 1.8697390 | 2.8556014 | 1.624295 | 1.032779 |
| 111 | XS_VLDL_P     | -0.04926 | -4.1E-19  | -4.26025 | 2.0463447 | 3.0971704 | 1.53859  | 1.034733 |
| 112 | S_HDL_C       | -0.04859 | -3.9E-17  | -4.15288 | 3.2895694 | 4.9343541 | 1.08843  | 1.034257 |
| 113 | Remnant_C     | -0.04832 | -2.3E-16  | -4.14208 | 3.4483820 | 5.1267980 | 1.043777 | 1.034057 |
| 114 | XS_VLDL_L     | -0.04762 | -1.9E-16  | -4.13335 | 3.5819435 | 5.2786536 | 1.007795 | 1.033561 |
| 115 | LA            | 0.047654 | 3.1065025 | 4.110807 | 3.9501896 | 5.7707118 | 0.915168 | 1.033583 |
| 116 | Lactate       | -0.04558 | -4.8E-16  | -3.89096 | 0.0001    | 0.000145  | 0.038497 | 1.032098 |
| 117 | Total_CE      | 0.041457 | -3.5E-16  | 3.664437 | 0.000248  | 0.000355  | -0.81445 | 1.029153 |
| 118 | S_LDL_C       | -0.04294 | -2.5E-16  | -3.66304 | 0.00025   | 0.000355  | -0.81953 | 1.030213 |
| 119 | ApoB          | -0.04262 | -1.5E-16  | -3.64115 | 0.000272  | 0.000384  | -0.89924 | 1.02998  |
| 120 | XS_VLDL_FC    | -0.04171 | 2.5723480 | -3.62268 | 0.000292  | 0.000409  | -0.9661  | 1.029336 |
| 121 | S_LDL_L       | -0.04068 | 8.4810774 | -3.47201 | 0.000517  | 0.000718  | -1.49884 | 1.028595 |
| 122 | PUFA          | 0.03722  | -3.4E-16  | 3.268786 | 0.001081  | 0.001489  | -2.18161 | 1.026135 |
| 123 | Phe           | -0.03789 | -8.4E-17  | -3.22794 | 0.001248  | 0.001704  | -2.31386 | 1.026612 |
| 124 | Citrate       | 0.033218 | -2.5E-16  | 2.889642 | 0.003859  | 0.005194  | -3.3454  | 1.023292 |
| 125 | LDL_P         | -0.03384 | -2.1E-16  | -2.88914 | 0.003865  | 0.005194  | -3.34684 | 1.023733 |
| 126 | His           | 0.033442 | -1.1E-16  | 2.865337 | 0.004168  | 0.005557  | -3.41511 | 1.023451 |
| 127 | bOHbutyrate   | 0.033007 | 6.5966249 | 2.813947 | 0.004896  | 0.006477  | -3.56059 | 1.023142 |
| 128 | Phosphoglyc   | 0.030397 | -3E-16    | 2.760877 | 0.005767  | 0.007569  | -3.70806 | 1.021293 |
| 129 | non_HDL_C     | -0.03196 | 5.3692532 | -2.73622 | 0.006217  | 0.008097  | -3.77561 | 1.022402 |
| 130 | M_VLDL_C      | -0.03028 | 2.1030542 | -2.58754 | 0.00967   | 0.012496  | -4.17016 | 1.02121  |
| 131 | L_LDL_FC      | 0.029805 | -1.6E-16  | 2.584761 | 0.009748  | 0.012501  | -4.17732 | 1.020874 |
| 132 | IDL_P         | -0.02831 | -3E-16    | -2.43807 | 0.01477   | 0.018798  | -4.5446  | 1.019817 |
| 133 | IDL_FC        | 0.025854 | -2.3E-16  | 2.278877 | 0.022679  | 0.028648  | -4.9189  | 1.018082 |
| 134 | LDL_PL        | -0.02514 | 8.7788114 | -2.14835 | 0.031692  | 0.039733  | -5.20696 | 1.017575 |
| 135 | Total_PL      | 0.023697 | -9.1E-16  | 2.105596 | 0.035245  | 0.043861  | -5.29762 | 1.016561 |
| 136 | LDL_CE        | -0.02399 | -3.4E-16  | -2.05214 | 0.040162  | 0.049612  | -5.40841 | 1.016766 |
| 137 | IDL_C         | 0.02277  | 2.2016384 | 2.011063 | 0.044325  | 0.054355  | -5.49161 | 1.015908 |
| 138 | IDL_CE        | 0.02239  | 2.2618503 | 1.979549 | 0.047761  | 0.058143  | -5.5543  | 1.015641 |

Health-conscious vs Sweet-tooth



|    | metabolite   | logFC    | AveExpr   | t        | P.Value   | adj.P.Val | B        | FC       |
|----|--------------|----------|-----------|----------|-----------|-----------|----------|----------|
| 1  | DHA          | 0.33743  | 7.1687594 | 27.90099 | 8.8863724 | 1.4929105 | 377.2919 | 1.263504 |
| 2  | Unsaturation | 0.327786 | -4.74E-16 | 26.76472 | 1.6641603 | 1.3978947 | 346.8142 | 1.255085 |
| 3  | L_HDL_CE     | 0.282551 | -1.21E-16 | 25.02469 | 3.2634172 | 1.8275136 | 302.5194 | 1.216344 |
| 4  | L_HDL_C      | 0.28105  | -5.84E-17 | 24.97149 | 1.2127069 | 5.0933691 | 301.2106 | 1.215079 |
| 5  | L_HDL_L      | 0.271547 | 6.0973373 | 24.3217  | 8.9575751 | 3.0097452 | 285.4433 | 1.207102 |
| 6  | XL_HDL_CE    | 0.27824  | -9.00E-17 | 24.22035 | 1.0177374 | 2.8496648 | 283.0205 | 1.212714 |
| 7  | L_HDL_P      | 0.273075 | 8.0693581 | 24.17833 | 2.7795347 | 6.6708833 | 282.0189 | 1.20838  |
| 8  | L_HDL_FC     | 0.27093  | 1.7729533 | 24.05026 | 5.8807452 | 1.2349565 | 278.9764 | 1.206585 |
| 9  | L_HDL_PL     | 0.262642 | -3.55E-17 | 23.45467 | 6.9720474 | 1.3014488 | 265.0347 | 1.199674 |
| 10 | XL_HDL_C     | 0.268722 | -1.19E-16 | 23.23591 | 1.0896040 | 1.8305348 | 259.9993 | 1.20474  |
| 11 | HDL_size     | 0.262816 | -5.82E-15 | 23.21471 | 1.7734868 | 2.7085981 | 259.5137 | 1.199818 |
| 12 | HDL_CE       | 0.258124 | -4.64E-16 | 22.73411 | 9.8644370 | 1.3810211 | 248.6231 | 1.195923 |
| 13 | XL_HDL_L     | 0.259677 | 1.5007609 | 22.53994 | 7.6540662 | 9.8914086 | 244.2861 | 1.197211 |
| 14 | XL_HDL_PL    | 0.258087 | -1.46E-16 | 22.42735 | 9.3869831 | 1.1264379 | 241.7878 | 1.195892 |
| 15 | XL_HDL_P     | 0.257618 | -4.36E-17 | 22.25394 | 4.3527219 | 4.8750485 | 237.9641 | 1.195503 |
| 16 | HDL_C        | 0.245276 | -3.29E-17 | 21.45902 | 1.3059924 | 1.3712920 | 220.8069 | 1.185319 |
| 17 | HDL_FC       | 0.240857 | -6.39E-18 | 21.27629 | 6.2697814 | 6.1960193 | 216.9493 | 1.181694 |
| 18 | GlycA        | -0.26547 | 5.7501732 | -20.9701 | 3.8265032 | 3.5714030 | 210.5585 | 1.202028 |
| 19 | XL_HDL_FC    | 0.232105 | -1.99E-16 | 19.56224 | 7.6795150 | 6.7903080 | 182.3384 | 1.174548 |
| 20 | Omega_3      | 0.238945 | 1.5143020 | 19.5135  | 1.9781818 | 1.6616727 | 181.396  | 1.180129 |
| 21 | M_HDL_FC     | 0.207668 | 1.4129149 | 18.06456 | 1.1349487 | 9.0795902 | 154.434  | 1.15482  |
| 22 | M_HDL_C      | 0.207938 | -2.32E-16 | 17.90079 | 2.1291961 | 1.6259315 | 151.5152 | 1.155036 |
| 23 | M_HDL_CE     | 0.206483 | -2.19E-16 | 17.70022 | 7.4497026 | 5.4415219 | 147.9762 | 1.153872 |
| 24 | ApoA1        | 0.198159 | 3.3953703 | 17.14335 | 1.1730470 | 8.2113293 | 138.3567 | 1.147234 |
| 25 | XXL_VLDL_CE  | -0.20884 | 4.5534688 | -16.8852 | 9.3446841 | 6.2796277 | 133.9999 | 1.15576  |
| 26 | XXL_VLDL_L   | -0.20647 | 8.5438066 | -16.7608 | 7.5268160 | 4.8634811 | 131.9238 | 1.153864 |
| 27 | HDL_PL       | 0.192648 | -3.49E-16 | 16.70643 | 1.8636829 | 1.1596249 | 131.0216 | 1.142859 |
| 28 | S_HDL_TG     | -0.20576 | -1.32E-16 | -16.6003 | 1.0848259 | 6.5089558 | 129.2688 | 1.153295 |
| 29 | HDL_L        | 0.193341 | -2.01E-16 | 16.5967  | 1.1523331 | 6.6755854 | 129.2088 | 1.143409 |
| 30 | XXL_VLDL_C   | -0.20506 | 2.4222851 | -16.5856 | 1.3856614 | 7.7597039 | 129.0253 | 1.152735 |
| 31 | XXL_VLDL_PL  | -0.19991 | -6.15E-17 | -16.2026 | 7.2649349 | 3.9371260 | 122.7949 | 1.148629 |
| 32 | XL_VLDL_L    | -0.19899 | 7.7064098 | -16.1878 | 9.2193079 | 4.8401366 | 122.5579 | 1.147892 |
| 33 | XL_VLDL_TG   | -0.1986  | 7.2210866 | -16.1834 | 9.8999637 | 5.0399815 | 122.487  | 1.147583 |
| 34 | XXL_VLDL_TG  | -0.19944 | 4.3822190 | -16.162  | 1.3993810 | 6.9145887 | 122.1427 | 1.148252 |
| 35 | M_HDL_P      | 0.18536  | -1.76E-16 | 15.89123 | 1.0624701 | 5.0998568 | 117.8356 | 1.137101 |
| 36 | XXL_VLDL_FC  | -0.19596 | -7.42E-17 | -15.8286 | 2.8609509 | 1.3351104 | 116.8503 | 1.145488 |
| 37 | XL_VLDL_P    | -0.19468 | 5.3183668 | -15.8176 | 3.4037800 | 1.5455001 | 116.6775 | 1.144466 |
| 38 | XL_VLDL_PL   | -0.19387 | 6.4972395 | -15.7154 | 1.7006552 | 7.5186864 | 115.0774 | 1.14383  |
| 39 | XXL_VLDL_P   | -0.19423 | -3.16E-17 | -15.7034 | 2.0521475 | 8.8400202 | 114.8905 | 1.144113 |
| 40 | L_VLDL_PL    | -0.19097 | 9.8460974 | -15.5067 | 4.3975749 | 1.8469814 | 111.8424 | 1.141534 |
| 41 | VLDL_TG      | -0.18582 | -2.03E-16 | -15.0587 | 4.1035934 | 1.6814724 | 105.0421 | 1.137465 |
| 42 | XL_VLDL_FC   | -0.18528 | -1.59E-17 | -14.9676 | 1.6081440 | 6.4325760 | 103.6842 | 1.137036 |
| 43 | L_VLDL_FC    | -0.18228 | -6.48E-20 | -14.7845 | 2.4461179 | 9.5569260 | 100.978  | 1.134674 |
| 44 | L_VLDL_L     | -0.18182 | 1.2301678 | -14.7473 | 4.2372294 | 1.6178512 | 100.4319 | 1.134313 |
| 45 | Albumin      | 0.184952 | 2.2343148 | 14.53494 | 9.4802231 | 3.5392832 | 97.34254 | 1.136779 |
| 46 | L_VLDL_P     | -0.17832 | 2.4577343 | -14.4364 | 3.9481997 | 1.4419512 | 95.92456 | 1.131563 |
| 47 | XL_VLDL_C    | -0.17929 | 5.3256163 | -14.4233 | 4.7687568 | 1.7045768 | 95.73689 | 1.132325 |

|    |               |          |           |          |           |           |          |          |
|----|---------------|----------|-----------|----------|-----------|-----------|----------|----------|
| 48 | M_HDL_L       | 0.167501 | -2.74E-16 | 14.27147 | 4.2137162 | 1.4748006 | 93.57146 | 1.123111 |
| 49 | L_VLDL_TG     | -0.17445 | -9.91E-17 | -14.1535 | 2.2553815 | 7.7327367 | 91.90439 | 1.128532 |
| 50 | Total_TG      | -0.1758  | 1.2565476 | -14.132  | 3.0535737 | 1.0260007 | 91.6033  | 1.12959  |
| 51 | HDL_P         | 0.16189  | -7.31E-17 | 13.56099 | 8.3364121 | 2.7461122 | 83.7427  | 1.118752 |
| 52 | XL_VLDL_CE    | -0.1667  | 1.7860660 | -13.3358 | 1.7289258 | 5.5857603 | 80.73131 | 1.122491 |
| 53 | MUFA          | -0.16851 | 3.4142440 | -13.3052 | 2.5995223 | 8.2399953 | 80.3263  | 1.123895 |
| 54 | VLDL_size     | -0.16381 | -1.90E-15 | -13.2497 | 5.4400707 | 1.6924664 | 79.59296 | 1.120242 |
| 55 | L_VLDL_C      | -0.164   | -5.35E-17 | -13.1747 | 1.4668982 | 4.4807073 | 78.60796 | 1.120388 |
| 56 | VLDL_L        | -0.15614 | 1.0713500 | -12.4654 | 1.3317864 | 3.9953592 | 69.56119 | 1.114298 |
| 57 | Phosphatidylc | 0.147852 | 3.6137649 | 12.41839 | 2.3927361 | 7.0522748 | 68.97979 | 1.107919 |
| 58 | M_VLDL_TG     | -0.15297 | 2.3406861 | -12.3007 | 1.0283668 | 2.9787178 | 67.53303 | 1.111853 |
| 59 | M_HDL_PL      | 0.141454 | -4.54E-16 | 11.93598 | 8.6718867 | 2.4692830 | 63.13399 | 1.103016 |
| 60 | Total_P       | 0.141222 | -5.62E-16 | 11.69043 | 1.5946377 | 4.4649857 | 60.24666 | 1.102839 |
| 61 | S_LDL_TG      | -0.14643 | -1.05E-16 | -11.675  | 1.9109467 | 5.2629351 | 60.06725 | 1.106827 |
| 62 | Sphingomyelin | 0.138372 | 2.3502380 | 11.66295 | 2.2006317 | 5.9630020 | 59.92732 | 1.100663 |
| 63 | S_VLDL_TG     | -0.14436 | -2.28E-16 | -11.5785 | 5.8980070 | 1.5728018 | 58.94993 | 1.105241 |
| 64 | Cholines      | 0.135673 | 7.7621062 | 11.36076 | 7.2420143 | 1.9010287 | 56.46413 | 1.098605 |
| 65 | VLDL_PL       | -0.14109 | 7.3491816 | -11.1962 | 4.6730057 | 1.2077922 | 54.61651 | 1.102734 |
| 66 | L_VLDL_CE     | -0.1382  | 1.3212552 | -10.991  | 4.6088514 | 1.1731621 | 52.34903 | 1.100532 |
| 67 | M_HDL_TG      | -0.12655 | 1.2682950 | -9.95826 | 2.4618030 | 6.1728792 | 41.5747  | 1.09168  |
| 68 | Creatinine    | -0.1138  | -9.99E-17 | -9.80783 | 1.1013449 | 2.7209698 | 40.0934  | 1.082074 |
| 69 | Phosphoglyc   | 0.11719  | -3.02E-16 | 9.752598 | 1.8983771 | 4.6221355 | 39.5552  | 1.08462  |
| 70 | Total_CE      | 0.119767 | -3.48E-16 | 9.699743 | 3.1875114 | 7.6500273 | 39.04297 | 1.086559 |
| 71 | M_LDL_TG      | -0.12165 | 1.1059306 | -9.64699 | 5.3321978 | 1.2617031 | 38.53448 | 1.087979 |
| 72 | VLDL_FC       | -0.12111 | 7.4027796 | -9.57046 | 1.1192771 | 2.6116466 | 37.80176 | 1.087568 |
| 73 | XS_VLDL_TG    | -0.11701 | -3.67E-16 | -9.25464 | 2.2464720 | 5.1699629 | 34.83934 | 1.084484 |
| 74 | IDL_CE        | 0.113492 | 2.2618503 | 9.193796 | 3.9587679 | 8.9874732 | 34.27998 | 1.081844 |
| 75 | IDL_C         | 0.113203 | 2.2016384 | 9.160831 | 5.3728872 | 1.2035267 | 33.97846 | 1.081627 |
| 76 | HDL_TG        | -0.11612 | 4.3909897 | -9.14897 | 5.9954280 | 1.3253051 | 33.87024 | 1.083814 |
| 77 | S_VLDL_P      | -0.11515 | -7.35E-17 | -9.13924 | 6.5588083 | 1.4310127 | 33.78159 | 1.083085 |
| 78 | S_VLDL_L      | -0.11454 | -1.14E-16 | -9.0795  | 1.1362986 | 2.4474124 | 33.23918 | 1.08263  |
| 79 | PUFA          | 0.112245 | -3.40E-16 | 9.032191 | 1.7514918 | 3.7246914 | 32.81217 | 1.080909 |
| 80 | IDL_FC        | 0.108308 | -2.33E-16 | 8.747155 | 2.2666318 | 4.7599268 | 30.28647 | 1.077963 |
| 81 | LDL_TG        | -0.10971 | -1.73E-17 | -8.67533 | 4.2670204 | 8.8501165 | 29.66273 | 1.079012 |
| 82 | L_LDL_FC      | 0.101494 | -1.59E-16 | 8.064744 | 7.5295172 | 1.5426328 | 24.56756 | 1.072884 |
| 83 | M_VLDL_L      | -0.09837 | 1.5944468 | -7.76375 | 8.4295375 | 1.7062196 | 22.19218 | 1.070564 |
| 84 | IDL_L         | 0.095797 | 3.6370159 | 7.735    | 1.0567700 | 2.1135401 | 21.97002 | 1.068655 |
| 85 | Total_C       | 0.096425 | -5.60E-16 | 7.723241 | 1.1588711 | 2.2904747 | 21.87938 | 1.069121 |
| 86 | VLDL_P        | -0.09751 | 3.4645858 | -7.67924 | 1.6345517 | 3.1930777 | 21.54145 | 1.069925 |
| 87 | IDL_PL        | 0.094547 | 1.3736073 | 7.65463  | 1.9795972 | 3.8226704 | 21.35329 | 1.06773  |
| 88 | S_VLDL_CE     | -0.09543 | -2.13E-16 | -7.5095  | 6.0513888 | 1.1552651 | 20.25591 | 1.068386 |
| 89 | L_LDL_TG      | -0.09319 | 2.1863235 | -7.36036 | 1.8672789 | 3.5247512 | 19.15001 | 1.066724 |
| 90 | VLDL_C        | -0.09263 | 3.5231299 | -7.27487 | 3.5273355 | 6.5843596 | 18.52608 | 1.066315 |
| 91 | SFA           | -0.08859 | -2.28E-16 | -6.99625 | 2.6679410 | 4.9254296 | 16.54305 | 1.063334 |
| 92 | Total_PL      | 0.085199 | -9.06E-16 | 6.936311 | 4.0821672 | 7.4543923 | 16.12658 | 1.060834 |
| 93 | IDL_TG        | -0.08695 | -2.56E-16 | -6.86578 | 6.7036920 | 1.2109895 | 15.64103 | 1.062126 |
| 94 | LDL_FC        | 0.083726 | -8.80E-17 | 6.601024 | 4.1312178 | 7.3834530 | 13.86269 | 1.059751 |
| 95 | L_LDL_C       | 0.076253 | 4.1314792 | 6.021508 | 1.7421440 | 3.0808441 | 10.21365 | 1.054276 |

|     |                |          |           |          |           |           |          |          |
|-----|----------------|----------|-----------|----------|-----------|-----------|----------|----------|
| 96  | M_VLDL_P       | -0.07629 | 1.1477390 | -5.99412 | 2.0623631 | 3.6091355 | 10.04947 | 1.054304 |
| 97  | S_VLDL_C       | -0.07505 | 2.4576191 | -5.89234 | 3.8362951 | 6.6443049 | 9.445902 | 1.053399 |
| 98  | Lactate        | -0.07493 | -4.83E-16 | -5.86114 | 4.6307974 | 7.9385098 | 9.262965 | 1.053313 |
| 99  | Total_FC       | 0.071714 | 4.1548594 | 5.706829 | 1.1586479 | 1.9661904 | 8.37234  | 1.050965 |
| 100 | S_VLDL_PL      | -0.07219 | 1.3901784 | -5.67452 | 1.3998000 | 2.3516640 | 8.188883 | 1.051314 |
| 101 | LA             | 0.070926 | 3.1065025 | 5.606019 | 2.0831636 | 3.4650642 | 7.803325 | 1.050391 |
| 102 | His            | 0.069566 | -1.12E-16 | 5.461322 | 4.7524751 | 7.8276061 | 7.004294 | 1.049401 |
| 103 | VLDL_CE        | -0.06937 | -1.00E-16 | -5.43337 | 5.5604082 | 9.0694037 | 6.852327 | 1.049259 |
| 104 | M_VLDL_PL      | -0.06813 | 1.7384725 | -5.34465 | 9.1056807 | 1.4709176 | 6.375229 | 1.048358 |
| 105 | XS_VLDL_CE     | 0.064928 | -2.25E-16 | 5.255164 | 1.4860554 | 2.3776887 | 5.90191  | 1.046033 |
| 106 | L_LDL_CE       | 0.065018 | -3.38E-16 | 5.124257 | 3.0001896 | 4.7550175 | 5.223903 | 1.046098 |
| 107 | Acetone        | 0.064022 | 4.8684887 | 5.003123 | 5.6633658 | 8.8920137 | 4.61173  | 1.045376 |
| 108 | Gln            | 0.060479 | -4.34E-16 | 4.733367 | 2.2153587 | 3.4461136 | 3.301025 | 1.042812 |
| 109 | S_LDL_FC       | 0.059968 | -2.26E-16 | 4.685213 | 2.8053379 | 4.3238235 | 3.074682 | 1.042443 |
| 110 | L_LDL_L        | 0.057048 | -3.72E-16 | 4.499327 | 6.8349681 | 1.0438860 | 2.222633 | 1.040335 |
| 111 | S_HDL_FC       | 0.054756 | 4.0871187 | 4.384873 | 1.1633198 | 1.7607002 | 1.715152 | 1.038684 |
| 112 | Omega_6        | 0.054241 | 5.4126847 | 4.32339  | 1.5399914 | 2.3099871 | 1.447934 | 1.038313 |
| 113 | Ile            | -0.05336 | -3.06E-17 | -4.25092 | 2.1335288 | 3.1719721 | 1.137782 | 1.037679 |
| 114 | Total_FA       | -0.05236 | 1.0603077 | -4.13786 | 3.5122946 | 5.1760131 | 0.664446 | 1.036962 |
| 115 | L_HDL_TG       | 0.050323 | -1.85E-17 | 4.069856 | 4.7127204 | 6.8846699 | 0.385846 | 1.035497 |
| 116 | M_VLDL_CE      | 0.05104  | 1.0407764 | 4.014399 | 5.9699704 | 8.6461641 | 0.162075 | 1.036011 |
| 117 | Clinical_LDL_C | 0.048593 | -1.09E-16 | 3.81499  | 0.000136  | 0.000196  | -0.6172  | 1.034256 |
| 118 | Total_BCAA     | -0.04664 | -1.98E-16 | -3.77184 | 0.000162  | 0.000231  | -0.7806  | 1.032853 |
| 119 | Leu            | -0.0461  | -2.22E-16 | -3.75599 | 0.000173  | 0.000244  | -0.84016 | 1.032472 |
| 120 | XS_VLDL_C      | 0.045854 | 8.0342097 | 3.690748 | 0.000224  | 0.000313  | -1.08267 | 1.032294 |
| 121 | M_LDL_CE       | -0.04694 | -2.97E-16 | -3.67959 | 0.000234  | 0.000325  | -1.12371 | 1.033068 |
| 122 | Ala            | -0.04367 | -3.34E-16 | -3.43624 | 0.00059   | 0.000813  | -1.9881  | 1.030734 |
| 123 | M_LDL_FC       | 0.043682 | 7.2258201 | 3.416191 | 0.000636  | 0.000868  | -2.05667 | 1.030741 |
| 124 | Phe            | -0.0436  | -8.43E-17 | -3.403   | 0.000667  | 0.000904  | -2.10159 | 1.03068  |
| 125 | L_LDL_PL       | 0.042781 | -4.92E-17 | 3.367328 | 0.00076   | 0.001021  | -2.22213 | 1.030097 |
| 126 | LDL_C          | 0.042803 | 2.8162820 | 3.358024 | 0.000786  | 0.001048  | -2.25337 | 1.030114 |
| 127 | S_HDL_L        | -0.04111 | 4.0575449 | -3.22489 | 0.001261  | 0.001668  | -2.69086 | 1.028908 |
| 128 | M_VLDL_FC      | -0.04081 | -1.43E-16 | -3.19609 | 0.001394  | 0.00183   | -2.78318 | 1.028694 |
| 129 | S_LDL_CE       | -0.03864 | 5.6499773 | -3.02441 | 0.002493  | 0.003246  | -3.3163  | 1.027142 |
| 130 | S_LDL_P        | -0.03831 | 2.8481904 | -3.00206 | 0.002683  | 0.003468  | -3.38354 | 1.026913 |
| 131 | M_LDL_P        | -0.03827 | 1.9975603 | -2.99847 | 0.002715  | 0.003482  | -3.39427 | 1.02688  |
| 132 | Val            | -0.03698 | 1.0272672 | -2.98439 | 0.002843  | 0.003618  | -3.43632 | 1.025963 |
| 133 | S_VLDL_FC      | -0.03551 | 9.2305629 | -2.78049 | 0.00543   | 0.006859  | -4.02315 | 1.024918 |
| 134 | Acetate        | 0.034348 | -6.35E-17 | 2.678479 | 0.007399  | 0.009276  | -4.30115 | 1.024094 |
| 135 | S_HDL_PL       | -0.03322 | -4.64E-16 | -2.61706 | 0.008872  | 0.011041  | -4.46352 | 1.023293 |
| 136 | M_LDL_L        | -0.03236 | 1.4161511 | -2.53426 | 0.011272  | 0.013924  | -4.67647 | 1.022687 |
| 137 | XS_VLDL_PL     | -0.02949 | -2.30E-16 | -2.336   | 0.019496  | 0.023907  | -5.15852 | 1.020648 |
| 138 | Pyruvate       | -0.02975 | 1.8351869 | -2.32612 | 0.020017  | 0.024368  | -5.18152 | 1.020838 |
| 139 | Acetoacetate   | 0.028724 | -9.09E-18 | 2.245575 | 0.024736  | 0.029897  | -5.36536 | 1.02011  |
| 140 | IDL_P          | 0.025715 | -3.00E-16 | 2.029132 | 0.042451  | 0.050941  | -5.82729 | 1.017984 |
| 141 | LDL_CE         | 0.025807 | -3.41E-16 | 2.022892 | 0.043091  | 0.051342  | -5.83991 | 1.018049 |
| 142 | LDL_L          | 0.025699 | 2.1712433 | 2.014918 | 0.043919  | 0.051961  | -5.85599 | 1.017973 |

**Omnivore vs Sweet-tooth**

|    | metabolite    | logFC    | AveExpr   | t        | P.Value   | adj.P.Val | B        | FC       |
|----|---------------|----------|-----------|----------|-----------|-----------|----------|----------|
| 1  | DHA           | 0.177263 | 7.1687594 | 15.60016 | 1.0305184 | 1.7312710 | 113.494  | 1.130736 |
| 2  | Omega_3       | 0.158935 | 1.5143020 | 13.81443 | 2.5889357 | 2.1747060 | 87.48068 | 1.116462 |
| 3  | Unsaturation  | 0.141848 | -4.74E-16 | 12.32745 | 7.3947649 | 4.1410683 | 68.20878 | 1.103318 |
| 4  | HDL_C         | 0.101273 | -3.29E-17 | 9.430308 | 4.2879153 | 1.8009244 | 36.92001 | 1.07272  |
| 5  | HDL_CE        | 0.100273 | -4.64E-16 | 9.399568 | 5.7419610 | 1.9292989 | 36.63248 | 1.071976 |
| 6  | HDL_FC        | 0.099157 | -6.39E-18 | 9.322622 | 1.1877404 | 3.3256733 | 35.91687 | 1.071148 |
| 7  | M_HDL_FC      | 0.097924 | 1.4129149 | 9.06619  | 1.2836903 | 3.0808568 | 33.57426 | 1.070233 |
| 8  | ApoA1         | 0.096205 | 3.3953703 | 8.8584   | 8.4240765 | 1.7690560 | 31.72376 | 1.068958 |
| 9  | M_HDL_C       | 0.096289 | -2.32E-16 | 8.822542 | 1.1605320 | 2.1663264 | 31.40875 | 1.06902  |
| 10 | L_HDL_L       | 0.091044 | 6.0973373 | 8.679141 | 4.1266134 | 6.9327106 | 30.16169 | 1.065141 |
| 11 | M_HDL_CE      | 0.094535 | -2.19E-16 | 8.625114 | 6.6203854 | 1.0111134 | 29.69714 | 1.067721 |
| 12 | L_HDL_PL      | 0.089678 | -3.55E-17 | 8.523642 | 1.5962190 | 2.2347066 | 28.83245 | 1.064132 |
| 13 | Phosphatidylc | 0.094322 | 3.6137649 | 8.431883 | 3.5070020 | 4.5321257 | 28.05929 | 1.067563 |
| 14 | M_HDL_P       | 0.09224  | -1.76E-16 | 8.416583 | 3.9956287 | 4.7947544 | 27.93119 | 1.066024 |
| 15 | HDL_P         | 0.093771 | -7.31E-17 | 8.360149 | 6.4516937 | 7.2258970 | 27.46069 | 1.067156 |
| 16 | M_HDL_L       | 0.092061 | -2.74E-16 | 8.348388 | 7.1263880 | 7.4827074 | 27.36303 | 1.065892 |
| 17 | L_HDL_C       | 0.087845 | -5.84E-17 | 8.307198 | 1.0085200 | 9.9665509 | 27.02209 | 1.062781 |
| 18 | Sphingomyelin | 0.091841 | 2.3502380 | 8.23899  | 1.7858235 | 1.6667686 | 26.4612  | 1.065729 |
| 19 | HDL_PL        | 0.089144 | -3.49E-16 | 8.227882 | 1.9591195 | 1.7322740 | 26.3703  | 1.063739 |
| 20 | L_HDL_CE      | 0.086677 | -1.21E-16 | 8.170556 | 3.1536747 | 2.6490868 | 25.9031  | 1.061921 |
| 21 | L_HDL_FC      | 0.08557  | 1.7729533 | 8.084613 | 6.3997255 | 5.1197804 | 25.20877 | 1.061107 |
| 22 | L_HDL_P       | 0.08462  | 8.0693581 | 7.97432  | 1.5702629 | 1.1991098 | 24.32844 | 1.060408 |
| 23 | HDL_L         | 0.087151 | -2.01E-16 | 7.962424 | 1.7286399 | 1.2626587 | 24.23422 | 1.06227  |
| 24 | Cholines      | 0.088358 | 7.7621062 | 7.874721 | 3.4956722 | 2.4469705 | 23.54384 | 1.063159 |
| 25 | IDL_CE        | 0.091102 | 2.2618503 | 7.854774 | 4.0985393 | 2.7542184 | 23.38789 | 1.065183 |
| 26 | M_HDL_PL      | 0.086986 | -4.54E-16 | 7.812063 | 5.7546152 | 3.7183667 | 23.05528 | 1.062149 |
| 27 | IDL_C         | 0.090433 | 2.2016384 | 7.788957 | 6.9092098 | 4.2990638 | 22.87609 | 1.06469  |
| 28 | Phosphoglyc   | 0.086793 | -3.02E-16 | 7.687572 | 1.5317128 | 9.1902772 | 22.09613 | 1.062007 |
| 29 | Total_P       | 0.083399 | -5.62E-16 | 7.3479   | 2.0495521 | 1.1873267 | 19.55729 | 1.059511 |
| 30 | HDL_size      | 0.077785 | -5.82E-15 | 7.312805 | 2.6622604 | 1.4908658 | 19.3015  | 1.055396 |
| 31 | Gly           | -0.08221 | -1.87E-16 | -7.25747 | 4.0112362 | 2.1738312 | 18.90068 | 1.058642 |
| 32 | IDL_FC        | 0.082454 | -2.33E-16 | 7.087496 | 1.3868332 | 7.2808744 | 17.68841 | 1.058818 |
| 33 | XL_HDL_CE     | 0.076453 | -9.00E-17 | 7.083216 | 1.4303150 | 7.2816040 | 17.65825 | 1.054422 |
| 34 | Albumin       | 0.084204 | 2.2343148 | 7.043058 | 1.9091749 | 9.4335703 | 17.37621 | 1.060102 |
| 35 | XL_HDL_C      | 0.074687 | -1.19E-16 | 6.873531 | 6.3494664 | 3.0477438 | 16.20316 | 1.053133 |
| 36 | Total_CE      | 0.07831  | -3.48E-16 | 6.750166 | 1.4957045 | 6.9799547 | 15.36746 | 1.05578  |
| 37 | IDL_L         | 0.07744  | 3.6370159 | 6.655028 | 2.8668211 | 1.3016917 | 14.73328 | 1.055144 |
| 38 | XL_HDL_L      | 0.071435 | 1.5007609 | 6.59945  | 4.1752730 | 1.8459101 | 14.36698 | 1.050762 |
| 39 | XL_HDL_P      | 0.070074 | -4.36E-17 | 6.44267  | 1.1864330 | 5.1107883 | 13.35015 | 1.049771 |
| 40 | PUFA          | 0.075025 | -3.40E-16 | 6.425509 | 1.3281764 | 5.5783409 | 13.24034 | 1.053379 |
| 41 | Total_C       | 0.075104 | -5.60E-16 | 6.402506 | 1.5443933 | 6.3282461 | 13.09359 | 1.053437 |
| 42 | XL_HDL_PL     | 0.06868  | -1.46E-16 | 6.352095 | 2.1454667 | 8.5818669 | 12.77384 | 1.048757 |
| 43 | IDL_PL        | 0.073093 | 1.3736073 | 6.298409 | 3.0365396 | 1.1863689 | 12.43609 | 1.05197  |
| 44 | GlycA         | -0.07268 | 5.7501732 | -6.1107  | 1.0005299 | 3.8202054 | 11.27768 | 1.05167  |
| 45 | L_LDL_FC      | 0.071689 | -1.59E-16 | 6.062887 | 1.3482429 | 5.0334401 | 10.98817 | 1.050946 |
| 46 | XS_VLDL_CE    | 0.070066 | -2.25E-16 | 6.035773 | 1.5951166 | 5.8256435 | 10.82502 | 1.049764 |

|    |                |          |           |          |           |           |          |          |
|----|----------------|----------|-----------|----------|-----------|-----------|----------|----------|
| 47 | S_HDL_FC       | 0.068283 | 4.0871187 | 5.819859 | 5.9319581 | 2.1203594 | 9.551856 | 1.048468 |
| 48 | Total_FC       | 0.066983 | 4.1548594 | 5.673236 | 1.4103419 | 4.9361967 | 8.713673 | 1.047524 |
| 49 | LDL_FC         | 0.066288 | -8.80E-17 | 5.5624   | 2.6768932 | 9.1779198 | 8.094237 | 1.047019 |
| 50 | L_LDL_C        | 0.06463  | 4.1314792 | 5.432003 | 5.6030224 | 1.8826155 | 7.381111 | 1.045817 |
| 51 | XL_HDL_FC      | 0.059648 | -1.99E-16 | 5.350685 | 8.8074757 | 2.9012861 | 6.94494  | 1.042212 |
| 52 | XS_VLDL_C      | 0.062346 | 8.0342097 | 5.340997 | 9.2911069 | 3.0017422 | 6.893415 | 1.044162 |
| 53 | Total_PL       | 0.061502 | -9.06E-16 | 5.329145 | 9.9178360 | 3.1437669 | 6.830504 | 1.043552 |
| 54 | Val            | 0.060604 | 1.0272672 | 5.205729 | 1.9413426 | 6.0397327 | 6.183726 | 1.042902 |
| 55 | L_LDL_CE       | 0.060197 | -3.38E-16 | 5.049518 | 4.4475504 | 1.3585244 | 5.386783 | 1.042608 |
| 56 | Clinical_LDL_C | 0.060215 | -1.09E-16 | 5.031489 | 4.8866638 | 1.4659991 | 5.296366 | 1.042621 |
| 57 | XXL_VLDL_PL    | -0.05802 | -6.15E-17 | -5.0048  | 5.6143607 | 1.6547589 | 5.163101 | 1.041035 |
| 58 | Leu            | 0.056555 | -2.22E-16 | 4.903941 | 9.4279161 | 2.7308446 | 4.66592  | 1.03998  |
| 59 | Total_BCAA     | 0.055862 | -1.98E-16 | 4.808732 | 1.5241039 | 4.3398213 | 4.205858 | 1.03948  |
| 60 | S_HDL_C        | 0.057327 | -3.92E-17 | 4.77768  | 1.7792066 | 4.9817785 | 4.057763 | 1.040536 |
| 61 | XXL_VLDL_FC    | -0.05549 | -7.42E-17 | -4.77054 | 1.8433903 | 5.0768783 | 4.02386  | 1.039213 |
| 62 | XXL_VLDL_C     | -0.05537 | 2.4222851 | -4.76634 | 1.8821854 | 5.1001153 | 4.003937 | 1.039124 |
| 63 | LDL_C          | 0.056709 | 2.8162820 | 4.735124 | 2.1962630 | 5.8567013 | 3.856356 | 1.04009  |
| 64 | L_LDL_PL       | 0.056412 | -4.92E-17 | 4.725935 | 2.2979216 | 6.0320444 | 3.813098 | 1.039877 |
| 65 | XXL_VLDL_CE    | -0.05484 | 4.5534688 | -4.71929 | 2.3741894 | 6.1363665 | 3.781887 | 1.038745 |
| 66 | L_LDL_L        | 0.055585 | -3.72E-16 | 4.665939 | 3.0814716 | 7.7623828 | 3.532756 | 1.03928  |
| 67 | XXL_VLDL_L     | -0.05399 | 8.5438066 | -4.66499 | 3.0957122 | 7.7623828 | 3.528353 | 1.038135 |
| 68 | XXL_VLDL_P     | -0.05383 | -3.16E-17 | -4.63211 | 3.6303474 | 8.9690936 | 3.376251 | 1.038017 |
| 69 | Citrate        | -0.0537  | -2.53E-16 | -4.55575 | 5.2342946 | 1.2744369 | 3.027221 | 1.037926 |
| 70 | IDL_P          | 0.054026 | -3.00E-16 | 4.537269 | 5.7143190 | 1.3714365 | 2.943593 | 1.038158 |
| 71 | XXL_VLDL_TG    | -0.05111 | 4.3822190 | -4.40805 | 1.0456054 | 2.4741085 | 2.368477 | 1.03606  |
| 72 | S_HDL_PL       | 0.051386 | -4.64E-16 | 4.308804 | 1.6450808 | 3.8385218 | 1.938029 | 1.03626  |
| 73 | M_VLDL_CE      | 0.051106 | 1.0407764 | 4.2782   | 1.8882252 | 4.3455046 | 1.807269 | 1.036059 |
| 74 | non_HDL_C      | 0.050416 | 5.3692532 | 4.208968 | 2.5706625 | 5.8360987 | 1.514906 | 1.035564 |
| 75 | S_LDL_FC       | 0.050404 | -2.26E-16 | 4.191288 | 2.7793606 | 6.2257677 | 1.441006 | 1.035555 |
| 76 | LDL_CE         | 0.049794 | -3.41E-16 | 4.154274 | 3.2695973 | 7.2275310 | 1.287303 | 1.035117 |
| 77 | S_HDL_CE       | 0.049947 | 4.9696560 | 4.148324 | 3.3556870 | 7.3214990 | 1.262724 | 1.035227 |
| 78 | M_LDL_FC       | 0.049569 | 7.2258201 | 4.126006 | 3.6982091 | 7.9653736 | 1.170835 | 1.034956 |
| 79 | Remnant_C      | 0.048969 | -2.30E-16 | 4.093947 | 4.2487532 | 9.0353233 | 1.039711 | 1.034525 |
| 80 | VLDL_size      | -0.047   | -1.90E-15 | -4.04638 | 5.2108736 | 0.000108  | 0.847022 | 1.033116 |
| 81 | S_HDL_P        | 0.0486   | -2.33E-17 | 4.045804 | 5.2235919 | 0.000108  | 0.844722 | 1.034261 |
| 82 | S_HDL_TG       | -0.04552 | -1.32E-16 | -3.9086  | 9.2976547 | 0.00019   | 0.301655 | 1.032054 |
| 83 | LDL_L          | 0.046479 | 2.1712433 | 3.878624 | 0.000105  | 0.000213  | 0.185498 | 1.032741 |
| 84 | LDL_PL         | 0.045492 | 8.7788114 | 3.791805 | 0.00015   | 0.0003    | -0.14588 | 1.032035 |
| 85 | XL_VLDL_P      | -0.04352 | 5.3183668 | -3.76395 | 0.000167  | 0.000331  | -0.25061 | 1.030629 |
| 86 | XL_VLDL_PL     | -0.04307 | 6.4972395 | -3.71596 | 0.000203  | 0.000396  | -0.42925 | 1.030305 |
| 87 | XL_VLDL_TG     | -0.04156 | 7.2210866 | -3.60421 | 0.000313  | 0.000605  | -0.8363  | 1.029224 |
| 88 | S_LDL_TG       | -0.04157 | -1.05E-16 | -3.52757 | 0.00042   | 0.000802  | -1.10831 | 1.029233 |
| 89 | S_HDL_L        | 0.041934 | 4.0575449 | 3.500821 | 0.000464  | 0.000876  | -1.20186 | 1.029493 |
| 90 | XL_VLDL_L      | -0.04027 | 7.7064098 | -3.48709 | 0.000489  | 0.000912  | -1.2496  | 1.028309 |
| 91 | M_VLDL_C       | 0.041705 | 2.1030542 | 3.475538 | 0.00051   | 0.000942  | -1.28964 | 1.029329 |
| 92 | XS_VLDL_FC     | 0.039994 | 2.5723480 | 3.387151 | 0.000707  | 0.001291  | -1.59149 | 1.028109 |
| 93 | XL_VLDL_FC     | -0.03935 | -1.59E-17 | -3.38381 | 0.000716  | 0.001293  | -1.60276 | 1.027654 |
| 94 | L_VLDL_PL      | -0.03887 | 9.8460974 | -3.35962 | 0.000781  | 0.001396  | -1.68393 | 1.027312 |

|     |            |          |           |          |          |          |          |          |
|-----|------------|----------|-----------|----------|----------|----------|----------|----------|
| 95  | M_LDL_TG   | -0.03915 | 1.1059306 | -3.30406 | 0.000954 | 0.001687 | -1.86817 | 1.027506 |
| 96  | Omega_6    | 0.038732 | 5.4126847 | 3.285789 | 0.001018 | 0.001781 | -1.9281  | 1.027211 |
| 97  | Ala        | -0.03911 | -3.34E-16 | -3.27538 | 0.001056 | 0.001829 | -1.9621  | 1.027481 |
| 98  | Total_L    | 0.037532 | -6.17E-16 | 3.149657 | 0.001636 | 0.002804 | -2.36408 | 1.026357 |
| 99  | XS_VLDL_L  | 0.036424 | -1.86E-16 | 3.082923 | 0.002051 | 0.003481 | -2.57107 | 1.025568 |
| 100 | MUFA       | -0.03607 | 3.4142440 | -3.03139 | 0.002436 | 0.004092 | -2.72789 | 1.025318 |
| 101 | His        | 0.036124 | -1.12E-16 | 3.018369 | 0.002543 | 0.00423  | -2.76709 | 1.025355 |
| 102 | L_VLDL_P   | -0.0349  | 2.4577343 | -3.00693 | 0.002641 | 0.004349 | -2.8014  | 1.024483 |
| 103 | L_VLDL_FC  | -0.03426 | -6.48E-20 | -2.95769 | 0.003101 | 0.005058 | -2.94755 | 1.024032 |
| 104 | ApoB       | 0.035419 | -1.47E-16 | 2.951143 | 0.003168 | 0.005117 | -2.96681 | 1.024855 |
| 105 | M_LDL_C    | 0.03531  | -1.17E-16 | 2.941117 | 0.003272 | 0.005235 | -2.99621 | 1.024777 |
| 106 | VLDL_TG    | -0.03379 | -2.03E-16 | -2.91422 | 0.003568 | 0.005654 | -3.07459 | 1.023696 |
| 107 | Creatinine | -0.03122 | -9.99E-17 | -2.86357 | 0.004191 | 0.00658  | -3.22024 | 1.021874 |
| 108 | Total_TG   | -0.0331  | 1.2565476 | -2.83174 | 0.004632 | 0.007205 | -3.31045 | 1.023206 |
| 109 | XL_VLDL_C  | -0.03267 | 5.3256163 | -2.79739 | 0.005154 | 0.007925 | -3.40669 | 1.022904 |
| 110 | XS_VLDL_P  | 0.033141 | -4.08E-19 | 2.795199 | 0.005189 | 0.007925 | -3.41279 | 1.023237 |
| 111 | L_HDL_TG   | 0.032395 | -1.85E-17 | 2.788427 | 0.005299 | 0.00802  | -3.43161 | 1.022708 |
| 112 | L_LDL_P    | 0.033402 | -2.67E-16 | 2.782137 | 0.005403 | 0.008104 | -3.44905 | 1.023422 |
| 113 | Tyr        | 0.032858 | -9.97E-17 | 2.751898 | 0.005928 | 0.008813 | -3.53233 | 1.023037 |
| 114 | LDL_P      | 0.031535 | -2.09E-16 | 2.625579 | 0.008653 | 0.01274  | -3.87041 | 1.022099 |
| 115 | LDL_TG     | -0.03117 | -1.73E-17 | -2.62294 | 0.008721 | 0.01274  | -3.87729 | 1.021837 |
| 116 | S_LDL_C    | 0.03133  | -2.49E-16 | 2.606175 | 0.009159 | 0.013265 | -3.92093 | 1.021954 |
| 117 | S_LDL_PL   | 0.031183 | 1.3105022 | 2.594224 | 0.009484 | 0.013618 | -3.95186 | 1.02185  |
| 118 | M_LDL_P    | 0.031052 | 1.9975603 | 2.589671 | 0.00961  | 0.013682 | -3.96361 | 1.021757 |
| 119 | L_VLDL_L   | -0.02989 | 1.2301678 | -2.58001 | 0.009883 | 0.013953 | -3.98847 | 1.020932 |
| 120 | Ile        | 0.02953  | -3.06E-17 | 2.503872 | 0.012288 | 0.017203 | -4.18112 | 1.02068  |
| 121 | Acetate    | 0.029855 | -6.35E-17 | 2.477914 | 0.013219 | 0.018354 | -4.24548 | 1.02091  |
| 122 | Lactate    | -0.02935 | -4.83E-16 | -2.44372 | 0.014541 | 0.020023 | -4.32924 | 1.020555 |
| 123 | M_LDL_CE   | 0.028662 | -2.97E-16 | 2.391561 | 0.016781 | 0.022921 | -4.45477 | 1.020066 |
| 124 | L_VLDL_TG  | -0.02735 | -9.91E-17 | -2.36181 | 0.01819  | 0.024645 | -4.52514 | 1.019139 |
| 125 | S_VLDL_TG  | -0.02758 | -2.28E-16 | -2.35472 | 0.018541 | 0.024919 | -4.54179 | 1.019304 |
| 126 | M_LDL_PL   | 0.02724  | -3.10E-16 | 2.268149 | 0.023325 | 0.0311   | -4.74099 | 1.01906  |
| 127 | S_LDL_L    | 0.026948 | 8.4810774 | 2.243239 | 0.024887 | 0.032921 | -4.79692 | 1.018855 |
| 128 | M_LDL_L    | 0.026634 | 1.4161511 | 2.219725 | 0.026443 | 0.034706 | -4.84916 | 1.018633 |
| 129 | M_VLDL_FC  | 0.025913 | -1.43E-16 | 2.159723 | 0.0308   | 0.040111 | -4.97994 | 1.018124 |
| 130 | XS_VLDL_TG | -0.02536 | -3.67E-16 | -2.13462 | 0.032798 | 0.042385 | -5.03361 | 1.017732 |
| 131 | L_LDL_TG   | -0.02492 | 2.1863235 | -2.09483 | 0.036192 | 0.046414 | -5.11736 | 1.017423 |
| 132 | L_VLDL_C   | -0.02406 | -5.35E-17 | -2.05679 | 0.039712 | 0.050543 | -5.19596 | 1.016814 |
| 133 | XL_VLDL_CE | -0.02411 | 1.7860660 | -2.05238 | 0.040139 | 0.050702 | -5.20499 | 1.016849 |
| 134 | S_VLDL_FC  | 0.024463 | 9.2305629 | 2.038815 | 0.041475 | 0.051998 | -5.23261 | 1.017101 |

Supplementary Table 9: Multinomial logistic regression for differentially expressed protein adjusted for age, sex and BMI

|                                                | Profile 2 (Omnivore) |          | Profile 3 (Sweet-tooth) |          |
|------------------------------------------------|----------------------|----------|-------------------------|----------|
|                                                | Coefficient          | Pvalue   | Coefficient             | Pvalue   |
| LA                                             | 0.62                 | 0.00     | 0.67                    | 0.00     |
| Gln                                            | 0.73                 | 0.04     | 1.18                    | 0.32     |
| bOHbutyrate                                    | 1.24                 | 0.28     | 5.18                    | 1.62e-14 |
| Acetoacetate                                   | 0.28                 | 0.00     | 0.00                    | 0.00     |
| Acetone                                        | 0.00                 | 0.00     | 4.921069334             | 0.00     |
| ApoB                                           | 1.34                 | 0.38     | 0.39                    | 0.01     |
| His                                            | 0.08                 | 0.00     | 0.00                    | 0.00     |
| Tyr                                            | 3.70                 | 0.01     | 0.28                    | 0.01     |
| S_HDL_PL                                       | 3.87                 | 0.03     | 0.07                    | 0.00     |
| S_HDL_CE                                       | 0.12                 | 0.00     | 0.13                    | 0.00     |
| M_LDL_C                                        | 25.28                | 2.26e-09 | 65.13                   | 6.66e-16 |
| S_LDL_L                                        | 0.03                 | 9.23e-08 | 0.02                    | 1.18e-11 |
| S_HDL_L                                        | 0.92                 | 0.81     | 3.65                    | 0.02     |
| Total_FA                                       | 1.06                 | 0.00     | 1.12                    | 5.33e-13 |
| sex_f31_0_0Male                                | 2.50                 | 0.00     | 2.36                    | 0.00     |
| age_when_attended_assessment_centre_f21003_0_0 | 0.99                 | 2.65e-06 | 0.98                    | 0.00     |
| body_mass_index_bmi_f21001_0_0                 | 1.04                 | 0.00     | 1.05                    | 0.00     |

Supplementary Table 10: GO Term from Enrichment analysis of differentially expressed protein

| Category         | Code       | Term                                                                | Count | %      | PValue | Fold Enrichment | Bonferroni | Benjamini | FDR   | group                           |
|------------------|------------|---------------------------------------------------------------------|-------|--------|--------|-----------------|------------|-----------|-------|---------------------------------|
| GOTERM_BP_DIRECT | GO:0014823 | response to activity                                                | 3     | 42.86  | 6E-05  | 2E+02           | 1E-02      | 9E-03     | 9E-03 | Health-conscious vs Omnivore    |
| GOTERM_BP_DIRECT | GO:0051384 | response to glucocorticoid                                          | 3     | 42.86  | 9E-05  | 2E+02           | 2E-02      | 9E-03     | 9E-03 | Health-conscious vs Omnivore    |
| GOTERM_CC_DIRECT | GO:0005615 | extracellular space                                                 | 5     | 71.43  | 1E-03  | 7E+00           | 2E-02      | 2E-02     | 2E-02 | Health-conscious vs Omnivore    |
| GOTERM_CC_DIRECT | GO:0005576 | extracellular region                                                | 5     | 71.43  | 2E-03  | 7E+00           | 3E-02      | 2E-02     | 2E-02 | Health-conscious vs Omnivore    |
| GOTERM_BP_DIRECT | GO:0042755 | eating behavior                                                     | 2     | 28.57  | 8E-03  | 2E+02           | 8E-01      | 5E-01     | 5E-01 | Health-conscious vs Omnivore    |
| GOTERM_BP_DIRECT | GO:0030073 | insulin secretion                                                   | 2     | 28.57  | 1E-02  | 2E+02           | 9E-01      | 5E-01     | 5E-01 | Health-conscious vs Omnivore    |
| KEGG_PATHWAY     | hsa04060   | Cytokine-cytokine receptor interaction                              | 3     | 42.86  | 1E-02  | 1E+01           | 1E-01      | 1E-01     | 1E-01 | Health-conscious vs Omnivore    |
| GOTERM_BP_DIRECT | GO:0042531 | positive regulation of tyrosine phosphorylation of STAT protein     | 2     | 28.57  | 2E-02  | 1E+02           | 1E+00      | 5E-01     | 5E-01 | Health-conscious vs Omnivore    |
| GOTERM_BP_DIRECT | GO:0014068 | positive regulation of phosphatidylinositol 3-kinase signaling      | 2     | 28.57  | 2E-02  | 8E+01           | 1E+00      | 5E-01     | 5E-01 | Health-conscious vs Omnivore    |
| GOTERM_BP_DIRECT | GO:0007565 | female pregnancy                                                    | 2     | 28.57  | 2E-02  | 8E+01           | 1E+00      | 5E-01     | 5E-01 | Health-conscious vs Omnivore    |
| GOTERM_BP_DIRECT | GO:0032355 | response to estradiol                                               | 2     | 28.57  | 3E-02  | 6E+01           | 1E+00      | 5E-01     | 5E-01 | Health-conscious vs Omnivore    |
| GOTERM_BP_DIRECT | GO:0032869 | cellular response to insulin stimulus                               | 2     | 28.57  | 3E-02  | 6E+01           | 1E+00      | 5E-01     | 5E-01 | Health-conscious vs Omnivore    |
| GOTERM_BP_DIRECT | GO:0045471 | response to ethanol                                                 | 2     | 28.57  | 3E-02  | 6E+01           | 1E+00      | 5E-01     | 5E-01 | Health-conscious vs Omnivore    |
| GOTERM_BP_DIRECT | GO:0050729 | positive regulation of inflammatory response                        | 2     | 28.57  | 3E-02  | 6E+01           | 1E+00      | 5E-01     | 5E-01 | Health-conscious vs Omnivore    |
| GOTERM_BP_DIRECT | GO:0042593 | glucose homeostasis                                                 | 2     | 28.57  | 3E-02  | 5E+01           | 1E+00      | 5E-01     | 5E-01 | Health-conscious vs Omnivore    |
| GOTERM_MF_DIRECT | GO:0005179 | hormone activity                                                    | 2     | 28.57  | 4E-02  | 5E+01           | 6E-01      | 8E-01     | 8E-01 | Health-conscious vs Omnivore    |
| GOTERM_BP_DIRECT | GO:0007165 | signal transduction                                                 | 3     | 42.86  | 4E-02  | 7E+00           | 1E+00      | 6E-01     | 6E-01 | Health-conscious vs Omnivore    |
| GOTERM_BP_DIRECT | GO:0043410 | positive regulation of MAPK cascade                                 | 2     | 28.57  | 4E-02  | 4E+01           | 1E+00      | 6E-01     | 6E-01 | Health-conscious vs Omnivore    |
| GOTERM_BP_DIRECT | GO:0051897 | positive regulation of protein kinase B signaling                   | 2     | 28.57  | 5E-02  | 4E+01           | 1E+00      | 6E-01     | 6E-01 | Health-conscious vs Omnivore    |
| GOTERM_BP_DIRECT | GO:0006629 | lipid metabolic process                                             | 2     | 28.57  | 6E-02  | 3E+01           | 1E+00      | 7E-01     | 7E-01 | Health-conscious vs Omnivore    |
| GOTERM_MF_DIRECT | GO:0005125 | cytokine activity                                                   | 2     | 28.57  | 6E-02  | 3E+01           | 8E-01      | 8E-01     | 8E-01 | Health-conscious vs Omnivore    |
| KEGG_PATHWAY     | hsa04630   | JAK-STAT signaling pathway                                          | 2     | 28.57  | 9E-02  | 2E+01           | 7E-01      | 6E-01     | 6E-01 | Health-conscious vs Omnivore    |
| GOTERM_BP_DIRECT | GO:0043567 | regulation of insulin-like growth factor receptor signaling pathway | 2     | 66.67  | 8E-04  | 2E+03           | 3E-02      | 3E-02     | 3E-02 | Health-conscious vs Omnivore    |
| GOTERM_MF_DIRECT | GO:0031995 | insulin-like growth factor II binding                               | 2     | 66.67  | 8E-04  | 2E+03           | 8E-03      | 7E-03     | 7E-03 | Health-conscious vs Omnivore    |
| GOTERM_MF_DIRECT | GO:0031994 | insulin-like growth factor I binding                                | 2     | 66.67  | 1E-03  | 1E+03           | 1E-02      | 7E-03     | 7E-03 | Health-conscious vs Omnivore    |
| GOTERM_MF_DIRECT | GO:0005520 | insulin-like growth factor binding                                  | 2     | 66.67  | 2E-03  | 6E+02           | 2E-02      | 8E-03     | 8E-03 | Health-conscious vs Omnivore    |
| GOTERM_CC_DIRECT | GO:0005615 | extracellular space                                                 | 3     | 100.00 | 9E-03  | 1E+01           | 9E-02      | 6E-02     | 6E-02 | Health-conscious vs Omnivore    |
| GOTERM_BP_DIRECT | GO:0032355 | response to estradiol                                               | 2     | 66.67  | 1E-02  | 1E+02           | 3E-01      | 2E-01     | 2E-01 | Health-conscious vs Omnivore    |
| GOTERM_CC_DIRECT | GO:0005576 | extracellular region                                                | 3     | 100.00 | 1E-02  | 9E+00           | 1E-01      | 6E-02     | 6E-02 | Health-conscious vs Omnivore    |
| GOTERM_BP_DIRECT | GO:0007568 | aging                                                               | 2     | 66.67  | 2E-02  | 9E+01           | 4E-01      | 2E-01     | 2E-01 | Health-conscious vs Omnivore    |
| GOTERM_BP_DIRECT | GO:0090090 | negative regulation of canonical Wnt signaling pathway              | 2     | 66.67  | 2E-02  | 8E+01           | 5E-01      | 2E-01     | 2E-01 | Health-conscious vs Omnivore    |
| GOTERM_MF_DIRECT | GO:0005102 | receptor binding                                                    | 2     | 66.67  | 4E-02  | 3E+01           | 4E-01      | 1E-01     | 1E-01 | Health-conscious vs Omnivore    |
| GOTERM_BP_DIRECT | GO:0014823 | response to activity                                                | 3     | 60.00  | 2E-05  | 3E+02           | 4E-03      | 4E-03     | 4E-03 | Health-conscious vs Sweet-tooth |
| GOTERM_CC_DIRECT | GO:0005576 | extracellular region                                                | 5     | 100.00 | 1E-04  | 9E+00           | 2E-03      | 2E-03     | 2E-03 | Health-conscious vs Sweet-tooth |
| GOTERM_CC_DIRECT | GO:0005615 | extracellular space                                                 | 4     | 80.00  | 3E-03  | 8E+00           | 4E-02      | 2E-02     | 2E-02 | Health-conscious vs Sweet-tooth |
| GOTERM_BP_DIRECT | GO:0042755 | eating behavior                                                     | 2     | 40.00  | 5E-03  | 3E+02           | 6E-01      | 4E-01     | 4E-01 | Health-conscious vs Sweet-tooth |



|                  |            |                                                      |   |        |       |       |       |       |       |                                 |
|------------------|------------|------------------------------------------------------|---|--------|-------|-------|-------|-------|-------|---------------------------------|
| GOTERM_BP_DIRECT | GO:0051384 | response to glucocorticoid                           | 2 | 40.00  | 9E-03 | 2E+02 | 8E-01 | 4E-01 | 4E-01 | Health-conscious vs Sweet-tooth |
| GOTERM_BP_DIRECT | GO:0007565 | female pregnancy                                     | 2 | 40.00  | 1E-02 | 1E+02 | 9E-01 | 4E-01 | 4E-01 | Health-conscious vs Sweet-tooth |
| GOTERM_BP_DIRECT | GO:0032355 | response to estradiol                                | 2 | 40.00  | 2E-02 | 1E+02 | 9E-01 | 4E-01 | 4E-01 | Health-conscious vs Sweet-tooth |
| GOTERM_BP_DIRECT | GO:0032869 | cellular response to insulin stimulus                | 2 | 40.00  | 2E-02 | 9E+01 | 1E+00 | 4E-01 | 4E-01 | Health-conscious vs Sweet-tooth |
| GOTERM_BP_DIRECT | GO:0045471 | response to ethanol                                  | 2 | 40.00  | 2E-02 | 9E+01 | 1E+00 | 4E-01 | 4E-01 | Health-conscious vs Sweet-tooth |
| GOTERM_BP_DIRECT | GO:0042593 | glucose homeostasis                                  | 2 | 40.00  | 2E-02 | 8E+01 | 1E+00 | 4E-01 | 4E-01 | Health-conscious vs Sweet-tooth |
| GOTERM_CC_DIRECT | GO:0005796 | Golgi lumen                                          | 2 | 40.00  | 2E-02 | 8E+01 | 2E-01 | 9E-02 | 9E-02 | Health-conscious vs Sweet-tooth |
| GOTERM_MF_DIRECT | GO:0005179 | hormone activity                                     | 2 | 40.00  | 2E-02 | 7E+01 | 3E-01 | 4E-01 | 4E-01 | Health-conscious vs Sweet-tooth |
| GOTERM_CC_DIRECT | GO:0005615 | extracellular space                                  | 4 | 100.00 | 9E-04 | 1E+01 | 1E-02 | 9E-03 | 9E-03 | Health-conscious vs Sweet-tooth |
| GOTERM_CC_DIRECT | GO:0005576 | extracellular region                                 | 4 | 100.00 | 1E-03 | 9E+00 | 2E-02 | 9E-03 | 9E-03 | Health-conscious vs Sweet-tooth |
| GOTERM_BP_DIRECT | GO:0040018 | positive regulation of multicellular organism growth | 2 | 50.00  | 6E-03 | 3E+02 | 3E-01 | 4E-01 | 4E-01 | Health-conscious vs Sweet-tooth |
| KEGG_PATHWAY     | hsa04935   | Growth hormone synthesis, secretion and action       | 2 | 50.00  | 1E-02 | 7E+01 | 8E-02 | 8E-02 | 8E-02 | Health-conscious vs Sweet-tooth |
| GOTERM_MF_DIRECT | GO:0005179 | hormone activity                                     | 2 | 50.00  | 2E-02 | 8E+01 | 2E-01 | 3E-01 | 3E-01 | Health-conscious vs Sweet-tooth |
| KEGG_PATHWAY     | hsa04080   | Neuroactive ligand-receptor interaction              | 2 | 50.00  | 4E-02 | 2E+01 | 2E-01 | 1E-01 | 1E-01 | Health-conscious vs Sweet-tooth |
| GOTERM_CC_DIRECT | GO:0005788 | endoplasmic reticulum lumen                          | 2 | 50.00  | 4E-02 | 3E+01 | 5E-01 | 2E-01 | 2E-01 | Health-conscious vs Sweet-tooth |

Supplementary Table 11: Relative Risk of chronic diseases

| profile          | disease                               | rr       | lower    | upper    | Pvalue   |
|------------------|---------------------------------------|----------|----------|----------|----------|
| Health-conscious | ANAEMIA                               | 0.776951 | 0.736199 | 0.819958 | 0        |
| Health-conscious | ANGINA                                | 0.614239 | 0.582707 | 0.647477 | 0        |
| Health-conscious | ANXIETY                               | 0.862837 | 0.817503 | 0.910684 | 8.43E-08 |
| Health-conscious | ASTHMA                                | 0.89703  | 0.865478 | 0.929733 | 2.71E-09 |
| Health-conscious | ATRIAL FIBRILLIATION                  | 0.78474  | 0.751526 | 0.819423 | 0        |
| Health-conscious | BRONCHIECTASIS                        | 0.824458 | 0.742155 | 0.915888 | 0.000321 |
| Health-conscious | CANCER                                | 0.939335 | 0.914511 | 0.964834 | 4.65E-06 |
| Health-conscious | CHRONIC KIDNEY DISEASE                | 0.580415 | 0.544266 | 0.618964 | 0        |
| Health-conscious | CHRONIC OBSTRUCTIVE PULMONARY DISEASE | 0.527254 | 0.488059 | 0.569596 | 0        |
| Health-conscious | CHRONIC SINUSITIS                     | 0.948135 | 0.851252 | 1.056044 | 0.332826 |
| Health-conscious | CIRRHOISIS                            | 0.526278 | 0.423957 | 0.653293 | 5.90E-09 |
| Health-conscious | DEMENTIA                              | 0.496233 | 0.38165  | 0.645218 | 1.68E-07 |
| Health-conscious | DEPRESSION                            | 0.780838 | 0.74288  | 0.820735 | 0        |
| Health-conscious | DIABETES                              | 0.650162 | 0.620362 | 0.681394 | 0        |
| Health-conscious | ECZEMA OR DERMATITIS                  | 0.85741  | 0.762286 | 0.964405 | 0.010345 |
| Health-conscious | EPILEPSY                              | 0.811781 | 0.72715  | 0.906262 | 0.000205 |
| Health-conscious | GLAUCOMA                              | 0.951799 | 0.894959 | 1.01225  | 0.115845 |
| Health-conscious | HEART FAILURE                         | 0.638406 | 0.591652 | 0.688856 | 0        |
| Health-conscious | HEPATITIS                             | 0.792608 | 0.627383 | 1.001345 | 0.051328 |
| Health-conscious | HYPERTENSION                          | 0.744334 | 0.726918 | 0.762168 | 0        |
| Health-conscious | INFLAMMATORY BOWEL DISEASE            | 0.925983 | 0.885358 | 0.968471 | 0.00078  |
| Health-conscious | IRRITABLE BOWEL SYNDROME              | 0.899438 | 0.843643 | 0.958924 | 0.00118  |
| Health-conscious | MENINGITIS                            | 0.875001 | 0.605004 | 1.26549  | 0.478146 |
| Health-conscious | MIGRAINE                              | 0.997107 | 0.919914 | 1.080778 | 0.943817 |
| Health-conscious | MULTIPLE SCLEROSIS                    | 1.038096 | 0.882333 | 1.221357 | 0.652165 |
| Health-conscious | MYOCARDIAL INFARCTION                 | 0.637637 | 0.593702 | 0.684823 | 0        |
| Health-conscious | OSTEOPOROSIS                          | 1.324988 | 1.257946 | 1.395603 | 0        |
| Health-conscious | PARKINSONS DISEASE                    | 0.636132 | 0.53458  | 0.756975 | 3.44E-07 |
| Health-conscious | PERIPHERAL VASCULAR DISEASE           | 0.864783 | 0.789946 | 0.946709 | 0.001656 |
| Health-conscious | PROSTATE PROBLEM                      | 0.541558 | 0.515277 | 0.56918  | 0        |
| Health-conscious | RHEUMATOID ARTHRITIS                  | 0.776157 | 0.712449 | 0.845562 | 6.67E-09 |
| Health-conscious | SCHIZOPHRENIA                         | 0.751377 | 0.580054 | 0.973301 | 0.03039  |
| Health-conscious | STROKE                                | 0.759445 | 0.713321 | 0.808552 | 0        |
| Health-conscious | THYROID PROBLEM                       | 0.993312 | 0.954339 | 1.033875 | 0.742438 |
| Health-conscious | TUBERCULOSIS                          | 0.525    | 0.285874 | 0.964152 | 0.037736 |
| Health-conscious | VESTIBULAR DISORDER                   | 0.845676 | 0.757405 | 0.944236 | 0.002881 |
| Health-conscious | CONSTIPATION                          | 0.917103 | 0.874657 | 0.961608 | 0.000345 |
| Health-conscious | DYSPEPSIA                             | 0.847489 | 0.812588 | 0.883888 | 1.24E-14 |
| Health-conscious | HEARING LOSS                          | 0.770565 | 0.722094 | 0.82229  | 3.77E-15 |
| Health-conscious | DIVENTICULAR DISEASES OF INTESTINE    | 0.822512 | 0.798793 | 0.846936 | 0        |
| Health-conscious | ENDOMETRIOSIS                         | 1.073027 | 0.979045 | 1.176032 | 0.131773 |
| Omnivores        | ANAEMIA                               | 0.957744 | 0.911429 | 1.006414 | 0.087785 |
| Omnivores        | ANGINA                                | 1.125636 | 1.076043 | 1.177514 | 2.63E-07 |
| Omnivores        | ANXIETY                               | 0.953087 | 0.905883 | 1.002751 | 0.063738 |
| Omnivores        | ASTHMA                                | 0.947444 | 0.915762 | 0.980223 | 0.001864 |

|             |                                 |          |          |          |          |
|-------------|---------------------------------|----------|----------|----------|----------|
| Omnivores   | ATRIAL FIBRILLIATION            | 1.109511 | 1.066737 | 1.154    | 2.21E-07 |
| Omnivores   | BRONCHIECTASIS                  | 0.980537 | 0.889333 | 1.081094 | 0.693139 |
| Omnivores   | CANCER                          | 1.069992 | 1.043185 | 1.097489 | 1.73E-07 |
| Omnivores   | CHRONIC KIDNEY DISEASE          | 1.101177 | 1.04313  | 1.162454 | 0.000486 |
| Omnivores   | CHRONIC OBSTRUCTIVE PULMONAR    | 1.061844 | 0.996572 | 1.131391 | 0.063754 |
| Omnivores   | CHRONIC SINUSITIS               | 0.933469 | 0.84163  | 1.035329 | 0.192594 |
| Omnivores   | CIRRHOSIS                       | 0.962825 | 0.805051 | 1.151518 | 0.678215 |
| Omnivores   | DEMENTIA                        | 1.071531 | 0.867801 | 1.323089 | 0.520789 |
| Omnivores   | DEPRESSION                      | 0.962085 | 0.918935 | 1.007261 | 0.098746 |
| Omnivores   | DIABETES                        | 0.978001 | 0.938403 | 1.019269 | 0.29147  |
| Omnivores   | ECZEMA OR DERMATITIS            | 0.963909 | 0.863242 | 1.076316 | 0.513644 |
| Omnivores   | EPILEPSY                        | 0.920655 | 0.83081  | 1.020217 | 0.114577 |
| Omnivores   | GLAUCOMA                        | 1.010429 | 0.952879 | 1.071455 | 0.72877  |
| Omnivores   | HEART FAILURE                   | 1.082916 | 1.014012 | 1.156503 | 0.017557 |
| Omnivores   | HEPATITIS                       | 0.903399 | 0.726884 | 1.122779 | 0.359712 |
| Omnivores   | HYPERTENSION                    | 1.100965 | 1.077369 | 1.125079 | 0        |
| Omnivores   | INFLAMMATORY BOWEL DISEASE      | 0.926273 | 0.887318 | 0.966939 | 0.000476 |
| Omnivores   | IRRITABLE BOWEL SYNDROME        | 0.860977 | 0.809531 | 0.915692 | 1.92E-06 |
| Omnivores   | MENINGITIS                      | 0.999599 | 0.707245 | 1.412803 | 0.998188 |
| Omnivores   | MIGRAINE                        | 0.816202 | 0.753686 | 0.883904 | 5.87E-07 |
| Omnivores   | MULTIPLE SCHLEROSIS             | 0.837133 | 0.712437 | 0.983655 | 0.030753 |
| Omnivores   | MYOCARDIAL INFARCTION           | 1.134214 | 1.066613 | 1.206099 | 5.90E-05 |
| Omnivores   | OSTEOPOROSIS                    | 0.816134 | 0.773685 | 0.860912 | 8.95E-14 |
| Omnivores   | PARKINSONS DISEASE              | 1.098021 | 0.945323 | 1.275385 | 0.220955 |
| Omnivores   | PERIPHERAL VASCULAR DISEASE     | 0.904999 | 0.830611 | 0.986049 | 0.022546 |
| Omnivores   | PROSTATE PROBLEM                | 1.319027 | 1.266393 | 1.373849 | 0        |
| Omnivores   | RHEUMATOID ARTHRITIS            | 0.976151 | 0.902446 | 1.055877 | 0.546775 |
| Omnivores   | SCHIZOPHRENIA                   | 1.132172 | 0.898076 | 1.427288 | 0.29354  |
| Omnivores   | STROKE                          | 1.019511 | 0.963115 | 1.079209 | 0.505709 |
| Omnivores   | THYROID PROBLEM                 | 0.974965 | 0.93808  | 1.0133   | 0.197564 |
| Omnivores   | TUBERCULOSIS                    | 1.300761 | 0.797556 | 2.121453 | 0.292057 |
| Omnivores   | VESTIBULAR DISORDER             | 1.085742 | 0.980701 | 1.202034 | 0.113056 |
| Omnivores   | CONSTIPATION                    | 0.942509 | 0.900855 | 0.986089 | 0.010245 |
| Omnivores   | DYSPEPSIA                       | 0.982222 | 0.944346 | 1.021616 | 0.371276 |
| Omnivores   | HEARING LOSS                    | 1.077059 | 1.015495 | 1.142355 | 0.013435 |
| Omnivores   | DIVENTICULAR DISEASES OF INTEST | 1.049433 | 1.021358 | 1.078279 | 0.000487 |
| Omnivores   | ENDOMETRIOSIS                   | 0.942858 | 0.861824 | 1.031512 | 0.199381 |
| Sweet-tooth | ANAEMIA                         | 1.330717 | 1.265679 | 1.399096 | 0        |
| Sweet-tooth | ANGINA                          | 1.361683 | 1.300209 | 1.426063 | 0        |
| Sweet-tooth | ANXIETY                         | 1.218253 | 1.156546 | 1.283252 | 9.77E-14 |
| Sweet-tooth | ASTHMA                          | 1.18211  | 1.141427 | 1.224244 | 0        |
| Sweet-tooth | ATRIAL FIBRILLIATION            | 1.128381 | 1.082598 | 1.176099 | 1.09E-08 |
| Sweet-tooth | BRONCHIECTASIS                  | 1.23275  | 1.1155   | 1.362324 | 4.07E-05 |
| Sweet-tooth | CANCER                          | 0.987645 | 0.961089 | 1.014935 | 0.371343 |
| Sweet-tooth | CHRONIC KIDNEY DISEASE          | 1.452583 | 1.374943 | 1.534607 | 0        |
| Sweet-tooth | CHRONIC OBSTRUCTIVE PULMONAR    | 1.610756 | 1.511818 | 1.716168 | 0        |
| Sweet-tooth | CHRONIC SINUSITIS               | 1.138384 | 1.023102 | 1.266656 | 0.017347 |
| Sweet-tooth | CIRRHOSIS                       | 1.774385 | 1.489346 | 2.113977 | 1.38E-10 |

|             |                                 |          |          |          |          |
|-------------|---------------------------------|----------|----------|----------|----------|
| Sweet-tooth | DEMENTIA                        | 1.660764 | 1.346207 | 2.04882  | 2.19E-06 |
| Sweet-tooth | DEPRESSION                      | 1.318925 | 1.259012 | 1.381689 | 0        |
| Sweet-tooth | DIABETES                        | 1.50504  | 1.444115 | 1.568534 | 0        |
| Sweet-tooth | ECZEMA OR DERMATITIS            | 1.210976 | 1.081591 | 1.355839 | 0.000899 |
| Sweet-tooth | EPILEPSY                        | 1.333331 | 1.202767 | 1.478068 | 4.47E-08 |
| Sweet-tooth | GLAUCOMA                        | 1.04012  | 0.977504 | 1.106747 | 0.214331 |
| Sweet-tooth | HEART FAILURE                   | 1.376481 | 1.287289 | 1.471853 | 0        |
| Sweet-tooth | HEPATITIS                       | 1.387143 | 1.117291 | 1.72217  | 0.003029 |
| Sweet-tooth | HYPERTENSION                    | 1.192763 | 1.165921 | 1.220223 | 0        |
| Sweet-tooth | INFLAMMATORY BOWEL DISEASE      | 1.174368 | 1.123708 | 1.227312 | 9.05E-13 |
| Sweet-tooth | IRRITABLE BOWEL SYNDROME        | 1.300418 | 1.222809 | 1.382953 | 0        |
| Sweet-tooth | MENINGITIS                      | 1.143117 | 0.798005 | 1.637478 | 0.46572  |
| Sweet-tooth | MIGRAINE                        | 1.243936 | 1.14899  | 1.346728 | 7.11E-08 |
| Sweet-tooth | MULTIPLE SCHLEROSIS             | 1.165402 | 0.990146 | 1.371679 | 0.065637 |
| Sweet-tooth | MYOCARDIAL INFARCTION           | 1.312562 | 1.232052 | 1.398333 | 0        |
| Sweet-tooth | OSTEOPOROSIS                    | 0.917577 | 0.867293 | 0.970777 | 0.002777 |
| Sweet-tooth | PARKINSONS DISEASE              | 1.360549 | 1.167647 | 1.585319 | 7.92E-05 |
| Sweet-tooth | PERIPHERAL VASCULAR DISEASE     | 1.282209 | 1.176092 | 1.397901 | 1.70E-08 |
| Sweet-tooth | PROSTATE PROBLEM                | 1.261072 | 1.208417 | 1.316021 | 0        |
| Sweet-tooth | RHEUMATOID ARTHRITIS            | 1.306215 | 1.206212 | 1.414509 | 4.91E-11 |
| Sweet-tooth | SCHIZOPHRENIA                   | 1.147274 | 0.899261 | 1.463687 | 0.268918 |
| Sweet-tooth | STROKE                          | 1.272282 | 1.200246 | 1.34864  | 6.66E-16 |
| Sweet-tooth | THYROID PROBLEM                 | 1.036131 | 0.994796 | 1.079184 | 0.087487 |
| Sweet-tooth | TUBERCULOSIS                    | 1.308894 | 0.787147 | 2.176469 | 0.299498 |
| Sweet-tooth | VESTIBULAR DISORDER             | 1.078131 | 0.967957 | 1.200844 | 0.171361 |
| Sweet-tooth | CONSTIPATION                    | 1.16381  | 1.110876 | 1.219265 | 1.69E-10 |
| Sweet-tooth | DYSPEPSIA                       | 1.20002  | 1.15236  | 1.249651 | 0        |
| Sweet-tooth | HEARING LOSS                    | 1.184907 | 1.114456 | 1.259813 | 5.80E-08 |
| Sweet-tooth | DIVENTICULAR DISEASES OF INTEST | 1.149    | 1.116829 | 1.182098 | 0        |
| Sweet-tooth | ENDOMETRIOSIS                   | 0.991398 | 0.90133  | 1.090467 | 0.858899 |

Note: the p-values associated with these RRs were two-tailed, considering both directions of effect

Supplementary Table 12: Medical History, medication, and supplement taken for each food preference groups

|                                                                           | Health-conscious<br>(n = 58,909) | Omnivore<br>(n = 72,286) | Sweet-tooth<br>(n = 50,543) | p-value |
|---------------------------------------------------------------------------|----------------------------------|--------------------------|-----------------------------|---------|
| <b>Medical history</b>                                                    |                                  |                          |                             |         |
| Diabetes                                                                  | 1,487 (2.5%)                     | 2,200 (3.0%)             | 2,085 (4.1%)                | < 0.001 |
| Heart attack                                                              | 460 (0.8%)                       | 1,066 (1.5%)             | 824 (1.6%)                  | < 0.001 |
| Angina                                                                    | 513 (0.9%)                       | 1,111 (1.5%)             | 852 (1.7%)                  | < 0.001 |
| Stroke                                                                    | 356 (0.6%)                       | 541 (0.7%)               | 471 (0.9%)                  | < 0.001 |
| High blood pressure                                                       | 10,557 (18%)                     | 16,128 (22%)             | 11,150 (22%)                | < 0.001 |
| <b>Medication</b>                                                         |                                  |                          |                             |         |
| Blood pressure medication                                                 | 435 (4.5%)                       | 493 (4.1%)               | 339 (4.1%)                  |         |
| Cholesterol lowering medication                                           | 224 (2.3%)                       | 225 (1.9%)               | 176 (2.1%)                  |         |
| Insulin                                                                   | 6 (<0.1%)                        | 9 (<0.1%)                | 3 (<0.1%)                   |         |
| Combination                                                               |                                  |                          |                             |         |
| Blood pressure medication AND Cholesterol lowering medication             | 216 (2.2%)                       | 274 (2.3%)               | 208 (2.5%)                  |         |
| Blood pressure medication AND Insulin                                     | 0 (0%)                           | 0 (0%)                   | 4 (<0.1%)                   |         |
| Cholesterol lowering medication AND Insulin                               | 8 (<0.1%)                        | 4 (<0.1%)                | 5 (<0.1%)                   |         |
| Blood pressure medication AND Cholesterol lowering medication AND Insulin | 12 (0.1%)                        | 5 (<0.1%)                | 11 (0.1%)                   |         |
| Other (Hormone replacement therapy, Oral contraceptive pill)              | 424 (4.4%)                       | 370 (3.1%)               | 275 (3.3%)                  |         |
| Combination with other medication                                         | 98 (1.0%)                        | 79 (0.6%)                | 83 (1.0%)                   |         |
| <b>Supplement</b>                                                         |                                  |                          |                             |         |
| vitamin                                                                   |                                  |                          |                             | <0.001  |
| no                                                                        | 49,155 (83%)                     | 63,135 (87%)             | 43,620 (86%)                |         |
| yes                                                                       | 9,748 (17%)                      | 9,147 (13%)              | 6,915 (14%)                 |         |
| multivitamin_minerals                                                     |                                  |                          |                             | <0.001  |
| no                                                                        | 43,930 (75%)                     | 57,335 (79%)             | 38,876 (77%)                |         |
| yes                                                                       | 14,973 (25%)                     | 14,947 (21%)             | 11,659 (23%)                |         |
| fish_oil                                                                  |                                  |                          |                             | <0.001  |
| no                                                                        | 38,866 (66%)                     | 48,791 (68%)             | 35,829 (71%)                |         |
| yes                                                                       | 20,037 (34%)                     | 23,491 (32%)             | 14,706 (29%)                |         |
| glucosamine                                                               |                                  |                          |                             | <0.001  |
| no                                                                        | 44,693 (76%)                     | 57,290 (79%)             | 41,200 (82%)                |         |
| yes                                                                       | 14,210 (24%)                     | 14,992 (21%)             | 9,335 (18%)                 |         |
| calcium                                                                   |                                  |                          |                             | <0.001  |
| no                                                                        | 52,960 (90%)                     | 68,039 (94%)             | 47,171 (93%)                |         |
| yes                                                                       | 5,943 (10%)                      | 4,243 (5.9%)             | 3,364 (6.7%)                |         |

|          |              |              |              |        |
|----------|--------------|--------------|--------------|--------|
| zinc     |              |              |              | <0.001 |
| no       | 55,519 (94%) | 69,599 (96%) | 48,330 (96%) |        |
| yes      | 3,384 (5.7%) | 2,683 (3.7%) | 2,205 (4.4%) |        |
| iron     |              |              |              | <0.001 |
| no       | 56,514 (96%) | 70,481 (98%) | 48,731 (96%) |        |
| yes      | 2,389 (4.1%) | 1,801 (2.5%) | 1,804 (3.6%) |        |
| selenium |              |              |              | <0.001 |
| no       | 56,839 (96%) | 70,596 (98%) | 49,252 (97%) |        |
| yes      | 2,064 (3.5%) | 1,686 (2.3%) | 1,283 (2.5%) |        |

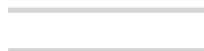

<sup>1</sup> n (%)

<sup>2</sup> Pearson's Chi-squared test

---
