# Supplementary material for: Artificial intelligence driven definition of food preference endotypes in UK Biobank volunteers is associated with distinctive health outcomes and blood based metabolomic and proteomic profiles
Source: Springer Nature journal article supplement (doi:10.1186/s12967-024-05663-0), 2024-10-01
Supplement: 12967_2024_5663_MOESM3_ESM.pdf [file 12967_2024_5663_MOESM3_ESM.pdf]

Supplementary Table 8: Limma differential expression for proteomics data

## Health-conscious vs Omnivore

|          | logFC       | AveExpr     | t           | P.Value      | adj.P.Val    | B           | protein_type |
|----------|-------------|-------------|-------------|--------------|--------------|-------------|--------------|
| LEP      | -0.31393858 | -0.17409801 | -14.9368917 | 4.2723683661 | 1.2475315629 | 102.907714  | down         |
| APCS     | -0.10530101 | -0.08561453 | -13.7799842 | 6.0604024717 | 8.8481876087 | 86.63126599 | ns           |
| CFH      | -0.06874826 | -0.04566867 | -12.8292747 | 1.7940650014 | 1.7462232680 | 74.18468187 | ns           |
| GHR      | -0.07238536 | -0.02835094 | -11.5937799 | 5.9870165991 | 4.3705221173 | 59.3688597  | ns           |
| CFI      | -0.05039995 | -0.0294017  | -11.496479  | 1.8262666735 | 1.0665397373 | 58.26804843 | ns           |
| HGF      | -0.0887776  | -0.04313962 | -11.4416886 | 3.4190665349 | 1.6639457136 | 57.64963038 | ns           |
| SERPINF1 | -0.06236418 | -0.03790164 | -11.1321889 | 1.1280133632 | 4.7054271723 | 54.2049789  | ns           |
| FABP4    | -0.13832311 | -0.0562609  | -10.9125914 | 1.2645848923 | 4.6157348570 | 51.82219129 | down         |
| RARRES2  | -0.11859941 | -0.0752127  | -10.8821423 | 1.7657899375 | 5.7290073528 | 51.4941138  | ns           |
| IL1RN    | -0.13524294 | -0.00163616 | -10.7464012 | 7.6820575370 | 2.2431608008 | 50.04661203 | down         |
| CD99L2   | -0.05479181 | -0.01799669 | -10.471208  | 1.4281200537 | 3.7910095972 | 47.16834913 | ns           |
| CFB      | -0.07267368 | -0.0487602  | -10.2567507 | 1.3276801387 | 3.1408269593 | 44.97563285 | ns           |
| SSC4D    | -0.27004079 | 0.095505149 | -10.2515852 | 1.3983133722 | 3.1408269593 | 44.92374118 | down         |
| ORM1     | -0.04167374 | -0.00760453 | -10.2059765 | 2.2281577557 | 4.6473004619 | 44.4638033  | ns           |
| IL18R1   | -0.07396011 | -0.03755503 | -10.0952175 | 6.8729948272 | 1.3379429930 | 43.35451606 | ns           |
| F9       | -0.04102981 | -0.02595323 | -10.0518494 | 1.0676461809 | 1.9484542803 | 42.9232888  | ns           |
| FSTL3    | -0.06588597 | -0.0245828  | -10.0231457 | 1.4257566688 | 2.4489467488 | 42.63917694 | ns           |
| OSM      | -0.15736491 | -0.07276487 | -10.0001068 | 1.7974751655 | 2.9159041574 | 42.41127528 | down         |
| SERPIND1 | -0.05794929 | -0.03243131 | -9.99001702 | 1.9851067267 | 3.0507956011 | 42.31212739 | ns           |
| ADM      | -0.06124972 | -0.05568744 | -9.8340568  | 9.3606152734 | 1.3666498299 | 40.78571354 | ns           |
| CKB      | 0.125943441 | 0.014531382 | 9.821192684 | 1.0631172753 | 1.4782392589 | 40.66126853 | ns           |
| IGFBP2   | 0.14375176  | -0.02548447 | 9.773703331 | 1.6961047397 | 2.2511935636 | 40.20196405 | up           |
| STC1     | -0.08724617 | -0.02194037 | -9.38454961 | 7.1770211131 | 9.1116963696 | 36.52069379 | ns           |
| INHBC    | -0.09074493 | -0.10462579 | -9.32562683 | 1.2506607840 | 1.5216372872 | 35.97715877 | ns           |
| CPM      | -0.07356868 | -0.0439586  | -9.29483591 | 1.6678238748 | 1.9480182858 | 35.693427   | ns           |
| FURIN    | -0.07279442 | -0.04240017 | -9.25460688 | 2.4270574857 | 2.7257722532 | 35.32528851 | ns           |
| ADAMTS15 | -0.09148524 | -0.04762613 | -9.238886   | 2.8122369697 | 3.0413822043 | 35.18254429 | ns           |
| BPIFB2   | -0.12394538 | 0.05996641  | -9.22006455 | 3.3450925086 | 3.4884536161 | 35.00976336 | ns           |
| SEMA3F   | -0.05297249 | -0.02214061 | -9.21227351 | 3.5997485891 | 3.6245744415 | 34.93999762 | ns           |
| CLEC4D   | -0.12197123 | -0.05301058 | -9.19714956 | 4.1397199751 | 4.0293274424 | 34.80181562 | ns           |
| ITH4     | -0.04726545 | 0.006965556 | -9.14966126 | 6.4095565826 | 6.0373887810 | 34.37084208 | ns           |
| TGFA     | -0.08908901 | 0.008263632 | -9.13449906 | 7.3771606559 | 6.7316590985 | 34.23455928 | ns           |
| NHLRC3   | -0.05859318 | -0.04392814 | -9.08300334 | 1.1879093887 | 1.0511198227 | 33.77606571 | ns           |
| LILRA5   | -0.06491803 | -0.05301764 | -9.06951741 | 1.3383924051 | 1.1494428891 | 33.65107406 | ns           |
| RTN4R    | -0.06819992 | -0.03712188 | -8.89220369 | 6.6401486846 | 5.5397811883 | 32.07527708 | ns           |
| NTRK3    | 0.042379584 | 0.014814134 | 8.881865565 | 7.2845792929 | 5.9086032043 | 31.98470647 | ns           |
| LGALS9   | -0.06136941 | -0.04005442 | -8.75170823 | 2.3176199842 | 1.8290406362 | 30.85284385 | ns           |
| SHBG     | 0.094192974 | 0.033412638 | 8.696687039 | 3.7558439579 | 2.8860695676 | 30.37689099 | ns           |
| DDC      | 0.087644464 | 0.041972203 | 8.586204403 | 9.8453986252 | 7.3714266630 | 29.43495795 | ns           |
| ASGR1    | -0.05634839 | -0.04427822 | -8.57187436 | 1.1145718193 | 8.1363742810 | 29.31348028 | ns           |
| MPO      | -0.08542623 | -0.00808592 | -8.49907647 | 2.0846302884 | 1.4846635225 | 28.69809744 | ns           |
| CD300A   | -0.04983107 | -0.01863664 | -8.47223103 | 2.6265279479 | 1.8260622876 | 28.47638822 | ns           |
| BGLAP    | -0.14400081 | -0.05549405 | -8.41068619 | 4.4281441397 | 3.0070188111 | 27.95801033 | down         |
| GUCA2A   | 0.056370907 | 0.007761604 | 8.275440622 | 1.3847174273 | 9.1894883811 | 26.84493536 | ns           |
| GFRA1    | -0.04711645 | -0.0221911  | -8.26655173 | 1.4896899861 | 9.6664327992 | 26.76896505 | ns           |
| CST3     | -0.04729642 | -0.04064463 | -8.17266432 | 3.2506326462 | 2.0634450710 | 26.00850251 | ns           |
| TNFRSF1A | -0.04785216 | -0.02483846 | -8.1447195  | 4.0916214996 | 2.5420286763 | 25.78222084 | ns           |
| CDHR5    | -0.07051791 | -0.06542682 | -8.07150389 | 7.4563852606 | 4.5359677002 | 25.19622574 | ns           |
| CLMP     | -0.03739035 | -0.01790542 | -8.0413379  | 9.5232828622 | 5.6750991750 | 24.95226647 | ns           |
| CNTN3    | -0.05769752 | -0.041332   | -8.03238018 | 1.0249064286 | 5.9854535431 | 24.88351515 | ns           |
| FAM20A   | -0.04631034 | -0.04298675 | -8.02897765 | 1.0530482520 | 6.0292174430 | 24.85479414 | ns           |
| EZR      | -0.04281365 | -0.02376248 | -7.99728536 | 1.3611585994 | 7.6434290583 | 24.60312389 | ns           |
| CSF1     | -0.04435398 | -0.0134698  | -7.95452347 | 1.9224215322 | 1.0591454479 | 24.26751112 | ns           |
| IGFBP1   | 0.227280632 | 0.008823951 | 7.945157548 | 2.0721410327 | 1.1204910769 | 24.19271774 | up           |
| C3       | -0.07682246 | -0.00887647 | -7.94179333 | 2.1369942660 | 1.1345496830 | 24.17932998 | ns           |
| MFAP5    | -0.07038582 | -0.03717505 | -7.92641023 | 2.4083063820 | 1.2557597563 | 24.0450956  | ns           |
| CHCHD10  | -0.06137828 | -0.04371587 | -7.89756345 | 3.0337835484 | 1.5541487651 | 23.81974174 | ns           |
| AMBAP    | -0.03306156 | -0.03425718 | -7.86656454 | 3.8844063612 | 1.9555976853 | 23.5772611  | ns           |
| CEACAM8  | -0.08207342 | -0.03628282 | -7.8608892  | 4.0712115945 | 2.0149047213 | 23.53966978 | ns           |
| ITGA5    | -0.04235312 | -0.02706417 | -7.84087405 | 4.7665831645 | 2.3197371400 | 23.38001839 | ns           |
| RETN     | -0.06857596 | -0.01707067 | -7.81955649 | 5.6463916113 | 2.7028628696 | 23.21712479 | ns           |
| A1BG     | -0.02722322 | -0.02054699 | -7.8156026  | 5.8199391592 | 2.7410036040 | 23.18261308 | ns           |

|         |             |             |             |              |              |             |      |
|---------|-------------|-------------|-------------|--------------|--------------|-------------|------|
| PGLYRP1 | -0.07051884 | -0.00844634 | -7.79797117 | 6.6917435033 | 3.1015700047 | 23.0476259  | ns   |
| VWC2    | -0.0641688  | -0.04137541 | -7.78224611 | 7.5814397425 | 3.4590318825 | 22.92963677 | ns   |
| RNASE6  | -0.04311633 | -0.02731617 | -7.76797521 | 8.4774063110 | 3.8083117581 | 22.81783035 | ns   |
| PALM2   | -0.05969522 | -0.01341872 | -7.75175438 | 9.6236640817 | 4.2577422906 | 22.69093416 | ns   |
| RELT    | -0.04343376 | -0.03067685 | -7.73984852 | 1.0570644526 | 4.6069077639 | 22.60137615 | ns   |
| CCL22   | -0.08587767 | -0.04447282 | -7.73266253 | 1.1190561279 | 4.8053586672 | 22.54988038 | ns   |
| PZP     | -0.08448365 | 0.208852998 | -7.69589583 | 1.4894843766 | 6.3033251880 | 22.2639796  | ns   |
| MMP9    | -0.10208809 | -0.07186344 | -7.67269845 | 1.7852183582 | 7.4450397324 | 22.08990524 | ns   |
| SLC39A5 | -0.08897319 | -0.06035542 | -7.6708975  | 1.8102665102 | 7.4450397324 | 22.07577862 | ns   |
| LCAT    | -0.03566743 | -0.02928045 | -7.66860173 | 1.8419009668 | 7.4699316989 | 22.05701884 | ns   |
| NOMO1   | -0.04019137 | -0.02945913 | -7.66197661 | 1.9398938489 | 7.7595753958 | 22.00802533 | ns   |
| PLAT    | -0.08842021 | -0.09331766 | -7.65739387 | 2.0095057044 | 7.9294008878 | 21.97225623 | ns   |
| MZB1    | -0.08309904 | -0.05932045 | -7.65282808 | 2.0823537768 | 8.1072973712 | 21.93869216 | ns   |
| LCN2    | -0.06023072 | -0.01664785 | -7.64749102 | 2.1756044125 | 8.3589011641 | 21.9078972  | ns   |
| BMP10   | 0.044115562 | 0.01137317  | 7.634811092 | 2.3962023846 | 9.0868973549 | 21.80720042 | ns   |
| TGFBR2  | -0.04803128 | -0.01406392 | -7.57195034 | 3.8842923612 | 1.4541197044 | 21.32867945 | ns   |
| F7      | -0.04957172 | -0.03198176 | -7.56539351 | 4.0862997683 | 1.5103791548 | 21.28149458 | ns   |
| GGH     | -0.05826794 | -0.04112374 | -7.52514998 | 5.5641960303 | 2.0309315510 | 20.98535171 | ns   |
| CCN5    | -0.06425045 | -0.03328942 | -7.52054335 | 5.7560077636 | 2.0750052678 | 20.94559285 | ns   |
| SIT1    | -0.09088575 | -0.022559   | -7.50586623 | 6.4425307218 | 2.2941694765 | 20.84149255 | ns   |
| PALM    | -0.04426399 | -0.01213568 | -7.49974319 | 6.7433785709 | 2.3723693285 | 20.79162651 | ns   |
| C1RL    | -0.02998284 | -0.02239994 | -7.48645148 | 7.4572519631 | 2.5922828252 | 20.69101421 | ns   |
| CRIP2   | -0.06000811 | -0.04293681 | -7.48354245 | 7.6286216158 | 2.6206558962 | 20.67264377 | ns   |
| PAG1    | -0.08889989 | -0.01126442 | -7.4568148  | 9.3464237256 | 3.1734368929 | 20.47811829 | ns   |
| CANT1   | -0.0317409  | -0.01148163 | -7.42297022 | 1.2054429608 | 4.0458545351 | 20.22546265 | ns   |
| IL6     | -0.11872306 | -0.00484653 | -7.39513972 | 1.4858070045 | 4.9033141952 | 20.02154581 | ns   |
| ADAM8   | -0.04481302 | -0.02241135 | -7.39427988 | 1.4945032992 | 4.9033141952 | 20.01155885 | ns   |
| RNASE4  | -0.039312   | -0.03006874 | -7.37662527 | 1.7088435681 | 5.5442480212 | 19.89167766 | ns   |
| CLEC6A  | -0.07353688 | -0.02380811 | -7.37406454 | 1.7413018542 | 5.5874740816 | 19.87126327 | ns   |
| SNCG    | -0.10811062 | -0.09860755 | -7.33883065 | 2.2631712760 | 7.1831088326 | 19.61125552 | ns   |
| BOC     | 0.037186632 | 0.00589777  | 7.317863261 | 2.6466492068 | 8.3099093375 | 19.4623676  | ns   |
| COLEC12 | -0.03970365 | -0.03369293 | -7.28758812 | 3.3094449392 | 1.0280403428 | 19.2398787  | ns   |
| GPD1    | -0.08078794 | 0.002666076 | -7.26847774 | 3.8096207295 | 1.1709571084 | 19.09920094 | ns   |
| OXT     | -0.2262838  | 0.000105097 | -7.1493131  | 9.1104960233 | 2.7711092070 | 18.247644   | down |
| IGSF9   | -0.12628387 | -0.0458287  | -7.14515908 | 9.3898686174 | 2.8266408621 | 18.21881651 | ns   |
| RNASE1  | -0.03366809 | -0.01455021 | -7.14340653 | 9.5102660424 | 2.8336711065 | 18.20716174 | ns   |
| CDHR2   | -0.12116805 | -0.17423928 | -7.13814648 | 9.8851175796 | 2.9156104376 | 18.17311    | ns   |
| DDT     | -0.06057242 | 0.017563997 | -7.10615287 | 1.2452742465 | 3.6362007998 | 17.94388761 | ns   |
| GUSB    | -0.09365998 | -0.04504515 | -7.10253766 | 1.2784472231 | 3.6961048432 | 17.91990209 | ns   |
| COL6A3  | -0.04971354 | -0.03672984 | -7.0878987  | 1.4203174090 | 4.0660067003 | 17.81503226 | ns   |
| PGF     | -0.03638396 | -0.02196675 | -7.08384011 | 1.4623423797 | 4.1456696591 | 17.78624545 | ns   |
| SFRP1   | -0.06518951 | -0.05033451 | -7.0821585  | 1.4814838862 | 4.1595509114 | 17.78081905 | ns   |
| VSIG4   | -0.05957065 | -0.04366268 | -7.06059553 | 1.7289219578 | 4.8080496352 | 17.62640794 | ns   |
| LILRB4  | -0.06518645 | -0.03482651 | -7.02553097 | 2.2236714116 | 6.1053655036 | 17.3875893  | ns   |
| YAP1    | -0.03709568 | -0.01888789 | -7.02375766 | 2.2496121810 | 6.1053655036 | 17.36745968 | ns   |
| CLEC4G  | -0.05093279 | -0.01516147 | -7.02328493 | 2.2581488849 | 6.1053655036 | 17.3664057  | ns   |
| CD83    | -0.04916672 | -0.0265991  | -7.01884109 | 2.3308975858 | 6.2442394044 | 17.33551491 | ns   |
| PLTP    | 0.05501556  | 0.006951874 | 7.000414872 | 2.6571513089 | 7.0535289291 | 17.20619755 | ns   |
| PON3    | 0.042475101 | 0.001823046 | 6.985257754 | 2.9596595078 | 7.7857709575 | 17.10196473 | ns   |
| LDLR    | -0.08353745 | -0.04661866 | -6.96387989 | 3.4440473496 | 8.9791234473 | 16.95416338 | ns   |
| RBP7    | -0.08598111 | 0.042330818 | -6.95687438 | 3.6186422304 | 9.3508277106 | 16.90516704 | ns   |
| LGALS1  | -0.05013377 | -0.03511353 | -6.93455813 | 4.2380084830 | 1.0855249798 | 16.7547188  | ns   |
| CA14    | 0.053839149 | 0.057241502 | 6.922334501 | 4.6166999562 | 1.1722403367 | 16.66595345 | ns   |
| DPT     | -0.04117202 | -0.06173397 | -6.91001832 | 5.0345747412 | 1.2673239865 | 16.58226433 | ns   |
| VEGFB   | -0.04025599 | -0.0276868  | -6.88525472 | 5.9969374459 | 1.4966715677 | 16.42271471 | ns   |
| RIDA    | -0.07026283 | 0.006284974 | -6.87323595 | 6.5212393319 | 1.6137304109 | 16.33970491 | ns   |
| SKAP1   | -0.11042308 | -0.01034146 | -6.84825982 | 7.7613563979 | 1.9044672841 | 16.16712405 | ns   |
| GOLM2   | -0.03321434 | -0.02292632 | -6.83548255 | 8.4777433702 | 2.0629175534 | 16.07471757 | ns   |
| DSG2    | 0.039182433 | 0.024864908 | 6.813761071 | 9.8612672097 | 2.3797438225 | 15.93092382 | ns   |
| COL4A1  | 0.058382563 | 0.018352175 | 6.807162967 | 1.0324174673 | 2.4710319711 | 15.88800586 | ns   |
| NOS3    | -0.07608106 | -0.03188146 | -6.78935442 | 1.1684626701 | 2.7739113795 | 15.77257371 | ns   |
| FGA     | -0.04264903 | -0.01775554 | -6.77189463 | 1.3179716330 | 3.1036106196 | 15.65478685 | ns   |
| FCAMR   | -0.10021236 | -0.02923245 | -6.74274458 | 1.6091835030 | 3.7514223681 | 15.45177707 | ns   |
| CRELD1  | -0.05127048 | -0.04364029 | -6.74199419 | 1.6187644465 | 3.7514223681 | 15.45510183 | ns   |
| GDF2    | 0.052132574 | 0.019448341 | 6.719252593 | 1.8910517132 | 4.3418301151 | 15.29923552 | ns   |
| BAIAP2  | -0.09167438 | -0.01061989 | -6.71840081 | 1.9032679956 | 4.3418301151 | 15.2982022  | ns   |

|          |             |              |             |              |              |             |    |
|----------|-------------|--------------|-------------|--------------|--------------|-------------|----|
| IGFBP4   | -0.05581948 | -0.04467782  | -6.70078474 | 2.1458427212 | 4.8572563922 | 15.17827966 | ns |
| CFP      | -0.03094189 | -0.0121674   | -6.69412194 | 2.2442217623 | 5.0408673431 | 15.12839396 | ns |
| LRIG1    | -0.04915186 | -0.02725682  | -6.6658644  | 2.7200652377 | 6.0630461787 | 14.94111931 | ns |
| CCL16    | -0.07501758 | -0.12633205  | -6.66225238 | 2.7873959037 | 6.1660576052 | 14.91706507 | ns |
| MMP8     | -0.10553875 | -0.03214886  | -6.64868413 | 3.0561513184 | 6.7097457517 | 14.82792434 | ns |
| COL15A1  | -0.03443774 | -0.01423475  | -6.63335995 | 3.3900627566 | 7.3873009324 | 14.72746631 | ns |
| SSC5D    | -0.06326399 | -0.05329165  | -6.6229667  | 3.6375739745 | 7.8679377820 | 14.66195997 | ns |
| COL18A1  | -0.03217347 | -0.03496446  | -6.60559321 | 4.0894490839 | 8.7802877390 | 14.54859282 | ns |
| APOA2    | 0.063496279 | -0.00634954  | 6.597330321 | 4.3220937588 | 9.2120538509 | 14.4919093  | ns |
| FRZB     | -0.03676118 | -0.03604365  | -6.59496439 | 4.3938683659 | 9.2971707452 | 14.48175042 | ns |
| CD300C   | -0.04715706 | -0.02114561  | -6.58851817 | 4.5854825161 | 9.6328121921 | 14.43292515 | ns |
| CD302    | -0.03977051 | -0.0288168   | -6.56592182 | 5.3377943366 | 1.1133113902 | 14.29071385 | ns |
| CREG1    | -0.05368223 | -0.00221972  | -6.5524097  | 5.8441911516 | 1.2102863945 | 14.20570773 | ns |
| CTSO     | -0.0429205  | -0.0237383   | -6.54272833 | 6.2296163028 | 1.2786792458 | 14.13502068 | ns |
| ADAMTS8  | 0.06319738  | 0.03360228   | 6.541979081 | 6.2620250739 | 1.2786792458 | 14.13237463 | ns |
| FCN1     | -0.07359025 | -0.06135624  | -6.53118507 | 6.7290775197 | 1.3645073859 | 14.06255331 | ns |
| SERPINA3 | -0.01868434 | -0.00450974  | -6.49593527 | 8.5045845935 | 1.7126473802 | 13.83503356 | ns |
| AHNAK    | -0.04215194 | -0.01915085  | -6.48969621 | 8.8694217713 | 1.7738843542 | 13.8026324  | ns |
| CD300E   | -0.05542135 | -0.02326622  | -6.47391762 | 9.8371119643 | 1.9540385670 | 13.69200163 | ns |
| LAMP3    | -0.07283832 | -0.04649444  | -6.43374328 | 1.2814840355 | 2.5283333673 | 13.43494967 | ns |
| CFD      | -0.02464755 | -0.01534626  | -6.41703402 | 1.4298988264 | 2.8022178344 | 13.32906318 | ns |
| CSF3R    | -0.03607187 | -0.0081714   | -6.4013869  | 1.5853680602 | 3.0861831572 | 13.2397372  | ns |
| PLAUR    | -0.03623183 | -0.03703801  | -6.36410005 | 2.0206893306 | 3.9075581758 | 13.00071659 | ns |
| IFI30    | -0.04951007 | -0.04655162  | -6.34318089 | 2.3147575185 | 4.4467710225 | 12.87001008 | ns |
| NPC2     | -0.03830631 | -0.03478036  | -6.32457006 | 2.6103140932 | 4.9817759165 | 12.75146148 | ns |
| PRCP     | -0.04318492 | -0.04334977  | -6.31993826 | 2.6884691950 | 5.0976169153 | 12.71788744 | ns |
| CD22     | -0.05633676 | -0.00931444  | -6.31832721 | 2.7161281425 | 5.1168349524 | 12.7054334  | ns |
| SMOC1    | -0.0442805  | -0.05614878  | -6.31654809 | 2.7475431637 | 5.1428372040 | 12.69394416 | ns |
| TREML2   | -0.04503292 | -0.00246043  | -6.28677642 | 3.3287535148 | 6.1676942079 | 12.51184864 | ns |
| HSPG2    | -0.03294035 | -0.01699601  | -6.28599016 | 3.3469069068 | 6.1676942079 | 12.51176598 | ns |
| EPHA1    | -0.04553235 | -0.0608638   | -6.28538775 | 3.3584362296 | 6.1676942079 | 12.50289638 | ns |
| PRAP1    | -0.05584985 | -0.09612293  | -6.28005055 | 3.4749333825 | 6.3417534230 | 12.46760142 | ns |
| FETUB    | -0.04614069 | -0.03306284  | -6.27742161 | 3.5349668381 | 6.4112442032 | 12.4545583  | ns |
| SORD     | -0.09283578 | -0.03154459  | -6.27364989 | 3.6207259246 | 6.5262467284 | 12.42804349 | ns |
| WFIKN2   | 0.048713918 | 0.029312183  | 6.26402323  | 3.8516157654 | 6.8998270154 | 12.37108285 | ns |
| QPCT     | -0.03567972 | -0.03056179  | -6.23618836 | 4.6010272834 | 8.1920729680 | 12.19910015 | ns |
| SMAD5    | -0.02746737 | -0.03768428  | -6.21085632 | 5.4058848943 | 9.5429809599 | 12.0437815  | ns |
| SHISA5   | -0.02911494 | -0.02141815  | -6.21024888 | 5.4251193128 | 9.5429809599 | 12.0356832  | ns |
| CD74     | -0.04523779 | -0.03293008  | -6.20820356 | 5.4957918372 | 9.6094084819 | 12.02213886 | ns |
| LMNB2    | -0.03368467 | -0.02366368  | -6.19747442 | 5.8827582632 | 1.0224794124 | 11.95706563 | ns |
| CD5      | -0.0446607  | -0.01939922  | -6.17791662 | 6.6575488239 | 1.1502983766 | 11.83619792 | ns |
| ADH4     | -0.11774517 | -0.03484316  | -6.15981552 | 7.4680397288 | 1.2827456475 | 11.73551225 | ns |
| CXCL13   | -0.07776076 | 0.01100087   | -6.14410879 | 8.2378477501 | 1.4066968088 | 11.62988482 | ns |
| APBB1IP  | -0.06216326 | 0.008427928  | -6.13678579 | 8.6283885977 | 1.4648194596 | 11.59070937 | ns |
| INHBB    | -0.06147362 | -0.02699148  | -6.10426686 | 1.0579238906 | 1.7856287633 | 11.3980846  | ns |
| C1S      | -0.02592139 | -0.01995883  | -6.09134634 | 1.1461143656 | 1.9233643377 | 11.31086742 | ns |
| IGFBP6   | -0.03553817 | -0.01031694  | -6.08395864 | 1.2006269268 | 2.0033317865 | 11.27295973 | ns |
| BCHE     | -0.03497072 | -0.02785392  | -6.07550293 | 1.2655940359 | 2.0997355595 | 11.2236517  | ns |
| CNTN1    | 0.035329603 | 0.024234468  | 6.070480086 | 1.3049891520 | 2.1528634599 | 11.18455054 | ns |
| GZMA     | -0.04492125 | -0.01291418  | -6.04961515 | 1.4852405049 | 2.4364619518 | 11.05886094 | ns |
| TNFRSF4  | -0.04585353 | -0.01322573  | -6.03415796 | 1.6342947305 | 2.6660003426 | 10.96677695 | ns |
| ITGAV    | 0.02091561  | -0.00060153  | 6.031032505 | 1.6661176259 | 2.7028130377 | 10.94726449 | ns |
| FN1      | -0.03233228 | -0.0144894   | -6.00444598 | 1.9627437505 | 3.1664153324 | 10.79004594 | ns |
| POLR2F   | -0.04448518 | -0.00156641  | -5.99972735 | 2.0210694459 | 3.2425949352 | 10.76661999 | ns |
| PAMR1    | -0.03742066 | -0.03393919  | -5.99728265 | 2.0514375029 | 3.2668552399 | 10.75007109 | ns |
| MAD1L1   | -0.06316837 | 9.3353285535 | -5.9955634  | 2.0737163472 | 3.2668552399 | 10.74365627 | ns |
| CCDC80   | -0.04381546 | -0.03987433  | -5.99499948 | 2.0805832938 | 3.2668552399 | 10.73831658 | ns |
| BST2     | -0.06489261 | 0.015131446  | -5.99492502 | 2.0809420364 | 3.2668552399 | 10.7325824  | ns |
| HSD11B1  | 0.052168357 | 0.013495465  | 5.973391729 | 2.3750641176 | 3.7086562693 | 10.60855179 | ns |
| HSPB6    | -0.04831713 | -0.02650018  | -5.96927049 | 2.4350912222 | 3.7821629622 | 10.58000315 | ns |
| ENPP6    | 0.045783348 | 0.036315162  | 5.965759532 | 2.4894832855 | 3.8357711155 | 10.57045043 | ns |
| PTS      | -0.0712963  | 0.018822638  | -5.96536016 | 2.4958784655 | 3.8357711155 | 10.56922662 | ns |
| CA6      | 0.082090851 | 0.055544365  | 5.95635131  | 2.6358000393 | 4.0219343222 | 10.50880454 | ns |
| IL12B    | -0.06922625 | -0.02336091  | -5.95575735 | 2.6445595543 | 4.0219343222 | 10.50051323 | ns |
| HAVCR1   | -0.07568739 | -0.07149016  | -5.95215186 | 2.7034818035 | 4.0902418997 | 10.4792787  | ns |
| LAIR1    | -0.04643503 | -0.03529584  | -5.93149413 | 3.0665178875 | 4.6155836246 | 10.3629689  | ns |

|             |             |             |             |              |              |             |    |
|-------------|-------------|-------------|-------------|--------------|--------------|-------------|----|
| CA5A        | -0.11741176 | -0.01591403 | -5.91133061 | 3.4668701713 | 5.1914158463 | 10.24964837 | ns |
| IL10RB      | -0.03536483 | -0.02621208 | -5.90663099 | 3.5652336754 | 5.3114705777 | 10.21462881 | ns |
| OLR1        | -0.07475463 | 0.012470295 | -5.89051034 | 3.9316409022 | 5.8276098652 | 10.127177   | ns |
| ADIPOQ      | 0.081098953 | 0.057234325 | 5.884837039 | 4.0666857917 | 5.9973346019 | 10.08537372 | ns |
| PCBD1       | -0.05584627 | 0.020059573 | -5.87297317 | 4.3703331855 | 6.4127502019 | 10.02662834 | ns |
| LSP1        | -0.05212219 | -0.01668445 | -5.86706484 | 4.5271178467 | 6.6095920562 | 9.984738399 | ns |
| CNTN4       | 0.029900402 | 0.008460208 | 5.838467989 | 5.3745527763 | 7.8078080133 | 9.818676926 | ns |
| FCAR        | -0.05973932 | -0.03028272 | -5.8324192  | 5.5728569677 | 8.0558130424 | 9.783883637 | ns |
| ADGRG2      | 0.034215201 | 0.033110771 | 5.824917759 | 5.8287283078 | 8.3841806202 | 9.742216316 | ns |
| IL12A_IL12B | -0.09553978 | -0.00296878 | -5.82112045 | 5.9625106788 | 8.5345741089 | 9.720514944 | ns |
| ADAM12      | -0.04045907 | 0.001891794 | -5.80013611 | 6.7592543237 | 9.6278159148 | 9.605937687 | ns |
| CALB2       | -0.03788039 | -0.00223921 | -5.79703391 | 6.8848495246 | 9.7591070932 | 9.586963772 | ns |
| SCARB2      | -0.03472246 | -0.02528381 | -5.78878468 | 7.2313563054 | 1.0200753822 | 9.540665038 | ns |
| SMNDC1      | -0.07278679 | 0.040771788 | -5.78711885 | 7.2990274408 | 1.0246711599 | 9.520994875 | ns |
| PLA2G2A     | -0.06959662 | 0.038841251 | -5.77948484 | 7.6389325642 | 1.0672575640 | 9.480610882 | ns |
| GSTA1       | -0.11140361 | -0.00775496 | -5.76905067 | 8.1259556034 | 1.1298947791 | 9.421251807 | ns |
| AOC3        | 0.037241435 | -0.00902145 | 5.755743623 | 8.7908030936 | 1.2165471579 | 9.343948905 | ns |
| HJV         | -0.05215504 | -0.01201012 | -5.75373198 | 8.8940297274 | 1.2250267360 | 9.32844597  | ns |
| ANGPTL2     | -0.05149416 | -0.03470297 | -5.74186037 | 9.5410802151 | 1.3068392216 | 9.26468127  | ns |
| TREM2       | -0.06272111 | -0.06070506 | -5.7412231  | 9.5775203228 | 1.3068392216 | 9.262438581 | ns |
| SFRP4       | -0.04797201 | 0.021823741 | -5.73465621 | 9.9574392571 | 1.3523591921 | 9.230217148 | ns |
| S100A11     | -0.05657537 | 0.026371865 | -5.72713772 | 1.0407214481 | 1.4069012168 | 9.185160822 | ns |
| SIGLEC8     | -0.05160535 | -0.03199942 | -5.71683958 | 1.1057787849 | 1.4879603925 | 9.129685844 | ns |
| NT5C1A      | -0.03652707 | -0.01621346 | -5.70638004 | 1.1751369579 | 1.5740366593 | 9.060278949 | ns |
| SERPINB8    | -0.06908599 | -0.01466746 | -5.69289997 | 1.2715689921 | 1.6954253228 | 8.98306606  | ns |
| SOST        | -0.04762427 | -0.03158784 | -5.6747853  | 1.4138177879 | 1.8765217912 | 8.887117495 | ns |
| CCL18       | -0.08819608 | -0.03386284 | -5.67258605 | 1.4323755940 | 1.8925505587 | 8.879384749 | ns |
| CDH17       | 0.082639825 | 0.068689641 | 5.650464293 | 1.6286489819 | 2.1421869491 | 8.75016323  | ns |
| ACVRL1      | -0.02784932 | -0.02774798 | -5.629768   | 1.8363419532 | 2.4045374454 | 8.635883934 | ns |
| CD72        | -0.04722631 | -0.01876961 | -5.61652568 | 1.9826116273 | 2.5844758714 | 8.565768123 | ns |
| CD4         | -0.03555799 | -0.02624323 | -5.60539104 | 2.1137006471 | 2.7431137286 | 8.498021908 | ns |
| BSG         | -0.02212194 | -0.0147872  | -5.58819286 | 2.3330685257 | 3.0144071217 | 8.39809419  | ns |
| IL16        | -0.05009851 | -0.03643258 | -5.58670727 | 2.3530047802 | 3.0267726688 | 8.389367499 | ns |
| KRT18       | -0.09770724 | -0.00335384 | -5.58246194 | 2.4116807204 | 3.0886437296 | 8.371814302 | ns |
| RBP5        | -0.06961416 | -0.0139115  | -5.56372719 | 2.6850241437 | 3.4236989082 | 8.268320686 | ns |
| GGT1        | -0.05805808 | 0.002610699 | -5.53901351 | 3.0918378746 | 3.9252898234 | 8.131004059 | ns |
| AGRN        | -0.03849993 | -0.02782697 | -5.53401325 | 3.1808746545 | 4.0208458836 | 8.101944767 | ns |
| F10         | -0.02886996 | -0.01711836 | -5.52917218 | 3.2695073481 | 4.1150695934 | 8.074136969 | ns |
| OCLN        | -0.04649976 | -0.03554469 | -5.51520887 | 3.5393059313 | 4.4355250298 | 7.996183835 | ns |
| NPPC        | -0.05262783 | -0.00057409 | -5.50811398 | 3.6853073969 | 4.5828008528 | 7.961195882 | ns |
| GSTA3       | -0.09399771 | 0.061480986 | -5.50803136 | 3.6882130151 | 4.5828008528 | 7.968185023 | ns |
| LGALS3BP    | -0.03368113 | 0.011790123 | -5.5059195  | 3.7308500076 | 4.6161364501 | 7.946200823 | ns |
| EFNA4       | -0.03224916 | -0.02651292 | -5.49013619 | 4.0804347541 | 5.0273710895 | 7.866371234 | ns |
| NT5E        | -0.06575944 | 0.037834143 | -5.4631707  | 4.7494460009 | 5.8270513961 | 7.715307082 | ns |
| FABP3       | -0.05451273 | -0.02465986 | -5.44880681 | 5.1483185592 | 6.2899958966 | 7.635892259 | ns |
| GLA         | -0.04210695 | -0.02396195 | -5.43309126 | 5.6243213910 | 6.8429243591 | 7.562163771 | ns |
| COCH        | -0.04954734 | -0.01111773 | -5.42389739 | 5.9188032684 | 7.1713301011 | 7.50163651  | ns |
| AZU1        | -0.09075996 | 0.066564546 | -5.4226731  | 5.9638212817 | 7.1960157614 | 7.513560994 | ns |
| FNDC1       | -0.05060898 | -0.03292912 | -5.41364373 | 6.2673740863 | 7.5311655688 | 7.446759063 | ns |
| CCL7        | -0.06989087 | -0.02767532 | -5.40720564 | 6.4973311244 | 7.7754946242 | 7.415241494 | ns |
| STAB2       | -0.03179322 | -0.03118137 | -5.39683367 | 6.8825247152 | 8.2028457830 | 7.356786007 | ns |
| DPP6        | 0.039109731 | 0.021483137 | 5.392378477 | 7.0563346356 | 8.3758118439 | 7.33784302  | ns |
| CD59        | -0.02455709 | -0.02144653 | -5.37814156 | 7.6408040431 | 9.0328533627 | 7.275856569 | ns |
| PARP1       | -0.06372404 | 0.039102978 | -5.36566815 | 8.1820891211 | 9.6337500942 | 7.193428695 | ns |
| EFNA1       | -0.02974588 | -0.01533742 | -5.36429095 | 8.2447399560 | 9.6442546611 | 7.186733979 | ns |
| CSTB        | -0.05004174 | -0.05140729 | -5.36405356 | 8.2570673469 | 9.6442546611 | 7.190959479 | ns |
| PROS1       | -0.02668351 | -0.01725959 | -5.3568797  | 8.5880896296 | 9.9909249874 | 7.143643262 | ns |
| LTBP3       | -0.06299079 | 0.009939478 | -5.35144307 | 8.8534549002 | 1.0247351446 | 7.125443009 | ns |
| HNMT        | -0.0549409  | -0.05734174 | -5.35025381 | 8.9105394789 | 1.0247351446 | 7.11624587  | ns |
| EGLN1       | -0.06137494 | 0.007027714 | -5.35015993 | 8.9137920119 | 1.0247351446 | 7.111050661 | ns |
| PRSS8       | -0.04710257 | -0.05488094 | -5.34741143 | 9.0505902213 | 1.0363813116 | 7.09903719  | ns |
| CXCL17      | -0.05065084 | -0.04873897 | -5.33434376 | 9.7234776252 | 1.1090841666 | 7.023137224 | ns |
| NCF2        | -0.09854042 | 0.06640549  | -5.31784208 | 1.0647973415 | 1.2098086526 | 6.940866244 | ns |
| ELOA        | -0.06388591 | 0.022069614 | -5.29210069 | 1.2258775964 | 1.3874273572 | 6.806751866 | ns |
| MEGF9       | -0.02376545 | -0.00403363 | -5.27850815 | 1.3200179649 | 1.4882055821 | 6.731617961 | ns |
| BPIFA2      | 0.118178642 | 0.132636422 | 5.252775174 | 1.5193563543 | 1.7009274345 | 6.620719475 | ns |

|             |             |             |             |              |              |             |    |
|-------------|-------------|-------------|-------------|--------------|--------------|-------------|----|
| TNFRSF14    | -0.03226067 | -0.0197507  | -5.25252017 | 1.5203495219 | 1.7009274345 | 6.598426443 | ns |
| FGR         | -0.06721624 | 0.049065703 | -5.24995571 | 1.5420189283 | 1.7185859812 | 6.592003438 | ns |
| TMPRSS5     | 0.044346445 | -0.00588975 | 5.245878927 | 1.5762852462 | 1.7500961669 | 6.568298822 | ns |
| CSF3        | -0.05615151 | -0.0016873  | -5.24069532 | 1.6212487146 | 1.7931993359 | 6.543720171 | ns |
| PRTN3       | -0.05245335 | -0.00236403 | -5.22342467 | 1.7801565943 | 1.9615310397 | 6.460527467 | ns |
| FTCD        | -0.09095753 | 0.059164144 | -5.21719238 | 1.8400123427 | 2.0198631732 | 6.412532958 | ns |
| LECT2       | -0.06825122 | -0.06099332 | -5.20671225 | 1.9467467746 | 2.1290264351 | 6.357029579 | ns |
| NPDC1       | -0.03149875 | -0.01434314 | -5.20256271 | 1.9909526964 | 2.1692469678 | 6.3407047   | ns |
| S100A12     | -0.08441179 | -0.022183   | -5.19480062 | 2.0759549570 | 2.2534529645 | 6.30394902  | ns |
| NBL1        | -0.02713684 | -0.01560759 | -5.19373118 | 2.0874082738 | 2.2561388848 | 6.29186246  | ns |
| HYOU1       | -0.02380583 | -0.01521823 | -5.19314255 | 2.0938823212 | 2.2561388848 | 6.286593531 | ns |
| GH1         | 0.205746206 | 0.313304763 | 5.172639159 | 2.3372727379 | 2.5091310274 | 6.187275692 | up |
| C19orf12    | -0.0696094  | 0.073978553 | -5.1718311  | 2.3478091388 | 2.5112097748 | 6.188425803 | ns |
| AMY2A       | 0.053322914 | 0.014897039 | 5.168611017 | 2.3895426100 | 2.5465198618 | 6.185006108 | ns |
| GDF15       | -0.04222535 | -0.05624946 | -5.15886608 | 2.5151158056 | 2.6705956918 | 6.110665563 | ns |
| BGN         | 0.131157622 | 0.192235778 | 5.151650791 | 2.6147271114 | 2.7663054947 | 6.08583056  | ns |
| ADH1B       | -0.07957948 | 0.054649693 | -5.14248342 | 2.7451064250 | 2.8937583975 | 6.037980713 | ns |
| THY1        | -0.02991281 | -0.01898924 | -5.12383747 | 3.0297290960 | 3.1823053814 | 5.931787708 | ns |
| CFHR5       | -0.04208062 | -0.05389789 | -5.11538493 | 3.1690132067 | 3.3166733203 | 5.896149022 | ns |
| CHRD1       | -0.03276097 | -0.02839594 | -5.10133172 | 3.4128442804 | 3.5591090353 | 5.82162825  | ns |
| GPR37       | -0.07013006 | -0.09750955 | -5.09373311 | 3.5532122094 | 3.6923059257 | 5.790659994 | ns |
| RBFOX3      | -0.03725568 | -0.03056084 | -5.07955192 | 3.8271263889 | 3.9628400906 | 5.70787521  | ns |
| EFEMP1      | -0.03305588 | -0.03396737 | -5.07609839 | 3.8977776634 | 4.0217352570 | 5.69564299  | ns |
| CNTN5       | 0.040138383 | 0.045766772 | 5.055866982 | 4.3334360137 | 4.4555046338 | 5.590327757 | ns |
| PROK1       | -0.06816058 | -0.09842003 | -5.05071189 | 4.4521709830 | 4.5359954875 | 5.567000355 | ns |
| CALCA       | -0.06582715 | 0.02962224  | -5.05067447 | 4.4534083548 | 4.5359954875 | 5.570318518 | ns |
| LRP1        | 0.029063639 | 0.014044627 | 5.050454202 | 4.4583243319 | 4.5359954875 | 5.567755002 | ns |
| NXP3        | 0.030875084 | 0.00862956  | 5.044782783 | 4.5932999374 | 4.6570957699 | 5.546246172 | ns |
| CD6         | -0.05808366 | -0.03912866 | -5.0435696  | 4.6208523118 | 4.6688196368 | 5.527502352 | ns |
| TNFRSF10A   | -0.03535982 | -0.04336158 | -5.02722299 | 5.0326855984 | 5.0673937750 | 5.45212445  | ns |
| DPY30       | -0.0650759  | -0.00910265 | -5.01973546 | 5.2317805685 | 5.2497591959 | 5.409219341 | ns |
| BID         | -0.07225411 | 0.014622055 | -5.0081837  | 5.5556211263 | 5.5556211263 | 5.354896847 | ns |
| CES1        | -0.08764159 | 0.040288191 | -5.00563497 | 5.6294456867 | 5.6102325615 | 5.342582172 | ns |
| C1R         | -0.01941815 | -0.00150595 | -5.00283931 | 5.7110661795 | 5.6722153891 | 5.325167843 | ns |
| PDGFC       | -0.03107596 | -0.00982866 | -4.99806772 | 5.8558516423 | 5.7963006087 | 5.312599268 | ns |
| GNLY        | -0.0559545  | -0.04255065 | -4.9969712  | 5.8877804965 | 5.8082158952 | 5.299053946 | ns |
| CRHBP       | -0.03025892 | -0.04154438 | -4.99059824 | 6.0852782754 | 5.9828325132 | 5.269431596 | ns |
| CTSZ        | -0.03379981 | -0.02756025 | -4.98583909 | 6.2368973572 | 6.1113222426 | 5.245942491 | ns |
| SERPINA5    | -0.03248073 | 0.018690177 | -4.98403732 | 6.2954442469 | 6.1480592646 | 5.238961368 | ns |
| FST         | -0.05460072 | 0.010201476 | -4.98209608 | 6.3581942920 | 6.1886424442 | 5.225507341 | ns |
| SCLY        | -0.05172656 | -0.00612037 | -4.97686409 | 6.5316881271 | 6.3363884821 | 5.196278902 | ns |
| TNFRSF11A   | -0.03908882 | -0.0354379  | -4.95672626 | 7.2446424384 | 7.0047536159 | 5.096327346 | ns |
| ACE2        | -0.05077885 | 0.018380216 | -4.95342763 | 7.3707797651 | 7.1031937010 | 5.091827713 | ns |
| CTSD        | -0.04148084 | 0.007988467 | -4.94134986 | 7.8467743850 | 7.5370332909 | 5.055269582 | ns |
| UPB1        | -0.09278785 | -0.00720081 | -4.92732854 | 8.4222523098 | 8.0632710638 | 4.953168195 | ns |
| IDUA        | -0.0484002  | -0.06730344 | -4.92256268 | 8.6295321464 | 8.2347169501 | 4.928569261 | ns |
| VNN2        | -0.04974856 | -0.07590843 | -4.91923413 | 8.7786308297 | 8.3497074993 | 4.919123433 | ns |
| MNDA        | -0.10605416 | 0.086793132 | -4.91587375 | 8.9302762471 | 8.4663657927 | 4.902498942 | ns |
| RNAS2T2     | -0.02681709 | -0.01705792 | -4.91043079 | 9.1805709499 | 8.6599275392 | 4.872630649 | ns |
| CPB2        | -0.02227    | -0.01355439 | -4.91014642 | 9.1937586889 | 8.6599275392 | 4.870936415 | ns |
| SELE        | -0.05569116 | -0.10645912 | -4.90744378 | 9.3207929391 | 8.7513554284 | 4.855708587 | ns |
| PI3         | -0.05588973 | -0.03348576 | -4.90607531 | 9.3885058386 | 8.7866785413 | 4.860738536 | ns |
| THBS4       | -0.04833387 | -0.02449886 | -4.89875386 | 9.7432899233 | 9.0895867655 | 4.81909933  | ns |
| FCN2        | -0.04448853 | -0.06413633 | -4.88720894 | 1.0331745303 | 9.6078650595 | 4.765043396 | ns |
| KIT         | 0.030779561 | 0.015016934 | 4.880955869 | 1.0663514127 | 9.8849083341 | 4.73193357  | ns |
| CCL20       | -0.08976374 | 0.014891783 | -4.87926783 | 1.0753625090 | 9.9368940705 | 4.718512967 | ns |
| HAVCR2      | -0.03533055 | -0.03890064 | -4.86929674 | 1.1310966245 | 1.0418934206 | 4.67444598  | ns |
| IL1RAP      | 0.047763778 | 0.143366245 | 4.868578966 | 1.1352056370 | 1.0423900817 | 4.670980057 | ns |
| CST7        | -0.10016563 | 0.069101993 | -4.86656004 | 1.1468537999 | 1.0497846695 | 4.662288471 | ns |
| TCTN3       | -0.02905369 | -0.02225449 | -4.86130716 | 1.1775637294 | 1.0745269030 | 4.632691599 | ns |
| DEFA1_DEFA1 | -0.05268357 | 0.009762663 | -4.83665143 | 1.3336287888 | 1.2131451911 | 4.530591114 | ns |
| MME         | -0.08262676 | 0.083099284 | -4.82858803 | 1.3883424093 | 1.2589937376 | 4.480992211 | ns |
| NCAM2       | 0.028967608 | 0.025691835 | 4.814715456 | 1.4881297069 | 1.3453061127 | 4.412341149 | ns |
| FCER2       | -0.05189116 | -0.0254095  | -4.81264965 | 1.5035769390 | 1.3550755129 | 4.402478785 | ns |
| IGSF8       | -0.03030636 | -0.02036144 | -4.80456951 | 1.5655494426 | 1.4065859607 | 4.36602186  | ns |
| REN         | -0.07061053 | -0.01075304 | -4.79647034 | 1.6300672311 | 1.4600602193 | 4.327462592 | ns |

|          |             |             |             |              |              |             |    |
|----------|-------------|-------------|-------------|--------------|--------------|-------------|----|
| SERPING1 | -0.01808208 | -0.01211803 | -4.79088468 | 1.6758919344 | 1.4965151219 | 4.297205866 | ns |
| ANXA2    | -0.06898489 | 0.022895266 | -4.78871105 | 1.6947473896 | 1.5046051810 | 4.302922486 | ns |
| LRP11    | -0.03540702 | -0.02729547 | -4.78859394 | 1.6952572074 | 1.5046051810 | 4.290026108 | ns |
| KRT5     | -0.04948554 | 0.027792833 | -4.76550658 | 1.9013777296 | 1.6824312032 | 4.186673158 | ns |
| CTSS     | -0.02539837 | -0.01793221 | -4.76143993 | 1.9447327855 | 1.7155950857 | 4.259506688 | ns |
| TNFRSF1B | -0.03491384 | -0.01985275 | -4.76022662 | 1.9513732881 | 1.7162680726 | 4.153618432 | ns |
| PILRA    | -0.04207748 | -0.07638171 | -4.75925148 | 1.9608096797 | 1.7193886681 | 4.149015043 | ns |
| ACHE     | 0.030852284 | 0.032052004 | 4.758156695 | 1.9717199074 | 1.7237790807 | 4.151538957 | ns |
| SLITRK1  | 0.032125441 | 0.037649771 | 4.755564188 | 1.9972898672 | 1.7393943430 | 4.141026235 | ns |
| WFDC2    | -0.03512849 | -0.01115656 | -4.75517616 | 2.0014948605 | 1.7393943430 | 4.148222535 | ns |
| MXRA8    | 0.029879685 | 0.034231663 | 4.74417748  | 2.1126569684 | 1.8305514385 | 4.085674761 | ns |
| PTP4A3   | -0.05009754 | 0.02628235  | -4.74331027 | 2.1218524051 | 1.8330795926 | 4.083314194 | ns |
| PLA2G1B  | 0.043027682 | 0.024443962 | 4.73005323  | 2.2644240716 | 1.9504773714 | 4.009333703 | ns |
| C4BPB    | -0.03929754 | 0.004697046 | -4.71834228 | 2.3985859474 | 2.0599620489 | 3.955344752 | ns |
| TNFSF14  | -0.05986866 | -0.01293491 | -4.70609772 | 2.5471888405 | 2.1796344546 | 3.902309585 | ns |
| MET      | 0.020181892 | 0.019595455 | 4.705623607 | 2.5528595325 | 2.1796344546 | 3.895510501 | ns |
| ENTR1    | -0.05536425 | 0.065945696 | -4.69588347 | 2.6779595689 | 2.2797789916 | 3.860285662 | ns |
| PLG      | -0.02092017 | -0.0213721  | -4.68603211 | 2.8099103713 | 2.3851564780 | 3.814958613 | ns |
| NUCB2    | -0.03772989 | -0.00627497 | -4.66888645 | 3.0537708380 | 2.5846408252 | 3.722592582 | ns |
| IFNLR1   | -0.03812138 | -0.01527757 | -4.65866664 | 3.2093658640 | 2.7084821742 | 3.67945971  | ns |
| FABP6    | 0.054156909 | 0.047857735 | 4.658012339 | 3.2200621915 | 2.7096776943 | 3.684037387 | ns |
| ANGPTL4  | -0.04556942 | -0.05190204 | -4.64511118 | 3.4270863026 | 2.8756011504 | 3.616737393 | ns |
| DCXR     | -0.05415097 | 0.019268869 | -4.6272862  | 3.7350137588 | 3.1249971850 | 3.533306623 | ns |
| ART3     | 0.032839064 | 0.031598704 | 4.619889878 | 3.8706407109 | 3.2292202502 | 3.501430748 | ns |
| PXN      | -0.05330033 | -0.0001078  | -4.6147112  | 3.9688787168 | 3.3017452572 | 3.485303035 | ns |
| RET      | -0.03916464 | -0.01237474 | -4.6132254  | 3.9968353041 | 3.3149843271 | 3.472633953 | ns |
| IMMT     | -0.04004818 | -0.00701378 | -4.61265456 | 4.0074981763 | 3.3149843271 | 3.465234856 | ns |
| XG       | -0.03023624 | -0.006128   | -4.6018715  | 4.2205008652 | 3.4813170978 | 3.41761919  | ns |
| RNF149   | -0.02682235 | -0.02630013 | -4.60103314 | 4.2382509108 | 3.4861106083 | 3.423031212 | ns |
| HMOX2    | -0.04615835 | 0.033659794 | -4.59953265 | 4.2688710986 | 3.5014335978 | 3.415951068 | ns |
| AMY2B    | 0.048389808 | 0.02244243  | 4.582468349 | 4.6346319560 | 3.7907914038 | 3.365740401 | ns |
| ARSA     | -0.04416228 | 0.019352267 | -4.57861648 | 4.7173230228 | 3.8476489460 | 3.312503083 | ns |
| ERI1     | -0.03128106 | 0.003819022 | -4.57442808 | 4.8127947142 | 3.9145851157 | 3.296694736 | ns |
| NBN      | -0.05042121 | 0.041310369 | -4.56661415 | 4.9958065305 | 4.0521541858 | 3.26617421  | ns |
| HHEX     | -0.0714251  | -0.03271949 | -4.56420674 | 5.0523839918 | 4.0865331212 | 3.244088589 | ns |
| ZHX2     | -0.03116056 | 0.027861721 | -4.56363374 | 5.0661814722 | 4.0865331212 | 3.241494372 | ns |
| CRLF1    | -0.02551403 | -0.00557887 | -4.54904488 | 5.4300959527 | 4.3680110693 | 3.17774073  | ns |
| ERBB4    | 0.02294811  | 0.011304172 | 4.544760392 | 5.5415153595 | 4.4453914422 | 3.157890458 | ns |
| CD8A     | -0.04822879 | -0.01229686 | -4.53884473 | 5.6988417165 | 4.5590733732 | 3.128556768 | ns |
| OGN      | -0.03837779 | -0.04045438 | -4.52617516 | 6.0511446745 | 4.8276891939 | 3.075694765 | ns |
| LBR      | -0.06713739 | 0.035417087 | -4.51974138 | 6.2373121381 | 4.9626570690 | 3.042722122 | ns |
| KLRD1    | -0.04498701 | -0.02532786 | -4.51702501 | 6.3176498514 | 5.0129178169 | 3.030380954 | ns |
| APLP1    | 0.04925737  | 0.060587433 | 4.51492044  | 6.3813150064 | 5.0497126880 | 3.027357717 | ns |
| LRCH4    | -0.06354616 | 0.028761743 | -4.51021192 | 6.5253049651 | 5.1497001346 | 3.013472198 | ns |
| C2       | -0.02322177 | -0.03676342 | -4.4898777  | 7.1783896016 | 5.6498376379 | 2.91453829  | ns |
| TXNDC15  | -0.02556961 | 0.000448018 | -4.47944675 | 7.5373991453 | 5.9164530926 | 2.865549973 | ns |
| SETMAR   | -0.03026154 | -0.01864916 | -4.47114119 | 7.8366030133 | 6.1348205895 | 2.834447106 | ns |
| TALDO1   | -0.04072337 | -0.00492585 | -4.45261759 | 8.5425670717 | 6.6695978206 | 2.746806353 | ns |
| S100A13  | -0.0312533  | -0.01072207 | -4.44782846 | 8.7364980812 | 6.8028198392 | 2.73664573  | ns |
| MSR1     | -0.04426823 | -0.07517273 | -4.44424188 | 8.8813822629 | 6.8815071065 | 2.707023333 | ns |
| APOM     | 0.025908064 | 0.01448561  | 4.444179174 | 8.8846855451 | 6.8815071065 | 2.712042236 | ns |
| BTN3A2   | -0.03523968 | -0.03912376 | -4.44260007 | 8.9500134660 | 6.9137670161 | 2.704155187 | ns |
| COQ7     | -0.03914351 | 0.063308906 | -4.43196167 | 9.4038452083 | 7.2451788940 | 2.66568678  | ns |
| PHOSPHO1 | -0.02766991 | -0.03324967 | -4.4284318  | 9.5579968091 | 7.3445659691 | 2.644444623 | ns |
| CELA2A   | 0.051924043 | 0.010258095 | 4.421945314 | 9.8482449709 | 7.5477363031 | 2.610122332 | ns |
| CXCL10   | -0.06408733 | 0.031406084 | -4.41261734 | 1.0282146043 | 7.8553299652 | 2.571325586 | ns |
| RSPO1    | -0.03269836 | -0.0177006  | -4.41218384 | 1.0303395125 | 7.8553299652 | 2.573201172 | ns |
| PROC     | -0.02421276 | -0.0123426  | -4.40595932 | 1.0603133703 | 8.0627995869 | 2.544271843 | ns |
| NPL      | -0.03945173 | -0.04347188 | -4.39992078 | 1.0901377066 | 8.2563587535 | 2.513392812 | ns |
| CD79B    | -0.0406551  | -0.02614915 | -4.39914396 | 1.0940212703 | 8.2563587535 | 2.509024273 | ns |
| PLIN1    | -0.03458647 | 0.007576662 | -4.39914284 | 1.0942502868 | 8.2563587535 | 2.521716939 | ns |
| CXCL16   | -0.02207586 | -0.020789   | -4.39613032 | 1.1093180229 | 8.3484758429 | 2.497177361 | ns |
| CCL21    | -0.0382039  | -0.03138217 | -4.39341528 | 1.1232835708 | 8.4318458273 | 2.487451612 | ns |
| C5       | -0.01320429 | -0.00710707 | -4.39203161 | 1.1304106665 | 8.4635875543 | 2.479170646 | ns |
| NECTIN2  | -0.02560536 | -0.01902468 | -4.38394599 | 1.1732671925 | 8.7619954025 | 2.449805075 | ns |
| SPINK2   | -0.03164226 | -0.02333042 | -4.37677892 | 1.2125241867 | 9.0320679218 | 2.423929835 | ns |

|             |             |             |             |              |              |             |    |
|-------------|-------------|-------------|-------------|--------------|--------------|-------------|----|
| ITGA11      | 0.032009786 | 0.015084387 | 4.375314776 | 1.2205760848 | 9.0689113685 | 2.409866688 | ns |
| CAPG        | -0.05592804 | -0.06983188 | -4.36921829 | 1.2551490415 | 9.3021198001 | 2.385680081 | ns |
| PTGDS       | -0.02591132 | -0.01244456 | -4.36848196 | 1.2594494089 | 9.3103601875 | 2.386155382 | ns |
| UMOD        | 0.050455822 | 0.009973374 | 4.343527862 | 1.4110446630 | 0.000104047  | 2.269130787 | ns |
| LPL         | 0.044660657 | 0.009287675 | 4.334029945 | 1.4733822632 | 0.00010837   | 2.233438742 | ns |
| ACY1        | -0.05826149 | -0.00095489 | -4.32089868 | 1.5637492309 | 0.000114727  | 2.17706676  | ns |
| LCP1        | -0.04158404 | 0.058434104 | -4.31829121 | 1.5821992672 | 0.00011579   | 2.160721896 | ns |
| SERPINA6    | 0.014898954 | 0.020901187 | 4.314153434 | 1.6120785105 | 0.000117682  | 2.142834737 | ns |
| TNFRSF10B   | -0.0355469  | -0.03318523 | -4.31273028 | 1.6226280494 | 0.000118046  | 2.142813799 | ns |
| PON2        | -0.03250052 | -0.03382266 | -4.31227362 | 1.6261174854 | 0.000118046  | 2.146035261 | ns |
| CD300LF     | -0.0555183  | -0.16256069 | -4.31181334 | 1.6292010706 | 0.000118046  | 2.131247791 | ns |
| IL18        | -0.04275476 | -0.0342467  | -4.30931433 | 1.6478566975 | 0.000119103  | 2.128400396 | ns |
| RNASE3      | -0.10233288 | 0.064748747 | -4.30732288 | 1.6627618886 | 0.000119883  | 2.120991489 | ns |
| TAFI5       | -0.03091226 | -0.0233528  | -4.30134833 | 1.7081474595 | 0.000122852  | 2.093705156 | ns |
| CST1        | 0.087833171 | 0.048081719 | 4.293181976 | 1.7735889325 | 0.000127245  | 2.112468239 | ns |
| ST6GAL1     | -0.02671291 | -0.02674019 | -4.28892606 | 1.8062516424 | 0.000129271  | 2.034475305 | ns |
| AMY1A_AMY1B | 0.043285145 | 0.02286981  | 4.281249337 | 1.8704129654 | 0.000133536  | 2.029978485 | ns |
| SIRPB1      | -0.04102411 | -0.03952379 | -4.27980172 | 1.8819769120 | 0.000133965  | 2.002144185 | ns |
| CD27        | -0.03487177 | -0.03557877 | -4.27936045 | 1.8856073203 | 0.000133965  | 1.996246504 | ns |
| AMOT        | -0.0349296  | 0.015524282 | -4.27336397 | 1.9372224809 | 0.000137298  | 1.980265671 | ns |
| SNRPB2      | -0.03780379 | 0.03765377  | -4.25777942 | 2.0768303288 | 0.000146836  | 1.903151288 | ns |
| ENG         | 0.015551504 | 0.000188558 | 4.244182864 | 2.2066641936 | 0.000155639  | 1.845070876 | ns |
| CD38        | -0.02753705 | -0.02282377 | -4.24025323 | 2.2457878579 | 0.00015784   | 1.834853663 | ns |
| IGF2R       | -0.02152423 | -0.01476592 | -4.23995845 | 2.2486747430 | 0.00015784   | 1.831183731 | ns |
| LRTM2       | 0.02308434  | 0.040097765 | 4.237511468 | 2.2731550151 | 0.000159175  | 1.816832394 | ns |
| GFRA3       | 0.025358595 | 0.018740388 | 4.233997578 | 2.3092050505 | 0.000161313  | 1.810475069 | ns |
| NOTCH3      | 0.03061288  | 0.005703887 | 4.218449511 | 2.4738484947 | 0.000172402  | 1.73703546  | ns |
| DNER        | 0.023779907 | 0.008813408 | 4.217482072 | 2.4846622732 | 0.000172743  | 1.739181987 | ns |
| CFHR2       | -0.0482625  | -0.12068006 | -4.21451243 | 2.5174848514 | 0.000174609  | 1.724858742 | ns |
| PINLYP      | -0.05716225 | -0.06601671 | -4.2074701  | 2.5973263334 | 0.00017972   | 1.703091804 | ns |
| KLB         | 0.067455112 | 0.004789808 | 4.203863517 | 2.6391095795 | 0.00018218   | 1.688507904 | ns |
| CCN3        | -0.02835158 | -0.02570954 | -4.19631046 | 2.7281136480 | 0.00018788   | 1.645726078 | ns |
| MCAM        | 0.029792524 | 0.016806363 | 4.184584946 | 2.8727708815 | 0.000197376  | 1.6004307   | ns |
| S100P       | -0.04821654 | 0.033779393 | -4.1782339  | 2.9543744557 | 0.000202506  | 1.581577758 | ns |
| SCARF2      | 0.024805489 | -0.01020922 | 4.172110557 | 3.0343459599 | 0.000207501  | 1.543837233 | ns |
| USP28       | -0.03123993 | 0.036867591 | -4.16678778 | 3.1059673758 | 0.000211902  | 1.52286332  | ns |
| OMD         | 0.039421805 | -0.00650596 | 4.16295366  | 3.1586383796 | 0.000214994  | 1.50927431  | ns |
| TNFRSF9     | -0.03452276 | -0.0101551  | -4.15319514 | 3.2964702320 | 0.000223853  | 1.472866637 | ns |
| RRM2        | -0.04533343 | 0.037135017 | -4.15222966 | 3.3106682035 | 0.000224296  | 1.474712729 | ns |
| CD274       | -0.02950073 | -0.00287671 | -4.14785572 | 3.3741904474 | 0.00022807   | 1.450880078 | ns |
| SMOC2       | -0.03349809 | -0.02954394 | -4.14596248 | 3.4019916908 | 0.000229418  | 1.43923736  | ns |
| PIK3IP1     | -0.02180211 | -0.01434001 | -4.14163954 | 3.4667457402 | 0.000233246  | 1.42238744  | ns |
| IL1B        | -0.04982697 | 0.051392367 | -4.13641505 | 3.5469366463 | 0.000238093  | 1.411761907 | ns |
| RBKS        | -0.04568098 | 0.009818999 | -4.13332213 | 3.5949863172 | 0.000240436  | 1.398552936 | ns |
| BAG3        | -0.03625393 | -0.04105563 | -4.13309122 | 3.5983008968 | 0.000240436  | 1.391150019 | ns |
| BLNK        | -0.03151683 | 0.001154452 | -4.13064213 | 3.6370748592 | 0.000242472  | 1.387173636 | ns |
| BAP18       | -0.05714324 | 0.013947613 | -4.12962248 | 3.6526337067 | 0.000242954  | 1.36989326  | ns |
| HEG1        | -0.02223067 | -0.03468438 | -4.12162776 | 3.7820750634 | 0.000250992  | 1.348452716 | ns |
| GC          | -0.02119045 | 0.026826384 | -4.11979836 | 3.8117394666 | 0.000252387  | 1.329650032 | ns |
| VSNL1       | -0.03053023 | 0.002937973 | -4.11863296 | 3.8310357870 | 0.000253091  | 1.324923031 | ns |
| LRRC25      | -0.03436645 | -0.0111443  | -4.11279718 | 3.9293715527 | 0.000259001  | 1.30673305  | ns |
| B2M         | -0.02424474 | -0.0022426  | -4.10291524 | 4.1006321263 | 0.000269681  | 1.260776044 | ns |
| PILRB       | -0.0503712  | -0.12970868 | -4.099889   | 4.1548201788 | 0.000272631  | 1.25388908  | ns |
| CEACAM19    | -0.03170309 | -0.03398322 | -4.09278933 | 4.2837862242 | 0.000280463  | 1.220606087 | ns |
| WDR46       | -0.03097599 | 0.006255983 | -4.08561534 | 4.4182024567 | 0.000288616  | 1.191194042 | ns |
| RAB6A       | 0.040711324 | 0.055474091 | 4.076618922 | 4.5925575349 | 0.000299336  | 1.157542168 | ns |
| CLSTN2      | 0.033841199 | 0.021206573 | 4.071083414 | 4.7026756037 | 0.000305831  | 1.130496253 | ns |
| ALDH1A1     | -0.04739833 | 0.032720692 | -4.0651071  | 4.8249387127 | 0.000313085  | 1.11079977  | ns |
| LYPD3       | 0.029142355 | 0.004749544 | 4.06380094  | 4.8520406204 | 0.000314145  | 1.106618593 | ns |
| GHRL        | 0.070802388 | 0.053246639 | 4.057210616 | 4.9908653487 | 0.000322419  | 1.081187393 | ns |
| SCARA5      | -0.02470871 | -0.04072241 | -4.0545795  | 5.0469908586 | 0.000324984  | 1.064135128 | ns |
| THBD        | -0.0235982  | -0.01595167 | -4.05432352 | 5.0528341140 | 0.000324984  | 1.069569625 | ns |
| APEX1       | -0.05281537 | -0.01695463 | -4.04555913 | 5.2451895830 | 0.000336614  | 1.029001122 | ns |
| ILBP        | -0.05085048 | -0.06112739 | -4.04305364 | 5.3017076020 | 0.000339495  | 1.022755303 | ns |
| CLEC7A      | -0.05076771 | -0.12431534 | -4.03394134 | 5.5111381181 | 0.000352134  | 0.981137639 | ns |
| TMSB10      | -0.06713251 | -0.04443116 | -4.03264417 | 5.5419055899 | 0.000353327  | 0.980384472 | ns |

|          |             |             |             |              |             |             |    |
|----------|-------------|-------------|-------------|--------------|-------------|-------------|----|
| ISM1     | -0.03387188 | -0.03915717 | -4.02999486 | 5.6047155064 | 0.000356553 | 0.970033016 | ns |
| ANG      | -0.02968961 | -0.02723474 | -4.02313707 | 5.7705408606 | 0.000366304 | 0.94658204  | ns |
| SEPTIN8  | -0.02602056 | -0.00304184 | -4.01303861 | 6.0224127132 | 0.000381463 | 0.899361422 | ns |
| CIT      | -0.03793802 | 0.040308686 | -4.01204619 | 6.0484565414 | 0.000382283 | 0.906821417 | ns |
| AFM      | -0.01626118 | -0.01221922 | -4.00814053 | 6.1485101510 | 0.000387242 | 0.879385523 | ns |
| NADK     | -0.047358   | 0.003413089 | -4.00796448 | 6.1534381396 | 0.000387242 | 0.884149673 | ns |
| THOP1    | -0.02706646 | -0.00935662 | -4.00675513 | 6.1851327935 | 0.0003884   | 0.88135648  | ns |
| FABP5    | -0.0603297  | -0.02514401 | -4.00589    | 6.2073711725 | 0.00038896  | 0.871083662 | ns |
| CST5     | 0.047538521 | 0.032074523 | 4.001362931 | 6.3279531403 | 0.000395666 | 0.863906421 | ns |
| DNMBP    | -0.05434035 | 0.06235885  | -3.99157092 | 6.5943880495 | 0.000411445 | 0.819836863 | ns |
| PEAR1    | 0.019372439 | -0.00098816 | 3.988613574 | 6.6765565005 | 0.000415683 | 0.80119973  | ns |
| CTSB     | 0.046861609 | 0.074758993 | 3.984113067 | 6.8045854835 | 0.000422753 | 0.789078005 | ns |
| ENAH     | -0.04033848 | -0.00498068 | -3.97992869 | 6.9258108084 | 0.000429371 | 0.779318773 | ns |
| GBP1     | -0.05231513 | -0.01883414 | -3.97282701 | 7.1346589478 | 0.000441381 | 0.740344585 | ns |
| B4GALT1  | -0.02244247 | -0.01137044 | -3.97112846 | 7.1857845590 | 0.000443604 | 0.735180296 | ns |
| INPP5D   | -0.04682001 | 0.010741509 | -3.96418741 | 7.3986057265 | 0.000455779 | 0.717696453 | ns |
| FGFR2    | -0.01749726 | -0.02253775 | -3.95924851 | 7.5523098434 | 0.000464268 | 0.68788737  | ns |
| TIMP1    | -0.02289808 | -0.01831708 | -3.94013858 | 8.1801838314 | 0.00050181  | 0.624055185 | ns |
| TIGIT    | -0.02834348 | 0.007857633 | -3.93584066 | 8.3273488763 | 0.000509766 | 0.601050547 | ns |
| GRN      | -0.02017272 | -0.01926381 | -3.93511853 | 8.3523849746 | 0.000510229 | 0.597797874 | ns |
| DKK3     | 0.024811677 | 0.007080971 | 3.928185497 | 8.5959880388 | 0.000524014 | 0.56383532  | ns |
| SRPX     | 0.027355575 | -0.02342491 | 3.920332223 | 8.8807642768 | 0.000540246 | 0.533778061 | ns |
| GZMH     | -0.0611199  | -0.03104039 | -3.90897905 | 9.3092715920 | 0.000565137 | 0.501451443 | ns |
| GAPDH    | -0.02700474 | -0.08122497 | -3.90528337 | 9.4533119163 | 0.00057269  | 0.49722523  | ns |
| SIGLEC6  | -0.02705223 | -0.02438559 | -3.8946129  | 9.8767812304 | 0.000597106 | 0.432620298 | ns |
| IL32     | 0.034394042 | 0.009635475 | 3.893437374 | 9.9252147334 | 0.000598794 | 0.433220581 | ns |
| CELSR2   | -0.02175769 | -0.00448069 | -3.88775694 | 0.000101606  | 0.000611734 | 0.419273298 | ns |
| CCL23    | -0.0342494  | -0.02345672 | -3.88006601 | 0.000104862  | 0.000630038 | 0.380459398 | ns |
| FMNL1    | -0.0533914  | 0.016024313 | -3.87644216 | 0.000106444  | 0.00063823  | 0.376172147 | ns |
| ERP44    | -0.02178221 | -0.00243641 | -3.87539373 | 0.000106897  | 0.000639632 | 0.366489839 | ns |
| CCL19    | -0.09964738 | 0.236038158 | -3.86743138 | 0.000110437  | 0.000659429 | 0.328522385 | ns |
| CLUL1    | 0.038010928 | 0.035076086 | 3.866958147 | 0.000110658  | 0.000659429 | 0.333778241 | ns |
| FABP2    | 0.065154601 | 0.057176035 | 3.855859953 | 0.000115795  | 0.000688215 | 0.290729729 | ns |
| RASSF2   | -0.04849528 | 0.032255231 | -3.85553045 | 0.00011596   | 0.000688215 | 0.296173639 | ns |
| LEPR     | 0.026569309 | 0.027827652 | 3.851472756 | 0.000117888  | 0.00069824  | 0.273953475 | ns |
| TPR      | -0.03827535 | 0.035559665 | -3.8469128  | 0.000120109  | 0.000709959 | 0.264105647 | ns |
| CILP     | -0.04130552 | -0.08372801 | -3.84415751 | 0.000121451  | 0.000716438 | 0.240672181 | ns |
| TCOF1    | -0.02341262 | -0.00607701 | -3.84263044 | 0.000122208  | 0.000719453 | 0.23448365  | ns |
| ANXA1    | -0.03334116 | -0.02239906 | -3.84129573 | 0.000122889  | 0.000722001 | 0.243821052 | ns |
| GPKOW    | -0.02372651 | -0.00350804 | -3.83653406 | 0.000125292  | 0.000734642 | 0.223473202 | ns |
| PSPN     | -0.08138719 | -0.13095437 | -3.83148034 | 0.000127882  | 0.000748328 | 0.195755145 | ns |
| C7       | 0.023557808 | -0.02684234 | 3.830963589 | 0.000128159  | 0.000748447 | 0.201328663 | ns |
| PTPRZ1   | 0.025274125 | 0.020720232 | 3.830019508 | 0.000128638  | 0.000749748 | 0.186472468 | ns |
| GM2A     | -0.02832316 | -0.00674073 | -3.82909985 | 0.000129132  | 0.000751129 | 0.19453025  | ns |
| HAO1     | -0.10661952 | 0.020620964 | -3.82836919 | 0.000129502  | 0.00075178  | 0.1787661   | ns |
| TNFRSF6B | -0.04532602 | -0.0338869  | -3.82408994 | 0.000131778  | 0.000763474 | 0.170430344 | ns |
| PREB     | -0.02410844 | 0.001283572 | -3.81392938 | 0.000137319  | 0.000794001 | 0.137511402 | ns |
| ST3GAL1  | 0.035882362 | 0.060155425 | 3.809364149 | 0.000139869  | 0.000807152 | 0.114163686 | ns |
| PHLDB1   | -0.04102904 | -0.00647467 | -3.805462   | 0.000142085  | 0.000818321 | 0.094643677 | ns |
| LTBR     | -0.02134446 | -0.00391684 | -3.80223635 | 0.000143955  | 0.000827457 | 0.089501631 | ns |
| ENO3     | -0.04586888 | 0.053892122 | -3.8004682  | 0.000144991  | 0.000831775 | 0.087076822 | ns |
| DTNB     | -0.03299719 | -0.00528024 | -3.79289845 | 0.000149468  | 0.000855708 | 0.048240797 | ns |
| NMNAT1   | -0.06117048 | 0.037024758 | -3.79244001 | 0.000149749  | 0.000855708 | 0.050828583 | ns |
| LAMP2    | -0.01569596 | -0.01160369 | -3.79188537 | 0.000150094  | 0.000856002 | 0.055150157 | ns |
| SCRG1    | -0.01938237 | -0.02391007 | -3.78000436 | 0.000157414  | 0.000896001 | -0.00238938 | ns |
| ERN1     | -0.02838486 | -0.00836406 | -3.77331382 | 0.000161695  | 0.00091858  | -0.02655952 | ns |
| GCHFR    | -0.03924298 | 0.002623943 | -3.76612306 | 0.000166445  | 0.000943727 | -0.03206081 | ns |
| VEGFA    | -0.0472149  | 0.029447754 | -3.75346805 | 0.000175043  | 0.000990552 | -0.10075711 | ns |
| APOL1    | -0.04535483 | 0.088976768 | -3.751742   | 0.000176251  | 0.00099546  | -0.10696171 | ns |
| APOD     | 0.032737185 | 0.047112269 | 3.750472335 | 0.000177175  | 0.000998745 | -0.09145493 | ns |
| CPXM2    | -0.01822866 | -0.0228814  | -3.74295204 | 0.000182528  | 0.001026942 | -0.14070463 | ns |
| MAMDC2   | -0.02472086 | -0.00412573 | -3.74003851 | 0.000184655  | 0.00103691  | -0.15152305 | ns |
| NRP1     | 0.021887416 | -0.00772109 | 3.739060684 | 0.000185379  | 0.001038974 | -0.15219338 | ns |
| ARSB     | -0.04485404 | -0.00677018 | -3.73616408 | 0.000187528  | 0.001049007 | -0.1598804  | ns |
| CPQ      | -0.02621204 | -0.01981516 | -3.72134489 | 0.000198867  | 0.001110308 | -0.21963217 | ns |
| SEZ6L    | 0.021863882 | 0.011829324 | 3.707289287 | 0.000210222  | 0.001171469 | -0.27055365 | ns |



|              |             |             |             |             |             |             |    |
|--------------|-------------|-------------|-------------|-------------|-------------|-------------|----|
| DNPEP        | -0.04182836 | 0.009947578 | -3.70519547 | 0.000211962 | 0.001178913 | -0.28002242 | ns |
| CPE          | 0.030965454 | -0.03581652 | 3.704343468 | 0.000212679 | 0.001180651 | -0.28162616 | ns |
| CR1          | -0.02663114 | -0.00605057 | -3.70092825 | 0.00021556  | 0.001194376 | -0.29274257 | ns |
| ITGB7        | 0.036393128 | 0.023779023 | 3.700425891 | 0.000215982 | 0.001194444 | -0.29922353 | ns |
| EFCAB14      | -0.01917985 | -0.00638845 | -3.69571602 | 0.000220025 | 0.001214504 | -0.31384287 | ns |
| TNFRSF10C    | -0.0393775  | -0.09670437 | -3.69447746 | 0.000221105 | 0.001216833 | -0.31554896 | ns |
| HBEGF        | -0.05867727 | -0.02610994 | -3.69426813 | 0.00022128  | 0.001216833 | -0.32055487 | ns |
| PTPRF        | -0.02249297 | -0.01171792 | -3.69079729 | 0.000224318 | 0.001231217 | -0.33362559 | ns |
| LGALS7_LGALS | -0.03240271 | -0.00016966 | -3.68970424 | 0.000225292 | 0.001234246 | -0.33211346 | ns |
| IGSF3        | -0.02725222 | 0.002100542 | -3.68783176 | 0.000226956 | 0.001241032 | -0.33791635 | ns |
| PENK         | -0.02123555 | -0.00879142 | -3.67431682 | 0.000239309 | 0.001306135 | -0.38146695 | ns |
| FBP1         | -0.05880151 | -0.01463605 | -3.66870368 | 0.00024461  | 0.001332579 | -0.40799972 | ns |
| SORBS1       | -0.02917672 | 0.031570506 | -3.66619956 | 0.000247003 | 0.001343108 | -0.42360179 | ns |
| LY96         | -0.02825555 | -0.01404267 | -3.66442175 | 0.000248737 | 0.001350024 | -0.42281615 | ns |
| TCN1         | -0.02468735 | -0.00375252 | -3.65853577 | 0.000254521 | 0.00137885  | -0.44042064 | ns |
| FCRL1        | -0.03551156 | -0.0024533  | -3.65217659 | 0.000260894 | 0.001410761 | -0.46803475 | ns |
| SGSH         | -0.04106598 | -0.01126797 | -3.64712882 | 0.00026607  | 0.00143609  | -0.48508049 | ns |
| SUOX         | -0.04574175 | 0.065689172 | -3.64518705 | 0.00026807  | 0.001444214 | -0.49983974 | ns |
| TNC          | -0.03718386 | 0.00349746  | -3.64184326 | 0.000271583 | 0.001460449 | -0.50701699 | ns |
| HEPACAM2     | 0.030490242 | 0.026025487 | 3.635155467 | 0.000278712 | 0.001496028 | -0.53514383 | ns |
| HDFGL2       | -0.04707256 | 0.024071242 | -3.63063449 | 0.000283636 | 0.001519665 | -0.55144454 | ns |
| BECN1        | -0.04511568 | 0.047563299 | -3.62459047 | 0.000290372 | 0.001552906 | -0.56080191 | ns |
| PAXX         | -0.03303243 | 0.01019013  | -3.61621494 | 0.000299913 | 0.001600999 | -0.5916286  | ns |
| SPINK6       | -0.04299019 | -0.11993858 | -3.61548417 | 0.000300736 | 0.001602463 | -0.60760419 | ns |
| CCL5         | -0.08057883 | -0.11593381 | -3.61250735 | 0.000304218 | 0.001618065 | -0.61261643 | ns |
| GALNT3       | -0.03302852 | 0.001683694 | -3.60723862 | 0.000310471 | 0.001648321 | -0.62348072 | ns |
| TIMD4        | -0.03402189 | -0.02280482 | -3.60475037 | 0.000313442 | 0.001661074 | -0.64039643 | ns |
| CWC15        | -0.04561571 | 0.103608748 | -3.60305297 | 0.000315493 | 0.001668914 | -0.6468097  | ns |
| PSMD9        | -0.0447079  | 0.050005513 | -3.59985801 | 0.000319398 | 0.001686511 | -0.65603532 | ns |
| CNTN2        | 0.034838464 | 0.041309625 | 3.598080046 | 0.000321572 | 0.001694928 | -0.66990741 | ns |
| FGFBP3       | -0.02629629 | -0.01857842 | -3.59646027 | 0.00032358  | 0.001699562 | -0.67400714 | ns |
| STC2         | -0.01991534 | -0.00342332 | -3.5964386  | 0.000323615 | 0.001699562 | -0.67078214 | ns |
| MYBPC2       | -0.05933512 | 0.18236127  | -3.59522882 | 0.000325141 | 0.00170423  | -0.66597673 | ns |
| SEL1L        | -0.02264805 | 0.00306191  | -3.59480417 | 0.000325671 | 0.00170423  | -0.66749156 | ns |
| PCDH9        | -0.0237775  | -0.00992646 | -3.5930641  | 0.000327827 | 0.001712442 | -0.68512481 | ns |
| ICAM4        | 0.041659817 | -0.0441496  | 3.591309589 | 0.000330048 | 0.001720966 | -0.68882132 | ns |
| IL7R         | 0.041009691 | 0.016943953 | 3.584570771 | 0.000338679 | 0.001762819 | -0.71307164 | ns |
| DTYMK        | -0.04991787 | -0.01380721 | -3.58396962 | 0.000339451 | 0.001763694 | -0.71874342 | ns |
| CTHRC1       | -0.02001579 | -0.02702126 | -3.58247098 | 0.000341403 | 0.001770689 | -0.72370347 | ns |
| PAGR1        | -0.03069028 | 0.030777056 | -3.57797021 | 0.000347358 | 0.001798381 | -0.72739936 | ns |
| DEFB4A_DEFB  | -0.11260147 | -0.14645893 | -3.57463976 | 0.0003518   | 0.001818152 | -0.74267696 | ns |
| EIF4EBP1     | -0.0506674  | 0.012086571 | -3.5735656  | 0.000353235 | 0.001820159 | -0.74988652 | ns |
| OLFM4        | -0.08890508 | -0.15120375 | -3.57345813 | 0.000353435 | 0.001820159 | -0.72719022 | ns |
| VNN1         | -0.05292093 | -0.10123829 | -3.57249783 | 0.000354666 | 0.001823283 | -0.75842072 | ns |
| PSMG3        | -0.0401953  | 0.0163393   | -3.56782199 | 0.000361058 | 0.001852882 | -0.77226144 | ns |
| GLRX         | -0.04452555 | 0.00327093  | -3.5570679  | 0.000376156 | 0.001926974 | -0.80621628 | ns |
| ICAM1        | -0.02175685 | -0.02943166 | -3.54454579 | 0.000394471 | 0.002017261 | -0.84952547 | ns |
| FCRL3        | -0.0412912  | -0.02485141 | -3.54135948 | 0.000399269 | 0.002036621 | -0.85714085 | ns |
| GIPC2        | -0.02058079 | -0.00497731 | -3.54108645 | 0.000399652 | 0.002036621 | -0.87014347 | ns |
| PBXIP1       | -0.0219069  | 0.009272955 | -3.53938107 | 0.000402244 | 0.002046257 | -0.87513343 | ns |
| PEBP1        | -0.04541587 | 0.00087832  | -3.52484095 | 0.000424969 | 0.002158106 | -0.92379271 | ns |
| SH2D1A       | -0.04231461 | 0.05250215  | -3.52102927 | 0.000431122 | 0.002185551 | -0.93686418 | ns |
| FBLN2        | -0.0207902  | -0.00874705 | -3.51438744 | 0.000442028 | 0.002236952 | -0.96348496 | ns |
| BCL2         | -0.03735681 | 0.027505554 | -3.50710921 | 0.000454288 | 0.002292169 | -0.98798387 | ns |
| SCPEP1       | -0.03531485 | -0.00077027 | -3.5070016  | 0.000454509 | 0.002292169 | -0.97529124 | ns |
| CDCP1        | -0.03668293 | -0.07187559 | -3.50408207 | 0.000459496 | 0.002313325 | -0.99314373 | ns |
| LYPD8        | 0.037425435 | -0.00238495 | 3.501673287 | 0.000463687 | 0.002330404 | -0.99543109 | ns |
| CKAP4        | -0.01872599 | -0.00595406 | -3.50113821 | 0.000464583 | 0.002330897 | -1.0083134  | ns |
| ADGRF5       | -0.01976426 | -0.02799286 | -3.50058298 | 0.000465547 | 0.002331729 | -1.01191377 | ns |
| PSIP1        | -0.0477577  | 0.035757826 | -3.49913568 | 0.000468092 | 0.00234046  | -1.01313427 | ns |
| FGF23        | -0.04092337 | 0.061514744 | -3.49528484 | 0.00047488  | 0.00237034  | -1.03123883 | ns |
| HPSE         | -0.0652656  | -0.08430357 | -3.48188942 | 0.000499282 | 0.00248789  | -1.07006521 | ns |
| SRP14        | -0.04679556 | -0.01340821 | -3.46861295 | 0.000524592 | 0.002609555 | -1.11637397 | ns |
| MB           | -0.038116   | 0.020739999 | -3.45653621 | 0.000548631 | 0.002721336 | -1.164533   | ns |
| F11R         | -0.04247144 | 0.017438556 | -3.45639753 | 0.000548927 | 0.002721336 | -1.16090831 | ns |
| TGFB1        | -0.0282705  | -0.01279642 | -3.4486094  | 0.000564978 | 0.002796162 | -1.1915984  | ns |

|             |             |             |             |             |             |             |    |
|-------------|-------------|-------------|-------------|-------------|-------------|-------------|----|
| MRC1        | -0.01965351 | -0.02580756 | -3.44031634 | 0.000582567 | 0.002878335 | -1.21843796 | ns |
| NOS1        | -0.03859198 | -0.01122511 | -3.43343266 | 0.000597593 | 0.002947588 | -1.2304674  | ns |
| NCAN        | 0.02871307  | 0.031964853 | 3.432663336 | 0.000599244 | 0.002950748 | -1.24647573 | ns |
| DUT         | -0.07011851 | -0.03891855 | -3.42486608 | 0.0006167   | 0.003031587 | -1.27091088 | ns |
| TNR         | 0.031343718 | 0.04344359  | 3.415653169 | 0.000637949 | 0.003130773 | -1.29678704 | ns |
| CA9         | 0.031946855 | 0.034974485 | 3.413078866 | 0.000643974 | 0.00315504  | -1.31362086 | ns |
| SERPINE1    | -0.0501797  | -0.09002708 | -3.4092047  | 0.000653184 | 0.003194801 | -1.32581073 | ns |
| AHSG        | -0.01839753 | -0.01146139 | -3.40674703 | 0.000659092 | 0.003218309 | -1.33250868 | ns |
| GAST        | -0.07980796 | 0.237719385 | -3.40142723 | 0.000672042 | 0.003276066 | -1.35132642 | ns |
| FGF5        | 0.024243836 | -0.00604983 | 3.398933572 | 0.000678239 | 0.003300765 | -1.34760101 | ns |
| CA2         | -0.05254953 | 0.022368739 | -3.39073786 | 0.000698811 | 0.003395219 | -1.38202985 | ns |
| TOMM20      | -0.0521181  | 0.041646656 | -3.38784262 | 0.0007062   | 0.003425424 | -1.39732981 | ns |
| EXTL1       | 0.032963871 | 0.074238247 | 3.3858834   | 0.000711311 | 0.003444492 | -1.39025499 | ns |
| C9          | -0.03486955 | -0.06124499 | -3.383594   | 0.000717211 | 0.003467311 | -1.41053342 | ns |
| PSG1        | 0.083097762 | -0.18310122 | 3.38104568  | 0.000723915 | 0.003493938 | -1.41351107 | ns |
| PRTG        | 0.017716401 | 0.009911725 | 3.378663815 | 0.000730182 | 0.003516869 | -1.4296266  | ns |
| HIP1R       | -0.02886333 | 0.001337291 | -3.37832944 | 0.000731075 | 0.003516869 | -1.42809252 | ns |
| IL19        | -0.0492737  | -0.00312237 | -3.37552341 | 0.000738628 | 0.003547358 | -1.42337971 | ns |
| KIRREL2     | 0.02869673  | 0.000188261 | 3.372758321 | 0.000746065 | 0.003572701 | -1.43537478 | ns |
| HSPA2       | -0.02283043 | 0.008452284 | -3.37263538 | 0.000746352 | 0.003572701 | -1.44742512 | ns |
| PDZK1       | -0.02959377 | 0.020532367 | -3.36511551 | 0.00076703  | 0.003665675 | -1.45950408 | ns |
| CNDP1       | -0.03278033 | -0.0301518  | -3.35910879 | 0.000783845 | 0.003739916 | -1.48927252 | ns |
| AK1         | -0.04726566 | 0.007444219 | -3.35453732 | 0.000796909 | 0.003792788 | -1.50289395 | ns |
| F11         | -0.02059278 | 0.004171939 | -3.35432632 | 0.000797525 | 0.003792788 | -1.50146136 | ns |
| ITGBL1      | -0.02276738 | 0.002287456 | -3.35346519 | 0.000799978 | 0.00379827  | -1.51197266 | ns |
| NFKBIE      | -0.03604113 | 0.023023827 | -3.35251864 | 0.000802773 | 0.003805352 | -1.50269568 | ns |
| TDP1        | -0.04844213 | 0.089321489 | -3.35181832 | 0.000804752 | 0.003808553 | -1.51689808 | ns |
| PLXDC2      | 0.017650138 | 0.012825755 | 3.344645769 | 0.000825831 | 0.003901986 | -1.54143446 | ns |
| SPON2       | -0.0236817  | -0.02850134 | -3.34342919 | 0.000829494 | 0.003912958 | -1.53730233 | ns |
| PKD2        | -0.04017666 | 0.05123548  | -3.34017755 | 0.000839286 | 0.003947679 | -1.54279397 | ns |
| ASGR2       | -0.01691049 | -0.00895729 | -3.34006808 | 0.000839558 | 0.003947679 | -1.55577569 | ns |
| VASN        | -0.01960709 | -0.01119955 | -3.33621905 | 0.000851328 | 0.003996588 | -1.55361086 | ns |
| SNX15       | -0.03697013 | 0.000995616 | -3.33190867 | 0.00086459  | 0.004052331 | -1.57177886 | ns |
| NPTXR       | 0.024630006 | 0.046595402 | 3.32982694  | 0.000871053 | 0.00407608  | -1.5848627  | ns |
| NUDT5       | -0.03721469 | 0.009041588 | -3.32552219 | 0.000884597 | 0.004132839 | -1.60138795 | ns |
| HDGF        | -0.06810899 | 0.043572348 | -3.32166445 | 0.000896893 | 0.00418359  | -1.61840576 | ns |
| KCTD5       | -0.0297955  | -0.00222491 | -3.31981852 | 0.000902881 | 0.004204804 | -1.61448419 | ns |
| AGXT        | -0.05505075 | 0.063705728 | -3.31311596 | 0.000924766 | 0.004299869 | -1.63995298 | ns |
| SERPINA7    | -0.01234353 | -0.01020756 | -3.31004605 | 0.000934936 | 0.004340242 | -1.65574657 | ns |
| GPRC5C      | -0.03630131 | 0.065085458 | -3.30864046 | 0.000939644 | 0.004355177 | -1.65962665 | ns |
| C8B         | -0.02022629 | -0.01490046 | -3.30719682 | 0.000944491 | 0.004370703 | -1.66510409 | ns |
| TP53I3      | -0.03551928 | -0.00374249 | -3.30616401 | 0.000948078 | 0.004380361 | -1.64541765 | ns |
| PIGR        | -0.0253518  | -0.01968801 | -3.30526495 | 0.000951072 | 0.004387252 | -1.66129048 | ns |
| ODAM        | 0.038206126 | 0.080863638 | 3.304536495 | 0.000953559 | 0.004391786 | -1.6607774  | ns |
| SIAE        | -0.03333579 | -0.00954337 | -3.29576754 | 0.00098375  | 0.0045237   | -1.69992043 | ns |
| EDA2R       | -0.02404703 | -0.05887849 | -3.29395794 | 0.000990084 | 0.004545669 | -1.7101513  | ns |
| LTBP2       | 0.021553595 | -0.01365268 | 3.292709187 | 0.00099449  | 0.004558729 | -1.71330049 | ns |
| TOP2B       | -0.05254841 | 0.014177289 | -3.29087183 | 0.001001074 | 0.004581717 | -1.70470663 | ns |
| PDCD5       | -0.04236062 | -0.00980959 | -3.28834872 | 0.001010013 | 0.004615395 | -1.72786598 | ns |
| COMP        | -0.02393603 | -0.03413648 | -3.28473955 | 0.001023089 | 0.004667845 | -1.72759559 | ns |
| ADAM22      | -0.02391192 | -0.00237658 | -3.28257511 | 0.001030946 | 0.004696354 | -1.73913897 | ns |
| BOLA2_BOLA2 | -0.03698232 | -0.02938422 | -3.27679398 | 0.001052302 | 0.004786172 | -1.75176444 | ns |
| FUOM        | -0.04235051 | -0.00858004 | -3.27598566 | 0.001055306 | 0.004791314 | -1.75514793 | ns |
| APOA1       | 0.01788097  | 0.031703827 | 3.275594391 | 0.001056714 | 0.004791314 | -1.76835381 | ns |
| IGDCC4      | 0.016999358 | 0.023081224 | 3.274637996 | 0.001060297 | 0.004800105 | -1.77128196 | ns |
| IL13RA1     | -0.01579294 | -0.00252625 | -3.26659078 | 0.00109091  | 0.004927919 | -1.79083099 | ns |
| YTHDF3      | -0.05914468 | -0.01614724 | -3.26633916 | 0.001091905 | 0.004927919 | -1.78613892 | ns |
| FEN1        | -0.04546202 | 0.090077812 | -3.26260917 | 0.001106377 | 0.004985528 | -1.79782252 | ns |
| PRG2        | -0.03289322 | 0.009338928 | -3.2577119  | 0.001125563 | 0.005064165 | -1.82615864 | ns |
| MEPE        | -0.01748043 | -0.0170716  | -3.25180981 | 0.001149206 | 0.005155204 | -1.83981343 | ns |
| YOD1        | -0.04210623 | 0.005495756 | -3.25179152 | 0.001149328 | 0.005155204 | -1.83190191 | ns |
| NPTX1       | 0.027905571 | 0.025436673 | 3.249015732 | 0.001160539 | 0.005189616 | -1.8510189  | ns |
| CASC3       | -0.02724592 | 0.029887722 | -3.24902212 | 0.001160554 | 0.005189616 | -1.84194423 | ns |
| CDH6        | 0.025987023 | 0.002957018 | 3.248520668 | 0.001162569 | 0.005190673 | -1.85029857 | ns |
| AXL         | 0.01873051  | 0.001915937 | 3.246586968 | 0.001170483 | 0.00521803  | -1.85815047 | ns |
| CDH2        | -0.02464843 | -0.04225964 | -3.24491328 | 0.001177386 | 0.005240805 | -1.86192359 | ns |

|           |             |             |             |             |             |             |    |
|-----------|-------------|-------------|-------------|-------------|-------------|-------------|----|
| SDC1      | -0.02608821 | -0.00568996 | -3.24392765 | 0.001181465 | 0.005250956 | -1.86509759 | ns |
| IFNL2     | -0.04043507 | 0.110522125 | -3.2392924  | 0.001200862 | 0.005329052 | -1.87389056 | ns |
| COL9A2    | -0.03009746 | 0.034086214 | -3.23686124 | 0.001211099 | 0.005359341 | -1.8866355  | ns |
| SNCA      | -0.07502249 | -0.03125633 | -3.23680519 | 0.001211358 | 0.005359341 | -1.8817726  | ns |
| FAS       | -0.02273868 | -0.00716048 | -3.23549208 | 0.001216888 | 0.005375665 | -1.89654845 | ns |
| LILRA2    | -0.02553453 | -0.03608417 | -3.23189577 | 0.00123231  | 0.005435566 | -1.90608481 | ns |
| TPK1      | -0.01739984 | -0.00937659 | -3.23099436 | 0.00123618  | 0.005444413 | -1.91257909 | ns |
| SEZ6      | 0.020009954 | 0.016932741 | 3.228391219 | 0.001247542 | 0.005486179 | -1.90825754 | ns |
| CSF2RA    | -0.04313459 | -0.05182923 | -3.22715823 | 0.0012529   | 0.005501455 | -1.91816852 | ns |
| APOF      | 0.016210769 | -0.01808688 | 3.215724914 | 0.001303827 | 0.005716478 | -1.9603535  | ns |
| GIGYF2    | -0.05033353 | 0.043087227 | -3.21521378 | 0.001306142 | 0.005718041 | -1.96379621 | ns |
| RECK      | 0.013186528 | 0.005920219 | 3.21098879  | 0.001325564 | 0.005794383 | -1.96361717 | ns |
| ADAMTSL2  | -0.02017268 | -0.00973417 | -3.20918277 | 0.001333841 | 0.005817049 | -1.98192226 | ns |
| PTPRB     | -0.01875947 | -0.0190152  | -3.20898998 | 0.001334734 | 0.005817049 | -1.98291328 | ns |
| ACAA1     | -0.05641963 | 0.00510804  | -3.20605096 | 0.001348514 | 0.005868346 | -1.97936945 | ns |
| MSTN      | -0.03572319 | 0.014857572 | -3.20355204 | 0.001360259 | 0.00591065  | -1.98793733 | ns |
| GASK1A    | -0.0281386  | -0.01555889 | -3.19307622 | 0.001410558 | 0.006120103 | -2.01967808 | ns |
| AIFM1     | -0.07234578 | -0.00148481 | -3.18771175 | 0.001436924 | 0.006225251 | -2.04334311 | ns |
| HNRNPUL1  | -0.03211663 | 0.024157675 | -3.18414109 | 0.001454709 | 0.006285753 | -2.06249153 | ns |
| GLO1      | -0.04045695 | -0.01448294 | -3.18406166 | 0.001455195 | 0.006285753 | -2.04971761 | ns |
| ATRAID    | -0.01661102 | -0.00162156 | -3.18029759 | 0.001474142 | 0.00635819  | -2.07264931 | ns |
| TNFSF11   | -0.04244516 | 0.033923726 | -3.17092204 | 0.001522548 | 0.006542955 | -2.09958359 | ns |
| DPP4      | 0.019935645 | -0.0035965  | 3.170924302 | 0.001522608 | 0.006542955 | -2.08843208 | ns |
| ARTN      | -0.03156777 | 0.04621528  | -3.1707109  | 0.001523702 | 0.006542955 | -2.09160207 | ns |
| RBP2      | 0.052352827 | 0.011937797 | 3.163973273 | 0.001559357 | 0.006686229 | -2.11909581 | ns |
| XCL1      | -0.0379824  | 0.011526021 | -3.16076752 | 0.001576565 | 0.006750101 | -2.1368604  | ns |
| BOLA1     | -0.03454666 | 0.01293374  | -3.15145071 | 0.001627795 | 0.006959241 | -2.15246698 | ns |
| ARHGAP1   | 0.03156044  | -0.00398809 | 3.142380552 | 0.001679053 | 0.007167889 | -2.1799525  | ns |
| VEGFD     | 0.0245853   | 0.020503335 | 3.13723297  | 0.001708698 | 0.007283794 | -2.209333   | ns |
| MYH9      | -0.07151341 | -0.01766112 | -3.12720938 | 0.001768011 | 0.007525644 | -2.23972908 | ns |
| SIGLEC10  | -0.02222945 | -0.01629258 | -3.12415333 | 0.001786496 | 0.007593259 | -2.24570536 | ns |
| WARS      | -0.02303439 | -0.02033913 | -3.12280457 | 0.001794692 | 0.007617008 | -2.25014946 | ns |
| ASAH2     | -0.03664973 | -0.07316103 | -3.12111542 | 0.001805034 | 0.007649781 | -2.25226438 | ns |
| TPP1      | -0.02994965 | -0.01642557 | -3.11759036 | 0.001826765 | 0.007730658 | -2.25995768 | ns |
| NCAM1     | 0.020546866 | 0.017233854 | 3.114106304 | 0.001848424 | 0.007810997 | -2.27637248 | ns |
| ICOSLG    | 0.01277627  | 0.003342288 | 3.112946919 | 0.001855708 | 0.007830445 | -2.27805502 | ns |
| LPCAT2    | -0.02719368 | 0.042602369 | -3.10375753 | 0.001914283 | 0.008062197 | -2.30640786 | ns |
| MFGE8     | -0.02885214 | -0.00135325 | -3.10330859 | 0.001917172 | 0.008062197 | -2.31039557 | ns |
| MAP1LC3A  | 0.019464252 | -0.01068705 | 3.103050068 | 0.001918913 | 0.008062197 | -2.3026942  | ns |
| PDIA3     | -0.01605379 | -0.00153876 | -3.10199377 | 0.001925754 | 0.008079311 | -2.30583641 | ns |
| MDGA1     | 0.046842324 | -0.03926383 | 3.10058622  | 0.001934895 | 0.008106017 | -2.31565529 | ns |
| MPRIIP    | -0.02756862 | -0.02048133 | -3.09113046 | 0.001997513 | 0.008356359 | -2.35005392 | ns |
| CXCL14    | -0.04144545 | 0.046778147 | -3.08886646 | 0.002012863 | 0.008408527 | -2.34583758 | ns |
| CD46      | -0.01852331 | -0.00838459 | -3.08694959 | 0.002025865 | 0.008450751 | -2.3544015  | ns |
| FGF21     | -0.08047926 | -0.12870227 | -3.08537497 | 0.002036537 | 0.008483151 | -2.36982193 | ns |
| MEGF10    | 0.02640584  | 0.010438591 | 3.078497779 | 0.002084147 | 0.0086691   | -2.38431112 | ns |
| TNFRSF13B | -0.0220082  | -0.01794622 | -3.077057   | 0.002094233 | 0.008698663 | -2.39001085 | ns |
| PTPRC     | -0.01412377 | -0.00194468 | -3.07059414 | 0.002140034 | 0.008876277 | -2.41389488 | ns |
| WASL      | -0.03528833 | 0.092964813 | -3.06588168 | 0.002174142 | 0.009004956 | -2.41441491 | ns |
| CCER2     | -0.03670146 | 0.035620043 | -3.06356941 | 0.002190993 | 0.009054172 | -2.42264073 | ns |
| PLAU      | 0.018512292 | -0.0023092  | 3.06339094  | 0.002192226 | 0.009054172 | -2.43257267 | ns |
| HS6ST1    | -0.02161859 | 0.001433456 | -3.06024862 | 0.002215308 | 0.009136582 | -2.44725279 | ns |
| KIF1C     | -0.02194793 | 0.023050998 | -3.04935865 | 0.002297294 | 0.009461354 | -2.46488057 | ns |
| CLGN      | -0.0266069  | 0.023910683 | -3.04714859 | 0.002314221 | 0.00951764  | -2.47268842 | ns |
| SORCS2    | -0.02161634 | -0.0212106  | -3.04535455 | 0.002328082 | 0.009561182 | -2.47788961 | ns |
| NID1      | -0.0249098  | -0.02001742 | -3.04490587 | 0.00233149  | 0.009561729 | -2.48636279 | ns |
| MMP7      | -0.0290177  | -0.07096548 | -3.04370121 | 0.002340904 | 0.009586871 | -2.48270133 | ns |
| CCL25     | 0.032244852 | -0.04666595 | 3.034591891 | 0.002412597 | 0.009866644 | -2.52444387 | ns |
| FCRL5     | -0.0373347  | -0.05477698 | -3.02884918 | 0.002458947 | 0.010042132 | -2.53702066 | ns |
| CCL14     | -0.02567598 | -0.02449548 | -3.02380142 | 0.002500359 | 0.010196993 | -2.54773884 | ns |
| CC2D1A    | -0.04956046 | 0.043907301 | -3.01701769 | 0.002556953 | 0.010413254 | -2.56938946 | ns |
| BAG4      | -0.02972303 | 0.03790814  | -3.01613111 | 0.002564503 | 0.010429455 | -2.56457397 | ns |
| ITGAM     | 0.020148439 | 0.011571648 | 3.00771496  | 0.002636458 | 0.010707171 | -2.60034335 | ns |
| THPO      | -0.02460868 | -5.06E-05   | -3.00638702 | 0.002648079 | 0.010739432 | -2.59554628 | ns |
| SIGLEC7   | -0.01816057 | -0.03691398 | -3.0045563  | 0.002663989 | 0.010788971 | -2.60742488 | ns |
| OSCAR     | -0.02155681 | -0.0420941  | -3.00268535 | 0.002680396 | 0.010840385 | -2.61443323 | ns |

|          |             |             |             |             |             |             |    |
|----------|-------------|-------------|-------------|-------------|-------------|-------------|----|
| SCAMP3   | -0.05579063 | 0.02090481  | -3.00180217 | 0.002688196 | 0.010856893 | -2.61536283 | ns |
| CRTAC1   | 0.01929531  | -0.03935703 | 3.000753125 | 0.002697409 | 0.010879053 | -2.62530332 | ns |
| DTX3     | -0.01481672 | -0.02128341 | -2.99845682 | 0.002717867 | 0.010946445 | -2.62532561 | ns |
| TIMP3    | -0.08460939 | 0.089397347 | -2.99443225 | 0.002753925 | 0.011076394 | -2.64090639 | ns |
| PTX3     | 0.032027627 | -0.07781515 | 2.988096599 | 0.00281165  | 0.011293009 | -2.65846363 | ns |
| CCL17    | -0.0583063  | -0.08126845 | -2.98714159 | 0.002820458 | 0.011312827 | -2.65845465 | ns |
| QDPR     | -0.02790005 | -0.01044036 | -2.98633822 | 0.002827894 | 0.011327092 | -2.65890033 | ns |
| CA3      | -0.03973054 | 0.016364658 | -2.98524639 | 0.002837927 | 0.011351709 | -2.67048616 | ns |
| SLC16A1  | -0.03710496 | 0.072578494 | -2.97167921 | 0.002966437 | 0.011849516 | -2.69811632 | ns |
| ZBTB17   | -0.02447624 | 0.004713698 | -2.96962396 | 0.002986342 | 0.011912732 | -2.70457754 | ns |
| PLA2G10  | 0.03852643  | 0.023106515 | 2.958711354 | 0.003094021 | 0.012325432 | -2.74232083 | ns |
| DDAH1    | -0.02816433 | 0.0037605   | -2.95563815 | 0.003124988 | 0.012431832 | -2.75186382 | ns |
| RPE      | -0.04314238 | 0.079024553 | -2.94722378 | 0.00321126  | 0.012757659 | -2.77558269 | ns |
| CEBPB    | -0.02347037 | 0.014006497 | -2.93229993 | 0.003369678 | 0.013368833 | -2.81390175 | ns |
| SEMA4D   | -0.01866769 | -0.00860303 | -2.92775223 | 0.003419183 | 0.013546829 | -2.84046092 | ns |
| RCMA     | 0.019353656 | 0.024678316 | 2.924163835 | 0.003458827 | 0.013685331 | -2.85088477 | ns |
| BCAN     | 0.021817118 | 0.042684075 | 2.923309689 | 0.003468403 | 0.013704649 | -2.84567437 | ns |
| ENPP5    | 0.027667556 | -0.014431   | 2.921582302 | 0.003487636 | 0.013756352 | -2.85483014 | ns |
| MAPT     | -0.03183928 | -0.05906622 | -2.92130024 | 0.00349091  | 0.013756352 | -2.84545498 | ns |
| PRKRA    | -0.04277033 | 0.022198325 | -2.91349859 | 0.003579296 | 0.014085638 | -2.8678202  | ns |
| MIA      | -0.02251792 | 0.014763211 | -2.91257334 | 0.003589776 | 0.01410787  | -2.88150354 | ns |
| IL18BP   | -0.01821466 | -0.01793789 | -2.91179681 | 0.003598735 | 0.014124069 | -2.88145929 | ns |
| NCR1     | -0.02211513 | 0.008840206 | -2.90968912 | 0.003623081 | 0.014195643 | -2.88799369 | ns |
| GRPEL1   | -0.03729423 | 0.019964552 | -2.90937859 | 0.003626695 | 0.014195643 | -2.88652766 | ns |
| F13B     | -0.01489156 | -0.01699364 | -2.90850021 | 0.003636862 | 0.014216383 | -2.89170049 | ns |
| KDR      | -0.01600708 | -0.01898273 | -2.89773098 | 0.003764015 | 0.014693749 | -2.92431055 | ns |
| CFHR4    | -0.04212976 | -0.10948649 | -2.89345523 | 0.003815607 | 0.014875265 | -2.93758964 | ns |
| VAMP5    | -0.03326192 | 0.07240875  | -2.89255432 | 0.003826702 | 0.01488769  | -2.92880045 | ns |
| RSPO3    | -0.01634784 | -0.01457522 | -2.89235317 | 0.003828992 | 0.01488769  | -2.94335442 | ns |
| BNIP3L   | -0.02568181 | 0.024587305 | -2.88475241 | 0.003922781 | 0.015232076 | -2.94931089 | ns |
| PPL      | -0.01853901 | -0.00607081 | -2.88359585 | 0.003937207 | 0.015267789 | -2.95262184 | ns |
| NRCAM    | -0.01691349 | 0.002249471 | -2.88186791 | 0.00395875  | 0.01533097  | -2.96588039 | ns |
| KLKB1    | -0.01450279 | 0.002368563 | -2.88070041 | 0.003973494 | 0.015367686 | -2.9647996  | ns |
| CA1      | -0.03865558 | 0.002897596 | -2.87829488 | 0.004004001 | 0.015465189 | -2.96330513 | ns |
| DKK4     | -0.02802968 | 0.009476416 | -2.87383823 | 0.004060775 | 0.015663754 | -2.98662093 | ns |
| RPL14    | -0.02324771 | 0.018893004 | -2.87150672 | 0.004090892 | 0.015759111 | -2.98835411 | ns |
| CHAC2    | -0.03690768 | 0.03139876  | -2.87061134 | 0.004102504 | 0.015783018 | -2.99093341 | ns |
| KHK      | -0.03746072 | -0.05240327 | -2.86882133 | 0.004125765 | 0.015851624 | -2.99600457 | ns |
| MELTF    | 0.016530097 | 0.000390219 | 2.863975239 | 0.004189228 | 0.016074303 | -3.02293556 | ns |
| LILRA6   | -0.04209563 | -0.08383911 | -2.86301775 | 0.004201901 | 0.016101773 | -3.02565759 | ns |
| NRN1     | 0.020464385 | 0.02868848  | 2.856598901 | 0.004287752 | 0.016409222 | -3.04462285 | ns |
| CD2AP    | -0.03945365 | 0.014470425 | -2.8527185  | 0.004340509 | 0.016589379 | -3.04885111 | ns |
| CTSF     | 0.024580261 | -0.00066035 | 2.850717513 | 0.004367852 | 0.016672064 | -3.05846075 | ns |
| CEACAM16 | -0.04567879 | -0.02144254 | -2.84795549 | 0.00440591  | 0.016795374 | -3.06708473 | ns |
| TAX1BP1  | -0.03696325 | 0.078405696 | -2.8429409  | 0.004475778 | 0.017039469 | -3.08228914 | ns |
| MYOC     | 0.02817338  | -0.01576526 | 2.840922126 | 0.004504244 | 0.017125511 | -3.08455041 | ns |
| PGD      | -0.03087204 | -0.00138277 | -2.83337868 | 0.004611831 | 0.017511762 | -3.1094686  | ns |
| SLITRK2  | -0.02399575 | -0.01402865 | -2.82877433 | 0.004678654 | 0.017742428 | -3.12392141 | ns |
| PLA2G7   | -0.0189504  | -0.01671476 | -2.82626397 | 0.004715521 | 0.017859042 | -3.12578493 | ns |
| VGFB     | 0.016696671 | 0.015262499 | 2.819003395 | 0.004823399 | 0.018201303 | -3.15054601 | ns |
| NME3     | -0.01400308 | 0.003821683 | -2.81881824 | 0.004826247 | 0.018201303 | -3.14572675 | ns |
| GALNT2   | 0.015314364 | 0.01457175  | 2.818518064 | 0.004830694 | 0.018201303 | -3.15267416 | ns |
| TNFRSF19 | -0.01708722 | -0.0182122  | -2.81850934 | 0.004830825 | 0.018201303 | -3.15269858 | ns |
| NSFL1C   | -0.04085885 | -0.01148979 | -2.81771368 | 0.00484281  | 0.018203387 | -3.15430081 | ns |
| CDH3     | -0.02041183 | 0.008297827 | -2.81764495 | 0.004843847 | 0.018203387 | -3.15449309 | ns |
| DNPH1    | -0.03190289 | 0.001263057 | -2.8143843  | 0.004893279 | 0.018365519 | -3.15948525 | ns |
| F3       | 0.016247388 | 0.001808745 | 2.812983593 | 0.004914622 | 0.018421948 | -3.16485731 | ns |
| CLEC5A   | -0.01698998 | -0.01994965 | -2.81045577 | 0.004953446 | 0.018543669 | -3.1654369  | ns |
| TREH     | -0.04268683 | -0.05782232 | -2.81000372 | 0.004960308 | 0.01854558  | -3.1745683  | ns |
| AREG     | -0.0265223  | 0.02018985  | -2.80835481 | 0.004985842 | 0.018617211 | -3.17323571 | ns |
| GIMAP8   | -0.02886944 | 0.021448399 | -2.8071517  | 0.005004608 | 0.018663419 | -3.16769828 | ns |
| TSPAN1   | -0.03333987 | 0.154218891 | -2.79860767 | 0.005138866 | 0.019139654 | -3.19415969 | ns |
| HDDC2    | -0.02461377 | 0.034345231 | -2.7970638  | 0.005163306 | 0.019206181 | -3.20969289 | ns |
| CTRL     | 0.036879441 | -0.00451214 | 2.79658183  | 0.005170994 | 0.019210309 | -3.21207179 | ns |
| CD300LG  | 0.021771577 | 0.019753201 | 2.796104619 | 0.005178686 | 0.019214439 | -3.20995526 | ns |
| FOLR2    | -0.01737808 | -0.01235875 | -2.78664947 | 0.005332078 | 0.019758461 | -3.24072514 | ns |

|           |             |             |             |             |             |             |    |
|-----------|-------------|-------------|-------------|-------------|-------------|-------------|----|
| FGFR4     | -0.02935342 | 0.040690262 | -2.78220662 | 0.005405746 | 0.020006055 | -3.23970434 | ns |
| DYNLT1    | -0.04450145 | 0.141053321 | -2.780627   | 0.005432116 | 0.0200782   | -3.24354476 | ns |
| PSME1     | -0.02272911 | -0.00260616 | -2.77381565 | 0.005547032 | 0.020477032 | -3.26841103 | ns |
| DNAJB2    | -0.03092916 | 0.015920004 | -2.77333883 | 0.005555218 | 0.02048136  | -3.26415593 | ns |
| ARMCX2    | -0.03536308 | 0.119234436 | -2.76769042 | 0.005652391 | 0.020813343 | -3.27979971 | ns |
| NRTN      | -0.02951059 | -0.00696535 | -2.76622233 | 0.005677876 | 0.020880854 | -3.28338662 | ns |
| NFATC3    | -0.03555484 | 0.109977462 | -2.76358239 | 0.005723988 | 0.021023957 | -3.29063212 | ns |
| CD40      | -0.02948253 | 0.023642807 | -2.75917748 | 0.005801585 | 0.021282197 | -3.30952247 | ns |
| ECHS1     | -0.05310065 | -0.02536621 | -2.75762255 | 0.005829347 | 0.021357205 | -3.30652288 | ns |
| AFP       | 0.040367928 | 0.046349366 | 2.756972687 | 0.005840877 | 0.021372631 | -3.3129963  | ns |
| PAM       | -0.0164778  | -0.0376591  | -2.75470175 | 0.005881452 | 0.021494167 | -3.32548083 | ns |
| TNFRSF13C | -0.02486738 | -0.02108308 | -2.75204425 | 0.005929516 | 0.021642733 | -3.32221823 | ns |
| SCGB3A2   | 0.049410916 | 0.052983151 | 2.750302477 | 0.005960986 | 0.021730436 | -3.336003   | ns |
| KLf4      | -0.02286791 | 0.003301661 | -2.74652662 | 0.006030145 | 0.021955143 | -3.33772198 | ns |
| IGSF21    | 0.02187054  | 0.029836018 | 2.739932188 | 0.006152414 | 0.022372414 | -3.35479207 | ns |
| IL20RA    | -0.02682643 | 0.052029597 | -2.73788245 | 0.006190857 | 0.022484208 | -3.36080624 | ns |
| CHRD12    | -0.03196807 | 0.019447355 | -2.734303   | 0.006258438 | 0.022701414 | -3.37724393 | ns |
| EEF1D     | -0.05136413 | 0.01657469  | -2.73034663 | 0.00633393  | 0.022946744 | -3.39403577 | ns |
| IGLC2     | -0.0127979  | 0.004191152 | -2.72824416 | 0.006374436 | 0.023064874 | -3.39870574 | ns |
| CHI3L1    | -0.04289499 | 0.00532414  | -2.7278225  | 0.006382857 | 0.023066761 | -3.38263687 | ns |
| DNAJB8    | -0.03291537 | 0.109921576 | -2.72237191 | 0.006488971 | 0.023421253 | -3.40306078 | ns |
| IDO1      | -0.03475343 | 0.01788566  | -2.72081462 | 0.006519596 | 0.023475049 | -3.40660656 | ns |
| HLA-E     | -0.01599553 | -0.00444427 | -2.72050113 | 0.006525648 | 0.023475049 | -3.41672065 | ns |
| TOR1AIP1  | -0.02831928 | 0.021777381 | -2.72038886 | 0.006527993 | 0.023475049 | -3.40775638 | ns |
| NACC1     | -0.03098756 | 0.03640718  | -2.7167271  | 0.006600435 | 0.023706358 | -3.42990595 | ns |
| DAAM1     | -0.04535584 | 0.022401802 | -2.71500269 | 0.006635033 | 0.023801347 | -3.42306514 | ns |
| IL17RB    | 0.031755781 | 0.021288541 | 2.713600583 | 0.006663149 | 0.023872879 | -3.4299142  | ns |
| TGOLN2    | -0.0135347  | -0.01089464 | -2.7118915  | 0.006697435 | 0.023963829 | -3.44278832 | ns |
| CAT       | -0.03035055 | 0.057282782 | -2.71152545 | 0.006704948 | 0.023963829 | -3.43688362 | ns |
| ISLR2     | 0.02193157  | -0.00849424 | 2.707898697 | 0.006778741 | 0.02419795  | -3.4392481  | ns |
| HMBS      | -0.02558848 | -0.02120055 | -2.7019019  | 0.006901902 | 0.024607515 | -3.47226239 | ns |
| NEFL      | 0.023904269 | -0.03065688 | 2.699334663 | 0.006955603 | 0.024768733 | -3.46297711 | ns |
| TF        | -0.01178659 | -0.00701648 | -2.69808584 | 0.006981499 | 0.024830665 | -3.48077411 | ns |
| ADAMTS16  | -0.01830335 | 0.003784119 | -2.6959146  | 0.007027362 | 0.024963379 | -3.4742119  | ns |
| CLEC11A   | -0.02703912 | -0.03148448 | -2.69424958 | 0.007062413 | 0.025057408 | -3.4863579  | ns |
| LY9       | -0.01667255 | -0.01034892 | -2.69270619 | 0.007095252 | 0.02514337  | -3.48516097 | ns |
| CSDE1     | -0.06542914 | 0.236191659 | -2.69157012 | 0.007119525 | 0.025198804 | -3.48428189 | ns |
| CRISP3    | -0.01455482 | 0.008000267 | -2.68379945 | 0.00728689  | 0.025759949 | -3.51372043 | ns |
| VIT       | -0.01955979 | -0.04245974 | -2.68309809 | 0.007302106 | 0.025777407 | -3.52101143 | ns |
| HAGH      | -0.04292535 | 0.031452897 | -2.68276041 | 0.007309484 | 0.025777407 | -3.52210056 | ns |
| ADAMTS13  | 0.012987389 | 0.008123303 | 2.678995913 | 0.007392118 | 0.026037375 | -3.53249302 | ns |
| LRG1      | -0.01357363 | -0.00069428 | -2.67711727 | 0.007433685 | 0.02615224  | -3.53672717 | ns |
| ESYT2     | -0.04463462 | 0.031658512 | -2.6736973  | 0.007509875 | 0.02638849  | -3.54577422 | ns |
| FARSA     | -0.03758787 | 0.118898617 | -2.67159186 | 0.007557331 | 0.026501186 | -3.5386039  | ns |
| BCL2L15   | -0.03057455 | 0.052175926 | -2.67139802 | 0.007561738 | 0.026501186 | -3.53764756 | ns |
| TFF3      | -0.02550271 | 0.034613405 | -2.67094696 | 0.007571777 | 0.026501186 | -3.5460653  | ns |
| CTSE      | 0.027779365 | 0.016807315 | 2.670662861 | 0.00757825  | 0.026501186 | -3.54159059 | ns |
| SSB       | -0.03256004 | 0.078825803 | -2.66921704 | 0.007610977 | 0.026583797 | -3.54489928 | ns |
| DLL1      | -0.01580962 | -0.01921755 | -2.66880584 | 0.007620102 | 0.026583868 | -3.55688427 | ns |
| BTN2A1    | -0.01380982 | -0.01175012 | -2.66447711 | 0.007718837 | 0.026896186 | -3.5677544  | ns |
| NIT2      | -0.03998476 | -0.04011081 | -2.66152966 | 0.007786705 | 0.027100331 | -3.57685826 | ns |
| STX8      | -0.02809765 | 0.031013476 | -2.65904253 | 0.007844441 | 0.027268772 | -3.58084113 | ns |
| LETM1     | -0.02810185 | 0.027133092 | -2.65550518 | 0.007927058 | 0.027511097 | -3.5948874  | ns |
| ULBP2     | -0.02003162 | -0.02186822 | -2.65525828 | 0.007932995 | 0.027511097 | -3.58790744 | ns |
| PNLIP     | 0.031993048 | 0.042523442 | 2.65325824  | 0.007980025 | 0.027641367 | -3.59895235 | ns |
| APOA4     | 0.018492171 | 0.017433054 | 2.651260946 | 0.008027343 | 0.027772326 | -3.60512236 | ns |
| DLK1      | -0.03123534 | -0.01779627 | -2.65085402 | 0.008037008 | 0.027772854 | -3.60695539 | ns |
| CCL26     | -0.05117225 | 0.034622279 | -2.64772198 | 0.008111898 | 0.027975984 | -3.61066318 | ns |
| CD36      | -0.02392902 | 0.029869116 | -2.64760179 | 0.008114951 | 0.027975984 | -3.60046893 | ns |
| TP53BP1   | -0.04751937 | 0.251193469 | -2.64281003 | 0.008230637 | 0.028319058 | -3.61305112 | ns |
| WFIKN1    | -0.02301358 | 0.013343391 | -2.64267316 | 0.008233863 | 0.028319058 | -3.61934253 | ns |
| ACYP1     | -0.03554301 | -0.00051881 | -2.64134828 | 0.008266198 | 0.028396823 | -3.6167782  | ns |
| TIE1      | 0.023722835 | -0.07811984 | 2.636139631 | 0.00839387  | 0.028801529 | -3.64557632 | ns |
| DNAJA4    | -0.03863551 | 0.047081841 | -2.63499494 | 0.008422223 | 0.028864897 | -3.64777183 | ns |
| PAFAH1B3  | -0.0632796  | 0.44885687  | -2.63268287 | 0.008479729 | 0.029027911 | -3.65480294 | ns |
| HSD17B14  | -0.03234791 | -0.01463328 | -2.62615463 | 0.008644046 | 0.029555754 | -3.67086147 | ns |

|            |             |             |             |             |             |             |    |
|------------|-------------|-------------|-------------|-------------|-------------|-------------|----|
| C1QTNF9    | 0.025794752 | -0.03522758 | 2.621180926 | 0.008771341 | 0.029955924 | -3.67083828 | ns |
| BMPER      | -0.01158615 | -0.01125567 | -2.61820663 | 0.008848122 | 0.030128323 | -3.6792943  | ns |
| BLVRB      | -0.03848599 | 0.066930919 | -2.61803284 | 0.0088525   | 0.030128323 | -3.68853928 | ns |
| IL22       | -0.03444613 | 0.027189357 | -2.6180205  | 0.008852774 | 0.030128323 | -3.69131346 | ns |
| NCLN       | -0.03069107 | 0.102801357 | -2.61642084 | 0.00889454  | 0.030235224 | -3.68359618 | ns |
| NENF       | -0.05971424 | 0.381918551 | -2.61548956 | 0.008918624 | 0.030281839 | -3.69788913 | ns |
| KLRF1      | -0.02174615 | 0.007081496 | -2.61344263 | 0.00897244  | 0.030429181 | -3.6896665  | ns |
| TIGAR      | -0.02632173 | -0.02390478 | -2.60716891 | 0.009138448 | 0.030956227 | -3.70617997 | ns |
| ANXA3      | -0.03944295 | -0.01449547 | -2.59451562 | 0.009481356 | 0.032080602 | -3.75318613 | ns |
| LAMA4      | -0.01811753 | -0.00547047 | -2.5928526  | 0.009527345 | 0.032198896 | -3.75468463 | ns |
| SLITRK6    | 0.01901543  | 0.001927655 | 2.591449392 | 0.009566477 | 0.032293772 | -3.74836614 | ns |
| AGER       | 0.022659488 | 0.032440312 | 2.589632584 | 0.009616946 | 0.032426652 | -3.75883552 | ns |
| KYNU       | -0.02531573 | -0.01720816 | -2.5847421  | 0.009754219 | 0.032851579 | -3.77931942 | ns |
| SRPK2      | -0.04640435 | 0.120764505 | -2.58372149 | 0.009783226 | 0.032911315 | -3.77687074 | ns |
| TACSTD2    | 0.017160627 | 0.012061232 | 2.581661447 | 0.009842855 | 0.033073805 | -3.73001183 | ns |
| IL31RA     | 0.020776984 | 0.021292701 | 2.578380627 | 0.009935925 | 0.033348161 | -3.77818093 | ns |
| NPY        | -0.03629797 | -0.09276635 | -2.57706776 | 0.009973387 | 0.033414139 | -3.79942282 | ns |
| LHPP       | -0.03357734 | 0.026361004 | -2.57689472 | 0.009978469 | 0.033414139 | -3.79456521 | ns |
| LIFR       | 0.012934124 | -0.0012579  | 2.573484867 | 0.010077306 | 0.033706453 | -3.80307805 | ns |
| TFPI2      | -0.01990008 | -0.00301056 | -2.57205081 | 0.010119088 | 0.03380748  | -3.80768796 | ns |
| MSLN       | -0.03082363 | 0.033705889 | -2.56880788 | 0.010214317 | 0.034086636 | -3.81152147 | ns |
| IMPACT     | -0.02944444 | -0.00900124 | -2.56767192 | 0.010247689 | 0.034138553 | -3.82165699 | ns |
| WASHC3     | -0.03994557 | 0.072432157 | -2.56722002 | 0.010261048 | 0.034138553 | -3.82280898 | ns |
| IL13RA2    | 0.014645104 | -0.01318803 | 2.567096999 | 0.010264948 | 0.034138553 | -3.81094781 | ns |
| IL1RL2     | -0.02156788 | -0.01005191 | -2.56588488 | 0.010300854 | 0.034218991 | -3.81358762 | ns |
| MOG        | 0.01796287  | 0.006724024 | 2.564068918 | 0.010354627 | 0.034358533 | -3.83260098 | ns |
| SIGLEC1    | -0.02365252 | -0.0364217  | -2.56074121 | 0.01045435  | 0.034650058 | -3.83683882 | ns |
| IGF2BP3    | -0.02440003 | 0.075782969 | -2.55341484 | 0.01067702  | 0.035347956 | -3.8439391  | ns |
| CPPED1     | -0.03748875 | -0.01339715 | -2.55294103 | 0.010691248 | 0.035354978 | -3.86024006 | ns |
| ITGB1      | 0.011780203 | 0.010320345 | 2.546591255 | 0.010887811 | 0.035964264 | -3.86819373 | ns |
| PLSCR3     | -0.03075441 | 0.021866194 | -2.54372377 | 0.010977418 | 0.036178895 | -3.88166749 | ns |
| GADD45GIP1 | -0.0266386  | 0.036425935 | -2.54372706 | 0.010977569 | 0.036178895 | -3.86933932 | ns |
| MAPRE3     | -0.07585545 | 0.546414276 | -2.5409967  | 0.011063666 | 0.03642154  | -3.87417729 | ns |
| MVK        | -0.04251389 | -0.01441882 | -2.53441935 | 0.011273396 | 0.037070176 | -3.89324544 | ns |
| FLT4       | -0.01878597 | -0.05505408 | -2.53315325 | 0.011313967 | 0.037161736 | -3.90719677 | ns |
| AMN        | -0.02592873 | -0.00356769 | -2.53075328 | 0.011391852 | 0.037364169 | -3.90246255 | ns |
| MMP13      | 0.017122781 | -0.00648146 | 2.530466507 | 0.01140119  | 0.037364169 | -3.90299549 | ns |
| MDH1       | -0.02073251 | 0.01677717  | -2.52869128 | 0.011458782 | 0.037510812 | -3.91642497 | ns |
| HGFAC      | -0.01405583 | -0.02443488 | -2.52630577 | 0.011536911 | 0.037724278 | -3.91997581 | ns |
| PSAP       | -0.01391133 | -0.01470993 | -2.52538199 | 0.011567257 | 0.037781198 | -3.92388539 | ns |
| CPB1       | 0.030970775 | 0.031093953 | 2.524791468 | 0.011586583 | 0.037802035 | -3.93086993 | ns |
| WFDC1      | -0.02809498 | 0.056233955 | -2.52206264 | 0.011677064 | 0.038054717 | -3.92721856 | ns |
| DCTN6      | -0.03892638 | 0.086028779 | -2.51972846 | 0.011754792 | 0.038265319 | -3.92991287 | ns |
| DNAJC9     | -0.0393757  | -0.0158368  | -2.51792921 | 0.01181472  | 0.038386063 | -3.94619415 | ns |
| CD58       | 0.009540309 | -0.00246532 | 2.517829346 | 0.011818175 | 0.038386063 | -3.94118136 | ns |
| C1QTNF5    | -0.01907535 | 0.003171889 | -2.51621205 | 0.01187263  | 0.038520089 | -3.93922984 | ns |
| TNFRSF12A  | -0.01810162 | -0.03569182 | -2.51378693 | 0.01195435  | 0.038742178 | -3.95571973 | ns |
| GLOD4      | -0.01960915 | -0.01595977 | -2.512706   | 0.011991115 | 0.038818244 | -3.95395376 | ns |
| MYOM1      | -0.0234437  | 0.053938588 | -2.51038499 | 0.012070343 | 0.039031452 | -3.95387832 | ns |
| TFPI       | -0.01733148 | -0.02593067 | -2.50768177 | 0.012162926 | 0.039284387 | -3.96478796 | ns |
| PLA2G15    | -0.01379091 | -0.01449308 | -2.5073133  | 0.012175469 | 0.039284387 | -3.97185662 | ns |
| CBLN4      | -0.01663469 | -0.00472011 | -2.50543423 | 0.012240272 | 0.039449885 | -3.98017626 | ns |
| MTDH       | -0.04613769 | -0.00682864 | -2.50286983 | 0.012329609 | 0.039693999 | -3.97046196 | ns |
| TRIAP1     | -0.03435788 | -0.0090717  | -2.50194454 | 0.012361536 | 0.039752957 | -3.98885178 | ns |
| FUS        | -0.02170565 | 0.009529481 | -2.50150822 | 0.012377113 | 0.039759264 | -3.97451839 | ns |
| ALPP       | -0.06032652 | -0.01356746 | -2.50076558 | 0.012402892 | 0.039793048 | -3.98385633 | ns |
| ADAM15     | 0.016338714 | 0.009517776 | 2.500427637 | 0.012414886 | 0.039793048 | -3.97841598 | ns |
| DMP1       | 0.030104921 | 0.010928345 | 2.49508147  | 0.012603431 | 0.040353091 | -3.99100554 | ns |
| TGFBR3     | 0.01688185  | -0.00747867 | 2.49362298  | 0.012655012 | 0.040473861 | -4.00852566 | ns |
| PADI4      | -0.03979386 | 0.078538967 | -2.49276728 | 0.012685858 | 0.040528123 | -3.99633159 | ns |
| SLAMF8     | -0.02803984 | -0.09001592 | -2.48901039 | 0.012820648 | 0.040913981 | -4.006052   | ns |
| CA12       | 0.0164855   | 0.010701771 | 2.487000402 | 0.012893101 | 0.04110028  | -4.01793921 | ns |
| HSPA1A     | -0.03874904 | 0.024582347 | -2.48516312 | 0.012959747 | 0.04124941  | -4.02559226 | ns |
| PSRC1      | -0.03152187 | 0.098925761 | -2.48493939 | 0.012968137 | 0.04124941  | -4.01610294 | ns |
| FYB1       | -0.04996346 | -0.03554146 | -2.48241903 | 0.013059992 | 0.041496384 | -4.03092717 | ns |
| GCG        | -0.06690327 | 0.020933821 | -2.47159947 | 0.013462    | 0.042727217 | -4.04892274 | ns |

|           |             |             |             |             |             |             |    |
|-----------|-------------|-------------|-------------|-------------|-------------|-------------|----|
| SWAP70    | -0.01789656 | 0.015111235 | -2.46740119 | 0.013620528 | 0.043183432 | -4.07125111 | ns |
| SCRIB     | -0.0456139  | 0.181398674 | -2.46491901 | 0.013715484 | 0.043437325 | -4.06526518 | ns |
| CD164     | -0.01469611 | 0.011745166 | -2.46398313 | 0.013751124 | 0.043441954 | -4.07718649 | ns |
| DMD       | -0.02579278 | 0.068997858 | -2.46375049 | 0.013760258 | 0.043441954 | -4.06812393 | ns |
| GBA       | -0.0269082  | -0.02220117 | -2.46371539 | 0.013761578 | 0.043441954 | -4.06846872 | ns |
| ICAM5     | 0.024290368 | -0.04201857 | 2.463168038 | 0.013782457 | 0.04346088  | -4.07678291 | ns |
| PRND      | -0.0237852  | 0.015342246 | -2.46194233 | 0.013829493 | 0.043562156 | -4.08566467 | ns |
| IRAG2     | -0.04699775 | 0.145537998 | -2.46064627 | 0.013879838 | 0.043673627 | -4.07637938 | ns |
| DAPK2     | -0.02657851 | 0.045879284 | -2.45711243 | 0.014017096 | 0.044058041 | -4.08311363 | ns |
| ITGB6     | 0.016015107 | -0.00077488 | 2.455898312 | 0.014064469 | 0.044159408 | -4.0877454  | ns |
| C9orf40   | -0.04095197 | 0.072596166 | -2.45524145 | 0.014089928 | 0.044191825 | -4.10096837 | ns |
| VWF       | -0.03927823 | -0.04195729 | -2.45170117 | 0.014229216 | 0.044580805 | -4.11145311 | ns |
| GOT1      | -0.01979897 | 0.016197126 | -2.45081174 | 0.014264428 | 0.044643226 | -4.11266221 | ns |
| CCL3      | -0.02891493 | -0.02506131 | -2.4488042  | 0.014344243 | 0.044835109 | -4.11393596 | ns |
| ATP6AP2   | -0.02156494 | 0.028756029 | -2.44850333 | 0.014356447 | 0.044835109 | -4.10532816 | ns |
| PLXNA4    | -0.04323498 | -0.03786337 | -2.44653147 | 0.014434964 | 0.045032151 | -4.11945927 | ns |
| TMPRSS15  | 0.048149955 | -0.00061091 | 2.445635124 | 0.014470915 | 0.045092848 | -4.11922934 | ns |
| TCL1A     | -0.05256782 | -0.04303184 | -2.44527743 | 0.014485305 | 0.045092848 | -4.11864659 | ns |
| ADGRD1    | -0.01845308 | -0.01126659 | -2.44454294 | 0.014514901 | 0.04513686  | -4.11570751 | ns |
| RCC1      | -0.02476668 | 0.097805566 | -2.44343158 | 0.014559441 | 0.045227198 | -4.13001559 | ns |
| CAPN3     | 0.018940404 | 0.041324709 | 2.441860509 | 0.014622927 | 0.045376139 | -4.13382604 | ns |
| THRAP3    | -0.05618756 | 0.382559705 | -2.4407263  | 0.014669222 | 0.045471474 | -4.12328114 | ns |
| SERPINI2  | 0.027228697 | 0.090164688 | 2.437301581 | 0.014808527 | 0.04585461  | -4.14454384 | ns |
| PSAPL1    | -0.02393393 | 0.009602024 | -2.43443977 | 0.014926098 | 0.046169711 | -4.15146558 | ns |
| PSMG4     | -0.02873982 | 0.064253249 | -2.43173604 | 0.015038251 | 0.046467401 | -4.14469336 | ns |
| IGDCC3    | -0.02338988 | 0.07706132  | -2.43031028 | 0.015097488 | 0.046601126 | -4.15025725 | ns |
| ERC2      | -0.03601032 | 0.145471502 | -2.42979471 | 0.015118943 | 0.04661807  | -4.15086283 | ns |
| SOD1      | -0.02492175 | 0.008830319 | -2.42839343 | 0.015177579 | 0.046749506 | -4.15217813 | ns |
| CBS       | -0.02425676 | 0.053951592 | -2.42565678 | 0.015296204 | 0.047065244 | -4.16079561 | ns |
| ASPEN     | 0.012930714 | 0.007381007 | 2.423999961 | 0.01536198  | 0.047217876 | -4.17794161 | ns |
| RBP1      | -0.034555   | 0.140594665 | -2.4235229  | 0.015382445 | 0.047231063 | -4.16597219 | ns |
| PPCDC     | -0.02517636 | 0.011964808 | -2.42286408 | 0.015410063 | 0.047266159 | -4.18157637 | ns |
| DKK1      | -0.03104368 | -0.04478916 | -2.4215306  | 0.015466696 | 0.047390086 | -4.18478363 | ns |
| SPON1     | -0.01626899 | -0.03630137 | -2.42040189 | 0.015514887 | 0.047487914 | -4.18192781 | ns |
| NEDD9     | -0.01636094 | 0.020931097 | -2.41936659 | 0.015559349 | 0.047574136 | -4.17447817 | ns |
| EPHB6     | -0.01531405 | 0.000193873 | -2.41583349 | 0.015710925 | 0.047987344 | -4.18940739 | ns |
| ATP1B2    | 0.015099441 | 0.018758175 | 2.415269128 | 0.015735439 | 0.048011998 | -4.18464237 | ns |
| MCEMP1    | -0.04387988 | 0.065267171 | -2.41420421 | 0.015781487 | 0.048102237 | -4.18686396 | ns |
| APOBR     | 0.020626995 | -0.06262169 | 2.409725183 | 0.015976441 | 0.048637655 | -4.19881519 | ns |
| TNF       | -0.01949868 | -0.00662835 | -2.40940519 | 0.015990462 | 0.048637655 | -4.20024955 | ns |
| PPP1R12B  | -0.03513857 | 0.110767768 | -2.40847195 | 0.016031229 | 0.048710916 | -4.20782783 | ns |
| CCL27     | -0.0309705  | -0.07629135 | -2.40610783 | 0.016135281 | 0.048952532 | -4.21471209 | ns |
| LACRT     | 0.024033788 | 0.134445009 | 2.405902247 | 0.016144277 | 0.048952532 | -4.21952426 | ns |
| AP2B1     | -0.02368384 | 0.078026705 | -2.40308871 | 0.016269216 | 0.049280199 | -4.21492928 | ns |
| F2        | -0.00716911 | -0.00502788 | -2.39562851 | 0.016603688 | 0.050241212 | -4.24562899 | ns |
| IL6R      | -0.01767753 | -0.02117648 | -2.3902724  | 0.016848006 | 0.050927721 | -4.24861706 | ns |
| CARHSP1   | -0.02686608 | 0.032933344 | -2.38971942 | 0.016873464 | 0.050928596 | -4.24673509 | ns |
| CHGA      | -0.03701669 | 0.07489896  | -2.38950081 | 0.016883178 | 0.050928596 | -4.25999817 | ns |
| IDI2      | -0.02381564 | 0.025150723 | -2.38777333 | 0.016963038 | 0.05109571  | -4.25135021 | ns |
| CRYBB1    | -0.03133794 | 0.013665339 | -2.38753781 | 0.016973575 | 0.05109571  | -4.26504359 | ns |
| TRIM58    | -0.0416311  | 0.022676065 | -2.38489498 | 0.017095984 | 0.051411197 | -4.27033526 | ns |
| CLSTN3    | -0.01452464 | 0.002806415 | -2.38396781 | 0.017139062 | 0.051487716 | -4.2732618  | ns |
| TNXB      | 0.012940191 | 0.005160074 | 2.383480438 | 0.017161866 | 0.051503237 | -4.27091802 | ns |
| TNFAIP8L2 | -0.02995526 | 0.055873011 | -2.38092366 | 0.017281578 | 0.051809249 | -4.26809438 | ns |
| FCGR2B    | -0.02968901 | 0.025043393 | -2.37980158 | 0.017334352 | 0.051872363 | -4.26998357 | ns |
| SCG3      | 0.017284611 | 0.010986714 | 2.379713857 | 0.017338224 | 0.051872363 | -4.27888747 | ns |
| CDC25A    | 0.019780318 | 0.022917025 | 2.379343373 | 0.017355924 | 0.051872363 | -4.26897374 | ns |
| VWA5A     | -0.03738342 | 0.153254762 | -2.37010993 | 0.017795352 | 0.053131317 | -4.29074146 | ns |
| EPCAM     | 0.050926854 | 0.117250887 | 2.369456221 | 0.017826579 | 0.053170185 | -4.3020477  | ns |
| SDC4      | -0.02339707 | -0.0308522  | -2.36891538 | 0.017852674 | 0.053193682 | -4.30287688 | ns |
| DPEP1     | 0.025230998 | -0.05640025 | 2.36741543  | 0.017925236 | 0.053355441 | -4.30437657 | ns |
| PPP1R14D  | 0.01773329  | 0.021593085 | 2.359884625 | 0.018292923 | 0.054394435 | -4.33097825 | ns |
| PTPRK     | -0.01013522 | 0.011105959 | -2.35854174 | 0.018359268 | 0.054519345 | -4.33207117 | ns |
| MYBPC1    | -0.03252699 | 0.055926679 | -2.35827842 | 0.018372272 | 0.054519345 | -4.33398537 | ns |
| TRAF3     | -0.0177702  | 0.046941262 | -2.35765841 | 0.018403344 | 0.054556107 | -4.3208001  | ns |
| DNAJA2    | -0.04214274 | -0.04836276 | -2.35410728 | 0.018579686 | 0.055023005 | -4.34262196 | ns |

|          |             |             |             |             |             |             |    |
|----------|-------------|-------------|-------------|-------------|-------------|-------------|----|
| CSPG4    | 0.015499759 | 0.004740762 | 2.353601043 | 0.018604984 | 0.0550421   | -4.34453736 | ns |
| TMEM25   | 0.020828833 | 0.030939852 | 2.352751743 | 0.018647481 | 0.0551199   | -4.34766771 | ns |
| NDUFA5   | -0.01663852 | -0.00320435 | -2.35106276 | 0.01873274  | 0.055307988 | -4.335102   | ns |
| EREG     | -0.0406899  | 0.055358132 | -2.3496976  | 0.018801361 | 0.055454519 | -4.34586647 | ns |
| PLIN3    | -0.02145399 | 0.011751979 | -2.34923996 | 0.018824417 | 0.055466497 | -4.34896246 | ns |
| LILRB5   | -0.03611814 | -0.1654132  | -2.34859384 | 0.018856933 | 0.055506294 | -4.35718624 | ns |
| MAP2K1   | -0.03034266 | 0.02138386  | -2.34783044 | 0.018895648 | 0.055564242 | -4.35709934 | ns |
| TANK     | -0.03521663 | 0.03529172  | -2.34638328 | 0.018969454 | 0.055667303 | -4.34880515 | ns |
| CDH5     | 0.014936782 | 0.02301617  | 2.346321166 | 0.018972279 | 0.055667303 | -4.36248381 | ns |
| SCGN     | 0.022066516 | 0.019422048 | 2.346021136 | 0.018987888 | 0.055667303 | -4.34964869 | ns |
| LRIG3    | -0.01295335 | 0.005890878 | -2.33853712 | 0.01937248  | 0.056710914 | -4.3637313  | ns |
| TGFB1    | -0.0134822  | -0.01174741 | -2.33833684 | 0.019382703 | 0.056710914 | -4.37052764 | ns |
| PRAME    | 0.011993165 | -0.00051939 | 2.335651569 | 0.019522497 | 0.057062754 | -4.37122985 | ns |
| AGRP     | -0.02628925 | -0.06768214 | -2.33160913 | 0.019733983 | 0.057623232 | -4.39718355 | ns |
| CHGB     | 0.020064039 | -0.00350925 | 2.330592583 | 0.019787662 | 0.05772225  | -4.39738998 | ns |
| MYL4     | -0.02455893 | 0.067817221 | -2.32288532 | 0.020198552 | 0.058862047 | -4.40281992 | ns |
| LRRC38   | -0.02228928 | 0.009561434 | -2.32230949 | 0.020229491 | 0.058888011 | -4.40440818 | ns |
| ESM1     | 0.017592427 | 0.024057836 | 2.321966189 | 0.020247795 | 0.058888011 | -4.41234199 | ns |
| ELN      | -0.01552198 | -0.04060549 | -2.31888558 | 0.020414189 | 0.059312867 | -4.42546214 | ns |
| PTPRS    | -0.01192827 | 0.002261013 | -2.31732716 | 0.020498868 | 0.059456973 | -4.42961888 | ns |
| ADGRG1   | -0.03081433 | 0.085784056 | -2.31722685 | 0.020504511 | 0.059456973 | -4.42284544 | ns |
| GSR      | -0.01038348 | -0.00752614 | -2.31449443 | 0.020653727 | 0.059830242 | -4.4311711  | ns |
| NAPRT    | -0.01554736 | 0.036937627 | -2.31349575 | 0.020708416 | 0.059929213 | -4.43761892 | ns |
| SLMAP    | -0.03916235 | 0.053210249 | -2.31105783 | 0.020842747 | 0.060258238 | -4.44215645 | ns |
| UHRF2    | 0.016250116 | 0.026746076 | 2.310630698 | 0.02086673  | 0.060267905 | -4.43010785 | ns |
| FDX1     | -0.0291072  | 0.029802993 | -2.30896619 | 0.020958951 | 0.060473842 | -4.43392477 | ns |
| RABGAP1L | -0.03005604 | 0.039207529 | -2.3084613  | 0.020986928 | 0.060473842 | -4.43642952 | ns |
| SIL1     | -0.01499578 | 0.036300461 | -2.30769544 | 0.021029554 | 0.060473842 | -4.43773532 | ns |
| GFRA2    | 0.010178406 | -0.0100504  | 2.307535376 | 0.021038273 | 0.060473842 | -4.44509659 | ns |
| MTUS1    | -0.02553084 | 0.001213783 | -2.30725791 | 0.021053758 | 0.060473842 | -4.44477445 | ns |
| SELENOP  | 0.010165203 | 0.003889723 | 2.307101282 | 0.021062294 | 0.060473842 | -4.45232631 | ns |
| KLRK1    | -0.02079353 | -0.05432116 | -2.30000837 | 0.021460967 | 0.061557979 | -4.46851278 | ns |
| ZNRD2    | -0.03131385 | 0.042293767 | -2.29750623 | 0.021603198 | 0.06190514  | -4.47316372 | ns |
| PVR      | -0.01754936 | -0.01870719 | -2.2936395  | 0.021824524 | 0.06247805  | -4.48418348 | ns |
| LRP2BP   | -0.03851433 | 0.218250407 | -2.29166573 | 0.021938625 | 0.062743178 | -4.47459372 | ns |
| AHCY     | -0.03316372 | -0.01930193 | -2.28993648 | 0.022038538 | 0.062967252 | -4.48554497 | ns |
| NELL1    | 0.019753215 | 0.038081458 | 2.289558249 | 0.02206037  | 0.062968016 | -4.49043618 | ns |
| BMP4     | 0.022717041 | 0.039707954 | 2.285241785 | 0.022312324 | 0.063624988 | -4.49437895 | ns |
| NTRK2    | -0.01243006 | -0.00515125 | -2.28259282 | 0.022468014 | 0.064006441 | -4.50221542 | ns |
| PDGFB    | -0.04232999 | -0.07750377 | -2.2814937  | 0.022532821 | 0.064128497 | -4.50813943 | ns |
| CDHR1    | -0.02078926 | 0.027509691 | -2.28065947 | 0.022582503 | 0.06420731  | -4.49957377 | ns |
| TBC1D5   | -0.03903286 | 0.097886446 | -2.27997051 | 0.022623095 | 0.064260154 | -4.51029529 | ns |
| LEFTY2   | 0.025441892 | 0.002759612 | 2.278708914 | 0.022697915 | 0.064344671 | -4.5179075  | ns |
| NAGK     | -0.02613953 | 0.008383735 | -2.27812951 | 0.022732817 | 0.064344671 | -4.5039689  | ns |
| ABL1     | -0.03416774 | 0.054459085 | -2.27774508 | 0.022755503 | 0.064344671 | -4.51291016 | ns |
| CEACAM6  | -0.01775854 | -0.00209125 | -2.27738438 | 0.022776856 | 0.064344671 | -4.51977798 | ns |
| IPCEF1   | -0.04469282 | -0.05433919 | -2.2773688  | 0.022778001 | 0.064344671 | -4.51221176 | ns |
| GAS6     | 0.012190788 | -0.00389406 | 2.27724816  | 0.022785065 | 0.064344671 | -4.51730302 | ns |
| CELA3A   | 0.027376976 | 0.035984228 | 2.272333961 | 0.023079998 | 0.065114584 | -4.53111954 | ns |
| TNIP1    | -0.04125218 | 0.017423636 | -2.27180672 | 0.023111829 | 0.065141449 | -4.53252745 | ns |
| FSHB     | 0.029975155 | 0.487550514 | 2.271293509 | 0.023143248 | 0.065167101 | -4.52047709 | ns |
| VWA1     | -0.02083318 | -0.01039964 | -2.26641908 | 0.023433946 | 0.065937595 | -4.54564174 | ns |
| ERCC1    | 0.01467444  | 0.004867171 | 2.25626101  | 0.024068604 | 0.067642275 | -4.55218828 | ns |
| AHSP     | -0.04218891 | -0.00631884 | -2.24777186 | 0.024604894 | 0.069082973 | -4.58195116 | ns |
| TXN      | -0.01987998 | 0.030304596 | -2.24197225 | 0.024977523 | 0.070061831 | -4.59034596 | ns |
| GAL      | 0.031674196 | 0.068500376 | 2.237215082 | 0.025286521 | 0.070860499 | -4.60747671 | ns |
| MFAP4    | 0.014017873 | 0.016450145 | 2.236809622 | 0.02531328  | 0.070867476 | -4.59844011 | ns |
| REG1A    | 0.022689204 | 0.030304079 | 2.236288711 | 0.025347342 | 0.070894865 | -4.60225622 | ns |
| MATN2    | -0.01411772 | -0.00991168 | -2.23547064 | 0.025400782 | 0.070976349 | -4.60938592 | ns |
| CD7      | -0.01903029 | -0.00790243 | -2.23357997 | 0.025525402 | 0.071256381 | -4.60257864 | ns |
| IGFBP1   | -0.01519843 | -0.00875039 | -2.22801727 | 0.025893835 | 0.072215853 | -4.62442798 | ns |
| AP3B1    | -0.03466689 | 0.032140695 | -2.22724514 | 0.025945232 | 0.072290151 | -4.63100558 | ns |
| ST13     | -0.02547007 | -0.0014959  | -2.22579717 | 0.026042432 | 0.072491802 | -4.62283601 | ns |
| LRRC59   | -0.02067076 | 0.06827152  | -2.22530791 | 0.026074918 | 0.072513105 | -4.63659142 | ns |
| CHL1     | 0.014820659 | 0.032665862 | 2.223912298 | 0.026168837 | 0.072705046 | -4.63518979 | ns |
| ECHDC3   | -0.03215049 | 0.055146059 | -2.21644587 | 0.026675455 | 0.074042138 | -4.65613547 | ns |



|          |             |             |             |             |             |             |    |
|----------|-------------|-------------|-------------|-------------|-------------|-------------|----|
| HDAC9    | -0.02931574 | 0.087882006 | -2.21082679 | 0.027062786 | 0.075045902 | -4.65591673 | ns |
| EIF2S2   | -0.01878306 | 0.058394612 | -2.20476878 | 0.027485367 | 0.07614542  | -4.66829149 | ns |
| IL2RA    | -0.01869729 | -0.01663132 | -2.2016917  | 0.027702062 | 0.076636182 | -4.67891133 | ns |
| FAM13A   | -0.03021112 | 0.053318985 | -2.20150509 | 0.027715003 | 0.076636182 | -4.68760465 | ns |
| FOLH1    | -0.04861582 | 0.318674446 | -2.20022775 | 0.027805895 | 0.076786148 | -4.67698594 | ns |
| CLEC1A   | -0.01490387 | -0.0125372  | -2.2000027  | 0.02782183  | 0.076786148 | -4.67938633 | ns |
| EIF4G1   | -0.04784458 | -0.09664997 | -2.19774978 | 0.027981648 | 0.077154307 | -4.69821566 | ns |
| CEP164   | -0.02930627 | 0.098847399 | -2.19729485 | 0.028014522 | 0.07717208  | -4.68507465 | ns |
| TNFSF12  | -0.01343441 | 0.020499813 | -2.195847   | 0.02811763  | 0.07738311  | -4.7023666  | ns |
| NTF4     | -0.01884039 | 0.050154806 | -2.19419799 | 0.028236417 | 0.077588201 | -4.69140168 | ns |
| GGT5     | 0.01007258  | -0.00087408 | 2.194071341 | 0.028245294 | 0.077588201 | -4.69813396 | ns |
| CD55     | -0.01214512 | -0.00149866 | -2.19330467 | 0.028301033 | 0.077668249 | -4.68189466 | ns |
| TNFAIP2  | -0.02091924 | 0.023714261 | -2.19285144 | 0.028332927 | 0.077682767 | -4.70648523 | ns |
| CDH23    | 0.011581408 | 0.015483431 | 2.186826815 | 0.028770064 | 0.078807304 | -4.7206503  | ns |
| CD109    | 0.015637985 | -0.00691789 | 2.183132438 | 0.029041134 | 0.079475269 | -4.72514519 | ns |
| CFC1     | -0.02165473 | 0.017080982 | -2.18105495 | 0.029194787 | 0.079804145 | -4.71994753 | ns |
| PF4      | -0.04229158 | -0.05642136 | -2.18076425 | 0.029215969 | 0.079804145 | -4.72983599 | ns |
| CRELD2   | -0.0243825  | -0.02925098 | -2.17975999 | 0.029290369 | 0.079932596 | -4.73239557 | ns |
| STIP1    | -0.03137601 | 0.019212221 | -2.17923869 | 0.02932911  | 0.079963587 | -4.73256244 | ns |
| PQBP1    | -0.02715155 | 0.044443246 | -2.17810821 | 0.02941346  | 0.080067135 | -4.72632414 | ns |
| NAGPA    | -0.00930101 | -0.00723809 | -2.17792463 | 0.029427024 | 0.080067135 | -4.72748955 | ns |
| AMIGO2   | 0.010447693 | -0.01109965 | 2.177591645 | 0.029451679 | 0.080067135 | -4.73443909 | ns |
| LRRFIP1  | -0.02169051 | 0.057675848 | -2.17725309 | 0.029476771 | 0.080067135 | -4.74065819 | ns |
| GMPT2    | -0.02937853 | 0.02200311  | -2.1759241  | 0.029576342 | 0.080262935 | -4.73181339 | ns |
| PSME2    | -0.01756309 | -0.00070037 | -2.17537828 | 0.029617129 | 0.080298995 | -4.73686513 | ns |
| GALNT5   | 0.011661392 | -0.00234879 | 2.174134188 | 0.029710149 | 0.08047647  | -4.74837378 | ns |
| TXLNA    | -0.04204385 | -0.04624047 | -2.17206677 | 0.029865962 | 0.080823549 | -4.74583157 | ns |
| EFHD1    | -0.01464918 | -0.0017446  | -2.17035879 | 0.029994786 | 0.081097015 | -4.75727794 | ns |
| KIF22    | -0.05323349 | -0.16132158 | -2.16951703 | 0.030059069 | 0.081195635 | -4.74393644 | ns |
| ERBB2    | -0.01137897 | -0.025448   | -2.16824723 | 0.030155106 | 0.08137977  | -4.75892911 | ns |
| TRAF3IP2 | 0.020447981 | 0.067928226 | 2.16696874  | 0.030252891 | 0.081568276 | -4.74942208 | ns |
| DDI2     | -0.03431763 | 0.046574761 | -2.16534191 | 0.030377072 | 0.081827536 | -4.75461908 | ns |
| TNFSF13B | -0.01228064 | -0.01005825 | -2.16268653 | 0.030580559 | 0.082299753 | -4.77266157 | ns |
| VT1A     | -0.02566001 | 0.054787506 | -2.15880706 | 0.030880795 | 0.083031235 | -4.76864687 | ns |
| CALCOCO2 | -0.03345428 | 0.032612566 | -2.15701121 | 0.031020543 | 0.083330254 | -4.77169867 | ns |
| JAM3     | -0.02137373 | 0.039494943 | -2.1560064  | 0.031098863 | 0.083463859 | -4.77464582 | ns |
| CYB5R2   | -0.0238802  | 0.014019797 | -2.15385792 | 0.031266894 | 0.08383777  | -4.7845543  | ns |
| PAEP     | -0.06304187 | 0.603761557 | -2.15261361 | 0.031364676 | 0.0840228   | -4.78759854 | ns |
| IL25     | -0.01481871 | -0.01733542 | -2.15190264 | 0.031420969 | 0.084096453 | -4.77846821 | ns |
| SEPTIN7  | -0.02309218 | 0.063744073 | -2.14812527 | 0.031719491 | 0.084817686 | -4.79675783 | ns |
| OPTC     | 0.021031147 | 0.035810386 | 2.14553659  | 0.03192566  | 0.085290876 | -4.80323888 | ns |
| RNASEH2A | -0.02150727 | 0.083288805 | -2.14317531 | 0.03211452  | 0.085717001 | -4.81549858 | ns |
| POLR2A   | 0.012772949 | 0.012630235 | 2.14233259  | 0.03218274  | 0.08582064  | -4.80178925 | ns |
| DUSP13   | 0.017830703 | 0.043209695 | 2.140903548 | 0.032297419 | 0.086047868 | -4.81859181 | ns |
| SELPLG   | -0.01232433 | -0.01906227 | -2.14033084 | 0.032343757 | 0.086092772 | -4.81674712 | ns |
| VIM      | -0.05310233 | -0.15861497 | -2.13904105 | 0.032448371 | 0.086292571 | -4.81069733 | ns |
| ATXN3    | -0.02732335 | 0.011150893 | -2.13857822 | 0.032485428 | 0.08631251  | -4.82427024 | ns |
| SCN4B    | -0.0175533  | -0.01807436 | -2.13795614 | 0.032536333 | 0.086369174 | -4.81232612 | ns |
| TNFRSF8  | -0.02021392 | 0.016251564 | -2.13661495 | 0.032644928 | 0.086538111 | -4.82958836 | ns |
| CLPP     | -0.04400181 | -0.01695133 | -2.13614664 | 0.032683355 | 0.086538111 | -4.82143846 | ns |
| CHMP6    | -0.02422648 | -0.00209713 | -2.13607562 | 0.032688883 | 0.086538111 | -4.82982264 | ns |
| DBI      | -0.03688828 | -0.00851293 | -2.1283477  | 0.033324217 | 0.088140139 | -4.83972695 | ns |
| ADAMTSL5 | 0.016582779 | 0.005379238 | 2.125981122 | 0.033520605 | 0.088579336 | -4.8511846  | ns |
| GOLGA3   | -0.03309629 | 0.05655925  | -2.12306954 | 0.033763804 | 0.089141326 | -4.85808864 | ns |
| AMOTL2   | -0.02094459 | 0.101791668 | -2.12257364 | 0.033805518 | 0.089170832 | -4.85524573 | ns |
| SERPINF2 | -0.00582443 | 0.00282687  | -2.11925791 | 0.034084863 | 0.089826535 | -4.85526168 | ns |
| CD80     | -0.0137421  | -0.01691122 | -2.11851119 | 0.034147676 | 0.089910923 | -4.86692735 | ns |
| NECTIN4  | -0.01267525 | -0.00957149 | -2.11420673 | 0.034513605 | 0.090647711 | -4.87383295 | ns |
| HCLS1    | -0.0256982  | -0.04580436 | -2.11395745 | 0.034534797 | 0.090647711 | -4.87760414 | ns |
| PRUNE2   | -0.01248221 | 0.013648507 | -2.11386683 | 0.034542816 | 0.090647711 | -4.86924652 | ns |
| IL17C    | -0.03135598 | 0.029765727 | -2.11376513 | 0.034551679 | 0.090647711 | -4.86383702 | ns |
| PGA4     | -0.02681424 | 0.005538634 | -2.10578201 | 0.035239354 | 0.092368864 | -4.89249576 | ns |
| MYO9B    | -0.03034751 | 0.098124964 | -2.10422923 | 0.035374937 | 0.092575336 | -4.88380455 | ns |
| ENDOU    | -0.02199616 | 0.032050028 | -2.10416318 | 0.035381533 | 0.092575336 | -4.86232136 | ns |
| PRDX3    | -0.03224025 | 0.01579031  | -2.10345638 | 0.035442386 | 0.092651538 | -4.8854189  | ns |
| CD5L     | -0.01947517 | 0.013826106 | -2.10257508 | 0.035519131 | 0.092769108 | -4.89656573 | ns |

|          |             |             |             |             |             |             |    |
|----------|-------------|-------------|-------------|-------------|-------------|-------------|----|
| ALDH5A1  | -0.01959954 | 0.044616667 | -2.10203399 | 0.035566366 | 0.092809464 | -4.90221877 | ns |
| MKI67    | -0.01648383 | 0.045300991 | -2.09538404 | 0.036153551 | 0.094257471 | -4.90055324 | ns |
| NINJ1    | -0.02581548 | 0.09235126  | -2.09312186 | 0.036354985 | 0.094698087 | -4.90652319 | ns |
| PNMA1    | -0.02339153 | 0.061157013 | -2.088066   | 0.036808619 | 0.095794268 | -4.91699071 | ns |
| CLEC4C   | -0.02087543 | -0.00674288 | -2.08505987 | 0.037080354 | 0.096346309 | -4.93269895 | ns |
| AKR1C4   | -0.02383491 | 0.040982254 | -2.084993   | 0.03708673  | 0.096346309 | -4.92403257 | ns |
| EPS8L2   | -0.01321362 | -0.01011755 | -2.08406619 | 0.037170496 | 0.096465109 | -4.93929915 | ns |
| PTH1R    | -0.0171814  | 0.036501877 | -2.08371068 | 0.037202999 | 0.096465109 | -4.9354915  | ns |
| CD82     | 0.017620427 | 0.063498084 | 2.083091509 | 0.037259482 | 0.096465109 | -4.93337209 | ns |
| SYAP1    | -0.02366084 | 0.062045785 | -2.08292094 | 0.037275165 | 0.096465109 | -4.92844176 | ns |
| MUC2     | 0.03856505  | 0.023005902 | 2.082670511 | 0.03729764  | 0.096465109 | -4.94129707 | ns |
| FKBP4    | -0.01993782 | -0.02131707 | -2.08165496 | 0.037390612 | 0.096619988 | -4.93676738 | ns |
| TDO2     | -0.01594961 | 0.031305279 | -2.07961987 | 0.037577226 | 0.097016357 | -4.93472822 | ns |
| PTN      | -0.02161631 | -0.04440961 | -2.07886256 | 0.037646863 | 0.097110283 | -4.93670466 | ns |
| SLC51B   | 0.031809256 | 0.179493295 | 2.077967708 | 0.037729262 | 0.097236934 | -4.93697003 | ns |
| INSL5    | -0.03993972 | 0.07745515  | -2.07712313 | 0.037806665 | 0.097332852 | -4.95183932 | ns |
| CEP20    | -0.03297659 | 0.010310323 | -2.07684126 | 0.037833146 | 0.097332852 | -4.94022548 | ns |
| VSTM1    | -0.02199203 | -0.00777882 | -2.07490412 | 0.038012352 | 0.097707806 | -4.94445283 | ns |
| FOLR1    | 0.011971088 | 0.006530722 | 2.074536511 | 0.038046102 | 0.097708548 | -4.95411133 | ns |
| CREB3    | 0.022870826 | 0.072483621 | 2.070788579 | 0.038395596 | 0.098519455 | -4.95057473 | ns |
| ACP5     | -0.01456433 | -0.05512518 | -2.06903045 | 0.038559863 | 0.098854083 | -4.96701585 | ns |
| ARHGEF1  | -0.03764837 | -0.03548987 | -2.06820909 | 0.038636914 | 0.098964726 | -4.97125478 | ns |
| ADAMTSL4 | 0.009735342 | 0.001425792 | 2.067384733 | 0.038714938 | 0.099077667 | -4.95965385 | ns |
| RTBDN    | 0.012793152 | 0.002371294 | 2.064304248 | 0.039005697 | 0.099688545 | -4.9730218  | ns |
| ASAH1    | -0.01945206 | -0.00626588 | -2.06413275 | 0.03902192  | 0.099688545 | -4.97450996 | ns |
| MMP12    | -0.022709   | -0.05599083 | -2.06272924 | 0.039155107 | 0.099941356 | -4.98004162 | ns |
| SHD      | -0.03544859 | 0.212118268 | -2.06221093 | 0.039204838 | 0.099980897 | -4.96834874 | ns |
| CASP1    | -0.03025213 | -0.00098782 | -2.05873031 | 0.039537231 | 0.10074059  | -4.97764265 | ns |
| RARRES1  | -0.01478777 | 0.017547976 | -2.05767481 | 0.039638555 | 0.100884386 | -4.97956464 | ns |
| NTF3     | 0.015612826 | 0.011981507 | 2.057419343 | 0.039662766 | 0.100884386 | -4.98954828 | ns |
| CNP      | -0.03327686 | -0.0023474  | -2.05534039 | 0.039863357 | 0.101306356 | -4.98322658 | ns |
| ERMAP    | -0.01849157 | -0.01702093 | -2.04992238 | 0.040389312 | 0.102509743 | -4.99410501 | ns |
| SDK2     | -0.01562735 | 0.019304664 | -2.04954771 | 0.040425774 | 0.102509743 | -4.99690731 | ns |
| EPHA2    | -0.01236873 | -0.02213227 | -2.04938239 | 0.0404422   | 0.102509743 | -4.99023205 | ns |
| SPAG1    | -0.02383138 | 0.053027227 | -2.04326747 | 0.041042816 | 0.103843441 | -5.02317685 | ns |
| ENPEP    | -0.0179439  | 0.057241602 | -2.04256392 | 0.041113034 | 0.103843441 | -5.00938972 | ns |
| CACNB1   | -0.02410078 | 0.082709257 | -2.0424835  | 0.041120951 | 0.103843441 | -5.01136789 | ns |
| ATG4A    | -0.02661664 | 0.029637334 | -2.04234098 | 0.04113512  | 0.103843441 | -5.01077487 | ns |
| ALPI     | 0.050840226 | 0.218777755 | 2.042229455 | 0.041146185 | 0.103843441 | -5.00973277 | ns |
| PRDX6    | 0.026562414 | 0.071347133 | 2.039705352 | 0.041396579 | 0.104385157 | -5.03118898 | ns |
| ENPP7    | -0.03828229 | -0.08705465 | -2.03840768 | 0.041526873 | 0.104623357 | -5.01076283 | ns |
| DPP7     | -0.02589735 | -0.0288278  | -2.03639976 | 0.041727495 | 0.105038176 | -5.02770435 | ns |
| PDIA4    | -0.02483905 | 0.038371811 | -2.03476882 | 0.041891141 | 0.105359288 | -5.03922831 | ns |
| DSC2     | -0.0140454  | -0.01553323 | -2.03400235 | 0.041968708 | 0.105463534 | -5.03103972 | ns |
| ATOX1    | -0.03163951 | -0.06073943 | -2.03336206 | 0.042033028 | 0.105534345 | -5.04031807 | ns |
| STX7     | -0.02117845 | -0.01084607 | -2.03230634 | 0.042140193 | 0.105712512 | -5.0298043  | ns |
| EIF1AX   | -0.02224741 | 0.097428929 | -2.03006194 | 0.042367287 | 0.106190967 | -5.04888094 | ns |
| HMMR     | -0.01972974 | 0.057454686 | -2.0265692  | 0.042724159 | 0.106923773 | -5.03910787 | ns |
| SULT2A1  | -0.02362257 | 0.05863813  | -2.02647991 | 0.042732892 | 0.106923773 | -5.05228322 | ns |
| EIF4B    | -0.02487374 | -0.04025364 | -2.02317037 | 0.043072973 | 0.107682433 | -5.05595695 | ns |
| CENPF    | -0.02314946 | 0.062890825 | -2.0195105  | 0.043451625 | 0.108536137 | -5.06287704 | ns |
| ADA2     | -0.01777212 | -0.01800107 | -2.01782803 | 0.043626747 | 0.108880428 | -5.06353179 | ns |
| COL1A1   | 0.010994516 | 0.012764636 | 2.016817198 | 0.043731791 | 0.109049384 | -5.07631154 | ns |
| UBE2L6   | -0.0251753  | 0.006833735 | -2.01576463 | 0.043841829 | 0.109230496 | -5.07784419 | ns |
| DNM3     | -0.02208364 | 0.052783543 | -2.01333404 | 0.044096727 | 0.109759161 | -5.08347067 | ns |
| SPART    | -0.03182606 | 0.012599756 | -2.01302941 | 0.044129197 | 0.109759161 | -5.07055866 | ns |
| MAP2     | -0.01837057 | 0.062906109 | -2.00952572 | 0.044498709 | 0.110584027 | -5.0900723  | ns |
| CLNS1A   | -0.01389384 | 0.035504115 | -2.00533453 | 0.04494509  | 0.111598352 | -5.08537296 | ns |
| CPA4     | -0.01743519 | -0.00519132 | -2.00453765 | 0.045030655 | 0.111715813 | -5.07650062 | ns |
| AAMDC    | -0.02142235 | 0.012003783 | -2.00275447 | 0.045221518 | 0.111920957 | -5.0902432  | ns |
| CHIT1    | -0.06576327 | -0.33566846 | -2.00261048 | 0.045236651 | 0.111920957 | -5.0998765  | ns |
| GHRHR    | -0.02374636 | 0.085430385 | -2.00251686 | 0.045247056 | 0.111920957 | -5.09097774 | ns |
| NAMPT    | -0.02306389 | 0.040595742 | -2.00233473 | 0.045266661 | 0.111920957 | -5.09110448 | ns |
| CD63     | -0.02244995 | -0.05073654 | -2.00104053 | 0.045405722 | 0.112169805 | -5.09914991 | ns |
| AMDHD2   | 0.010279969 | -0.03569156 | 1.999384272 | 0.045584236 | 0.112467554 | -5.11010672 | ns |
| SLC9A3R2 | -0.02029698 | 0.062944497 | -1.99920836 | 0.045603282 | 0.112467554 | -5.10953838 | ns |

|             |             |             |             |             |             |             |    |
|-------------|-------------|-------------|-------------|-------------|-------------|-------------|----|
| VTCN1       | 0.012979885 | 0.000449847 | 1.995886921 | 0.045964231 | 0.113262072 | -5.10390258 | ns |
| STK11       | -0.03101574 | -0.00298081 | -1.99078045 | 0.046523063 | 0.114542448 | -5.11465991 | ns |
| PKD1        | 0.010224121 | -0.01444359 | 1.986656257 | 0.046978094 | 0.115565319 | -5.1356928  | ns |
| CLEC1B      | -0.04128448 | -0.0024357  | -1.98488043 | 0.047175367 | 0.115952921 | -5.14010869 | ns |
| ELAVL4      | -0.03372261 | 0.071513876 | -1.98401487 | 0.047272285 | 0.116093416 | -5.12824281 | ns |
| SART1       | -0.01509225 | 0.02881335  | -1.98311973 | 0.047372225 | 0.116241091 | -5.12818751 | ns |
| BCR         | -0.03904281 | -0.03220914 | -1.98116483 | 0.047590615 | 0.116676322 | -5.14245245 | ns |
| LGMN        | -0.0153117  | -0.01921954 | -1.98081729 | 0.047629512 | 0.116676322 | -5.14444206 | ns |
| SPACA5_SPAC | 0.011492749 | 0.002076908 | 1.978100222 | 0.047935055 | 0.11732637  | -5.15330135 | ns |
| RILP        | -0.02608108 | -0.00541491 | -1.97696751 | 0.04806302  | 0.117541054 | -5.15495494 | ns |
| PARK7       | -0.02275056 | -0.00786113 | -1.97374992 | 0.048428067 | 0.11830551  | -5.15728814 | ns |
| STXBP1      | -0.03070703 | -0.04055021 | -1.97349729 | 0.04845664  | 0.11830551  | -5.16233301 | ns |
| B3GAT3      | 0.008074502 | 0.005472928 | 1.972247321 | 0.048599681 | 0.118555612 | -5.14953644 | ns |
| LRRC37A2    | 0.016910164 | 0.009153847 | 1.967477984 | 0.049145978 | 0.119788193 | -5.17203395 | ns |
| TBC1D17     | -0.01881578 | 0.041676135 | -1.96630149 | 0.049282123 | 0.119960469 | -5.16233273 | ns |
| AIF1        | -0.02210947 | -0.01505848 | -1.96615714 | 0.049298823 | 0.119960469 | -5.16237889 | ns |
| DNAJC6      | -0.03336752 | 0.033372294 | -1.96566866 | 0.049355221 | 0.119997706 | -5.16330568 | ns |
| DTX2        | 0.02558438  | 0.139973222 | 1.962585682 | 0.049712651 | 0.120766173 | -5.16958182 | ns |
| MAN1A2      | -0.01016082 | -0.00399554 | -1.9617272  | 0.049812623 | 0.120908446 | -5.17099048 | ns |
| SATB1       | -0.01196061 | 0.036292245 | -1.95456582 | 0.050652264 | 0.122796458 | -5.1992583  | ns |
| NFYA        | -0.01543037 | 0.041567128 | -1.95438204 | 0.050674566 | 0.122796458 | -5.18436174 | ns |
| LONP1       | -0.03376681 | 0.009066422 | -1.95038801 | 0.051148393 | 0.12384188  | -5.19301293 | ns |
| FLT1        | -0.00893085 | -0.00074714 | -1.9497648  | 0.051222443 | 0.123918421 | -5.20027682 | ns |
| MECR        | -0.03551954 | -0.01244222 | -1.947804   | 0.051456952 | 0.124382699 | -5.19801361 | ns |
| IL31        | 0.02177373  | 0.107510903 | 1.946528433 | 0.051609896 | 0.124649212 | -5.19923468 | ns |
| SOD2        | -0.01526791 | 0.000823853 | -1.94572277 | 0.051706255 | 0.124778732 | -5.21183125 | ns |
| CCN1        | -0.03225635 | -0.1504574  | -1.94485228 | 0.05181109  | 0.124928475 | -5.21016302 | ns |
| HEXIM1      | -0.03457607 | -0.00232697 | -1.94173433 | 0.05218755  | 0.125683251 | -5.21925412 | ns |
| GAMT        | 0.014270589 | 0.048941785 | 1.941550512 | 0.0522102   | 0.125683251 | -5.20917916 | ns |
| SDHB        | -0.02648652 | 0.110010598 | -1.94110263 | 0.052263976 | 0.125709068 | -5.22322177 | ns |
| PTRHD1      | -0.02356263 | -0.00351064 | -1.93996606 | 0.052402355 | 0.12593817  | -5.21394265 | ns |
| FCRL6       | -0.02830725 | -0.06208882 | -1.93540018 | 0.052959557 | 0.12717262  | -5.23144773 | ns |
| PCDH1       | -0.0084456  | 0.012253928 | -1.93283155 | 0.053275171 | 0.127825391 | -5.24023955 | ns |
| SPRR3       | -0.02567319 | 0.035261931 | -1.93065103 | 0.05354444  | 0.128337708 | -5.24438712 | ns |
| CRTAM       | -0.02084687 | -0.01534863 | -1.93039347 | 0.053576598 | 0.128337708 | -5.2380693  | ns |
| FES         | 0.01968951  | 0.018532069 | 1.927053999 | 0.053991713 | 0.129226066 | -5.23795637 | ns |
| FGF9        | 0.01545588  | -0.02044946 | 1.923732545 | 0.054407036 | 0.130113467 | -5.24068001 | ns |
| CLEC4A      | 0.014469253 | 0.005587358 | 1.922954645 | 0.054504232 | 0.130239246 | -5.25529017 | ns |
| THSD1       | 0.013057738 | 0.00957023  | 1.922458368 | 0.054567157 | 0.130282992 | -5.24146503 | ns |
| ACTA2       | -0.01753906 | 0.001956434 | -1.92197965 | 0.054627156 | 0.130319686 | -5.24830486 | ns |
| RBM25       | -0.01803086 | 0.017726948 | -1.92054103 | 0.054808503 | 0.130611805 | -5.24827464 | ns |
| CTRB1       | 0.022174696 | 0.01138384  | 1.920295522 | 0.054839066 | 0.130611805 | -5.26064019 | ns |
| IL7         | -0.02672082 | 0.010567027 | -1.91917833 | 0.054980296 | 0.130822807 | -5.26249422 | ns |
| LEG1        | 0.026101686 | 0.056077238 | 1.918860485 | 0.055021395 | 0.130822807 | -5.23818457 | ns |
| PROCR       | 0.013609145 | 0.035921165 | 1.918535489 | 0.055062065 | 0.130822807 | -5.25328308 | ns |
| IL1A        | -0.02329673 | 0.074834604 | -1.91786927 | 0.055146422 | 0.13091671  | -5.25591642 | ns |
| ZBP1        | -0.01538445 | 0.042093612 | -1.91668988 | 0.055296277 | 0.131120034 | -5.25646072 | ns |
| SIRT1       | -0.03433306 | 0.197516286 | -1.91648854 | 0.055321877 | 0.131120034 | -5.25684385 | ns |
| GSTM4       | 0.027873243 | 0.149705727 | 1.915805754 | 0.055408773 | 0.131219479 | -5.25847923 | ns |
| SBSN        | -0.01292133 | 0.002892931 | -1.91026867 | 0.05611712  | 0.132789296 | -5.28196204 | ns |
| SIRPA       | -0.02353454 | -0.09106742 | -1.90934577 | 0.056236142 | 0.132963187 | -5.28024751 | ns |
| SYTL4       | -0.02769015 | 0.093125142 | -1.90464081 | 0.056845284 | 0.134294684 | -5.29416328 | ns |
| CXCL11      | -0.03175989 | 0.023056925 | -1.90237497 | 0.057140658 | 0.134843354 | -5.29936255 | ns |
| C1QTNF1     | -0.01729565 | -0.00940625 | -1.90215272 | 0.057169888 | 0.134843354 | -5.29433886 | ns |
| TXNRD1      | -0.01935201 | 0.014519003 | -1.89961271 | 0.057502665 | 0.135518791 | -5.29986865 | ns |
| PTGES2      | -0.02061965 | 0.00635611  | -1.89923319 | 0.057553119 | 0.135528312 | -5.28578962 | ns |
| CTRC        | 0.025290901 | 0.04297903  | 1.894668279 | 0.058155169 | 0.136832617 | -5.30713467 | ns |
| I3HYPDH     | -0.03384927 | 0.011406265 | -1.89432329 | 0.058200723 | 0.136832617 | -5.31362602 | ns |
| MICB_MICA   | -0.06191859 | -0.52832135 | -1.88979462 | 0.058804265 | 0.138041756 | -5.3180657  | ns |
| IFT20       | -0.01706568 | 0.054336889 | -1.88975711 | 0.05880957  | 0.138041756 | -5.3088666  | ns |
| KIAA0319    | 0.011457295 | 0.017264363 | 1.888780617 | 0.058939884 | 0.138225939 | -5.32379559 | ns |
| PPBP        | -0.03197706 | -0.07303779 | -1.88846245 | 0.058982713 | 0.138225939 | -5.31979923 | ns |
| ALDH3A1     | -0.02568666 | 0.035957889 | -1.88715755 | 0.05915803  | 0.138450481 | -5.32208283 | ns |
| PCNA        | -0.02496192 | 0.143699095 | -1.88685656 | 0.059198886 | 0.138450481 | -5.31194281 | ns |
| DLGAP5      | 0.019927081 | 0.113455707 | 1.886288153 | 0.059274784 | 0.138450481 | -5.3294767  | ns |
| BDNF        | -0.03121055 | -0.09279052 | -1.8862839  | 0.059275406 | 0.138450481 | -5.3283224  | ns |

|            |             |             |             |             |             |             |    |
|------------|-------------|-------------|-------------|-------------|-------------|-------------|----|
| KAZALD1    | 0.018344095 | -0.03563132 | 1.885987247 | 0.0593156   | 0.138450481 | -5.32275444 | ns |
| COL4A4     | 0.01989538  | -0.0504766  | 1.884585373 | 0.059504845 | 0.138781269 | -5.32374994 | ns |
| SMTN       | -0.03725645 | 0.163001878 | -1.88381268 | 0.059609055 | 0.138913361 | -5.33240483 | ns |
| PDCD1      | -0.01657007 | 0.010834746 | -1.88065208 | 0.060038    | 0.139801403 | -5.33992952 | ns |
| BLMH       | -0.01266888 | -0.00352135 | -1.87963589 | 0.060176447 | 0.140012133 | -5.34172684 | ns |
| C7orf50    | -0.00908983 | 0.021179467 | -1.87859437 | 0.060318653 | 0.140231262 | -5.34285093 | ns |
| PM20D1     | -0.07658348 | -0.5239588  | -1.87807807 | 0.060389584 | 0.140284475 | -5.33536049 | ns |
| CASP10     | -0.02935224 | -0.00639692 | -1.87474886 | 0.06084661  | 0.141233785 | -5.33691419 | ns |
| TTR        | -0.00912667 | -0.00211707 | -1.87191865 | 0.061236907 | 0.142026821 | -5.34922115 | ns |
| UBXN1      | -0.02605374 | 0.028770496 | -1.86584067 | 0.062082976 | 0.143874834 | -5.35399704 | ns |
| VWC2L      | 0.017670479 | 0.087433601 | 1.860821087 | 0.062788339 | 0.145339399 | -5.37686228 | ns |
| CRISP2     | 0.023076066 | -0.04755949 | 1.860602331 | 0.062819254 | 0.145339399 | -5.37806079 | ns |
| LTA4H      | -0.02324858 | 0.041349871 | -1.86028393 | 0.062864267 | 0.145339399 | -5.37864909 | ns |
| NGRN       | -0.0083021  | 0.010941475 | -1.85773037 | 0.063226262 | 0.146060669 | -5.38155953 | ns |
| TBCA       | -0.03204086 | 0.01215821  | -1.85702843 | 0.063326509 | 0.146176606 | -5.37028443 | ns |
| GFER       | -0.02610016 | 0.021887839 | -1.85499506 | 0.063616485 | 0.146555487 | -5.3732552  | ns |
| BACH1      | -0.02890246 | 0.030804346 | -1.85491227 | 0.063627924 | 0.146555487 | -5.38292385 | ns |
| GADD45B    | 0.018602607 | 0.073312096 | 1.854819875 | 0.063641218 | 0.146555487 | -5.3796718  | ns |
| CYTL1      | -0.00853618 | -0.0130558  | -1.85398747 | 0.063759957 | 0.146713219 | -5.38830451 | ns |
| IL12RB1    | -0.01457761 | -0.02995799 | -1.85354056 | 0.063824401 | 0.146745868 | -5.37636208 | ns |
| JUN        | -0.02092532 | 0.052226357 | -1.8525512  | 0.063966205 | 0.146956191 | -5.37818245 | ns |
| PLXNB2     | -0.00916539 | -0.01441118 | -1.85202167 | 0.064041813 | 0.147014224 | -5.38989008 | ns |
| POSTN      | 0.013636531 | 0.005027423 | 1.850411752 | 0.064273263 | 0.147429638 | -5.39488179 | ns |
| CEBPA      | -0.01438226 | 0.048671643 | -1.84778656 | 0.064652854 | 0.148183936 | -5.38523132 | ns |
| MATN3      | -0.01250254 | 0.008724201 | -1.84719708 | 0.064737951 | 0.148262602 | -5.39308472 | ns |
| CDC27      | -0.02422438 | 0.075676815 | -1.84286959 | 0.065367717 | 0.149587565 | -5.3955156  | ns |
| YJU2       | -0.01217846 | 0.015210591 | -1.84246601 | 0.065426162 | 0.149604066 | -5.40886156 | ns |
| ATP1B4     | 0.015638954 | 0.04827829  | 1.841789164 | 0.065525694 | 0.149714419 | -5.39536511 | ns |
| DHODH      | -0.01758587 | 0.04496766  | -1.83895741 | 0.065941163 | 0.150545892 | -5.40172825 | ns |
| EBI3_IL27  | 0.011957749 | 0.003729888 | 1.836636039 | 0.066282782 | 0.151207596 | -5.42124285 | ns |
| NIT1       | -0.01771373 | -0.06819289 | -1.83550955 | 0.066449908 | 0.151436561 | -5.4089296  | ns |
| PRDX2      | -0.02364367 | 0.061656396 | -1.83525881 | 0.066486874 | 0.151436561 | -5.41395758 | ns |
| EPHB4      | -0.00894835 | -0.01053221 | -1.83424272 | 0.066637117 | 0.151660469 | -5.42543922 | ns |
| DNAJB14    | -0.0238879  | 0.022745037 | -1.83230258 | 0.066925574 | 0.152198345 | -5.42707574 | ns |
| CEP43      | -0.02683418 | 0.019300825 | -1.83143161 | 0.067056006 | 0.152376294 | -5.41433314 | ns |
| SH3GLB2    | -0.02518495 | -0.01082004 | -1.82806987 | 0.067558276 | 0.153281677 | -5.43584432 | ns |
| CEACAM21   | -0.03382858 | 0.246080803 | -1.82806353 | 0.067559424 | 0.153281677 | -5.43202221 | ns |
| STX4       | -0.02452232 | 0.071075477 | -1.82671849 | 0.067761583 | 0.153559302 | -5.43201007 | ns |
| ATP2B4     | -0.02300902 | 0.152626899 | -1.82655208 | 0.067786966 | 0.153559302 | -5.42430296 | ns |
| AP1G2      | -0.02981027 | 0.03947534  | -1.82546123 | 0.067950752 | 0.153811005 | -5.43983262 | ns |
| MRI1       | -0.02503665 | -0.07440542 | -1.82384134 | 0.068195798 | 0.154246111 | -5.43039249 | ns |
| ARHGAP5    | -0.02768236 | 0.160408679 | -1.82205398 | 0.068466668 | 0.154738908 | -5.43126145 | ns |
| SERPINH1   | -0.04721853 | -0.02301683 | -1.82022107 | 0.068744915 | 0.155247604 | -5.44280338 | ns |
| SELP       | -0.02234414 | -0.00719233 | -1.81937082 | 0.068874344 | 0.155419693 | -5.44730508 | ns |
| DDR1       | 0.008508879 | -0.00572732 | 1.816888363 | 0.069253503 | 0.156154618 | -5.45724294 | ns |
| MLN        | -0.03505622 | -0.0711332  | -1.81333784 | 0.069799259 | 0.157263763 | -5.45864727 | ns |
| RALY       | -0.01789211 | 0.029304294 | -1.81065183 | 0.070214179 | 0.158076641 | -5.46657133 | ns |
| CEACAM5    | 0.02471971  | -0.01066302 | 1.810019027 | 0.070313036 | 0.158177245 | -5.44918218 | ns |
| ILKAP      | -0.02262607 | 0.019983732 | -1.80942708 | 0.070404635 | 0.158261381 | -5.45570424 | ns |
| BMP6       | -0.01604996 | -0.01019986 | -1.80624249 | 0.070900453 | 0.159253325 | -5.46177151 | ns |
| AMBN       | 0.01042635  | 0.017408876 | 1.80225754  | 0.071524821 | 0.160532266 | -5.46943955 | ns |
| SLC9A3R1   | -0.0307017  | 0.006415534 | -1.80025412 | 0.071840412 | 0.161116745 | -5.47337084 | ns |
| SFTP2      | -0.01925294 | 0.029464584 | -1.79906728 | 0.072028075 | 0.161413645 | -5.47471394 | ns |
| BHMT2      | 0.009298988 | -0.01491583 | 1.797929042 | 0.072208312 | 0.161693458 | -5.47580723 | ns |
| DNAJC21    | -0.01412455 | 0.045629235 | -1.79738816 | 0.072293476 | 0.161760115 | -5.49107923 | ns |
| LAP3       | -0.01881581 | -0.01718026 | -1.7969207  | 0.072368178 | 0.161803277 | -5.47897584 | ns |
| SSNA1      | -0.01850966 | 0.035008125 | -1.79634482 | 0.072459206 | 0.161882846 | -5.49186479 | ns |
| TXNDC5     | -0.0264032  | 0.024704223 | -1.79595299 | 0.072521453 | 0.161898046 | -5.49480146 | ns |
| RABEP1     | -0.028363   | 0.025085284 | -1.79510973 | 0.072656149 | 0.162074832 | -5.48255356 | ns |
| CD200      | 0.010111251 | 0.016014069 | 1.794286323 | 0.072787158 | 0.162243131 | -5.49277433 | ns |
| CKMT1A_CKM | 0.026286798 | -0.0308338  | 1.792622935 | 0.073053032 | 0.162711559 | -5.49172749 | ns |
| DENND2B    | 0.01793027  | 0.084360074 | 1.791504309 | 0.073232512 | 0.162986993 | -5.48725615 | ns |
| IFNGR1     | -0.0076622  | -0.00138398 | -1.78849214 | 0.073716274 | 0.163938706 | -5.50439484 | ns |
| CEP170     | -0.02817094 | 0.081483561 | -1.78784497 | 0.073821098 | 0.164046884 | -5.49467172 | ns |
| TOP1       | -0.04047359 | -0.06258099 | -1.78710093 | 0.073940757 | 0.164187842 | -5.50831313 | ns |
| FLT3       | 0.011982289 | 0.013453869 | 1.785321909 | 0.074229259 | 0.164703219 | -5.49917421 | ns |

|           |             |             |             |             |             |             |    |
|-----------|-------------|-------------|-------------|-------------|-------------|-------------|----|
| C2orf69   | -0.02047225 | 0.071056661 | -1.7802466  | 0.075055693 | 0.166410497 | -5.50839702 | ns |
| CD34      | 0.009110954 | 0.007987352 | 1.77904374  | 0.07525222  | 0.166719637 | -5.52360288 | ns |
| TNFAIP8   | -0.0136016  | 0.006146925 | -1.77822202 | 0.075387506 | 0.166892735 | -5.51216508 | ns |
| TIMM10    | -0.01420099 | 0.043848896 | -1.7765836  | 0.0756564   | 0.167237957 | -5.5282441  | ns |
| FLI1      | -0.04230158 | 0.050508276 | -1.7765071  | 0.07566958  | 0.167237957 | -5.51476172 | ns |
| CLTA      | -0.0174614  | 0.04076626  | -1.77622955 | 0.075715267 | 0.167237957 | -5.51590601 | ns |
| CCL13     | -0.02638501 | -0.01076245 | -1.77562991 | 0.075813551 | 0.167328472 | -5.53033887 | ns |
| CLSPN     | -0.01371846 | 0.036394742 | -1.77453279 | 0.075995297 | 0.167602922 | -5.51722867 | ns |
| PALM3     | -0.02703267 | 0.152686517 | -1.77361177 | 0.076147631 | 0.167812137 | -5.51892486 | ns |
| GUK1      | 0.015159353 | 0.021779593 | 1.772713476 | 0.076296445 | 0.168013287 | -5.52050641 | ns |
| FKBPL     | -0.02107382 | 0.027985797 | -1.77047649 | 0.076667496 | 0.168608099 | -5.53768079 | ns |
| ADA       | -0.01330781 | 0.013489919 | -1.7703886  | 0.07668204  | 0.168608099 | -5.54027301 | ns |
| RAB44     | -0.01554296 | 0.038410105 | -1.76688105 | 0.077267891 | 0.169768429 | -5.54432784 | ns |
| VAMP8     | -0.03126317 | 0.008701051 | -1.76152524 | 0.078169866 | 0.171621059 | -5.53979975 | ns |
| PDGFA     | -0.02724543 | -0.04660387 | -1.76073183 | 0.078303506 | 0.171785303 | -5.55666679 | ns |
| WWP2      | -0.02075385 | 0.033169945 | -1.76011534 | 0.07840827  | 0.171879496 | -5.55008046 | ns |
| PRKAR2A   | -0.02930501 | -0.04797224 | -1.75978423 | 0.078464167 | 0.171879496 | -5.55666606 | ns |
| CNTNAP4   | -0.03751238 | 0.363790031 | -1.75799399 | 0.078768769 | 0.172417395 | -5.5474867  | ns |
| TMCO5A    | -0.0193508  | 0.040031296 | -1.75618885 | 0.079076418 | 0.172961154 | -5.55063613 | ns |
| PRG3      | -0.01732049 | 0.011750375 | -1.75554263 | 0.079186307 | 0.17307187  | -5.56475156 | ns |
| GKN1      | 0.010288457 | -0.02270903 | 1.752400301 | 0.079725405 | 0.174119808 | -5.55583053 | ns |
| HRC       | 0.011847789 | 0.043459423 | 1.751503638 | 0.079879525 | 0.174326019 | -5.55852983 | ns |
| GRHPR     | -0.02241101 | -0.00937699 | -1.74687571 | 0.080678721 | 0.175849443 | -5.580222   | ns |
| LAMTOR5   | -0.01451299 | 0.028809154 | -1.7467647  | 0.080698032 | 0.175849443 | -5.57942558 | ns |
| IRAK1     | -0.0264024  | 0.040088056 | -1.74604212 | 0.08082396  | 0.175886156 | -5.56847031 | ns |
| PPP3R1    | -0.01579282 | -0.02268153 | -1.74597532 | 0.08083535  | 0.175886156 | -5.57469592 | ns |
| APP       | -0.02483951 | 0.003109772 | -1.74322884 | 0.081313646 | 0.17679512  | -5.58273426 | ns |
| OTOA      | -0.01851697 | 0.09108119  | -1.74195176 | 0.081537277 | 0.177105414 | -5.57601272 | ns |
| CCN2      | -0.02192992 | -0.01454191 | -1.74171921 | 0.081577665 | 0.177105414 | -5.58341837 | ns |
| MANSC1    | -0.009791   | -0.00295025 | -1.73703115 | 0.08240162  | 0.178761315 | -5.5950902  | ns |
| NID2      | -0.02797097 | 0.02735187  | -1.73506876 | 0.082748672 | 0.179380937 | -5.59682772 | ns |
| HMOX1     | 0.01731571  | 0.017567842 | 1.733081285 | 0.083101626 | 0.180012425 | -5.59170097 | ns |
| MMP1      | -0.0346289  | -0.08202117 | -1.73210237 | 0.08327629  | 0.180257054 | -5.57903363 | ns |
| GPI       | -0.01633981 | 0.021123681 | -1.73121168 | 0.083433942 | 0.180464527 | -5.60613365 | ns |
| ANGPTL7   | 0.013259083 | -0.01204065 | 1.730000393 | 0.083650085 | 0.180798111 | -5.61092387 | ns |
| ITPR1     | -0.02433378 | 0.061217129 | -1.72766021 | 0.084069638 | 0.18139428  | -5.59971479 | ns |
| PPP1R12A  | -0.03581793 | 0.033457035 | -1.72728138 | 0.084137145 | 0.18139428  | -5.61186197 | ns |
| LY6D      | -0.01308328 | -0.01867656 | -1.72709421 | 0.084171    | 0.18139428  | -5.60613422 | ns |
| SPINT1    | -0.00884004 | -0.01325497 | -1.72705596 | 0.084177804 | 0.18139428  | -5.6085126  | ns |
| LYVE1     | 0.006660864 | 0.000175936 | 1.726727636 | 0.084236522 | 0.18139428  | -5.61477702 | ns |
| SPRY2     | -0.03454799 | 0.051050357 | -1.72485438 | 0.084574173 | 0.181987167 | -5.6049814  | ns |
| TMPRSS11D | -0.01254801 | 0.003513503 | -1.72396927 | 0.084733352 | 0.182195426 | -5.61896281 | ns |
| F12       | -0.01442359 | -0.05682967 | -1.72205984 | 0.085078636 | 0.182771334 | -5.62276409 | ns |
| CD70      | -0.01602961 | -0.03548506 | -1.72179743 | 0.085126375 | 0.182771334 | -5.61933054 | ns |
| ASS1      | -0.02698938 | 0.017910722 | -1.7187464  | 0.085681148 | 0.183827297 | -5.61405224 | ns |
| VSIG10L   | 0.011228557 | 0.011452428 | 1.718186294 | 0.085783233 | 0.183840099 | -5.61500797 | ns |
| HS1BP3    | -0.03124396 | -0.01056884 | -1.71785913 | 0.085842845 | 0.183840099 | -5.61648063 | ns |
| S100G     | 0.015744676 | 0.06627761  | 1.717674254 | 0.085875992 | 0.183840099 | -5.63122982 | ns |
| ALDH2     | -0.01813495 | 0.109272298 | -1.71725151 | 0.085953269 | 0.183870729 | -5.63019131 | ns |
| ITGB2     | 0.01049797  | 0.001628109 | 1.714260341 | 0.086501358 | 0.184907733 | -5.62565098 | ns |
| CLEC12A   | -0.00665934 | -0.00314861 | -1.71320258 | 0.086695892 | 0.185188006 | -5.62315998 | ns |
| CAMSAP1   | -0.03792293 | 0.043670477 | -1.71249608 | 0.086825257 | 0.185328764 | -5.64005003 | ns |
| AARSD1    | -0.02104514 | 0.006943245 | -1.7107454  | 0.087148396 | 0.185882626 | -5.63570758 | ns |
| MARCO     | -0.0097789  | -0.03160433 | -1.71032808 | 0.087225484 | 0.18591125  | -5.63670165 | ns |
| HS6ST2    | -0.01097404 | 0.026341478 | -1.70920141 | 0.087434284 | 0.186220357 | -5.62995841 | ns |
| DGCR6     | -0.01501928 | 0.039580816 | -1.70583503 | 0.088059395 | 0.187415038 | -5.63783587 | ns |
| CHCHD6    | -0.00952523 | 0.005997195 | -1.70475716 | 0.088259829 | 0.187704807 | -5.65142234 | ns |
| CEP290    | -0.01844012 | 0.057710574 | -1.70275426 | 0.088634421 | 0.188364272 | -5.64827694 | ns |
| NTproBNP  | 0.034974291 | 0.013750353 | 1.702268919 | 0.088725271 | 0.188416611 | -5.65035753 | ns |
| EIF5A     | -0.01106311 | 0.008168778 | -1.70193515 | 0.088788102 | 0.188416611 | -5.64397452 | ns |
| IQGAP2    | -0.02003511 | 0.000275428 | -1.70025233 | 0.089103799 | 0.188949232 | -5.6534792  | ns |
| FOXO3     | -0.03546007 | 0.111166139 | -1.69865627 | 0.089404648 | 0.189449617 | -5.64907955 | ns |
| PDRG1     | -0.01823094 | 0.06402353  | -1.69731622 | 0.089657478 | 0.189847597 | -5.65157805 | ns |
| CTF1      | -0.03083671 | 0.019650402 | -1.69544571 | 0.090011564 | 0.190459251 | -5.6551457  | ns |
| PRSS2     | 0.018510318 | 0.007863912 | 1.694354325 | 0.090218256 | 0.190758368 | -5.66541988 | ns |
| STX5      | -0.01392281 | 0.040134448 | -1.69364799 | 0.090352907 | 0.190861247 | -5.65623443 | ns |

|          |             |             |             |             |             |             |    |
|----------|-------------|-------------|-------------|-------------|-------------|-------------|----|
| TXNDC9   | -0.01796619 | 0.074873574 | -1.69340951 | 0.090397639 | 0.190861247 | -5.67131732 | ns |
| TG       | -0.03756185 | 0.198544512 | -1.69211767 | 0.090643704 | 0.191242498 | -5.67274232 | ns |
| IL4R     | -0.01259609 | -0.01938261 | -1.69069824 | 0.09091476  | 0.191675884 | -5.6720267  | ns |
| MIF      | -0.0251065  | -0.04617923 | -1.68816568 | 0.091399766 | 0.192470429 | -5.67552317 | ns |
| ANPEP    | -0.01008618 | 0.002068346 | -1.68804233 | 0.091423454 | 0.192470429 | -5.67511331 | ns |
| OTUD7B   | -0.0216597  | 0.023676332 | -1.68658901 | 0.091702501 | 0.192815508 | -5.68377897 | ns |
| STX3     | -0.01307111 | 0.064155683 | -1.68650118 | 0.091719432 | 0.192815508 | -5.68291208 | ns |
| ANGPT2   | -0.01377966 | -0.00772069 | -1.6846864  | 0.092069197 | 0.19341155  | -5.68776179 | ns |
| VEGFC    | -0.0199902  | -0.02186157 | -1.68354984 | 0.09228892  | 0.193733749 | -5.68592899 | ns |
| ABO      | -0.04866049 | -0.17263805 | -1.68317936 | 0.092360541 | 0.193744813 | -5.68757087 | ns |
| MEP1B    | -0.04313542 | -0.20000856 | -1.68142191 | 0.092701391 | 0.194320216 | -5.68538271 | ns |
| DSCAM    | -0.01169299 | 0.00866266  | -1.68052809 | 0.092874733 | 0.194543917 | -5.69391309 | ns |
| CPLX2    | 0.010294193 | 0.002855245 | 1.678598488 | 0.093251119 | 0.195192306 | -5.68057546 | ns |
| ATP1B1   | 0.016580018 | 0.0610765   | 1.677849031 | 0.093397363 | 0.19535838  | -5.68301784 | ns |
| IFNAR1   | -0.00862931 | 0.02396281  | -1.67628012 | 0.093703552 | 0.195858533 | -5.69890047 | ns |
| GGCT     | -0.01638396 | 0.019026555 | -1.67176114 | 0.09459167  | 0.197573445 | -5.70692752 | ns |
| ADAMTS4  | -0.01178931 | -0.01515381 | -1.66961731 | 0.09501592  | 0.198157396 | -5.69635988 | ns |
| PMCH     | 0.027495902 | 0.231961657 | 1.669344647 | 0.095069919 | 0.198157396 | -5.69715035 | ns |
| RLN2     | -0.04148216 | 0.209122159 | -1.66931926 | 0.095074833 | 0.198157396 | -5.69814045 | ns |
| SNX2     | -0.02768518 | 0.062905844 | -1.66818287 | 0.095299695 | 0.198484385 | -5.71268043 | ns |
| BCAM     | 0.008449285 | 0.002000712 | 1.663814321 | 0.096169928 | 0.200154091 | -5.71708419 | ns |
| KLK3     | -0.02860724 | 0.561798654 | -1.66058154 | 0.096817767 | 0.201236842 | -5.72583829 | ns |
| RWDD1    | -0.02301946 | -0.00280278 | -1.66053047 | 0.096828001 | 0.201236842 | -5.72724193 | ns |
| PRDX1    | 0.030589356 | 0.10592598  | 1.659534892 | 0.09702903  | 0.201445152 | -5.71138467 | ns |
| CNST     | -0.03855916 | -0.05921551 | -1.65934782 | 0.097066209 | 0.201445152 | -5.72199926 | ns |
| MYDGF    | -0.03352915 | -0.03194386 | -1.65718164 | 0.097503012 | 0.202008829 | -5.73183764 | ns |
| CPA1     | 0.020866967 | 0.018610704 | 1.657143972 | 0.097510594 | 0.202008829 | -5.73247996 | ns |
| IFNGR2   | -0.01855496 | 0.106773127 | -1.65697358 | 0.097545359 | 0.202008829 | -5.72507717 | ns |
| VSIR     | -0.02180015 | 0.061948223 | -1.65217462 | 0.098519468 | 0.203881535 | -5.73379405 | ns |
| RAB6B    | 0.016538897 | 0.037101954 | 1.651246227 | 0.098709146 | 0.203887779 | -5.72816765 | ns |
| IGBP1    | -0.0204798  | 0.021935775 | -1.65065998 | 0.098828254 | 0.203887779 | -5.74332124 | ns |
| CAMKK1   | -0.0160126  | 0.027057884 | -1.65037828 | 0.098886468 | 0.203887779 | -5.72935268 | ns |
| ACTN2    | -0.01965329 | 0.079728462 | -1.65024386 | 0.09891396  | 0.203887779 | -5.72863019 | ns |
| SAA4     | -0.01079378 | 0.03625041  | -1.64969766 | 0.099025059 | 0.203887779 | -5.74392199 | ns |
| NUDT16   | -0.02899295 | 0.000502154 | -1.6494772  | 0.099070263 | 0.203887779 | -5.74249388 | ns |
| DHRS4L2  | 0.015839831 | 0.068242472 | 1.649430273 | 0.09907978  | 0.203887779 | -5.74432158 | ns |
| NAGA     | -0.01972835 | 0.083597461 | -1.64942718 | 0.099081082 | 0.203887779 | -5.72861174 | ns |
| CCAR2    | -0.01811789 | 0.095377742 | -1.64815654 | 0.099340819 | 0.204278305 | -5.74640733 | ns |
| CALB1    | 0.01498943  | -0.01608964 | 1.647472221 | 0.099481559 | 0.204423752 | -5.74121279 | ns |
| LHB      | 0.031015014 | 0.17978426  | 1.645884441 | 0.099808445 | 0.204949094 | -5.73670702 | ns |
| SF3B4    | -0.02677874 | 0.043033013 | -1.64554706 | 0.099877589 | 0.204949094 | -5.7443606  | ns |
| BRK1     | -0.0155189  | -0.01238464 | -1.64446113 | 0.100101847 | 0.205265024 | -5.73926988 | ns |
| GYS1     | -0.03275281 | 0.009472521 | -1.64278803 | 0.100447666 | 0.205731599 | -5.74241964 | ns |
| SNAP29   | -0.03204681 | -0.03306719 | -1.64267629 | 0.100470295 | 0.205731599 | -5.75343898 | ns |
| TIMP4    | -0.01355902 | -0.00530411 | -1.6408044  | 0.100858488 | 0.206381769 | -5.75484153 | ns |
| AZI2     | -0.01858677 | 0.067031324 | -1.63882062 | 0.101270889 | 0.20708053  | -5.76266092 | ns |
| CSNK2A1  | 0.014797605 | 0.038722309 | 1.636292178 | 0.101798725 | 0.208014189 | -5.76677311 | ns |
| ABRAXAS2 | -0.0218314  | 0.023782127 | -1.63238721 | 0.102618886 | 0.209428306 | -5.75773206 | ns |
| SPRR1B   | -0.02812133 | 0.165800298 | -1.63231288 | 0.102634214 | 0.209428306 | -5.76492375 | ns |
| TMOD4    | 0.013297294 | -0.0037945  | 1.631908054 | 0.102719816 | 0.209456608 | -5.7573138  | ns |
| FLT3LG   | 0.011564526 | -0.01131521 | 1.62865404  | 0.103406558 | 0.210612954 | -5.77950695 | ns |
| ARID4B   | -0.01472235 | 0.039316032 | -1.62854087 | 0.103431156 | 0.210612954 | -5.76514028 | ns |
| GPC1     | -0.0099652  | -0.00822718 | -1.61970146 | 0.105316739 | 0.214253506 | -5.7943972  | ns |
| ANXA10   | -0.02698713 | 0.044104346 | -1.61944278 | 0.105372955 | 0.214253506 | -5.77981169 | ns |
| MAN2B2   | -0.01928888 | -0.06338169 | -1.6191324  | 0.10543914  | 0.214253506 | -5.79374196 | ns |
| DNAJB1   | -0.03093581 | -0.03943587 | -1.6179875  | 0.105685908 | 0.214571211 | -5.78901975 | ns |
| GAGE2A   | -0.02057687 | 0.102086336 | -1.61761949 | 0.105765619 | 0.214571211 | -5.78036543 | ns |
| GAS2     | -0.01727232 | 0.061635028 | -1.61738463 | 0.10581594  | 0.214571211 | -5.7890115  | ns |
| ARG1     | -0.01850514 | 0.014040779 | -1.6164213  | 0.106023865 | 0.214843641 | -5.79253699 | ns |
| OGT      | -0.02101639 | 0.108604218 | -1.61380486 | 0.106590427 | 0.215841918 | -5.79475482 | ns |
| GH2      | -0.05735596 | 0.507137291 | -1.61306741 | 0.10675084  | 0.215984366 | -5.78980561 | ns |
| B4GAT1   | 0.008621546 | 0.014502876 | 1.612610688 | 0.106849647 | 0.215984366 | -5.80038844 | ns |
| XPNPEP2  | 0.033951879 | -0.08891704 | 1.612414648 | 0.106892182 | 0.215984366 | -5.80235295 | ns |
| KLK8     | -0.01212281 | -0.02051705 | -1.61212154 | 0.106956642 | 0.215984366 | -5.78695961 | ns |
| LAT      | -0.02673063 | -0.11615883 | -1.61144791 | 0.10710245  | 0.216129339 | -5.80719165 | ns |
| MTSS1    | -0.03642612 | -0.00883268 | -1.60955779 | 0.107514842 | 0.216811698 | -5.807768   | ns |

|          |             |             |             |             |             |             |    |
|----------|-------------|-------------|-------------|-------------|-------------|-------------|----|
| COL5A1   | 0.012324383 | 0.026862329 | 1.608840579 | 0.107672048 | 0.216978868 | -5.79734859 | ns |
| PPP1R9B  | -0.03338145 | 0.021549955 | -1.60791113 | 0.10787497  | 0.21723787  | -5.81284592 | ns |
| KLK1     | 0.043975855 | 0.43172829  | 1.604953211 | 0.108524812 | 0.2183959   | -5.80901765 | ns |
| TLR1     | 0.008360945 | 0.003647543 | 1.602613522 | 0.109041013 | 0.219283579 | -5.80521291 | ns |
| CCNE1    | -0.03094413 | 0.258550342 | -1.60224477 | 0.1091225   | 0.219296422 | -5.80579964 | ns |
| NME1     | 0.006838928 | 0.006782124 | 1.601264201 | 0.109339423 | 0.219541534 | -5.80735921 | ns |
| SLIT2    | -0.01792657 | -0.00611232 | -1.60101374 | 0.109394839 | 0.219541534 | -5.80927825 | ns |
| MTSS2    | -0.03204546 | -0.01262639 | -1.60031123 | 0.109550002 | 0.219701927 | -5.82283937 | ns |
| TBCC     | -0.02831107 | -0.01503337 | -1.59853923 | 0.109943711 | 0.220340175 | -5.81953424 | ns |
| GBP4     | 0.016713581 | 0.037923251 | 1.59732118  | 0.110215101 | 0.220732575 | -5.81514181 | ns |
| MPHOSPH8 | -0.02523594 | 0.034927246 | -1.59518205 | 0.110692507 | 0.221536751 | -5.81895202 | ns |
| CXCL6    | -0.02624601 | -0.01521787 | -1.59090965 | 0.111650261 | 0.223150967 | -5.83985293 | ns |
| LTB      | -0.01094699 | 0.01994736  | -1.59090283 | 0.111651905 | 0.223150967 | -5.83774874 | ns |
| RANBP2   | 0.010580816 | 0.007332881 | 1.58980094  | 0.111900647 | 0.223495137 | -5.82769627 | ns |
| CTBS     | -0.00863005 | -0.02082867 | -1.58872928 | 0.11214226  | 0.223824607 | -5.83357125 | ns |
| OMG      | 0.023035587 | 0.052601493 | 1.586559377 | 0.112633141 | 0.224650801 | -5.83902754 | ns |
| PCDH12   | 0.007856539 | 0.000365436 | 1.586096335 | 0.112737826 | 0.224706111 | -5.84709655 | ns |
| SCN3B    | -0.0154372  | 0.065220673 | -1.5857272  | 0.112822176 | 0.224720841 | -5.83411906 | ns |
| GBP6     | -0.0138807  | 0.046211873 | -1.58518054 | 0.112946354 | 0.224814829 | -5.83314275 | ns |
| DSG3     | -0.0113889  | -0.00361557 | -1.58432814 | 0.113139532 | 0.225045935 | -5.84841803 | ns |
| CORO1A   | -0.03037264 | 0.098387256 | -1.583467   | 0.113336198 | 0.225283661 | -5.83306363 | ns |
| DRAXIN   | -0.01438611 | 0.000665371 | -1.58247648 | 0.113561547 | 0.225578039 | -5.84490515 | ns |
| AHNAK2   | -0.00929848 | 0.007986883 | -1.58151123 | 0.113782167 | 0.225820093 | -5.83982921 | ns |
| VPS37A   | -0.02748295 | 0.032096605 | -1.58126525 | 0.113838075 | 0.225820093 | -5.84735495 | ns |
| PFKFB2   | -0.02641953 | 0.001772355 | -1.58037278 | 0.114042229 | 0.226071493 | -5.84812125 | ns |
| OXCT1    | -0.02176704 | 0.010908425 | -1.57980838 | 0.114171732 | 0.226174665 | -5.84250195 | ns |
| GZMB     | -0.02155748 | 0.032553069 | -1.57823901 | 0.114531325 | 0.226733199 | -5.85457018 | ns |
| SERPINB1 | -0.03084118 | 0.019040598 | -1.57681055 | 0.114859809 | 0.227229432 | -5.85494016 | ns |
| THTPA    | -0.02784619 | 0.001931599 | -1.57550306 | 0.115160882 | 0.227670802 | -5.86106505 | ns |
| ACE      | 0.008222381 | -0.01228102 | 1.574888956 | 0.115302515 | 0.227796578 | -5.86277062 | ns |
| ING1     | -0.01567281 | 0.014180341 | -1.57115921 | 0.116166718 | 0.229348761 | -5.85504101 | ns |
| SERPINE2 | -0.02011892 | 0.019631934 | -1.56761484 | 0.116991476 | 0.230442611 | -5.87526802 | ns |
| PODXL    | 0.005090929 | -0.00496073 | 1.567491289 | 0.117020583 | 0.230442611 | -5.86889036 | ns |
| SIRT5    | 0.01874053  | 0.092522442 | 1.567443946 | 0.117031957 | 0.230442611 | -5.86208727 | ns |
| IMPG1    | -0.00993873 | 0.031766187 | -1.56742471 | 0.117036436 | 0.230442611 | -5.86277215 | ns |
| LMNB1    | -0.01864214 | -0.01662526 | -1.56547159 | 0.117492888 | 0.231185467 | -5.8757782  | ns |
| KIAA1549 | -0.02156983 | -0.01014461 | -1.56276097 | 0.118129554 | 0.232281683 | -5.87526476 | ns |
| PFDN6    | 0.020698495 | 0.110482804 | 1.56187047  | 0.118339442 | 0.232537799 | -5.8707485  | ns |
| SMPD1    | -0.01614624 | -0.01653308 | -1.55867399 | 0.119094061 | 0.233863254 | -5.88787374 | ns |
| HSDL2    | -0.01486032 | 0.00206624  | -1.55755674 | 0.119359348 | 0.234226677 | -5.87716274 | ns |
| TARBP2   | -0.0270247  | 0.019241948 | -1.55716719 | 0.119451796 | 0.234250668 | -5.8780301  | ns |
| TINAGL1  | -0.00734174 | -0.01256524 | -1.55597287 | 0.119735283 | 0.234644533 | -5.88546586 | ns |
| PODXL2   | 0.009012545 | 0.013059613 | 1.555435224 | 0.119862951 | 0.234644533 | -5.89198511 | ns |
| CD28     | -0.01191433 | 0.002871527 | -1.55530824 | 0.119893714 | 0.234644533 | -5.88066454 | ns |
| PGR      | -0.03283723 | 0.317079291 | -1.55348643 | 0.120328016 | 0.235336777 | -5.88219229 | ns |
| RBPMS2   | -0.03262841 | 0.010229808 | -1.55042737 | 0.121059962 | 0.236609832 | -5.88816401 | ns |
| KLRB1    | -0.01214131 | 0.003513487 | -1.54814471 | 0.121607834 | 0.237388143 | -5.9065166  | ns |
| DCLRE1C  | 0.009911384 | 0.012530805 | 1.548093815 | 0.121620775 | 0.237388143 | -5.88963863 | ns |
| TST      | 0.025066538 | 0.043955913 | 1.547594313 | 0.121741053 | 0.237464178 | -5.89160941 | ns |
| INSL4    | -0.01526102 | 0.050455278 | -1.54620868 | 0.12207466  | 0.237955946 | -5.90737456 | ns |
| VCAN     | 0.009909653 | 0.00580492  | 1.544689359 | 0.122441826 | 0.238512429 | -5.91162403 | ns |
| CXCL9    | -0.0218031  | 0.030408137 | -1.5441408  | 0.122574754 | 0.238612187 | -5.90875811 | ns |
| MOCOS2   | -0.0207874  | 0.023097775 | -1.54311216 | 0.122824459 | 0.238938987 | -5.90020913 | ns |
| RASGRF1  | 0.013780642 | 0.009859614 | 1.542704611 | 0.122923525 | 0.238941021 | -5.89790844 | ns |
| CDH15    | -0.01862942 | 0.121763737 | -1.54243175 | 0.122989162 | 0.238941021 | -5.91386189 | ns |
| SLAMF6   | -0.01230889 | -0.01333314 | -1.54007429 | 0.12356328  | 0.239896793 | -5.90407663 | ns |
| SUSD2    | 0.009383434 | 0.000705283 | 1.535805347 | 0.124606713 | 0.241761861 | -5.92046423 | ns |
| CEMIP2   | -0.00963928 | 0.00662168  | -1.53404358 | 0.125039972 | 0.242441379 | -5.91199645 | ns |
| METAP2   | -0.01928659 | -0.05762615 | -1.53263527 | 0.125386155 | 0.242834762 | -5.92987013 | ns |
| ESPL1    | 0.017427238 | 0.103070526 | 1.532544486 | 0.125409185 | 0.242834762 | -5.91342089 | ns |
| FXN      | -0.02405384 | -0.00255013 | -1.53079082 | 0.12584148  | 0.243399106 | -5.93350028 | ns |
| BEX3     | 0.014473066 | 0.045650722 | 1.530688931 | 0.125867346 | 0.243399106 | -5.91624288 | ns |
| SPRING1  | -0.01919723 | 0.102760336 | -1.52807792 | 0.126514246 | 0.244282928 | -5.92020801 | ns |
| USP47    | 0.026793457 | 0.166035214 | 1.527904542 | 0.126557281 | 0.244282928 | -5.92166866 | ns |
| EHBP1    | -0.0233457  | 0.041242695 | -1.52775644 | 0.126593442 | 0.244282928 | -5.93653553 | ns |
| MLLT1    | 0.020930662 | 0.080641185 | 1.527494987 | 0.126659025 | 0.244282928 | -5.92109233 | ns |

|          |             |             |             |             |             |             |    |
|----------|-------------|-------------|-------------|-------------|-------------|-------------|----|
| CA7      | 0.010371081 | 0.021657627 | 1.525882166 | 0.127059927 | 0.244894381 | -5.93182306 | ns |
| PDZD2    | -0.01864279 | 0.09565729  | -1.52455152 | 0.127392034 | 0.245118337 | -5.9267502  | ns |
| MORC3    | 0.008531788 | 0.020092046 | 1.524536452 | 0.12739516  | 0.245118337 | -5.94117181 | ns |
| GATD3    | -0.02357025 | 0.025262772 | -1.52440735 | 0.127427957 | 0.245118337 | -5.92788715 | ns |
| ZBTB16   | -0.02361827 | 0.114089428 | -1.52338649 | 0.127683062 | 0.245447362 | -5.92945866 | ns |
| IKZF2    | -0.03061272 | 0.245988819 | -1.52259848 | 0.12788021  | 0.245664615 | -5.93065037 | ns |
| P4HB     | -0.01277904 | -0.00640458 | -1.52224682 | 0.12796786  | 0.245671369 | -5.93989856 | ns |
| S100A4   | -0.01867199 | -0.02685058 | -1.52140628 | 0.128178398 | 0.245913878 | -5.9439774  | ns |
| CD244    | -0.00880992 | -0.00300112 | -1.51946181 | 0.128666647 | 0.246688516 | -5.95021125 | ns |
| BCAT2    | 0.016907601 | 0.087976137 | 1.519102465 | 0.128757673 | 0.246701053 | -5.93682411 | ns |
| CCN4     | -0.01299426 | 0.020350445 | -1.51778261 | 0.129089579 | 0.2471748   | -5.95319381 | ns |
| ATG16L1  | -0.02620395 | -0.00849424 | -1.51735973 | 0.129196327 | 0.247217087 | -5.95092953 | ns |
| WFDC12   | -0.02084715 | -0.06381056 | -1.5157841  | 0.129594363 | 0.247816333 | -5.95502057 | ns |
| BRD1     | 0.009446918 | 0.026491922 | 1.515314958 | 0.129713364 | 0.24788156  | -5.94778033 | ns |
| RPS10    | 0.012007592 | 0.03458539  | 1.513184475 | 0.13025383  | 0.248751591 | -5.94389402 | ns |
| TSC22D1  | -0.02045317 | 0.051698312 | -1.51233817 | 0.130468213 | 0.248998158 | -5.96058577 | ns |
| USP25    | -0.0222279  | 0.006409947 | -1.51070407 | 0.130884316 | 0.249629133 | -5.96127112 | ns |
| MAPK9    | -0.01382025 | -0.01240264 | -1.50858033 | 0.131426652 | 0.250499885 | -5.96134267 | ns |
| SCARF1   | -0.01352776 | -0.00530759 | -1.50791589 | 0.131596422 | 0.250519908 | -5.96702725 | ns |
| UNC5D    | 0.008070393 | 0.01333901  | 1.50787026  | 0.131608746 | 0.250519908 | -5.95152524 | ns |
| RGCC     | -0.02309411 | -0.03088473 | -1.50751918 | 0.13169798  | 0.250526451 | -5.96781259 | ns |
| ANGPTL1  | 0.009367493 | 0.012677382 | 1.505819651 | 0.132134466 | 0.251193126 | -5.95445559 | ns |
| MYL3     | -0.02170376 | 0.031650908 | -1.50428184 | 0.132529757 | 0.251780671 | -5.95815056 | ns |
| SCT      | 0.013667306 | 0.04387826  | 1.499947841 | 0.1336488   | 0.253741545 | -5.96488223 | ns |
| IL5RA    | 0.01793703  | -0.01403151 | 1.498338548 | 0.134065885 | 0.25436802  | -5.97663501 | ns |
| GALNT7   | 0.006692704 | -0.00772705 | 1.497680302 | 0.134236964 | 0.25452723  | -5.97514243 | ns |
| IST1     | -0.02981898 | -0.02995086 | -1.49725014 | 0.134348747 | 0.254534541 | -5.97705872 | ns |
| TPSG1    | 0.007747901 | 0.01295535  | 1.496996506 | 0.134415158 | 0.254534541 | -5.96774761 | ns |
| TP73     | 0.010290704 | -0.00385965 | 1.495748884 | 0.134739984 | 0.254984286 | -5.97112761 | ns |
| TUBB3    | 0.008475117 | -0.01333607 | 1.49298454  | 0.135462157 | 0.256184908 | -5.9758838  | ns |
| CHRM1    | 0.01118858  | 0.020869204 | 1.492503181 | 0.135588155 | 0.256257225 | -5.97594316 | ns |
| RAB10    | -0.01606651 | 0.033676488 | -1.48935868 | 0.136413305 | 0.257533413 | -5.99406611 | ns |
| UROS     | -0.02064401 | 0.06859401  | -1.48871544 | 0.136583179 | 0.257533413 | -5.98154968 | ns |
| RAPGEF2  | -0.01587907 | 0.06697825  | -1.48859738 | 0.136614077 | 0.257533413 | -5.9876314  | ns |
| CTSL     | -0.00741254 | -0.0219277  | -1.48858917 | 0.136616184 | 0.257533413 | -5.98890965 | ns |
| CIAPIN1  | -0.02027541 | -0.0048109  | -1.48440963 | 0.1377207   | 0.259448028 | -5.99919951 | ns |
| DCN      | 0.006793357 | -0.00308751 | 1.483105007 | 0.138067431 | 0.259933526 | -5.99024672 | ns |
| CCL28    | 0.018233988 | 0.041427269 | 1.476388649 | 0.139860184 | 0.263139007 | -6.00682934 | ns |
| FAM3C    | -0.00887162 | -0.02927723 | -1.47559367 | 0.140073604 | 0.263370846 | -6.00743619 | ns |
| NFKB1    | -0.02217788 | 0.016001264 | -1.47204055 | 0.141030863 | 0.265000076 | -6.00487511 | ns |
| CD99     | -0.0059915  | -0.0158305  | -1.47026469 | 0.141510552 | 0.265730425 | -6.01829784 | ns |
| PTTG1    | -0.01212393 | 0.007710266 | -1.46899303 | 0.141855284 | 0.266206573 | -6.01642181 | ns |
| AMPD3    | -0.02160236 | 0.047963447 | -1.46846568 | 0.141998065 | 0.266303372 | -6.02451002 | ns |
| MTIF3    | -0.02554061 | -0.00924784 | -1.46778956 | 0.142181732 | 0.266476674 | -6.0244115  | ns |
| CDC42BPB | -0.03086455 | 0.060279564 | -1.46678285 | 0.142455473 | 0.266801996 | -6.02587856 | ns |
| GAD1     | 0.007771976 | -0.00547326 | 1.466188748 | 0.142617803 | 0.266801996 | -6.01221264 | ns |
| ITGA6    | -0.01671021 | 0.070687955 | -1.46614448 | 0.142629423 | 0.266801996 | -6.0240268  | ns |
| APOB     | 0.006661446 | -0.03276531 | 1.463560089 | 0.14333449  | 0.267812579 | -6.0307488  | ns |
| CLC      | -0.02087081 | 0.045408347 | -1.46349284 | 0.143353103 | 0.267812579 | -6.02569748 | ns |
| SCARB1   | -0.01842428 | 0.101875395 | -1.46298008 | 0.143493686 | 0.267903812 | -6.01926361 | ns |
| ARNT     | -0.011742   | 0.047674603 | -1.45947297 | 0.144455769 | 0.269527698 | -6.02454697 | ns |
| AP3S2    | -0.01397776 | 0.074404045 | -1.45831803 | 0.144773163 | 0.269812563 | -6.0392589  | ns |
| CD14     | -0.01270274 | -0.0185986  | -1.45824807 | 0.144793249 | 0.269812563 | -6.01970391 | ns |
| GRSF1    | -0.02373143 | 0.073775296 | -1.45549317 | 0.145553797 | 0.271056817 | -6.02462079 | ns |
| SFTPA1   | -0.017673   | 0.089518938 | -1.45496956 | 0.145698554 | 0.27115346  | -6.03063026 | ns |
| EDN1     | -0.00825553 | -0.02383583 | -1.4530774  | 0.146223076 | 0.271956295 | -6.03333553 | ns |
| PDAP1    | -0.02847571 | -0.03326092 | -1.45155382 | 0.14664596  | 0.272569194 | -6.04927816 | ns |
| KAZN     | -0.03065217 | -0.05088238 | -1.4500846  | 0.14705521  | 0.273033773 | -6.05006571 | ns |
| DAG1     | -0.01513878 | -0.01277484 | -1.44998546 | 0.14708292  | 0.273033773 | -6.04874911 | ns |
| PCYT2    | -0.02220662 | -0.02545529 | -1.44918181 | 0.147307094 | 0.273276185 | -6.0513655  | ns |
| LPA      | -0.05230136 | -0.13674861 | -1.44844804 | 0.147512544 | 0.273483573 | -6.0398192  | ns |
| CEP350   | 0.01096949  | 0.013706483 | 1.446637782 | 0.148019262 | 0.274152149 | -6.04048687 | ns |
| TXNL1    | -0.02931023 | 0.30466603  | -1.44648895 | 0.148060938 | 0.274152149 | -6.04296469 | ns |
| MAG      | -0.01362455 | -0.02653284 | -1.4442783  | 0.148681436 | 0.274864797 | -6.04626088 | ns |
| DFFA     | -0.02101113 | 0.024625016 | -1.44390701 | 0.148785303 | 0.274864797 | -6.06139922 | ns |
| MCFD2    | -0.01360958 | 0.003837824 | -1.44380532 | 0.148814234 | 0.274864797 | -6.05353875 | ns |



|          |             |             |             |             |             |             |    |
|----------|-------------|-------------|-------------|-------------|-------------|-------------|----|
| JMJD1C   | -0.01663106 | 0.054007275 | -1.44377779 | 0.148822344 | 0.274864797 | -6.04459113 | ns |
| SCGB2A2  | 0.008987444 | 0.01818387  | 1.441063273 | 0.149587637 | 0.275927887 | -6.04967889 | ns |
| ECI2     | -0.01786539 | 0.081604194 | -1.44088372 | 0.149638364 | 0.275927887 | -6.0499358  | ns |
| REST     | 0.010599026 | 0.023897697 | 1.440731371 | 0.149681429 | 0.275927887 | -6.04895398 | ns |
| SH3BP1   | -0.01435286 | 0.081250058 | -1.43812865 | 0.150417792 | 0.277110381 | -6.06721365 | ns |
| KCNH2    | -0.02187091 | 0.214804303 | -1.43752481 | 0.15058963  | 0.27725203  | -6.05592398 | ns |
| VMO1     | -0.02085869 | -0.09710761 | -1.43579326 | 0.151081623 | 0.277982571 | -6.0652884  | ns |
| FCGR3B   | -0.01538597 | -0.04711524 | -1.43371187 | 0.151674951 | 0.278898525 | -6.06819963 | ns |
| ACP1     | -0.01293631 | 0.062168837 | -1.43253905 | 0.152010401 | 0.279225707 | -6.06150048 | ns |
| RGBM     | -0.00767148 | 0.002459327 | -1.43241888 | 0.152044135 | 0.279225707 | -6.07760884 | ns |
| ECSCR    | -0.01493537 | 0.102597749 | -1.43117597 | 0.152400513 | 0.279704273 | -6.06562178 | ns |
| ITGB5    | 0.011354477 | 0.024052368 | 1.429989952 | 0.152740142 | 0.280054971 | -6.07795798 | ns |
| LZTFL1   | -0.02046331 | 0.015091715 | -1.42926291 | 0.152949306 | 0.280054971 | -6.06822778 | ns |
| NPHS2    | 0.030059922 | 0.279344091 | 1.429059026 | 0.153008044 | 0.280054971 | -6.0664448  | ns |
| NAA80    | -0.03476535 | 0.011217804 | -1.42890934 | 0.153050957 | 0.280054971 | -6.06818554 | ns |
| MAP3K5   | -0.03087924 | 0.119041837 | -1.42883947 | 0.153071142 | 0.280054971 | -6.0680439  | ns |
| GCC1     | -0.03128282 | -0.0693852  | -1.42801777 | 0.15330689  | 0.280310657 | -6.08268974 | ns |
| PKLR     | -0.0208688  | 0.06966314  | -1.42764872 | 0.153413324 | 0.280329729 | -6.07897954 | ns |
| PTK7     | -0.01145095 | -0.0118655  | -1.4253673  | 0.154071768 | 0.281293109 | -6.07320334 | ns |
| STX6     | -0.02121929 | 0.130004856 | -1.42515479 | 0.154133211 | 0.281293109 | -6.07326519 | ns |
| SSBP1    | 0.010250629 | 0.023045651 | 1.424401727 | 0.154350969 | 0.281514572 | -6.07304294 | ns |
| CXCL3    | -0.02940703 | -0.09518409 | -1.42212856 | 0.155009293 | 0.282412764 | -6.0850793  | ns |
| FOS      | -0.01025617 | -0.02025912 | -1.42203511 | 0.15503687  | 0.282412764 | -6.07400546 | ns |
| KDM3A    | -0.02612426 | 0.255803182 | -1.42126717 | 0.155259844 | 0.282642608 | -6.07747165 | ns |
| PYY      | -0.0272941  | 0.091013097 | -1.41899551 | 0.155921058 | 0.283603745 | -6.08101542 | ns |
| USP8     | -0.02914952 | 0.046545447 | -1.41874644 | 0.155993638 | 0.283603745 | -6.08297398 | ns |
| ARHGAP45 | -0.02351892 | -0.00201376 | -1.4182988  | 0.156124123 | 0.283603745 | -6.08372936 | ns |
| HMGCL    | -0.01387391 | 0.036305756 | -1.41812031 | 0.156176309 | 0.283603745 | -6.08316902 | ns |
| LTO1     | -0.01272318 | 0.019807427 | -1.41631012 | 0.156705346 | 0.284387577 | -6.08617693 | ns |
| TTN      | -0.01898501 | 0.133064876 | -1.41344092 | 0.157546828 | 0.285737104 | -6.08882686 | ns |
| CPTP     | 0.011385441 | 0.063736817 | 1.410892644 | 0.158296966 | 0.286919392 | -6.09240026 | ns |
| IL13     | -0.01534291 | 0.067688192 | -1.40926882 | 0.158776281 | 0.28760964  | -6.09605537 | ns |
| NLGN2    | 0.013799144 | 0.090306197 | 1.408080068 | 0.159127979 | 0.288068009 | -6.09818066 | ns |
| PRR4     | 0.019859657 | 0.058512286 | 1.407519083 | 0.15929419  | 0.288120134 | -6.09557656 | ns |
| SMARCA2  | -0.01936861 | 0.053405972 | -1.40731674 | 0.159354115 | 0.288120134 | -6.09859056 | ns |
| SDCCAG8  | -0.03275928 | -0.01535221 | -1.40557705 | 0.159869863 | 0.288873762 | -6.11351605 | ns |
| SIGLEC5  | -0.03591154 | -0.34862665 | -1.40500561 | 0.160039822 | 0.289002028 | -6.11147367 | ns |
| KIRREL1  | 0.016530252 | 0.123520414 | 1.404383149 | 0.160225384 | 0.289158295 | -6.10334314 | ns |
| DGKA     | -0.01525334 | 0.034660368 | -1.40209272 | 0.160908206 | 0.290120803 | -6.10435023 | ns |
| FNTA     | -0.00996232 | 0.02094789  | -1.40150688 | 0.161082639 | 0.290120803 | -6.11918982 | ns |
| DIPK1C   | 0.011980336 | 0.053822815 | 1.401286223 | 0.16114903  | 0.290120803 | -6.10700196 | ns |
| RALB     | 0.00850739  | -0.01002296 | 1.401262789 | 0.161156145 | 0.290120803 | -6.10550538 | ns |
| CDSN     | -0.01273474 | -0.00954196 | -1.40043643 | 0.161402677 | 0.290385593 | -6.12206235 | ns |
| YWHAQ    | -0.02069565 | 0.026547805 | -1.39718641 | 0.162377991 | 0.291859132 | -6.11324287 | ns |
| CLEC14A  | -0.00896595 | -0.01898047 | -1.39704035 | 0.162421606 | 0.291859132 | -6.12255678 | ns |
| CDH1     | 0.01194389  | 0.007051752 | 1.395719198 | 0.162820119 | 0.292395294 | -6.10307613 | ns |
| RNF168   | -0.01165838 | 0.034100253 | -1.39407369 | 0.163315954 | 0.293105462 | -6.11548299 | ns |
| CSF2RB   | -0.01204475 | -0.04826485 | -1.39093306 | 0.16426631  | 0.294546586 | -6.11982571 | ns |
| REG3A    | 0.018004716 | 0.007334635 | 1.390342525 | 0.164444839 | 0.294546586 | -6.1362487  | ns |
| ANGPT1   | -0.02546001 | -0.07270749 | -1.390137   | 0.164507516 | 0.294546586 | -6.12888001 | ns |
| ATP5F1   | -0.03313936 | -0.08554101 | -1.39008735 | 0.164522425 | 0.294546586 | -6.13322524 | ns |
| PTPN1    | -0.02401119 | 0.050322175 | -1.38385048 | 0.166424467 | 0.29774913  | -6.13746489 | ns |
| LUZP2    | -0.0120274  | 0.030133536 | -1.38355357 | 0.166515181 | 0.29774913  | -6.14402021 | ns |
| PTPN9    | -0.0106939  | 0.02560713  | -1.38144174 | 0.167163749 | 0.298697238 | -6.13185432 | ns |
| SNX9     | -0.02043395 | 0.030647864 | -1.38115979 | 0.167249994 | 0.298697238 | -6.14199576 | ns |
| NFKB2    | -0.01587052 | 0.103181734 | -1.37987235 | 0.167646158 | 0.299221749 | -6.14249199 | ns |
| VCPKMT   | -0.02427908 | 0.200195614 | -1.37917699 | 0.167860722 | 0.299421691 | -6.13513386 | ns |
| TERF1    | 0.007854006 | 0.013963673 | 1.378087324 | 0.168196837 | 0.299838072 | -6.13748627 | ns |
| EXOSC10  | -0.01648099 | 0.148431382 | -1.37766591 | 0.168326969 | 0.299886974 | -6.13840345 | ns |
| TNFRSF17 | -0.01093416 | -0.03280297 | -1.37485491 | 0.169196771 | 0.300906223 | -6.14397905 | ns |
| CLEC2L   | -0.01452702 | 0.095013194 | -1.37472774 | 0.169236247 | 0.300906223 | -6.14360807 | ns |
| TAGLN3   | -0.01680321 | -0.00809489 | -1.37465192 | 0.169259887 | 0.300906223 | -6.14132082 | ns |
| PIBF1    | -0.02146054 | 0.025787118 | -1.37448413 | 0.169311275 | 0.300906223 | -6.1582147  | ns |
| PSMD1    | -0.01363078 | 0.032713185 | -1.37363415 | 0.169575125 | 0.301191827 | -6.1593747  | ns |
| ZFYVE19  | -0.02475753 | -0.00220973 | -1.37322436 | 0.169702519 | 0.301234867 | -6.15782659 | ns |
| PAIP2B   | -0.01470668 | 0.038378239 | -1.37231545 | 0.169985797 | 0.301326124 | -6.14298377 | ns |

|          |             |             |             |             |             |             |    |
|----------|-------------|-------------|-------------|-------------|-------------|-------------|----|
| GIPR     | -0.01231038 | 0.022491418 | -1.37218657 | 0.170025835 | 0.301326124 | -6.14554383 | ns |
| GMFG     | -0.01982493 | -0.01471268 | -1.37196789 | 0.170093305 | 0.301326124 | -6.16087101 | ns |
| PRSS53   | 0.010307348 | 0.003924755 | 1.371732102 | 0.170166705 | 0.301326124 | -6.16094716 | ns |
| ICAM2    | 0.009366647 | -0.03876842 | 1.370499202 | 0.170550957 | 0.301823511 | -6.16345509 | ns |
| APOC1    | 0.010105245 | 0.016069799 | 1.36950218  | 0.170862248 | 0.302191256 | -6.16233668 | ns |
| LGALS8   | -0.01806864 | 0.045095938 | -1.3660093  | 0.171955853 | 0.303941337 | -6.16990006 | ns |
| CDKN1A   | -0.03164001 | -0.04700679 | -1.36282829 | 0.172956693 | 0.305525435 | -6.16668622 | ns |
| TLR2     | 0.00636037  | -0.00580661 | 1.361833684 | 0.173270472 | 0.305894667 | -6.16704991 | ns |
| CD3E     | -0.00951423 | 0.022095897 | -1.36026519 | 0.173766104 | 0.306584304 | -6.16917    | ns |
| ENTPD2   | 0.012473405 | -0.0141158  | 1.357584899 | 0.174615803 | 0.307870814 | -6.16662339 | ns |
| LYPLA2   | -0.02933236 | 0.294517046 | -1.35699589 | 0.17480283  | 0.307870814 | -6.16831432 | ns |
| IL11     | -0.01876543 | 0.099355037 | -1.35696824 | 0.174811579 | 0.307870814 | -6.1678887  | ns |
| OTUD6B   | -0.01602369 | 0.022561018 | -1.3553943  | 0.17531176  | 0.308306673 | -6.18198677 | ns |
| IL34     | 0.010219838 | -0.02777598 | 1.355383363 | 0.175315796 | 0.308306673 | -6.1691449  | ns |
| EIF2AK2  | -0.02979418 | 0.030491877 | -1.35473269 | 0.175522599 | 0.308306673 | -6.18112172 | ns |
| PON1     | 0.006943859 | -0.00682404 | 1.354514681 | 0.175592003 | 0.308306673 | -6.18335146 | ns |
| MORF4L1  | 0.011019025 | 0.042431567 | 1.35429965  | 0.175660841 | 0.308306673 | -6.17721113 | ns |
| RNF43    | -0.0161243  | 0.106206631 | -1.35420016 | 0.17569257  | 0.308306673 | -6.17734493 | ns |
| IL10RA   | -0.01687807 | 0.098333949 | -1.35317075 | 0.176021338 | 0.308597556 | -6.1729987  | ns |
| COX5B    | -0.02025535 | 0.011783154 | -1.35301854 | 0.176069701 | 0.308597556 | -6.17991551 | ns |
| SULT1A1  | 0.037951685 | -0.14694227 | 1.351901299 | 0.176426609 | 0.309037611 | -6.18894236 | ns |
| NPR1     | 0.011474837 | 0.083365112 | 1.349834203 | 0.177089497 | 0.310012788 | -6.1760936  | ns |
| DPP10    | 0.009672159 | 0.009161886 | 1.348219929 | 0.177607558 | 0.310733414 | -6.18883122 | ns |
| EGFLAM   | 0.0081784   | 0.02256098  | 1.347699319 | 0.177774855 | 0.310839867 | -6.19231616 | ns |
| FSTL1    | -0.00592186 | -0.01952285 | -1.3472243  | 0.177928249 | 0.310921895 | -6.18051059 | ns |
| EIF4G3   | -0.01815299 | 0.084483404 | -1.34666695 | 0.178107183 | 0.31104843  | -6.19580566 | ns |
| SNU13    | -0.01759619 | 0.150081495 | -1.34507436 | 0.178621515 | 0.311760206 | -6.18246245 | ns |
| SEPTIN3  | -0.02017073 | -0.00302157 | -1.34145199 | 0.179793371 | 0.313618067 | -6.2027674  | ns |
| HTR1A    | 0.020049648 | 0.193318319 | 1.339539749 | 0.180415212 | 0.314514878 | -6.191686   | ns |
| ALMS1    | -0.01192255 | 0.03938938  | -1.33686442 | 0.181286817 | 0.31579399  | -6.20051007 | ns |
| SLIRP    | -0.01549525 | 0.093171032 | -1.33631737 | 0.181465802 | 0.31579399  | -6.19291863 | ns |
| GP1BA    | -0.0092791  | 0.007094555 | -1.33629339 | 0.181473395 | 0.31579399  | -6.20010244 | ns |
| CASQ2    | 0.012912785 | 0.063475369 | 1.335403797 | 0.181764443 | 0.315924815 | -6.19533275 | ns |
| ATRN     | -0.00452123 | -0.01673262 | -1.33540037 | 0.181764962 | 0.315924815 | -6.20982946 | ns |
| MAVS     | -0.02705393 | 0.080756009 | -1.33237742 | 0.182756383 | 0.317353689 | -6.20029051 | ns |
| AMFR     | -0.01875286 | 0.073026188 | -1.33223106 | 0.18280442  | 0.317353689 | -6.20072351 | ns |
| SKAP2    | -0.03023064 | -0.01939159 | -1.32979352 | 0.183605986 | 0.318322591 | -6.21466171 | ns |
| SMAD1    | -0.02366754 | 0.030859878 | -1.32967484 | 0.183645591 | 0.318322591 | -6.20386264 | ns |
| GP2      | 0.02442723  | 0.113621163 | 1.329009596 | 0.183865217 | 0.318322591 | -6.19886861 | ns |
| NFE2     | -0.02023611 | 0.033972294 | -1.32893474 | 0.183889611 | 0.318322591 | -6.20481282 | ns |
| CD163    | -0.01249507 | -0.02174901 | -1.32858969 | 0.184003123 | 0.318322591 | -6.21445969 | ns |
| RAB27B   | -0.02194826 | -0.14291056 | -1.32854827 | 0.184016621 | 0.318322591 | -6.21910097 | ns |
| LRPAP1   | -0.01650666 | 0.08690824  | -1.32801819 | 0.184191643 | 0.318436707 | -6.22072813 | ns |
| VSIG2    | -0.01427144 | 0.014193269 | -1.32674325 | 0.184613238 | 0.318976719 | -6.22048324 | ns |
| XRCC4    | -0.01042969 | 0.008474459 | -1.32313481 | 0.185810626 | 0.320831669 | -6.21271629 | ns |
| AFAP1    | -0.02255304 | 0.1946143   | -1.322846   | 0.18590657  | 0.320831669 | -6.21364276 | ns |
| DLG4     | -0.0191469  | 0.079126732 | -1.32179426 | 0.186256177 | 0.321245148 | -6.22774518 | ns |
| AK2      | -0.02830584 | -0.03490324 | -1.31989608 | 0.18688921  | 0.322090553 | -6.23023538 | ns |
| SERPINB5 | 0.01350289  | -0.03698574 | 1.319664984 | 0.186966948 | 0.322090553 | -6.21769134 | ns |
| RYR1     | 0.009253407 | 0.028298676 | 1.317979939 | 0.187530447 | 0.322870817 | -6.21828739 | ns |
| SOX9     | -0.0070531  | -0.01590623 | -1.31740727 | 0.187722115 | 0.323010357 | -6.22022742 | ns |
| BAX      | -0.02525222 | 0.023373501 | -1.31702746 | 0.18784948  | 0.323039153 | -6.22003857 | ns |
| ARF6     | -0.02830135 | -0.07728748 | -1.31479153 | 0.188599473 | 0.324137999 | -6.23582665 | ns |
| MSMB     | -0.01985758 | -0.09660219 | -1.31419778 | 0.18879944  | 0.324183637 | -6.22985391 | ns |
| ZNF830   | 0.021411328 | 0.29561881  | 1.314052427 | 0.188848071 | 0.324183637 | -6.23712635 | ns |
| PI16     | 0.006353762 | 0.005984555 | 1.313716441 | 0.188961116 | 0.324187108 | -6.23741108 | ns |
| LAMA1    | 0.014150182 | 0.125759385 | 1.311496751 | 0.189710021 | 0.325270622 | -6.22675157 | ns |
| ITGAL    | -0.01166011 | -0.03994738 | -1.3110849  | 0.189849104 | 0.325270622 | -6.22694683 | ns |
| CLIP2    | -0.03230617 | -0.05597876 | -1.30974134 | 0.190302963 | 0.325270622 | -6.2396189  | ns |
| MYO6     | 0.009713784 | 0.021837581 | 1.309617986 | 0.190344483 | 0.325270622 | -6.24467886 | ns |
| CXADR    | -0.01429802 | 0.043997185 | -1.30961466 | 0.190345833 | 0.325270622 | -6.23978367 | ns |
| LGALS4   | 0.01479256  | -0.03602431 | 1.309608598 | 0.190347912 | 0.325270622 | -6.23773363 | ns |
| BTD      | -0.00540963 | -0.0210061  | -1.30934078 | 0.190438359 | 0.325270622 | -6.24405619 | ns |
| QSOX1    | -0.01098717 | 0.00675125  | -1.30920764 | 0.190483823 | 0.325270622 | -6.23476081 | ns |
| SPINT2   | -0.01133487 | -0.02112183 | -1.30648641 | 0.19140669  | 0.326655486 | -6.24517433 | ns |
| MYLPF    | -0.01241803 | 0.075472313 | -1.30611271 | 0.191534105 | 0.326682002 | -6.23493997 | ns |

|         |             |              |             |             |             |             |    |
|---------|-------------|--------------|-------------|-------------|-------------|-------------|----|
| DCTPP1  | 0.008514046 | -0.01273703  | 1.305563841 | 0.191720544 | 0.3268091   | -6.24285082 | ns |
| IGFL4   | 0.019601545 | -0.178911512 | 1.301426469 | 0.193132459 | 0.329023793 | -6.23947507 | ns |
| CSH1    | -0.00813172 | -0.01500649  | -1.30079445 | 0.193348186 | 0.329065634 | -6.25418869 | ns |
| PRELP   | -0.00625179 | -0.02761078  | -1.30069508 | 0.193382407 | 0.329065634 | -6.24928731 | ns |
| PFDN2   | -0.01545102 | 0.000587926  | -1.29766672 | 0.194421748 | 0.330641528 | -6.24585725 | ns |
| STAT2   | -0.02025442 | 0.025058675  | -1.29693417 | 0.194673741 | 0.330877371 | -6.24527062 | ns |
| HSP90B1 | -0.01886074 | 0.15075284   | -1.29633473 | 0.194880154 | 0.331035515 | -6.24487633 | ns |
| BLOC1S2 | -0.01915411 | 0.087829121  | -1.29463423 | 0.195466264 | 0.331838076 | -6.25041902 | ns |
| CLEC3B  | -0.00559054 | 0.000759801  | -1.29237475 | 0.196247175 | 0.332970221 | -6.25378197 | ns |
| UROD    | -0.01821167 | 0.00481737   | -1.28951115 | 0.197240135 | 0.334460623 | -6.25688113 | ns |
| KLK14   | -0.01276218 | 0.00705239   | -1.28767561 | 0.197878107 | 0.335347691 | -6.2737856  | ns |
| STX16   | -0.01634324 | 0.08181261   | -1.28505727 | 0.198792059 | 0.336701167 | -6.26178768 | ns |
| CES2    | 0.015429621 | 0.022069719  | 1.284018966 | 0.199154765 | 0.336951107 | -6.27026776 | ns |
| SEMA6C  | 0.006911212 | 0.031047802  | 1.283975211 | 0.199170415 | 0.336951107 | -6.26187679 | ns |
| HGS     | -0.02156437 | 0.049616302  | -1.28353479 | 0.199324552 | 0.337016614 | -6.26372938 | ns |
| PLEKH01 | -0.01814463 | 0.046256373  | -1.2823363  | 0.199743876 | 0.337530161 | -6.27877374 | ns |
| CGA     | 0.023025348 | 0.196103708  | 1.281963902 | 0.199874647 | 0.337555794 | -6.27564832 | ns |
| NOP56   | -0.028113   | 0.32764567   | -1.28023237 | 0.20048318  | 0.338387796 | -6.26698321 | ns |
| RNF41   | -0.01879077 | 0.040599887  | -1.27944254 | 0.200760995 | 0.33866095  | -6.26893703 | ns |
| CETN3   | -0.01986987 | 0.020868665  | -1.27887209 | 0.200961295 | 0.338803107 | -6.2820917  | ns |
| AKT1S1  | -0.01834649 | -0.02756892  | -1.27737974 | 0.201487896 | 0.339494897 | -6.2717954  | ns |
| GRK5    | -0.01417683 | 0.073062347  | -1.27663141 | 0.201752085 | 0.339743995 | -6.27316666 | ns |
| SPOCK1  | 0.006980252 | 0.00351267   | 1.275996303 | 0.201976234 | 0.339925419 | -6.27991592 | ns |
| FDX2    | -0.01476297 | 0.026710124  | -1.27453807 | 0.20249249  | 0.340516287 | -6.27420628 | ns |
| CA8     | 0.006610564 | 0.02581641   | 1.274272656 | 0.202586499 | 0.340516287 | -6.27420092 | ns |
| BLOC1S3 | -0.01052422 | 0.066570655  | -1.27401512 | 0.20267716  | 0.340516287 | -6.28933761 | ns |
| SLC27A4 | -0.0184979  | 0.076762618  | -1.27226128 | 0.203299933 | 0.34136619  | -6.2782751  | ns |
| CD200R1 | 0.009548269 | 0.016221367  | 1.270562724 | 0.203903589 | 0.342183035 | -6.28819089 | ns |
| OGFR    | -0.00910197 | 0.002892987  | -1.26868916 | 0.204571253 | 0.343106294 | -6.28969974 | ns |
| REXO2   | 0.012811734 | 0.098420301  | 1.266362938 | 0.205402796 | 0.34419338  | -6.28451994 | ns |
| ERP29   | -0.03017799 | -0.04564359  | -1.26621622 | 0.205455158 | 0.34419338  | -6.28644195 | ns |
| PPM1B   | -0.0160916  | 0.110689739  | -1.26505605 | 0.205870843 | 0.344692008 | -6.28582124 | ns |
| FLRT2   | 0.007518494 | -0.00756602  | 1.264025213 | 0.206240272 | 0.345112662 | -6.2950149  | ns |
| LSM8    | -0.02206879 | 0.284035071  | -1.26250874 | 0.206785067 | 0.345826114 | -6.29648426 | ns |
| ACAN    | 0.007733301 | -0.00876062  | 1.261642559 | 0.207096797 | 0.346149197 | -6.29551081 | ns |
| STAU1   | -0.0173698  | 0.141479601  | -1.26018408 | 0.207622537 | 0.346783542 | -6.29106717 | ns |
| ACTN4   | -0.0085792  | 0.020719715  | -1.25993066 | 0.207713841 | 0.346783542 | -6.29397352 | ns |
| OPLAH   | -0.01745677 | 0.026716267  | -1.25710616 | 0.208734667 | 0.348288702 | -6.29704168 | ns |
| SPTLC1  | -0.00938767 | 0.044138998  | -1.25292015 | 0.21025367  | 0.35062291  | -6.31580992 | ns |
| NCR3LG1 | 0.00794462  | -0.00379248  | 1.25206196  | 0.210566225 | 0.350943708 | -6.31578874 | ns |
| GCNT1   | -0.00917148 | -0.01039401  | -1.25131398 | 0.210839083 | 0.351198016 | -6.31144233 | ns |
| SELL    | -0.00570325 | 0.010235057  | -1.24819665 | 0.211977911 | 0.352893671 | -6.32171569 | ns |
| IGFBP3  | -0.00733103 | -0.00385257  | -1.24714333 | 0.212363971 | 0.353334927 | -6.31863463 | ns |
| GORASP2 | -0.01187464 | 0.037415115  | -1.24418245 | 0.213451279 | 0.354941762 | -6.32555566 | ns |
| FGL1    | -0.01544489 | -0.03821862  | -1.24105734 | 0.214603374 | 0.356462177 | -6.3295949  | ns |
| CTNNA1  | 0.008834191 | 0.053493578  | 1.241041401 | 0.214609762 | 0.356462177 | -6.3178939  | ns |
| SAMD9L  | -0.01967468 | 0.019324208  | -1.23996899 | 0.215005828 | 0.356917008 | -6.3279612  | ns |
| SPARC   | -0.01894185 | -0.10878091  | -1.23649264 | 0.216294314 | 0.35885193  | -6.33417937 | ns |
| ARG2    | -0.01058041 | 0.049651298  | -1.23458861 | 0.217002428 | 0.359822311 | -6.33770168 | ns |
| PPP2R5A | -0.02926677 | 0.03624698   | -1.23273571 | 0.217693125 | 0.360762727 | -6.33963676 | ns |
| COMMD1  | -0.01535867 | 0.020862042  | -1.23173209 | 0.218068388 | 0.361179634 | -6.32839798 | ns |
| EFNB2   | 0.014397066 | 0.027226755  | 1.231298488 | 0.218230404 | 0.361243073 | -6.32919679 | ns |
| IFNL1   | -0.01164417 | -0.01199736  | -1.22769848 | 0.219579355 | 0.363270094 | -6.33359031 | ns |
| CEP152  | -0.01029483 | 0.020859488  | -1.22655998 | 0.220007243 | 0.363605113 | -6.33258232 | ns |
| UPK3A   | 0.012485386 | 0.034600832  | 1.226496877 | 0.220030902 | 0.363605113 | -6.3357139  | ns |
| IFNG    | -0.02995099 | -0.05072172  | -1.22435578 | 0.220837136 | 0.364658581 | -6.33785547 | ns |
| RGL2    | 0.015615218 | 0.101106061  | 1.224140391 | 0.220918161 | 0.364658581 | -6.34386081 | ns |
| FZD10   | -0.01450907 | 0.078663035  | -1.21783919 | 0.223304098 | 0.368388682 | -6.34556407 | ns |
| CD160   | -0.01175055 | 0.001850212  | -1.21703263 | 0.223610293 | 0.368570974 | -6.3612065  | ns |
| CRACR2A | -0.02268404 | 0.108605813  | -1.21688506 | 0.223667043 | 0.368570974 | -6.34647573 | ns |
| ROBO1   | -0.00605366 | -0.00732379  | -1.21570375 | 0.224116483 | 0.369103288 | -6.35686645 | ns |
| GIP     | -0.01251905 | 0.075396273  | -1.21512246 | 0.224338415 | 0.369260525 | -6.34857734 | ns |
| TGFB2   | -0.01300133 | -0.02043669  | -1.21217171 | 0.225465195 | 0.370906123 | -6.36494023 | ns |
| ADGRV1  | 0.016749797 | 0.076882391  | 1.211200233 | 0.225837656 | 0.371309659 | -6.35422879 | ns |
| SIGLEC9 | -0.0077182  | -0.02995732  | -1.2075542  | 0.227237209 | 0.373282938 | -6.37251569 | ns |
| CACNA1C | 0.007848168 | 0.02314259   | 1.207409249 | 0.227293515 | 0.373282938 | -6.35878144 | ns |

|          |             |             |             |             |             |             |    |
|----------|-------------|-------------|-------------|-------------|-------------|-------------|----|
| CRTAP    | -0.01229178 | 0.062242733 | -1.20640505 | 0.22768023  | 0.373707854 | -6.35932734 | ns |
| FOSB     | -0.01026304 | 0.025276102 | -1.2058951  | 0.227876873 | 0.373748748 | -6.35993622 | ns |
| PRKAB1   | -0.01412854 | 0.058418285 | -1.20535588 | 0.228084827 | 0.373748748 | -6.36077728 | ns |
| THBS2    | -0.00893633 | 0.012417318 | -1.20534388 | 0.228089133 | 0.373748748 | -6.37028734 | ns |
| AGT      | 0.005384479 | 0.029067909 | 1.203828183 | 0.228674403 | 0.37449762  | -6.37479693 | ns |
| SLC28A1  | -0.01460306 | 0.097488772 | -1.20343589 | 0.228826649 | 0.374536892 | -6.36048186 | ns |
| PPP1CC   | -0.02014574 | 0.042253375 | -1.2028304  | 0.229060391 | 0.374709435 | -6.37614346 | ns |
| APOH     | 0.009334758 | 0.002796025 | 1.202343807 | 0.229248875 | 0.37480779  | -6.37387436 | ns |
| COX6B1   | -0.00772935 | 0.015733357 | -1.19975937 | 0.230251161 | 0.376088149 | -6.38080781 | ns |
| CASP9    | 0.014832853 | 0.027052238 | 1.199661866 | 0.230289593 | 0.376088149 | -6.36584837 | ns |
| CINP     | 0.011062494 | 0.058903026 | 1.198299987 | 0.230818852 | 0.376741783 | -6.37494435 | ns |
| ROBO4    | 0.004242582 | -0.00486291 | 1.197441366 | 0.231153392 | 0.376962544 | -6.36975746 | ns |
| F2R      | -0.01494961 | -0.01192922 | -1.19728921 | 0.2312123   | 0.376962544 | -6.37984184 | ns |
| EBAG9    | -0.02461258 | -0.01514031 | -1.19680927 | 0.231399485 | 0.377057196 | -6.377151   | ns |
| TCL1B    | 0.020312153 | 0.143829201 | 1.195504054 | 0.23190897  | 0.377676627 | -6.37274896 | ns |
| ARHGAP30 | -0.00970257 | 0.08474333  | -1.19236766 | 0.233135646 | 0.379462701 | -6.38198679 | ns |
| SPINK4   | 0.015882473 | 0.028102072 | 1.190919621 | 0.233703563 | 0.380175156 | -6.38717149 | ns |
| CCL24    | -0.02157652 | 0.04480936  | -1.18956955 | 0.234233981 | 0.38082585  | -6.38899196 | ns |
| CABP2    | -0.0159592  | 0.107420937 | -1.18887163 | 0.234508864 | 0.381060592 | -6.38018018 | ns |
| ADGRE2   | 0.007142254 | -0.00303074 | 1.188297195 | 0.234734649 | 0.381215337 | -6.3915993  | ns |
| LAT2     | -0.03243218 | 0.02581102  | -1.18715031 | 0.23518677  | 0.381737281 | -6.38913661 | ns |
| CDH22    | 0.006771851 | 0.013496106 | 1.183272411 | 0.236719628 | 0.384011841 | -6.39271619 | ns |
| ASPSCR1  | -0.01615788 | 0.002254882 | -1.18187457 | 0.237273576 | 0.384696748 | -6.40273962 | ns |
| GLB1     | -0.01042142 | -0.00268415 | -1.18122992 | 0.237529795 | 0.384898447 | -6.39554815 | ns |
| PGLYRP4  | 0.014778414 | 0.107113057 | 1.180775717 | 0.237710515 | 0.384965312 | -6.38851222 | ns |
| DNAJB6   | -0.02017731 | -0.00258238 | -1.18046329 | 0.237834734 | 0.384965312 | -6.38553544 | ns |
| YARS1    | -0.03485351 | -0.18103958 | -1.17914876 | 0.238357089 | 0.385403957 | -6.4038215  | ns |
| MYH4     | 0.011062604 | 0.062714261 | 1.179118368 | 0.238369708 | 0.385403957 | -6.39045419 | ns |
| CTSH     | -0.01893539 | -0.02036375 | -1.17499937 | 0.240013583 | 0.387847074 | -6.39571253 | ns |
| DIPK2B   | -0.006338   | 0.021271387 | -1.17368    | 0.240541682 | 0.388313846 | -6.39854765 | ns |
| COL2A1   | -0.0189423  | 0.076571737 | -1.17361351 | 0.240568407 | 0.388313846 | -6.39780977 | ns |
| PCDH7    | -0.00807313 | 0.044885238 | -1.17283913 | 0.240878388 | 0.388466801 | -6.41119132 | ns |
| CPOX     | 0.006181623 | 0.008684269 | 1.172493694 | 0.241017479 | 0.388466801 | -6.39784747 | ns |
| MMP15    | 0.01121826  | 0.08078203  | 1.172380703 | 0.241062275 | 0.388466801 | -6.4130614  | ns |
| SEC31A   | -0.01824119 | -0.07002778 | -1.17097152 | 0.241628731 | 0.389164861 | -6.40088544 | ns |
| TP53INP1 | 0.008261076 | 0.047242235 | 1.169181168 | 0.242349144 | 0.390109978 | -6.40365571 | ns |
| LGALS3   | -0.00747873 | -0.02689129 | -1.16815311 | 0.242763173 | 0.390399195 | -6.4131004  | ns |
| NT5C3A   | 0.022148712 | -0.05079403 | 1.167960037 | 0.242841032 | 0.390399195 | -6.41406645 | ns |
| TPD52L2  | -0.02541555 | -0.09761639 | -1.16774032 | 0.24292991  | 0.390399195 | -6.40545307 | ns |
| GPNMB    | -0.00703334 | -0.01349286 | -1.16576175 | 0.243729484 | 0.391468698 | -6.40108052 | ns |
| HS3ST3B1 | 0.009362757 | -0.00308259 | 1.163640527 | 0.244587869 | 0.392631433 | -6.41658072 | ns |
| DGKZ     | -0.00873031 | 0.008008366 | -1.16236008 | 0.245107596 | 0.39324955  | -6.41132489 | ns |
| MTHFSD   | -0.02626896 | 0.005947298 | -1.16028594 | 0.245950551 | 0.393938121 | -6.4194665  | ns |
| KIR3DL2  | -0.02000782 | 0.221900985 | -1.16019926 | 0.245986126 | 0.393938121 | -6.41122314 | ns |
| EPHA10   | -0.01596449 | 0.094182104 | -1.16006134 | 0.246042213 | 0.393938121 | -6.41378007 | ns |
| PXDNL    | 0.0135054   | 0.078730815 | 1.159976214 | 0.246076415 | 0.393938121 | -6.42642879 | ns |
| ARAF     | -0.0156503  | 0.068298952 | -1.15831915 | 0.246751939 | 0.394803103 | -6.42173097 | ns |
| EVI2B    | 0.009544313 | 0.035949431 | 1.157145782 | 0.247231202 | 0.395353292 | -6.41473644 | ns |
| LTA      | -0.0099522  | -0.01785238 | -1.1552493  | 0.248006342 | 0.396375762 | -6.42873076 | ns |
| TJP3     | 0.009707356 | 0.033083203 | 1.154497379 | 0.248314609 | 0.396651345 | -6.42083458 | ns |
| OBP2B    | 0.015731459 | -0.03002272 | 1.153151137 | 0.248866473 | 0.397115086 | -6.42594531 | ns |
| AOC1     | -0.01416631 | 0.084091405 | -1.15312599 | 0.24887692  | 0.397115086 | -6.42194142 | ns |
| SUMF2    | -0.01313901 | -0.07254732 | -1.15265169 | 0.249071147 | 0.397176952 | -6.43677239 | ns |
| TDRKH    | -0.02133803 | 0.085080033 | -1.15236906 | 0.249187732 | 0.397176952 | -6.42261227 | ns |
| JAM2     | -0.00591405 | -0.01175586 | -1.14979962 | 0.250244144 | 0.398643154 | -6.44003364 | ns |
| TSC1     | -0.01764644 | 0.165846253 | -1.14843501 | 0.250807297 | 0.399305331 | -6.42557234 | ns |
| LACTB2   | -0.0162492  | 0.015450258 | -1.14812885 | 0.250933316 | 0.399305331 | -6.43467615 | ns |
| PHACTR2  | -0.02646343 | -0.03393942 | -1.1476914  | 0.25111367  | 0.399374682 | -6.44228712 | ns |
| CDC26    | -0.01633945 | 0.044959505 | -1.14713015 | 0.251345624 | 0.399525977 | -6.43940473 | ns |
| SCN2B    | -0.0066424  | 0.011103532 | -1.14381144 | 0.252719959 | 0.401491991 | -6.43237095 | ns |
| ZNF75D   | 0.014195193 | 0.052044865 | 1.141441204 | 0.253704269 | 0.402664609 | -6.44100552 | ns |
| SSH3     | -0.00685128 | 0.020138762 | -1.14137075 | 0.253733863 | 0.402664609 | -6.43273962 | ns |
| SNAP25   | 0.010470093 | 0.03154438  | 1.137537043 | 0.255331924 | 0.404980563 | -6.44013674 | ns |
| NDUFB7   | -0.0202405  | 0.022389467 | -1.13674047 | 0.255664411 | 0.405260277 | -6.45259545 | ns |
| LY75     | -0.00961148 | -0.02239787 | -1.13645042 | 0.255785853 | 0.405260277 | -6.45012481 | ns |
| CEP85    | -0.01559879 | 0.061124103 | -1.13571097 | 0.256095644 | 0.405531064 | -6.44129738 | ns |

|           |             |             |             |             |             |             |    |
|-----------|-------------|-------------|-------------|-------------|-------------|-------------|----|
| FGF19     | 0.019083468 | 0.02515215  | 1.135272525 | 0.256278801 | 0.405601138 | -6.45278417 | ns |
| RAP1A     | -0.01529407 | 0.117862017 | -1.13258396 | 0.25740707  | 0.407166113 | -6.44352481 | ns |
| ROBO2     | -0.0054195  | -0.0017756  | -1.13104006 | 0.258055721 | 0.407971145 | -6.46128327 | ns |
| EPHA4     | 0.006284076 | 0.001125959 | 1.129570241 | 0.258675246 | 0.408729285 | -6.44899345 | ns |
| SEZ6L2    | 0.005654347 | 0.005849029 | 1.128864987 | 0.258972494 | 0.408872102 | -6.45616955 | ns |
| KLK11     | -0.00709029 | -0.0091138  | -1.12869148 | 0.259045681 | 0.408872102 | -6.45670741 | ns |
| FHIP2A    | -0.01086674 | 0.014918149 | -1.12808679 | 0.259301271 | 0.409054409 | -6.44891484 | ns |
| ZP4       | 0.007704313 | 0.038133797 | 1.126131276 | 0.260127946 | 0.410136934 | -6.44989697 | ns |
| CCL2      | 0.012980595 | 0.028783068 | 1.125365972 | 0.260451705 | 0.410425785 | -6.45849296 | ns |
| CMC1      | -0.02042215 | 0.010765939 | -1.12474977 | 0.260712514 | 0.410509112 | -6.46739929 | ns |
| ECM1      | -0.00834908 | -0.05004231 | -1.12457819 | 0.260785754 | 0.410509112 | -6.45189922 | ns |
| GNAS      | -0.01973629 | 0.228743839 | -1.12221205 | 0.261789648 | 0.411867334 | -6.47101008 | ns |
| CD48      | -0.00699387 | -0.02350429 | -1.12185304 | 0.26194244  | 0.411885797 | -6.46672005 | ns |
| PCBP2     | -0.01616028 | -0.00017281 | -1.11788834 | 0.263631985 | 0.414319374 | -6.47582023 | ns |
| ZNF174    | -0.00820001 | 0.051263643 | -1.11480611 | 0.264951336 | 0.416168855 | -6.46336272 | ns |
| DXO       | -0.01020842 | 0.016189572 | -1.11391711 | 0.265332021 | 0.416542743 | -6.47919666 | ns |
| NMT1      | -0.01472134 | 0.101346928 | -1.11280824 | 0.265808028 | 0.416928949 | -6.48144815 | ns |
| SMS       | -0.01428148 | 0.122758021 | -1.11268007 | 0.265863597 | 0.416928949 | -6.46790984 | ns |
| MENT      | 0.00488834  | 0.007306714 | 1.109960292 | 0.26703376  | 0.418539227 | -6.4707999  | ns |
| CNTF      | 0.007610502 | -0.00629605 | 1.108266272 | 0.267764515 | 0.419459433 | -6.47277731 | ns |
| RANGAP1   | -0.01179237 | 0.059555221 | -1.10653188 | 0.268514068 | 0.420408086 | -6.47378372 | ns |
| M6PR      | -0.00886515 | 0.065963534 | -1.10453571 | 0.269378446 | 0.421535403 | -6.47594839 | ns |
| SCGB3A1   | -0.0056801  | 0.007533294 | -1.10379114 | 0.269701286 | 0.421814545 | -6.4775811  | ns |
| ESAM      | -0.00714952 | -0.00190025 | -1.10317782 | 0.269967067 | 0.422004194 | -6.49185403 | ns |
| NMRK2     | 0.00936858  | 0.067304802 | 1.10211924  | 0.270427492 | 0.42249774  | -6.476463   | ns |
| IZUMO1    | -0.01055065 | 0.059786932 | -1.10149092 | 0.270700702 | 0.422698423 | -6.47715047 | ns |
| GJA8      | -0.01332785 | 0.059133844 | -1.09988847 | 0.271398342 | 0.423561282 | -6.47890198 | ns |
| ICA1      | -0.0188828  | 0.050665138 | -1.09827131 | 0.27210354  | 0.42443501  | -6.48326319 | ns |
| RP2       | -0.01003583 | 0.025341801 | -1.09687698 | 0.272712437 | 0.425157671 | -6.49152469 | ns |
| NEDD4L    | -0.01081337 | -0.03797548 | -1.0964478  | 0.272900417 | 0.425223703 | -6.48351903 | ns |
| NFAT5     | -0.01936749 | 0.141869548 | -1.09522827 | 0.273434188 | 0.425668265 | -6.48484614 | ns |
| ATP6V1F   | -0.01581895 | 0.046970394 | -1.09512989 | 0.273477283 | 0.425668265 | -6.48522059 | ns |
| SYT1      | 0.008638902 | 0.032338692 | 1.094282524 | 0.273848092 | 0.426018342 | -6.50072891 | ns |
| PDP1      | -0.01201249 | 0.069024917 | -1.09352863 | 0.274179277 | 0.426306437 | -6.4879885  | ns |
| SAT2      | -0.01521432 | 0.05538566  | -1.09244669 | 0.274654047 | 0.426817359 | -6.49535473 | ns |
| NFX1      | -0.01504842 | 0.063418784 | -1.08972563 | 0.275851493 | 0.428110193 | -6.49115816 | ns |
| PPP1R14A  | -0.01725114 | -0.00945929 | -1.08957116 | 0.275919009 | 0.428110193 | -6.50686427 | ns |
| TFF2      | 0.012894834 | -0.01632929 | 1.089556059 | 0.275925816 | 0.428110193 | -6.50218819 | ns |
| LATS1     | -0.01856666 | -0.00192792 | -1.08624399 | 0.277388474 | 0.430151007 | -6.4945775  | ns |
| JCHAIN    | -0.01447452 | -0.03091229 | -1.08583957 | 0.277567305 | 0.430199857 | -6.49674529 | ns |
| GDNF      | -0.00871841 | -0.0150574  | -1.08474596 | 0.278051539 | 0.430597334 | -6.4977281  | ns |
| SLC34A3   | 0.010892917 | 0.03523829  | 1.084594517 | 0.278118689 | 0.430597334 | -6.49549034 | ns |
| ACY3      | 0.011895636 | 0.017321984 | 1.080016874 | 0.280151994 | 0.433515539 | -6.50161774 | ns |
| SAFB2     | 0.006080769 | 0.00595971  | 1.077560664 | 0.281246609 | 0.434978866 | -6.51979083 | ns |
| C1QTNF6   | -0.00675548 | 0.015246609 | -1.07503541 | 0.282375584 | 0.43633987  | -6.52249046 | ns |
| SMAD3     | 0.011174169 | 0.055930727 | 1.074924174 | 0.282425464 | 0.43633987  | -6.52082767 | ns |
| LARP1     | -0.01383583 | 0.079535597 | -1.07442236 | 0.282650202 | 0.436456156 | -6.52136331 | ns |
| VASP      | -0.0155371  | 0.021510264 | -1.07269631 | 0.283424117 | 0.437394525 | -6.52304951 | ns |
| SORT1     | -0.00855021 | -0.00768881 | -1.07239969 | 0.283557478 | 0.437394525 | -6.51757557 | ns |
| GABARAPL1 | -0.01476771 | 0.151129101 | -1.07191704 | 0.28377424  | 0.437497773 | -6.51741945 | ns |
| MPI       | -0.02005269 | 0.02168952  | -1.07136092 | 0.284024081 | 0.437651882 | -6.51899813 | ns |
| IL15RA    | -0.00791983 | -0.0277225  | -1.06978755 | 0.284732042 | 0.438511373 | -6.51392656 | ns |
| HNRNPK    | -0.01736792 | 0.051842254 | -1.06876271 | 0.2851938   | 0.438990983 | -6.51308734 | ns |
| ANXA11    | -0.01543653 | -0.13165385 | -1.06772444 | 0.285661626 | 0.439479425 | -6.52535171 | ns |
| ANXA5     | -0.00667116 | -0.01588458 | -1.06628986 | 0.286309742 | 0.440244574 | -6.51675381 | ns |
| BIN2      | -0.02114633 | 0.032309115 | -1.06414304 | 0.287280623 | 0.441504958 | -6.52942416 | ns |
| IL2RB     | -0.00853891 | 0.031361709 | -1.06286135 | 0.287861821 | 0.441996524 | -6.52126099 | ns |
| CLU       | -0.00680118 | 0.027943405 | -1.06276915 | 0.287903216 | 0.441996524 | -6.53452652 | ns |
| PDLIM5    | 0.025408434 | -0.09499585 | 1.062217183 | 0.288153626 | 0.442102376 | -6.53609618 | ns |
| KLK13     | -0.00992054 | -0.01980778 | -1.06195118 | 0.288274974 | 0.442102376 | -6.51933335 | ns |
| CUZD1     | 0.007882521 | 0.048279027 | 1.058404436 | 0.289888012 | 0.44432875  | -6.52576142 | ns |
| SPTBN2    | -0.00681746 | 0.035285245 | -1.05809074 | 0.290031027 | 0.44432875  | -6.52675029 | ns |
| IL33      | -0.00876154 | -0.01659228 | -1.05729157 | 0.290395447 | 0.444653752 | -6.52712452 | ns |
| CCL4      | -0.01511363 | 0.017137481 | -1.05441579 | 0.291709191 | 0.446278893 | -6.53839928 | ns |
| FCRL2     | -0.01100785 | 0.008403667 | -1.05379211 | 0.291994529 | 0.446278893 | -6.54465678 | ns |
| COL28A1   | -0.01584767 | 0.109267738 | -1.05365999 | 0.292055457 | 0.446278893 | -6.53073701 | ns |

|           |             |             |             |             |             |              |    |
|-----------|-------------|-------------|-------------|-------------|-------------|--------------|----|
| RANBP1    | -0.01133625 | 0.010970865 | -1.05363239 | 0.292068138 | 0.446278893 | -6.53049658  | ns |
| NUDT15    | -0.01088599 | 0.061754334 | -1.05274014 | 0.292477027 | 0.446669936 | -6.5305031   | ns |
| CD3G      | 0.019311845 | 0.247847091 | 1.050191284 | 0.293647055 | 0.448222374 | -6.53282204  | ns |
| NUB1      | -0.01893721 | 0.044894868 | -1.04882667 | 0.294274419 | 0.4489453   | -6.54521487  | ns |
| CHM       | -0.012817   | 0.04361748  | -1.04671636 | 0.295247154 | 0.450194093 | -6.53797864  | ns |
| IL4       | -0.02017723 | -0.15304078 | -1.04589339 | 0.295626991 | 0.450430255 | -6.53902779  | ns |
| LRP2      | 0.00756662  | 0.008463945 | 1.045712423 | 0.295710547 | 0.450430255 | -6.5390217   | ns |
| RNASE10   | -0.01006552 | -0.00605866 | -1.04462474 | 0.296213186 | 0.450960638 | -6.53988129  | ns |
| PITHD1    | 0.01697421  | 0.174158417 | 1.043616569 | 0.296679658 | 0.451435435 | -6.5372595   | ns |
| IVD       | -0.01105539 | -0.00277769 | -1.04294633 | 0.296989883 | 0.451594062 | -6.54188848  | ns |
| FXYS5     | -0.01452921 | 0.054979395 | -1.04272316 | 0.297093217 | 0.451594062 | -6.54231558  | ns |
| LILRA3    | 0.029099446 | -0.39521281 | 1.041344225 | 0.297732078 | 0.452189008 | -6.5567199   | ns |
| INPL1     | -0.02203342 | -0.01308788 | -1.04121046 | 0.297794336 | 0.452189008 | -6.55062814  | ns |
| BPIFB1    | 0.014555604 | -0.01802848 | 1.040605769 | 0.298075045 | 0.452380007 | -6.54977808  | ns |
| COL3A1    | 0.004733663 | -0.00211634 | 1.037674547 | 0.299437804 | 0.454212149 | -6.56050885  | ns |
| RRAS      | -0.02719913 | 0.130325547 | -1.0367263  | 0.299880015 | 0.454250213 | -6.54831345  | ns |
| TSHB      | -0.01729842 | 0.028700225 | -1.03643679 | 0.300014784 | 0.454250213 | -6.5558422   | ns |
| UFD1      | -0.02921723 | -0.07061145 | -1.03619083 | 0.300129328 | 0.454250213 | -6.56110061  | ns |
| TJAP1     | -0.01870555 | 0.026097169 | -1.0358967  | 0.300266567 | 0.454250213 | -6.56055013  | ns |
| TFAP2A    | -0.0126738  | 0.062959625 | -1.03571709 | 0.300350756 | 0.454250213 | -6.55001138  | ns |
| CPA2      | -0.01439127 | 0.031789948 | -1.03561869 | 0.300396288 | 0.454250213 | -6.56156966  | ns |
| NOTCH2    | 0.004323838 | 0.0187563   | 1.032232877 | 0.30197916  | 0.456407426 | -6.56610276  | ns |
| CD33      | -0.01785449 | -0.21778005 | -1.03132879 | 0.30240282  | 0.456811296 | -6.56523964  | ns |
| BTNL10    | 0.008122888 | 0.049262722 | 1.027931731 | 0.303998492 | 0.458984279 | -6.55492467  | ns |
| FCRLB     | -0.01306147 | 0.046436327 | -1.02586582 | 0.304971334 | 0.46021514  | -6.55919377  | ns |
| LAMB1     | -0.00619544 | -0.02319061 | -1.02162007 | 0.306977146 | 0.462773785 | -6.56348334  | ns |
| DCTN1     | -0.014557   | 0.000973225 | -1.02160494 | 0.306983843 | 0.462773785 | -6.057893339 | ns |
| DCUN1D1   | -0.01565866 | 0.195712265 | -1.01972432 | 0.307875584 | 0.463532376 | -6.56633388  | ns |
| SEPTIN9   | -0.00632135 | 0.026481088 | -1.01946808 | 0.307996921 | 0.463532376 | -6.57287727  | ns |
| SPARCL1   | 0.006089478 | 0.006737745 | 1.019232265 | 0.308108839 | 0.463532376 | -6.57302203  | ns |
| CETN2     | -0.01489467 | 0.059669333 | -1.01920496 | 0.308122035 | 0.463532376 | -6.56619819  | ns |
| CPXM1     | -0.01501193 | -0.0013521  | -1.01586721 | 0.309708548 | 0.465497899 | -6.58095904  | ns |
| FOXJ3     | -0.00907001 | 0.039407395 | -1.01578652 | 0.309747403 | 0.465497899 | -6.56811502  | ns |
| PDE4D     | -0.01238456 | 0.136357609 | -1.01494468 | 0.310148533 | 0.465860965 | -6.56930653  | ns |
| CCL8      | -0.01339851 | -0.08009675 | -1.01350495 | 0.310834852 | 0.466651809 | -6.5865623   | ns |
| NUBP1     | -0.02051755 | 0.132931119 | -1.0130034  | 0.3110744   | 0.466771453 | -6.58503436  | ns |
| CYB5A     | -0.01463009 | 0.073296799 | -1.01218488 | 0.311465964 | 0.46711896  | -6.57087568  | ns |
| RBM17     | -0.01533382 | 0.027297952 | -1.00950822 | 0.312746697 | 0.46879895  | -6.59032826  | ns |
| C1QL2     | 0.008511123 | 0.037425956 | 1.008995984 | 0.312992798 | 0.468927126 | -6.57494199  | ns |
| SHMT1     | -0.01874818 | -0.02802833 | -1.00416354 | 0.31531559  | 0.472164884 | -6.59097517  | ns |
| FCGR2A    | -0.01336278 | -0.16488572 | -1.00370041 | 0.315539012 | 0.472257261 | -6.58592097  | ns |
| AGR2      | 0.021241874 | -0.02632782 | 1.000745856 | 0.316965858 | 0.474149747 | -6.5822177   | ns |
| NFATC1    | -0.02104862 | 0.017820846 | -1.00007934 | 0.317287883 | 0.474388437 | -6.59481511  | ns |
| ACP6      | -0.01474499 | -0.13529999 | -0.99893101 | 0.31784371  | 0.474976271 | -6.6008546   | ns |
| OMP       | -0.00975268 | 0.061522709 | -0.99747805 | 0.318548531 | 0.475786041 | -6.58861647  | ns |
| ROR1      | 0.006556208 | -0.00128194 | 0.997121134 | 0.318721476 | 0.475800977 | -6.59554492  | ns |
| MMP3      | -0.01009249 | 0.007562566 | -0.99604554 | 0.319243702 | 0.476337051 | -6.5990949   | ns |
| CD276     | -0.00730062 | -0.04616761 | -0.99369808 | 0.320385566 | 0.477350007 | -6.5990651   | ns |
| SUSD1     | -0.01040277 | -0.0524417  | -0.99367798 | 0.320395625 | 0.477350007 | -6.59213605  | ns |
| CDKN2D    | 0.020344489 | -0.14583199 | 0.993641766 | 0.320413019 | 0.477350007 | -6.59869553  | ns |
| HNF1A     | -0.01457804 | 0.140364752 | -0.99098639 | 0.321708091 | 0.479034995 | -6.59436628  | ns |
| RTN4IP1   | -0.01799227 | -0.01789122 | -0.98887142 | 0.322741466 | 0.480328787 | -6.61080976  | ns |
| ABHD14B   | -0.01212581 | 0.007687654 | -0.98835205 | 0.322995959 | 0.480405097 | -6.60209544  | ns |
| CDKL5     | 0.010468588 | 0.076932762 | 0.988095399 | 0.323121784 | 0.480405097 | -6.5978671   | ns |
| COL24A1   | -0.01084333 | -0.05964221 | -0.98764841 | 0.323340323 | 0.480485365 | -6.60989005  | ns |
| SIGLEC15  | -0.01693226 | 0.215549695 | -0.9871417  | 0.323589028 | 0.480610357 | -6.59814069  | ns |
| FAM171A2  | 0.031473504 | 0.39026599  | 0.986654375 | 0.323827482 | 0.480705001 | -6.61298497  | ns |
| EPHX2     | -0.01288634 | 0.095137112 | -0.98634028 | 0.323982001 | 0.480705001 | -6.59935025  | ns |
| MAMDC4    | -0.01073859 | 0.011583313 | -0.98352191 | 0.325366037 | 0.482513371 | -6.61426615  | ns |
| GABARAP   | 0.00936002  | 0.031043897 | 0.982831066 | 0.325705979 | 0.482772314 | -6.61494079  | ns |
| SERPINA11 | 0.008618242 | -0.04257808 | 0.980285377 | 0.32696056  | 0.484386015 | -6.61901358  | ns |
| IL22RA1   | 0.009130198 | 0.035876052 | 0.977583796 | 0.328295869 | 0.486117616 | -6.60766125  | ns |
| ITM2A     | -0.01247784 | -0.00060033 | -0.97688553 | 0.328641228 | 0.486382354 | -6.61758622  | ns |
| PVALB     | 0.024095504 | -0.19307949 | 0.976393662 | 0.328884709 | 0.486496125 | -6.62157991  | ns |
| PPP1R2    | -0.01676015 | -0.00658199 | -0.9744515  | 0.329847809 | 0.487673723 | -6.61774003  | ns |
| EVPL      | 0.006483654 | 0.029015047 | 0.974024024 | 0.330060043 | 0.487740549 | -6.61687634  | ns |

|           |             |             |             |             |             |             |    |
|-----------|-------------|-------------|-------------|-------------|-------------|-------------|----|
| LRRN1     | 0.008267811 | 0.029754759 | 0.970863279 | 0.331631911 | 0.489815468 | -6.61416328 | ns |
| RFC4      | -0.00417724 | 0.007016726 | -0.96864946 | 0.332735279 | 0.49119667  | -6.62868507 | ns |
| SERPINA9  | 0.01478502  | 0.001594051 | 0.967382027 | 0.333368473 | 0.491882739 | -6.62168749 | ns |
| L1CAM     | 0.005924528 | -0.02232053 | 0.966935261 | 0.333591547 | 0.491963291 | -6.62914232 | ns |
| GMPR      | -0.01049398 | -0.0478651  | -0.96642178 | 0.333848215 | 0.492093279 | -6.6329642  | ns |
| PBK       | 0.005926073 | -0.00099361 | 0.965778624 | 0.334170513 | 0.492319828 | -6.61645167 | ns |
| FASLG     | 0.007756146 | 0.042671887 | 0.963600241 | 0.335261387 | 0.493677887 | -6.63566875 | ns |
| TSPYL1    | -0.00777394 | 0.030297154 | -0.96106165 | 0.336536626 | 0.495305921 | -6.62183115 | ns |
| TK1       | -0.00872097 | 0.034499433 | -0.95947097 | 0.33733673  | 0.495910454 | -6.63084937 | ns |
| RAB3GAP1  | -0.01119794 | 0.078988306 | -0.95934594 | 0.337399883 | 0.495910454 | -6.62566775 | ns |
| FUT3_FUT5 | -0.00928798 | -0.02595265 | -0.95923193 | 0.337456874 | 0.495910454 | -6.63963866 | ns |
| S100A16   | -0.01286014 | 0.050048385 | -0.95680523 | 0.338680946 | 0.497458935 | -6.62673537 | ns |
| STAMPB    | -0.01348536 | 0.012628826 | -0.95561282 | 0.339283048 | 0.49809276  | -6.63369966 | ns |
| ARL13B    | -0.01359243 | 0.079931612 | -0.9548626  | 0.339662542 | 0.498321588 | -6.62807139 | ns |
| FGFBP1    | 0.006476411 | 0.004076195 | 0.95439762  | 0.339897356 | 0.498321588 | -6.64110545 | ns |
| GNF       | -0.01347318 | 0.031629852 | -0.95405887 | 0.340069174 | 0.498321588 | -6.62978806 | ns |
| ITGAX     | -0.01028087 | 0.048829583 | -0.95366768 | 0.340266983 | 0.498321588 | -6.63636271 | ns |
| KIR2DS4   | -0.03290617 | 0.940693841 | -0.9534242  | 0.340390087 | 0.498321588 | -6.64288184 | ns |
| CD86      | -0.00543787 | -0.00165069 | -0.95328051 | 0.340462866 | 0.498321588 | -6.6430179  | ns |
| TNFSF10   | -0.00531135 | -0.01090176 | -0.94983668 | 0.342210022 | 0.500527844 | -6.64874824 | ns |
| PLXNB3    | -0.00958756 | 0.018616671 | -0.94954011 | 0.342361041 | 0.500527844 | -6.6394313  | ns |
| PLPBP     | -0.01388224 | 0.002447923 | -0.9492972  | 0.342484463 | 0.500527844 | -6.64177047 | ns |
| CLPS      | 0.01391698  | 0.003085875 | 0.948752589 | 0.342761414 | 0.500682005 | -6.64374469 | ns |
| RAB11FIP3 | -0.02073265 | -0.04093516 | -0.94676479 | 0.343773419 | 0.501674878 | -6.65050676 | ns |
| CLSTN1    | 0.01054439  | 0.03174935  | 0.946743389 | 0.343784737 | 0.501674878 | -6.63693349 | ns |
| FUT1      | 0.012083004 | 0.076210297 | 0.944407296 | 0.344976525 | 0.503162564 | -6.64458197 | ns |
| MICALL2   | -0.01360083 | 0.130576645 | -0.94255169 | 0.345925325 | 0.504294533 | -6.64086774 | ns |
| GLI2      | 0.006324765 | 0.027447968 | 0.940565263 | 0.346942801 | 0.505525438 | -6.64118429 | ns |
| WAS       | -0.01357779 | 0.044807297 | -0.93890039 | 0.347796899 | 0.50651718  | -6.6444732  | ns |
| JPT2      | -0.0164931  | -0.03595741 | -0.93720413 | 0.348668202 | 0.507532976 | -6.65811152 | ns |
| GGACT     | -0.01336858 | 0.024296281 | -0.93679146 | 0.348880444 | 0.507588887 | -6.65983627 | ns |
| MARS1     | -0.01615546 | -0.01219094 | -0.93642627 | 0.349068718 | 0.507609889 | -6.64602045 | ns |
| PPIE      | 0.011515929 | 0.125400629 | 0.935247246 | 0.349675687 | 0.508239426 | -6.65364124 | ns |
| CAPS      | -0.01752722 | 0.183919936 | -0.93488447 | 0.349862405 | 0.508257822 | -6.66136212 | ns |
| PADI2     | -0.01168846 | 0.060466111 | -0.93449878 | 0.350061602 | 0.50829432  | -6.64856771 | ns |
| CCL11     | 0.007735892 | -0.02863414 | 0.933600912 | 0.350524307 | 0.508713209 | -6.66393521 | ns |
| PRL       | 0.014472662 | 0.108852202 | 0.931204727 | 0.351762169 | 0.510163514 | -6.66595269 | ns |
| TEK       | 0.004212565 | 0.00625458  | 0.930990469 | 0.351873054 | 0.510163514 | -6.66302221 | ns |
| CIRBP     | -0.01795089 | -0.07475311 | -0.93055734 | 0.352097117 | 0.510235029 | -6.66427699 | ns |
| FGF7      | -0.01502673 | 0.183344146 | -0.92847113 | 0.353178152 | 0.511480327 | -6.65154116 | ns |
| VPS53     | -0.01575927 | 0.062721379 | -0.92822254 | 0.353306787 | 0.511480327 | -6.66113046 | ns |
| GUCY2C    | -0.01539072 | 0.227597508 | -0.92573063 | 0.354600617 | 0.513044161 | -6.6624359  | ns |
| DYNC1H1   | 0.008863969 | 0.047359834 | 0.92546524  | 0.354738411 | 0.513044161 | -6.66930745 | ns |
| TDGF1     | 0.028848903 | 0.194851732 | 0.924292658 | 0.355348765 | 0.513672473 | -6.65779144 | ns |
| GNPDA1    | -0.00599079 | 0.029462089 | -0.92010539 | 0.357532409 | 0.516573297 | -6.66135839 | ns |
| EIF4E     | -0.01672193 | 0.016366396 | -0.91870675 | 0.358263715 | 0.51729432  | -6.66136393 | ns |
| MYCBP2    | -0.0125228  | 0.084376171 | -0.91847262 | 0.358385757 | 0.51729432  | -6.67749634 | ns |
| DAND5     | 0.010483297 | -0.02889761 | 0.916205165 | 0.359573992 | 0.518620072 | -6.66364312 | ns |
| FGF3      | -0.00565773 | 0.022298657 | -0.91583077 | 0.35977035  | 0.518620072 | -6.6639837  | ns |
| PNLIPRP1  | 0.013883681 | -0.00369922 | 0.915702731 | 0.359837078 | 0.518620072 | -6.6789915  | ns |
| HARS1     | -0.01529189 | -0.01981114 | -0.91189637 | 0.361837573 | 0.521246035 | -6.67882669 | ns |
| PALLD     | 0.007385068 | 0.043042615 | 0.911413777 | 0.362092009 | 0.521355358 | -6.66799121 | ns |
| TOP1MT    | -0.00913933 | 0.038744892 | -0.910443   | 0.362603537 | 0.521617755 | -6.6680022  | ns |
| MORN4     | -0.01441315 | 0.11814595  | -0.90990259 | 0.362888483 | 0.521617755 | -6.66849066 | ns |
| ADD1      | -0.013069   | 0.017132858 | -0.90977062 | 0.362957971 | 0.521617755 | -6.67156723 | ns |
| GCLM      | -0.00837409 | 0.058291975 | -0.90971239 | 0.362988794 | 0.521617755 | -6.66987285 | ns |
| CACNB3    | -0.01533877 | -0.01162826 | -0.90735742 | 0.364231904 | 0.523146661 | -6.6875755  | ns |
| PDE5A     | -0.01904174 | -0.10372039 | -0.90518292 | 0.365382886 | 0.524346236 | -6.67570174 | ns |
| IL17D     | -0.00657109 | 0.000777489 | -0.90510117 | 0.365426229 | 0.524346236 | -6.67542094 | ns |
| ENTPD6    | -0.00547584 | -0.04582874 | -0.9046379  | 0.365671713 | 0.524440767 | -6.67606558 | ns |
| PPME1     | -0.01203334 | -0.01763579 | -0.90393113 | 0.366046156 | 0.524720067 | -6.68323171 | ns |
| ANP32C    | 0.007559279 | 0.067964884 | 0.903389567 | 0.366333607 | 0.524874452 | -6.67649369 | ns |
| CA11      | 0.005943099 | 0.047150199 | 0.901863601 | 0.367143769 | 0.525777246 | -6.67788849 | ns |
| PAFAH2    | -0.00905987 | 0.031797092 | -0.89975441 | 0.368265155 | 0.527124633 | -6.68598371 | ns |
| PECAM1    | -0.00582885 | -0.00117818 | -0.89832158 | 0.369028205 | 0.52781419  | -6.69103016 | ns |
| TWF2      | -0.01523753 | 0.016038867 | -0.89817089 | 0.369108416 | 0.52781419  | -6.69462854 | ns |

|          |             |              |             |             |             |             |    |
|----------|-------------|--------------|-------------|-------------|-------------|-------------|----|
| SNX5     | -0.00532652 | 0.045764639  | -0.89664667 | 0.369921802 | 0.528478466 | -6.68252049 | ns |
| PEPD     | 0.004660827 | -0.00093538  | 0.896621386 | 0.369934926 | 0.528478466 | -6.69525384 | ns |
| GPIHBP1  | -0.01259387 | -0.08396748  | -0.89543914 | 0.370566324 | 0.529121598 | -6.6961238  | ns |
| SYNGAP1  | 0.010355381 | 0.080529715  | 0.894461176 | 0.37108947  | 0.529453659 | -6.68539475 | ns |
| FHIT     | -0.01428996 | -0.02496578  | -0.89432648 | 0.371161521 | 0.529453659 | -6.6848518  | ns |
| FGF16    | -0.00851279 | 0.023372222  | -0.89338345 | 0.371666164 | 0.529914648 | -6.68414906 | ns |
| IL21R    | -0.00956225 | 0.098147031  | -0.89284829 | 0.371952709 | 0.529942687 | -6.6846237  | ns |
| SUGP1    | -0.00736168 | 0.04969054   | -0.89266815 | 0.372048804 | 0.529942687 | -6.69858453 | ns |
| ATP6V1G1 | -0.01311101 | 0.034673694  | -0.89230823 | 0.372241983 | 0.529959332 | -6.68637432 | ns |
| GIMAP7   | -0.00547036 | 0.012774345  | -0.89091551 | 0.372988649 | 0.530763575 | -6.68842621 | ns |
| CREBZF   | 0.004679518 | 0.007433767  | 0.889993615 | 0.373483566 | 0.531208968 | -6.68628338 | ns |
| MTHFD2   | 0.004565217 | 0.013441766  | 0.888418875 | 0.374329262 | 0.531871383 | -6.70343776 | ns |
| SNAP23   | -0.0168253  | -0.11194088  | -0.88815821 | 0.374469609 | 0.531871383 | -6.6975582  | ns |
| IL1R2    | -0.00371612 | -0.01122243  | -0.88810965 | 0.374495741 | 0.531871383 | -6.69638481 | ns |
| DHPS     | -0.00731699 | 0.015589513  | -0.88764185 | 0.374747252 | 0.531924631 | -6.70336552 | ns |
| C1QBP    | -0.01213795 | 0.112604731  | -0.8873624  | 0.374897565 | 0.531924631 | -6.70539787 | ns |
| PMS1     | -0.00912954 | 0.028484365  | -0.88680651 | 0.375197192 | 0.53209121  | -6.69150453 | ns |
| MRPL46   | -0.00506404 | 0.007839907  | -0.88601927 | 0.375621282 | 0.53243405  | -6.6921956  | ns |
| DDHD2    | -0.01192766 | 0.006013636  | -0.88487684 | 0.376236764 | 0.533041587 | -6.7075856  | ns |
| WASF1    | -0.01791207 | 0.084448294  | -0.88454725 | 0.376414984 | 0.533041587 | -6.69391455 | ns |
| PARD3    | -0.01313878 | 0.088625529  | -0.88411264 | 0.376649335 | 0.53311491  | -6.69983996 | ns |
| TGFBR1   | 0.003897373 | 0.001379211  | 0.882597673 | 0.377467797 | 0.534014519 | -6.6936604  | ns |
| RLN1     | -0.01275557 | 0.178978     | -0.88098363 | 0.378340323 | 0.534888687 | -6.71099999 | ns |
| NFASC    | 0.005045928 | -0.0135977   | 0.880565533 | 0.378566645 | 0.534888687 | -6.7117202  | ns |
| HEPH     | 0.004743595 | -0.01941702  | 0.880438913 | 0.378635245 | 0.534888687 | -6.710695   | ns |
| MTR      | 0.011438388 | 0.098553785  | 0.879485139 | 0.379152346 | 0.535360179 | -6.69672696 | ns |
| TPPP3    | 0.007468028 | 0.026668434  | 0.878055504 | 0.379927599 | 0.536017317 | -6.69917145 | ns |
| MSLNL    | 0.00650298  | 0.029639386  | 0.877949869 | 0.379984879 | 0.536017317 | -6.69926549 | ns |
| AKAP12   | 0.003386397 | 0.01417554   | 0.877327021 | 0.380322956 | 0.536195328 | -6.70035724 | ns |
| NUDC     | -0.01211814 | -0.0570737   | -0.87671814 | 0.380653312 | 0.536195328 | -6.71507803 | ns |
| CDON     | -0.00497162 | -0.01290001  | -0.87670251 | 0.380661957 | 0.536195328 | -6.70911729 | ns |
| RASA1    | -0.00613705 | -0.0007947   | -0.87605977 | 0.381011506 | 0.536428928 | -6.70090974 | ns |
| ZPR1     | 0.016836909 | 0.223972318  | 0.87502444  | 0.381574545 | 0.536860586 | -6.70247272 | ns |
| GP5      | -0.00633693 | -0.03932689  | -0.87481984 | 0.381685814 | 0.536860586 | -6.70253858 | ns |
| VASH1    | -0.0152266  | 0.036014577  | -0.87379594 | 0.382243069 | 0.537385537 | -6.71233265 | ns |
| TSPAN15  | -0.00876247 | 0.077819981  | -0.87324869 | 0.382541488 | 0.537546268 | -6.70215456 | ns |
| GID8     | 0.005871101 | 0.040262802  | 0.872761107 | 0.382806802 | 0.537660348 | -6.71816174 | ns |
| HIP1     | -0.0059116  | 0.038352973  | -0.87202956 | 0.383206181 | 0.537962523 | -6.70321107 | ns |
| AXIN1    | -0.01806293 | -0.02693033  | -0.871213   | 0.383651492 | 0.538328859 | -6.71457101 | ns |
| SIRT2    | -0.01683469 | -0.02350642  | -0.87026211 | 0.384170834 | 0.538641052 | -6.71289606 | ns |
| ARHGAP25 | -0.01122609 | 0.061211885  | -0.87013061 | 0.384242915 | 0.538641052 | -6.70580964 | ns |
| NUMB     | -0.01475171 | -0.0424034   | -0.86776849 | 0.385534931 | 0.539987477 | -6.70654879 | ns |
| CDK5RAP3 | -0.01041361 | 0.097683472  | -0.86746352 | 0.385701501 | 0.539987477 | -6.72274034 | ns |
| KYAT1    | -0.01053862 | 0.009767978  | -0.86736043 | 0.385758177 | 0.539987477 | -6.71471509 | ns |
| DTD1     | -0.01515029 | 0.014357312  | -0.86586914 | 0.386575645 | 0.540872489 | -6.71027507 | ns |
| CACYBP   | -0.01796021 | -0.06890145  | -0.86543019 | 0.386816454 | 0.540950213 | -6.70954067 | ns |
| CADPS    | -0.00746685 | 0.059040309  | -0.86395347 | 0.38762716  | 0.54165215  | -6.71137155 | ns |
| TSPAN7   | -0.01692896 | 0.292569993  | -0.86384027 | 0.387689381 | 0.54165215  | -6.71212958 | ns |
| GSTP1    | 0.012456859 | 0.065066671  | 0.861813201 | 0.388804074 | 0.542949735 | -6.7119505  | ns |
| REG1B    | 0.010213423 | 0.042539651  | 0.860473837 | 0.389541199 | 0.543719073 | -6.7285454  | ns |
| SCGB1A1  | -0.00998112 | -0.03176435  | -0.86001051 | 0.389796681 | 0.543815723 | -6.72363895 | ns |
| MPIG6B   | -0.01423208 | -0.16822671  | -0.85929667 | 0.39019025  | 0.544104838 | -6.72503741 | ns |
| GLP1R    | 0.006301237 | 0.040982294  | 0.854861712 | 0.392641292 | 0.547261371 | -6.71979215 | ns |
| HSD17B3  | -0.00824744 | 0.038744087  | -0.85388521 | 0.393182203 | 0.547753833 | -6.71876056 | ns |
| KLK10    | -0.00715171 | -0.01359044  | -0.84807046 | 0.396411915 | 0.551964286 | -6.73515725 | ns |
| PRSS22   | -0.00566325 | 0.007900904  | -0.84776463 | 0.396582559 | 0.551964286 | -6.72358867 | ns |
| TMED4    | 0.009588935 | 0.08490461   | 0.84648636  | 0.397294955 | 0.552692363 | -6.72500746 | ns |
| MFAP3    | 0.008825494 | 0.035822233  | 0.844265145 | 0.398534664 | 0.554152961 | -6.72849458 | ns |
| NFU1     | -0.01727879 | -0.04513239  | -0.84341177 | 0.399011235 | 0.55455155  | -6.74105315 | ns |
| KIR3DL1  | -0.0222394  | 8.5951209784 | -0.84292475 | 0.399283931 | 0.554666546 | -6.72895136 | ns |
| IL3RA    | -0.00566543 | -0.01526634  | -0.84137874 | 0.400149109 | 0.555604088 | -6.73068201 | ns |
| CDA      | -0.00807097 | 0.005324099  | -0.84066236 | 0.400550127 | 0.555896564 | -6.74357047 | ns |
| ACRV1    | 0.01246352  | 0.3736473    | 0.839511702 | 0.401195574 | 0.556313172 | -6.73050298 | ns |
| UNC79    | -0.00956802 | 0.06290999   | -0.83944794 | 0.40123135  | 0.556313172 | -6.7296882  | ns |
| POF1B    | -0.00734662 | 0.042908855  | -0.83856954 | 0.401724241 | 0.556732218 | -6.73128803 | ns |
| VIPR1    | 0.004002655 | 0.008147347  | 0.836734574 | 0.402755041 | 0.557895977 | -6.73408722 | ns |



|           |             |             |             |             |             |             |    |
|-----------|-------------|-------------|-------------|-------------|-------------|-------------|----|
| ATF2      | -0.01261902 | 0.154533829 | -0.83636066 | 0.402965297 | 0.557922555 | -6.734666   | ns |
| CD164L2   | -0.00609923 | 0.023539022 | -0.83333677 | 0.404667991 | 0.559927328 | -6.73717501 | ns |
| CCS       | -0.00847055 | 0.028143193 | -0.83310813 | 0.404796777 | 0.559927328 | -6.74377028 | ns |
| LMOD2     | 0.010811011 | 0.087807676 | 0.832587325 | 0.405090696 | 0.560068576 | -6.73845612 | ns |
| SKIV2L    | -0.00649846 | 0.03970892  | -0.83107784 | 0.405942859 | 0.560962406 | -6.73784249 | ns |
| ATXN2L    | -0.00796488 | 0.064236122 | -0.83076104 | 0.406121413 | 0.560962406 | -6.75369599 | ns |
| AIDA      | -0.01464814 | 0.179887789 | -0.82944712 | 0.406864543 | 0.561652234 | -6.74038653 | ns |
| MSRA      | -0.01302271 | -0.01907864 | -0.82881484 | 0.407222007 | 0.561652234 | -6.75232032 | ns |
| TET2      | 0.016836966 | 0.202701237 | 0.828691609 | 0.407291913 | 0.561652234 | -6.74607878 | ns |
| TMEM106A  | -0.01161002 | 0.019383319 | -0.82851762 | 0.407390216 | 0.561652234 | -6.75375752 | ns |
| TMED1     | 0.009030241 | 0.028285274 | 0.827361214 | 0.408045289 | 0.561967955 | -6.74807317 | ns |
| WIF1      | 0.006109785 | 0.005403827 | 0.827136841 | 0.408172221 | 0.561967955 | -6.75748955 | ns |
| MILR1     | -0.00903419 | 0.004733664 | -0.82709446 | 0.408196587 | 0.561967955 | -6.74251632 | ns |
| TPRKB     | 0.010634507 | 0.082619474 | 0.826041375 | 0.408793739 | 0.562524844 | -6.74077507 | ns |
| CORO6     | 0.006076871 | 0.031450729 | 0.825444092 | 0.40913257  | 0.562725909 | -6.74433719 | ns |
| LXN       | -0.01146381 | 0.101115315 | -0.82421069 | 0.4098328   | 0.563072845 | -6.74838489 | ns |
| CNPY4     | -0.01353218 | -0.02078161 | -0.82407073 | 0.409912219 | 0.563072845 | -6.75176164 | ns |
| RTKN2     | 0.008464739 | 0.068110995 | 0.823981203 | 0.409963311 | 0.563072845 | -6.74367456 | ns |
| NRP2      | 0.005051894 | -0.00977445 | 0.823503882 | 0.410234289 | 0.563180124 | -6.75500582 | ns |
| IL17A     | -0.00754815 | 0.032403889 | -0.82259692 | 0.410750237 | 0.563623445 | -6.74620053 | ns |
| FKBP14    | -0.01642653 | -0.03884897 | -0.82048501 | 0.41195227  | 0.564995537 | -6.76212328 | ns |
| TNFRSF11B | -0.00503767 | -0.02346092 | -0.82016088 | 0.412137156 | 0.564995537 | -6.7553802  | ns |
| MERTK     | -0.00441975 | -0.01656015 | -0.81943576 | 0.412550414 | 0.565296673 | -6.76333254 | ns |
| GLRX5     | -0.01439075 | 0.00724146  | -0.81891644 | 0.412846973 | 0.565437692 | -6.74955514 | ns |
| MGMT      | 0.021785486 | -0.18246909 | 0.818419386 | 0.413130465 | 0.565560693 | -6.75887003 | ns |
| PTH       | -0.01311802 | -0.00385061 | -0.81775614 | 0.413509338 | 0.565814089 | -6.74994884 | ns |
| CDH4      | 0.00773112  | 0.042352424 | 0.816028666 | 0.414496631 | 0.566899374 | -6.75201155 | ns |
| SARG      | -0.01812702 | -0.06807593 | -0.81543392 | 0.414836574 | 0.567098687 | -6.76323272 | ns |
| RBM19     | -0.00774734 | 0.061012731 | -0.81385877 | 0.415738753 | 0.568066055 | -6.75190673 | ns |
| MAX       | -0.01849872 | -0.00364015 | -0.8128561  | 0.416313408 | 0.568386191 | -6.75391439 | ns |
| MORF4L2   | -0.00630779 | 0.058965624 | -0.81277082 | 0.41636235  | 0.568386191 | -6.7515737  | ns |
| PIK3AP1   | -0.01083105 | 0.0190266   | -0.81209208 | 0.416751397 | 0.568651438 | -6.7639935  | ns |
| PRKG1     | -0.02081245 | -0.03720489 | -0.81151863 | 0.417080651 | 0.56883489  | -6.75554442 | ns |
| CD69      | -0.01533553 | -0.07174419 | -0.81036286 | 0.417744332 | 0.569474066 | -6.75959364 | ns |
| TAP1      | -0.00967246 | 0.077547711 | -0.80976201 | 0.418089592 | 0.569678772 | -6.76238105 | ns |
| SH2B3     | -0.01707504 | -0.04187252 | -0.80836176 | 0.418895143 | 0.570510176 | -6.75729117 | ns |
| RBPM5     | -0.01071675 | 0.131082483 | -0.80752677 | 0.419375833 | 0.570826628 | -6.75666098 | ns |
| TGM2      | -0.01344937 | 0.029870414 | -0.80726993 | 0.419523552 | 0.570826628 | -6.76441773 | ns |
| MITD1     | -0.01717836 | -0.07896957 | -0.80693941 | 0.419713962 | 0.570826628 | -6.76508318 | ns |
| RCOR1     | -0.00774494 | 0.070401337 | -0.8058849  | 0.42032194  | 0.571387367 | -6.75994297 | ns |
| GPA33     | -0.02386066 | 0.084181281 | -0.80429973 | 0.421236391 | 0.572077825 | -6.76774945 | ns |
| DDX25     | -0.00606476 | 0.03802396  | -0.80399131 | 0.421414638 | 0.572077825 | -6.76103343 | ns |
| TP53      | -0.00745215 | -0.00850661 | -0.80398628 | 0.421417604 | 0.572077825 | -6.76079423 | ns |
| PHYKPL    | 0.006756922 | -0.02113701 | 0.803599178 | 0.42164111  | 0.57211526  | -6.7618958  | ns |
| LILRA4    | 0.008240175 | 0.083317148 | 0.802716051 | 0.422151564 | 0.572541834 | -6.760851   | ns |
| PCSK7     | -0.00736236 | 0.031842952 | -0.80158939 | 0.422802844 | 0.573158916 | -6.77555792 | ns |
| CTSV      | 0.007005001 | 0.03414461  | 0.800912149 | 0.423194813 | 0.573323872 | -6.77673933 | ns |
| PRKAR1A   | -0.01449278 | -0.03534093 | -0.80070096 | 0.423317215 | 0.573323872 | -6.7709076  | ns |
| ZCCHC8    | -0.0096735  | 0.078328402 | -0.79907441 | 0.424259893 | 0.57394004  | -6.76374742 | ns |
| ENSA      | -0.00829268 | 0.040915338 | -0.79877708 | 0.42443196  | 0.57394004  | -6.77779316 | ns |
| IGLON5    | 0.014730435 | 0.259901331 | 0.798711082 | 0.424470586 | 0.57394004  | -6.76282372 | ns |
| ACOX1     | -0.00839964 | 0.023873932 | -0.7985593  | 0.424558385 | 0.57394004  | -6.7726085  | ns |
| COMT      | -0.014432   | -0.0497991  | -0.79621328 | 0.425920737 | 0.575515295 | -6.76384643 | ns |
| CD93      | 0.005120293 | -0.00281538 | 0.795374081 | 0.426408761 | 0.575795921 | -6.75554477 | ns |
| REEP4     | -0.01018982 | 0.104006957 | -0.79517684 | 0.4265228   | 0.575795921 | -6.78243107 | ns |
| CBLN1     | 0.015286011 | 0.206291956 | 0.793907861 | 0.427261567 | 0.576526698 | -6.76969551 | ns |
| MDM1      | -0.00502097 | 0.006545231 | -0.790832   | 0.429054444 | 0.578678511 | -6.77145448 | ns |
| YY1       | 0.004368791 | 0.011204456 | 0.789576337 | 0.429787683 | 0.578954778 | -6.77089621 | ns |
| GTPBP2    | -0.01285584 | 0.035633194 | -0.78951341 | 0.429824379 | 0.578954778 | -6.77248921 | ns |
| ANKRD54   | -0.01026808 | 0.086611443 | -0.78946265 | 0.429854095 | 0.578954778 | -6.77228577 | ns |
| RAB39B    | -0.0145044  | 0.211991087 | -0.78710505 | 0.431232783 | 0.580543903 | -6.77317461 | ns |
| FOLR3     | 0.032187506 | -2.48704626 | 0.785771467 | 0.432013472 | 0.581043943 | -6.78592447 | ns |
| FOXO1     | -0.01446461 | -0.01779692 | -0.78571454 | 0.432046877 | 0.581043943 | -6.78492408 | ns |
| GPHA2     | -0.00734047 | 0.102839806 | -0.78545107 | 0.43220118  | 0.581043943 | -6.78794061 | ns |
| DDX53     | -0.00573534 | 0.00335894  | -0.78418257 | 0.432945281 | 0.581607098 | -6.77665486 | ns |
| CD3D      | 0.005139023 | 0.032253359 | 0.784057931 | 0.433018435 | 0.581607098 | -6.77741344 | ns |

|          |             |             |             |             |             |             |    |
|----------|-------------|-------------|-------------|-------------|-------------|-------------|----|
| FKBP1B   | 0.018593591 | 0.054004095 | 0.782884274 | 0.433707076 | 0.582035785 | -6.78981093 | ns |
| HMGCS1   | 0.006873048 | 0.023525376 | 0.782835149 | 0.433736256 | 0.582035785 | -6.7765032  | ns |
| LELP1    | -0.011548   | 0.057995305 | -0.78239308 | 0.433995887 | 0.582116669 | -6.77870842 | ns |
| FADD     | -0.01280467 | -0.00390822 | -0.78177837 | 0.434356924 | 0.582333434 | -6.78577819 | ns |
| ATP6V1G2 | -0.01514164 | -0.00683579 | -0.77932097 | 0.435802936 | 0.583918612 | -6.77922909 | ns |
| TSPAN8   | -0.01544689 | -0.01467177 | -0.77908896 | 0.435939238 | 0.583918612 | -6.79288404 | ns |
| CES3     | -0.0121262  | 0.105642    | -0.77666718 | 0.437367165 | 0.585342668 | -6.78944406 | ns |
| LILRB2   | -0.00578768 | -0.05750719 | -0.77660575 | 0.437403323 | 0.585342668 | -6.79343781 | ns |
| EVI5     | -0.01405021 | -0.00236064 | -0.77424127 | 0.438800302 | 0.586943144 | -6.78280394 | ns |
| DBN1     | -0.00818138 | 0.046510328 | -0.77281113 | 0.439646315 | 0.587805513 | -6.78390255 | ns |
| TRPV3    | 0.00771051  | 0.049848417 | 0.770665042 | 0.44091761  | 0.589235433 | -6.78589103 | ns |
| CA4      | 0.003868743 | -0.00525554 | 0.76813158  | 0.44242071  | 0.590973685 | -6.80323606 | ns |
| FAM3B    | 0.005753545 | -0.03352769 | 0.764899718 | 0.444343061 | 0.593270113 | -6.79845259 | ns |
| MAGEA3   | 0.012840337 | -0.08175182 | 0.763212858 | 0.445348255 | 0.594340449 | -6.79874206 | ns |
| ITGB1BP1 | -0.00665799 | -0.01081812 | -0.75988803 | 0.447333427 | 0.596717043 | -6.79503854 | ns |
| BANK1    | -0.01745543 | -0.09860749 | -0.75696629 | 0.44908168  | 0.598775573 | -6.80694885 | ns |
| CX3CL1   | 0.005240545 | 0.008456181 | 0.752216769 | 0.451932305 | 0.602301384 | -6.80745352 | ns |
| ALCAM    | 0.003007159 | -0.00660483 | 0.751424889 | 0.452408389 | 0.60266081  | -6.81584445 | ns |
| LAIR2    | -0.01700555 | -0.13744056 | -0.75024838 | 0.453116683 | 0.603329099 | -6.80892217 | ns |
| SNAPIN   | -0.00874517 | 0.020923945 | -0.74949764 | 0.453568677 | 0.603655668 | -6.81747464 | ns |
| SNED1    | -0.0047498  | 0.001627895 | -0.74875238 | 0.454018148 | 0.603978584 | -6.80335351 | ns |
| ECE1     | 0.005626288 | -0.01220863 | 0.746498298 | 0.455378106 | 0.605196771 | -6.80529551 | ns |
| MAP4K5   | -0.01818014 | -0.05973833 | -0.74644381 | 0.455410879 | 0.605196771 | -6.81049282 | ns |
| CLASP1   | -0.01124395 | 0.108088646 | -0.74620436 | 0.455555652 | 0.605196771 | -6.80310211 | ns |
| PDXDC1   | 0.008277457 | 0.082029105 | 0.745617286 | 0.455910303 | 0.605240011 | -6.80353698 | ns |
| LPO      | -0.00966223 | -0.00400836 | -0.74546449 | 0.456002748 | 0.605240011 | -6.79913238 | ns |
| HMCN2    | 0.008459992 | -0.04793224 | 0.744042738 | 0.456862188 | 0.60610522  | -6.80675584 | ns |
| SLC1A4   | 0.007820534 | 0.083987891 | 0.737885133 | 0.460595709 | 0.610639487 | -6.81164603 | ns |
| CXCL5    | -0.01834365 | -0.08330736 | -0.7377163  | 0.460698216 | 0.610639487 | -6.81707333 | ns |
| IRAK4    | -0.01669226 | -0.12338317 | -0.73734377 | 0.460924598 | 0.610662353 | -6.82151083 | ns |
| MINK1    | -0.01380683 | -0.04931503 | -0.73671643 | 0.461305962 | 0.610679613 | -6.82587881 | ns |
| PPM1A    | 0.005000837 | 0.023008063 | 0.736388528 | 0.461505768 | 0.610679613 | -6.81249826 | ns |
| DDX39A   | -0.00328321 | 0.007271949 | -0.73629112 | 0.461565037 | 0.610679613 | -6.81126834 | ns |
| LPP      | 0.009916575 | 0.01550582  | 0.735523786 | 0.462032035 | 0.610824555 | -6.81217297 | ns |
| BRDT     | -0.00538512 | 0.00774433  | -0.73542371 | 0.462092959 | 0.610824555 | -6.81224606 | ns |
| INSR     | -0.00242287 | 0.002053235 | -0.73328332 | 0.463397079 | 0.612057256 | -6.81346317 | ns |
| CD2      | -0.00553078 | 0.022154011 | -0.73320519 | 0.463444723 | 0.612057256 | -6.81386391 | ns |
| ART5     | 0.009140985 | 0.126352444 | 0.731686611 | 0.464371242 | 0.612747758 | -6.81683114 | ns |
| PLB1     | 0.00876129  | -0.00954359 | 0.731659871 | 0.464387256 | 0.612747758 | -6.82956639 | ns |
| COL9A1   | -0.0070505  | 0.032680861 | -0.73054496 | 0.465068295 | 0.613369206 | -6.82646706 | ns |
| SUSD5    | 0.004905498 | -0.0123051  | 0.723195501 | 0.469571028 | 0.619028172 | -6.81982585 | ns |
| AIF1L    | -0.00842959 | 0.121793856 | -0.72192234 | 0.470353423 | 0.619779781 | -6.82294669 | ns |
| KCNIP4   | 0.007902267 | 0.049283922 | 0.720596875 | 0.471168755 | 0.620574094 | -6.82416459 | ns |
| ANKRA2   | -0.00821511 | 0.03782801  | -0.71995078 | 0.471566501 | 0.620817937 | -6.82221483 | ns |
| SOX2     | 0.003352834 | -0.00078117 | 0.718446608 | 0.472492795 | 0.62175708  | -6.83871468 | ns |
| FAM172A  | -0.00889606 | 0.025463418 | -0.71691295 | 0.473438915 | 0.622721455 | -6.82652571 | ns |
| ARHGEF12 | -0.01610533 | -0.03255201 | -0.71620219 | 0.473877408 | 0.623017573 | -6.83677214 | ns |
| IL20     | -0.0076996  | 0.048024629 | -0.71299063 | 0.475862571 | 0.625345953 | -6.82977593 | ns |
| CHAD     | 0.007174064 | 0.005613369 | 0.709769812 | 0.47785782  | 0.627685485 | -6.83240644 | ns |
| DCUN1D2  | -0.01149327 | 0.144878423 | -0.70709154 | 0.479520559 | 0.629586345 | -6.83132669 | ns |
| FRMD4B   | 0.010229909 | 0.107944685 | 0.702273766 | 0.482519324 | 0.633238843 | -6.83591139 | ns |
| HDAC8    | -0.00889333 | 0.127582516 | -0.70162017 | 0.482926929 | 0.633451996 | -6.83602305 | ns |
| MESD     | -0.01846409 | -0.03171814 | -0.70131734 | 0.483115615 | 0.633451996 | -6.84753275 | ns |
| KLK4     | -0.00893389 | 0.014642121 | -0.70025091 | 0.483781119 | 0.634039887 | -6.853744   | ns |
| LYN      | -0.01303676 | -0.06077442 | -0.69978789 | 0.484070416 | 0.634134417 | -6.84581301 | ns |
| STK4     | -0.01317223 | -0.01258294 | -0.69922245 | 0.484423648 | 0.634312579 | -6.84649592 | ns |
| SHPK     | 0.005874996 | 0.068751513 | 0.696391253 | 0.486194441 | 0.636141232 | -6.84717678 | ns |
| HLA-A    | -0.00455156 | -0.03275361 | -0.69629281 | 0.4862559   | 0.636141232 | -6.85567887 | ns |
| SMC3     | -0.00767359 | 0.048593028 | -0.69564982 | 0.48665892  | 0.636344311 | -6.83929607 | ns |
| BCL2L11  | 0.006542894 | -0.07996345 | 0.695349256 | 0.486846983 | 0.636344311 | -6.85139023 | ns |
| TTF2     | -0.00693485 | 0.04208929  | -0.69475288 | 0.487220864 | 0.636548063 | -6.84232976 | ns |
| PYDC1    | -0.00577982 | 0.02500071  | -0.69417471 | 0.487583344 | 0.636736747 | -6.84245803 | ns |
| REG3G    | 0.00547226  | 0.001160403 | 0.693607406 | 0.487938875 | 0.636916189 | -6.85574292 | ns |
| GPR158   | 0.004846491 | 0.046783736 | 0.691662881 | 0.489159407 | 0.63822407  | -6.85887046 | ns |
| CDAN1    | 0.003174169 | 0.008007341 | 0.690749475 | 0.489733335 | 0.638687512 | -6.85846705 | ns |
| TEX33    | 0.005470655 | 0.043406608 | 0.68774034  | 0.491626759 | 0.640724574 | -6.85312306 | ns |

|           |             |             |             |             |             |             |    |
|-----------|-------------|-------------|-------------|-------------|-------------|-------------|----|
| LDLRAP1   | -0.01344235 | -0.0308755  | -0.68756954 | 0.491734168 | 0.640724574 | -6.86167442 | ns |
| PSMD5     | -0.00764386 | 0.079579642 | -0.68694152 | 0.492130123 | 0.640954487 | -6.84768908 | ns |
| CRADD     | -0.01134869 | -0.01467828 | -0.6863939  | 0.492475198 | 0.64111115  | -6.85322056 | ns |
| ACOT13    | -0.01552999 | -0.05739855 | -0.6858266  | 0.492832743 | 0.64111115  | -6.86073579 | ns |
| GNGT1     | 0.00733245  | 0.068466667 | 0.685705498 | 0.492909355 | 0.64111115  | -6.84853154 | ns |
| RELB      | -0.0067478  | 0.077298736 | -0.68506417 | 0.493313987 | 0.641352111 | -6.84742277 | ns |
| CXCL12    | -0.00579711 | 0.002110372 | -0.68466866 | 0.493563533 | 0.641390972 | -6.84943197 | ns |
| GOPC      | -0.0150137  | -0.06497915 | -0.68406248 | 0.493946043 | 0.641521552 | -6.85912222 | ns |
| GLT8D2    | -0.00678821 | 0.061756019 | -0.68381357 | 0.494103415 | 0.641521552 | -6.84981622 | ns |
| DDX58     | -0.00855183 | 0.063343732 | -0.68275993 | 0.494769066 | 0.642100298 | -6.85028963 | ns |
| IFIT3     | 0.005179085 | 0.031379092 | 0.681158972 | 0.495781237 | 0.643128037 | -6.85759705 | ns |
| VAT1      | -0.00284132 | 0.004499444 | -0.6805943  | 0.496138537 | 0.64330574  | -6.85897035 | ns |
| SHC1      | 0.015653725 | 0.233263641 | 0.67955575  | 0.496796266 | 0.643824196 | -6.85028587 | ns |
| EDIL3     | 0.005276771 | -0.00434516 | 0.679195032 | 0.497024729 | 0.643824196 | -6.85336785 | ns |
| SEMA7A    | -0.00387552 | 0.004378665 | -0.67891822 | 0.49719985  | 0.643824196 | -6.86504762 | ns |
| ATP1B3    | 0.00544794  | 0.053492184 | 0.677942973 | 0.497818286 | 0.644339271 | -6.85258643 | ns |
| EDDM3B    | 0.006977755 | 0.185020185 | 0.677481126 | 0.498110886 | 0.644432338 | -6.86672402 | ns |
| ENTPD5    | 0.003068452 | -0.01061553 | 0.676187623 | 0.498931909 | 0.645128459 | -6.85539193 | ns |
| CASP4     | 0.023092841 | 0.424528505 | 0.675937103 | 0.499090818 | 0.645128459 | -6.86111624 | ns |
| SPINK1    | -0.0055141  | -0.00950071 | -0.67497259 | 0.499703336 | 0.645634398 | -6.8655394  | ns |
| PRSS27    | 0.005784972 | 0.003530051 | 0.674052781 | 0.500287979 | 0.646103891 | -6.86132454 | ns |
| TRIM25    | -0.01474921 | -0.00986909 | -0.66949152 | 0.503191981 | 0.649567014 | -6.87173108 | ns |
| METAP1D   | -0.01180255 | -0.01158085 | -0.66909149 | 0.503447182 | 0.649609267 | -6.86918285 | ns |
| KLHL41    | -0.00670652 | 0.073846963 | -0.66691828 | 0.504834249 | 0.651111311 | -6.87556686 | ns |
| GRIK2     | -0.00542362 | 0.066927855 | -0.66569579 | 0.505615456 | 0.651830963 | -6.87637596 | ns |
| PACS2     | -0.00840558 | 0.04715147  | -0.66478888 | 0.506195732 | 0.652291058 | -6.86135672 | ns |
| ITIH5     | 0.006105023 | 0.028145376 | 0.663784662 | 0.506838048 | 0.652830658 | -6.87584769 | ns |
| GTF2IRD1  | 0.009828334 | 0.201916723 | 0.661058203 | 0.508584963 | 0.654360412 | -6.87099513 | ns |
| CASP7     | -0.0111168  | -0.01620743 | -0.66084262 | 0.508723066 | 0.654360412 | -6.87854259 | ns |
| ANK2      | -0.00951649 | 0.170783597 | -0.66058136 | 0.508890946 | 0.654360412 | -6.86412575 | ns |
| BTLA      | -0.01135476 | 0.116180113 | -0.66053283 | 0.508922088 | 0.654360412 | -6.86294394 | ns |
| DAB2      | -0.01598353 | -0.10293728 | -0.65748209 | 0.510880731 | 0.656229421 | -6.88258453 | ns |
| FCER1A    | 0.00310235  | -0.01828823 | 0.657142389 | 0.511099108 | 0.656229421 | -6.88199553 | ns |
| CXCL8     | 0.009500362 | -0.00524954 | 0.656981032 | 0.511203006 | 0.656229421 | -6.87566714 | ns |
| GET3      | -0.00744348 | 0.09234847  | -0.65644706 | 0.511546275 | 0.656229421 | -6.88166585 | ns |
| NGFR      | 0.003734937 | 0.000947915 | 0.655984714 | 0.511843704 | 0.656229421 | -6.88196722 | ns |
| CD209     | 0.005514441 | 0.0383518   | 0.65557338  | 0.51210846  | 0.656229421 | -6.87835054 | ns |
| UXS1      | 0.007223214 | 0.002101821 | 0.655529014 | 0.512137238 | 0.656229421 | -6.86838561 | ns |
| FAM3D     | 0.011043193 | 0.096593424 | 0.655472125 | 0.512173579 | 0.656229421 | -6.88095634 | ns |
| OSMR      | -0.00285115 | -0.01526847 | -0.65462836 | 0.512716846 | 0.656534789 | -6.87957286 | ns |
| NPHS1     | 0.00447488  | 0.008526345 | 0.65440396  | 0.512861594 | 0.656534789 | -6.86781523 | ns |
| MYOM3     | 0.012065151 | 0.000596725 | 0.653844105 | 0.513222175 | 0.65670848  | -6.87027485 | ns |
| CRYM      | -0.0097621  | 0.103205441 | -0.65234573 | 0.51418811  | 0.657321713 | -6.87135891 | ns |
| PDLIM7    | -0.01805702 | 0.018858306 | -0.65223053 | 0.514262191 | 0.657321713 | -6.88158542 | ns |
| ERBIN     | -0.01462044 | -0.05398046 | -0.65205304 | 0.514376752 | 0.657321713 | -6.87785903 | ns |
| SLC13A1   | -0.00820043 | 0.119842829 | -0.65101417 | 0.515047021 | 0.657890333 | -6.88418669 | ns |
| BAG6      | -0.00506791 | 0.019409766 | -0.65023327 | 0.515551469 | 0.658246737 | -6.8724868  | ns |
| PCDHB15   | 0.005126771 | 0.013597725 | 0.647142898 | 0.517549078 | 0.660508439 | -6.8866826  | ns |
| DDX1      | -0.0064935  | 0.089173718 | -0.64562976 | 0.518528739 | 0.661274786 | -6.88731632 | ns |
| SERPINA12 | 0.015333169 | 0.197030936 | 0.64550042  | 0.518612901 | 0.661274786 | -6.8691708  | ns |
| TLR4      | 0.003688464 | 0.003920223 | 0.645166788 | 0.51882895  | 0.661274786 | -6.87377599 | ns |
| UGDH      | -0.01297094 | 0.276952341 | -0.64471397 | 0.519122403 | 0.661360129 | -6.87441016 | ns |
| SLC39A14  | 0.004417751 | 0.00447781  | 0.643779109 | 0.51972848  | 0.661843508 | -6.8762081  | ns |
| FZD8      | -0.00541258 | 0.031289131 | -0.64337074 | 0.519993351 | 0.661892147 | -6.87713349 | ns |
| ITPA      | 0.008669128 | 0.00633964  | 0.641221122 | 0.521388804 | 0.663282358 | -6.87664046 | ns |
| TPBGL     | -0.00538834 | 0.053055573 | -0.64098857 | 0.521539826 | 0.663282358 | -6.87799029 | ns |
| TACC3     | 0.016278149 | -0.05320279 | 0.640028015 | 0.522163971 | 0.663787024 | -6.88557498 | ns |
| FUT8      | 0.008036032 | 0.050723072 | 0.638275665 | 0.523303822 | 0.664013425 | -6.88613234 | ns |
| NXP1      | 0.005248321 | 0.010402595 | 0.638253933 | 0.523318094 | 0.664013425 | -6.87972547 | ns |
| PTPRR     | 0.004639228 | 0.016323987 | 0.63813846  | 0.52339298  | 0.664013425 | -6.89318998 | ns |
| LYSMD3    | -0.01315721 | 0.162853046 | -0.63810511 | 0.523414924 | 0.664013425 | -6.87982172 | ns |
| PCSK9     | -0.00543431 | -0.02306852 | -0.63775204 | 0.52364452  | 0.664013425 | -6.89427212 | ns |
| S100A14   | 0.006681248 | 0.084926831 | 0.637656859 | 0.523706479 | 0.664013425 | -6.89452616 | ns |
| DBNL      | -0.01283961 | -0.04412986 | -0.63628944 | 0.524597234 | 0.664854133 | -6.8917865  | ns |
| PIKFYVE   | -0.00711013 | 0.065213124 | -0.63523369 | 0.525285679 | 0.665437823 | -6.88009128 | ns |
| LIPF      | -0.00747155 | 0.015005395 | -0.63432109 | 0.525880917 | 0.665802765 | -6.88194197 | ns |

|           |             |             |             |             |             |             |    |
|-----------|-------------|-------------|-------------|-------------|-------------|-------------|----|
| PPIB      | -0.01303082 | -0.09391115 | -0.63409272 | 0.526029787 | 0.665802765 | -6.89004476 | ns |
| ABCA2     | -0.00465192 | 0.000989298 | -0.6330653  | 0.526700632 | 0.666363018 | -6.88180106 | ns |
| NAAA      | 0.008119148 | 0.052243935 | 0.632194928 | 0.52726904  | 0.666526342 | -6.88751336 | ns |
| ATP6V1D   | 0.003709962 | 0.006619696 | 0.632168463 | 0.52728625  | 0.666526342 | -6.89054052 | ns |
| CAMLG     | -0.00691712 | 0.086588549 | -0.63037189 | 0.52846083  | 0.667362127 | -6.88469269 | ns |
| DOC2B     | -0.00445793 | 0.019526688 | -0.63029748 | 0.528509497 | 0.667362127 | -6.88473927 | ns |
| TLR3      | -0.00836816 | -0.12203715 | -0.63010817 | 0.528633082 | 0.667362127 | -6.8996345  | ns |
| TEF       | 0.00544232  | 0.016446648 | 0.628655859 | 0.529583934 | 0.66827359  | -6.88456363 | ns |
| ACRBP     | -0.00479683 | 0.029913228 | -0.62468351 | 0.532188025 | 0.671269561 | -6.90086905 | ns |
| GRIN2B    | 0.007161138 | 0.105742331 | 0.624219119 | 0.532493137 | 0.671364404 | -6.88918831 | ns |
| ITIH3     | 0.005131268 | -0.04103274 | 0.623181358 | 0.533174608 | 0.671933472 | -6.89817739 | ns |
| HPCAL1    | -0.00993659 | -0.10820676 | -0.621954   | 0.533981248 | 0.672659726 | -6.90470519 | ns |
| DCDC2C    | 0.00779232  | 0.044513062 | 0.61935579  | 0.535691391 | 0.674240099 | -6.88911282 | ns |
| TFF1      | -0.00968533 | 0.023579233 | -0.61908475 | 0.53586976  | 0.674240099 | -6.89821673 | ns |
| CLINT1    | -0.00610899 | 0.025287201 | -0.61899579 | 0.535928517 | 0.674240099 | -6.88933418 | ns |
| TPSAB1    | -0.0069729  | -0.03114601 | -0.61573138 | 0.538080864 | 0.676544369 | -6.90788028 | ns |
| MYL1      | 0.004966866 | 0.036114753 | 0.615468864 | 0.538254443 | 0.676544369 | -6.89271021 | ns |
| HLA-DRA   | 0.004592616 | -0.00638852 | 0.615164556 | 0.538455176 | 0.676544369 | -6.90357715 | ns |
| TAB2      | 0.013320672 | 0.011923119 | 0.611931524 | 0.540592176 | 0.678757971 | -6.90205151 | ns |
| BST1      | -0.00629842 | -0.13496272 | -0.6114684  | 0.540898499 | 0.678757971 | -6.9109262  | ns |
| IL2       | 0.004116314 | -0.01581604 | 0.611444857 | 0.540914315 | 0.678757971 | -6.89655884 | ns |
| NELL2     | 0.003703614 | 0.012721347 | 0.609164471 | 0.542424405 | 0.680360508 | -6.90856428 | ns |
| TRDMT1    | -0.01039689 | 0.072068488 | -0.60826315 | 0.543022009 | 0.680817632 | -6.90427437 | ns |
| PDGFRA    | 0.00364648  | -0.00175355 | 0.6070422   | 0.54383191  | 0.68154042  | -6.90629363 | ns |
| KRT14     | 0.003642781 | 0.012872668 | 0.605438292 | 0.544897239 | 0.682582556 | -6.88477655 | ns |
| FBN2      | -0.00723654 | -0.03299428 | -0.60478583 | 0.545330389 | 0.682806978 | -6.90038544 | ns |
| KEL       | -0.00470857 | -0.00622713 | -0.60430828 | 0.5456478   | 0.682806978 | -6.90067024 | ns |
| CREF1     | -0.00544648 | -0.01338478 | -0.60411234 | 0.545777907 | 0.682806978 | -6.90805586 | ns |
| PRKCQ     | -0.00565472 | 0.043364403 | -0.60231896 | 0.546970882 | 0.684006413 | -6.90205912 | ns |
| TSNAX     | -0.00485471 | 0.028248271 | -0.60150477 | 0.547512906 | 0.684391133 | -6.90114862 | ns |
| KCNC4     | 0.006820521 | 0.109911548 | 0.600778821 | 0.547996342 | 0.684702319 | -6.90344689 | ns |
| FUCA1     | -0.01073793 | -0.2108768  | -0.60023371 | 0.5483593   | 0.684862769 | -6.91518567 | ns |
| CSNK1D    | -0.00764384 | 0.102801037 | -0.59813006 | 0.54976216  | 0.686321295 | -6.90281459 | ns |
| BTC       | -0.00966083 | 0.089865594 | -0.59757594 | 0.550131918 | 0.686489402 | -6.90444642 | ns |
| IL36G     | -0.00808922 | 0.077347882 | -0.59707671 | 0.550465201 | 0.68661187  | -6.90163786 | ns |
| EFCAB2    | 0.004194861 | 0.026918773 | 0.596342343 | 0.550955391 | 0.686929864 | -6.91140553 | ns |
| TMED10    | 0.006076713 | 0.0723704   | 0.595803063 | 0.551315767 | 0.686991306 | -6.90453844 | ns |
| SERPINB6  | -0.00773207 | 0.008138884 | -0.59556407 | 0.551475212 | 0.686991306 | -6.91871713 | ns |
| CERT      | -0.00777498 | -0.00329397 | -0.59433588 | 0.552296407 | 0.687720899 | -6.90660583 | ns |
| FAP       | 0.003380056 | -0.00573277 | 0.591963467 | 0.55388368  | 0.689403387 | -6.92223743 | ns |
| ESR1      | -0.00695908 | 0.099098763 | -0.58753155 | 0.556855593 | 0.692807129 | -6.90905439 | ns |
| SNX18     | 0.005232726 | 0.09396236  | 0.585828678 | 0.5579992   | 0.693934269 | -6.92389057 | ns |
| KRT19     | 0.008061428 | 0.016545685 | 0.583265449 | 0.559723205 | 0.695781933 | -6.92161335 | ns |
| SV2A      | -0.00719316 | 0.061479963 | -0.58216328 | 0.560465387 | 0.696408055 | -6.91371905 | ns |
| SERPINB9  | -0.00420861 | -0.06070617 | -0.57952911 | 0.562240758 | 0.698316892 | -6.92166045 | ns |
| PER3      | -0.01378848 | 0.093361329 | -0.57892328 | 0.562649612 | 0.69852758  | -6.91404035 | ns |
| NECTIN1   | -0.00378676 | 0.008548204 | -0.5770751  | 0.563897364 | 0.699779134 | -6.91510124 | ns |
| PLXDC1    | 0.004225177 | 0.029775412 | 0.574961972 | 0.565325616 | 0.701253525 | -6.91761311 | ns |
| SRC       | 0.015021271 | -0.05705954 | 0.573816689 | 0.566100231 | 0.70191621  | -6.92894758 | ns |
| MAP1LC3B2 | 0.007311091 | 0.15389875  | 0.572672356 | 0.566875123 | 0.702578676 | -6.91795916 | ns |
| BRSK2     | -0.00446134 | 0.068094003 | -0.57012369 | 0.568602057 | 0.704420029 | -6.93503638 | ns |
| ADGRE1    | -0.0061822  | 0.019804601 | -0.56840481 | 0.569768382 | 0.705565596 | -6.93387875 | ns |
| COPB2     | -0.00492854 | 0.014551357 | -0.56772904 | 0.570227451 | 0.705834743 | -6.92075843 | ns |
| TMEM132A  | -0.00724367 | 0.003499861 | -0.56727525 | 0.570535633 | 0.70591697  | -6.92194591 | ns |
| ZP3       | 0.029914034 | -1.06320738 | 0.566409405 | 0.571123933 | 0.706345567 | -6.92243333 | ns |
| MZT1      | -0.00627515 | 0.068944765 | -0.56422722 | 0.572607914 | 0.707619901 | -6.92368552 | ns |
| TRIM5     | 0.010488819 | -0.00204847 | 0.564181326 | 0.572638982 | 0.707619901 | -6.93343782 | ns |
| SCIN      | -0.00836335 | 0.081131353 | -0.56276977 | 0.573600032 | 0.708507654 | -6.92540778 | ns |
| MED18     | -0.00929952 | -0.01869304 | -0.56160569 | 0.574393069 | 0.709187214 | -6.92515108 | ns |
| ATXN2     | -0.01273967 | 0.226510673 | -0.56072456 | 0.574993652 | 0.709628683 | -6.92654879 | ns |
| FKBP7     | -0.00568947 | 0.046984911 | -0.55948597 | 0.575838439 | 0.710371036 | -6.925297   | ns |
| FIS1      | -0.00928691 | 0.041544459 | -0.55795163 | 0.576885562 | 0.711197207 | -6.93533031 | ns |
| NUDT10    | 0.002702311 | 0.022348909 | 0.557430797 | 0.577241403 | 0.711197207 | -6.9274439  | ns |
| STX1B     | -0.00478716 | 0.03973848  | -0.55727636 | 0.57734688  | 0.711197207 | -6.92780018 | ns |
| KHDC3L    | 0.007421222 | 0.114029158 | 0.556731024 | 0.57771951  | 0.711197207 | -6.92568452 | ns |
| ZNRF4     | -0.00609179 | 0.023850275 | -0.55672126 | 0.57772595  | 0.711197207 | -6.94074545 | ns |

|             |             |              |             |             |             |             |    |
|-------------|-------------|--------------|-------------|-------------|-------------|-------------|----|
| SPINK5      | 0.003944219 | 0.02931036   | 0.555714277 | 0.578414284 | 0.711588154 | -6.93842938 | ns |
| TARS1       | 0.004134435 | 0.01433718   | 0.555385595 | 0.578638985 | 0.711588154 | -6.94148317 | ns |
| HIF1A       | -0.00738269 | 0.100497978  | -0.5551876  | 0.578774612 | 0.711588154 | -6.92740702 | ns |
| LAYN        | 0.003724438 | -0.00549234  | 0.554135572 | 0.579494201 | 0.712173008 | -6.9346974  | ns |
| CNPY2       | 0.006956929 | 0.093270407  | 0.553628509 | 0.579841327 | 0.712299821 | -6.93023675 | ns |
| MCTS1       | -0.002855   | 0.037621962  | -0.55316341 | 0.580159513 | 0.712390992 | -6.94236857 | ns |
| ID4         | -0.00495169 | 0.076025211  | -0.55260041 | 0.580545151 | 0.712564876 | -6.93636337 | ns |
| CHMP1A      | -0.00943348 | -0.05802189  | -0.55205665 | 0.580917624 | 0.712722462 | -6.93709872 | ns |
| FABP1       | -0.01131653 | -0.09211696  | -0.55129047 | 0.581442606 | 0.712980344 | -6.93850112 | ns |
| MEP1A       | -0.00779488 | 0.00702397   | -0.55103717 | 0.581616157 | 0.712980344 | -6.9435346  | ns |
| TBC1D23     | -0.01085594 | 0.017106392  | -0.54902295 | 0.582997713 | 0.714374033 | -6.93931303 | ns |
| ADAM9       | -0.00313773 | -0.00934361  | -0.54628275 | 0.58487947  | 0.716379217 | -6.94612567 | ns |
| GFAP        | 0.005061369 | 0.000249587  | 0.545683548 | 0.585291589 | 0.716583414 | -6.9331913  | ns |
| TIA1        | -0.01414098 | 0.008295272  | -0.5446441  | 0.586006454 | 0.717157941 | -6.93025641 | ns |
| FGFBP2      | -0.00543993 | 0.026673303  | -0.54387756 | 0.586533561 | 0.717502304 | -6.94836923 | ns |
| C1QA        | -0.00266424 | 9.8688376300 | -0.54282072 | 0.587261066 | 0.718091421 | -6.94903683 | ns |
| TSLP        | 0.007254793 | 0.094718357  | 0.541353173 | 0.588272181 | 0.719026693 | -6.93691124 | ns |
| MANSC4      | 0.00686442  | 0.052623327  | 0.536936391 | 0.591319499 | 0.722360655 | -6.93764906 | ns |
| MRPL58      | -0.00788071 | 0.125381575  | -0.53640019 | 0.591689689 | 0.722360655 | -6.95356976 | ns |
| FAM171B     | 0.002877548 | 0.026016658  | 0.536324509 | 0.591742016 | 0.722360655 | -6.95181806 | ns |
| BATF        | 0.009246683 | 0.214586247  | 0.535694281 | 0.592177739 | 0.722590471 | -6.93951343 | ns |
| PTPN6       | 0.010344564 | -0.16876903  | 0.535162781 | 0.592545037 | 0.722736636 | -6.94950719 | ns |
| COPE        | -0.0052676  | 0.040668882  | -0.53202336 | 0.594717663 | 0.725083747 | -6.94145781 | ns |
| REG4        | -0.0052986  | -0.02641816  | -0.53163084 | 0.594989388 | 0.725112275 | -6.95046129 | ns |
| GABRA4      | 0.006873709 | 0.120533067  | 0.530954741 | 0.595457963 | 0.725366268 | -6.94268684 | ns |
| NUP50       | -0.00344788 | 0.034373407  | -0.53061328 | 0.595694627 | 0.725366268 | -6.94100094 | ns |
| MCEE        | -0.00456792 | 0.031594142  | -0.52906118 | 0.596770576 | 0.726373523 | -6.95745338 | ns |
| SERPINC1    | 0.001553559 | 0.002459017  | 0.526410183 | 0.598610795 | 0.7283098   | -6.95614706 | ns |
| MMP10       | -0.00680269 | 0.044186699  | -0.52558766 | 0.599182357 | 0.728701576 | -6.95172202 | ns |
| PNLIPRP2    | 0.033880995 | -0.91199875  | 0.52356553  | 0.600588333 | 0.729322363 | -6.95330042 | ns |
| MAGED1      | -0.00538912 | 0.037134512  | -0.52314923 | 0.600878112 | 0.729322363 | -6.94586562 | ns |
| OGA         | -0.00746987 | 0.01674354   | -0.52314735 | 0.600879212 | 0.729322363 | -6.9584136  | ns |
| AKR7L       | -0.00729249 | 0.074744932  | -0.52283763 | 0.601094958 | 0.729322363 | -6.94472389 | ns |
| NPPB        | 0.014153207 | -0.10626043  | 0.522770247 | 0.601141834 | 0.729322363 | -6.94673064 | ns |
| EIF2AK3     | -0.00715058 | 0.105939308  | -0.52269903 | 0.601191414 | 0.729322363 | -6.94514032 | ns |
| TCN2        | 0.003319408 | -0.01894231  | 0.518336232 | 0.604231104 | 0.732705492 | -6.96184633 | ns |
| GIT1        | -0.01026895 | 0.003260664  | -0.51783901 | 0.604578215 | 0.732822079 | -6.94730694 | ns |
| DBH         | 0.011386206 | -0.1734946   | 0.517061188 | 0.605120853 | 0.733175474 | -6.96061051 | ns |
| FGF12       | 0.004823399 | 0.065087724  | 0.516464402 | 0.605537691 | 0.733268981 | -6.94801292 | ns |
| DOCK9       | -0.01210832 | 0.374213515  | -0.51623155 | 0.605700268 | 0.733268981 | -6.95034292 | ns |
| SEMA3G      | -0.00446579 | 0.028069017  | -0.51518101 | 0.606434057 | 0.733853065 | -6.95076863 | ns |
| HEBP1       | -0.00579046 | 0.021654101  | -0.51188398 | 0.608739716 | 0.736338016 | -6.95232375 | ns |
| EIF5        | 0.00447455  | 0.045853798  | 0.511195563 | 0.609221633 | 0.736615805 | -6.95104607 | ns |
| MTPN        | -0.00363889 | 0.025931889  | -0.51020893 | 0.609912573 | 0.737145991 | -6.95317391 | ns |
| GP6         | -0.00976879 | -0.0482244   | -0.50914215 | 0.610659914 | 0.737588697 | -6.96202814 | ns |
| GRP         | -0.00537589 | -0.0078918   | -0.5089652  | 0.610784065 | 0.737588697 | -6.95310803 | ns |
| KLK7        | -0.00399792 | -0.00131242  | -0.50833142 | 0.611228534 | 0.737820306 | -6.9416368  | ns |
| MRPL28      | -0.00372727 | 0.041628354  | -0.50622732 | 0.612704268 | 0.73929474  | -6.96919432 | ns |
| RAB2B       | -0.00622675 | 0.019342448  | -0.50586825 | 0.612956358 | 0.73929474  | -6.96758242 | ns |
| CALCB       | -0.00389507 | 0.028331241  | -0.50539522 | 0.61328846  | 0.739389886 | -6.96858033 | ns |
| SAG         | -0.00536099 | 0.010505829  | -0.50412405 | 0.614181575 | 0.74016104  | -6.95647753 | ns |
| MDK         | -0.00550565 | -0.00417166  | -0.50280249 | 0.615110318 | 0.740974476 | -6.96792217 | ns |
| CRNN        | 0.00723169  | 0.007228069  | 0.50118841  | 0.616245927 | 0.742036332 | -6.95303139 | ns |
| UPK3BL1     | -0.00541574 | 0.070514426  | -0.49898409 | 0.617797799 | 0.743504043 | -6.96293279 | ns |
| PNMA2       | -0.00448563 | 0.013310812  | -0.49873398 | 0.617974079 | 0.743504043 | -6.95916173 | ns |
| FABP9       | 0.006020137 | 0.02416113   | 0.497850496 | 0.618596557 | 0.743946435 | -6.96842313 | ns |
| SFTPD       | -0.00712144 | -0.00148899  | -0.4972916  | 0.618990577 | 0.744113827 | -6.96648388 | ns |
| DENR        | 0.005744433 | 0.057299741  | 0.496568159 | 0.619500871 | 0.7444208   | -6.95802126 | ns |
| DOK1        | 0.013600236 | -0.15897007  | 0.494870155 | 0.620698793 | 0.745553466 | -6.97380907 | ns |
| LYPD1       | 0.006826588 | 0.163751606  | 0.493998195 | 0.621314655 | 0.745826233 | -6.96083114 | ns |
| CGB3_CGB5_C | 0.004223752 | -0.00984943  | 0.493778378 | 0.621469711 | 0.745826233 | -6.97342948 | ns |
| SERPINI1    | -0.00296965 | 0.028351068  | -0.49346372 | 0.621692141 | 0.745826233 | -6.96053036 | ns |
| NDRG1       | -0.00740123 | 0.134455926  | -0.4919079  | 0.622791622 | 0.746838413 | -6.96185448 | ns |
| NRGN        | -0.00890388 | -0.02731205  | -0.49030414 | 0.623925646 | 0.747891169 | -6.9751275  | ns |
| PTPRM       | -0.00254252 | -0.00924396  | -0.48911093 | 0.624770165 | 0.748596176 | -6.97169236 | ns |
| IL5         | 0.015278843 | 0.307193057  | 0.487766115 | 0.625722594 | 0.74942985  | -6.96406646 | ns |

|          |             |             |             |             |              |             |    |
|----------|-------------|-------------|-------------|-------------|--------------|-------------|----|
| HTR1B    | -0.00421129 | 0.067602951 | -0.48657312 | 0.626567951 | 0.750134653  | -6.96511174 | ns |
| RILPL2   | -0.00960844 | -0.07044128 | -0.48573867 | 0.627159336 | 0.750373964  | -6.97850421 | ns |
| NLGN1    | -0.00660126 | 0.147300529 | -0.48556621 | 0.627281796 | 0.750373964  | -6.96493453 | ns |
| CEP112   | -0.0043195  | 0.066259552 | -0.48346424 | 0.628773187 | 0.751850002  | -6.96474274 | ns |
| POMC     | 0.006705349 | -0.02480853 | 0.483013328 | 0.629093286 | 0.751924844  | -6.96589144 | ns |
| INPP1    | -0.00560871 | 0.027317281 | -0.48236458 | 0.629553876 | 0.752167479  | -6.9734555  | ns |
| ADGRB3   | 0.003425601 | 0.013372381 | 0.480158678 | 0.631121458 | 0.753731966  | -6.97290517 | ns |
| SLC12A2  | 0.002549331 | 0.01478247  | 0.479512795 | 0.631580844 | 0.753765388  | -6.96663222 | ns |
| CLEC4M   | 0.004650681 | 0.040276335 | 0.479393191 | 0.63166572  | 0.753765388  | -6.98009285 | ns |
| BRD3     | -0.00463449 | 0.040608058 | -0.4786395  | 0.632202073 | 0.754046878  | -6.96704772 | ns |
| RRP15    | 0.008836777 | 0.006131283 | 0.477843295 | 0.632768671 | 0.754046878  | -6.96929246 | ns |
| ANXA4    | -0.00736257 | 0.023679777 | -0.47761371 | 0.63293202  | 0.754046878  | -6.97408269 | ns |
| ENO2     | -0.00679925 | 0.024600322 | -0.47760999 | 0.632934554 | 0.754046878  | -6.98333095 | ns |
| ELAC1    | -0.00819587 | -0.03533095 | -0.47682987 | 0.633489986 | 0.754400799  | -6.98354761 | ns |
| DUSP29   | -0.00618621 | 0.098036284 | -0.47498052 | 0.63480772  | 0.75566186   | -6.96998364 | ns |
| LRFN2    | -0.0045574  | 0.057596577 | -0.47337569 | 0.635952007 | 0.75671551   | -6.9707394  | ns |
| IL20RB   | -0.00402849 | 0.00850253  | -0.47204196 | 0.636903692 | 0.757539218  | -6.96981761 | ns |
| ANKMY2   | 0.007654233 | 0.016214311 | 0.47100025  | 0.63764739  | 0.758114975  | -6.97030542 | ns |
| CCL15    | 0.004296885 | 0.03510263  | 0.470146318 | 0.638257094 | 0.758531019  | -6.9864971  | ns |
| IKBKG    | -0.00925399 | -0.00835634 | -0.46729217 | 0.640297495 | 0.760646332  | -6.98307035 | ns |
| PRTFDC1  | 0.011371278 | -0.15489868 | 0.466652822 | 0.640755035 | 0.760732629  | -6.97387563 | ns |
| PRKD2    | -0.00445677 | 0.08054571  | -0.46646258 | 0.640891187 | 0.760732629  | -6.97276233 | ns |
| STAM     | -0.00351702 | 0.041060788 | -0.46598768 | 0.641230887 | 0.760826571  | -6.98683176 | ns |
| KIAA2013 | 0.005464905 | 0.130391587 | 0.463933352 | 0.642702033 | 0.7622262362 | -6.98778055 | ns |
| FRMD7    | -0.00304585 | -0.00560272 | -0.46242412 | 0.643783859 | 0.763235431  | -6.97582845 | ns |
| IL3      | 0.005580768 | -0.06562363 | 0.461636547 | 0.644348665 | 0.763595009  | -6.9737709  | ns |
| DCTD     | -0.00878521 | -0.05431009 | -0.4607227  | 0.645004181 | 0.764061748  | -6.97715939 | ns |
| B3GNT7   | 0.003350335 | -0.0376696  | 0.460294249 | 0.645311666 | 0.764116003  | -6.97653337 | ns |
| ITIH1    | 0.001715994 | -0.0184061  | 0.459388107 | 0.645961932 | 0.764575939  | -6.99066453 | ns |
| BSND     | 0.003199295 | 0.025292972 | 0.458456647 | 0.646631034 | 0.765057788  | -6.97522371 | ns |
| KLK15    | -0.0047     | 0.013451287 | -0.45753271 | 0.647294642 | 0.765532748  | -6.98983894 | ns |
| BABAM1   | 0.002640584 | 0.022090663 | 0.456823267 | 0.64780468  | 0.765825775  | -6.97683699 | ns |
| GP1BB    | -0.00623265 | 0.0065882   | -0.45625881 | 0.648210468 | 0.765995373  | -6.97743755 | ns |
| TNFSF8   | -0.00322298 | -0.00572543 | -0.45580662 | 0.648535435 | 0.766069365  | -6.99209638 | ns |
| DUOX2    | -0.00712439 | 0.152954815 | -0.45385302 | 0.649941154 | 0.767419397  | -6.98015283 | ns |
| CSRP3    | 0.008762372 | 0.120643488 | 0.453023291 | 0.650538509 | 0.767814246  | -6.97889843 | ns |
| CCND2    | 0.003399896 | -0.02658451 | 0.452612719 | 0.650834069 | 0.76785272   | -6.98627681 | ns |
| SCP2     | 0.007575051 | 0.213841977 | 0.451639519 | 0.651535207 | 0.768369469  | -6.98047961 | ns |
| LIF      | -0.00503541 | 0.014678149 | -0.45046072 | 0.65238475  | 0.769060747  | -6.98124966 | ns |
| GPR101   | -0.00547472 | 0.112691005 | -0.44735991 | 0.654621646 | 0.771243836  | -6.98329744 | ns |
| WNT9A    | -0.00268279 | -0.0054908  | -0.44716147 | 0.654764887 | 0.771243836  | -6.98291739 | ns |
| CGN      | -0.00356913 | 0.032727112 | -0.44662055 | 0.655155451 | 0.771392708  | -6.98296221 | ns |
| IGF1R    | -0.00201096 | -0.00848575 | -0.44559246 | 0.655897965 | 0.771955687  | -6.99040147 | ns |
| DDX4     | -0.0049106  | 0.069556098 | -0.44480549 | 0.656466731 | 0.772313801  | -6.98221747 | ns |
| PMM2     | -0.00533624 | 0.041929373 | -0.44379717 | 0.65719562  | 0.772649683  | -6.98300705 | ns |
| RGS10    | -0.00531191 | 0.050055733 | -0.44357575 | 0.657355523 | 0.772649683  | -6.99874919 | ns |
| HBQ1     | -0.00598589 | 0.055969472 | -0.44311896 | 0.657685869 | 0.772649683  | -6.99976243 | ns |
| NUDT2    | 0.005347344 | 0.044004771 | 0.442946556 | 0.657810655 | 0.772649683  | -6.991569   | ns |
| FGF6     | 0.003537286 | 0.044644467 | 0.442410223 | 0.658198747 | 0.772794669  | -6.98327272 | ns |
| CRYGD    | -0.00854964 | -4.33E-05   | -0.44127875 | 0.659017364 | 0.773444816  | -6.99872617 | ns |
| VPS4B    | -0.00833723 | 0.019127495 | -0.43954292 | 0.660274337 | 0.774608704  | -6.9987249  | ns |
| VSIG10   | 0.003035475 | 0.022119706 | 0.438316523 | 0.661162978 | 0.775339717  | -6.9992596  | ns |
| MED21    | 0.004555509 | 0.072308115 | 0.437666103 | 0.661634633 | 0.775581344  | -6.98569061 | ns |
| MAPK13   | -0.00374807 | -0.01175197 | -0.43723521 | 0.661947062 | 0.775636204  | -6.98466209 | ns |
| CCDC28A  | 0.002572872 | -0.00903071 | 0.436827426 | 0.662242747 | 0.775671409  | -6.98725838 | ns |
| RIPK4    | -0.00590684 | 0.172018718 | -0.43435344 | 0.664038038 | 0.777462338  | -6.98712503 | ns |
| AMIGO1   | 0.004482498 | 0.071392548 | 0.433275478 | 0.664820833 | 0.778066867  | -6.98879305 | ns |
| USO1     | -0.00846583 | -0.04736892 | -0.43185959 | 0.665849554 | 0.778877976  | -6.99638566 | ns |
| ERVV-1   | 0.003952124 | 0.046614404 | 0.431587595 | 0.666047366 | 0.778877976  | -6.98831432 | ns |
| DOK2     | -0.01137718 | -0.04117119 | -0.42951794 | 0.667552386 | 0.780325447  | -6.99767802 | ns |
| HBZ      | -0.00914619 | 0.091404729 | -0.4287074  | 0.668142137 | 0.780392952  | -7.00440604 | ns |
| SMAD2    | -0.00594383 | 0.062553313 | -0.42864237 | 0.668189481 | 0.780392952  | -7.00342508 | ns |
| EPN1     | -0.00374972 | 0.069220627 | -0.42833689 | 0.668411908 | 0.780392952  | -6.99689718 | ns |
| CNTNAP2  | -0.00375793 | -0.00203018 | -0.42759936 | 0.668948829 | 0.780707666  | -7.00071111 | ns |
| PDE1C    | -0.00468941 | 0.090444885 | -0.42667224 | 0.669624183 | 0.781046211  | -6.98919333 | ns |
| PRR5     | 0.004038749 | 0.03743917  | 0.426466754 | 0.669773874 | 0.781046211  | -6.99015148 | ns |

|          |             |             |             |             |             |             |    |
|----------|-------------|-------------|-------------|-------------|-------------|-------------|----|
| MYOM2    | 0.00423802  | 0.048417307 | 0.425856139 | 0.670218774 | 0.781253022 | -6.99075462 | ns |
| APOE     | 0.006117672 | 0.064077749 | 0.425029261 | 0.670821246 | 0.781643272 | -7.00575679 | ns |
| EGFL7    | -0.00364727 | -0.00495129 | -0.42251704 | 0.672653708 | 0.783465826 | -6.993121   | ns |
| CXCL1    | 0.008723995 | 0.068295683 | 0.419796032 | 0.674640354 | 0.785466441 | -7.00186978 | ns |
| DPEP2    | -0.00232521 | -0.00543528 | -0.41783377 | 0.676074524 | 0.786609614 | -7.00230415 | ns |
| ANGPTL3  | 0.003142471 | 0.002493272 | 0.417715499 | 0.676161004 | 0.786609614 | -7.00273603 | ns |
| ARHGEF5  | 0.006256319 | 0.062920942 | 0.416498815 | 0.677050963 | 0.787331267 | -6.99653589 | ns |
| CASP2    | -0.00606349 | 0.02706732  | -0.41571907 | 0.677621397 | 0.787680923 | -7.00568681 | ns |
| TADA3    | -0.00331501 | 0.008539283 | -0.4151762  | 0.678018687 | 0.787829116 | -7.00906857 | ns |
| SPRED2   | 0.003789203 | 0.055718089 | 0.414297361 | 0.678662257 | 0.788149726 | -6.99523206 | ns |
| CALCOCO1 | -0.0093972  | 0.011091652 | -0.41406201 | 0.678834439 | 0.788149726 | -7.01008589 | ns |
| PHLDB2   | -0.00771867 | 0.156974196 | -0.41305311 | 0.679573595 | 0.788694315 | -6.99487206 | ns |
| TXK      | 0.00630852  | 0.224679134 | 0.411576252 | 0.680655819 | 0.789458059 | -7.00388819 | ns |
| VSTM2B   | -0.00353292 | 0.074227913 | -0.41141723 | 0.680772395 | 0.789458059 | -7.00395318 | ns |
| PDIAS    | 0.004947159 | 0.027333797 | 0.408353894 | 0.683019698 | 0.791749709 | -6.99678874 | ns |
| DIABLO   | -0.00967331 | -0.02743327 | -0.40786225 | 0.683380538 | 0.791853639 | -7.00434253 | ns |
| SLAMF7   | -0.00513982 | -0.04434031 | -0.40719748 | 0.683868634 | 0.792104884 | -7.00916949 | ns |
| SUMF1    | -0.00547805 | 0.130165319 | -0.40596854 | 0.684771493 | 0.792786085 | -6.99862447 | ns |
| IL10     | 0.007113576 | 0.056158783 | 0.405062248 | 0.685437491 | 0.792786085 | -7.0007333  | ns |
| CD84     | 0.002729335 | -0.00421392 | 0.404853936 | 0.685590523 | 0.792786085 | -7.01011462 | ns |
| UBAC1    | -0.00308161 | 0.007699667 | -0.40456024 | 0.685806442 | 0.792786085 | -7.00772525 | ns |
| KIR2DL3  | 0.006605967 | 0.005696045 | 0.404549736 | 0.685814264 | 0.792786085 | -7.00050007 | ns |
| PDCD1LG2 | 0.002667205 | -0.01851512 | 0.402598599 | 0.687249166 | 0.794130417 | -7.00851157 | ns |
| MBL2     | 0.008669299 | -0.09040089 | 0.401778697 | 0.687852536 | 0.794313564 | -7.00693477 | ns |
| ADAM23   | -0.00300078 | -0.03862747 | -0.40126117 | 0.688233369 | 0.794313564 | -7.01686037 | ns |
| DEFB116  | -0.00606494 | 0.196574092 | -0.40125726 | 0.688236411 | 0.794313564 | -7.00272512 | ns |
| ARHGEF10 | -0.00757392 | 0.042159981 | -0.40090476 | 0.688495763 | 0.794313564 | -7.01664647 | ns |
| IFIT1    | -0.00421406 | 0.039074776 | -0.40053139 | 0.688770773 | 0.794317005 | -7.00834259 | ns |
| UBQLN3   | 0.00383316  | 0.065592933 | 0.399790768 | 0.689316311 | 0.794474078 | -7.00144099 | ns |
| MASP1    | -0.00200202 | -0.01695541 | -0.39937781 | 0.689620442 | 0.794474078 | -7.00797779 | ns |
| GNPDA2   | -0.00292563 | 0.030758233 | -0.39893965 | 0.689943297 | 0.794474078 | -7.0035336  | ns |
| NPTN     | 0.006987388 | 0.178361566 | 0.398869134 | 0.689995295 | 0.794474078 | -7.00276636 | ns |
| TRIM40   | 0.005766588 | 0.036227833 | 0.398408027 | 0.690335069 | 0.794551992 | -7.00319289 | ns |
| CSF2     | 0.002911675 | 0.012711188 | 0.397620909 | 0.690915292 | 0.794906482 | -7.00230018 | ns |
| NFIC     | 0.003497649 | 0.05872239  | 0.396645248 | 0.691634533 | 0.795420574 | -7.01833373 | ns |
| ITPRIP   | 0.003682974 | 0.085454469 | 0.395310619 | 0.692619256 | 0.79623946  | -7.00507734 | ns |
| RGS8     | 0.00560038  | 0.149895962 | 0.393376492 | 0.694046981 | 0.797424073 | -7.00536649 | ns |
| KLK6     | 0.00248222  | -0.00094985 | 0.393174708 | 0.694195888 | 0.797424073 | -7.0156404  | ns |
| TCP11    | -0.0046931  | 0.119664768 | -0.39023837 | 0.696365733 | 0.799602022 | -7.0123847  | ns |
| ATP5PO   | -0.00337444 | -0.00259435 | -0.3888522  | 0.69739098  | 0.800464489 | -7.00692664 | ns |
| LYZL2    | -0.00278414 | 0.034659601 | -0.38767228 | 0.698264062 | 0.801151694 | -7.00496354 | ns |
| PPM1F    | -0.00410915 | 0.009556691 | -0.38699366 | 0.698766219 | 0.801412946 | -7.02130541 | ns |
| MUC13    | -0.00402348 | -0.03085114 | -0.3853808  | 0.699960749 | 0.80246776  | -7.00826125 | ns |
| PTPRN2   | 0.00259687  | -0.00382663 | 0.38449295  | 0.7006185   | 0.802619632 | -7.01228236 | ns |
| ADGRE5   | -0.00246093 | 0.006426324 | -0.38445984 | 0.70064296  | 0.802619632 | -7.01955996 | ns |
| FKBP5    | -0.00790955 | -0.06021899 | -0.38368644 | 0.701216203 | 0.802853895 | -7.01534039 | ns |
| CDC37    | -0.0069494  | 0.032377899 | -0.38344199 | 0.701397359 | 0.802853895 | -7.02045863 | ns |
| ARFIP1   | 0.005319353 | 0.050202676 | 0.381866938 | 0.702565292 | 0.803875648 | -7.02404794 | ns |
| PSTPIP2  | -0.00830316 | -0.0979737  | -0.38009192 | 0.703882714 | 0.805005498 | -6.99288842 | ns |
| AKT3     | 0.004683448 | 0.020927993 | 0.379793467 | 0.704104124 | 0.805005498 | -7.00738579 | ns |
| CDK1     | -0.00278086 | -0.01174814 | -0.37647175 | 0.70657153  | 0.80751032  | -7.00921344 | ns |
| ACADSB   | -0.0066134  | 0.063970581 | -0.37600037 | 0.706921772 | 0.807594513 | -7.02547133 | ns |
| RRM2B    | -0.00547206 | 0.014017249 | -0.37464889 | 0.707926888 | 0.808426482 | -7.01206945 | ns |
| DSG4     | 0.004042903 | 0.019924538 | 0.373692622 | 0.708638205 | 0.808701791 | -7.01843783 | ns |
| CEND1    | 0.004367506 | 0.07432179  | 0.3729416   | 0.709197152 | 0.808701791 | -7.01361099 | ns |
| METAP1   | 0.002416538 | 0.010479665 | 0.372936687 | 0.709200812 | 0.808701791 | -7.01294718 | ns |
| BRME1    | -0.00309962 | 0.022215792 | -0.37283595 | 0.709275783 | 0.808701791 | -7.01365012 | ns |
| GFRAL    | -0.00457663 | 0.029409398 | -0.37161016 | 0.710188368 | 0.809426243 | -7.01182704 | ns |
| CNGB3    | 0.004114533 | 0.079514158 | 0.368107428 | 0.7127983   | 0.812060591 | -7.0153899  | ns |
| HADH     | -0.00482805 | 0.121435639 | -0.36751967 | 0.713236598 | 0.812060591 | -7.01373682 | ns |
| MINDY1   | -0.00802418 | -0.0426184  | -0.36738881 | 0.713334046 | 0.812060591 | -7.02764185 | ns |
| KIFBP    | -0.00657403 | -0.1074722  | -0.36699533 | 0.713627575 | 0.812078144 | -7.02211891 | ns |
| UNG      | 0.002546827 | 0.002390642 | 0.364872661 | 0.715211457 | 0.81356348  | -7.02855693 | ns |
| PKN3     | -0.00546306 | 0.05040816  | -0.36413413 | 0.715762893 | 0.813630191 | -7.02216412 | ns |
| STXBP3   | -0.00339212 | 0.054212812 | -0.363696   | 0.71609014  | 0.813630191 | -7.01608521 | ns |
| GAD2     | 0.003351731 | 0.056749684 | 0.363674736 | 0.716106024 | 0.813630191 | -7.01478803 | ns |

|             |             |             |             |             |             |             |    |
|-------------|-------------|-------------|-------------|-------------|-------------|-------------|----|
| BIRC2       | -0.00505022 | 0.039239979 | -0.36307024 | 0.716557517 | 0.813826508 | -7.01631104 | ns |
| CDFN        | 0.002368992 | -0.00268305 | 0.361610448 | 0.71764815  | 0.814748289 | -7.02406737 | ns |
| MNAT1       | 0.003214867 | 0.041180447 | 0.360480454 | 0.718492858 | 0.815390263 | -7.0234789  | ns |
| CASP8       | -0.00482416 | 0.032287333 | -0.35985666 | 0.71895924  | 0.815602557 | -7.03157012 | ns |
| AKR1B1      | -0.00585849 | -0.02913306 | -0.35864811 | 0.719863387 | 0.816000523 | -7.01789585 | ns |
| SH3GL3      | 0.006232309 | -0.01478156 | 0.358304377 | 0.720120528 | 0.816000523 | -7.02072749 | ns |
| TPM3        | 0.003115363 | 0.046215884 | 0.358267181 | 0.720148407 | 0.816000523 | -7.0170714  | ns |
| TIMM8A      | 0.006265229 | 0.032083689 | 0.357423497 | 0.720779655 | 0.816099948 | -7.03199017 | ns |
| ACADM       | -0.00502468 | 0.12953047  | -0.35712482 | 0.721003299 | 0.816099948 | -7.02467475 | ns |
| STAT5B      | -0.01066526 | -0.04174943 | -0.35702955 | 0.721074612 | 0.816099948 | -7.02570225 | ns |
| CHP1        | 0.005319651 | 0.05134312  | 0.356208915 | 0.7216891   | 0.816478951 | -7.01966952 | ns |
| PGLYRP2     | -0.00217261 | -0.03856765 | -0.35580193 | 0.721993814 | 0.816507334 | -7.02478721 | ns |
| APPL2       | 0.008096252 | -0.06227341 | 0.354931309 | 0.722645994 | 0.816928495 | -7.02000822 | ns |
| CR2         | -0.00352218 | 0.002131041 | -0.35353967 | 0.723688748 | 0.81779069  | -7.02897153 | ns |
| FGF2        | -0.0051085  | 0.05881199  | -0.35216836 | 0.72471684  | 0.818635656 | -7.02992246 | ns |
| GLYR1       | -0.00427629 | 0.120905003 | -0.35142999 | 0.725270582 | 0.818944355 | -7.03333924 | ns |
| MAP2K6      | -0.0076595  | -0.04439432 | -0.35036701 | 0.726068089 | 0.819527955 | -7.03055096 | ns |
| KRT6C       | 0.00263623  | 0.040945078 | 0.345431493 | 0.729774838 | 0.823393558 | -7.02155657 | ns |
| BAMBI       | 0.002112581 | 0.002512311 | 0.34444     | 0.730520227 | 0.823843422 | -7.02285635 | ns |
| XIAP        | 0.004039013 | 0.048017503 | 0.344150618 | 0.73073783  | 0.823843422 | -7.02165032 | ns |
| EHD3        | 0.008057266 | -0.09078662 | 0.342727874 | 0.731807969 | 0.824361188 | -7.02341348 | ns |
| EP300       | 0.002040424 | 0.001158383 | 0.342460247 | 0.732009343 | 0.824361188 | -7.02222664 | ns |
| RAD51       | -0.00372621 | 0.045274108 | -0.34241405 | 0.732044027 | 0.824361188 | -7.02978526 | ns |
| RNF4        | -0.00455875 | 0.127070525 | -0.3404501  | 0.733522279 | 0.825707423 | -7.03045127 | ns |
| INPP5J      | -0.00283699 | 0.024664776 | -0.33670439 | 0.736344307 | 0.828564692 | -7.04016606 | ns |
| NEXN        | -0.00470307 | 0.069892856 | -0.33560321 | 0.737174654 | 0.829179503 | -7.03858423 | ns |
| KRT17       | 0.002609722 | -0.00040967 | 0.334069343 | 0.738331893 | 0.830161389 | -7.02539033 | ns |
| MRPS16      | -0.00196708 | 0.03521769  | -0.33285396 | 0.739249165 | 0.830825595 | -7.02544795 | ns |
| PCDH17      | -0.00245353 | 0.01419953  | -0.33253259 | 0.739491685 | 0.830825595 | -7.03438202 | ns |
| NAP1L4      | -0.00272771 | -0.02855715 | -0.32933973 | 0.741903389 | 0.833214575 | -7.03905141 | ns |
| IL6ST       | -0.00122119 | -0.00855254 | -0.32700089 | 0.743671685 | 0.8348794   | -7.03619386 | ns |
| EDF1        | -0.00456642 | 0.083597385 | -0.32601687 | 0.744415984 | 0.835393802 | -7.04368389 | ns |
| DEFB104A_DE | -0.00360926 | 0.097146164 | -0.32509256 | 0.745115533 | 0.835553683 | -7.03019673 | ns |
| SPESP1      | 0.001931524 | 0.025112008 | 0.325072292 | 0.74513075  | 0.835553683 | -7.04320432 | ns |
| NRXN3       | 0.002345572 | 0.05584233  | 0.32411438  | 0.745855925 | 0.836045797 | -7.02984819 | ns |
| CEACAM1     | -0.00142186 | -0.00458456 | -0.32160576 | 0.747755737 | 0.837568644 | -7.04211124 | ns |
| GPC5        | 0.003873517 | 0.023330055 | 0.321563013 | 0.74778817  | 0.837568644 | -7.03709831 | ns |
| IL1RL1      | 0.003232423 | -0.03532132 | 0.320964315 | 0.748241776 | 0.83773685  | -7.04280322 | ns |
| IL2RG       | 0.002287222 | 0.025331718 | 0.320215712 | 0.748809144 | 0.83773685  | -7.04375161 | ns |
| SEMA4C      | -0.00187033 | 0.004560033 | -0.31957826 | 0.74929242  | 0.83773685  | -7.03828647 | ns |
| EGF         | -0.00717248 | -0.08533551 | -0.31934275 | 0.74947098  | 0.83773685  | -7.03850268 | ns |
| CD177       | 0.008818457 | -0.24156238 | 0.319303109 | 0.749501023 | 0.83773685  | -7.04023054 | ns |
| CSF1R       | -0.00250629 | 0.001406766 | -0.31909376 | 0.749659722 | 0.83773685  | -7.04395242 | ns |
| ST8SIA1     | 0.003191244 | 0.0905163   | 0.31812998  | 0.750390762 | 0.838232986 | -7.03020752 | ns |
| NDUFS6      | -0.00537668 | 0.046530358 | -0.31637377 | 0.751723213 | 0.839400299 | -7.032066   | ns |
| DNLZ        | 0.005774815 | 0.235143263 | 0.31438954  | 0.753229549 | 0.840760812 | -7.03359549 | ns |
| PFDN4       | -0.003451   | 0.061249285 | -0.31352421 | 0.753886782 | 0.841172872 | -7.03078054 | ns |
| HYAL1       | -0.00152542 | -0.01284062 | -0.31277425 | 0.754456468 | 0.84148697  | -7.03816545 | ns |
| SMPDL3B     | 0.004750924 | 0.164424298 | 0.309994508 | 0.756569314 | 0.84314898  | -7.04695083 | ns |
| TNFSF13     | -0.00172544 | -0.01283804 | -0.30991095 | 0.756632865 | 0.84314898  | -7.04515854 | ns |
| TRIM24      | -0.00401547 | 0.040235476 | -0.30967437 | 0.756812835 | 0.84314898  | -7.03885031 | ns |
| CD207       | -0.00250967 | -0.00969881 | -0.30881912 | 0.757463401 | 0.843551918 | -7.03361645 | ns |
| TNNI3       | -0.00552754 | -0.10155824 | -0.30833696 | 0.757830206 | 0.843638659 | -7.03522812 | ns |
| SMPD3       | 0.003686339 | 0.115722524 | 0.306574328 | 0.759171642 | 0.844809906 | -7.03379213 | ns |
| PGM2        | 0.003719967 | 0.097148545 | 0.304558069 | 0.760706953 | 0.846195925 | -7.03595329 | ns |
| IL17RA      | 0.002902358 | -0.04241618 | 0.302596883 | 0.762201185 | 0.847296796 | -7.04632493 | ns |
| MUC16       | -0.0122629  | -0.57778733 | -0.30249751 | 0.762276946 | 0.847296796 | -7.04356331 | ns |
| CRH         | 0.005702849 | 0.086425125 | 0.299360506 | 0.76466914  | 0.849632378 | -7.03618711 | ns |
| SLC4A1      | -0.00293315 | 0.081927052 | -0.29818507 | 0.765565918 | 0.850305241 | -7.05112204 | ns |
| SERPINA4    | -0.00139013 | -0.0074732  | -0.29459242 | 0.768309283 | 0.853027798 | -7.04260036 | ns |
| SCRN1       | -0.00352088 | 0.043232895 | -0.29217452 | 0.77015714  | 0.854409909 | -7.0491207  | ns |
| OFD1        | 0.003834175 | 0.153501516 | 0.292029415 | 0.770268102 | 0.854409909 | -7.04566006 | ns |
| PSMA1       | -0.00298877 | 0.049360822 | -0.2918152  | 0.770431949 | 0.854409909 | -7.03948289 | ns |
| OSTN        | -0.00247256 | 0.042508414 | -0.28905878 | 0.772540359 | 0.856422874 | -7.04052206 | ns |
| MANEAL      | 0.002950894 | -0.01158438 | 0.287346481 | 0.773850999 | 0.857550253 | -7.03859106 | ns |
| CEACAM18    | 0.003843    | 0.137896503 | 0.28584192  | 0.775003077 | 0.858198344 | -7.04743573 | ns |



|           |             |             |             |             |             |             |    |
|-----------|-------------|-------------|-------------|-------------|-------------|-------------|----|
| IFNW1     | 0.002021616 | 0.040090482 | 0.285815151 | 0.775023641 | 0.858198344 | -7.04024354 | ns |
| SAT1      | -0.00285389 | 0.094941549 | -0.28387166 | 0.776512648 | 0.859521203 | -7.04079332 | ns |
| MYH7B     | -0.00247141 | 0.05545574  | -0.28337845 | 0.77689065  | 0.859613754 | -7.03971559 | ns |
| TMPRSS11B | -0.00439635 | 0.181872052 | -0.28269808 | 0.777412168 | 0.859864974 | -7.04299199 | ns |
| TMED8     | -0.00583342 | -0.03805682 | -0.28085219 | 0.778827529 | 0.860828913 | -7.05516403 | ns |
| UBE2Z     | -0.00338251 | 0.096815073 | -0.28079268 | 0.778873284 | 0.860828913 | -7.04131169 | ns |
| GGA1      | 0.004191192 | 0.162136785 | 0.27974812  | 0.779674597 | 0.861099205 | -7.04314999 | ns |
| DLL4      | 0.00488877  | 0.096239804 | 0.279705056 | 0.779707636 | 0.861099205 | -7.04289264 | ns |
| PTGR1     | 0.004561475 | 0.000851081 | 0.278059402 | 0.780970471 | 0.862167779 | -7.05728721 | ns |
| BRD2      | 0.001910072 | 0.017556094 | 0.277297718 | 0.781555313 | 0.862487345 | -7.04449372 | ns |
| ENOPH1    | -0.00298157 | 0.092678459 | -0.27608049 | 0.782489936 | 0.863192525 | -7.05682247 | ns |
| RPGR      | -0.00233394 | 0.026118205 | -0.27522755 | 0.783145188 | 0.863589104 | -7.0443977  | ns |
| DCC       | 0.001244327 | 0.018421443 | 0.273370099 | 0.78457247  | 0.864836396 | -7.0449037  | ns |
| HCG22     | -0.00291937 | 0.06826037  | -0.27127408 | 0.786183962 | 0.866285724 | -7.04426603 | ns |
| CD101     | -0.00234114 | -0.06271614 | -0.27065731 | 0.786658222 | 0.866481331 | -7.05795651 | ns |
| CSPG5     | 0.002665013 | 0.057561548 | 0.270084118 | 0.787099236 | 0.866640185 | -7.0464545  | ns |
| STK24     | -0.00356103 | 0.03087498  | -0.26926259 | 0.787731303 | 0.867009199 | -7.04600859 | ns |
| INSL3     | 0.003975186 | 0.640485637 | 0.268315177 | 0.788460296 | 0.867176481 | -7.05968331 | ns |
| MYL6B     | -0.00506597 | 0.267128984 | -0.26829327 | 0.788477246 | 0.867176481 | -7.04626924 | ns |
| CRYBB2    | -0.00355125 | 0.138784028 | -0.26690436 | 0.789546352 | 0.868025357 | -7.06005833 | ns |
| IL18RAP   | -0.00993537 | 0.437480727 | -0.26429394 | 0.791557015 | 0.869908349 | -7.05082549 | ns |
| STOML2    | 0.004989607 | 0.116380286 | 0.263554979 | 0.792126468 | 0.870206655 | -7.0450993  | ns |
| ARID3A    | -0.00211468 | 0.033694877 | -0.26106146 | 0.794048675 | 0.871856533 | -7.04883427 | ns |
| MRPL24    | -0.00202006 | 0.013004816 | -0.26069182 | 0.794333744 | 0.871856533 | -7.04706139 | ns |
| LMOD1     | 0.001763088 | 0.004095823 | 0.260444919 | 0.794524053 | 0.871856533 | -7.06278353 | ns |
| GFOD2     | 0.007156136 | 0.48734443  | 0.259797837 | 0.795023275 | 0.87207662  | -7.04825291 | ns |
| IGHMBP2   | 0.002925013 | 0.082171458 | 0.258458489 | 0.79605662  | 0.872882212 | -7.04763713 | ns |
| DKKL1     | -0.00480007 | -0.12792802 | -0.25613151 | 0.797852733 | 0.874523266 | -7.05642644 | ns |
| FMR1      | -0.00185284 | -0.00868669 | -0.25461289 | 0.799025587 | 0.875480192 | -7.04957736 | ns |
| NCK2      | -0.00574555 | -0.03250535 | -0.25128814 | 0.801594692 | 0.877965679 | -7.06149771 | ns |
| CRYZL1    | -0.00464662 | -0.00707406 | -0.24949485 | 0.802981426 | 0.879154768 | -7.05083143 | ns |
| SUSD4     | -0.00202547 | 0.018281077 | -0.24695981 | 0.804942606 | 0.880971668 | -7.06438722 | ns |
| HSBP1     | -0.00467269 | 0.031978279 | -0.24274166 | 0.808208832 | 0.884214983 | -7.05248211 | ns |
| DECR1     | -0.00499947 | -0.04681159 | -0.24184447 | 0.80890391  | 0.884374401 | -7.06246891 | ns |
| LEO1      | -0.00143187 | 0.00957895  | -0.24164863 | 0.80905563  | 0.884374401 | -7.06747085 | ns |
| TFRC      | -0.00200625 | 0.008120676 | -0.24138088 | 0.809263151 | 0.884374401 | -7.06261599 | ns |
| SERPINA1  | -0.00037757 | -0.00429912 | -0.24025437 | 0.810136311 | 0.884997392 | -7.05728857 | ns |
| RAB37     | -0.00434301 | 0.193401466 | -0.23979719 | 0.810490736 | 0.885053459 | -7.05365435 | ns |
| SLURP1    | 0.001772978 | 0.000671023 | 0.238501802 | 0.811495096 | 0.885818946 | -7.06364429 | ns |
| MGLL      | 0.004500387 | -0.09340847 | 0.237437639 | 0.812320455 | 0.886171698 | -7.06374443 | ns |
| MFAP3L    | -0.00319875 | 0.15983596  | -0.23730266 | 0.812425218 | 0.886171698 | -7.05404989 | ns |
| CENPJ     | -0.00336967 | 0.10837507  | -0.23638457 | 0.813137439 | 0.886617372 | -7.06026222 | ns |
| SCN2A     | 0.00223506  | 0.04412435  | 0.235965301 | 0.8134628   | 0.886641051 | -7.0550283  | ns |
| BCL2L1    | -0.00467652 | -0.02771123 | -0.23412364 | 0.81489209  | 0.88691253  | -7.06821556 | ns |
| VAV3      | -0.0047165  | 0.016715733 | -0.23402474 | 0.814968947 | 0.88691253  | -7.0554812  | ns |
| GSTT2B    | 0.011221005 | -0.51650693 | 0.233955849 | 0.815022345 | 0.88691253  | -7.06825457 | ns |
| VPS28     | -0.00315873 | 0.065348707 | -0.23394535 | 0.81503054  | 0.88691253  | -7.06083196 | ns |
| RAD23B    | -0.00227002 | 0.020030052 | -0.23368778 | 0.815230559 | 0.88691253  | -7.0546512  | ns |
| CYP24A1   | 0.003995828 | 0.218778828 | 0.233102446 | 0.815685029 | 0.887076456 | -7.05382632 | ns |
| CRHR1     | 0.003079725 | 0.068512175 | 0.231682116 | 0.816788069 | 0.887514755 | -7.05578388 | ns |
| STEAP4    | 0.003408187 | 0.136177115 | 0.231617803 | 0.816838022 | 0.887514755 | -7.05603775 | ns |
| RHOC      | 0.005910689 | -0.14197442 | 0.231368358 | 0.817031765 | 0.887514755 | -7.05848161 | ns |
| VSTM2L    | -0.00284348 | 0.021654526 | -0.22964    | 0.81837464  | 0.887514755 | -7.05625169 | ns |
| TRIM26    | 0.002567263 | 0.028640413 | 0.229092924 | 0.818799812 | 0.887514755 | -7.05352965 | ns |
| OPHN1     | 0.005052143 | -0.01509244 | 0.228899689 | 0.818949902 | 0.887514755 | -7.06941689 | ns |
| KIAA1549L | 0.001293956 | 0.009595429 | 0.228338945 | 0.819385808 | 0.887514755 | -7.06211906 | ns |
| FGF20     | 0.001982447 | 0.08274584  | 0.228299726 | 0.819416342 | 0.887514755 | -7.05458169 | ns |
| MMUT      | 0.002321652 | 0.052119822 | 0.228268383 | 0.819440707 | 0.887514755 | -7.05493381 | ns |
| CST6      | -0.00232406 | -0.00076379 | -0.2281319  | 0.819546835 | 0.887514755 | -7.05023694 | ns |
| CEACAM20  | -0.00202903 | 0.044162581 | -0.22806611 | 0.819597903 | 0.887514755 | -7.0621809  | ns |
| ARL2BP    | 0.001868906 | 0.02596605  | 0.227889333 | 0.819735375 | 0.887514755 | -7.05501967 | ns |
| NCS1      | 0.001341449 | -0.0294056  | 0.226997158 | 0.820428942 | 0.887936438 | -7.07169403 | ns |
| DUSP3     | 0.004183724 | 0.133040328 | 0.225196576 | 0.821829407 | 0.88896485  | -7.05682833 | ns |
| PRC1      | 0.002075531 | 0.072129964 | 0.224992549 | 0.821988046 | 0.88896485  | -7.06953632 | ns |
| MST1      | -0.00295656 | -0.17445556 | -0.22246597 | 0.823954149 | 0.890761242 | -7.06198322 | ns |
| LAMP1     | 0.001242576 | 0.021496303 | 0.221113418 | 0.825007125 | 0.891453884 | -7.05701363 | ns |

|         |             |             |             |             |             |             |    |
|---------|-------------|-------------|-------------|-------------|-------------|-------------|----|
| KLRC1   | 0.002682352 | 0.097034294 | 0.220858725 | 0.825205427 | 0.891453884 | -7.05845521 | ns |
| DEFB118 | 0.002572394 | 0.098682971 | 0.218627693 | 0.826943038 | 0.893000618 | -7.05894211 | ns |
| CA13    | -0.00492546 | -0.11725211 | -0.21800793 | 0.827425849 | 0.893191674 | -7.06454039 | ns |
| LILRB1  | -0.00129707 | -0.02574908 | -0.21751523 | 0.827809697 | 0.893275801 | -7.07278033 | ns |
| IL15    | -0.0015075  | -0.02098871 | -0.2162956  | 0.828760217 | 0.893971125 | -7.06828203 | ns |
| CACNA1H | 0.002497497 | 0.101908115 | 0.215070854 | 0.829714995 | 0.894670526 | -7.0578392  | ns |
| GALNT10 | 0.001260385 | -0.01727252 | 0.21315376  | 0.831209874 | 0.895724404 | -7.06644269 | ns |
| SPINK8  | 0.001627634 | 0.036054929 | 0.213030748 | 0.831305868 | 0.895724404 | -7.05827288 | ns |
| KIF20B  | 0.003294037 | 0.062821701 | 0.212491858 | 0.831726201 | 0.895846738 | -7.06025569 | ns |
| PPIF    | -0.00262617 | 0.089731501 | -0.21170477 | 0.832340157 | 0.896177455 | -7.07302256 | ns |
| SCG2    | -0.00139238 | 0.003569741 | -0.21123355 | 0.832707821 | 0.896242845 | -7.07288801 | ns |
| LSM1    | 0.002467359 | 0.064676575 | 0.209753073 | 0.833863241 | 0.89703938  | -7.05992162 | ns |
| NXPE4   | -0.00143628 | 0.033016579 | -0.20949804 | 0.834062301 | 0.89703938  | -7.05901409 | ns |
| NOTCH1  | -0.00069202 | 0.001643544 | -0.20908308 | 0.834386128 | 0.897057251 | -7.07456692 | ns |
| TREML1  | -0.00219807 | 0.037420251 | -0.20794217 | 0.835276855 | 0.897684364 | -7.07304701 | ns |
| C2CD2L  | 0.001890029 | 0.003650349 | 0.205111995 | 0.837487402 | 0.899516436 | -7.05984167 | ns |
| CCT5    | -0.00204098 | 0.05462942  | -0.20497086 | 0.837597668 | 0.899516436 | -7.06090647 | ns |
| DNAJA1  | 0.001859054 | 0.037094083 | 0.203027818 | 0.839116039 | 0.900624033 | -7.0591225  | ns |
| EDAR    | -0.00406353 | 0.052893438 | -0.20273915 | 0.839341608 | 0.900624033 | -7.07110324 | ns |
| PPT1    | 0.003194375 | 0.199648092 | 0.202467075 | 0.839554321 | 0.900624033 | -7.06165721 | ns |
| GSAP    | 0.003737195 | 0.246874791 | 0.196329715 | 0.844354757 | 0.905441017 | -7.06262843 | ns |
| KIR2DL2 | -0.00330949 | -0.03595269 | -0.19547397 | 0.845024484 | 0.905826539 | -7.07570064 | ns |
| PRDX5   | -0.00288471 | -0.12997699 | -0.19494246 | 0.845440541 | 0.905916224 | -7.0779549  | ns |
| LCN15   | 0.002345506 | 0.050378763 | 0.194574467 | 0.845728639 | 0.905916224 | -7.0776699  | ns |
| ATXN10  | 0.002995771 | -0.02471162 | 0.193839576 | 0.846304111 | 0.906200221 | -7.06335316 | ns |
| CCDC134 | -0.00185871 | 0.025800602 | -0.19343221 | 0.846623037 | 0.90620941  | -7.07609501 | ns |
| SUGT1   | 0.003366655 | -0.02594051 | 0.192645311 | 0.847239357 | 0.906491771 | -7.06334009 | ns |
| CASP3   | 0.003633613 | -0.05198916 | 0.191780029 | 0.847917026 | 0.906491771 | -7.0780119  | ns |
| SLA2    | -0.00400756 | -0.03263214 | -0.19128826 | 0.848302257 | 0.906491771 | -7.07829969 | ns |
| HRG     | -0.00122334 | -0.0149451  | -0.19114321 | 0.848415914 | 0.906491771 | -7.07366424 | ns |
| KITLG   | 0.001497887 | -0.01029371 | 0.190839242 | 0.848654073 | 0.906491771 | -7.07121064 | ns |
| NDST1   | -0.00242339 | 0.123615671 | -0.19071743 | 0.848749487 | 0.906491771 | -7.07661297 | ns |
| AHSA1   | -0.00255963 | 0.104091082 | -0.1890244  | 0.850076174 | 0.907576756 | -7.07693228 | ns |
| TRIM21  | -0.00311344 | 0.002997749 | -0.18834545 | 0.850608353 | 0.907813009 | -7.07389889 | ns |
| ASRGL1  | 0.00384164  | 0.018850975 | 0.186930757 | 0.851717439 | 0.908664568 | -7.06439009 | ns |
| RABEPK  | -0.00238378 | 0.093189341 | -0.18523046 | 0.853050775 | 0.909754661 | -7.06473143 | ns |
| DARS1   | 0.002888173 | -0.04285026 | 0.181547127 | 0.855940561 | 0.912503264 | -7.07082002 | ns |
| CD40LG  | -0.00304756 | -0.04097146 | -0.18089111 | 0.856455405 | 0.912718899 | -7.08057781 | ns |
| PECR    | 0.001029271 | 0.021820899 | 0.178997073 | 0.857942405 | 0.913970019 | -7.06583171 | ns |
| NPTX2   | -0.0011598  | -0.01579928 | -0.17647638 | 0.859922014 | 0.915744815 | -7.07981443 | ns |
| CYTH3   | 0.002605501 | 0.122892007 | 0.174606243 | 0.861391396 | 0.916975164 | -7.06445202 | ns |
| CTLA4   | 0.001028494 | -0.0199997  | 0.173235439 | 0.862468633 | 0.917787321 | -7.08037734 | ns |
| DYNLT3  | -0.00151616 | 0.022529993 | -0.1727206  | 0.862873309 | 0.917883447 | -7.07986148 | ns |
| EPO     | -0.00275365 | 0.072446807 | -0.16910586 | 0.865715604 | 0.920571581 | -7.07731438 | ns |
| H2AP    | 0.001737845 | 0.062393304 | 0.166283201 | 0.867936323 | 0.92258215  | -7.06586087 | ns |
| TPSD1   | -0.001222   | 0.031378876 | -0.16589941 | 0.86823827  | 0.92258215  | -7.08280379 | ns |
| PDCD6   | 0.00251544  | -0.18521749 | 0.165371392 | 0.868653853 | 0.92258635  | -7.07571596 | ns |
| PCARE   | -0.00278447 | 0.190017493 | -0.16507483 | 0.868887297 | 0.92258635  | -7.06914597 | ns |
| NECAP2  | -0.00220703 | 0.090447479 | -0.16469015 | 0.869190085 | 0.92258635  | -7.06733979 | ns |
| CRIM1   | 0.000687614 | -0.01135655 | 0.163746654 | 0.869932735 | 0.922845173 | -7.07954225 | ns |
| TNN     | 0.001415738 | 0.013738185 | 0.163577347 | 0.870066014 | 0.922845173 | -7.08199297 | ns |
| TRAF2   | 0.002478588 | 0.053272983 | 0.162201213 | 0.87114954  | 0.923658917 | -7.07845047 | ns |
| PRRT3   | 0.001195367 | 0.015882938 | 0.161666127 | 0.871570947 | 0.923770296 | -7.06876348 | ns |
| NMI     | -0.002319   | 0.040922428 | -0.16064574 | 0.872374534 | 0.924128588 | -7.07942471 | ns |
| GSN     | 0.000588227 | 0.004596979 | 0.160433177 | 0.872541958 | 0.924128588 | -7.08003786 | ns |
| CD248   | -0.00125059 | 0.007250087 | -0.15748648 | 0.874863515 | 0.926251437 | -7.08296422 | ns |
| IDS     | 0.000294448 | -0.00462316 | 0.155786847 | 0.876203063 | 0.927333434 | -7.08477572 | ns |
| TPMT    | 0.002403096 | 0.073347866 | 0.154198263 | 0.87745548  | 0.928322465 | -7.06996193 | ns |
| PDCL2   | -0.0016404  | 0.067610293 | -0.15346253 | 0.878035597 | 0.928599762 | -7.06789643 | ns |
| CMIP    | 0.0025477   | 0.014338264 | 0.15240149  | 0.878872272 | 0.928748726 | -7.08314251 | ns |
| CLEC10A | -0.00116934 | -0.01148855 | -0.15238307 | 0.878886822 | 0.928748726 | -7.07691808 | ns |
| DDA1    | 0.001242079 | 0.034767663 | 0.152073959 | 0.879130644 | 0.928748726 | -7.06932424 | ns |
| LAG3    | 0.001275429 | 0.011541399 | 0.148404656 | 0.882025382 | 0.931231114 | -7.07806887 | ns |
| EPPK1   | -0.00216525 | 0.027879247 | -0.14828399 | 0.88212063  | 0.931231114 | -7.07082315 | ns |
| VCAM1   | 0.000839159 | 0.000291885 | 0.147882867 | 0.882437155 | 0.931231114 | -7.07957848 | ns |
| TBR1    | -0.00143393 | 0.082587646 | -0.14715534 | 0.883011372 | 0.931340921 | -7.07126005 | ns |

|             |             |             |             |             |             |             |    |
|-------------|-------------|-------------|-------------|-------------|-------------|-------------|----|
| CCDC50      | -0.00227395 | 0.154310522 | -0.14653776 | 0.883498786 | 0.931340921 | -7.08580831 | ns |
| CHEK2       | -0.00102116 | -0.00418134 | -0.14637869 | 0.883624405 | 0.931340921 | -7.0717984  | ns |
| ENOX2       | 0.000813731 | 0.017814115 | 0.146134694 | 0.883817018 | 0.931340921 | -7.07020373 | ns |
| GIPC3       | -0.00287843 | -0.09430871 | -0.14549292 | 0.884323603 | 0.931428678 | -7.08382594 | ns |
| DCTN2       | -0.00284978 | 0.080828497 | -0.14521349 | 0.884544231 | 0.931428678 | -7.0785342  | ns |
| RICTOR      | 0.001414255 | 0.077930817 | 0.144817071 | 0.884857244 | 0.931428678 | -7.07004901 | ns |
| PLCB2       | -0.00282747 | -0.04359001 | -0.1442985  | 0.885266638 | 0.931445768 | -7.08509807 | ns |
| APRT        | -0.00150162 | -0.04580861 | -0.14398849 | 0.885511456 | 0.931445768 | -7.07815362 | ns |
| TARM1       | -0.00223218 | 0.174656274 | -0.14279877 | 0.886451012 | 0.932098291 | -7.07188733 | ns |
| AGBL2       | 0.002629544 | -0.08226005 | 0.142020295 | 0.887065872 | 0.932370333 | -7.07266171 | ns |
| UBE2B       | -0.00082354 | 0.012489597 | -0.14115596 | 0.887748573 | 0.932370333 | -7.08478209 | ns |
| TIMP2       | -0.00071005 | -0.00708621 | -0.14102606 | 0.887851192 | 0.932370333 | -7.08581004 | ns |
| FH          | -0.0024034  | 0.175841777 | -0.14085427 | 0.887986951 | 0.932370333 | -7.0728255  | ns |
| CPVL        | 0.001214998 | -0.04548448 | 0.137301588 | 0.8907942   | 0.934874999 | -7.08672105 | ns |
| SOD3        | 0.001658864 | 0.093856886 | 0.136669596 | 0.89129374  | 0.934874999 | -7.08524562 | ns |
| ADRA2A      | -0.00201552 | 0.188818132 | -0.13662015 | 0.891332876 | 0.934874999 | -7.07153963 | ns |
| ATP5F1D     | -0.00144974 | 0.04692515  | -0.13285207 | 0.894312153 | 0.937663012 | -7.07204384 | ns |
| IL12RB2     | 0.001113927 | 0.076340952 | 0.130903138 | 0.895853684 | 0.938942124 | -7.071954   | ns |
| BCAT1       | 0.000776605 | 0.004959264 | 0.12940615  | 0.897037962 | 0.939825749 | -7.08737077 | ns |
| CTAG1A_CTAG | 0.001311227 | 0.01151326  | 0.129023858 | 0.897340475 | 0.939825749 | -7.07820662 | ns |
| HRAS        | -0.00247223 | 0.270112446 | -0.12759569 | 0.898470625 | 0.940672006 | -7.07902224 | ns |
| EGFR        | -0.00042558 | 0.012870119 | -0.12459894 | 0.900842686 | 0.942583072 | -7.08856847 | ns |
| HSPB1       | -0.00186073 | -0.14338851 | -0.12417301 | 0.901179953 | 0.942583072 | -7.07388264 | ns |
| CBX2        | -0.00098946 | 0.065873713 | -0.1240664  | 0.901264362 | 0.942583072 | -7.07316469 | ns |
| CLIC5       | 0.000748007 | 0.025628319 | 0.120605338 | 0.904005244 | 0.944991231 | -7.07479022 | ns |
| NEO1        | 0.00053746  | 0.00300611  | 0.12034147  | 0.904214212 | 0.944991231 | -7.08928066 | ns |
| KLK12       | -0.00356832 | -0.54089191 | -0.11986525 | 0.904591497 | 0.945047289 | -7.07463439 | ns |
| PTEN        | -0.00073312 | -0.00554402 | -0.11564258 | 0.90793736  | 0.94807646  | -7.07537053 | ns |
| EPGN        | 0.001111054 | 0.100676841 | 0.115386394 | 0.908140362 | 0.94807646  | -7.0880655  | ns |
| PMVK        | -0.00273293 | -0.30859416 | -0.11446988 | 0.908866851 | 0.948495785 | -7.07407338 | ns |
| EDNRB       | -0.00104246 | 0.062912895 | -0.11347762 | 0.909653424 | 0.948673771 | -7.0740686  | ns |
| COMMD9      | -0.00089081 | 0.046024029 | -0.11312179 | 0.909935467 | 0.948673771 | -7.08832251 | ns |
| DEFB103A_DE | -0.00093958 | 0.035581048 | -0.11289429 | 0.910115887 | 0.948673771 | -7.06957457 | ns |
| SOWAHA      | 0.001115793 | 0.065157369 | 0.11261542  | 0.910336955 | 0.948673771 | -7.07571554 | ns |
| PLCB1       | -0.00102002 | 0.069120084 | -0.11147322 | 0.911242591 | 0.94927876  | -7.07429249 | ns |
| MAPKAPK2    | 0.001617664 | 0.020175084 | 0.10882726  | 0.913340932 | 0.950725527 | -7.08213028 | ns |
| OSBPL2      | 0.000838997 | 0.06493277  | 0.108664551 | 0.913469966 | 0.950725527 | -7.08957504 | ns |
| MRPL52      | -0.00055553 | -0.00228687 | -0.10849038 | 0.913608161 | 0.950725527 | -7.07229528 | ns |
| SESTD1      | 0.001494084 | 0.061696307 | 0.107884684 | 0.914088603 | 0.950886612 | -7.07623164 | ns |
| GBP2        | -0.00136836 | -0.01985941 | -0.10725368 | 0.914589157 | 0.951068497 | -7.07649646 | ns |
| FGD3        | 0.001721498 | 0.024898097 | 0.106164664 | 0.915453078 | 0.951627977 | -7.09087554 | ns |
| NEB         | -0.00079752 | 0.034835709 | -0.10573206 | 0.915796354 | 0.951646034 | -7.07525682 | ns |
| NOS2        | -0.00083875 | 0.013017128 | -0.10383139 | 0.917304542 | 0.95287416  | -7.07545461 | ns |
| RNF5        | -0.00150023 | -0.09088716 | -0.10268476 | 0.918214532 | 0.953426098 | -7.07650592 | ns |
| GRAP2       | -0.00284401 | -0.10292451 | -0.10233904 | 0.918488909 | 0.953426098 | -7.08409619 | ns |
| CRKL        | -0.00236038 | -0.08170865 | -0.10172381 | 0.918977229 | 0.953593998 | -7.08600784 | ns |
| EDEM2       | -0.00073864 | 0.051127624 | -0.09976876 | 0.920529242 | 0.954571462 | -7.07586535 | ns |
| IL24        | -0.00103854 | 0.030004918 | -0.0997136  | 0.920573027 | 0.954571462 | -7.07727139 | ns |
| HTRA2       | 0.001261381 | 0.025624336 | 0.095153292 | 0.924194304 | 0.957658591 | -7.08898317 | ns |
| DNM1        | 0.002184268 | -0.09300698 | 0.095138397 | 0.924206133 | 0.957658591 | -7.08984388 | ns |
| BTN1A1      | 0.000744845 | 0.047315714 | 0.093974664 | 0.925130504 | 0.958276365 | -7.08930209 | ns |
| TYMP        | -0.00134104 | -0.02481184 | -0.09355524 | 0.925463698 | 0.958281559 | -7.08237511 | ns |
| ADCYAP1R1   | -0.00067754 | 0.027351203 | -0.09229623 | 0.926463916 | 0.958977183 | -7.07753888 | ns |
| RAB33A      | -0.00121333 | 0.04945868  | -0.08925757 | 0.928878405 | 0.961135699 | -7.07685197 | ns |
| ERBB3       | -0.00035803 | 0.004432797 | -0.0866875  | 0.930921053 | 0.962908068 | -7.08415614 | ns |
| MEGF11      | 0.000570725 | 0.039142756 | 0.085831427 | 0.931601567 | 0.9631244   | -7.07714985 | ns |
| MN1         | -0.00100935 | 0.082549626 | -0.08559454 | 0.931789873 | 0.9631244   | -7.0783751  | ns |
| SLK         | -0.00137477 | 0.186272559 | -0.08480585 | 0.932416855 | 0.963431429 | -7.08444021 | ns |
| YES1        | -0.00204993 | -0.03419532 | -0.08257828 | 0.934187949 | 0.96491999  | -7.08561989 | ns |
| CALY        | -0.00060638 | 0.022474385 | -0.08131764 | 0.935190426 | 0.965339796 | -7.0775245  | ns |
| HK2         | -0.00046415 | -0.00680668 | -0.08123571 | 0.935255577 | 0.965339796 | -7.07916139 | ns |
| PTPRH       | 0.000771961 | 0.034601966 | 0.080397066 | 0.935922501 | 0.96568682  | -7.09112904 | ns |
| BNIP2       | 0.000546074 | 0.009900216 | 0.079715526 | 0.936464541 | 0.96580648  | -7.09253182 | ns |
| DRG2        | 0.000974739 | 0.044038546 | 0.079143324 | 0.936919659 | 0.96580648  | -7.08589577 | ns |
| PAK4        | -0.00103946 | 0.074696987 | -0.07889306 | 0.937118734 | 0.96580648  | -7.07892058 | ns |
| VTA1        | -0.00121413 | 0.019069895 | -0.07858781 | 0.937361494 | 0.96580648  | -7.0935594  | ns |

|           |              |             |             |             |             |             |    |
|-----------|--------------|-------------|-------------|-------------|-------------|-------------|----|
| CRX       | -0.00183673  | 0.339559902 | -0.07782938 | 0.937964813 | 0.966087215 | -7.07943045 | ns |
| SPP1      | 0.000732484  | -0.01950902 | 0.076657523 | 0.938896987 | 0.966706348 | -7.09236657 | ns |
| PNPT1     | 0.002000281  | 0.41178701  | 0.075684747 | 0.939670914 | 0.967162167 | -7.07936426 | ns |
| CDC123    | -0.00095649  | 0.071682469 | -0.072724   | 0.942026719 | 0.969156897 | -7.07696455 | ns |
| BHLHE40   | 0.001031449  | 0.084472553 | 0.072414822 | 0.94227275  | 0.969156897 | -7.08007357 | ns |
| MUCL3     | 0.000641328  | 0.075296659 | 0.070697575 | 0.943639392 | 0.969770165 | -7.07710886 | ns |
| GART      | 0.000382427  | 0.018293948 | 0.070436259 | 0.94384734  | 0.969770165 | -7.09400937 | ns |
| IMPA1     | 0.000922742  | 0.039305942 | 0.070278201 | 0.943973153 | 0.969770165 | -7.08599703 | ns |
| IL9       | 0.000793471  | 0.088876583 | 0.069873458 | 0.944295294 | 0.969770165 | -7.08558725 | ns |
| PSCA      | -0.00358042  | -1.29913264 | -0.0692634  | 0.944780854 | 0.969770165 | -7.09195661 | ns |
| SLC44A4   | 0.000952654  | 0.144008815 | 0.069161875 | 0.944861685 | 0.969770165 | -7.07963792 | ns |
| DCBLD2    | -0.00047632  | -0.02543758 | -0.06629527 | 0.94714361  | 0.971770675 | -7.09129711 | ns |
| CBLIF     | 0.000946504  | 0.023234483 | 0.063499609 | 0.949369501 | 0.973712309 | -7.08668475 | ns |
| ARNTL     | -0.00065294  | 0.106952634 | -0.06176294 | 0.950752437 | 0.974788314 | -7.07891384 | ns |
| SMPDL3A   | -0.0008537   | -0.0438468  | -0.06084063 | 0.951486925 | 0.974932868 | -7.09042558 | ns |
| ENO1      | -0.00101479  | -0.04632522 | -0.0596618  | 0.952425777 | 0.974932868 | -7.08933537 | ns |
| MAEA      | -0.0005031   | 0.026024076 | -0.05951291 | 0.952544377 | 0.974932868 | -7.08001023 | ns |
| S100A3    | 0.000518586  | 0.060646191 | 0.059100394 | 0.952872909 | 0.974932868 | -7.09294328 | ns |
| NGF       | -0.0001513   | -0.00377047 | -0.05877605 | 0.953131257 | 0.974932868 | -7.08673421 | ns |
| PLA2G4A   | 0.001113623  | -0.02162898 | 0.058321699 | 0.95349314  | 0.974932868 | -7.09116954 | ns |
| IL17F     | -0.00098328  | 0.155523911 | -0.05824426 | 0.953554838 | 0.974932868 | -7.08052416 | ns |
| NEK7      | 0.000873993  | 0.112703258 | 0.058232147 | 0.953564477 | 0.974932868 | -7.08632786 | ns |
| ATF4      | 0.000401328  | 0.019725045 | 0.05760879  | 0.954061014 | 0.975099112 | -7.07794277 | ns |
| CD1C      | 0.000279515  | -0.00175217 | 0.055424933 | 0.95580065  | 0.976535303 | -7.09195425 | ns |
| GATA3     | 0.000287299  | -0.00430468 | 0.054250543 | 0.956736274 | 0.977149325 | -7.0781293  | ns |
| KRT8      | 0.000653344  | 0.035507696 | 0.053636748 | 0.957225288 | 0.977306938 | -7.08124898 | ns |
| TPT1      | 0.000737509  | 0.091322776 | 0.051794316 | 0.958693269 | 0.978463595 | -7.0808766  | ns |
| MANF      | -0.0013277   | -0.25297915 | -0.05091321 | 0.959395342 | 0.978791374 | -7.09157146 | ns |
| CTSC      | -0.00045397  | 0.006153173 | -0.05054992 | 0.95968483  | 0.978791374 | -7.08785396 | ns |
| RNF31     | -0.00036116  | 0.023818947 | -0.04901717 | 0.960906261 | 0.979608166 | -7.07926985 | ns |
| EPB41L5   | 0.000625855  | 0.057211143 | 0.048702983 | 0.961156642 | 0.979608166 | -7.08083535 | ns |
| TYRO3     | -0.00028675  | -0.01199441 | -0.04698403 | 0.962526568 | 0.980466644 | -7.08820117 | ns |
| PPY       | -0.0010222   | 0.035545384 | -0.04680343 | 0.962670503 | 0.980466644 | -7.09183814 | ns |
| ACSL1     | 0.000339506  | 0.04898679  | 0.045521734 | 0.963692056 | 0.981164855 | -7.07977907 | ns |
| TNPO1     | 0.000321388  | 0.009632085 | 0.04472832  | 0.964324445 | 0.981466497 | -7.08701834 | ns |
| SLAMF1    | -0.000561    | -0.07847509 | -0.04395534 | 0.964940587 | 0.981751398 | -7.08124932 | ns |
| PAPPA     | -0.00042527  | -0.02010484 | -0.04297044 | 0.965725662 | 0.981765724 | -7.08129183 | ns |
| SAP18     | 0.00062727   | 0.092825761 | 0.042703692 | 0.965938295 | 0.981765724 | -7.08710625 | ns |
| SPINT3    | -0.00125953  | 0.982776912 | -0.04267228 | 0.965963331 | 0.981765724 | -7.09343491 | ns |
| C1GALT1C1 | 0.000263961  | 0.008485413 | 0.040591519 | 0.967622084 | 0.983109425 | -7.07998989 | ns |
| REPS1     | -0.00030766  | 0.031770094 | -0.03906501 | 0.968839079 | 0.984003517 | -7.07970514 | ns |
| SHH       | -0.00033705  | 0.006178161 | -0.03857082 | 0.969233081 | 0.984061404 | -7.07972419 | ns |
| PDGFRB    | -0.00027836  | -0.0410986  | -0.03685902 | 0.970597892 | 0.985104569 | -7.09560445 | ns |
| LYAR      | 0.000419385  | 0.053242901 | 0.035408343 | 0.971754602 | 0.985755189 | -7.0811464  | ns |
| TBCB      | 0.000770421  | -0.11186307 | 0.035208297 | 0.971914106 | 0.985755189 | -7.08783422 | ns |
| RUVBL1    | 0.000776078  | 0.285223451 | 0.034152336 | 0.972756128 | 0.98626663  | -7.08118979 | ns |
| ITGA2     | -0.0002224   | 0.018631455 | -0.0328887  | 0.973763779 | 0.986859787 | -7.08202787 | ns |
| SCN3A     | 0.000242024  | 0.037731567 | 0.032532127 | 0.974048126 | 0.986859787 | -7.08148767 | ns |
| BCL7B     | -0.00029677  | 0.057095201 | -0.03158296 | 0.974805039 | 0.986859787 | -7.09418263 | ns |
| NT5C      | 0.000471461  | 0.006915487 | 0.031483917 | 0.974884024 | 0.986859787 | -7.09519561 | ns |
| ELOB      | -0.00023815  | 0.021645314 | -0.03040103 | 0.975747627 | 0.986859787 | -7.08034913 | ns |
| WASF3     | -0.00054597  | -0.02752928 | -0.03029583 | 0.975831524 | 0.986859787 | -7.08155554 | ns |
| AKT2      | -0.00075642  | -0.03975172 | -0.02975337 | 0.976264129 | 0.986859787 | -7.09603381 | ns |
| CEACAM3   | -0.00029379  | 0.01329305  | -0.02938556 | 0.976557479 | 0.986859787 | -7.08134019 | ns |
| LRTM1     | 0.000245889  | 0.042338354 | 0.029304057 | 0.976622478 | 0.986859787 | -7.08158679 | ns |
| TEX101    | 0.000288222  | 0.099581517 | 0.029180754 | 0.976720816 | 0.986859787 | -7.08159037 | ns |
| IL36A     | -0.00032175  | 0.067156102 | -0.02844779 | 0.977305383 | 0.987108861 | -7.08006107 | ns |
| TPPP2     | -0.00043107  | 0.081118914 | -0.02708077 | 0.978395663 | 0.987868374 | -7.08764768 | ns |
| TBL1X     | 0.000481207  | -0.04315182 | 0.025953924 | 0.979294434 | 0.988434064 | -7.08143449 | ns |
| PDIA2     | 0.000180352  | 0.033149884 | 0.021862613 | 0.982557839 | 0.991385241 | -7.07935339 | ns |
| NARS1     | -0.00019117  | -0.05037414 | -0.02000806 | 0.984037198 | 0.992534928 | -7.09627467 | ns |
| PRKAG3    | -0.00012437  | 0.025996868 | -0.01898648 | 0.984852141 | 0.992712462 | -7.0818342  | ns |
| THAP12    | 0.000350161  | 0.18956309  | 0.018850664 | 0.984960488 | 0.992712462 | -7.0778704  | ns |
| RAC3      | -0.00025318  | 0.160196769 | -0.0185089  | 0.985233122 | 0.992712462 | -7.0818431  | ns |
| PSMC3     | -0.00010575  | 0.012868642 | -0.01706404 | 0.986385752 | 0.993531009 | -7.07944614 | ns |
| ENPP2     | 9.0744968675 | 0.021937929 | 0.016050079 | 0.987194646 | 0.993982905 | -7.09615128 | ns |

|          |              |             |             |             |             |             |    |
|----------|--------------|-------------|-------------|-------------|-------------|-------------|----|
| CD226    | -0.00013011  | 0.018159776 | -0.01564826 | 0.987515208 | 0.993982905 | -7.08034134 | ns |
| SH3BGR2  | -0.00018254  | 0.113726286 | -0.01468972 | 0.988279915 | 0.994409839 | -7.08257043 | ns |
| AKR1B10  | -0.00016798  | 0.019895561 | -0.01396623 | 0.988857107 | 0.994607191 | -7.08191635 | ns |
| DAPP1    | 0.00035727   | -0.27996901 | 0.013589964 | 0.989157288 | 0.994607191 | -7.09142493 | ns |
| ITGB1BP2 | -0.00029718  | -0.09242788 | -0.0123934  | 0.990111914 | 0.995224368 | -7.08236215 | ns |
| NAA10    | 0.000121365  | -0.00064846 | 0.011884909 | 0.990517595 | 0.99527214  | -7.08073793 | ns |
| BRAP     | -0.00025303  | -0.07880488 | -0.01147938 | 0.990841134 | 0.99527214  | -7.08955563 | ns |
| ICAM3    | -5.86E-05    | -0.01010071 | -0.01069428 | 0.991467501 | 0.995558839 | -7.09622242 | ns |
| ADAMTS1  | -5.23E-05    | -0.00245939 | -0.00835831 | 0.993331223 | 0.996703413 | -7.08042824 | ns |
| PBLD     | -9.21E-05    | 0.022806931 | -0.00833678 | 0.993348402 | 0.996703413 | -7.0819768  | ns |
| IGFBP7   | 4.6194056785 | -0.01732856 | 0.007757623 | 0.993810474 | 0.996703413 | -7.09624933 | ns |
| BCL7A    | -9.47E-05    | 0.052545431 | -0.00747032 | 0.994039706 | 0.996703413 | -7.07956302 | ns |
| IL1R1    | -3.30E-05    | -0.01258122 | -0.00712645 | 0.994314055 | 0.996703413 | -7.09069461 | ns |
| GPR15L   | -6.68E-05    | -0.06430246 | -0.00550806 | 0.995605299 | 0.997655276 | -7.09432422 | ns |
| ISM2     | 2.7987201173 | 0.006836245 | 0.003272635 | 0.997388862 | 0.999099649 | -7.09527716 | ns |
| AGR3     | -3.37E-05    | 0.008485074 | -0.00260714 | 0.997919838 | 0.999288727 | -7.08091329 | ns |
| HPGDS    | 1.6601369132 | 0.012222108 | 0.00209735  | 0.998326586 | 0.999353319 | -7.0817668  | ns |
| RPA2     | -7.66E-06    | 0.022340899 | -0.00123076 | 0.999018009 | 0.999702737 | -7.08046218 | ns |
| TYRP1    | -3.68E-06    | -0.04533902 | -0.00029764 | 0.99976252  | 0.999800741 | -7.08046289 | ns |
| TNFRSF21 | -1.38E-06    | -0.00547418 | -0.00024974 | 0.999800741 | 0.999800741 | -7.09662684 | ns |

#### Health-conscious vs Sweet-tooth

|          | logFC       | AveExpr     | t           | P.Value      | adj.P.Val    | B           | protein_type |
|----------|-------------|-------------|-------------|--------------|--------------|-------------|--------------|
| CFH      | -0.09397966 | -0.04566867 | -16.1634056 | 2.9367184728 | 8.5752179408 | 121.5526319 | ns           |
| LEP      | -0.35882666 | -0.17409801 | -15.7261954 | 2.7092842372 | 3.955549863  | 114.8007534 | down         |
| SERPINF1 | -0.08677468 | -0.03790164 | -14.269743  | 6.6704551180 | 6.4925763148 | 93.38929077 | ns           |
| HGF      | -0.11998452 | -0.04313962 | -14.2415434 | 9.8177174269 | 7.1669337217 | 93.00755069 | ns           |
| RARRES2  | -0.16668028 | -0.0752127  | -14.0820383 | 9.2870216015 | 5.4236206153 | 90.78334709 | ns           |
| APCS     | -0.11375804 | -0.08561453 | -13.716694  | 1.4379768904 | 6.9981541999 | 85.79394951 | ns           |
| TNFRSF1A | -0.08712003 | -0.02483846 | -13.6603332 | 3.0911189037 | 1.1416051802 | 85.03683191 | ns           |
| IL1RN    | -0.18662727 | -0.00163616 | -13.65964   | 3.1276854252 | 1.1416051802 | 85.02517927 | ns           |
| FSTL3    | -0.09611796 | -0.0245828  | -13.4667553 | 4.2063760520 | 1.3647353413 | 82.45431684 | ns           |
| CFI      | -0.06399492 | -0.0294017  | -13.4494888 | 5.2650610434 | 1.5373978246 | 82.23207826 | ns           |
| INHBC    | -0.14162588 | -0.10462579 | -13.4080919 | 9.1874997595 | 2.4388635725 | 81.68149838 | ns           |
| FABP4    | -0.18421798 | -0.0562609  | -13.3838427 | 1.2628404207 | 3.0729116905 | 81.36667903 | ns           |
| ADM      | -0.09031473 | -0.05568744 | -13.3578998 | 1.7822749323 | 4.0032636940 | 81.02583918 | ns           |
| IL18R1   | -0.10605834 | -0.03755503 | -13.3323925 | 2.4990341112 | 5.2122711462 | 80.6915249  | ns           |
| REL1     | -0.08116719 | -0.03067685 | -13.3246015 | 2.7857119510 | 5.4228525980 | 80.58435599 | ns           |
| GFRA1    | -0.08174504 | -0.0221911  | -13.2118715 | 1.2273681243 | 2.2399468269 | 79.11739546 | ns           |
| GGH      | -0.11031756 | -0.04112374 | -13.1207329 | 4.1095849388 | 7.0588164832 | 77.92335686 | ns           |
| CST3     | -0.08172858 | -0.04064463 | -13.0024954 | 1.8917268624 | 3.0688013546 | 76.41312978 | ns           |
| CSF1     | -0.07815317 | -0.0134698  | -12.9089821 | 6.2977617667 | 9.6786654519 | 75.22365523 | ns           |
| BPIFB2   | -0.18113721 | 0.05996641  | -12.4114864 | 3.3315487470 | 4.8640611707 | 69.02453044 | ns           |
| STC1     | -0.12433762 | -0.02194037 | -12.3193618 | 1.0355012971 | 1.4398398989 | 67.90346501 | ns           |
| EPHA1    | -0.09676917 | -0.0608638  | -12.3025159 | 1.2768088164 | 1.6946735200 | 67.69732196 | ns           |
| ASGR1    | -0.08774745 | -0.04427822 | -12.293124  | 1.4368455233 | 1.8241690991 | 67.58135467 | ns           |
| CD99L2   | -0.0696962  | -0.01799669 | -12.2704056 | 1.8929949048 | 2.3031438009 | 67.30824647 | ns           |
| TGFBR2   | -0.08433502 | -0.01406392 | -12.24587   | 2.5507253612 | 2.9660983587 | 67.0132767  | ns           |
| NTRK3    | 0.063418734 | 0.014814134 | 12.24288267 | 2.6410464837 | 2.9660983587 | 66.97826177 | ns           |
| NHLRC3   | -0.08548313 | -0.04392814 | -12.2062628 | 4.2008147539 | 4.5431033635 | 66.52456576 | ns           |
| SEMA3F   | -0.07613625 | -0.02214061 | -12.1963912 | 4.6749792013 | 4.8753354528 | 66.41549173 | ns           |
| COLEC12  | -0.07191936 | -0.03369293 | -12.1571547 | 7.5247042097 | 7.5765987215 | 65.94525821 | ns           |
| COL6A3   | -0.09219235 | -0.03672984 | -12.1046828 | 1.4135234028 | 1.3758294454 | 65.32093767 | ns           |
| CDHR5    | -0.11335736 | -0.06542682 | -11.951658  | 8.9038819606 | 8.3868823629 | 63.50441306 | ns           |
| CTSO     | -0.08487085 | -0.0237383  | -11.9151032 | 1.3693572509 | 1.2495384915 | 63.07749961 | ns           |
| NPC2     | -0.07765948 | -0.03478036 | -11.8100802 | 4.7791063046 | 4.2287849726 | 61.84549383 | ns           |
| CD83     | -0.08955644 | -0.0265991  | -11.7767707 | 7.0537687412 | 6.0579425660 | 61.45979486 | ns           |
| LGALS9   | -0.08949725 | -0.04005442 | -11.7556257 | 9.0468748955 | 7.5476784842 | 61.21458839 | ns           |
| BGLAP    | -0.21843526 | -0.05549405 | -11.7513301 | 9.4828765980 | 7.6916665739 | 61.16658518 | down         |
| VWC2     | -0.10487118 | -0.04137541 | -11.7154429 | 1.4518435325 | 1.1457792202 | 60.74834378 | ns           |
| INHBB    | -0.12646698 | -0.02699148 | -11.5703877 | 7.8469004537 | 6.0297235065 | 59.08331531 | ns           |
| RNASE6   | -0.06912997 | -0.02731617 | -11.470919  | 2.4549048807 | 1.8380313465 | 57.95523765 | ns           |
| A1BG     | -0.04334657 | -0.02054699 | -11.4657728 | 2.5972545232 | 1.8959958019 | 57.89802743 | ns           |
| CFB      | -0.08786291 | -0.0487602  | -11.4277855 | 4.0334215296 | 2.8725831382 | 57.46638581 | ns           |
| F9       | -0.05034282 | -0.02595323 | -11.3567013 | 9.0338466504 | 6.2806743379 | 56.66925802 | ns           |
| TNFRSF4  | -0.09352427 | -0.01322573 | -11.3349836 | 1.1519752234 | 7.8227154710 | 56.42747762 | ns           |

|          |             |             |             |              |              |             |      |
|----------|-------------|-------------|-------------|--------------|--------------|-------------|------|
| AMBP     | -0.05153812 | -0.03425718 | -11.2967357 | 1.7756716493 | 1.1784002763 | 56.00013711 | ns   |
| IGFBP4   | -0.10211431 | -0.04467782 | -11.2923151 | 1.8757648303 | 1.2171629565 | 55.94924772 | ns   |
| GHR      | -0.07568189 | -0.02835094 | -11.1684349 | 7.5440575138 | 4.7888365088 | 54.57704047 | ns   |
| FAM20A   | -0.06987016 | -0.04298675 | -11.1581473 | 8.4137745209 | 5.2272811917 | 54.4651605  | ns   |
| RTN4R    | -0.09240942 | -0.03712188 | -11.0992295 | 1.6199963839 | 9.8549780023 | 53.8181079  | ns   |
| HAVCR2   | -0.08694432 | -0.03890064 | -11.0388983 | 3.1666955704 | 1.8870920542 | 53.15865057 | ns   |
| FCAMR    | -0.17759352 | -0.02923245 | -11.006787  | 4.5035626072 | 2.6300805626 | 52.80985788 | ns   |
| TGFA     | -0.11648496 | 0.008263632 | -11.0018498 | 4.7657214630 | 2.7286091513 | 52.75550181 | ns   |
| CLMP     | -0.05529708 | -0.01790542 | -10.9552418 | 7.9297026726 | 4.4528330392 | 52.25110394 | ns   |
| SHISA5   | -0.05573694 | -0.02141815 | -10.9504994 | 8.3573413303 | 4.6044220159 | 52.20004912 | ns   |
| MPO      | -0.11940903 | -0.00808592 | -10.9442587 | 8.9640328904 | 4.8472177852 | 52.13211395 | ns   |
| FURIN    | -0.09319228 | -0.04240017 | -10.9128429 | 1.2625273373 | 6.7028724094 | 51.79371359 | ns   |
| ORM1     | -0.0482866  | -0.00760453 | -10.8948973 | 1.5355250521 | 8.0066663433 | 51.60044925 | ns   |
| CD302    | -0.07153369 | -0.0288168  | -10.8782666 | 1.8443470054 | 9.4482337825 | 51.42146783 | ns   |
| CCL22    | -0.1295632  | -0.04447282 | -10.7441113 | 7.8870354693 | 3.9707144086 | 49.99000333 | ns   |
| EFNA4    | -0.06835558 | -0.02651292 | -10.7182321 | 1.0406416069 | 5.1061680350 | 49.71562403 | ns   |
| SSC4D    | -0.30645676 | 0.095505149 | -10.7174103 | 1.0492126099 | 5.1061680350 | 49.70698181 | down |
| CLEC4D   | -0.15413014 | -0.05301058 | -10.7057876 | 1.1874671262 | 5.6842688668 | 49.58386113 | ns   |
| CFD      | -0.04431208 | -0.01534626 | -10.6293891 | 2.6798753986 | 1.2621348651 | 48.77959425 | ns   |
| TNFRSF1B | -0.08452213 | -0.01985275 | -10.6162019 | 3.0886481784 | 1.4315639176 | 48.6411336  | ns   |
| CD300E   | -0.09856563 | -0.02326622 | -10.6060252 | 3.4369434484 | 1.5681054483 | 48.53422028 | ns   |
| LAIR1    | -0.08980622 | -0.03529584 | -10.5647098 | 5.3358680473 | 2.3970361074 | 48.10315943 | ns   |
| RNASE4   | -0.0610931  | -0.03006874 | -10.5568652 | 5.8277482467 | 2.5783371031 | 48.02056309 | ns   |
| GUSB     | -0.15064713 | -0.04504515 | -10.5219647 | 8.3704834651 | 3.6480315997 | 47.6578673  | ns   |
| PALM2    | -0.0868967  | -0.01341872 | -10.3960763 | 3.1272234291 | 1.3428665313 | 46.35739669 | ns   |
| ADAMTS15 | -0.1115731  | -0.04762613 | -10.3786914 | 3.7569501030 | 1.5898977247 | 46.17937949 | ns   |
| SERPIND1 | -0.06525046 | -0.03243131 | -10.3639628 | 4.3697718328 | 1.8228191074 | 46.02832752 | ns   |
| LAMP3    | -0.12723803 | -0.04649444 | -10.3507882 | 5.0071216071 | 2.0454302627 | 45.89327968 | ns   |
| TNFRSF14 | -0.06902967 | -0.0197507  | -10.3502681 | 5.0435266752 | 2.0454302627 | 45.88845458 | ns   |
| PON3     | 0.068166087 | 0.001823046 | 10.32476615 | 6.5640063982 | 2.6256025593 | 45.62786202 | ns   |
| SLC39A5  | -0.12993665 | -0.06035542 | -10.3193868 | 6.9456370521 | 2.7407108367 | 45.57268446 | ns   |
| RNASE1   | -0.05277052 | -0.01455021 | -10.3131898 | 7.3932362040 | 2.8678115529 | 45.50984896 | ns   |
| IL6      | -0.17973687 | -0.00484653 | -10.3124772 | 7.4641670556 | 2.8678115529 | 45.50281656 | ns   |
| KRT18    | -0.19581227 | -0.00335384 | -10.3051296 | 8.0528923886 | 3.0538241266 | 45.42800343 | ns   |
| NECTIN2  | -0.06522556 | -0.01902468 | -10.2875306 | 9.6583686332 | 3.6156969755 | 45.24895391 | ns   |
| LILRA5   | -0.07970597 | -0.05301764 | -10.2581412 | 1.3071790958 | 4.8315986835 | 44.95074387 | ns   |
| IL10RB   | -0.06664475 | -0.02621208 | -10.2517511 | 1.3937679326 | 5.0872529541 | 44.885817   | ns   |
| YAP1     | -0.05868733 | -0.01888789 | -10.2375549 | 1.6109558255 | 5.7686875263 | 44.74183566 | ns   |
| PALM     | -0.06556491 | -0.01213568 | -10.2371618 | 1.6199738943 | 5.7686875263 | 44.73828095 | ns   |
| CPM      | -0.08779222 | -0.0439586  | -10.218207  | 1.9662341766 | 6.9173539707 | 44.54604249 | ns   |
| HSPG2    | -0.05799902 | -0.01699601 | -10.1920086 | 2.5790112269 | 8.9651342652 | 44.28309767 | ns   |
| TAFA5    | -0.07931372 | -0.0233528  | -10.1656885 | 3.3677910870 | 1.1569352910 | 44.01818811 | ns   |
| MZB1     | -0.1195919  | -0.05932045 | -10.1427922 | 4.2476274542 | 1.4422176937 | 43.78829474 | ns   |
| AGRN     | -0.07652832 | -0.02782697 | -10.1313246 | 4.7714410564 | 1.6014491821 | 43.67328283 | ns   |
| OCLN     | -0.09234605 | -0.03554469 | -10.0902552 | 7.2277913550 | 2.3983125859 | 43.26240021 | ns   |
| SMOC1    | -0.07670289 | -0.05614878 | -10.0792934 | 8.0756483185 | 2.6495385494 | 43.15278302 | ns   |
| COL15A1  | -0.05669043 | -0.01423475 | -10.0578818 | 1.0029292009 | 3.2539480740 | 42.94032811 | ns   |
| APOF     | 0.054688892 | -0.01808688 | 9.992845441 | 1.9291837070 | 6.1903477194 | 42.29629215 | ns   |
| RETN     | -0.09513671 | -0.01707067 | -9.98998726 | 1.9901801224 | 6.3166586495 | 42.26917125 | ns   |
| VSIG4    | -0.09147405 | -0.04366268 | -9.98793188 | 2.0289399968 | 6.3704352587 | 42.24785769 | ns   |
| OSM      | -0.1704173  | -0.07276487 | -9.97691777 | 2.2677008074 | 7.0443471890 | 42.13944234 | ns   |
| WFDC2    | -0.07983945 | -0.01115656 | -9.95825126 | 2.7495344960 | 8.4512007667 | 41.95860797 | ns   |
| PLTP     | 0.084824089 | 0.006951874 | 9.939473719 | 3.2909143827 | 1.0009864580 | 41.77063887 | ns   |
| PRAP1    | -0.09583367 | -0.09612293 | -9.92560624 | 3.7773453438 | 1.1370977736 | 41.63418636 | ns   |
| CD300A   | -0.06327686 | -0.01863664 | -9.91216416 | 4.3333872115 | 1.2911725160 | 41.50478653 | ns   |
| LTBP3    | -0.12656933 | 0.009939478 | -9.90121426 | 4.8370444158 | 1.4156071245 | 41.39718175 | ns   |
| RNASET2  | -0.05870519 | -0.01705792 | -9.90056907 | 4.8479696047 | 1.4156071245 | 41.38936457 | ns   |
| PTGDS    | -0.06372015 | -0.01244456 | -9.89240409 | 5.2737766481 | 1.5246958230 | 41.3107138  | ns   |
| CD5      | -0.07739943 | -0.01939922 | -9.86317585 | 7.0204592088 | 2.0097785186 | 41.02305931 | ns   |
| LGALS1   | -0.07732508 | -0.03511353 | -9.85217678 | 7.8427873995 | 2.2233921559 | 40.91759873 | ns   |
| ADAM8    | -0.06447348 | -0.02241135 | -9.79912832 | 1.3211266035 | 3.7093170023 | 40.40102973 | ns   |
| NOMO1    | -0.055773   | -0.02945913 | -9.79491693 | 1.3785794898 | 3.8337639147 | 40.36100042 | ns   |
| MFAP5    | -0.09433964 | -0.03717505 | -9.78365824 | 1.5377557226 | 4.2360818020 | 40.251394   | ns   |
| PI3      | -0.1209402  | -0.03348576 | -9.77826297 | 1.6280437547 | 4.4428857607 | 40.20205786 | ns   |
| CTSZ     | -0.07182271 | -0.02756025 | -9.7552628  | 2.0359522395 | 5.5046116107 | 39.97857112 | ns   |
| LRIG1    | -0.07767983 | -0.02725682 | -9.70481815 | 3.3269818570 | 8.9126486446 | 39.49166586 | ns   |

|           |             |             |             |              |              |             |    |
|-----------|-------------|-------------|-------------|--------------|--------------|-------------|----|
| PLAUR     | -0.05986705 | -0.03703801 | -9.68465882 | 4.0594989470 | 1.0776124477 | 39.30109618 | ns |
| IFI30     | -0.08198411 | -0.04655162 | -9.68011052 | 4.2468053239 | 1.1171776167 | 39.25714172 | ns |
| C3        | -0.10139721 | -0.00887647 | -9.66061857 | 5.1554883688 | 1.3441094675 | 39.07503985 | ns |
| NBL1      | -0.05459654 | -0.01560759 | -9.62461473 | 7.2502117066 | 1.8735060339 | 38.7262046  | ns |
| LMNB2     | -0.05672293 | -0.02366368 | -9.6149429  | 7.9559227865 | 2.0378328540 | 38.63366696 | ns |
| DDC       | 0.106409511 | 0.041972203 | 9.603204797 | 8.9280226829 | 2.2669414116 | 38.52368895 | ns |
| PRCP      | -0.07103082 | -0.04334977 | -9.57421677 | 1.1787440424 | 2.9671832793 | 38.24797265 | ns |
| NPPC      | -0.0991335  | -0.00057409 | -9.55747406 | 1.3857143384 | 3.4583639899 | 38.0896809  | ns |
| LCN2      | -0.08145324 | -0.01664785 | -9.52041665 | 1.9874014715 | 4.9179765228 | 37.74504474 | ns |
| CD74      | -0.07528479 | -0.03293008 | -9.51678813 | 2.0435399798 | 5.0144006229 | 37.70480104 | ns |
| COL18A1   | -0.05027551 | -0.03496446 | -9.50659051 | 2.2557706187 | 5.4890418390 | 37.61085707 | ns |
| EFNA1     | -0.05699701 | -0.01533742 | -9.46893911 | 3.2306972397 | 7.7963933390 | 37.25716364 | ns |
| CD59      | -0.04688004 | -0.02144653 | -9.45537683 | 3.6956398762 | 8.8453019988 | 37.13519157 | ns |
| F7        | -0.06724937 | -0.03198176 | -9.45036672 | 3.8550699729 | 9.1518734317 | 37.08409849 | ns |
| FGFR2     | -0.04533057 | -0.02253775 | -9.44782857 | 3.9451472786 | 9.2901855271 | 37.05923739 | ns |
| CD300C    | -0.07337033 | -0.02114561 | -9.44235079 | 4.1532593462 | 9.7020138327 | 37.0069881  | ns |
| ITGA5     | -0.05523018 | -0.02706417 | -9.41942187 | 5.1676710550 | 1.1975872603 | 36.79447981 | ns |
| CD72      | -0.08557073 | -0.01876961 | -9.37637562 | 7.7756580299 | 1.7877890903 | 36.39733531 | ns |
| IGFBP6    | -0.05943002 | -0.01031694 | -9.36853582 | 8.3677979369 | 1.9089039043 | 36.32363812 | ns |
| CLEC6A    | -0.10094489 | -0.02380811 | -9.32077718 | 1.3123867207 | 2.9706738175 | 35.88328962 | ns |
| PGF       | -0.0519586  | -0.02196675 | -9.31668342 | 1.3582453194 | 3.0508279483 | 35.84138247 | ns |
| BSG       | -0.03995363 | -0.0147872  | -9.29516603 | 1.6615656216 | 3.7036424544 | 35.64348214 | ns |
| SIT1      | -0.12161993 | -0.022559   | -9.25639124 | 2.3933786435 | 5.2944436660 | 35.29175778 | ns |
| RNF149    | -0.05846551 | -0.02630013 | -9.23968697 | 2.7963128602 | 6.1392733473 | 35.1391808  | ns |
| LILRB4    | -0.0929308  | -0.03482651 | -9.23024937 | 3.0518085642 | 6.6502097072 | 35.05280151 | ns |
| GDF15     | -0.0813677  | -0.05624946 | -9.15479555 | 6.1127758699 | 1.3221707807 | 34.36254291 | ns |
| CD27      | -0.08080719 | -0.03557877 | -9.13382954 | 7.4175996904 | 1.5926022864 | 34.1737796  | ns |
| IGFBP1    | 0.283405602 | 0.008823951 | 9.123497593 | 8.1532152828 | 1.7377655931 | 34.07990212 | up |
| GPD1      | -0.1099884  | 0.002666076 | -9.11490444 | 8.8244092862 | 1.8671938489 | 34.00237655 | ns |
| NPDC1     | -0.05961192 | -0.01434314 | -9.06944178 | 1.3390804341 | 2.8130322788 | 33.59540619 | ns |
| TNFRSF19  | -0.05950836 | -0.0182122  | -9.04225886 | 1.7129817574 | 3.5727905226 | 33.3488389  | ns |
| CHCHD10   | -0.07602349 | -0.04371587 | -9.01222196 | 2.2509268658 | 4.6614939350 | 33.08138275 | ns |
| CKAP4     | -0.05223284 | -0.00595406 | -8.99497507 | 2.6328549113 | 5.4140396769 | 32.92840023 | ns |
| CALB2     | -0.06351779 | -0.00223921 | -8.95696001 | 3.7220694603 | 7.6003096672 | 32.5946737  | ns |
| CRHBP     | -0.05865314 | -0.04154438 | -8.90888261 | 5.7255479566 | 1.1610138912 | 32.16763158 | ns |
| PAG1      | -0.11513804 | -0.01126442 | -8.89378515 | 6.5670264627 | 1.3224632600 | 32.03694616 | ns |
| PRSS8     | -0.08498993 | -0.05488094 | -8.88723363 | 6.9542427930 | 1.3903174363 | 31.97722381 | ns |
| C1RL      | -0.03862548 | -0.02239994 | -8.88636635 | 6.9992007923 | 1.3903174363 | 31.96706123 | ns |
| PZP       | -0.10584383 | 0.208852998 | -8.88336659 | 7.1880204322 | 1.4181770042 | 31.94039868 | ns |
| ADIPOQ    | 0.132693378 | 0.057234325 | 8.871437344 | 7.9971521133 | 1.5672271255 | 31.8355985  | ns |
| TREM2     | -0.10505248 | -0.06070506 | -8.85584068 | 9.2023706082 | 1.7913948117 | 31.70145206 | ns |
| IGSF9     | -0.16987604 | -0.0458287  | -8.85348403 | 9.3876935022 | 1.8153685448 | 31.67812285 | ns |
| EFEMP1    | -0.06239785 | -0.03396737 | -8.82254941 | 1.2377818353 | 2.3778440520 | 31.4100059  | ns |
| TNFRSF10B | -0.07867418 | -0.03318523 | -8.79055572 | 1.6446385735 | 3.1387873429 | 31.13168757 | ns |
| SCARB2    | -0.05723622 | -0.02528381 | -8.78828839 | 1.6808887661 | 3.1871397384 | 31.11483826 | ns |
| OGN       | -0.08082507 | -0.04045438 | -8.78144879 | 1.7815766869 | 3.3562605973 | 31.05099429 | ns |
| CD79B     | -0.08797343 | -0.02614915 | -8.76697425 | 2.0227173137 | 3.7861118950 | 30.92350611 | ns |
| PGLYRP1   | -0.08598551 | -0.00844634 | -8.75610987 | 2.2279293172 | 4.1436647173 | 30.83093237 | ns |
| B2M       | -0.05606992 | -0.0022426  | -8.74239759 | 2.5130720015 | 4.6444115472 | 30.71087606 | ns |
| SERPINA7  | -0.03535088 | -0.01020756 | -8.73414247 | 2.7025734702 | 4.9632166874 | 30.63947894 | ns |
| DLL1      | -0.05613193 | -0.01921755 | -8.72777465 | 2.8593541057 | 5.2183212430 | 30.58545876 | ns |
| QPCT      | -0.05408162 | -0.03056179 | -8.7067337  | 3.4418926707 | 6.2424388810 | 30.4052503  | ns |
| LTBR      | -0.05301651 | -0.00391684 | -8.6979799  | 3.7190785532 | 6.6823853810 | 30.33151924 | ns |
| SIRPB1    | -0.09053181 | -0.03952379 | -8.69759253 | 3.7302356750 | 6.6823853810 | 30.32724432 | ns |
| FCER2     | -0.10167653 | -0.0254095  | -8.68720862 | 4.0838009966 | 7.2711578721 | 30.23635768 | ns |
| SNCG      | -0.13872734 | -0.09860755 | -8.6726946  | 4.6395867520 | 8.2106626156 | 30.11325111 | ns |
| CREG1     | -0.07706189 | -0.00221972 | -8.66341721 | 5.0348086329 | 8.8564103664 | 30.03515229 | ns |
| NOS3      | -0.10500836 | -0.03188146 | -8.63474699 | 6.4682717299 | 1.1309792485 | 29.7905378  | ns |
| DPT       | -0.05577136 | -0.06173397 | -8.61993401 | 7.3380547474 | 1.2754238013 | 29.65846613 | ns |
| PIK3IP1   | -0.04918642 | -0.01434001 | -8.60771138 | 8.1667132669 | 1.4110534165 | 29.55593048 | ns |
| FETUB     | -0.06859216 | -0.03306284 | -8.59290407 | 9.2879319635 | 1.5953389019 | 29.43073645 | ns |
| LDLR      | -0.11185646 | -0.04661866 | -8.58841407 | 9.6513611983 | 1.6480686958 | 29.39128482 | ns |
| CCL16     | -0.10489407 | -0.12633205 | -8.57876236 | 1.0486479712 | 1.7802628349 | 29.30798319 | ns |
| TREML2    | -0.0665001  | -0.00246043 | -8.55241754 | 1.3177082209 | 2.2241086735 | 29.08631628 | ns |
| THY1      | -0.05417852 | -0.01898924 | -8.5483825  | 1.3632894330 | 2.2878190485 | 29.05005805 | ns |
| CRIP2     | -0.07424235 | -0.04293681 | -8.52673003 | 1.6449404639 | 2.7447006598 | 28.87084175 | ns |

|             |             |              |             |              |              |             |      |
|-------------|-------------|--------------|-------------|--------------|--------------|-------------|------|
| CCL18       | -0.14298978 | -0.03386284  | -8.46870277 | 2.7076824377 | 4.4922913172 | 28.38548089 | ns   |
| BTN2A1      | -0.04754739 | -0.01175012  | -8.44918027 | 3.1928253345 | 5.2672598739 | 28.21727583 | ns   |
| CRELD1      | -0.06956573 | -0.04364029  | -8.42834705 | 3.8182323216 | 6.2636170669 | 28.04787778 | ns   |
| ACVRL1      | -0.04526047 | -0.02774798  | -8.42712447 | 3.8560675072 | 6.2903447604 | 28.03543669 | ns   |
| NT5C1A      | -0.05852247 | -0.01621346  | -8.42314365 | 3.9831761132 | 6.4615968059 | 27.99845469 | ns   |
| ADH4        | -0.17434832 | -0.03484316  | -8.39958926 | 4.8762707008 | 7.8666908544 | 27.80831496 | ns   |
| GSTA1       | -0.17558046 | -0.00775496  | -8.37538306 | 5.9771439506 | 9.5897034812 | 27.60422034 | ns   |
| POLR2F      | -0.06718233 | -0.00156641  | -8.3461413  | 7.6503846338 | 1.2207171109 | 27.36231165 | ns   |
| ITIH4       | -0.04671522 | 0.006965556  | -8.33192255 | 8.6142934010 | 1.3670509092 | 27.24168494 | ns   |
| RBFOX3      | -0.0660611  | -0.03056084  | -8.29757635 | 1.1491285342 | 1.8137596324 | 26.95848404 | ns   |
| EFCAB14     | -0.04673215 | -0.00638845  | -8.29645853 | 1.1602909616 | 1.8215320473 | 26.95028356 | ns   |
| PLAT        | -0.10379862 | -0.09331766  | -8.27896075 | 1.3433559952 | 2.0976467947 | 26.80708477 | ns   |
| CANT1       | -0.03837827 | -0.01148163  | -8.26736889 | 1.4809864769 | 2.3002555918 | 26.7142957  | ns   |
| HJV         | -0.08101479 | -0.01201012  | -8.23360801 | 1.9599458799 | 3.0280645341 | 26.43487889 | ns   |
| TNFRSF11A   | -0.07015117 | -0.0354379   | -8.19261383 | 2.7536808260 | 4.2319726379 | 26.10143694 | ns   |
| OXT         | -0.28082565 | 0.000105097  | -8.17271304 | 3.2464219276 | 4.9631162453 | 25.9400717  | down |
| RBP5        | -0.11066751 | -0.0139115   | -8.14709777 | 4.0136841128 | 6.1041445883 | 25.7370114  | ns   |
| LRP11       | -0.06517773 | -0.02729547  | -8.1197228  | 5.0259358776 | 7.6040066127 | 25.51636679 | ns   |
| NUCB2       | -0.07102105 | -0.00627497  | -8.09572825 | 6.1125508873 | 9.2003343252 | 25.31985684 | ns   |
| DSC2        | -0.06057744 | -0.01553323  | -8.08220303 | 6.8369249494 | 1.0237856847 | 25.21727624 | ns   |
| PRTN3       | -0.08794231 | -0.00236403  | -8.0648758  | 7.8872674787 | 1.1750418896 | 25.08469346 | ns   |
| CEACAM8     | -0.09138098 | -0.03628282  | -8.06010377 | 8.1918050346 | 1.2142167868 | 25.04221566 | ns   |
| XG          | -0.05736989 | -0.006128    | -8.04233122 | 9.4511855861 | 1.3938112076 | 24.89528009 | ns   |
| CA5A        | -0.17331594 | -0.01591403  | -8.0357761  | 9.9842302561 | 1.4650227310 | 24.84833865 | ns   |
| ANG         | -0.06429903 | -0.02723474  | -8.02298341 | 1.1068212897 | 1.6159590829 | 24.74441653 | ns   |
| IFNLR1      | -0.0711839  | -0.01527757  | -8.01327355 | 1.1968175275 | 1.7386602888 | 24.66465677 | ns   |
| DPY30       | -0.11266696 | -0.00910265  | -8.00576711 | 1.2711264297 | 1.8374698884 | 24.60308888 | ns   |
| C19orf12    | -0.11683852 | 0.073978553  | -7.9990118  | 1.3449375172 | 1.9345899262 | 24.55635491 | ns   |
| CCDC80      | -0.0634406  | -0.03987433  | -7.99562584 | 1.3807557256 | 1.9763758425 | 24.52605758 | ns   |
| IL12B       | -0.10063679 | -0.02336091  | -7.97385074 | 1.6445027497 | 2.3424136728 | 24.34994342 | ns   |
| IGSF8       | -0.05454819 | -0.02036144  | -7.96570918 | 1.7577250279 | 2.4915325639 | 24.28958134 | ns   |
| RIDA        | -0.08833619 | 0.006284974  | -7.96159934 | 1.8181833111 | 2.5647803229 | 24.26072127 | ns   |
| VEGFB       | -0.05044443 | -0.0276868   | -7.94591753 | 2.0635910110 | 2.8969643040 | 24.13837156 | ns   |
| MMP9        | -0.1146491  | -0.07186344  | -7.93782095 | 2.1993620939 | 3.0727929734 | 24.06906397 | ns   |
| LECT2       | -0.11293998 | -0.06099332  | -7.93631564 | 2.2245799908 | 3.0932255111 | 24.05461936 | ns   |
| ATRAID      | -0.04476529 | -0.00162156  | -7.89653442 | 3.0592939877 | 4.2337149024 | 23.74328022 | ns   |
| ITGAV       | 0.029720789 | -0.00060153  | 7.894642871 | 3.1051245738 | 4.2768696961 | 23.7268583  | ns   |
| FGA         | -0.05374514 | -0.01775554  | -7.86446945 | 3.9562526577 | 5.4235951928 | 23.49891966 | ns   |
| IL12A_IL12B | -0.13993815 | -0.00296878  | -7.85367689 | 4.3071752842 | 5.8770802943 | 23.41200061 | ns   |
| SPON2       | -0.06012667 | -0.02850134  | -7.82110845 | 5.5779855115 | 7.5756826483 | 23.16032838 | ns   |
| CAPG        | -0.10863356 | -0.06983188  | -7.81627046 | 5.7946778053 | 7.8335459220 | 23.12170445 | ns   |
| CCN5        | -0.0721884  | -0.03328942  | -7.78411377 | 7.4657883027 | 1.0046129882 | 22.87150896 | ns   |
| IL16        | -0.07536397 | -0.03643258  | -7.73998315 | 1.0552853630 | 1.4135014955 | 22.52951929 | ns   |
| HNMT        | -0.08627667 | -0.05734174  | -7.73899835 | 1.0649188533 | 1.4198918044 | 22.52821479 | ns   |
| EZR         | -0.04484388 | -0.02376248  | -7.71581961 | 1.2749945794 | 1.6922655327 | 22.3444301  | ns   |
| EPHA2       | -0.05051954 | -0.02213227  | -7.70974385 | 1.3400957124 | 1.7706241993 | 22.31019254 | ns   |
| BST2        | -0.09040805 | 0.015131446  | -7.69332775 | 1.5195109102 | 1.9986359720 | 22.17272296 | ns   |
| HLA-E       | -0.04909353 | -0.00444427  | -7.69147839 | 1.5425065832 | 2.0197844049 | 22.16150295 | ns   |
| TNFRSF9     | -0.06936137 | -0.0101551   | -7.68471784 | 1.6263150533 | 2.1200178373 | 22.1119801  | ns   |
| SIGLEC8     | -0.07523064 | -0.03199942  | -7.67812148 | 1.7132030242 | 2.2233568136 | 22.06536217 | ns   |
| CD38        | -0.0541055  | -0.02282377  | -7.6741505  | 1.7653985846 | 2.2809574633 | 22.0311767  | ns   |
| CCL7        | -0.10756645 | -0.02767532  | -7.66592378 | 1.8815477485 | 2.4203169276 | 21.96708287 | ns   |
| MAD1L1      | -0.08759068 | 9.3353285535 | -7.65633723 | 2.0279138683 | 2.5971528489 | 21.89739706 | ns   |
| ICAM1       | -0.05098583 | -0.02943166  | -7.64856539 | 2.1538222650 | 2.7463585213 | 21.83878833 | ns   |
| SHBG        | 0.089756579 | 0.033412638  | 7.633371644 | 2.4200048782 | 3.0723540193 | 21.71879246 | ns   |
| SUOX        | -0.10379312 | 0.065689172  | -7.61988077 | 2.6853780560 | 3.3945038630 | 21.61555387 | ns   |
| EGLN1       | -0.09441325 | 0.007027714  | -7.5813022  | 3.6164324533 | 4.5517167085 | 21.3278634  | ns   |
| UPB1        | -0.15441317 | -0.00720081  | -7.55305796 | 4.4884763622 | 5.6250433380 | 21.11369282 | ns   |
| CFP         | -0.03786676 | -0.0121674   | -7.54797573 | 4.6663350193 | 5.8229479728 | 21.07565874 | ns   |
| PSAP        | -0.04504756 | -0.01470993  | -7.53391434 | 5.1987085809 | 6.4596719388 | 20.97351592 | ns   |
| CXCL17      | -0.07752008 | -0.04873897  | -7.51889    | 5.8257119021 | 7.2080842179 | 20.85797908 | ns   |
| SELE        | -0.09261259 | -0.10645912  | -7.51544671 | 5.9809785046 | 7.3689692968 | 20.8326906  | ns   |
| ARSA        | -0.07858594 | 0.019352267  | -7.5057892  | 6.4403402012 | 7.9015938604 | 20.76322601 | ns   |
| TNFRSF10A   | -0.0571957  | -0.04336158  | -7.48884748 | 7.3276521198 | 8.9526126317 | 20.63957806 | ns   |
| CSF3R       | -0.04580314 | -0.0081714   | -7.48586572 | 7.5015576123 | 9.1268950949 | 20.62219483 | ns   |
| GHRL        | 0.141618565 | 0.053246639  | 7.475207451 | 8.1251413898 | 9.8445696508 | 20.53783759 | up   |



|             |             |             |             |              |              |             |    |
|-------------|-------------|-------------|-------------|--------------|--------------|-------------|----|
| FN1         | -0.04366008 | -0.0144894  | -7.47044961 | 8.4180020200 | 1.0157258635 | 20.49871354 | ns |
| SERPINB8    | -0.09811904 | -0.01466746 | -7.44632531 | 1.0101137963 | 1.2114062169 | 20.31984581 | ns |
| CCN3        | -0.05463521 | -0.02570954 | -7.44606585 | 1.0122709483 | 1.2114062169 | 20.31917754 | ns |
| GM2A        | -0.05978521 | -0.00674073 | -7.44560516 | 1.0171027321 | 1.2122203991 | 20.32282317 | ns |
| PRG2        | -0.08154508 | 0.009338928 | -7.43878303 | 1.0694390738 | 1.2688522262 | 20.26506292 | ns |
| SCRG1       | -0.04140666 | -0.02391007 | -7.43830177 | 1.0733099311 | 1.2688522262 | 20.26121294 | ns |
| ISM1        | -0.06769637 | -0.03915717 | -7.41934899 | 1.2385912840 | 1.4538546932 | 20.12412985 | ns |
| CCER2       | -0.09647664 | 0.035620043 | -7.41934304 | 1.2397596528 | 1.4538546932 | 20.12997685 | ns |
| CCL20       | -0.14817711 | 0.014891783 | -7.41788315 | 1.2515526550 | 1.4618135011 | 20.11033476 | ns |
| PCBD1       | -0.07638021 | 0.020059573 | -7.4004254  | 1.4289252241 | 1.6623353204 | 19.99147286 | ns |
| SERPINA3    | -0.02308996 | -0.00450974 | -7.39529574 | 1.4834584907 | 1.7189280924 | 19.94636291 | ns |
| TIMD4       | -0.07578178 | -0.02280482 | -7.39289616 | 1.5107450799 | 1.7436267325 | 19.9306485  | ns |
| CALCA       | -0.10459997 | 0.02962224  | -7.39172871 | 1.5246165624 | 1.7527088041 | 19.92422279 | ns |
| GOLM2       | -0.03878645 | -0.02292632 | -7.35262218 | 2.0406194003 | 2.3367092740 | 19.63256953 | ns |
| GPR37       | -0.10963655 | -0.09750955 | -7.33336027 | 2.3587613494 | 2.6904621641 | 19.501263   | ns |
| CCL21       | -0.06824597 | -0.03138217 | -7.22828719 | 5.1207200865 | 5.8180944174 | 18.73657713 | ns |
| FTCD        | -0.13670104 | 0.059164144 | -7.22476467 | 5.2539949019 | 5.9463818269 | 18.71032941 | ns |
| CNTN4       | 0.040064772 | 0.008460208 | 7.206979012 | 5.9867313428 | 6.7495195062 | 18.58458902 | ns |
| CDHR2       | -0.13278855 | -0.17423928 | -7.2056393  | 6.0469652105 | 6.7912070825 | 18.57691816 | ns |
| FABP5       | -0.11747493 | -0.02514401 | -7.18415195 | 7.0713874610 | 7.9112840560 | 18.42004502 | ns |
| IGFBP2      | 0.114713913 | -0.02548447 | 7.181781155 | 7.1940732211 | 8.0178220632 | 18.40300673 | ns |
| CSTB        | -0.07275517 | -0.05140729 | -7.18126193 | 7.2286276478 | 8.0257006584 | 18.40670696 | ns |
| IDUA        | -0.0766398  | -0.06730344 | -7.18041453 | 7.2653461135 | 8.0359131255 | 18.39162952 | ns |
| ST3GAL1     | 0.073311603 | 0.060155425 | 7.169002475 | 7.9002206565 | 8.7051487989 | 18.31590672 | ns |
| SCLY        | -0.0807635  | -0.00612037 | -7.15846564 | 8.5251110948 | 9.3583926304 | 18.2365124  | ns |
| PILRA       | -0.06855234 | -0.07638171 | -7.14298767 | 9.5421770003 | 1.0435639266 | 18.1294517  | ns |
| MET         | 0.033221085 | 0.019595455 | 7.133236511 | 1.0238991262 | 1.1155915853 | 18.05933804 | ns |
| CTSD        | -0.06501754 | 0.007988467 | -7.13259265 | 1.0326028228 | 1.1208922834 | 18.07957148 | ns |
| CD22        | -0.06876941 | -0.00931444 | -7.10314559 | 1.2724248005 | 1.3761038584 | 17.84507215 | ns |
| SKAP1       | -0.12405003 | -0.01034146 | -7.08577536 | 1.4432997220 | 1.5551421359 | 17.72911188 | ns |
| PIGR        | -0.05896549 | -0.01968801 | -7.08275014 | 1.4754748225 | 1.5839656183 | 17.7093565  | ns |
| LGALS3BP    | -0.04701701 | 0.011790123 | -7.08147461 | 1.4875985954 | 1.5911310984 | 17.69327954 | ns |
| APBB1IP     | -0.07783902 | 0.008427928 | -7.0781393  | 1.5245356622 | 1.6246876400 | 17.67427433 | ns |
| FAM3C       | -0.04618024 | -0.02927723 | -7.07585737 | 1.5498139392 | 1.6456206191 | 17.65838737 | ns |
| MXRA8       | 0.04835557  | 0.034231663 | 7.073876136 | 1.5726531110 | 1.6592055466 | 17.64846342 | ns |
| GRN         | -0.03936114 | -0.01926381 | -7.07370917 | 1.5739723850 | 1.6592055466 | 17.6433882  | ns |
| DDT         | -0.06533317 | 0.017563997 | -7.05977943 | 1.7385375178 | 1.8260897669 | 17.54152263 | ns |
| CLECT7A     | -0.09636178 | -0.12431534 | -7.05166934 | 1.8423770332 | 1.9282225580 | 17.48386367 | ns |
| TNF         | -0.06183566 | -0.00662835 | -7.0365411  | 2.0556827387 | 2.1405466337 | 17.38759981 | ns |
| SMOC2       | -0.06172543 | -0.02954394 | -7.03612043 | 2.0599096030 | 2.1405466337 | 17.37786474 | ns |
| BAIAP2      | -0.10406181 | -0.01061989 | -7.0222357  | 2.2769971484 | 2.3577417281 | 17.28842909 | ns |
| ERBB4       | 0.0384905   | 0.011304172 | 7.021270338 | 2.2902889570 | 2.3631250015 | 17.27391943 | ns |
| MCAM        | 0.054278134 | 0.016806363 | 7.01944982  | 2.3207485085 | 2.3861217059 | 17.26310341 | ns |
| DEFA1_DEFA1 | -0.08302854 | 0.009762663 | -7.01873375 | 2.3354257999 | 2.3875087572 | 17.26815292 | ns |
| PTS         | -0.09104045 | 0.018822638 | -7.01852196 | 2.3384503581 | 2.3875087572 | 17.2632266  | ns |
| TNFRSF8     | -0.07177018 | 0.016251564 | -6.98776725 | 2.9066887983 | 2.9573279759 | 17.03906144 | ns |
| CA14        | 0.058881505 | 0.057241502 | 6.974038143 | 3.2040312898 | 3.2485317244 | 16.94351819 | ns |
| GLA         | -0.05853412 | -0.02396195 | -6.95891617 | 3.5699990529 | 3.6070578666 | 16.84960387 | ns |
| IL18BP      | -0.04724581 | -0.01793789 | -6.95402591 | 3.6933195726 | 3.7187907421 | 16.80991474 | ns |
| SPINK2      | -0.05451195 | -0.02333042 | -6.94712084 | 3.8800953508 | 3.8934290118 | 16.76758226 | ns |
| SORCS2      | -0.05354204 | -0.0212106  | -6.94571011 | 3.9200155035 | 3.9200155035 | 16.75863625 | ns |
| RBP7        | -0.09315889 | 0.042330818 | -6.94478885 | 3.9412956099 | 3.9278440891 | 16.743604   | ns |
| LSP1        | -0.06693509 | -0.01668445 | -6.94044457 | 4.0652623545 | 4.0376075086 | 16.71565791 | ns |
| ASGR2       | -0.03813904 | -0.00895729 | -6.93878792 | 4.1116577082 | 4.0698442399 | 16.70238447 | ns |
| SERPINA6    | 0.025958414 | 0.020901187 | 6.925378585 | 4.5190921110 | 4.4580232987 | 16.60935126 | ns |
| IMMT        | -0.06526827 | -0.00701378 | -6.92434305 | 4.5526654369 | 4.4760212376 | 16.60293303 | ns |
| CA6         | 0.103422384 | 0.055544365 | 6.912490486 | 4.9503029856 | 4.8506324557 | 16.52460056 | ns |
| CD46        | -0.0450027  | -0.00838459 | -6.90532585 | 5.2077851111 | 5.0858637205 | 16.4792806  | ns |
| LCAT        | -0.03484195 | -0.02928045 | -6.90019812 | 5.3944612672 | 5.2506089668 | 16.4376132  | ns |
| TIMP1       | -0.04346802 | -0.01831708 | -6.88618646 | 5.9574272323 | 5.7792981788 | 16.35127836 | ns |
| C1S         | -0.03180008 | -0.01995883 | -6.88507543 | 5.9975797578 | 5.7989844016 | 16.33338644 | ns |
| SFRP1       | -0.06860621 | -0.05033451 | -6.86428954 | 6.9408559344 | 6.6888776661 | 16.19846531 | ns |
| AHNAK       | -0.04835808 | -0.01915085 | -6.85922151 | 7.1930612473 | 6.9091246191 | 16.16652191 | ns |
| MMP8        | -0.11777319 | -0.03214886 | -6.83415575 | 8.5567550833 | 8.1920409322 | 15.98696547 | ns |
| IGSF3       | -0.05481719 | 0.002100542 | -6.83282948 | 8.6399065851 | 8.2446167413 | 15.98262683 | ns |
| PLA2G15     | -0.04077307 | -0.01449308 | -6.82790026 | 8.9380682861 | 8.5013548519 | 15.94623212 | ns |

|             |             |              |             |              |              |             |      |
|-------------|-------------|--------------|-------------|--------------|--------------|-------------|------|
| GIGYF2      | -0.11596109 | 0.043087227  | -6.82397274 | 9.1833738890 | 8.7063155052 | 15.91746323 | ns   |
| CKB         | 0.094891927 | 0.014531382  | 6.815782556 | 9.7213806786 | 9.1865474374 | 15.86300777 | ns   |
| AHSG        | -0.03989866 | -0.01146139  | -6.80539678 | 1.0447050911 | 9.8404479555 | 15.79339606 | ns   |
| IL19        | -0.1076821  | -0.00312237  | -6.79596278 | 1.1165892079 | 1.0483731470 | 15.74009359 | ns   |
| NECTIN4     | -0.04417926 | -0.00957149  | -6.78746121 | 1.1828142866 | 1.1069928580 | 15.67323365 | ns   |
| CXCL13      | -0.09307569 | 0.011000087  | -6.77412558 | 1.2966386358 | 1.2096437113 | 15.58130405 | ns   |
| APOM        | 0.042836389 | 0.01448561   | 6.766088216 | 1.3710481863 | 1.2749874853 | 15.53188112 | ns   |
| ULBP2       | -0.05541818 | -0.02186822  | -6.7651364  | 1.3802512548 | 1.2770298781 | 15.52675351 | ns   |
| PDGFC       | -0.04568    | -0.00982866  | -6.76503188 | 1.3819912380 | 1.2770298781 | 15.5306741  | ns   |
| FBLN2       | -0.04343154 | -0.00874705  | -6.76229095 | 1.4068697240 | 1.2959178530 | 15.50286731 | ns   |
| CD4         | -0.04638403 | -0.02624323  | -6.73534694 | 1.6936315493 | 1.5551585296 | 15.3259706  | ns   |
| FABP3       | -0.07303929 | -0.02465986  | -6.7247802  | 1.8201069085 | 1.6660539727 | 15.2516712  | ns   |
| TNFRSF12A   | -0.05242948 | -0.03569182  | -6.7063241  | 2.0651912268 | 1.8844869945 | 15.13035202 | ns   |
| FCAR        | -0.07443322 | -0.03028272  | -6.69407334 | 2.2457051980 | 2.0428221739 | 15.05018476 | ns   |
| CHRD1       | -0.04666588 | -0.02839594  | -6.69240112 | 2.2712597012 | 2.0596516545 | 15.03912785 | ns   |
| GSTA3       | -0.12383519 | -0.061480986 | -6.68173533 | 2.4442502509 | 2.2096627655 | 14.9753901  | ns   |
| GUCA2A      | 0.049383314 | 0.007761604  | 6.679620196 | 2.4784127028 | 2.2336312013 | 14.95644281 | ns   |
| LBR         | -0.10700798 | 0.035417087  | -6.6356565  | 3.3376726365 | 2.9987704919 | 14.66050896 | ns   |
| AMOT        | -0.05885932 | 0.015524282  | -6.63464323 | 3.3632279917 | 3.0124618821 | 14.66363943 | ns   |
| PAMR1       | -0.04485105 | -0.03393919  | -6.62192804 | 3.6630263533 | 3.2709593124 | 14.5735818  | ns   |
| GAPDH       | -0.04969843 | -0.08122497  | -6.62075492 | 3.6968152065 | 3.2910671960 | 14.58046019 | ns   |
| BID         | -0.10360297 | 0.014622055  | -6.61492825 | 3.8402964498 | 3.4084090071 | 14.52786082 | ns   |
| C1R         | -0.0277893  | -0.00150595  | -6.59647341 | 4.3469322630 | 3.8463764267 | 14.40404856 | ns   |
| PHLDB1      | -0.07696543 | -0.00647467  | -6.57711407 | 4.9505674350 | 4.3672679487 | 14.27838878 | ns   |
| ADH1B       | -0.11030612 | 0.054649693  | -6.56746056 | 5.2847887090 | 4.6480671778 | 14.22386195 | ns   |
| ERN1        | -0.05360109 | -0.00836406  | -6.56323637 | 5.4328933996 | 4.7639785966 | 14.18786935 | ns   |
| CXCL16      | -0.03571697 | -0.020789    | -6.55017956 | 5.9279844294 | 5.1825492616 | 14.10266761 | ns   |
| CSF3        | -0.07606254 | -0.0016873   | -6.54229713 | 6.2529783953 | 5.4503572878 | 14.06030078 | ns   |
| TGOLN2      | -0.03541465 | -0.01089464  | -6.53614074 | 6.5100205338 | 5.6575178449 | 14.01200193 | ns   |
| CTSS        | -0.03774519 | -0.01793221  | -6.51408916 | 7.6066216697 | 6.5909006752 | 13.95527088 | ns   |
| TNFRSF10C   | -0.07537509 | -0.09670437  | -6.5122407  | 7.6339277746 | 6.5949908585 | 13.85986989 | ns   |
| SORD        | -0.10458021 | -0.03154459  | -6.51090711 | 7.7002467930 | 6.6326609544 | 13.84826873 | ns   |
| REN         | -0.10393955 | -0.01075304  | -6.5036406  | 8.0829475928 | 6.9418255797 | 13.80552448 | ns   |
| ADAM12      | -0.04921447 | 0.001891794  | -6.49765116 | 8.4149977748 | 7.2058045462 | 13.77333591 | ns   |
| PLIN1       | -0.05513635 | 0.007576662  | -6.46210059 | 1.0643053061 | 9.0870511518 | 13.5433413  | ns   |
| ANGPTL2     | -0.06288099 | -0.03470297  | -6.45755135 | 1.0960456570 | 9.3121784949 | 13.50796537 | ns   |
| COL4A1      | 0.060124755 | 0.018352175  | 6.4574303   | 1.0970511651 | 9.3121784949 | 13.50849368 | ns   |
| PXN         | -0.08092343 | -0.0001078   | -6.4559883  | 1.1080435129 | 9.3782233556 | 13.50418692 | ns   |
| SPINK6      | -0.08308222 | -0.11993858  | -6.43659517 | 1.2576817832 | 1.0613961869 | 13.36936972 | ns   |
| SSC5D       | -0.06669562 | -0.05329165  | -6.42874719 | 1.3245829958 | 1.1146346823 | 13.32424127 | ns   |
| ITGA11      | 0.0510061   | 0.015084387  | 6.422200675 | 1.3826974467 | 1.1601944093 | 13.28177811 | ns   |
| LY6D        | -0.05280318 | -0.01867656  | -6.42099147 | 1.3939589930 | 1.1662923380 | 13.27715928 | ns   |
| CNTN3       | -0.05003283 | -0.041332    | -6.41668834 | 1.4334723201 | 1.1959254785 | 13.24644023 | ns   |
| FNDC1       | -0.06496518 | -0.03292912  | -6.40248262 | 1.5726815496 | 1.3083276709 | 13.15343696 | ns   |
| TMSB10      | -0.11568618 | -0.04443116  | -6.40187517 | 1.5793172229 | 1.3101154235 | 13.15226159 | ns   |
| IL2RA       | -0.0589957  | -0.01663132  | -6.3989622  | 1.6101672269 | 1.3319230319 | 13.13826921 | ns   |
| BPIFA2      | 0.156191578 | 0.132636422  | 6.393455884 | 1.6712236610 | 1.3785234718 | 13.11905342 | up   |
| CD274       | -0.04936079 | -0.00287671  | -6.39155407 | 1.6897167887 | 1.3898515558 | 13.08945074 | ns   |
| PENK        | -0.03988883 | -0.00879142  | -6.35902437 | 2.0885953091 | 1.7131175007 | 12.88776595 | ns   |
| OLR1        | -0.08753708 | 0.012470295  | -6.35439844 | 2.1522397242 | 1.7603753487 | 12.85794895 | ns   |
| LBP         | -0.08676071 | -0.06112739  | -6.35141711 | 2.1934400581 | 1.7890628407 | 12.83406831 | ns   |
| CPXM2       | -0.03353633 | -0.0228814   | -6.34297643 | 2.3162068120 | 1.8839342314 | 12.77717661 | ns   |
| ADGRG2      | 0.040400673 | 0.033110771  | 6.335526539 | 2.4314189132 | 1.9721508963 | 12.73502881 | ns   |
| PCDH9       | -0.04546644 | -0.00992646  | -6.33014075 | 2.5169016776 | 2.0358318279 | 12.69731551 | ns   |
| CLEC4G      | -0.04977902 | -0.01516147  | -6.3230179  | 2.6359874438 | 2.1262661149 | 12.6547916  | ns   |
| ST6GAL1     | -0.0427131  | -0.02674019  | -6.31544637 | 2.7671818983 | 2.2203995518 | 12.60406699 | ns   |
| TNFRSF13B   | -0.04904917 | -0.01794622  | -6.31544838 | 2.7678953317 | 2.2203995518 | 12.60810501 | ns   |
| TOMM20      | -0.10542888 | 0.041646656  | -6.31265822 | 2.8174979500 | 2.2539465993 | 12.58684617 | ns   |
| CDCP1       | -0.07175359 | -0.07187559  | -6.31229678 | 2.8251522443 | 2.2539465993 | 12.59006569 | ns   |
| ADAMTSL2    | -0.04303936 | -0.00973417  | -6.30658633 | 2.9299567962 | 2.3311917834 | 12.54918477 | ns   |
| TFPI2       | -0.05294875 | -0.00301056  | -6.30361272 | 2.9869994752 | 2.3701191488 | 12.53262307 | ns   |
| HHEX        | -0.10701766 | -0.03271949  | -6.30050823 | 3.0468017562 | 2.4110192759 | 12.51088234 | ns   |
| EPHB6       | -0.04328564 | 0.000193873  | -6.28913644 | 3.2794470232 | 2.5881041372 | 12.44617371 | ns   |
| DEFB4A_DEFB | -0.21498025 | -0.14645893  | -6.28546425 | 3.3581321774 | 2.6379557615 | 12.42447699 | down |
| IL1RAP      | 0.066934968 | 0.143366245  | 6.28528976  | 3.3606833675 | 2.6379557615 | 12.41859723 | ns   |
| AIFM1       | -0.1548151  | -0.00148481  | -6.28351001 | 3.3998806433 | 2.6615687610 | 12.4104037  | ns   |

|           |             |             |             |              |              |             |    |
|-----------|-------------|-------------|-------------|--------------|--------------|-------------|----|
| IGLC2     | -0.03196574 | 0.004191152 | -6.27788429 | 3.5236653054 | 2.7510969764 | 12.37035969 | ns |
| ENPP6     | 0.052264853 | 0.036315162 | 6.274322662 | 3.6074871688 | 2.8090300088 | 12.3576517  | ns |
| FGF23     | -0.07966798 | 0.061514744 | -6.26830754 | 3.7465162247 | 2.9095285575 | 12.30920115 | ns |
| HYOU1     | -0.03117953 | -0.01521823 | -6.26371802 | 3.8581348257 | 2.9882635785 | 12.28127849 | ns |
| CES1      | -0.11895042 | 0.040288191 | -6.25653895 | 4.0404390289 | 3.1211857049 | 12.24052697 | ns |
| SETMAR    | -0.04587887 | -0.01864916 | -6.24297444 | 4.4071766085 | 3.3955028224 | 12.15961578 | ns |
| FCRL1     | -0.065812   | -0.0024533  | -6.23462739 | 4.6473112173 | 3.5710917775 | 12.10592709 | ns |
| FCN1      | -0.07622305 | -0.06135624 | -6.23099395 | 4.7550900783 | 3.6443210049 | 12.08046769 | ns |
| STAB2     | -0.03976547 | -0.03118137 | -6.21739407 | 5.1844171542 | 3.9629576153 | 11.99505549 | ns |
| BCHE      | -0.03884724 | -0.02785392 | -6.21579986 | 5.2401897915 | 3.9951316426 | 11.99388562 | ns |
| CST7      | -0.13830749 | 0.069101993 | -6.18945083 | 6.1908345091 | 4.7076137413 | 11.82663301 | ns |
| BMP10     | 0.038813165 | 0.01137317  | 6.188873051 | 6.2156255120 | 4.7141887000 | 11.82885408 | ns |
| PPL       | -0.04319302 | -0.00607081 | -6.18732228 | 6.2780682071 | 4.7492122188 | 11.82115802 | ns |
| THBD      | -0.0390757  | -0.01595167 | -6.18400424 | 6.4082745134 | 4.8351838706 | 11.79407927 | ns |
| C4BPB     | -0.05576153 | 0.004697046 | -6.1667575  | 7.1440569047 | 5.3764551963 | 11.68532379 | ns |
| B4GALT1   | -0.0377772  | -0.01137044 | -6.15654099 | 7.6193158077 | 5.7193835883 | 11.62339121 | ns |
| GAST      | -0.15663533 | 0.237719385 | -6.150499   | 7.9135370427 | 5.9250072217 | 11.58430899 | ns |
| SGSH      | -0.07514351 | -0.01126797 | -6.14628231 | 8.1293986327 | 6.0710598484 | 11.56448305 | ns |
| S100A11   | -0.06584725 | 0.026371865 | -6.13981031 | 8.4675779994 | 6.3074815709 | 11.52664268 | ns |
| ARSB      | -0.07998281 | -0.00677018 | -6.13670926 | 8.6325341164 | 6.4139948142 | 11.50525258 | ns |
| F11R      | -0.08182825 | 0.017438556 | -6.1347752  | 8.7369681157 | 6.4751134259 | 11.49125838 | ns |
| OSCAR     | -0.04765294 | -0.0420941  | -6.11274962 | 1.0029715658 | 7.4143720816 | 11.35846017 | ns |
| LRCH4     | -0.0934631  | 0.028761743 | -6.11137042 | 1.0121781072 | 7.4635355380 | 11.35729437 | ns |
| LRRC25    | -0.05540648 | -0.0111443  | -6.10769962 | 1.0352306817 | 7.6142911607 | 11.32904349 | ns |
| BTN3A2    | -0.05253895 | -0.03912376 | -6.10129318 | 1.0774132542 | 7.9046399555 | 11.28826491 | ns |
| DSG2      | 0.038072386 | 0.024864908 | 6.099219944 | 1.0914030015 | 7.9872099362 | 11.27546365 | ns |
| AREG      | -0.06245404 | 0.02018985  | -6.09138292 | 1.1461955369 | 8.3672274196 | 11.23029841 | ns |
| ADAMTS8   | 0.063536211 | 0.03360228  | 6.058002854 | 1.4102190347 | 1.0268926636 | 11.02573975 | ns |
| SFRP4     | -0.05498358 | 0.021823741 | -6.05589801 | 1.4293693480 | 1.0382483821 | 11.02119433 | ns |
| DUT       | -0.13455312 | -0.03891855 | -6.05519806 | 1.4348954341 | 1.0396760962 | 11.00799921 | ns |
| PDCD1     | -0.05789282 | 0.010834746 | -6.05294627 | 1.4549867233 | 1.0516240673 | 10.99299537 | ns |
| TMPRSS11D | -0.04781024 | 0.003513503 | -6.05157244 | 1.4674504774 | 1.0580136775 | 10.98582692 | ns |
| DDAH1     | -0.06258886 | 0.0037605   | -6.05011304 | 1.4811815929 | 1.0652833131 | 10.98171536 | ns |
| SULT2A1   | -0.07624497 | 0.05863813  | -6.02506431 | 1.7290708048 | 1.2405127150 | 10.82966525 | ns |
| UMOD      | 0.075922239 | 0.009973374 | 6.019632976 | 1.7875934354 | 1.2793560861 | 10.79445511 | ns |
| PON2      | -0.04921285 | -0.03382266 | -6.01326292 | 1.8602760469 | 1.3281188403 | 10.7663143  | ns |
| MMP12     | -0.07158564 | -0.05599083 | -5.989622   | 2.1501545594 | 1.5313295886 | 10.61733077 | ns |
| PHOSPHO1  | -0.04062981 | -0.03324967 | -5.98853454 | 2.1648960744 | 1.5380770164 | 10.61449421 | ns |
| CPE       | 0.054270265 | -0.03581652 | 5.980008933 | 2.2805269164 | 1.6162957757 | 10.55966484 | ns |
| NCF2      | -0.12024807 | 0.06640549  | -5.97723445 | 2.3199452635 | 1.6402518570 | 10.54561642 | ns |
| CCL23     | -0.05718112 | -0.02345672 | -5.96626553 | 2.4805982554 | 1.7496007018 | 10.47898415 | ns |
| FAS       | -0.04535006 | -0.00716048 | -5.94302857 | 2.8582374708 | 2.0110972083 | 10.34083453 | ns |
| TALDO1    | -0.05900991 | -0.00492585 | -5.942603   | 2.8657796963 | 2.0115569022 | 10.33875233 | ns |
| CRELD2    | -0.07200373 | -0.02925098 | -5.92845074 | 3.1235021628 | 2.1869884420 | 10.2566855  | ns |
| PILRB     | -0.07906814 | -0.12970868 | -5.92808923 | 3.1306889341 | 2.1869884420 | 10.25632199 | ns |
| KHK       | -0.08395591 | -0.05240327 | -5.92348873 | 3.2204170658 | 2.2443001986 | 10.2349463  | ns |
| EDA2R     | -0.04685967 | -0.05887849 | -5.91298615 | 3.4301251856 | 2.3827774684 | 10.16131262 | ns |
| WFIKN2    | 0.049930853 | 0.029312183 | 5.91276707  | 3.4354428569 | 2.3827774684 | 10.16531573 | ns |
| DNMBP     | -0.08712935 | 0.06235885  | -5.8941254  | 3.8460797645 | 2.6612684627 | 10.05790777 | ns |
| EPHB4     | -0.03115409 | -0.01053221 | -5.88091186 | 4.1640066305 | 2.8744442934 | 9.974662722 | ns |
| RET       | -0.05416414 | -0.01237474 | -5.87674566 | 4.2710891867 | 2.9414104776 | 9.955836514 | ns |
| CXCL10    | -0.09264809 | 0.031406084 | -5.87522375 | 4.3097542325 | 2.9610546727 | 9.944063318 | ns |
| ENTR1     | -0.07514524 | 0.065945696 | -5.87203026 | 4.3954302997 | 3.0128301585 | 9.933818573 | ns |
| CNTN1     | 0.03705981  | 0.024234468 | 5.864123944 | 4.6068897401 | 3.1503789323 | 9.876819382 | ns |
| ACE2      | -0.06521056 | 0.018380216 | -5.85809665 | 4.7796444954 | 3.2608789548 | 9.852491373 | ns |
| CD300LF   | -0.08167153 | -0.16256069 | -5.84312931 | 5.2255500023 | 3.5567846169 | 9.753784277 | ns |
| ZBTB17    | -0.05227511 | 0.004713698 | -5.84073299 | 5.3042719619 | 3.6019707276 | 9.751710644 | ns |
| MEGF10    | 0.054386036 | 0.010438591 | 5.839276129 | 5.3489206907 | 3.6238627417 | 9.737851023 | ns |
| DTNB      | -0.05513558 | -0.00528024 | -5.83825131 | 5.3812167865 | 3.6373039390 | 9.728665561 | ns |
| PDZK1     | -0.05571121 | 0.020532367 | -5.83423082 | 5.5150398377 | 3.7191492670 | 9.715567384 | ns |
| MAMDC2    | -0.04185878 | -0.00412573 | -5.83333802 | 5.5412839408 | 3.7282371214 | 9.698382396 | ns |
| TPP1      | -0.06074714 | -0.01642557 | -5.82332632 | 5.8853337327 | 3.9506148275 | 9.649040375 | ns |
| GCHFR     | -0.06586444 | 0.002623943 | -5.82202427 | 5.9345456636 | 3.9745122334 | 9.652398705 | ns |
| SCARA5    | -0.03841458 | -0.04072241 | -5.80644598 | 6.5061046398 | 4.3473285007 | 9.542300403 | ns |
| ELOA      | -0.0760375  | 0.022069614 | -5.80183543 | 6.6889566978 | 4.4583635754 | 9.521750608 | ns |
| ADGRG1    | -0.08375467 | 0.085784056 | -5.80148773 | 6.7028137315 | 4.4583635754 | 9.5197487   | ns |

|              |             |             |              |              |              |             |    |
|--------------|-------------|-------------|--------------|--------------|--------------|-------------|----|
| BAG3         | -0.05523487 | -0.04105563 | -5.7998617   | 6.7684821389 | 4.4918108740 | 9.51169251  | ns |
| MYH9         | -0.14387473 | -0.01766112 | -5.7949778   | 6.9658519945 | 4.6123101642 | 9.47738985  | ns |
| HDGFL2       | -0.08152296 | 0.024071242 | -5.79295766  | 7.0498610525 | 4.6573742700 | 9.465460488 | ns |
| SPON1        | -0.04215515 | -0.03630137 | -5.77562369  | 7.8151774753 | 5.1513133697 | 9.369919373 | ns |
| FSTL1        | -0.02751406 | -0.01952285 | -5.76680623  | 8.2370302807 | 5.4171460405 | 9.326204583 | ns |
| AMN          | -0.06407529 | -0.00356769 | -5.76356459  | 8.3962316218 | 5.5094373788 | 9.307061324 | ns |
| SMNDC1       | -0.07857907 | 0.040771788 | -5.7562595   | 8.7628637666 | 5.7371215692 | 9.255959137 | ns |
| PARP1        | -0.07408787 | 0.039102978 | -5.74649221  | 9.2843248374 | 6.0649280817 | 9.20256206  | ns |
| FGR          | -0.07975597 | 0.049065703 | -5.74008628  | 9.6449639765 | 6.2864497346 | 9.17328025  | ns |
| SMAD5        | -0.02746818 | -0.03768428 | -5.721109045 | 1.0782290193 | 6.9971676941 | 9.060062638 | ns |
| HMOX2        | -0.06230803 | 0.033659794 | -5.72112251  | 1.0783306377 | 6.9971676941 | 9.065437811 | ns |
| ITGBL1       | -0.04211304 | 0.002287456 | -5.71340569  | 1.1277350505 | 7.3015218349 | 9.011514955 | ns |
| MRC1         | -0.03535424 | -0.02580756 | -5.70051983  | 1.2162017517 | 7.8568785732 | 8.939113809 | ns |
| ACP5         | -0.04355879 | -0.05512518 | -5.69939256  | 1.2243524441 | 7.8920731501 | 8.934149062 | ns |
| CFHR5        | -0.05077647 | -0.05389789 | -5.68565883  | 1.3269746678 | 8.5347269386 | 8.860615546 | ns |
| KCTD5        | -0.05535308 | -0.00222491 | -5.68133552  | 1.3609811544 | 8.7336639327 | 8.837750107 | ns |
| GIPC2        | -0.03583748 | -0.00497731 | -5.68090719  | 1.3638872442 | 8.7336639327 | 8.827424624 | ns |
| SIGLEC10     | -0.04387283 | -0.01629258 | -5.67981834  | 1.3728276940 | 8.7716780449 | 8.8245004   | ns |
| KYNU         | -0.06033082 | -0.01720816 | -5.6729778   | 1.4283814660 | 9.1067115305 | 8.78192901  | ns |
| TGFB1        | -0.05044974 | -0.01279642 | -5.66789831  | 1.4713170617 | 9.3600126806 | 8.753846001 | ns |
| CELSR2       | -0.03440502 | -0.00448069 | -5.66414164  | 1.5044780415 | 9.5501649591 | 8.743254393 | ns |
| COCH         | -0.05614894 | -0.01111773 | -5.66175018  | 1.5249487960 | 9.6591116799 | 8.719531629 | ns |
| CCL3         | -0.07251743 | -0.02506131 | -5.65730461  | 1.5651382301 | 9.8922156536 | 8.697832764 | ns |
| VNN2         | -0.06210622 | -0.07590843 | -5.65674558  | 1.5703151743 | 9.9034995874 | 8.696760927 | ns |
| SDC1         | -0.04932452 | -0.00568996 | -5.64954134  | 1.6373985530 | 1.0304318480 | 8.656092149 | ns |
| HSPB6        | -0.04963133 | -0.02650018 | -5.64842109  | 1.6476836826 | 1.0346744845 | 8.64335513  | ns |
| HIP1R        | -0.05233616 | 0.001337291 | -5.64380052  | 1.6925427419 | 1.0605632632 | 8.619681145 | ns |
| VSNL1        | -0.04535903 | 0.002937973 | -5.63757617  | 1.7546650511 | 1.0971353210 | 8.584017231 | ns |
| PROK1        | -0.08240985 | -0.09842003 | -5.62514434  | 1.8858883632 | 1.1756187925 | 8.517760309 | ns |
| FOLR2        | -0.03808163 | -0.01235875 | -5.62489763  | 1.8882370332 | 1.1756187925 | 8.512333998 | ns |
| THOP1        | -0.04111312 | -0.00935662 | -5.60702381  | 2.0941050951 | 1.3010184846 | 8.420267119 | ns |
| NELL1        | 0.052482643 | 0.038081458 | 5.603091214  | 2.1416055020 | 1.3277044725 | 8.393400123 | ns |
| ANGPTL4      | -0.05961922 | -0.05190204 | -5.59711947  | 2.2166445563 | 1.3713140052 | 8.361676149 | ns |
| PTPRS        | -0.03124378 | 0.002261013 | -5.58970786  | 2.3128382897 | 1.4277986904 | 8.316953041 | ns |
| LGALS7_LGALS | -0.05320798 | -0.00016966 | -5.57942408  | 2.4540265475 | 1.5117631896 | 8.264873614 | ns |
| MSR1         | -0.06023563 | -0.07517273 | -5.57028645  | 2.5854855163 | 1.5893932016 | 8.208886236 | ns |
| SIGLEC1      | -0.05583839 | -0.0364217  | -5.56781721  | 2.6225654034 | 1.6088006256 | 8.198394207 | ns |
| CFHR2        | -0.06889877 | -0.12068006 | -5.54446563  | 2.9971222405 | 1.8347163401 | 8.070343472 | ns |
| SIGLEC6      | -0.04174543 | -0.02438559 | -5.53632113  | 3.1390026466 | 1.9175497339 | 8.021042842 | ns |
| HEG1         | -0.03240565 | -0.03468438 | -5.53557853  | 3.1535596983 | 1.9224205259 | 8.028745896 | ns |
| AZU1         | -0.10053639 | 0.066564546 | -5.53063859  | 3.2448974803 | 1.9739793005 | 8.010837631 | ns |
| MIA          | -0.04640788 | 0.014763211 | -5.52889649  | 3.2747849171 | 1.9880191181 | 7.983471867 | ns |
| SELENOP      | 0.026401424 | 0.003889723 | 5.520818804  | 3.4284508201 | 2.0769868038 | 7.937308009 | ns |
| XCL1         | -0.07187198 | 0.011526021 | -5.50960948  | 3.6535359222 | 2.2087629178 | 7.874588661 | ns |
| FGF21        | -0.15584803 | -0.12870227 | -5.50397417  | 3.7721741698 | 2.2757744991 | 7.844464621 | ns |
| CD40         | -0.063645   | 0.023642807 | -5.4862342   | 4.1710403998 | 2.5098608951 | 7.753533021 | ns |
| VEGFA        | -0.07492897 | 0.029447754 | -5.48593863  | 4.1773712158 | 2.5098608951 | 7.747662435 | ns |
| ADAM22       | -0.04336767 | -0.00237658 | -5.48276783  | 4.2536747388 | 2.5504579542 | 7.73554073  | ns |
| IL18         | -0.05899834 | -0.0342467  | -5.47643833  | 4.4082485798 | 2.6377225109 | 7.701302367 | ns |
| TXNDC15      | -0.03393632 | 0.000448018 | -5.47599677  | 4.4185231177 | 2.6384637022 | 7.69452287  | ns |
| ESYT2        | -0.09920509 | 0.031658512 | -5.47494796  | 4.4444376914 | 2.6485220528 | 7.687027317 | ns |
| FUOM         | -0.07674071 | -0.00858004 | -5.46934288  | 4.5886636764 | 2.7288997831 | 7.66700817  | ns |
| CEACAM16     | -0.09514772 | -0.02144254 | -5.46563445  | 4.6839432178 | 2.7799012593 | 7.637307039 | ns |
| AGXT         | -0.09849651 | 0.063705728 | -5.46031484  | 4.8269531262 | 2.8589661518 | 7.612744521 | ns |
| DMD          | -0.06187959 | 0.068997858 | -5.44558954  | 5.2442251010 | 3.0998253633 | 7.539019495 | ns |
| TFF3         | -0.05646139 | 0.034613405 | -5.44425778  | 5.2825114225 | 3.1161481523 | 7.527248806 | ns |
| NCAM2        | 0.035544969 | 0.025691835 | 5.442580221  | 5.3318845949 | 3.1389320599 | 7.514639606 | ns |
| RGMB         | -0.03157825 | 0.002459327 | -5.43122133  | 5.6812570499 | 3.3378814055 | 7.449484263 | ns |
| RNASE3       | -0.14004359 | 0.064748747 | -5.43023076  | 5.7142931644 | 3.3505494056 | 7.451966661 | ns |
| PKD2         | -0.07085661 | 0.05123548  | -5.42708884  | 5.8168062476 | 3.4038224936 | 7.439948179 | ns |
| CLEC14A      | -0.03779954 | -0.01898047 | -5.42584942  | 5.8552698088 | 3.4194775683 | 7.424383669 | ns |
| CCL19        | -0.15165468 | 0.236038158 | -5.42164573  | 5.9936060970 | 3.4932794018 | 7.397897942 | ns |
| APOA1        | 0.032110517 | 0.031703827 | 5.419657996  | 6.0605745850 | 3.5252744598 | 7.387951402 | ns |
| BMPER        | -0.02600511 | -0.01125567 | -5.41439046  | 6.2434856372 | 3.6244489186 | 7.370184256 | ns |
| AFM          | -0.02382518 | -0.01221922 | -5.41068969  | 6.3714904189 | 3.6914190522 | 7.339737146 | ns |
| PRND         | -0.05661879 | 0.015342246 | -5.39929882  | 6.7886943594 | 3.9253440652 | 7.278690024 | ns |

|          |             |             |             |              |              |             |    |
|----------|-------------|-------------|-------------|--------------|--------------|-------------|----|
| ZHX2     | -0.03995854 | 0.027861721 | -5.39163885 | 7.0840327442 | 4.0880188958 | 7.237658729 | ns |
| NRCAM    | -0.03424562 | 0.002249471 | -5.37488554 | 7.7753915314 | 4.4781347676 | 7.153307954 | ns |
| CDH3     | -0.04224893 | 0.008297827 | -5.37203281 | 7.8977364642 | 4.5396437943 | 7.132071903 | ns |
| LEPR     | 0.040138736 | 0.027827652 | 5.359616005 | 8.4607258940 | 4.8536973694 | 7.071949095 | ns |
| CD80     | -0.03771382 | -0.01691122 | -5.35545238 | 8.6560861870 | 4.9560336600 | 7.044557507 | ns |
| VIT      | -0.0423812  | -0.04245974 | -5.3550525  | 8.6752160954 | 4.9572663402 | 7.042431424 | ns |
| NFKBIE   | -0.06247829 | 0.023023827 | -5.35140778 | 8.8551786187 | 5.0502190560 | 7.034742463 | ns |
| APEX1    | -0.07562925 | -0.01695463 | -5.33646531 | 9.6112203356 | 5.4707141092 | 6.943988754 | ns |
| VASN     | -0.0339403  | -0.01119955 | -5.3174445  | 1.0674639830 | 6.0641922772 | 6.857803067 | ns |
| PAXX     | -0.05271388 | 0.01019013  | -5.31697667 | 1.0700328408 | 6.0669823206 | 6.851344385 | ns |
| KIT      | 0.036350134 | 0.015016934 | 5.307826175 | 1.1248588954 | 6.3654805711 | 6.797069619 | ns |
| FRZB     | -0.03210092 | -0.03604365 | -5.30369165 | 1.1507251808 | 6.4992602088 | 6.778599224 | ns |
| LPL      | 0.0593166   | 0.009287675 | 5.302326503 | 1.1592461115 | 6.5347464202 | 6.768755753 | ns |
| CWC15    | -0.07278121 | 0.103608748 | -5.29632608 | 1.1978199111 | 6.7391794614 | 6.735293387 | ns |
| TPK1     | -0.03094341 | -0.00937659 | -5.29269967 | 1.2216699284 | 6.8601465214 | 6.712849074 | ns |
| SNRPB2   | -0.05098242 | 0.03765377  | -5.29022246 | 1.2382898855 | 6.9401275734 | 6.69988435  | ns |
| PTP4A3   | -0.06064591 | 0.02628235  | -5.28820078 | 1.2525479494 | 7.0065900622 | 6.701923409 | ns |
| JAM2     | -0.02952658 | -0.01175586 | -5.2877295  | 1.2552419020 | 7.0082339463 | 6.685958213 | ns |
| SCAMP3   | -0.10666854 | 0.02090481  | -5.28654208 | 1.2636308210 | 7.0416068651 | 6.686046621 | ns |
| LAMA4    | -0.04006105 | -0.00547047 | -5.280379   | 1.3066701352 | 7.2675748474 | 6.650635761 | ns |
| TNFRSF17 | -0.04556291 | -0.03280297 | -5.27847857 | 1.3205840381 | 7.3309988426 | 6.648885119 | ns |
| DPP6     | 0.041500115 | 0.021483137 | 5.27059186  | 1.3783138103 | 7.6369569757 | 6.60246036  | ns |
| CFC1     | -0.05662881 | 0.017080982 | -5.25191208 | 1.5257912211 | 8.4380878139 | 6.511128086 | ns |
| FMNL1    | -0.0784494  | 0.016024313 | -5.2483819  | 1.5552236218 | 8.5845991981 | 6.491947284 | ns |
| CNTN5    | 0.045112437 | 0.045766772 | 5.234558462 | 1.6754596674 | 9.2308343944 | 6.409813037 | ns |
| MSLN     | -0.06803888 | 0.033705889 | -5.2232989  | 1.7807329716 | 9.7775350693 | 6.357010927 | ns |
| NT5E     | -0.06825779 | 0.037834143 | -5.22320392 | 1.7813865263 | 9.7775350693 | 6.351929525 | ns |
| TNFRSF6B | -0.06709249 | -0.0338869  | -5.21300224 | 1.8823101180 | 1.0312092954 | 6.303371839 | ns |
| CD8A     | -0.0601006  | -0.01229686 | -5.20998405 | 1.9127568932 | 1.0459269903 | 6.280778993 | ns |
| TAX1BP1  | -0.07345563 | 0.078405696 | -5.20509167 | 1.9637635950 | 1.0718111584 | 6.25632174  | ns |
| SFTPA2   | -0.0604332  | 0.029464584 | -5.19986562 | 2.0204648349 | 1.1007009921 | 6.241124285 | ns |
| RSPO3    | -0.03178453 | -0.01457522 | -5.18033327 | 2.2426202147 | 1.2194508430 | 6.127206137 | ns |
| TRIAP1   | -0.07716199 | -0.0090717  | -5.17613666 | 2.2935389161 | 1.2448203782 | 6.105628072 | ns |
| HAVCR1   | -0.07134035 | -0.07149016 | -5.16830615 | 2.3915896905 | 1.2956292943 | 6.065857283 | ns |
| CILP     | -0.06020866 | -0.08372801 | -5.16118925 | 2.4842064151 | 1.3433116170 | 6.030711188 | ns |
| EGFR     | 0.01913092  | 0.012870119 | 5.158065828 | 2.5258680435 | 1.3633150993 | 6.01403449  | ns |
| MTDH     | -0.10319293 | -0.00682864 | -5.15553401 | 2.5611683845 | 1.3798176536 | 6.014219053 | ns |
| TPR      | -0.05563436 | 0.035559665 | -5.15142194 | 2.6178818618 | 1.4077744082 | 5.992592839 | ns |
| RPL14    | -0.04523265 | 0.018893004 | -5.1473135  | 2.6756470324 | 1.4361928924 | 5.970809945 | ns |
| ENAH     | -0.05658312 | -0.00498068 | -5.14487166 | 2.7105599607 | 1.4522633183 | 5.957695955 | ns |
| FABP1    | -0.11466155 | -0.09211696 | -5.14420043 | 2.7197704938 | 1.4545292750 | 5.948823178 | ns |
| GH1      | 0.222065912 | 0.313304763 | 5.143056028 | 2.7364557885 | 1.4602073221 | 5.943343852 | up |
| RRM2     | -0.06097793 | 0.037135017 | -5.14282294 | 2.7403890840 | 1.4602073221 | 5.948278938 | ns |
| PLIN3    | -0.05090915 | 0.011751979 | -5.13497867 | 2.8563666343 | 1.5192332554 | 5.901693427 | ns |
| ACAA1    | -0.09791753 | 0.00510804  | -5.12349983 | 3.0362709351 | 1.6119838419 | 5.84980792  | ns |
| GFER     | -0.07819907 | 0.021887839 | -5.11761194 | 3.1324024387 | 1.6600027442 | 5.819876535 | ns |
| RASSF2   | -0.06975146 | 0.032255231 | -5.10627386 | 3.3258636128 | 1.7593336502 | 5.762335442 | ns |
| APOD     | 0.048348709 | 0.047112269 | 5.101117234 | 3.4182983703 | 1.8049604414 | 5.744277943 | ns |
| ACY1     | -0.0746287  | -0.00095489 | -5.09825807 | 3.4688181260 | 1.8237549437 | 5.715143586 | ns |
| SIAE     | -0.05598153 | -0.00954337 | -5.09795416 | 3.4741191272 | 1.8237549437 | 5.710848408 | ns |
| LGMN     | -0.04278607 | -0.01921954 | -5.09785176 | 3.4759714551 | 1.8237549437 | 5.710213173 | ns |
| PRTG     | 0.029016961 | 0.009911725 | 5.097678299 | 3.4788750124 | 1.8237549437 | 5.705420606 | ns |
| MVK      | -0.09252211 | -0.01441882 | -5.0830579  | 3.7584402548 | 1.9667823555 | 5.643858853 | ns |
| NADK     | -0.06498577 | 0.003413089 | -5.06608217 | 4.1081257291 | 2.1446134336 | 5.552778792 | ns |
| ACHE     | 0.035651482 | 0.032052004 | 5.065881654 | 4.1129572700 | 2.1446134336 | 5.557251652 | ns |
| PLA2G2A  | -0.06618717 | 0.038841251 | -5.06075623 | 4.2244232520 | 2.1988085375 | 5.525978821 | ns |
| HAO1     | -0.15276008 | 0.020620964 | -5.05286852 | 4.4016864586 | 2.2869972347 | 5.479584097 | ns |
| HS6ST2   | -0.03508783 | 0.026341478 | -5.03297397 | 4.8850772460 | 2.5336457475 | 5.39437642  | ns |
| CYTL1    | -0.0251524  | -0.0130558  | -5.03176714 | 4.9142533678 | 2.5442588358 | 5.375739254 | ns |
| C2       | -0.02824926 | -0.03676342 | -5.02937995 | 4.9762847750 | 2.5718144324 | 5.368157507 | ns |
| KLRD1    | -0.05427464 | -0.02532786 | -5.01888721 | 5.2546473301 | 2.7108781279 | 5.310259254 | ns |
| TOP2B    | -0.08698998 | 0.014177289 | -5.01720561 | 5.3026802938 | 2.7308335904 | 5.315707585 | ns |
| QDPR     | -0.05087148 | -0.01044036 | -5.01611384 | 5.3320731648 | 2.7411362044 | 5.305023628 | ns |
| TNFSF10  | -0.03042748 | -0.01090176 | -5.01135594 | 5.4642152925 | 2.8041315736 | 5.272751099 | ns |
| CRLF1    | -0.03044425 | -0.00557887 | -4.9993126  | 5.8166630340 | 2.9797642209 | 5.216219778 | ns |
| LY96     | -0.04184726 | -0.01404267 | -4.99806962 | 5.8548179323 | 2.9888464442 | 5.213835252 | ns |

|          |             |              |             |              |              |             |    |
|----------|-------------|--------------|-------------|--------------|--------------|-------------|----|
| AOC3     | 0.035123119 | -0.00902145  | 4.998056762 | 5.8548635825 | 2.9888464442 | 5.211775357 | ns |
| HSD11B1  | 0.047368518 | 0.013495465  | 4.996189027 | 5.9117650740 | 3.0126272279 | 5.201695364 | ns |
| FCRL5    | -0.06682964 | -0.05477698  | -4.99462453 | 5.9597040958 | 3.0317658466 | 5.193638708 | ns |
| ERP44    | -0.03046498 | -0.00243641  | -4.99276626 | 6.0176745442 | 3.0559321163 | 5.187423898 | ns |
| SUMF2    | -0.06170474 | -0.07254732  | -4.98623262 | 6.2233039889 | 3.1548693832 | 5.148050334 | ns |
| SEL1L    | -0.03408459 | 0.00306191   | -4.98426745 | 6.2886969327 | 3.1824948082 | 5.150783609 | ns |
| DCXR     | -0.06321844 | 0.019268869  | -4.97578892 | 6.5681877811 | 3.3181848305 | 5.099118713 | ns |
| LETM1    | -0.05710906 | 0.027133092  | -4.9715267  | 6.7136340632 | 3.3858050888 | 5.075373225 | ns |
| GPKOW    | -0.03331163 | -0.00350804  | -4.96335061 | 7.0044049538 | 3.5263555974 | 5.047100695 | ns |
| MMP7     | -0.05133168 | -0.07096548  | -4.95855559 | 7.1792873283 | 3.6081788293 | 5.024331194 | ns |
| CSDE1    | -0.13043434 | 0.236191659  | -4.94330327 | 7.7637667002 | 3.8952231554 | 4.949688906 | ns |
| SPOCK1   | 0.02934704  | 0.00351267   | 4.940559433 | 7.8723373714 | 3.9429202615 | 4.93005716  | ns |
| SUSD4    | -0.04382561 | 0.018281077  | -4.92193853 | 8.6574636353 | 4.3287318176 | 4.833415233 | ns |
| IGFBP1   | -0.03642793 | -0.00875039  | -4.9190114  | 8.7885493472 | 4.3867630929 | 4.82368038  | ns |
| DLK1     | -0.06286828 | -0.01779627  | -4.91345298 | 9.0399075370 | 4.5045273051 | 4.790798169 | ns |
| SPINK1   | -0.04355555 | -0.00950071  | -4.91160554 | 9.1262358176 | 4.5397970336 | 4.785300663 | ns |
| WASHC3   | -0.08279272 | 0.072432157  | -4.9022141  | 9.5721326929 | 4.7535080720 | 4.736366005 | ns |
| TIGIT    | -0.03832511 | 0.007857633  | -4.89977244 | 9.6931549689 | 4.8054350610 | 4.731410601 | ns |
| ECHS1    | -0.10239163 | -0.02536621  | -4.89889721 | 9.7376009512 | 4.8192872504 | 4.731913981 | ns |
| NUDT5    | -0.05933238 | 0.009041588  | -4.88434058 | 1.0481975289 | 5.1789116488 | 4.652683201 | ns |
| TNFSF13B | -0.03007997 | -0.01005825  | -4.87838352 | 1.0802216742 | 5.3281204200 | 4.621087108 | ns |
| GASK1A   | -0.04655326 | -0.01555889  | -4.86684767 | 1.1454292309 | 5.6402248810 | 4.577327147 | ns |
| ANXA2    | -0.07605987 | 0.022895266  | -4.86362655 | 1.1643445835 | 5.7237141145 | 4.567380874 | ns |
| SCN4B    | -0.04330452 | -0.01807436  | -4.85928151 | 1.1899712028 | 5.8398586761 | 4.539989561 | ns |
| PBXIP1   | -0.03259438 | 0.009272955  | -4.85191041 | 1.2346962504 | 6.0491829718 | 4.493622195 | ns |
| NCR1     | -0.04000131 | 0.008840206  | -4.84804529 | 1.2590484895 | 6.1581601161 | 4.477584533 | ns |
| ALDH1A1  | -0.06133459 | 0.032720692  | -4.84599673 | 1.2720714097 | 6.2114523688 | 4.467423002 | ns |
| PEBP1    | -0.06773449 | 0.00087832   | -4.84295497 | 1.2916779204 | 6.2966603135 | 4.452788908 | ns |
| GPC1     | -0.03216532 | -0.00822718  | -4.81601826 | 1.4783301788 | 7.1945402036 | 4.318902306 | ns |
| SCPEP1   | -0.0526256  | -0.00077027  | -4.81415166 | 1.4926497533 | 7.2521418962 | 4.324840951 | ns |
| CHGA     | -0.08089554 | 0.07489896   | -4.80985429 | 1.5246192904 | 7.3951633356 | 4.291281889 | ns |
| PLSCR3   | -0.06305173 | 0.021866194  | -4.80513052 | 1.5610127968 | 7.5591332782 | 4.268986507 | ns |
| BOC      | 0.026502147 | 0.00589777   | 4.802796367 | 1.5796996507 | 7.6369585764 | 4.268776273 | ns |
| SRP14    | -0.07021303 | -0.01340821  | -4.79383946 | 1.6515793404 | 7.9712589652 | 4.220277872 | ns |
| KIF1C    | -0.03741283 | 0.023050998  | -4.78879445 | 1.6938564147 | 8.1618163880 | 4.203152907 | ns |
| CHCHD6   | -0.02904569 | 0.005997195  | -4.78825165 | 1.6980010625 | 8.1683082414 | 4.188809626 | ns |
| CEACAM19 | -0.04024419 | -0.03398322  | -4.78679337 | 1.7103485932 | 8.2141741648 | 4.181948001 | ns |
| STX4     | -0.06965616 | 0.071075477  | -4.77951884 | 1.7734869560 | 8.5034185740 | 4.152202604 | ns |
| HPSE     | -0.09724906 | -0.08430357  | -4.77906972 | 1.7774855015 | 8.5086191220 | 4.150526181 | ns |
| SBSN     | -0.03505306 | 0.002892931  | -4.77331655 | 1.8287606688 | 8.7397400212 | 4.118398523 | ns |
| TNFSF14  | -0.06584437 | -0.01293491  | -4.76665337 | 1.8903760003 | 9.0194410472 | 4.09185426  | ns |
| INPP5D   | -0.06100195 | 0.010741509  | -4.75844803 | 1.9689614027 | 9.3790657357 | 4.058495292 | ns |
| GBP1     | -0.06772518 | -0.01883414  | -4.7386651  | 2.1704413471 | 1.0321968621 | 3.954052965 | ns |
| CLEC4A   | 0.038683998 | 0.005587358  | 4.735758185 | 2.2018985514 | 1.0454542715 | 3.943212671 | ns |
| TDP1     | -0.07430009 | 0.089321489  | -4.7353801  | 2.2058669549 | 1.0456382318 | 3.938759157 | ns |
| IL4R     | -0.03818357 | -0.01938261  | -4.72108741 | 2.3666056573 | 1.1200143467 | 3.874316921 | ns |
| SORBS1   | -0.0407061  | 0.031570506  | -4.71207003 | 2.4733966577 | 1.1686599094 | 3.827718091 | ns |
| HCLS1    | -0.06219302 | -0.04580436  | -4.71172899 | 2.4775220644 | 1.1687180013 | 3.826068959 | ns |
| PAM      | -0.03060165 | -0.0376591   | -4.71108818 | 2.4854634726 | 1.1705731193 | 3.826196493 | ns |
| CD164    | -0.0304889  | 0.011745166  | -4.70918443 | 2.5088341967 | 1.1778732026 | 3.818270913 | ns |
| PRDX3    | -0.07832132 | 0.01579031   | -4.70919929 | 2.5090312742 | 1.1778732026 | 3.826320776 | ns |
| SLMAP    | -0.08650854 | 0.053210249  | -4.70353793 | 2.5790217230 | 1.2087870676 | 3.789572758 | ns |
| ASAH2    | -0.05981804 | -0.07316103  | -4.69142394 | 2.7366203101 | 1.2805979656 | 3.738537064 | ns |
| C1QA     | -0.02497419 | 9.8688376300 | -4.6857062  | 2.8137144682 | 1.3145673995 | 3.705963622 | ns |
| CD55     | -0.02814473 | -0.00149866  | -4.67991352 | 2.8955488365 | 1.3506393934 | 3.701175276 | ns |
| GLO1     | -0.06447385 | -0.01448294  | -4.67291194 | 2.9952888543 | 1.3949351602 | 3.657689427 | ns |
| ALPP     | -0.12218479 | -0.01356746  | -4.66548097 | 3.1050383393 | 1.4437439412 | 3.617353135 | ns |
| GRPEL1   | -0.0649039  | 0.019964552  | -4.66384291 | 3.1298349440 | 1.4529599422 | 3.609764243 | ns |
| MNDA     | -0.10894993 | 0.086793132  | -4.65182508 | 3.3176371366 | 1.5376984823 | 3.553898657 | ns |
| POF1B    | -0.04424453 | 0.042908855  | -4.6510623  | 3.3304193144 | 1.5411766082 | 3.558205788 | ns |
| MANSC1   | -0.02845087 | -0.00295025  | -4.64915449 | 3.3605867792 | 1.5526761701 | 3.537976874 | ns |
| RNASEH2A | -0.05062621 | 0.083288805  | -4.64751019 | 3.3872836316 | 1.5625384209 | 3.527625267 | ns |
| IRAG2    | -0.0963371  | 0.145537998  | -4.64495332 | 3.4302968482 | 1.5784704894 | 3.528333029 | ns |
| NOTCH3   | 0.036601525 | 0.005703887  | 4.644762689 | 3.4326327425 | 1.5784704894 | 3.515429796 | ns |
| EEF1D    | -0.09483144 | 0.01657469   | -4.6433157  | 3.4567799896 | 1.5869889858 | 3.509061009 | ns |
| LRIG3    | -0.0279259  | 0.005890878  | -4.64305884 | 3.4620273424 | 1.5869889858 | 3.522765366 | ns |

|          |             |             |             |              |              |             |    |
|----------|-------------|-------------|-------------|--------------|--------------|-------------|----|
| STX8     | -0.05325463 | 0.031013476 | -4.64245746 | 3.4714202153 | 1.5888004747 | 3.508693686 | ns |
| CTHRC1   | -0.02814044 | -0.02702126 | -4.63915222 | 3.5270583545 | 1.6117387160 | 3.490264838 | ns |
| PDZD2    | -0.06156459 | 0.09565729  | -4.63823762 | 3.5435423366 | 1.6145599325 | 3.498445437 | ns |
| CRYBB1   | -0.06609161 | 0.013665339 | -4.63814279 | 3.5442908107 | 1.6145599325 | 3.485216262 | ns |
| CASC3    | -0.04221814 | 0.029887722 | -4.63696866 | 3.5651627069 | 1.6215381782 | 3.49179251  | ns |
| CEACAM6  | -0.039242   | -0.00209125 | -4.63530069 | 3.5932806443 | 1.6317853004 | 3.472524511 | ns |
| BCAN     | 0.037553923 | 0.042684075 | 4.634108923 | 3.6144209501 | 1.6388368283 | 3.473116838 | ns |
| GALNT3   | -0.04598399 | 0.001683694 | -4.62833039 | 3.7169179828 | 1.6802073106 | 3.451373193 | ns |
| CCL14    | -0.04268    | -0.02449548 | -4.62830252 | 3.7171709681 | 1.6802073106 | 3.447756095 | ns |
| EDN1     | -0.02849628 | -0.02383583 | -4.62094396 | 3.8516180873 | 1.7382882249 | 3.418116932 | ns |
| BAP18    | -0.06937305 | 0.013947613 | -4.61893573 | 3.8881547942 | 1.7520697529 | 3.396960038 | ns |
| TCOF1    | -0.03054013 | -0.00607701 | -4.61708162 | 3.9230186196 | 1.7650561431 | 3.388407571 | ns |
| GZMA     | -0.03719079 | -0.01291418 | -4.61271352 | 4.0061936989 | 1.7997054770 | 3.367538761 | ns |
| IQGAP2   | -0.05893394 | 0.000275428 | -4.60682428 | 4.1216369768 | 1.8487219619 | 3.347262879 | ns |
| HSPA2    | -0.03382983 | 0.008452284 | -4.60323797 | 4.1928521803 | 1.8777804243 | 3.325913069 | ns |
| THPO     | -0.04087355 | -5.06E-05   | -4.59848253 | 4.2904151490 | 1.9185317358 | 3.315038751 | ns |
| TXNDC5   | -0.073201   | 0.024704223 | -4.58642103 | 4.5443660570 | 2.0289830102 | 3.247433299 | ns |
| IL7R     | 0.056948464 | 0.016943953 | 4.585654995 | 4.5613569607 | 2.0334598970 | 3.24806785  | ns |
| LRRC59   | -0.0462083  | 0.06827152  | -4.58217624 | 4.6375356905 | 2.0642689354 | 3.228930877 | ns |
| IGF2R    | -0.02523157 | -0.01476592 | -4.57874904 | 4.7143390182 | 2.0952617859 | 3.216636558 | ns |
| IFNGR1   | -0.02129289 | -0.00138398 | -4.57753876 | 4.7415403302 | 2.1041485963 | 3.210425198 | ns |
| PLXDC2   | 0.026169919 | 0.012825755 | 4.568883309 | 4.9411146900 | 2.1893861752 | 3.168562523 | ns |
| HEPACAM2 | 0.041591922 | 0.026025487 | 4.568533069 | 4.9493659484 | 2.1897194802 | 3.166973066 | ns |
| PSIP1    | -0.06755458 | 0.035757826 | -4.55939671 | 5.1697308228 | 2.2837540095 | 3.129118304 | ns |
| GP1BA    | -0.03437869 | 0.007094555 | -4.55830817 | 5.1969232430 | 2.2922984697 | 3.128728926 | ns |
| TNFAIP2  | -0.04716745 | 0.023714261 | -4.55543072 | 5.2677968616 | 2.3200553296 | 3.108526098 | ns |
| SLITRK2  | -0.04185515 | -0.01402865 | -4.54531408 | 5.5267608488 | 2.4304430239 | 3.060347325 | ns |
| SRPK2    | -0.08846524 | 0.120764505 | -4.53727317 | 5.7418588037 | 2.5212372491 | 3.029169535 | ns |
| NPY      | -0.06936682 | -0.09276635 | -4.53676542 | 5.7551832676 | 2.5232935647 | 3.02178529  | ns |
| C5       | -0.01478654 | -0.00710707 | -4.53150638 | 5.9002401614 | 2.5830136838 | 2.999546305 | ns |
| AHNAK2   | -0.02889281 | 0.007986883 | -4.5274017  | 6.0170543636 | 2.6302093924 | 2.993176665 | ns |
| LCP1     | -0.04731837 | 0.058434104 | -4.52598235 | 6.0563246341 | 2.6434182259 | 2.975126587 | ns |
| SEMA4D   | -0.03129375 | -0.00860303 | -4.52084983 | 6.2047809658 | 2.7041731970 | 2.950833782 | ns |
| FGFBP3   | -0.03583903 | -0.01857842 | -4.51588312 | 6.3518439047 | 2.7641407156 | 2.929419229 | ns |
| ERMAP    | -0.04421839 | -0.01702093 | -4.5144795  | 6.3954497253 | 2.7789751782 | 2.936593472 | ns |
| DBI      | -0.08487203 | -0.00851293 | -4.5114214  | 6.4874476954 | 2.8147618530 | 2.915067235 | ns |
| MSTN     | -0.05458548 | 0.014857572 | -4.50790032 | 6.5965749510 | 2.8578633318 | 2.905426683 | ns |
| DTX3     | -0.02418087 | -0.02128341 | -4.5074641  | 6.6093770418 | 2.8591675499 | 2.897525033 | ns |
| PPP1R12A | -0.10113842 | 0.033457035 | -4.49238419 | 7.0941445267 | 3.0643346180 | 2.826222803 | ns |
| MTUS1    | -0.05365815 | 0.001213783 | -4.46452105 | 8.0823124957 | 3.4860195698 | 2.707473471 | ns |
| THBS4    | -0.04776539 | -0.02449886 | -4.45736752 | 8.3562258459 | 3.5988465295 | 2.674509643 | ns |
| SCARF1   | -0.04341479 | -0.00530759 | -4.45660981 | 8.3849260910 | 3.6058886871 | 2.66490931  | ns |
| AMY2A    | 0.04988182  | 0.014897039 | 4.452746936 | 8.5408179725 | 3.6675277176 | 2.674897071 | ns |
| EIF4G1   | -0.10502992 | -0.09664997 | -4.44328019 | 8.9210399104 | 3.8251742347 | 2.605439631 | ns |
| DNM3     | -0.05288323 | 0.052783543 | -4.4415619  | 8.9925337926 | 3.8501757587 | 2.597911404 | ns |
| CST1     | 0.098334704 | 0.048081719 | 4.425305406 | 9.7060205942 | 4.1494094167 | 2.588242375 | ns |
| NIT2     | -0.07216714 | -0.04011081 | -4.4247878  | 9.7198494556 | 4.1494094167 | 2.526124329 | ns |
| VNN1     | -0.07112223 | -0.10123829 | -4.42246722 | 9.8245255675 | 4.1879729426 | 2.515690831 | ns |
| SPINT1   | -0.02455643 | -0.01325497 | -4.41989949 | 9.9426515063 | 4.2321490377 | 2.508528584 | ns |
| MEGF9    | -0.02155669 | -0.00403363 | -4.40962856 | 1.0424748072 | 4.4308972885 | 2.459977789 | ns |
| KLRB1    | -0.03753939 | 0.003513487 | -4.40837409 | 1.0484839091 | 4.4499607774 | 2.451967959 | ns |
| HNRNPUL1 | -0.04824587 | 0.024157675 | -4.4065124  | 1.0575244599 | 4.4818162889 | 2.44387165  | ns |
| CBS      | -0.04778386 | 0.053951592 | -4.40210554 | 1.0794242476 | 4.5679982655 | 2.437565079 | ns |
| SLAMF6   | -0.03815148 | -0.01333314 | -4.39541888 | 1.1131684751 | 4.7039825576 | 2.408789442 | ns |
| JAM3     | -0.047248   | 0.039494943 | -4.3911585  | 1.1351269816 | 4.7898421769 | 2.3889932   | ns |
| VSIG2    | -0.05123616 | 0.014193269 | -4.38736795 | 1.1549052463 | 4.8662674159 | 2.361965063 | ns |
| EIF2S2   | -0.04052045 | 0.058394612 | -4.38197462 | 1.1840301004 | 4.9817981172 | 2.349746858 | ns |
| ABL1     | -0.07128284 | 0.054459085 | -4.37711948 | 1.2105535096 | 5.0860665443 | 2.322371393 | ns |
| DTYMK    | -0.06612344 | -0.01380721 | -4.37302325 | 1.2333721448 | 5.1744923317 | 2.298632274 | ns |
| DNER     | 0.026768311 | 0.008813408 | 4.372448623 | 1.2367175114 | 5.1810834051 | 2.302042703 | ns |
| TP53I3   | -0.05092903 | -0.00374249 | -4.36744165 | 1.2656477263 | 5.2946867636 | 2.296599222 | ns |
| ALDH3A1  | -0.06451173 | 0.035957889 | -4.36594056 | 1.2740688139 | 5.3173418590 | 2.272386384 | ns |
| ADA2     | -0.04175806 | -0.01800107 | -4.36584522 | 1.2747052401 | 5.3173418590 | 2.277037259 | ns |
| PDCD5    | -0.06105168 | -0.00980959 | -4.36547834 | 1.2766606331 | 5.3179016388 | 2.265044688 | ns |
| MSMB     | -0.07152411 | -0.09660219 | -4.35850989 | 1.3180869092 | 5.4826407049 | 2.243283585 | ns |
| KLK8     | -0.03556234 | -0.02051705 | -4.35488724 | 1.3402293697 | 5.5620602405 | 2.236535941 | ns |

|            |             |             |             |              |              |             |    |
|------------|-------------|-------------|-------------|--------------|--------------|-------------|----|
| TFF1       | -0.07394644 | 0.023579233 | -4.35472898 | 1.3409898662 | 5.5620602405 | 2.225475149 | ns |
| BAG4       | -0.04654904 | 0.03790814  | -4.35019866 | 1.3691041628 | 5.6706158232 | 2.213399721 | ns |
| RSPO1      | -0.03499856 | -0.0177006  | -4.34921842 | 1.3750911378 | 5.6787902458 | 2.202099969 | ns |
| TNFRSF21   | -0.02607171 | -0.00547418 | -4.34901326 | 1.3762406122 | 5.6787902458 | 2.193771848 | ns |
| RBKS       | -0.05218776 | 0.009818999 | -4.34895244 | 1.3769121554 | 5.6787902458 | 2.208392698 | ns |
| KLRK1      | -0.04260847 | -0.05432116 | -4.34212965 | 1.4200360771 | 5.8483855365 | 2.164940704 | ns |
| SCRIB      | -0.08715917 | 0.181398674 | -4.33927753 | 1.4388209309 | 5.9174043919 | 2.164815814 | ns |
| CD7        | -0.04012871 | -0.00790243 | -4.33777549 | 1.4487196376 | 5.9497346582 | 2.160687699 | ns |
| BECN1      | -0.05854549 | 0.047563299 | -4.3333499  | 1.4780804680 | 6.0617906836 | 2.139284641 | ns |
| GPRC5C     | -0.05159269 | 0.065085458 | -4.33135448 | 1.4912935848 | 6.1074014974 | 2.119386782 | ns |
| CCL5       | -0.1048714  | -0.11593381 | -4.32890333 | 1.5080262577 | 6.1672782531 | 2.112437548 | ns |
| SERPINH1   | -0.12193834 | -0.02301683 | -4.32772872 | 1.5161320077 | 6.1917558918 | 2.110137065 | ns |
| DNAJA2     | -0.08407712 | -0.04836276 | -4.32579265 | 1.5293690972 | 6.2370918493 | 2.095665711 | ns |
| FYB1       | -0.09437015 | -0.03554146 | -4.31970927 | 1.5721750950 | 6.4027214472 | 2.07264259  | ns |
| OTUD7B     | -0.06008686 | 0.023676332 | -4.31031371 | 1.6402738585 | 6.6707516253 | 2.027342021 | ns |
| CLEC1B     | -0.09729566 | -0.0024357  | -4.30883279 | 1.6512912010 | 6.7062173951 | 2.020969319 | ns |
| CLUL1      | 0.045911252 | 0.035076086 | 4.302239438 | 1.7013039872 | 6.8997328373 | 1.999837082 | ns |
| DYNLT1     | -0.07470789 | 0.141053321 | -4.2995093  | 1.7224939011 | 6.9759808478 | 1.994200002 | ns |
| PPP1R9B    | -0.09670721 | 0.021549955 | -4.29003428 | 1.7972577849 | 7.2686879946 | 1.940649077 | ns |
| ENO3       | -0.05612934 | 0.053892122 | -4.28457563 | 1.8422329888 | 7.4402770779 | 1.930528547 | ns |
| ALCAM      | -0.01861097 | -0.00660483 | -4.28266166 | 1.8578173053 | 7.4928543253 | 1.909804069 | ns |
| SMAD1      | -0.08276106 | 0.030859878 | -4.28138736 | 1.8688258047 | 7.5268570343 | 1.917407318 | ns |
| UBE2L6     | -0.05803527 | 0.006833735 | -4.28031099 | 1.8775430777 | 7.5515506710 | 1.900120343 | ns |
| BLNK       | -0.03542563 | 0.001154452 | -4.27596271 | 1.9148716834 | 7.6910939691 | 1.895370516 | ns |
| ADAM9      | -0.02656542 | -0.00934361 | -4.26130248 | 2.0444210310 | 8.2001502894 | 1.820459282 | ns |
| NRP1       | 0.027081973 | -0.00772109 | 4.259883768 | 2.0574851671 | 8.2412300249 | 1.816746581 | ns |
| ERBB2      | -0.02423934 | -0.025448   | -4.25426616 | 2.1097169700 | 8.4388678801 | 1.791722614 | ns |
| SLAMF8     | -0.05201354 | -0.09001592 | -4.2514175  | 2.1370315574 | 8.5364324867 | 1.790399905 | ns |
| LONP1      | -0.07958494 | 0.009066422 | -4.23507241 | 2.2983296032 | 9.1682000565 | 1.72106286  | ns |
| RGCC       | -0.07041826 | -0.03088473 | -4.23466918 | 2.3020627120 | 9.1705636004 | 1.706251145 | ns |
| GGT1       | -0.04815616 | 0.002610699 | -4.23238686 | 2.3256948423 | 9.2520830242 | 1.701814361 | ns |
| BNIP3L     | -0.04089565 | 0.024587305 | -4.2305935  | 2.3445606826 | 9.3144451611 | 1.70369572  | ns |
| MPHOSPH8   | -0.07261009 | 0.034927246 | -4.22671902 | 2.3852018670 | 9.4630291462 | 1.685702025 | ns |
| TCN1       | -0.03095257 | -0.00375252 | -4.22468841 | 2.4067048827 | 9.5353843386 | 1.675455609 | ns |
| EPS8L2     | -0.029043   | -0.01011755 | -4.2196541  | 2.4607047702 | 9.7361218550 | 1.643484616 | ns |
| CEBPB      | -0.03666118 | 0.014006497 | -4.2180386  | 2.4787688665 | 9.7943235321 | 1.649294094 | ns |
| TNIP1      | -0.08297861 | 0.017423636 | -4.21013712 | 2.5665512300 | 0.000101275  | 1.604198033 | ns |
| CD36       | -0.04126921 | 0.029869116 | -4.20528203 | 2.6226633947 | 0.000103349  | 1.597646777 | ns |
| GLB1       | -0.04023945 | -0.00268415 | -4.20042306 | 2.6792854442 | 0.000105438  | 1.570229444 | ns |
| VWF        | -0.07302773 | -0.04195729 | -4.19777384 | 2.7105382911 | 0.000106525  | 1.552195861 | ns |
| MAP2       | -0.04151001 | 0.062906109 | -4.1834012  | 2.8876071737 | 0.000113331  | 1.492719276 | ns |
| ESAM       | -0.02942576 | -0.00190025 | -4.18130726 | 2.9142913984 | 0.000114225  | 1.483653994 | ns |
| CD6        | -0.05220519 | -0.03912866 | -4.17494163 | 2.9968971981 | 0.000117305  | 1.457249845 | ns |
| PSMG3      | -0.0510186  | 0.0163393   | -4.17149484 | 3.0427242170 | 0.000118939  | 1.446962314 | ns |
| MFGE8      | -0.04204712 | -0.00135325 | -4.16631364 | 3.1125671738 | 0.000121507  | 1.425183928 | ns |
| CLIP2      | -0.11147812 | -0.05597876 | -4.16317749 | 3.1556249371 | 0.000123023  | 1.412526618 | ns |
| S100A12    | -0.0733918  | -0.022183   | -4.16083379 | 3.1883687181 | 0.000124134  | 1.408468958 | ns |
| MB         | -0.04978336 | 0.020739999 | -4.1575139  | 3.2345807027 | 0.000125765  | 1.385089373 | ns |
| CEP20      | -0.07165838 | 0.010310323 | -4.1555707  | 3.2627097729 | 0.00012669   | 1.390191653 | ns |
| CYB5R2     | -0.04997517 | 0.014019797 | -4.15401401 | 3.2846779649 | 0.000127374  | 1.377379859 | ns |
| FUS        | -0.03910658 | 0.009529481 | -4.150008   | 3.3429578542 | 0.000129462  | 1.36777411  | ns |
| HSPA1A     | -0.07018152 | 0.024582347 | -4.14535415 | 3.4110536234 | 0.000131924  | 1.338487459 | ns |
| CTSL       | -0.02238587 | -0.0219277  | -4.14099885 | 3.4765073525 | 0.000134278  | 1.323066334 | ns |
| ATOX1      | -0.06977775 | -0.06073943 | -4.1304752  | 3.6392045101 | 0.000140376  | 1.276115164 | ns |
| MME        | -0.07662283 | 0.083099284 | -4.12450838 | 3.7349072458 | 0.000143878  | 1.255639331 | ns |
| IL32       | 0.039541127 | 0.009635475 | 4.123198582 | 3.7561345671 | 0.000144505  | 1.247962122 | ns |
| CTBS       | -0.02426914 | -0.02082867 | -4.11429176 | 3.9040977482 | 0.00015      | 1.215923499 | ns |
| RPE        | -0.06540159 | 0.079024553 | -4.11344175 | 3.9184646867 | 0.000150354  | 1.211677204 | ns |
| CNST       | -0.10370584 | -0.05921551 | -4.11089574 | 3.9618245290 | 0.000151818  | 1.199671265 | ns |
| SERPINA5   | -0.02907401 | 0.018690177 | -4.11056136 | 3.9676549769 | 0.000151842  | 1.200139778 | ns |
| GADD45GIP1 | -0.0467099  | 0.036425935 | -4.10929272 | 3.9897089633 | 0.000152486  | 1.19976861  | ns |
| MEP1A      | -0.06302296 | 0.00702397  | -4.1048203  | 4.0670646819 | 0.00015524   | 1.170122784 | ns |
| NFATC3     | -0.05729622 | 0.109977462 | -4.10422878 | 4.0779649711 | 0.000155404  | 1.178417095 | ns |
| KRT5       | -0.04624685 | 0.027792833 | -4.10380542 | 4.0854839916 | 0.000155404  | 1.176980538 | ns |
| HSDL2      | -0.04249727 | 0.00206624  | -4.10370024 | 4.0873264294 | 0.000155404  | 1.17695465  | ns |
| TNFRSF13C  | -0.04021416 | -0.02108308 | -4.10143928 | 4.1273917829 | 0.000156723  | 1.167047584 | ns |



|             |             |             |             |              |             |             |    |
|-------------|-------------|-------------|-------------|--------------|-------------|-------------|----|
| SNX15       | -0.04928186 | 0.000995616 | -4.09218502 | 4.2954120529 | 0.000162891 | 1.129291074 | ns |
| MYDGF       | -0.08983487 | -0.03194386 | -4.08987987 | 4.3377824873 | 0.000164284 | 1.108298062 | ns |
| CLPP        | -0.09131208 | -0.01695133 | -4.08280765 | 4.4722012683 | 0.000169156 | 1.087357036 | ns |
| FABP6       | 0.051530682 | 0.047857735 | 4.081580154 | 4.4961200131 | 0.00016984  | 1.086766275 | ns |
| CRACR2A     | -0.08260263 | 0.108605813 | -4.08027135 | 4.5215203097 | 0.000170579 | 1.082165318 | ns |
| SPRR3       | -0.05884437 | 0.035261931 | -4.07694206 | 4.5859573157 | 0.000172787 | 1.055852875 | ns |
| SNAP29      | -0.08628893 | -0.03306719 | -4.07399334 | 4.6444746067 | 0.000174766 | 1.045906681 | ns |
| F10         | -0.02308901 | -0.01711836 | -4.07318379 | 4.6605727770 | 0.000175146 | 1.041655998 | ns |
| NMNAT1      | -0.07131303 | 0.037024758 | -4.07157668 | 4.6931346751 | 0.000176143 | 1.040801384 | ns |
| IL12RB1     | -0.03466496 | -0.02995799 | -4.06198523 | 4.8902857954 | 0.000183307 | 1.007066257 | ns |
| FNTA        | -0.03134289 | 0.02094789  | -4.06145949 | 4.9007527027 | 0.000183464 | 0.994139729 | ns |
| ESM1        | 0.033347202 | 0.024057836 | 4.053426294 | 5.0722141331 | 0.00018964  | 0.966661989 | ns |
| ELN         | -0.02943248 | -0.04060549 | -4.05020612 | 5.1421793116 | 0.00019201  | 0.94785773  | ns |
| C9          | -0.04527603 | -0.06124499 | -4.04683132 | 5.2167847044 | 0.000194547 | 0.935350422 | ns |
| TBC1D5      | -0.07509604 | 0.097886446 | -4.0406484  | 5.3563357968 | 0.000199496 | 0.913175745 | ns |
| CALCOCO2    | -0.0677493  | 0.032612566 | -4.02443126 | 5.7392098929 | 0.000213484 | 0.856918574 | ns |
| S100P       | -0.05035817 | 0.033779393 | -4.01866934 | 5.8812250021 | 0.000218488 | 0.833642515 | ns |
| PLXNA4      | -0.07708849 | -0.03786337 | -4.01828102 | 5.8903962521 | 0.000218551 | 0.823626985 | ns |
| PALM3       | -0.06643577 | 0.152686517 | -4.01571027 | 5.9554982432 | 0.000220686 | 0.822945947 | ns |
| AK2         | -0.09330098 | -0.03490324 | -4.00825721 | 6.1454659490 | 0.000227437 | 0.779960656 | ns |
| CDH2        | -0.03304716 | -0.04225964 | -4.00747967 | 6.1660658200 | 0.00022791  | 0.782604538 | ns |
| AMY1A_AMY1B | 0.043938127 | 0.02286981  | 4.00303612  | 6.2845927755 | 0.000231998 | 0.788109089 | ns |
| OMG         | 0.063072233 | 0.052601493 | 4.001379937 | 6.3270732992 | 0.000233271 | 0.758618102 | ns |
| CLGN        | -0.03791374 | 0.023910683 | -3.999261   | 6.3842852998 | 0.000235083 | 0.756602129 | ns |
| VTI1A       | -0.05152714 | 0.054787506 | -3.994102   | 6.5246719727 | 0.00023995  | 0.735324748 | ns |
| IL1B        | -0.05215619 | 0.051392367 | -3.98994863 | 6.6401227402 | 0.000243889 | 0.721537133 | ns |
| APOA2       | 0.041676347 | -0.00634954 | 3.988635769 | 6.6759957438 | 0.000244898 | 0.703029455 | ns |
| S100A13     | -0.03037768 | -0.01072207 | -3.98151153 | 6.8800424726 | 0.000252067 | 0.687722817 | ns |
| CD70        | -0.04022652 | -0.03548506 | -3.98021687 | 6.9169288705 | 0.000253101 | 0.672375885 | ns |
| STK11       | -0.06732931 | -0.00298081 | -3.97979756 | 6.9297135962 | 0.000253251 | 0.679201639 | ns |
| CD2AP       | -0.059641   | 0.014470425 | -3.9722818  | 7.1513339675 | 0.000261024 | 0.643073554 | ns |
| MYO9B       | -0.06208609 | 0.098124964 | -3.96731029 | 7.3023968294 | 0.000266205 | 0.629464915 | ns |
| P4HB        | -0.03611585 | -0.00640458 | -3.96277409 | 7.4419296307 | 0.000270953 | 0.604402326 | ns |
| PSG1        | 0.105718791 | -0.18310122 | 3.961388007 | 7.4853781896 | 0.000272196 | 0.601092861 | ns |
| ITGAM       | 0.028802696 | 0.011571648 | 3.960929583 | 7.4995315217 | 0.000272371 | 0.595961005 | ns |
| RTN4IP1     | -0.07821338 | -0.01789122 | -3.96011295 | 7.5248621932 | 0.000272718 | 0.588491042 | ns |
| SEPTIN8     | -0.02787074 | -0.00304184 | -3.96002337 | 7.5277691440 | 0.000272718 | 0.589498773 | ns |
| ZBP1        | -0.03448792 | 0.042093612 | -3.95710933 | 7.6210747964 | 0.000275756 | 0.591496968 | ns |
| DAAM1       | -0.07170842 | 0.022401802 | -3.9548791  | 7.6921860608 | 0.000277985 | 0.580449103 | ns |
| PROS1       | -0.02136034 | -0.01725959 | -3.95095893 | 7.8183648049 | 0.000282196 | 0.553305744 | ns |
| CXADR       | -0.04682052 | 0.043997185 | -3.95038115 | 7.8375828363 | 0.00028254  | 0.554825496 | ns |
| PRG3        | -0.04227487 | 0.011750375 | -3.94667423 | 7.9594266346 | 0.000286579 | 0.5369391   | ns |
| IL22        | -0.0563277  | 0.027189357 | -3.94332741 | 8.0713372966 | 0.00029025  | 0.524344713 | ns |
| CPQ         | -0.03010505 | -0.01981516 | -3.93671658 | 8.2966072236 | 0.000297984 | 0.498686764 | ns |
| LRRFIP1     | -0.04254116 | 0.057675848 | -3.93329731 | 8.4154623053 | 0.000301881 | 0.485093737 | ns |
| PLG         | -0.01904678 | -0.0213721  | -3.93191928 | 8.4647775111 | 0.000303278 | 0.491539027 | ns |
| LRG1        | -0.02162856 | -0.00069428 | -3.93028854 | 8.5212600918 | 0.000304927 | 0.472367351 | ns |
| ODAM        | 0.049308067 | 0.080863638 | 3.929775602 | 8.5405456033 | 0.000305243 | 0.48314682  | ns |
| NBN         | -0.04707028 | 0.041310369 | -3.92879847 | 8.5751249492 | 0.000306105 | 0.478406982 | ns |
| DNAJC21     | -0.03349181 | 0.045629235 | -3.92655407 | 8.6544424401 | 0.000308559 | 0.457868565 | ns |
| GCG         | -0.1154127  | 0.020933821 | -3.92600123 | 8.6754659747 | 0.000308931 | 0.468646723 | ns |
| IL13RA1     | -0.0205836  | -0.00252625 | -3.92164357 | 8.8331567310 | 0.000314163 | 0.445531611 | ns |
| CXCL6       | -0.07021648 | -0.01521787 | -3.91982181 | 8.8994662036 | 0.000316137 | 0.430691042 | ns |
| CLEC5A      | -0.02571092 | -0.01994965 | -3.91799889 | 8.9676763264 | 0.000318173 | 0.432346928 | ns |
| TCL1A       | -0.09140668 | -0.04303184 | -3.91570965 | 9.0530990183 | 0.000320814 | 0.42323603  | ns |
| TARBP2      | -0.07366391 | 0.019241948 | -3.91113592 | 9.2265949886 | 0.000326566 | 0.40991388  | ns |
| SNCA        | -0.09831985 | -0.03125633 | -3.9083397  | 9.3336993199 | 0.000329956 | 0.398662076 | ns |
| LAT         | -0.07028256 | -0.11615883 | -3.90211306 | 9.5758775734 | 0.000338108 | 0.361869391 | ns |
| WDR46       | -0.03207979 | 0.006255983 | -3.89737305 | 9.7652184789 | 0.000344377 | 0.345329158 | ns |
| PINLYP      | -0.05744951 | -0.06601671 | -3.89604586 | 9.8196337600 | 0.000345879 | 0.350999798 | ns |
| FCRL6       | -0.06180697 | -0.06208882 | -3.89265332 | 9.9573253907 | 0.000350306 | 0.329888559 | ns |
| ADGRF5      | -0.0238331  | -0.02799286 | -3.88828758 | 0.000101375  | 0.000356216 | 0.309243269 | ns |
| PPP3R1      | -0.03814352 | -0.02268153 | -3.8835836  | 0.000103362  | 0.00036276  | 0.29786507  | ns |
| TNFRSF11B   | -0.02587806 | -0.02346092 | -3.88001791 | 0.000104886  | 0.000367457 | 0.283220468 | ns |
| TSC22D1     | -0.05695795 | 0.051698312 | -3.87985214 | 0.000104952  | 0.000367457 | 0.275855735 | ns |
| L3HYPDH     | -0.07524584 | 0.011406265 | -3.87887085 | 0.000105376  | 0.000368502 | 0.27290323  | ns |

|          |             |             |             |             |             |             |    |
|----------|-------------|-------------|-------------|-------------|-------------|-------------|----|
| ATP6AP2  | -0.03709768 | 0.028756029 | -3.878513   | 0.000105544 | 0.000368647 | 0.284539569 | ns |
| ECHDC3   | -0.06089729 | 0.055146059 | -3.86710158 | 0.000110587 | 0.000385799 | 0.227608149 | ns |
| CXCL9    | -0.05927844 | 0.030408137 | -3.86660115 | 0.000110816 | 0.000386136 | 0.2283882   | ns |
| CC2D1A   | -0.06895287 | 0.043907301 | -3.86570174 | 0.000111229 | 0.000387114 | 0.229022282 | ns |
| REG4     | -0.04180777 | -0.02641816 | -3.86302355 | 0.000112452 | 0.000390905 | 0.216597919 | ns |
| CD63     | -0.04697497 | -0.05073654 | -3.85648368 | 0.000115503 | 0.000401032 | 0.194510997 | ns |
| AZI2     | -0.04746582 | 0.067031324 | -3.85550243 | 0.000115958 | 0.000402134 | 0.182270794 | ns |
| LGALS3   | -0.02679394 | -0.02689129 | -3.85408837 | 0.000116635 | 0.000404003 | 0.182405263 | ns |
| KIF22    | -0.10263993 | -0.16132158 | -3.85376549 | 0.000116799 | 0.00040409  | 0.189890749 | ns |
| CA9      | 0.039154271 | 0.034974485 | 3.853438076 | 0.00011694  | 0.000404099 | 0.173659346 | ns |
| WWP2     | -0.04928625 | 0.033169945 | -3.84947714 | 0.000118853 | 0.000410224 | 0.166834066 | ns |
| ASAH1    | -0.03938126 | -0.00626588 | -3.84865473 | 0.00011925  | 0.00041111  | 0.162081344 | ns |
| CLSTN2   | 0.034727188 | 0.021206573 | 3.847503305 | 0.000119805 | 0.000412536 | 0.151597499 | ns |
| AMOTL2   | -0.04114507 | 0.101791668 | -3.84154256 | 0.000122754 | 0.000422193 | 0.132502115 | ns |
| MOCS2    | -0.05615562 | 0.023097775 | -3.84075408 | 0.000123157 | 0.000423079 | 0.138490531 | ns |
| APLP1    | 0.045475417 | 0.060587433 | 3.839538103 | 0.000123762 | 0.00042466  | 0.127905109 | ns |
| NCAM1    | 0.027486678 | 0.017233854 | 3.835687202 | 0.000125714 | 0.000430852 | 0.112020254 | ns |
| PTPRC    | -0.0191486  | -0.00194468 | -3.83448019 | 0.000126328 | 0.000432449 | 0.103195479 | ns |
| NPTX1    | 0.035689121 | 0.025436673 | 3.827942964 | 0.000129731 | 0.000443577 | 0.081346232 | ns |
| TRIM58   | -0.07253421 | 0.022676065 | -3.82738826 | 0.000130021 | 0.000444047 | 0.076726281 | ns |
| LYPD3    | 0.029785026 | 0.004749544 | 3.825483979 | 0.000131032 | 0.00044698  | 0.073310702 | ns |
| OMD      | 0.039209576 | -0.00650596 | 3.813476375 | 0.00013756  | 0.000468698 | 0.025676174 | ns |
| SIRPA    | -0.05099563 | -0.09106742 | -3.8100717  | 0.000139469 | 0.000474649 | 0.014979416 | ns |
| CPPED1   | -0.06072406 | -0.01339715 | -3.80907194 | 0.000140027 | 0.000475995 | 0.00542031  | ns |
| PTN      | -0.04297601 | -0.04440961 | -3.80615017 | 0.000141705 | 0.000480855 | 0.007579602 | ns |
| BGN      | 0.105231141 | 0.192235778 | 3.80601167  | 0.000141786 | 0.000480855 | 0.008329636 | ns |
| TSPAN1   | -0.04921728 | 0.154218891 | -3.80462036 | 0.000142583 | 0.000482996 | 0.001795581 | ns |
| PBLD     | -0.04555641 | 0.022806931 | -3.80130947 | 0.0001445   | 0.000488923 | -0.01086456 | ns |
| SLIT2    | -0.04617484 | -0.00611232 | -3.79994243 | 0.000145299 | 0.000491057 | -0.01602674 | ns |
| CLC      | -0.05880545 | 0.045408347 | -3.79832634 | 0.00014624  | 0.000493664 | -0.02848003 | ns |
| BCL2     | -0.04390653 | 0.027505554 | -3.79780132 | 0.000146544 | 0.000494119 | -0.03529634 | ns |
| CIT      | -0.03887251 | 0.040308686 | -3.78632268 | 0.000153485 | 0.000516926 | -0.06694817 | ns |
| RNF41    | -0.06037518 | 0.040599887 | -3.7853045  | 0.000154117 | 0.000518457 | -0.07031894 | ns |
| ZNRD2    | -0.05598931 | 0.042293767 | -3.78485221 | 0.000154381 | 0.000518747 | -0.08408271 | ns |
| AP3B1    | -0.06391774 | 0.032140695 | -3.78353865 | 0.000155197 | 0.000520892 | -0.08902231 | ns |
| LAT2     | -0.11210848 | 0.02581102  | -3.77991919 | 0.000157475 | 0.00052793  | -0.09749946 | ns |
| FDX1     | -0.05171329 | 0.029802993 | -3.7792899  | 0.000157884 | 0.000528693 | -0.09251134 | ns |
| ARTN     | -0.04080955 | 0.04621528  | -3.77751795 | 0.000159007 | 0.000531844 | -0.10073821 | ns |
| BACH1    | -0.0638538  | 0.030804346 | -3.77494377 | 0.000160647 | 0.000536714 | -0.11852803 | ns |
| YTHDF3   | -0.07407069 | -0.01614724 | -3.76984899 | 0.000163968 | 0.000547186 | -0.1294928  | ns |
| WARS     | -0.03017341 | -0.02033913 | -3.76843712 | 0.000164887 | 0.000549622 | -0.14324207 | ns |
| GRHPR    | -0.05243589 | -0.00937699 | -3.76484729 | 0.000167267 | 0.00055692  | -0.16014449 | ns |
| PGD      | -0.0445196  | -0.00138277 | -3.76364478 | 0.000168073 | 0.000558966 | -0.16464278 | ns |
| FCN2     | -0.03721255 | -0.06413633 | -3.76307484 | 0.000168467 | 0.00055964  | -0.15820137 | ns |
| RECK     | 0.016746978 | 0.005920219 | 3.757021726 | 0.000172595 | 0.000572702 | -0.17675154 | ns |
| CALCB    | -0.03142038 | 0.028331241 | -3.75606034 | 0.000173241 | 0.000574192 | -0.19293466 | ns |
| MECR     | -0.07431108 | -0.01244222 | -3.75431245 | 0.000174471 | 0.000577613 | -0.18686139 | ns |
| PROC     | -0.02237418 | -0.0123426  | -3.74896692 | 0.000178217 | 0.000589347 | -0.21429002 | ns |
| IDO1     | -0.05193988 | 0.01788566  | -3.74628821 | 0.000180139 | 0.000595029 | -0.21676173 | ns |
| LGALS8   | -0.05373451 | 0.045095938 | -3.74196754 | 0.000183244 | 0.0006046   | -0.24635267 | ns |
| TDRKH    | -0.0751791  | 0.085080033 | -3.74117642 | 0.00018384  | 0.000605884 | -0.23618517 | ns |
| IL1RL2   | -0.03411415 | -0.01005191 | -3.74021214 | 0.000184545 | 0.00060752  | -0.2400673  | ns |
| MCFD2    | -0.03816148 | 0.003837824 | -3.72909611 | 0.000192862 | 0.000634185 | -0.2868341  | ns |
| AKR1B1   | -0.06608816 | -0.02913306 | -3.72539775 | 0.000195721 | 0.000642862 | -0.29384482 | ns |
| HEXIM1   | -0.0719064  | -0.00232697 | -3.71977703 | 0.000200109 | 0.000656539 | -0.32395722 | ns |
| SERPINE1 | -0.05940314 | -0.09002708 | -3.71663644 | 0.000202602 | 0.000663971 | -0.33969151 | ns |
| LTA      | -0.03469263 | -0.01785238 | -3.70961846 | 0.000208304 | 0.000681892 | -0.36145648 | ns |
| SYTL4    | -0.05853548 | 0.093125142 | -3.70872834 | 0.00020903  | 0.000683503 | -0.36854207 | ns |
| PFDN2    | -0.04791571 | 0.000587926 | -3.70815394 | 0.000209525 | 0.000684353 | -0.35839617 | ns |
| GDNF     | -0.03233444 | -0.0150574  | -3.70706277 | 0.000210428 | 0.000686537 | -0.36241595 | ns |
| PRKAR2A  | -0.06697275 | -0.04797224 | -3.70513157 | 0.000212017 | 0.000690949 | -0.38091817 | ns |
| MCEMP1   | -0.0730991  | 0.065267171 | -3.70392253 | 0.000213051 | 0.000693544 | -0.37205933 | ns |
| CD160    | -0.03879634 | 0.001850212 | -3.70066696 | 0.000215776 | 0.000701633 | -0.39911832 | ns |
| TACSTD2  | 0.026713824 | 0.012061232 | 3.699151321 | 0.000217165 | 0.000705363 | -0.34900794 | ns |
| LPCAT2   | -0.03517718 | 0.042602369 | -3.69824271 | 0.000217857 | 0.000706824 | -0.40096523 | ns |
| GLOD4    | -0.0313295  | -0.01595977 | -3.69753797 | 0.000218462 | 0.000708    | -0.40329441 | ns |

|           |             |             |             |             |             |             |    |
|-----------|-------------|-------------|-------------|-------------|-------------|-------------|----|
| ATP5IF1   | -0.095632   | -0.08554101 | -3.69457918 | 0.000221013 | 0.000715474 | -0.41786536 | ns |
| AP1G2     | -0.06544459 | 0.03947534  | -3.69138077 | 0.000223807 | 0.000723717 | -0.43137885 | ns |
| RAB27B    | -0.06616649 | -0.14291056 | -3.68920959 | 0.000225722 | 0.000729102 | -0.44029264 | ns |
| GIP       | -0.04124774 | 0.075396273 | -3.68848223 | 0.000226388 | 0.000730447 | -0.43027424 | ns |
| RAB10     | -0.04315909 | 0.033676488 | -3.68525931 | 0.000229249 | 0.00073886  | -0.45476781 | ns |
| PSME2     | -0.03229971 | -0.00070037 | -3.68469944 | 0.000229767 | 0.000739714 | -0.44830562 | ns |
| KRT8      | -0.04863907 | 0.035507696 | -3.67719327 | 0.000236634 | 0.00076098  | -0.47205239 | ns |
| NOS1      | -0.04484848 | -0.01122511 | -3.67665633 | 0.000237132 | 0.000761744 | -0.47395609 | ns |
| LY9       | -0.02471911 | -0.01034892 | -3.67635328 | 0.000237408 | 0.000761792 | -0.47716901 | ns |
| MAVS      | -0.08102374 | 0.080756009 | -3.67430621 | 0.000239325 | 0.0007671   | -0.48166693 | ns |
| CEP170    | -0.06278371 | 0.081483561 | -3.67091512 | 0.000242518 | 0.000776482 | -0.4945036  | ns |
| PREB      | -0.02517379 | 0.001283572 | -3.67015104 | 0.000243242 | 0.000777947 | -0.49800004 | ns |
| TNFAIP8L2 | -0.05011243 | 0.055873011 | -3.66981209 | 0.000243562 | 0.000778119 | -0.4993352  | ns |
| PARK7     | -0.04590923 | -0.00786113 | -3.66917829 | 0.000244154 | 0.000779157 | -0.51005157 | ns |
| DAB2      | -0.09679148 | -0.10293728 | -3.66774768 | 0.000245514 | 0.000782644 | -0.52029971 | ns |
| AMY2B     | 0.042040147 | 0.02244243  | 3.667283457 | 0.000246043 | 0.000783474 | -0.47764792 | ns |
| GCNT1     | -0.02915954 | -0.01039401 | -3.66456008 | 0.000248601 | 0.000790008 | -0.52418465 | ns |
| EIF2AK2   | -0.08746306 | 0.030491877 | -3.66451803 | 0.000248636 | 0.000790008 | -0.52794905 | ns |
| VSTM1     | -0.04213352 | -0.00777882 | -3.66297806 | 0.000250154 | 0.000793967 | -0.52383313 | ns |
| MARCO     | -0.02271081 | -0.03160433 | -3.65885568 | 0.000254195 | 0.000805916 | -0.54522862 | ns |
| NPL       | -0.03556693 | -0.04347188 | -3.65378702 | 0.000259254 | 0.000821064 | -0.56953999 | ns |
| STC2      | -0.02194441 | -0.00342332 | -3.65071148 | 0.000262382 | 0.000830072 | -0.57721711 | ns |
| PRRT3     | -0.02929385 | 0.015882938 | -3.65000296 | 0.000263123 | 0.000831515 | -0.57056419 | ns |
| STXBP1    | -0.06162573 | -0.04055021 | -3.64866004 | 0.000264475 | 0.000834885 | -0.58898432 | ns |
| DRAXIN    | -0.03600238 | 0.000665371 | -3.64719174 | 0.000266004 | 0.000838803 | -0.5865982  | ns |
| TFRC      | -0.03290128 | 0.008120676 | -3.64490947 | 0.000268368 | 0.000845345 | -0.59756937 | ns |
| IL15RA    | -0.02924972 | -0.0277225  | -3.64112118 | 0.00027236  | 0.000856996 | -0.60344808 | ns |
| STX3      | -0.03061723 | 0.064155683 | -3.6395332  | 0.000274021 | 0.000861292 | -0.62115072 | ns |
| CDSN      | -0.03592883 | -0.00954196 | -3.6387344  | 0.000274871 | 0.000863035 | -0.62426885 | ns |
| RP2       | -0.03611658 | 0.025341801 | -3.63601598 | 0.000277796 | 0.000871282 | -0.62772509 | ns |
| ROBO1     | -0.01963037 | -0.00732379 | -3.63044243 | 0.000283856 | 0.000889333 | -0.64933075 | ns |
| F2R       | -0.04919173 | -0.01192922 | -3.62841604 | 0.000286089 | 0.00089537  | -0.65756237 | ns |
| TXLNA     | -0.07619051 | -0.04624047 | -3.62497528 | 0.000289928 | 0.000905871 | -0.66687203 | ns |
| DSCAM     | -0.02737764 | 0.00866266  | -3.62484012 | 0.000290065 | 0.000905871 | -0.67507663 | ns |
| SAMD9L    | -0.06239717 | 0.019324208 | -3.62245663 | 0.00029276  | 0.000913311 | -0.67899741 | ns |
| HNRNPK    | -0.06383232 | 0.051842254 | -3.61761029 | 0.000298312 | 0.000929637 | -0.68584474 | ns |
| BCR       | -0.07738521 | -0.03220914 | -3.61720184 | 0.000298761 | 0.000930044 | -0.69790036 | ns |
| LMNB1     | -0.04672498 | -0.01662526 | -3.61553556 | 0.000300683 | 0.00093503  | -0.70538075 | ns |
| RAB44     | -0.03449036 | 0.038410105 | -3.61143291 | 0.000305475 | 0.000948921 | -0.72148955 | ns |
| MAGED1    | -0.04038765 | 0.037134512 | -3.61012849 | 0.00030704  | 0.00095277  | -0.7139277  | ns |
| EHBP1     | -0.05984191 | 0.041242695 | -3.60720381 | 0.000310488 | 0.000962448 | -0.73761458 | ns |
| SOD2      | -0.03071118 | 0.000823853 | -3.60550954 | 0.000312527 | 0.00096774  | -0.74019335 | ns |
| CR1       | -0.02816125 | -0.00605057 | -3.60461104 | 0.000313607 | 0.000970055 | -0.74356316 | ns |
| CCL26     | -0.07561829 | 0.034622279 | -3.60412593 | 0.000314197 | 0.000970851 | -0.74481917 | ns |
| SKAP2     | -0.08895222 | -0.01939159 | -3.60377336 | 0.000314619 | 0.000971127 | -0.74716842 | ns |
| CDC42BPB  | -0.08229705 | 0.060279564 | -3.60341114 | 0.000315054 | 0.000971444 | -0.75017674 | ns |
| RALY      | -0.03862401 | 0.029304294 | -3.60030294 | 0.000318842 | 0.000982087 | -0.76137457 | ns |
| CGREF1    | -0.03519279 | -0.01338478 | -3.59566494 | 0.000324582 | 0.000998713 | -0.77300316 | ns |
| SERPINA1  | -0.00613119 | -0.00429912 | -3.59456362 | 0.000325965 | 0.001001913 | -0.77407027 | ns |
| BAX       | -0.07478437 | 0.023373501 | -3.59400255 | 0.000326677 | 0.001002774 | -0.77187798 | ns |
| SERPINB1  | -0.07629384 | 0.019040598 | -3.59357459 | 0.000327197 | 0.001002774 | -0.78090851 | ns |
| IPCEF1    | -0.0765666  | -0.05433919 | -3.59351496 | 0.000327275 | 0.001002774 | -0.77884396 | ns |
| FEN1      | -0.05436509 | 0.090077812 | -3.59254728 | 0.000328506 | 0.00100549  | -0.77684168 | ns |
| CCN1      | -0.06467639 | -0.1504574  | -3.59206052 | 0.000329104 | 0.001006266 | -0.78501608 | ns |
| CHMP6     | -0.04420476 | -0.00209713 | -3.59015629 | 0.000331501 | 0.001012535 | -0.79858479 | ns |
| PSAPL1    | -0.0381526  | 0.009602024 | -3.57546684 | 0.000350669 | 0.001069963 | -0.84986161 | ns |
| CD99      | -0.0158141  | -0.0158305  | -3.57497385 | 0.000351337 | 0.00107088  | -0.849143   | ns |
| EPCAM     | 0.083415423 | 0.117250887 | 3.57406411  | 0.000352562 | 0.001073495 | -0.85014989 | ns |
| ADGRE1    | -0.04218459 | 0.019804601 | -3.57348876 | 0.000353328 | 0.001074706 | -0.85688857 | ns |
| DLG4      | -0.05617674 | 0.079126732 | -3.57295599 | 0.000354045 | 0.001075766 | -0.85976283 | ns |
| MMP10     | -0.05018256 | 0.044186699 | -3.5704328  | 0.000357485 | 0.00108509  | -0.86223234 | ns |
| DNAJB14   | -0.05043781 | 0.022745037 | -3.5645034  | 0.000365644 | 0.001108704 | -0.88875954 | ns |
| IFNGR2    | -0.04326255 | 0.106773127 | -3.5579608  | 0.000374878 | 0.001135523 | -0.9060467  | ns |
| ANXA3     | -0.05864008 | -0.01449547 | -3.55300805 | 0.000381985 | 0.001155852 | -0.93052319 | ns |
| SPTLC1    | -0.02887446 | 0.044138998 | -3.55046269 | 0.000385694 | 0.001165866 | -0.93938468 | ns |
| LGALS4    | -0.04353821 | -0.03602431 | -3.54978084 | 0.000386707 | 0.001167718 | -0.93584455 | ns |

|          |             |             |             |             |             |             |    |
|----------|-------------|-------------|-------------|-------------|-------------|-------------|----|
| CLEC11A  | -0.03862134 | -0.03148448 | -3.54550833 | 0.000393024 | 0.001185569 | -0.95231076 | ns |
| TIMM10   | -0.03075004 | 0.043848896 | -3.54348758 | 0.000396034 | 0.001193416 | -0.9640196  | ns |
| CTF1     | -0.06994214 | 0.019650402 | -3.54136314 | 0.000399267 | 0.001201917 | -0.95898304 | ns |
| GP2      | 0.070623286 | 0.113621163 | 3.538766193 | 0.000403229 | 0.001212595 | -0.96206194 | ns |
| IL15     | -0.02667157 | -0.02098871 | -3.52512739 | 0.000424513 | 0.001273877 | -1.02467253 | ns |
| POSTN    | 0.028200784 | 0.005027423 | 3.524710409 | 0.00042517  | 0.001273877 | -1.02955126 | ns |
| DCTN6    | -0.05909298 | 0.086028779 | -3.52467765 | 0.000425256 | 0.001273877 | -1.01771343 | ns |
| CCN4     | -0.03275671 | 0.020350445 | -3.52459445 | 0.000425353 | 0.001273877 | -1.03193872 | ns |
| PLXNB3   | -0.03862099 | 0.018616671 | -3.52371796 | 0.000426784 | 0.001276852 | -1.02564983 | ns |
| LILRA2   | -0.03021213 | -0.03608417 | -3.52273123 | 0.000428364 | 0.001280268 | -1.03339651 | ns |
| SPART    | -0.06043023 | 0.012599756 | -3.52166069 | 0.000430114 | 0.001284185 | -1.02867928 | ns |
| DPP7     | -0.04858115 | -0.0288278  | -3.51874143 | 0.000434864 | 0.001296031 | -1.04260041 | ns |
| IDI2     | -0.03808691 | 0.025150723 | -3.51868517 | 0.000434969 | 0.001296031 | -1.0386841  | ns |
| SOST     | -0.03202144 | -0.03158784 | -3.51496524 | 0.000441084 | 0.001312912 | -1.05763927 | ns |
| FLI1     | -0.09088525 | 0.050508276 | -3.51455132 | 0.000441792 | 0.001313097 | -1.05225098 | ns |
| METAP2   | -0.04800802 | -0.05762615 | -3.51437568 | 0.000442046 | 0.001313097 | -1.06690394 | ns |
| PTPRN2   | -0.0257577  | -0.00382663 | -3.51216552 | 0.000445761 | 0.001322786 | -1.06435936 | ns |
| DCBLD2   | -0.02738839 | -0.02543758 | -3.51111009 | 0.000447513 | 0.001326637 | -1.07542473 | ns |
| GCC1     | -0.08332709 | -0.0693852  | -3.50444768 | 0.000458847 | 0.001358496 | -1.10070481 | ns |
| TANK     | -0.05707083 | 0.03529172  | -3.50426765 | 0.00045919  | 0.001358496 | -1.08929523 | ns |
| FLT4     | -0.02819369 | -0.05505408 | -3.50169149 | 0.000463621 | 0.001370215 | -1.10824696 | ns |
| PAFAH1B3 | -0.09131475 | 0.44885687  | -3.49984089 | 0.000466841 | 0.001378338 | -1.11763265 | ns |
| SELP     | -0.04665454 | -0.00719233 | -3.49771691 | 0.000470586 | 0.001387992 | -1.11945443 | ns |
| MTIF3    | -0.06589955 | -0.00924784 | -3.48930208 | 0.000485631 | 0.001430922 | -1.15235671 | ns |
| IL1R1    | -0.01752725 | -0.01258122 | -3.48798748 | 0.000488035 | 0.001436555 | -1.15341907 | ns |
| MUC13    | -0.03950222 | -0.03085114 | -3.48644764 | 0.000490875 | 0.001443459 | -1.15088801 | ns |
| CNDP1    | 0.036943607 | -0.0301518  | 3.485644789 | 0.000492323 | 0.001446262 | -1.16134594 | ns |
| FBP1     | -0.06061947 | -0.01463605 | -3.48385204 | 0.000495634 | 0.001454524 | -1.16633255 | ns |
| LRPAP1   | -0.04697906 | 0.08690824  | -3.48151161 | 0.000499964 | 0.001465759 | -1.18125367 | ns |
| MYOM3    | 0.069652567 | 0.000596725 | 3.477800164 | 0.000506966 | 0.001484573 | -1.18121538 | ns |
| CXCL11   | -0.06302867 | 0.023056925 | -3.47755358 | 0.000507399 | 0.001484573 | -1.19494173 | ns |
| LIFR     | 0.018965505 | -0.0012579  | 3.476035828 | 0.000510291 | 0.001491543 | -1.1954605  | ns |
| PRELP    | -0.01813792 | -0.02761078 | -3.47529504 | 0.000511704 | 0.001494174 | -1.19585504 | ns |
| OLFM4    | -0.09371907 | -0.15120375 | -3.47061778 | 0.000520766 | 0.001519117 | -1.18858668 | ns |
| LTA4H    | -0.04704852 | 0.041349871 | -3.46800577 | 0.000525757 | 0.001532147 | -1.22858264 | ns |
| SPINK4   | -0.05019296 | 0.028102072 | -3.4669084  | 0.000527923 | 0.001536924 | -1.22695089 | ns |
| COQ7     | -0.03321397 | 0.063308906 | -3.46462265 | 0.000532452 | 0.001548565 | -1.22585208 | ns |
| SPRY2    | -0.07518603 | 0.051050357 | -3.45938419 | 0.000542906 | 0.001577398 | -1.24459108 | ns |
| TXNRD1   | -0.03823662 | 0.014519003 | -3.45769824 | 0.000546286 | 0.001585641 | -1.25897642 | ns |
| MDH1     | -0.03073129 | 0.01677717  | -3.45220344 | 0.000557523 | 0.001616652 | -1.27726404 | ns |
| SRPX     | 0.026142806 | -0.02342491 | 3.451018471 | 0.000559965 | 0.00162212  | -1.28542794 | ns |
| CEMIP2   | -0.02351815 | 0.00662168  | -3.44697091 | 0.00056846  | 0.001644913 | -1.28494258 | ns |
| CTSB     | 0.04401915  | 0.074758993 | 3.446719417 | 0.00056896  | 0.001644913 | -1.29458497 | ns |
| CAMSAP1  | -0.0827807  | 0.043670477 | -3.44373232 | 0.000575258 | 0.001661477 | -1.31124172 | ns |
| USP8     | -0.07677543 | 0.046545447 | -3.44121064 | 0.000580688 | 0.001675504 | -1.30644605 | ns |
| APOC1    | 0.027517362 | 0.016069799 | 3.435949834 | 0.000592032 | 0.00170655  | -1.33543567 | ns |
| PRKAB1   | -0.04369714 | 0.058418285 | -3.43560205 | 0.000592829 | 0.001707159 | -1.32606669 | ns |
| NENF     | -0.0851453  | 0.381918551 | -3.43513693 | 0.000593811 | 0.00170723  | -1.33881281 | ns |
| SPAG1    | -0.04348933 | 0.053027227 | -3.4350369  | 0.000594022 | 0.00170723  | -1.34096664 | ns |
| RABEP1   | -0.05888046 | 0.025085284 | -3.43349214 | 0.000597454 | 0.001715404 | -1.33336984 | ns |
| RBPM52   | -0.0784138  | 0.010229808 | -3.43278731 | 0.000599015 | 0.001718196 | -1.33495449 | ns |
| CDHR1    | -0.0339042  | 0.027509691 | -3.42727337 | 0.000611304 | 0.001751724 | -1.35416293 | ns |
| AHCY     | -0.05387969 | -0.01930193 | -3.42695719 | 0.00061199  | 0.001751971 | -1.36171233 | ns |
| STIP1    | -0.05351518 | 0.019212221 | -3.42439533 | 0.000617782 | 0.00176682  | -1.3719559  | ns |
| HS1BP3   | -0.06759578 | -0.01056884 | -3.42404897 | 0.000618596 | 0.001767418 | -1.36472564 | ns |
| PRKRA    | -0.05450531 | 0.022198325 | -3.41882719 | 0.000630584 | 0.001799908 | -1.3820112  | ns |
| PON1     | 0.019009521 | -0.00682404 | 3.415613743 | 0.000638019 | 0.00181935  | -1.40514358 | ns |
| KLRF1    | -0.03082588 | 0.007081496 | -3.41183019 | 0.000646982 | 0.001843109 | -1.40469728 | ns |
| MKI67    | -0.02912317 | 0.045300991 | -3.40945926 | 0.000652627 | 0.00185738  | -1.41273297 | ns |
| SOD1     | -0.03799961 | 0.008830319 | -3.40859182 | 0.000654711 | 0.001861497 | -1.41471438 | ns |
| MTSS1    | -0.08369184 | -0.00883268 | -3.40722202 | 0.000657949 | 0.001868882 | -1.4336603  | ns |
| CORO1A   | -0.07091283 | 0.098387256 | -3.40412277 | 0.00066551  | 0.001888523 | -1.4282992  | ns |
| NEDD9    | -0.02498924 | 0.020931097 | -3.40320183 | 0.000667748 | 0.00189295  | -1.4339142  | ns |
| PSRC1    | -0.04687976 | 0.098925761 | -3.40294799 | 0.000668367 | 0.00189295  | -1.43583433 | ns |
| APOL1    | -0.04460671 | 0.088976768 | -3.39879026 | 0.000678552 | 0.001919935 | -1.46211527 | ns |
| CRISP2   | 0.045733883 | -0.04755949 | 3.396885377 | 0.000683285 | 0.001931455 | -1.47121707 | ns |

|          |             |             |             |             |             |             |    |
|----------|-------------|-------------|-------------|-------------|-------------|-------------|----|
| PRUNE2   | -0.02174993 | 0.013648507 | -3.3911896  | 0.000697663 | 0.001970191 | -1.48123211 | ns |
| GYS1     | -0.07340902 | 0.009472521 | -3.39076828 | 0.000698759 | 0.001971379 | -1.47767934 | ns |
| WFDC12   | -0.05061128 | -0.06381056 | -3.38977151 | 0.000701254 | 0.001976508 | -1.49404471 | ns |
| PQBP1    | -0.04581296 | 0.044443246 | -3.38406967 | 0.000716022 | 0.002016185 | -1.49949757 | ns |
| MAP3K5   | -0.07936501 | 0.119041837 | -3.38151998 | 0.000722695 | 0.002033015 | -1.50806877 | ns |
| CNP      | -0.05925617 | -0.0023474  | -3.37191533 | 0.000748353 | 0.002103168 | -1.53973554 | ns |
| LIF      | -0.04088448 | 0.014678149 | -3.37018923 | 0.000753051 | 0.002114336 | -1.54696551 | ns |
| ERBIN    | -0.08187075 | -0.05398046 | -3.36330215 | 0.00077205  | 0.002165595 | -1.57620833 | ns |
| USP25    | -0.05364095 | 0.006409947 | -3.35803968 | 0.000786869 | 0.00220329  | -1.59908585 | ns |
| FABP2    | 0.061600074 | 0.057176035 | 3.358000925 | 0.000786997 | 0.00220329  | -1.59420587 | ns |
| MLN      | -0.07040462 | -0.0711332  | -3.35467183 | 0.000796517 | 0.002227806 | -1.60741807 | ns |
| SIGLEC7  | -0.02198297 | -0.03691398 | -3.3501225  | 0.00080971  | 0.002262539 | -1.62046848 | ns |
| ARHGEF1  | -0.06604271 | -0.03548987 | -3.34255734 | 0.000832066 | 0.002321384 | -1.65156233 | ns |
| ANXA1    | -0.03149431 | -0.02239906 | -3.3424791  | 0.000832359 | 0.002321384 | -1.63678726 | ns |
| SUSD1    | -0.03799053 | -0.0524417  | -3.34185408 | 0.000834232 | 0.002324388 | -1.64131403 | ns |
| SIRT2    | -0.07016154 | -0.02350642 | -3.34086262 | 0.000837184 | 0.002330388 | -1.65096579 | ns |
| FKBP4    | -0.03471206 | -0.02131707 | -3.33768233 | 0.000846821 | 0.002354969 | -1.66082589 | ns |
| MAP2K1   | -0.04678231 | 0.02138386  | -3.33517288 | 0.000854469 | 0.002373695 | -1.67507577 | ns |
| ATG16L1  | -0.06250904 | -0.00849424 | -3.33494141 | 0.00085518  | 0.002373695 | -1.67584305 | ns |
| NID1     | -0.02962902 | -0.02001742 | -3.33466276 | 0.00085606  | 0.002373878 | -1.67149889 | ns |
| GOLGA3   | -0.05641621 | 0.05655925  | -3.33396784 | 0.000858169 | 0.002377471 | -1.68096227 | ns |
| NACC1    | -0.04126408 | 0.03640718  | -3.33226179 | 0.000863454 | 0.002389843 | -1.68479365 | ns |
| COMMD1   | -0.0449949  | 0.020862042 | -3.32448918 | 0.000887919 | 0.002453381 | -1.69857232 | ns |
| AIF1     | -0.04059869 | -0.01505848 | -3.32443684 | 0.00088809  | 0.002453381 | -1.69827425 | ns |
| CEBPA    | -0.02803854 | 0.048671643 | -3.31757876 | 0.000910167 | 0.002511993 | -1.71984291 | ns |
| HS6ST1   | -0.02541964 | 0.001433456 | -3.31474251 | 0.000919377 | 0.002535016 | -1.74520851 | ns |
| PCSK9    | -0.03064364 | -0.02306852 | -3.3117927  | 0.00092912  | 0.002559463 | -1.75368325 | ns |
| PTTG1    | -0.02968376 | 0.007710266 | -3.31133825 | 0.000930663 | 0.002561298 | -1.74718793 | ns |
| YARS1    | -0.10609824 | -0.18103958 | -3.30714967 | 0.000944654 | 0.002597354 | -1.76758169 | ns |
| ERP29    | -0.08552453 | -0.04564359 | -3.30623903 | 0.000947773 | 0.002602321 | -1.75952801 | ns |
| PDIA3    | -0.01856957 | -0.00153876 | -3.30591123 | 0.000948882 | 0.002602321 | -1.76060501 | ns |
| CACYBP   | -0.07445975 | -0.06890145 | -3.30583793 | 0.000949134 | 0.002602321 | -1.7598265  | ns |
| MZT1     | -0.03991304 | 0.068944765 | -3.30453931 | 0.00095355  | 0.002611975 | -1.76381443 | ns |
| PCYT2    | -0.05488599 | -0.02545529 | -3.30008762 | 0.000968733 | 0.002651078 | -1.79077087 | ns |
| WFIKN1   | -0.03118635 | 0.013343391 | -3.29818757 | 0.000975344 | 0.00266667  | -1.78946279 | ns |
| CHI3L1   | -0.05631661 | 0.00532414  | -3.29757198 | 0.000977529 | 0.002670146 | -1.78163651 | ns |
| ERI1     | -0.02448002 | 0.003819022 | -3.29590896 | 0.000983275 | 0.002683331 | -1.79784781 | ns |
| SDCCAG8  | -0.08329034 | -0.01535221 | -3.29172274 | 0.000997991 | 0.002720945 | -1.81824601 | ns |
| ITGB1    | 0.016522651 | 0.010320345 | 3.288972247 | 0.001007816 | 0.00274517  | -1.82079424 | ns |
| ADA      | -0.02683328 | 0.013489919 | -3.28761554 | 0.001012641 | 0.002754148 | -1.83356032 | ns |
| PAPPA    | -0.03530476 | -0.02010484 | -3.28753373 | 0.001012998 | 0.002754148 | -1.82071226 | ns |
| KLK13    | -0.03331887 | -0.01980778 | -3.28522527 | 0.00102135  | 0.00277427  | -1.82503872 | ns |
| IL31RA   | 0.028739319 | 0.021292701 | 3.284643179 | 0.001023462 | 0.002777424 | -1.82609516 | ns |
| PTPRB    | -0.02084204 | -0.0190152  | -3.28402187 | 0.00102564  | 0.00278075  | -1.84438213 | ns |
| NFYA     | -0.02812667 | 0.041567128 | -3.28202752 | 0.001032986 | 0.002798069 | -1.83707216 | ns |
| CIRBP    | -0.06868798 | -0.07475311 | -3.28066172 | 0.001037931 | 0.002808594 | -1.85430309 | ns |
| SMPD1    | -0.03688637 | -0.01653308 | -3.28026126 | 0.001039408 | 0.002808594 | -1.85552087 | ns |
| SWAP70   | -0.02582271 | 0.015111235 | -3.28016555 | 0.001039757 | 0.002808594 | -1.85592088 | ns |
| LAP3     | -0.03723293 | -0.01718026 | -3.27691418 | 0.00105185  | 0.002838635 | -1.8553524  | ns |
| CDNF     | -0.02330001 | -0.00268305 | -3.27603206 | 0.001055109 | 0.0028448   | -1.86414184 | ns |
| SMTN     | -0.07029561 | 0.163001878 | -3.27464221 | 0.001060283 | 0.002856114 | -1.87422485 | ns |
| DAPK2    | -0.03842946 | 0.045879284 | -3.27190011 | 0.001070681 | 0.002881464 | -1.86940598 | ns |
| MSRA     | -0.05580029 | -0.01907864 | -3.27107755 | 0.001073735 | 0.002887022 | -1.88443112 | ns |
| PRKAR1A  | -0.06422133 | -0.03534093 | -3.26829642 | 0.001084355 | 0.002912895 | -1.88959217 | ns |
| EFHD1    | -0.0239419  | -0.0017446  | -3.26775291 | 0.001086405 | 0.002915719 | -1.89821191 | ns |
| ATRN     | -0.01199744 | -0.01673262 | -3.26489254 | 0.001097432 | 0.00294261  | -1.9066771  | ns |
| ANXA11   | -0.05114896 | -0.13165385 | -3.25898018 | 0.001120568 | 0.003001889 | -1.92192709 | ns |
| HBEGF    | -0.05606205 | -0.02610994 | -3.25154693 | 0.001150244 | 0.003078562 | -1.95014911 | ns |
| RCC1     | -0.03574895 | 0.097805566 | -3.24865799 | 0.001161985 | 0.003107139 | -1.9582261  | ns |
| CCL27    | -0.04538956 | -0.07629135 | -3.24822692 | 0.001163769 | 0.003109062 | -1.95458536 | ns |
| PLEKH01  | -0.04987263 | 0.046256373 | -3.24729537 | 0.001167551 | 0.003116315 | -1.96354998 | ns |
| AXIN1    | -0.07305843 | -0.02693033 | -3.24594928 | 0.001173107 | 0.003127787 | -1.9640526  | ns |
| EIF4EBP1 | -0.04995933 | 0.012086571 | -3.24573604 | 0.001173991 | 0.003127787 | -1.96262398 | ns |
| AGRP     | -0.03972686 | -0.06768214 | -3.24494198 | 0.001177231 | 0.00313356  | -1.97210665 | ns |
| PDIA4    | -0.04291289 | 0.038371811 | -3.23791589 | 0.001206598 | 0.003208805 | -1.99340113 | ns |
| ENG      | 0.012867617 | 0.000188558 | 3.233966285 | 0.001223393 | 0.003250508 | -2.00686672 | ns |

|          |             |             |             |             |             |             |    |
|----------|-------------|-------------|-------------|-------------|-------------|-------------|----|
| VPS37A   | -0.06100212 | 0.032096605 | -3.23296399 | 0.001227726 | 0.003259055 | -2.00345234 | ns |
| MTHFSD   | -0.07946573 | 0.005947298 | -3.2315447  | 0.001233841 | 0.003272312 | -2.00663017 | ns |
| COX6B1   | -0.02258823 | 0.015733357 | -3.22962016 | 0.001242133 | 0.003291313 | -2.02049282 | ns |
| CDKN1A   | -0.08123488 | -0.04700679 | -3.22300988 | 0.00127117  | 0.0033652   | -2.03538859 | ns |
| GPI      | -0.03300022 | 0.021123681 | -3.22058595 | 0.00128193  | 0.003390612 | -2.0483463  | ns |
| DNAJB2   | -0.03895919 | 0.015920004 | -3.21862718 | 0.001290771 | 0.003410906 | -2.04359113 | ns |
| PTPRF    | -0.02128766 | -0.01171792 | -3.21674799 | 0.001299184 | 0.003430034 | -2.06206873 | ns |
| PTH      | -0.0560044  | -0.00385061 | -3.21559557 | 0.001304479 | 0.003440901 | -2.05245907 | ns |
| QSOX1    | -0.02928749 | 0.00675125  | -3.21437317 | 0.001310027 | 0.003452418 | -2.06004309 | ns |
| TFPI     | -0.02411753 | -0.02593067 | -3.21322276 | 0.001315276 | 0.003460156 | -2.06453902 | ns |
| SNX5     | -0.02071873 | 0.045764639 | -3.21321625 | 0.001315333 | 0.003460156 | -2.06005582 | ns |
| LHPP     | -0.04537394 | 0.026361004 | -3.20725219 | 0.001342839 | 0.003529335 | -2.08823114 | ns |
| TPD52L2  | -0.07564113 | -0.09761639 | -3.20207003 | 0.001367257 | 0.00359028  | -2.09641838 | ns |
| VEGFD    | 0.027235975 | 0.020503335 | 3.200607305 | 0.001374146 | 0.003605128 | -2.1133944  | ns |
| SNU13    | -0.04543236 | 0.150081495 | -3.19951221 | 0.001379461 | 0.003615822 | -2.10283008 | ns |
| NIT1     | -0.03350478 | -0.06819289 | -3.19854366 | 0.001384091 | 0.003623429 | -2.10680454 | ns |
| CAMKK1   | -0.03370104 | 0.027057884 | -3.19838797 | 0.001384845 | 0.003623429 | -2.10682554 | ns |
| BAMBI    | -0.02130033 | 0.002512311 | -3.19780901 | 0.001387626 | 0.003627456 | -2.10866568 | ns |
| STX6     | -0.0516991  | 0.130004856 | -3.19727734 | 0.001390185 | 0.003630894 | -2.11035524 | ns |
| PDLIM7   | -0.09599309 | 0.018858306 | -3.19344052 | 0.001408709 | 0.003675986 | -2.13320054 | ns |
| SLC9A3R1 | -0.05890824 | 0.006415534 | -3.18253672 | 0.001462859 | 0.003813883 | -2.15839152 | ns |
| THTPA    | -0.06104557 | 0.001931599 | -3.18113454 | 0.0014699   | 0.00382882  | -2.17306655 | ns |
| FXN      | -0.05421563 | -0.00255013 | -3.17838857 | 0.001483867 | 0.003861756 | -2.18523751 | ns |
| KIR2DS4  | -0.11899851 | 0.940693841 | -3.1766838  | 0.001492621 | 0.003878479 | -2.18799356 | ns |
| NAA80    | -0.08391221 | 0.011217804 | -3.17663318 | 0.001492949 | 0.003878479 | -2.17622068 | ns |
| MAPK9    | -0.03157435 | -0.01240264 | -3.17484255 | 0.001502141 | 0.00389889  | -2.19095282 | ns |
| CEP85    | -0.04734763 | 0.061124103 | -3.17425105 | 0.001505263 | 0.003903524 | -2.18325964 | ns |
| ZFYVE19  | -0.06208407 | -0.00220973 | -3.17276616 | 0.001512895 | 0.003919833 | -2.20035642 | ns |
| ING1     | -0.03433644 | 0.014180341 | -3.17205478 | 0.001516688 | 0.003926178 | -2.18995477 | ns |
| NSFL1C   | -0.0498665  | -0.01148979 | -3.16765762 | 0.001539704 | 0.003982227 | -2.21838992 | ns |
| SERPIN2  | 0.038396232 | 0.090164688 | 3.16661043  | 0.001545263 | 0.00399307  | -2.21975122 | ns |
| VPS53    | -0.05835037 | 0.062721379 | -3.16573273 | 0.001549962 | 0.004001671 | -2.21724236 | ns |
| VAMP8    | -0.06098251 | 0.008701051 | -3.16448074 | 0.001556695 | 0.004015503 | -2.21296293 | ns |
| CACNB3   | -0.058031   | -0.01162826 | -3.16242568 | 0.001567619 | 0.004040113 | -2.23482063 | ns |
| CPB2     | -0.01556451 | -0.01355439 | -3.16179725 | 0.001571016 | 0.004045298 | -2.23435455 | ns |
| IRAK1    | -0.0518136  | 0.040088056 | -3.15781751 | 0.001592678 | 0.004097463 | -2.23617051 | ns |
| CEACAM21 | -0.06337151 | 0.246080803 | -3.15454547 | 0.001610586 | 0.004139886 | -2.25479963 | ns |
| VAT1     | -0.01427279 | 0.004499444 | -3.14914207 | 0.001640656 | 0.004213469 | -2.26930913 | ns |
| FOXJ3    | -0.03051175 | 0.039407395 | -3.14704498 | 0.001652516 | 0.004238942 | -2.26764705 | ns |
| PHACTR2  | -0.07876359 | -0.03393942 | -3.14685683 | 0.001653478 | 0.004238942 | -2.28364191 | ns |
| RAB6A    | 0.034088845 | 0.055474091 | 3.144360977 | 0.001667674 | 0.004271587 | -2.28668204 | ns |
| CASP1    | -0.0500787  | -0.00098782 | -3.14029467 | 0.001691042 | 0.004327645 | -2.29070327 | ns |
| PRDX6    | 0.044364817 | 0.071347133 | 3.138264945 | 0.001702694 | 0.004350279 | -2.31120621 | ns |
| IL7      | -0.04743355 | 0.010567027 | -3.13824149 | 0.001702866 | 0.004350279 | -2.30578949 | ns |
| LYN      | -0.0634544  | -0.06077442 | -3.13742224 | 0.001707639 | 0.004358658 | -2.30592501 | ns |
| CLEC1A   | -0.02302623 | -0.0125372  | -3.13013259 | 0.001750612 | 0.0044639   | -2.32221393 | ns |
| MATN2    | -0.02146371 | -0.00991168 | -3.12990114 | 0.001751928 | 0.0044639   | -2.33086775 | ns |
| VSIR     | -0.0448286  | 0.061948223 | -3.12950038 | 0.001754328 | 0.004466118 | -2.33089201 | ns |
| TIGAR    | -0.03427121 | -0.02390478 | -3.12821261 | 0.001762089 | 0.004481968 | -2.32721426 | ns |
| SPRR1B   | -0.05852315 | 0.165800298 | -3.12754349 | 0.00176605  | 0.004488135 | -2.3352955  | ns |
| FARSA    | -0.04774018 | 0.118898617 | -3.12528911 | 0.001779667 | 0.004518806 | -2.33701089 | ns |
| RNASE10  | -0.03259276 | -0.00605866 | -3.11633418 | 0.001834585 | 0.004654204 | -2.36478168 | ns |
| EBAG9    | -0.06957916 | -0.01514031 | -3.1158785  | 0.001837377 | 0.004657241 | -2.37217649 | ns |
| CD48     | -0.02107473 | -0.02350429 | -3.11341028 | 0.00185278  | 0.00469221  | -2.38298036 | ns |
| PPCDC    | -0.03510794 | 0.011964808 | -3.11214664 | 0.001860697 | 0.004708176 | -2.39165061 | ns |
| CXCL3    | -0.06985826 | -0.09518409 | -3.11172083 | 0.001863423 | 0.004710991 | -2.38608586 | ns |
| KRT19    | -0.04666185 | 0.016545685 | -3.10995997 | 0.00187456  | 0.004735048 | -2.39271942 | ns |
| BIN2     | -0.06705067 | 0.032309115 | -3.10839938 | 0.00188447  | 0.004755966 | -2.39877479 | ns |
| NUDT16   | -0.05927757 | 0.000502154 | -3.10754364 | 0.001889917 | 0.004765594 | -2.40340128 | ns |
| MIF      | -0.05013215 | -0.04617923 | -3.10559627 | 0.001902421 | 0.004792985 | -2.40650561 | ns |
| ABRAXAS2 | -0.04507035 | 0.023782127 | -3.10472637 | 0.00190809  | 0.004803124 | -2.39976825 | ns |
| LRP1     | 0.019387706 | 0.014044627 | 3.103283245 | 0.001917352 | 0.004822281 | -2.4118073  | ns |
| INPPL1   | -0.07122511 | -0.01308788 | -3.10030452 | 0.001936729 | 0.004866823 | -2.42099097 | ns |
| PTPRK    | -0.01445348 | 0.011105959 | -3.09889157 | 0.001945945 | 0.004885779 | -2.43062928 | ns |
| PLB1     | 0.040273702 | -0.00954359 | 3.098620722 | 0.001947716 | 0.004886022 | -2.43246648 | ns |
| ACOT13   | -0.07613322 | -0.05739855 | -3.09771098 | 0.001953709 | 0.00489685  | -2.43426532 | ns |

|           |             |             |             |             |             |             |    |
|-----------|-------------|-------------|-------------|-------------|-------------|-------------|----|
| CNPY4     | -0.05521404 | -0.02078161 | -3.09714006 | 0.001957511 | 0.004898359 | -2.43073759 | ns |
| SNAP23    | -0.06369518 | -0.11194088 | -3.09711619 | 0.001957666 | 0.004898359 | -2.43110568 | ns |
| VAMP5     | -0.03855955 | 0.07240875  | -3.0880322  | 0.002018529 | 0.005046322 | -2.45230656 | ns |
| CAPS      | -0.06282439 | 0.183919936 | -3.08730017 | 0.002023401 | 0.005050051 | -2.46727217 | ns |
| FST       | -0.03673739 | 0.010201476 | -3.08729263 | 0.002023479 | 0.005050051 | -2.46346838 | ns |
| NFE2      | -0.05098379 | 0.033972294 | -3.08466233 | 0.00204152  | 0.005090724 | -2.46237942 | ns |
| UBXN1     | -0.0467246  | 0.028770496 | -3.08301897 | 0.002052804 | 0.005114494 | -2.46825072 | ns |
| MDK       | -0.0366417  | -0.00417166 | -3.0822099  | 0.002058319 | 0.005123863 | -2.48079054 | ns |
| DECR1     | -0.06905865 | -0.04681159 | -3.07727108 | 0.002092733 | 0.005205094 | -2.49413276 | ns |
| BCL2L15   | -0.03822871 | 0.052175926 | -3.07616393 | 0.002100591 | 0.005220192 | -2.48684605 | ns |
| ADGRV1    | 0.046183114 | 0.076882391 | 3.075390414 | 0.002106033 | 0.005225561 | -2.49124206 | ns |
| ASPSCR1   | -0.04563854 | 0.002254882 | -3.07532599 | 0.00210638  | 0.005225561 | -2.50485776 | ns |
| NDUFS6    | -0.05675529 | 0.046530358 | -3.07509604 | 0.00210812  | 0.005225561 | -2.4911858  | ns |
| RAB11FIP3 | -0.07300816 | -0.04093516 | -3.07097823 | 0.002137284 | 0.005293357 | -2.51727736 | ns |
| AP2B1     | -0.0328172  | 0.078026705 | -3.06692404 | 0.002166559 | 0.005361316 | -2.51661037 | ns |
| CDC27     | -0.04375143 | 0.075676815 | -3.06478728 | 0.002182106 | 0.005395215 | -2.52263964 | ns |
| SHMT1     | -0.06211137 | -0.02802833 | -3.06388302 | 0.002188622 | 0.005406749 | -2.5350354  | ns |
| LEG1      | 0.04518027  | 0.056077238 | 3.0589404   | 0.002225223 | 0.005492519 | -2.52562538 | ns |
| MPRIP     | -0.02961458 | -0.02048133 | -3.05829028 | 0.002229853 | 0.005499299 | -2.55439334 | ns |
| GAL       | 0.046951546 | 0.068500376 | 3.054329448 | 0.002259491 | 0.005567692 | -2.56516159 | ns |
| TJAP1     | -0.0598554  | 0.026097169 | -3.0531453  | 0.002268416 | 0.005584971 | -2.56941949 | ns |
| SCT       | 0.030197255 | 0.04387826  | 3.05242166  | 0.002273971 | 0.005593931 | -2.56071224 | ns |
| SPINT2    | -0.02874268 | -0.02112183 | -3.05126122 | 0.002282697 | 0.005610668 | -2.57447235 | ns |
| ENTPD6    | -0.02002995 | -0.04582874 | -3.04733175 | 0.002312825 | 0.00567994  | -2.5764007  | ns |
| CCL15     | -0.03020745 | 0.03510263  | -3.0437504  | 0.002340401 | 0.005742833 | -2.60036682 | ns |
| GMFG      | -0.04772738 | -0.01471268 | -3.04241165 | 0.002350836 | 0.005763595 | -2.60407847 | ns |
| SLC9A3R2  | -0.03351376 | 0.062944497 | -3.04139912 | 0.002358759 | 0.005778167 | -2.6060887  | ns |
| METAP1D   | -0.05819456 | -0.01158085 | -3.03897595 | 0.002377833 | 0.005820011 | -2.61054306 | ns |
| CA2       | -0.05107806 | 0.022368739 | -3.03630932 | 0.002398967 | 0.00586682  | -2.61691914 | ns |
| MEPE      | -0.01771951 | -0.0170716  | -3.03569019 | 0.002403886 | 0.005873931 | -2.61826165 | ns |
| ACYP1     | -0.04428677 | -0.00051881 | -3.0322829  | 0.002431241 | 0.005933326 | -2.62033798 | ns |
| YES1      | -0.08171654 | -0.03419532 | -3.03214914 | 0.002432257 | 0.005933326 | -2.62871311 | ns |
| PPP2R5A   | -0.07812024 | 0.03624698  | -3.03167284 | 0.002436052 | 0.005937623 | -2.63544745 | ns |
| DNAJB1    | -0.06292003 | -0.03943587 | -3.03121772 | 0.002439769 | 0.005941722 | -2.63151993 | ns |
| ILKAP     | -0.04104773 | 0.019983732 | -3.02456205 | 0.002494135 | 0.006069063 | -2.64452551 | ns |
| SIL1      | -0.02132811 | 0.036300461 | -3.02385317 | 0.002499972 | 0.006074458 | -2.64697343 | ns |
| CMC1      | -0.05960421 | 0.010765939 | -3.02377427 | 0.002500513 | 0.006074458 | -2.66027241 | ns |
| GATD3     | -0.05073186 | 0.025262772 | -3.02284942 | 0.002508274 | 0.006088246 | -2.64998966 | ns |
| MARS1     | -0.05652099 | -0.01219094 | -3.01858469 | 0.002543818 | 0.006169392 | -2.66259922 | ns |
| CCL4      | -0.04690804 | 0.017137481 | -3.0143484  | 0.002579524 | 0.006250797 | -2.68362879 | ns |
| WFDC1     | -0.03643813 | 0.056233955 | -3.01333247 | 0.00258823  | 0.006266052 | -2.68184648 | ns |
| EGFL7     | -0.02824707 | -0.00495129 | -3.01311506 | 0.002590111 | 0.006266052 | -2.67871109 | ns |
| TCTN3     | -0.01954462 | -0.02225449 | -3.01229305 | 0.002597007 | 0.006277535 | -2.69471799 | ns |
| ANXA10    | -0.05441052 | 0.044104346 | -3.00860822 | 0.002628809 | 0.006349149 | -2.69309588 | ns |
| KDR       | -0.01803941 | -0.01898273 | -3.00792038 | 0.002634659 | 0.006358019 | -2.7056595  | ns |
| ADAMTS4   | -0.02304723 | -0.01515381 | -3.00599597 | 0.002651494 | 0.006393363 | -2.69892781 | ns |
| NOTCH2    | -0.0136626  | 0.0187563   | -3.00427238 | 0.002666426 | 0.006424063 | -2.71827364 | ns |
| LAYN      | -0.02191706 | -0.00549234 | -3.00336227 | 0.002674479 | 0.006438153 | -2.71324043 | ns |
| LTBP2     | 0.021335828 | -0.01365268 | 3.001641613 | 0.002689554 | 0.006467744 | -2.72689577 | ns |
| SIGLEC5   | -0.08327598 | -0.34862665 | -3.00145954 | 0.002691202 | 0.006467744 | -2.72351503 | ns |
| DAG1      | -0.03401178 | -0.01277484 | -3.00030989 | 0.002701362 | 0.006486823 | -2.72772173 | ns |
| TNR       | 0.029891094 | 0.04344359  | 2.999843102 | 0.002705544 | 0.006491527 | -2.72485908 | ns |
| UFD1      | -0.0917387  | -0.07061145 | -2.9976217  | 0.002725274 | 0.006527212 | -2.73749078 | ns |
| CTSF      | 0.028059647 | -0.00066035 | 2.997422552 | 0.002727062 | 0.006527212 | -2.7369938  | ns |
| CCL17     | -0.06352522 | -0.08126845 | -2.99742026 | 0.002727123 | 0.006527212 | -2.73217564 | ns |
| RRAS      | -0.08528869 | 0.130325547 | -2.99422486 | 0.002755884 | 0.006590647 | -2.73558923 | ns |
| NFU1      | -0.06651833 | -0.04513239 | -2.99151522 | 0.002780344 | 0.006643702 | -2.75566875 | ns |
| IFT20     | -0.02932392 | 0.054336889 | -2.99080627 | 0.002786904 | 0.006653932 | -2.7457573  | ns |
| KLF4      | -0.02698976 | 0.003301661 | -2.98515538 | 0.002838891 | 0.006772517 | -2.76301519 | ns |
| GORASP2   | -0.03091934 | 0.037415115 | -2.98481526 | 0.002841934 | 0.006774242 | -2.77557078 | ns |
| GAS2      | -0.03461043 | 0.061635028 | -2.98385523 | 0.002850917 | 0.006790113 | -2.77171537 | ns |
| MPI       | -0.06057609 | 0.02168952  | -2.981117   | 0.00287651  | 0.006845483 | -2.78122827 | ns |
| NFKB1     | -0.0486957  | 0.016001264 | -2.97770235 | 0.00290881  | 0.006916714 | -2.7837165  | ns |
| TNFAIP8   | -0.02469699 | 0.006146925 | -2.97558178 | 0.002928962 | 0.006958967 | -2.79162632 | ns |
| WASF1     | -0.06526588 | 0.084448294 | -2.9680905  | 0.003001273 | 0.007124973 | -2.81328687 | ns |
| MAPRE3    | -0.09610662 | 0.546414276 | -2.96429863 | 0.003038499 | 0.007207488 | -2.82161658 | ns |

|          |             |             |             |             |             |             |    |
|----------|-------------|-------------|-------------|-------------|-------------|-------------|----|
| LTO1     | -0.02886527 | 0.019807427 | -2.96121766 | 0.003069018 | 0.007273972 | -2.83400655 | ns |
| TINAGL1  | -0.0151586  | -0.01256524 | -2.95960001 | 0.00308512  | 0.007306204 | -2.84363474 | ns |
| JUN      | -0.03625729 | 0.052226357 | -2.95818462 | 0.003099362 | 0.007333984 | -2.84292913 | ns |
| FCRL3    | -0.03738488 | -0.02485141 | -2.95488408 | 0.003132692 | 0.007406851 | -2.85262825 | ns |
| GBA      | -0.03503276 | -0.02220117 | -2.9543644  | 0.003137967 | 0.007413319 | -2.85342683 | ns |
| LAMTOR5  | -0.02663807 | 0.028809154 | -2.95317123 | 0.00315001  | 0.007435754 | -2.86903845 | ns |
| DPP4     | 0.020153424 | -0.0035965  | 2.951644951 | 0.003165759 | 0.007466894 | -2.85876289 | ns |
| ITGB1BP1 | -0.02804442 | -0.01081812 | -2.94726424 | 0.003210913 | 0.007567284 | -2.8737665  | ns |
| GGCT     | -0.03134113 | 0.019026555 | -2.94569384 | 0.003227115 | 0.007599336 | -2.89115894 | ns |
| TIMP3    | -0.09032588 | 0.089397347 | -2.94423182 | 0.003242406 | 0.007629189 | -2.89341147 | ns |
| TK1      | -0.02901087 | 0.034499433 | -2.93857009 | 0.003302235 | 0.007763708 | -2.90501052 | ns |
| AKR1C4   | -0.03646951 | 0.040982254 | -2.93789706 | 0.003309474 | 0.007774467 | -2.90190794 | ns |
| NUDC     | -0.04408846 | -0.0570737  | -2.93760864 | 0.003312401 | 0.00777509  | -2.91651719 | ns |
| TNFSF11  | -0.04267868 | 0.033923726 | -2.936998   | 0.003318987 | 0.007778652 | -2.91343642 | ns |
| PTPN1    | -0.05533393 | 0.050322175 | -2.93697594 | 0.003319247 | 0.007778652 | -2.91035698 | ns |
| NOTCH1   | -0.01055309 | 0.001643544 | -2.93627024 | 0.003326726 | 0.007789929 | -2.91983614 | ns |
| COMT     | -0.05778781 | -0.0497991  | -2.93591132 | 0.003330764 | 0.007793133 | -2.904057   | ns |
| ENPP5    | 0.03017972  | -0.014431   | 2.935123421 | 0.00333907  | 0.007806313 | -2.9200286  | ns |
| DCTN1    | -0.0453876  | 0.000973225 | -2.93426478 | 0.003348284 | 0.00782159  | -2.92694513 | ns |
| SSB      | -0.03881718 | 0.078825803 | -2.93222107 | 0.003370533 | 0.007867272 | -2.91862206 | ns |
| KAZN     | -0.06722632 | -0.05088238 | -2.9301846  | 0.00339256  | 0.007907417 | -2.93618622 | ns |
| KIFBP    | -0.05698283 | -0.1074722  | -2.93013555 | 0.003393148 | 0.007907417 | -2.9310101  | ns |
| HARS1    | -0.05321997 | -0.01981114 | -2.92366495 | 0.003464416 | 0.008067062 | -2.9526166  | ns |
| GFRA3    | 0.019006687 | 0.018740388 | 2.922289082 | 0.003479799 | 0.008096424 | -2.95145867 | ns |
| AIDA     | -0.05601275 | 0.179887789 | -2.92130558 | 0.003490834 | 0.008115633 | -2.94996042 | ns |
| CLSTN3   | -0.01931339 | 0.002806415 | -2.92051212 | 0.003499602 | 0.008129545 | -2.96532443 | ns |
| SCG2     | -0.02089547 | 0.003569741 | -2.92018327 | 0.003503312 | 0.008131694 | -2.96579289 | ns |
| ATXN2L   | -0.03038077 | 0.064236122 | -2.91923025 | 0.003514011 | 0.008150049 | -2.96995924 | ns |
| PPP1R2   | -0.05449174 | -0.00658199 | -2.91834347 | 0.003524086 | 0.00816693  | -2.965584   | ns |
| DTD1     | -0.05541046 | 0.014357312 | -2.91775654 | 0.003530777 | 0.008175947 | -2.96109429 | ns |
| CST5     | 0.037601274 | 0.032074523 | 2.914790241 | 0.003564511 | 0.008246835 | -2.96924245 | ns |
| REEP4    | -0.04054177 | 0.104006957 | -2.91455584 | 0.003567038 | 0.008246835 | -2.98351396 | ns |
| CD207    | -0.0257024  | -0.00969881 | -2.91324517 | 0.003582204 | 0.008275345 | -2.97241376 | ns |
| NRTN     | -0.03371937 | -0.00696535 | -2.91286675 | 0.003586519 | 0.008287864 | -2.97515703 | ns |
| C1QTNF9  | 0.031109121 | -0.03522758 | 2.912569279 | 0.003589928 | 0.008280087 | -2.97539583 | ns |
| HSD17B14 | -0.03892455 | -0.01463328 | -2.9114105  | 0.003603136 | 0.008301052 | -2.99170834 | ns |
| GMPR2    | -0.04266238 | 0.02200311  | -2.911285   | 0.003604703 | 0.008301052 | -2.97984194 | ns |
| SH3BP1   | -0.03151713 | 0.081250058 | -2.90957522 | 0.00362436  | 0.008339741 | -2.99600838 | ns |
| NDUFB7   | -0.05618569 | 0.022389467 | -2.90729773 | 0.003650841 | 0.008394059 | -3.0025933  | ns |
| SERPINB6 | -0.04095567 | 0.008138884 | -2.90578216 | 0.003668566 | 0.008428177 | -3.00725467 | ns |
| OGFR     | -0.02262803 | 0.002892987 | -2.9052338  | 0.003675046 | 0.008436426 | -3.00323251 | ns |
| CRTAC1   | 0.020269602 | -0.03935703 | 2.902949042 | 0.003701876 | 0.008491342 | -3.01654923 | ns |
| ICAM4    | 0.03655063  | -0.0441496  | 2.902455612 | 0.003707766 | 0.008498177 | -3.01369254 | ns |
| SLC51B   | 0.048212198 | 0.179493295 | 2.901569919 | 0.003718368 | 0.008515791 | -3.00616056 | ns |
| DNPH1    | -0.03566897 | 0.001263057 | -2.89793666 | 0.003761564 | 0.008607968 | -3.02723465 | ns |
| CEP43    | -0.04608311 | 0.019300825 | -2.89647789 | 0.003779236 | 0.008641636 | -3.01939336 | ns |
| TNFSF8   | -0.02222601 | -0.00572543 | -2.89522339 | 0.003794184 | 0.008669028 | -3.03804325 | ns |
| IL20RA   | -0.03077594 | 0.052029597 | -2.89464503 | 0.00380131  | 0.008678518 | -3.02774938 | ns |
| PTGES2   | -0.03410763 | 0.00635611  | -2.89364399 | 0.003813517 | 0.008699586 | -3.02479671 | ns |
| ECI2     | -0.03888561 | 0.081604194 | -2.88932266 | 0.003866245 | 0.008812985 | -3.04140735 | ns |
| PADI2    | -0.03919686 | 0.060466111 | -2.8880489  | 0.0038819   | 0.008841769 | -3.04670614 | ns |
| NMT1     | -0.04144769 | 0.101346928 | -2.88632839 | 0.003903026 | 0.008882959 | -3.06490596 | ns |
| CIAPIN1  | -0.04278377 | -0.0048109  | -2.88510272 | 0.003918277 | 0.008910723 | -3.06540135 | ns |
| IL17C    | -0.04641298 | 0.029765727 | -2.88341872 | 0.003939395 | 0.008951776 | -3.05998714 | ns |
| EIF4G3   | -0.04214719 | 0.084483404 | -2.88040333 | 0.003977103 | 0.009030435 | -3.08189    | ns |
| SELL     | -0.01428107 | 0.010235057 | -2.87969854 | 0.003986009 | 0.009043625 | -3.08307401 | ns |
| GGACT    | -0.04459376 | 0.024296281 | -2.87839136 | 0.004002558 | 0.009074122 | -3.08678055 | ns |
| GRP      | -0.03298979 | -0.0078918  | -2.87750723 | 0.004013934 | 0.009089022 | -3.07617734 | ns |
| TRDMT1   | -0.05341986 | 0.072068488 | -2.87738995 | 0.004015356 | 0.009089022 | -3.0818584  | ns |
| PRKG1    | -0.08004057 | -0.03720489 | -2.87548818 | 0.004039656 | 0.009136945 | -3.08279205 | ns |
| NAGA     | -0.03732985 | 0.083597461 | -2.87444788 | 0.004053033 | 0.009160105 | -3.0824015  | ns |
| GNLY     | -0.0348641  | -0.04255065 | -2.86826335 | 0.004132936 | 0.009333468 | -3.11210817 | ns |
| CES3     | -0.04861167 | 0.105642    | -2.86790869 | 0.004137596 | 0.009336769 | -3.11033323 | ns |
| F13B     | -0.01592929 | -0.01699364 | -2.86646534 | 0.004156466 | 0.009372109 | -3.1173563  | ns |
| CELA2A   | 0.036537527 | 0.010258095 | 2.866037019 | 0.004162057 | 0.009377474 | -3.12162468 | ns |
| AK1      | -0.04382594 | 0.007444219 | -2.86511145 | 0.004174299 | 0.009397806 | -3.11860111 | ns |



|          |             |             |             |             |             |             |    |
|----------|-------------|-------------|-------------|-------------|-------------|-------------|----|
| GLRX5    | -0.0545909  | 0.00724146  | -2.86221577 | 0.004212671 | 0.009476887 | -3.12063963 | ns |
| DBNL     | -0.06264112 | -0.04412986 | -2.85907933 | 0.004254425 | 0.009563449 | -3.13903447 | ns |
| PPP1R14A | -0.04909884 | -0.00945929 | -2.85681062 | 0.004284895 | 0.009624533 | -3.14917215 | ns |
| OPLAH    | -0.04304718 | 0.026716267 | -2.85595663 | 0.004296599 | 0.009643404 | -3.13758488 | ns |
| TBCA     | -0.05347414 | 0.01215821  | -2.85551384 | 0.004302565 | 0.00964506  | -3.13968437 | ns |
| GLRX     | -0.03880448 | 0.00327093  | -2.85540971 | 0.004303943 | 0.00964506  | -3.14399513 | ns |
| TF       | -0.01352322 | -0.00701648 | -2.85215537 | 0.004348132 | 0.009736614 | -3.16154805 | ns |
| DBN1     | -0.03277463 | 0.046510328 | -2.85118709 | 0.004361564 | 0.009759209 | -3.14954799 | ns |
| ATP6V1G1 | -0.04544489 | 0.034673694 | -2.84946133 | 0.004385266 | 0.009801683 | -3.15600252 | ns |
| CDH23    | 0.01637873  | 0.015483431 | 2.84930492  | 0.00438726  | 0.009801683 | -3.16954499 | ns |
| PMM2     | -0.03716545 | 0.041929373 | -2.84760465 | 0.004410933 | 0.009847037 | -3.16035133 | ns |
| PSME1    | -0.02531943 | -0.00260616 | -2.8456575  | 0.004437884 | 0.009899634 | -3.17281407 | ns |
| DNPEP    | -0.03484485 | 0.009947578 | -2.84370509 | 0.004465064 | 0.009952662 | -3.18539161 | ns |
| CDH17    | 0.045124791 | 0.068689641 | 2.842060814 | 0.004488219 | 0.009996644 | -3.18398788 | ns |
| FAM13A   | -0.04226295 | 0.053318985 | -2.83750216 | 0.00455272  | 0.010132578 | -3.20189583 | ns |
| DKK3     | 0.019437981 | 0.007080971 | 2.834018643 | 0.004602601 | 0.010235792 | -3.2131166  | ns |
| MRPL58   | -0.0451709  | 0.125381575 | -2.83240211 | 0.00462592  | 0.010279822 | -3.21819904 | ns |
| NCLN     | -0.03595609 | 0.102801357 | -2.82487952 | 0.004736039 | 0.010516527 | -3.22606231 | ns |
| DKK1     | -0.03930539 | -0.04478916 | -2.82414796 | 0.004746696 | 0.010532183 | -3.24143736 | ns |
| PFKFB2   | -0.05120531 | 0.001772355 | -2.82147319 | 0.004786533 | 0.010612511 | -3.24105309 | ns |
| DMP1     | 0.03693627  | 0.010928345 | 2.820325253 | 0.004803762 | 0.010642629 | -3.23810346 | ns |
| ARHGAP45 | -0.05074094 | -0.00201376 | -2.81925811 | 0.004819727 | 0.010669903 | -3.24193835 | ns |
| PGLYRP2  | -0.01867069 | -0.03856765 | -2.81714212 | 0.004851527 | 0.010730306 | -3.25272288 | ns |
| IKBK     | -0.06055989 | -0.00835634 | -2.81695253 | 0.004854361 | 0.010730306 | -3.25676122 | ns |
| PCBP2    | -0.04418278 | -0.00017281 | -2.81562722 | 0.004874347 | 0.010766335 | -3.26529511 | ns |
| NME3     | -0.01518251 | 0.003821683 | -2.81454837 | 0.004890797 | 0.010782659 | -3.26257776 | ns |
| TOR1AIP1 | -0.03180238 | 0.021777381 | -2.8145394  | 0.004891048 | 0.010782659 | -3.25430678 | ns |
| SAA4     | -0.01998484 | 0.03625041  | -2.81421312 | 0.004895843 | 0.010782659 | -3.26841664 | ns |
| MPIG6B   | -0.05060813 | -0.16822671 | -2.81417233 | 0.004896509 | 0.010782659 | -3.26458401 | ns |
| CD28     | -0.02340843 | 0.002871527 | -2.81374802 | 0.004903113 | 0.010789066 | -3.25603858 | ns |
| LILRA6   | -0.04490543 | -0.08383911 | -2.81322131 | 0.004910965 | 0.010798205 | -3.27115607 | ns |
| PPIB     | -0.06275919 | -0.09391115 | -2.81274712 | 0.004918283 | 0.010806159 | -3.26667398 | ns |
| DGKA     | -0.03320536 | 0.034660368 | -2.81100238 | 0.004945131 | 0.010856978 | -3.2626285  | ns |
| SUGP1    | -0.02514239 | 0.04969054  | -2.80894715 | 0.004976616 | 0.010917894 | -3.28204071 | ns |
| HDAC9    | -0.0404306  | 0.087882006 | -2.80785535 | 0.004993669 | 0.010947083 | -3.27346794 | ns |
| TMPRSS5  | 0.025763932 | -0.00588975 | 2.807032337 | 0.005006393 | 0.010966743 | -3.27832048 | ns |
| KLK1     | 0.083427268 | 0.43172829  | 2.804723085 | 0.005042355 | 0.011037238 | -3.28768989 | ns |
| MAN2B2   | -0.03626642 | -0.06338169 | -2.80412947 | 0.005051544 | 0.01104907  | -3.29654295 | ns |
| ARHGEF12 | -0.06840696 | -0.03255201 | -2.80221492 | 0.005081666 | 0.011106634 | -3.29792387 | ns |
| BANK1    | -0.07011989 | -0.09860749 | -2.80106093 | 0.005099864 | 0.011138072 | -3.30113789 | ns |
| SH2B3    | -0.06424803 | -0.04187252 | -2.80072128 | 0.00510536  | 0.011141741 | -3.29238792 | ns |
| GDF2     | 0.023586085 | 0.019448341 | 2.800212978 | 0.005113289 | 0.011150712 | -3.30134742 | ns |
| PTRHD1   | -0.03690112 | -0.00351064 | -2.7992125  | 0.005129221 | 0.011177107 | -3.29791374 | ns |
| PTGR1    | 0.049815708 | 0.000851081 | 2.797155564 | 0.00516183  | 0.011239778 | -3.31596033 | ns |
| HTRA2    | -0.04023527 | 0.025624336 | -2.7956481  | 0.005185975 | 0.011283939 | -3.31799237 | ns |
| LEO1     | -0.01792081 | 0.00957895  | -2.78619058 | 0.005339622 | 0.011609602 | -3.34726398 | ns |
| GNE      | -0.04271063 | 0.031629852 | -2.78488367 | 0.005361387 | 0.011648251 | -3.33635363 | ns |
| SART1    | -0.02299437 | 0.02881335  | -2.78360321 | 0.005382589 | 0.011685621 | -3.33946947 | ns |
| FCGR3B   | -0.03243205 | -0.04711524 | -2.78256451 | 0.005399727 | 0.011714117 | -3.34957287 | ns |
| SLC16A1  | -0.03766759 | 0.072578494 | -2.77978796 | 0.005446184 | 0.01180613  | -3.351352   | ns |
| PLA2G7   | -0.0202263  | -0.01671476 | -2.77894129 | 0.005460259 | 0.011827862 | -3.36283238 | ns |
| MASP1    | -0.01510358 | -0.01695541 | -2.77501393 | 0.005526661 | 0.011962825 | -3.36904094 | ns |
| PEPD     | 0.015653178 | -0.00093538 | 2.773724994 | 0.005548486 | 0.01200117  | -3.37971886 | ns |
| TDO2     | -0.02309259 | 0.031305279 | -2.77325925 | 0.00555659  | 0.012009802 | -3.36895358 | ns |
| LACTB2   | -0.04259706 | 0.015450258 | -2.77243762 | 0.005570543 | 0.012031055 | -3.37828142 | ns |
| PIBF1    | -0.04697338 | 0.025787118 | -2.77155404 | 0.005585583 | 0.012054622 | -3.38770036 | ns |
| MESD     | -0.07916745 | -0.03171814 | -2.77014122 | 0.005609925 | 0.012098213 | -3.38710515 | ns |
| PPP1CC   | -0.05033715 | 0.042253375 | -2.76833194 | 0.005641115 | 0.0121565   | -3.39471224 | ns |
| TXNDC9   | -0.03176399 | 0.074873574 | -2.75833344 | 0.005816499 | 0.012525205 | -3.42312307 | ns |
| ANXA5    | -0.01871437 | -0.01588458 | -2.75626657 | 0.005853574 | 0.012595752 | -3.41540398 | ns |
| SCGB3A2  | 0.0537464   | 0.052983151 | 2.755260512 | 0.00587144  | 0.012624894 | -3.42767211 | ns |
| DDHD2    | -0.04026771 | 0.006013636 | -2.75205364 | 0.005929156 | 0.012739614 | -3.44124357 | ns |
| GRSF1    | -0.04871748 | 0.073775296 | -2.75155473 | 0.005938462 | 0.012750227 | -3.42304408 | ns |
| VWA1     | -0.02744498 | -0.01039964 | -2.75041755 | 0.005958841 | 0.012784582 | -3.44564937 | ns |
| ITGAL    | -0.02653386 | -0.03994738 | -2.74770236 | 0.006008598 | 0.012881868 | -3.43750373 | ns |
| STX16    | -0.03793543 | 0.08181261  | -2.74659921 | 0.006028829 | 0.012915759 | -3.4416038  | ns |

|          |             |             |             |             |             |             |    |
|----------|-------------|-------------|-------------|-------------|-------------|-------------|----|
| YWHAQ    | -0.04413864 | 0.026547805 | -2.74549252 | 0.006049141 | 0.012949774 | -3.44595404 | ns |
| FOXO1    | -0.05484705 | -0.01779692 | -2.74439568 | 0.006069289 | 0.012983388 | -3.45733185 | ns |
| HSD17B3  | -0.02876357 | 0.038744087 | -2.74355551 | 0.006084982 | 0.01299861  | -3.44948051 | ns |
| SERPING1 | -0.01123874 | -0.01211803 | -2.74352716 | 0.006085308 | 0.01299861  | -3.46205798 | ns |
| HPCAL1   | -0.04754793 | -0.10820676 | -2.7409265  | 0.006133625 | 0.013092241 | -3.47168861 | ns |
| CACNB1   | -0.03509517 | 0.082709257 | -2.73895777 | 0.006170669 | 0.01316169  | -3.46340525 | ns |
| DNAJB6   | -0.05080129 | -0.00258238 | -2.73836332 | 0.006181872 | 0.013175962 | -3.46046938 | ns |
| MMP3     | -0.03009833 | 0.007562566 | -2.73647712 | 0.006217225 | 0.013241645 | -3.47924917 | ns |
| PLA2G1B  | 0.027012197 | 0.024443962 | 2.734839636 | 0.006248171 | 0.013297857 | -3.48608369 | ns |
| ITPR1    | -0.04180001 | 0.061217129 | -2.73416091 | 0.006261247 | 0.013315981 | -3.4759688  | ns |
| GC       | -0.01525958 | 0.026826384 | -2.73340521 | 0.00627543  | 0.01333643  | -3.49125601 | ns |
| PDAP1    | -0.05820502 | -0.03326092 | -2.7329839  | 0.006283461 | 0.013343787 | -3.4923658  | ns |
| MINK1    | -0.05558478 | -0.04931503 | -2.73254984 | 0.006291737 | 0.013351652 | -3.49349856 | ns |
| FDX2     | -0.03434166 | 0.026710124 | -2.73143727 | 0.006313231 | 0.013387535 | -3.48245545 | ns |
| PIKFYVE  | -0.03317902 | 0.065213124 | -2.72999004 | 0.006340998 | 0.013436657 | -3.48572408 | ns |
| PTEN     | -0.01877194 | -0.00554402 | -2.72851813 | 0.006369335 | 0.013486917 | -3.49171264 | ns |
| SLURP1   | -0.0219793  | 0.000671023 | -2.72363326 | 0.006464106 | 0.013677674 | -3.51415048 | ns |
| DKK4     | -0.02883337 | 0.009476416 | -2.72227992 | 0.006490695 | 0.013715617 | -3.5127444  | ns |
| CD101    | -0.02555703 | -0.06271614 | -2.72223674 | 0.006491433 | 0.013715617 | -3.52044623 | ns |
| STAT2    | -0.04614663 | 0.025058675 | -2.72131844 | 0.006509693 | 0.0137267   | -3.50921824 | ns |
| IMPACT   | -0.03387138 | -0.00900124 | -2.72128952 | 0.006510038 | 0.0137267   | -3.52402609 | ns |
| DDX58    | -0.03701651 | 0.063343732 | -2.72126302 | 0.006510781 | 0.0137267   | -3.51045677 | ns |
| MYBPC2   | -0.0487098  | 0.18236127  | -2.71912984 | 0.006552881 | 0.013805493 | -3.51670836 | ns |
| DOK2     | -0.07813123 | -0.04117119 | -2.717032   | 0.006594428 | 0.013883007 | -3.52945905 | ns |
| CDC26    | -0.0419855  | 0.044959505 | -2.71610521 | 0.006612851 | 0.013911762 | -3.53576508 | ns |
| PSMD9    | -0.03656224 | 0.050005513 | -2.71174265 | 0.006700529 | 0.014086066 | -3.54343317 | ns |
| MED18    | -0.04870428 | -0.01869304 | -2.70834513 | 0.006769613 | 0.014221058 | -3.54531672 | ns |
| C2orf69  | -0.03377553 | 0.071056661 | -2.70520789 | 0.006833816 | 0.014345609 | -3.55424793 | ns |
| SFTPA1   | -0.03565407 | 0.089518938 | -2.70283038 | 0.0068829   | 0.014438268 | -3.56014824 | ns |
| SUSD5    | -0.01989229 | -0.0123051  | -2.70177171 | 0.006904843 | 0.014473899 | -3.56133225 | ns |
| GOPC     | -0.06433811 | -0.06497915 | -2.70029798 | 0.006935338 | 0.014527395 | -3.57667773 | ns |
| PNLIP    | 0.035317857 | 0.042523442 | 2.697944632 | 0.006984467 | 0.014619815 | -3.58583313 | ns |
| ADAMTS16 | -0.01987687 | 0.003784119 | -2.69611957 | 0.007023041 | 0.014690029 | -3.578907   | ns |
| PLCB2    | -0.05728055 | -0.04359001 | -2.69324512 | 0.007083634 | 0.014806164 | -3.59950904 | ns |
| RCOR1    | -0.02809543 | 0.070401337 | -2.69219419 | 0.007106205 | 0.014842717 | -3.58941957 | ns |
| SORT1    | -0.02328806 | -0.00768881 | -2.69074372 | 0.007137045 | 0.014891698 | -3.59961419 | ns |
| MICALL2  | -0.04215297 | 0.130576645 | -2.69061638 | 0.007139855 | 0.014891698 | -3.59337982 | ns |
| RAPGEF2  | -0.0311609  | 0.06697825  | -2.68949092 | 0.007163885 | 0.014931153 | -3.60176393 | ns |
| ATXN3    | -0.0372506  | 0.011150893 | -2.68614987 | 0.007235768 | 0.015070215 | -3.61848243 | ns |
| EPO      | -0.04747706 | 0.072446807 | -2.68577199 | 0.00724403  | 0.01507667  | -3.61556793 | ns |
| AP3S2    | -0.02793665 | 0.074404045 | -2.68531179 | 0.00725393  | 0.015086521 | -3.62072023 | ns |
| VCAM1    | -0.01654446 | 0.000291885 | -2.68469137 | 0.007267488 | 0.015103961 | -3.61704962 | ns |
| DNAJC6   | -0.04945618 | 0.033372294 | -2.68414479 | 0.007279505 | 0.015110464 | -3.6106615  | ns |
| DSG3     | -0.02094518 | -0.00361557 | -2.68406879 | 0.007280967 | 0.015110464 | -3.62347246 | ns |
| EVI5     | -0.05287477 | -0.00236064 | -2.6833871  | 0.007296034 | 0.015130981 | -3.61110866 | ns |
| RILP     | -0.03838656 | -0.00541491 | -2.68049968 | 0.007359018 | 0.015250769 | -3.6338922  | ns |
| DNAJC9   | -0.04540181 | -0.0158368  | -2.67492768 | 0.007482402 | 0.01549372  | -3.64737129 | ns |
| FOLH1    | -0.06417263 | 0.318674446 | -2.67473781 | 0.007486863 | 0.01549372  | -3.63414217 | ns |
| CA3      | -0.03857155 | 0.016364658 | -2.6689208  | 0.007617471 | 0.015752844 | -3.66381449 | ns |
| FCRLB    | -0.03688673 | 0.046436327 | -2.66768578 | 0.007645747 | 0.015800128 | -3.65395758 | ns |
| BOLA1    | -0.03167913 | 0.01293374  | -2.66126619 | 0.007792987 | 0.016082899 | -3.67193121 | ns |
| AGR3     | -0.0373084  | 0.008485074 | -2.6612414  | 0.007793596 | 0.016082899 | -3.67026174 | ns |
| HLA-A    | -0.01887302 | -0.03275361 | -2.65977787 | 0.007827251 | 0.01613899  | -3.68948734 | ns |
| SNAPIN   | -0.03368517 | 0.020923945 | -2.65958071 | 0.007831832 | 0.01613899  | -3.69000871 | ns |
| DCTN2    | -0.05664067 | 0.080828497 | -2.65850739 | 0.007856929 | 0.016179289 | -3.68553671 | ns |
| TTR      | 0.014062232 | -0.00211707 | 2.657336236 | 0.007884258 | 0.016224126 | -3.68907164 | ns |
| NPTXR    | 0.021333368 | 0.046595402 | 2.656684469 | 0.007899511 | 0.016244065 | -3.69065219 | ns |
| NFX1     | -0.03980149 | 0.063418784 | -2.65531773 | 0.007931727 | 0.016298834 | -3.68624935 | ns |
| FGF9     | 0.023154958 | -0.02044946 | 2.653990067 | 0.007963014 | 0.016351618 | -3.68668795 | ns |
| YOD1     | -0.03729518 | 0.005495756 | -2.6535053  | 0.00797443  | 0.016363552 | -3.69103161 | ns |
| C1QTNF1  | -0.02620222 | -0.00940625 | -2.65325839 | 0.007980089 | 0.016363665 | -3.7009578  | ns |
| ARL13B   | -0.04098572 | 0.079931612 | -2.65257179 | 0.007996504 | 0.016385819 | -3.69349348 | ns |
| ICA1     | -0.0494176  | 0.050665138 | -2.64884674 | 0.008085095 | 0.016555734 | -3.70496437 | ns |
| BIRC2    | -0.03996741 | 0.039239979 | -2.64577131 | 0.008158967 | 0.016695293 | -3.71183163 | ns |
| CABP2    | -0.03855623 | 0.107420937 | -2.64546687 | 0.008166268 | 0.016698531 | -3.71312363 | ns |
| AKT1S1   | -0.04122965 | -0.02756892 | -2.64515157 | 0.008173904 | 0.01670245  | -3.71437094 | ns |

|             |             |             |             |             |             |             |    |
|-------------|-------------|-------------|-------------|-------------|-------------|-------------|----|
| TRIM25      | -0.06322365 | -0.00986909 | -2.64411067 | 0.008198856 | 0.016741719 | -3.72885427 | ns |
| STK4        | -0.05394471 | -0.01258294 | -2.63771719 | 0.008355054 | 0.017048747 | -3.74056825 | ns |
| KLK11       | -0.01798081 | -0.0091138  | -2.63639104 | 0.00838776  | 0.017103534 | -3.7440226  | ns |
| SEPTIN9     | -0.01773497 | 0.026481088 | -2.63456566 | 0.008432987 | 0.017183755 | -3.74852795 | ns |
| TGFB1       | -0.01648829 | -0.01174741 | -2.63310592 | 0.008469374 | 0.017245866 | -3.74845163 | ns |
| GTPBP2      | -0.04652986 | 0.035633194 | -2.63193255 | 0.008498697 | 0.017293515 | -3.74862445 | ns |
| KLK10       | -0.02402453 | -0.01359044 | -2.62412794 | 0.008695686 | 0.017682035 | -3.77901347 | ns |
| TSC1        | -0.04370965 | 0.165846253 | -2.61979885 | 0.008807003 | 0.017895929 | -3.7787128  | ns |
| NUB1        | -0.05128989 | 0.044894868 | -2.6167045  | 0.008887019 | 0.018045964 | -3.79761398 | ns |
| IRAK4       | -0.06426503 | -0.12338317 | -2.61495821 | 0.008932564 | 0.018125842 | -3.8021554  | ns |
| IGDCC4      | 0.014701857 | 0.023081224 | 2.608559658 | 0.009101151 | 0.018455112 | -3.82231401 | ns |
| BOLA2_BOLA2 | -0.03194818 | -0.02938422 | -2.60795426 | 0.00911749  | 0.018475414 | -3.81106683 | ns |
| HSPB1       | -0.04241837 | -0.14338851 | -2.60709591 | 0.009140381 | 0.018508954 | -3.81278934 | ns |
| GRAP2       | -0.07851438 | -0.10292451 | -2.60245367 | 0.009264851 | 0.018748    | -3.83242128 | ns |
| CD69        | -0.0534436  | -0.07174419 | -2.60192356 | 0.009279232 | 0.018764098 | -3.83053357 | ns |
| CNTN2       | 0.027342434 | 0.041309625 | 2.601357405 | 0.009294378 | 0.018781719 | -3.84301714 | ns |
| HMCN2       | -0.03209004 | -0.04793224 | -2.60012954 | 0.009327925 | 0.018836473 | -3.83123012 | ns |
| GABARAPL1   | -0.03888991 | 0.151129101 | -2.59892082 | 0.009360726 | 0.018889647 | -3.83984227 | ns |
| ELAC1       | -0.04844376 | -0.03533095 | -2.59644418 | 0.009428298 | 0.019012867 | -3.85497539 | ns |
| CTRC        | 0.037606757 | 0.04297903  | 2.594561342 | 0.009480189 | 0.019104315 | -3.85298869 | ns |
| HPGDS       | 0.022294097 | 0.012222108 | 2.593479962 | 0.009510211 | 0.019151597 | -3.84800136 | ns |
| DIABLO      | -0.06666729 | -0.02743327 | -2.58948851 | 0.009621    | 0.019361351 | -3.86371015 | ns |
| GOT1        | -0.02270915 | 0.016197126 | -2.589203   | 0.009628836 | 0.019363776 | -3.87232927 | ns |
| OTUD6B      | -0.03321264 | 0.022561018 | -2.58839255 | 0.009651525 | 0.019396045 | -3.8737834  | ns |
| SH2D1A      | -0.03371824 | 0.05250215  | -2.58451735 | 0.009760686 | 0.019601929 | -3.88083334 | ns |
| NAMPT       | -0.03232523 | 0.040595742 | -2.58411473 | 0.009772267 | 0.019611698 | -3.87210224 | ns |
| SPRING1     | -0.03521366 | 0.102760336 | -2.58089029 | 0.009863983 | 0.019782164 | -3.87824771 | ns |
| PMVK        | -0.06675254 | -0.30859416 | -2.57626528 | 0.009996852 | 0.020034871 | -3.89173651 | ns |
| TRIM5       | -0.05196631 | -0.00204847 | -2.57483393 | 0.010038105 | 0.020103748 | -3.90566828 | ns |
| PLXNB2      | -0.01383449 | -0.01441118 | -2.57457493 | 0.010045575 | 0.02010492  | -3.9077618  | ns |
| TP53        | -0.02591365 | -0.00850661 | -2.57431422 | 0.010053377 | 0.020106754 | -3.89723    | ns |
| CD163       | -0.02629097 | -0.02174901 | -2.57390122 | 0.010065188 | 0.020116598 | -3.90715465 | ns |
| ADAM23      | -0.02087321 | -0.03862747 | -2.57055898 | 0.010162683 | 0.02029756  | -3.92152759 | ns |
| RBP1        | -0.03976598 | 0.140594665 | -2.56880852 | 0.010214391 | 0.020386892 | -3.9117972  | ns |
| SNX2        | -0.04624227 | 0.062905844 | -2.56651471 | 0.010281961 | 0.020507737 | -3.92991979 | ns |
| NUMB        | -0.04731915 | -0.0424034  | -2.56353715 | 0.010370796 | 0.020670802 | -3.92365748 | ns |
| CELA3A      | 0.033522862 | 0.035984228 | 2.562644146 | 0.010397216 | 0.020709324 | -3.94019917 | ns |
| FOXO3       | -0.05808133 | 0.111166139 | -2.5619375  | 0.010418658 | 0.020737889 | -3.92882665 | ns |
| SNAP25      | -0.02556252 | 0.03154438  | -2.55758091 | 0.010549997 | 0.020985007 | -3.94088642 | ns |
| ZBTB16      | -0.04299515 | 0.114089428 | -2.55356855 | 0.010672303 | 0.021203037 | -3.95010561 | ns |
| GSR         | -0.01243748 | -0.00752614 | -2.553502   | 0.010674132 | 0.021203037 | -3.95957471 | ns |
| MITD1       | -0.05894267 | -0.07896957 | -2.54989684 | 0.010785161 | 0.021409021 | -3.96601101 | ns |
| LRP2BP      | -0.04643005 | 0.218250407 | -2.54455482 | 0.010951571 | 0.021724584 | -3.9734395  | ns |
| MERTK       | -0.01488615 | -0.01656015 | -2.54181782 | 0.011037395 | 0.021879969 | -3.99457354 | ns |
| CLTA        | -0.02710444 | 0.04076626  | -2.5390782  | 0.011124467 | 0.022037615 | -3.98753948 | ns |
| FADD        | -0.04510799 | -0.00390822 | -2.53683458 | 0.011195824 | 0.022163936 | -4.00005565 | ns |
| TCN2        | -0.01760092 | -0.01894231 | -2.53079089 | 0.011390386 | 0.022533827 | -4.02072304 | ns |
| PLA2G10     | 0.035743626 | 0.023106515 | 2.527993323 | 0.01148165  | 0.022698996 | -4.02129839 | ns |
| CD86        | -0.01564367 | -0.00165069 | -2.52670437 | 0.011523727 | 0.022766769 | -4.03064409 | ns |
| ARF6        | -0.05882387 | -0.07728748 | -2.51783354 | 0.011817928 | 0.023332218 | -4.05288996 | ns |
| PVR         | -0.02089307 | -0.01870719 | -2.51526981 | 0.011904157 | 0.023486581 | -4.06128348 | ns |
| BLVRB       | -0.04010432 | 0.066930919 | -2.51323026 | 0.011973267 | 0.023600564 | -4.06182829 | ns |
| KRT14       | -0.01641898 | 0.012872668 | -2.51310423 | 0.011978095 | 0.023600564 | -4.03766196 | ns |
| DYNLT3      | -0.02393362 | 0.022529993 | -2.51139926 | 0.012035478 | 0.023697638 | -4.0690495  | ns |
| NEXN        | -0.03819434 | 0.069892856 | -2.51049014 | 0.012066481 | 0.023742672 | -4.07118221 | ns |
| MYCBP2      | -0.03714351 | 0.084376171 | -2.50969126 | 0.012093771 | 0.023780344 | -4.07518966 | ns |
| CNTNAP4     | -0.0580016  | 0.363790031 | -2.50360918 | 0.012303832 | 0.024177113 | -4.07617966 | ns |
| KLK14       | -0.02693254 | 0.00705239  | -2.50328298 | 0.012314901 | 0.02418259  | -4.09189923 | ns |
| MRPL46      | -0.01551873 | 0.007839907 | -2.50193699 | 0.012362105 | 0.024251391 | -4.08075963 | ns |
| RWDD1       | -0.03765151 | -0.00280278 | -2.50180118 | 0.012366549 | 0.024251391 | -4.09487651 | ns |
| NGRN        | -0.01210672 | 0.010941475 | -2.49589638 | 0.012574239 | 0.024642133 | -4.10859125 | ns |
| NAGK        | -0.03107768 | 0.008383735 | -2.49534661 | 0.012594041 | 0.024664386 | -4.09563634 | ns |
| CDTD        | -0.05159717 | -0.05431009 | -2.49309692 | 0.01267402  | 0.024804382 | -4.10313528 | ns |
| CD93        | -0.01738123 | -0.00281538 | -2.48650002 | 0.012911659 | 0.025247339 | -4.10653876 | ns |
| DPEP1       | 0.028770517 | -0.05640025 | 2.486324688 | 0.012917645 | 0.025247339 | -4.12402119 | ns |
| IGFBP3      | 0.015862221 | -0.00385257 | 2.484555071 | 0.012981919 | 0.025355989 | -4.13182009 | ns |

|          |             |              |             |             |             |             |    |
|----------|-------------|--------------|-------------|-------------|-------------|-------------|----|
| TWF2     | -0.0457368  | 0.016038867  | -2.48317901 | 0.013032068 | 0.025436925 | -4.13967957 | ns |
| USO1     | -0.05283086 | -0.04736892  | -2.48241893 | 0.013060019 | 0.025474453 | -4.13552398 | ns |
| NFAT5    | -0.04746163 | -0.141869548 | -2.47181024 | 0.013454075 | 0.026225566 | -4.15322863 | ns |
| ITGB1BP2 | -0.06431451 | -0.09242788  | -2.46998232 | 0.013522967 | 0.026342271 | -4.1595722  | ns |
| NCK2     | -0.06121248 | -0.03250535  | -2.46572146 | 0.01368457  | 0.026639296 | -4.18020941 | ns |
| PDE5A    | -0.0562905  | -0.10372039  | -2.46542017 | 0.013696272 | 0.026644314 | -4.17134984 | ns |
| SARG     | -0.05945507 | -0.06807593  | -2.46347569 | 0.013770565 | 0.026760008 | -4.18637341 | ns |
| IGDCC3   | -0.02574476 | 0.07706132   | -2.46339064 | 0.013774072 | 0.026760008 | -4.17595621 | ns |
| FASLG    | 0.021510782 | 0.042671887  | 2.461230289 | 0.013856938 | 0.026903098 | -4.19501118 | ns |
| CFHR4    | -0.0388659  | -0.10948649  | -2.45945187 | 0.013925802 | 0.027018832 | -4.19757011 | ns |
| IL17RB   | 0.031167705 | 0.021288541  | 2.453516823 | 0.014157855 | 0.027450821 | -4.20344269 | ns |
| M6PR     | -0.02135104 | 0.065963534  | -2.45082251 | 0.014264296 | 0.027638849 | -4.20616693 | ns |
| CD5L     | -0.02460669 | 0.013826106  | -2.44762373 | 0.014391268 | 0.027866382 | -4.22374629 | ns |
| PBK      | 0.016289112 | -0.00099361  | 2.444327163 | 0.014523674 | 0.028104128 | -4.21934218 | ns |
| ATXN10   | -0.04097937 | -0.02471162  | -2.44327802 | 0.014565917 | 0.028167204 | -4.22494717 | ns |
| PDGFB    | -0.04919599 | -0.07750377  | -2.44210727 | 0.014612965 | 0.028239482 | -4.23782318 | ns |
| TBC1D23  | -0.0523934  | 0.017106392  | -2.4406993  | 0.014670119 | 0.028331182 | -4.23762369 | ns |
| MANF     | -0.06909349 | -0.25297915  | -2.44023213 | 0.014689012 | 0.028347485 | -4.24237439 | ns |
| BDNF     | -0.04383169 | -0.09279052  | -2.44001045 | 0.014697977 | 0.028347485 | -4.24533441 | ns |
| CSPG4    | 0.017404839 | 0.004740762  | 2.434308901 | 0.01493148  | 0.028749867 | -4.2591505  | ns |
| KLB      | 0.042390438 | 0.004789808  | 2.434307701 | 0.014931839 | 0.028749867 | -4.24669548 | ns |
| MAP2K6   | -0.05776937 | -0.04439432  | -2.43419822 | 0.014936147 | 0.028749867 | -4.25585503 | ns |
| EREG     | -0.04575    | 0.055358132  | -2.4332493  | 0.014975417 | 0.028806468 | -4.25381527 | ns |
| NRGN     | -0.04795233 | -0.02731205  | -2.4322633  | 0.015016052 | 0.028865617 | -4.26340067 | ns |
| UHRF2    | 0.01854766  | 0.026746076  | 2.429707715 | 0.015122634 | 0.029051376 | -4.25646868 | ns |
| DAPP1    | -0.06931286 | -0.27996901  | -2.42867943 | 0.015165334 | 0.029114252 | -4.26919631 | ns |
| PF4      | -0.0510494  | -0.05642136  | -2.42550363 | 0.015298602 | 0.029342259 | -4.27696145 | ns |
| FLT1     | -0.01206034 | -0.00074714  | -2.42537267 | 0.015304199 | 0.029342259 | -4.27372082 | ns |
| VCAN     | 0.016880282 | 0.00580492   | 2.42371202  | 0.015374146 | 0.029457025 | -4.28609242 | ns |
| AAMDC    | -0.02810771 | 0.012003783  | -2.42094483 | 0.015491956 | 0.029663285 | -4.27851795 | ns |
| CXCL5    | -0.0652918  | -0.08330736  | -2.41871089 | 0.015587246 | 0.029826185 | -4.28913854 | ns |
| ST13     | -0.03003378 | -0.0014959   | -2.4181961  | 0.015609388 | 0.029848993 | -4.28598565 | ns |
| SLC27A4  | -0.03810354 | 0.076762618  | -2.41486598 | 0.01575283  | 0.030103576 | -4.29355711 | ns |
| GP6      | -0.05013657 | -0.0482244   | -2.4074102  | 0.016077851 | 0.030704595 | -4.31974149 | ns |
| CASP7    | -0.04395167 | -0.01620743  | -2.40712792 | 0.016090152 | 0.030708003 | -4.3249634  | ns |
| IST1     | -0.05198404 | -0.02995086  | -2.4049602  | 0.016185989 | 0.030852334 | -4.32523833 | ns |
| CTSV     | 0.022835498 | 0.03414461   | 2.404937477 | 0.016186909 | 0.030852334 | -4.32989392 | ns |
| OXCT1    | -0.03593393 | 0.010908425  | -2.40275013 | 0.016284309 | 0.031017732 | -4.32214334 | ns |
| DFFA     | -0.03794665 | 0.024625016  | -2.40164306 | 0.016333299 | 0.031090764 | -4.33906762 | ns |
| LZTFL1   | -0.03727396 | 0.015091715  | -2.39865506 | 0.016467425 | 0.031325655 | -4.33277325 | ns |
| NIN1J1   | -0.03205797 | 0.09235126   | -2.39340665 | 0.016704909 | 0.031756727 | -4.34392935 | ns |
| NUBP1    | -0.05248085 | 0.132931119  | -2.38668198 | 0.01701315  | 0.032321664 | -4.37273664 | ns |
| PTPRH    | -0.02486804 | 0.034601966  | -2.38621727 | 0.017034647 | 0.032341462 | -4.37376626 | ns |
| SERPINF2 | -0.00710819 | 0.00282687   | -2.38292419 | 0.017187959 | 0.032611332 | -4.3727757  | ns |
| PADI4    | -0.04118955 | 0.078538967  | -2.37752451 | 0.017441708 | 0.03307129  | -4.38183617 | ns |
| FHIT     | -0.04118186 | -0.02496578  | -2.37489694 | 0.017566294 | 0.033285905 | -4.38871762 | ns |
| PODXL2   | -0.01491543 | 0.013059613  | -2.37103702 | 0.017750459 | 0.033610466 | -4.40855576 | ns |
| BRAP     | -0.05671827 | -0.07880488  | -2.37082777 | 0.017760599 | 0.033610466 | -4.40558255 | ns |
| CPVL     | -0.02277218 | -0.04548448  | -2.37048292 | 0.017777039 | 0.033619788 | -4.41246541 | ns |
| BLOC1S3  | -0.02121751 | 0.066570655  | -2.36638118 | 0.017975164 | 0.033972477 | -4.42166151 | ns |
| TRAF3    | -0.01935923 | 0.046941262  | -2.36547187 | 0.018019728 | 0.034034673 | -4.40890855 | ns |
| PAGR1    | -0.02201637 | 0.030777056  | -2.36472407 | 0.018056101 | 0.034081328 | -4.41225649 | ns |
| CCL8     | -0.03391489 | -0.08009675  | -2.36331958 | 0.018124314 | 0.034187982 | -4.43001288 | ns |
| MAX      | -0.05813129 | -0.00364015  | -2.3537253  | 0.018599111 | 0.035060945 | -4.4384813  | ns |
| ARHGAP25 | -0.03291428 | 0.061211885  | -2.34912747 | 0.018830327 | 0.035473906 | -4.4483118  | ns |
| CD84     | -0.01718139 | -0.00421392  | -2.34765984 | 0.018904398 | 0.035590485 | -4.46157268 | ns |
| SNX9     | -0.03760511 | 0.030647864  | -2.34132617 | 0.01922813  | 0.036176636 | -4.4741555  | ns |
| FKBP14   | -0.05084468 | -0.03884897  | -2.33960633 | 0.019316683 | 0.036319842 | -4.48523469 | ns |
| SLA2     | -0.05318465 | -0.03263214  | -2.33865891 | 0.019365715 | 0.036388602 | -4.48743826 | ns |
| CCL13    | -0.03770735 | -0.01076245  | -2.33689648 | 0.019457233 | 0.036537054 | -4.49083866 | ns |
| NMI      | -0.03660528 | 0.040922428  | -2.33580661 | 0.019514101 | 0.036620293 | -4.48985157 | ns |
| TYMP     | -0.03629981 | -0.02481184  | -2.33245839 | 0.019689573 | 0.036925853 | -4.49216731 | ns |
| IFIT1    | -0.02661498 | 0.039074776  | -2.32900383 | 0.019871844 | 0.037236119 | -4.50103783 | ns |
| COL24A1  | -0.02775083 | -0.059644221 | -2.32883708 | 0.019880517 | 0.037236119 | -4.50827012 | ns |
| ADAMTS13 | 0.012242931 | 0.008123303  | 2.325686991 | 0.020048081 | 0.037525895 | -4.51698201 | ns |
| MYOM1    | -0.0235227  | 0.053938588  | -2.31959409 | 0.020376135 | 0.038115511 | -4.51783112 | ns |

|          |             |             |             |             |             |             |    |
|----------|-------------|-------------|-------------|-------------|-------------|-------------|----|
| LCN15    | -0.03033402 | 0.050378763 | -2.31820493 | 0.020451115 | 0.038231277 | -4.53479385 | ns |
| ELAVL4   | -0.04274085 | 0.071513876 | -2.31567451 | 0.020589396 | 0.038465155 | -4.5268623  | ns |
| ALDH5A1  | -0.02342845 | 0.044616667 | -2.31478106 | 0.020637897 | 0.038531112 | -4.54268028 | ns |
| F2       | -0.00751319 | -0.00502788 | -2.31315313 | 0.02072725  | 0.038673207 | -4.54557706 | ns |
| FKBP5    | -0.05176491 | -0.06021899 | -2.31256285 | 0.020759915 | 0.038709419 | -4.5396779  | ns |
| IFNAR1   | -0.0129086  | 0.02396281  | -2.3103262  | 0.020883198 | 0.038914447 | -4.55096323 | ns |
| CSF2RA   | -0.03344185 | -0.05182923 | -2.30419065 | 0.0212253   | 0.039526707 | -4.55889277 | ns |
| EIF5A    | -0.01624918 | 0.008168778 | -2.30371794 | 0.021251991 | 0.039538783 | -4.55457521 | ns |
| GCLM     | -0.02301701 | 0.058291975 | -2.30359676 | 0.021258866 | 0.039538783 | -4.55317923 | ns |
| JPT2     | -0.04394205 | -0.03595741 | -2.30057155 | 0.021429104 | 0.039830035 | -4.57332418 | ns |
| PDCD1LG2 | -0.01654187 | -0.01851512 | -2.29993241 | 0.021465446 | 0.039872202 | -4.56935999 | ns |
| PAIP2B   | -0.02674294 | 0.038378239 | -2.29801414 | 0.021574689 | 0.040049646 | -4.56285153 | ns |
| CETN3    | -0.03866812 | 0.020868665 | -2.29302561 | 0.021859887 | 0.040553285 | -4.59055715 | ns |
| ATP6V1F  | -0.03593439 | 0.046970394 | -2.29250496 | 0.02189027  | 0.040577812 | -4.57871587 | ns |
| CCDC50   | -0.03861297 | 0.154310522 | -2.29231306 | 0.021900901 | 0.040577812 | -4.59414323 | ns |
| ARAF     | -0.0336298  | 0.068298952 | -2.29159496 | 0.021942577 | 0.040629248 | -4.58696489 | ns |
| BNIP2    | -0.01703686 | 0.009900216 | -2.29086439 | 0.021984626 | 0.040681311 | -4.59655921 | ns |
| GP5      | -0.01799083 | -0.03932689 | -2.28832015 | 0.022132593 | 0.040929178 | -4.58983321 | ns |
| BLOC1S2  | -0.03674302 | 0.087829121 | -2.28702381 | 0.022208224 | 0.041043046 | -4.59241337 | ns |
| VASP     | -0.03593506 | 0.021510264 | -2.28528352 | 0.022309668 | 0.041204447 | -4.60811505 | ns |
| TMEM106A | -0.03472484 | 0.019383319 | -2.28253366 | 0.022471378 | 0.04147688  | -4.61449721 | ns |
| PSTPIP2  | -0.05402673 | -0.0979737  | -2.27850345 | 0.022710984 | 0.041892655 | -4.59460801 | ns |
| CSF2RB   | -0.02139275 | -0.04826485 | -2.27518385 | 0.022908915 | 0.042231081 | -4.6171793  | ns |
| CXCL1    | -0.05131002 | 0.068295683 | -2.27411636 | 0.022972768 | 0.042322071 | -4.62837441 | ns |
| ENDOU    | -0.02578836 | 0.032050028 | -2.27319082 | 0.023029369 | 0.042399595 | -4.6022196  | ns |
| ATP2B4   | -0.03107062 | 0.152626899 | -2.27234655 | 0.023079646 | 0.042465386 | -4.62426132 | ns |
| EIF4B    | -0.03031332 | -0.04025364 | -2.27069305 | 0.023179431 | 0.042611065 | -4.63507565 | ns |
| SSH3     | -0.0148013  | 0.020138762 | -2.27042147 | 0.02319612  | 0.042611065 | -4.62689188 | ns |
| APP      | -0.03511599 | 0.003109772 | -2.27030937 | 0.0232026   | 0.042611065 | -4.63950101 | ns |
| EIF2AK3  | -0.03370506 | 0.105939308 | -2.26984653 | 0.023230993 | 0.042636393 | -4.62990597 | ns |
| HMOX1    | 0.024602347 | 0.017567842 | 2.268226653 | 0.023329447 | 0.042790192 | -4.63562675 | ns |
| PNMA1    | -0.02753856 | 0.061157013 | -2.26477849 | 0.023540408 | 0.043150026 | -4.64225542 | ns |
| CASP10   | -0.03845685 | -0.00639692 | -2.26333754 | 0.023629053 | 0.043285342 | -4.64592781 | ns |
| OSMR     | -0.01068526 | -0.01526847 | -2.25896353 | 0.023899589 | 0.043753479 | -4.66514578 | ns |
| TPSD1    | -0.01805182 | 0.031378876 | -2.25770539 | 0.023977865 | 0.043869276 | -4.6724307  | ns |
| IL36G    | -0.03316646 | 0.077347882 | -2.25442437 | 0.02418388  | 0.04421849  | -4.66210165 | ns |
| BTC      | -0.03951537 | 0.089865594 | -2.25066528 | 0.024421127 | 0.044624338 | -4.67344257 | ns |
| STAT5B   | -0.07287735 | -0.04174943 | -2.24718965 | 0.024642103 | 0.044999964 | -4.68858537 | ns |
| MUC2     | 0.04512831  | 0.023005902 | 2.244778645 | 0.024796406 | 0.045253441 | -4.70004145 | ns |
| FAM3D    | -0.04103893 | 0.096593424 | -2.24429121 | 0.024827756 | 0.045282353 | -4.70049124 | ns |
| CLEC4C   | -0.02435637 | -0.00674288 | -2.24094297 | 0.025044014 | 0.045648265 | -4.70501302 | ns |
| PCDH17   | -0.01790397 | 0.01419953  | -2.23519193 | 0.025419115 | 0.046303067 | -4.71562347 | ns |
| IL3RA    | -0.01631958 | -0.01526634 | -2.23356847 | 0.025526062 | 0.046468891 | -4.71279419 | ns |
| TIA1     | -0.06294741 | 0.008295272 | -2.23288854 | 0.025571059 | 0.046521802 | -4.70915484 | ns |
| PRDX5    | -0.03586405 | -0.12997699 | -2.23207166 | 0.02562443  | 0.046589873 | -4.72971373 | ns |
| TARS1    | -0.01801008 | 0.01433718  | -2.22844785 | 0.025864997 | 0.046998004 | -4.73579531 | ns |
| CRTAP    | -0.02464223 | 0.062242733 | -2.22762585 | 0.025920137 | 0.047068906 | -4.72522976 | ns |
| DXO      | -0.02213633 | 0.016189572 | -2.22538767 | 0.026069556 | 0.047310816 | -4.74353003 | ns |
| PKD1     | 0.012431363 | -0.01444359 | 2.225018015 | 0.026094376 | 0.047326447 | -4.74439477 | ns |
| TNC      | -0.02464221 | 0.00349746  | -2.22218169 | 0.026285546 | 0.047633083 | -4.74573205 | ns |
| HGS      | -0.04054273 | 0.049616302 | -2.22203036 | 0.026296072 | 0.047633083 | -4.73710758 | ns |
| LUZP2    | -0.0209598  | 0.030133536 | -2.22085144 | 0.026375469 | 0.047747285 | -4.75259895 | ns |
| CRKL     | -0.05591677 | -0.08170865 | -2.21931458 | 0.026479883 | 0.04789699  | -4.75239187 | ns |
| MAP4K5   | -0.05868368 | -0.05973833 | -2.21915329 | 0.026490972 | 0.04789699  | -4.74896679 | ns |
| MRPL28   | -0.01772872 | 0.041628354 | -2.21822082 | 0.026554195 | 0.047954877 | -4.76029691 | ns |
| SLAMF1   | -0.03071969 | -0.07847509 | -2.21820261 | 0.026555834 | 0.047954877 | -4.74679843 | ns |
| WNT9A    | -0.01443615 | -0.0054908  | -2.21748704 | 0.026604652 | 0.048013339 | -4.74837625 | ns |
| IFNL2    | -0.03001743 | 0.110522125 | -2.21450259 | 0.026809121 | 0.048352461 | -4.75469289 | ns |
| KLK6     | -0.01516026 | -0.00094985 | -2.21183795 | 0.026992481 | 0.048653114 | -4.77024189 | ns |
| SCGB2A2  | 0.014946885 | 0.01818387  | 2.207945707 | 0.027263099 | 0.04911058  | -4.76768823 | ns |
| SMAD2    | -0.03312094 | 0.062553313 | -2.20008667 | 0.027815496 | 0.050074752 | -4.79823909 | ns |
| NFATC1   | -0.05022548 | 0.017820846 | -2.19821455 | 0.027948699 | 0.05028355  | -4.79931181 | ns |
| SEC31A   | -0.03716077 | -0.07002778 | -2.19774257 | 0.027982605 | 0.050308169 | -4.79096082 | ns |
| GIMAP8   | -0.02454475 | 0.021448399 | -2.19754378 | 0.02799684  | 0.050308169 | -4.78874807 | ns |
| LAIR2    | -0.05403997 | -0.13744056 | -2.19564936 | 0.028132039 | 0.050520021 | -4.80169935 | ns |
| CASP2    | -0.03471784 | 0.02706732  | -2.19262776 | 0.02834917  | 0.050878659 | -4.81150737 | ns |

|          |             |             |             |             |             |             |    |
|----------|-------------|-------------|-------------|-------------|-------------|-------------|----|
| TBCC     | -0.04215033 | -0.01503337 | -2.19180279 | 0.028408795 | 0.05095435  | -4.81008935 | ns |
| CRTAM    | -0.02569355 | -0.01534863 | -2.19110218 | 0.028459456 | 0.05101388  | -4.81161592 | ns |
| MRPS16   | -0.01404592 | 0.03521769  | -2.18888758 | 0.028620337 | 0.051270787 | -4.80867263 | ns |
| CETN2    | -0.03470736 | 0.059669333 | -2.18839652 | 0.02865603  | 0.051303255 | -4.81176827 | ns |
| FCGR2B   | -0.02960837 | 0.025043393 | -2.18537347 | 0.028876845 | 0.051666903 | -4.81741917 | ns |
| LRTM2    | 0.012908241 | 0.040097765 | 2.182895901 | 0.029058407 | 0.051959919 | -4.83759349 | ns |
| SIRT1    | -0.04244505 | 0.197516286 | -2.18203676 | 0.029122247 | 0.052042204 | -4.82355775 | ns |
| PCSK7    | -0.02173745 | 0.031842952 | -2.17997468 | 0.029274381 | 0.052282074 | -4.84203595 | ns |
| XRCC4    | -0.01858711 | 0.008474459 | -2.17279395 | 0.029811359 | 0.053208538 | -4.84559411 | ns |
| RRM2B    | -0.03444512 | 0.014017249 | -2.17153805 | 0.0299061   | 0.053345029 | -4.84738415 | ns |
| STX7     | -0.02452408 | -0.01084607 | -2.1673501  | 0.030223814 | 0.053878839 | -4.85531106 | ns |
| COX5B    | -0.03515545 | 0.011783154 | -2.16307323 | 0.030550986 | 0.054425278 | -4.87301179 | ns |
| FKBPL    | -0.02794196 | 0.027985797 | -2.16285485 | 0.030567622 | 0.054425278 | -4.87892691 | ns |
| FKBP7    | -0.02385922 | 0.046984911 | -2.16214687 | 0.030622582 | 0.054489908 | -4.86737617 | ns |
| NXPH3    | 0.014346223 | 0.00862956  | 2.158803814 | 0.030881161 | 0.05491656  | -4.87368992 | ns |
| CD244    | -0.01358557 | -0.00300112 | -2.15794661 | 0.030947262 | 0.055000611 | -4.89150258 | ns |
| ALDH2    | -0.02472038 | 0.109272298 | -2.1561606  | 0.031086512 | 0.055214486 | -4.89337494 | ns |
| TIMP4    | -0.01933041 | -0.00530411 | -2.15495498 | 0.031180841 | 0.055348362 | -4.89328527 | ns |
| AARSD1   | -0.02876522 | 0.006943245 | -2.15385163 | 0.03126738  | 0.055468257 | -4.89280264 | ns |
| CHM      | -0.0286045  | 0.04361748  | -2.15159597 | 0.031444983 | 0.055749453 | -4.89074036 | ns |
| CD58     | 0.008848046 | -0.00246532 | 2.15042671  | 0.031537095 | 0.0558486   | -4.89973867 | ns |
| TMCO5A   | -0.02572549 | 0.040031296 | -2.15040304 | 0.031539158 | 0.0558486   | -4.89329149 | ns |
| CDC37    | -0.04229281 | 0.032377899 | -2.14939924 | 0.031618261 | 0.055954741 | -4.90665618 | ns |
| VMO1     | -0.03388145 | -0.09710761 | -2.14823261 | 0.031710933 | 0.056084752 | -4.90482042 | ns |
| SMS      | -0.02991753 | 0.122758021 | -2.14651199 | 0.031848059 | 0.05626593  | -4.9020884  | ns |
| MGMT     | -0.06202674 | -0.18246909 | -2.1464602  | 0.031851912 | 0.05626593  | -4.91110072 | ns |
| PDGFA    | -0.03606149 | -0.04660387 | -2.14614434 | 0.031876932 | 0.056276082 | -4.91615573 | ns |
| KDM3A    | -0.04279074 | 0.255803182 | -2.14398992 | 0.032049683 | 0.056546872 | -4.90537542 | ns |
| LATS1    | -0.03967378 | -0.00192792 | -2.1376588  | 0.032560525 | 0.057413487 | -4.91885056 | ns |
| IL20     | -0.02502585 | 0.048024629 | -2.13568017 | 0.032721524 | 0.057662554 | -4.92540545 | ns |
| ENO1     | -0.03941413 | -0.04632522 | -2.13470964 | 0.032800561 | 0.057766971 | -4.93577797 | ns |
| LRRC38   | -0.02221768 | 0.009561434 | -2.1320949  | 0.033015121 | 0.058109797 | -4.93226703 | ns |
| NARS1    | -0.02210506 | -0.05037414 | -2.13137933 | 0.033073567 | 0.058177599 | -4.94809706 | ns |
| PDP1     | -0.02539499 | 0.069024917 | -2.12868321 | 0.033296681 | 0.058534804 | -4.93899296 | ns |
| AKR7L    | -0.03222874 | 0.074744932 | -2.12802068 | 0.033351588 | 0.058596052 | -4.93928788 | ns |
| AGR2     | -0.04901629 | -0.02632782 | -2.1277334  | 0.033375479 | 0.058602766 | -4.93941204 | ns |
| MTSS2    | -0.04624616 | -0.01262639 | -2.12726684 | 0.033413712 | 0.058634639 | -4.95490809 | ns |
| HDGF     | -0.04732806 | 0.043572348 | -2.1263749  | 0.033487824 | 0.058701721 | -4.95866244 | ns |
| RBPMS    | -0.03064047 | 0.131082483 | -2.12632866 | 0.033492147 | 0.058701721 | -4.94286621 | ns |
| GGT5     | 0.010595889 | -0.00087408 | 2.125596908 | 0.033552841 | 0.058772823 | -4.9521909  | ns |
| CRYM     | -0.03453536 | 0.103205441 | -2.12524633 | 0.033582277 | 0.058789118 | -4.94724685 | ns |
| CEP290   | -0.02499146 | 0.057710574 | -2.1246531  | 0.03363159  | 0.058811382 | -4.95347743 | ns |
| RILPL2   | -0.04562583 | -0.07044128 | -2.12460622 | 0.033635277 | 0.058811382 | -4.96154048 | ns |
| SEPTIN7  | -0.02480316 | 0.063744073 | -2.12427018 | 0.033663584 | 0.058825652 | -4.95428629 | ns |
| C1QTNF5  | -0.01747472 | 0.003171889 | -2.1237864  | 0.03370417  | 0.05886135  | -4.95070069 | ns |
| MYOC     | 0.022859603 | -0.01576526 | 2.12352687  | 0.033725656 | 0.058863668 | -4.96013636 | ns |
| VPS4B    | -0.04366789 | 0.019127495 | -2.12055782 | 0.033974918 | 0.059263299 | -4.96907716 | ns |
| MYL4     | -0.02432927 | 0.067817221 | -2.12005144 | 0.034017994 | 0.059303011 | -4.9577168  | ns |
| CPXM1    | -0.03400109 | -0.0013521  | -2.11929442 | 0.034081513 | 0.059378292 | -4.9705472  | ns |
| SYAP1    | -0.02607443 | 0.062045785 | -2.11486896 | 0.034457406 | 0.059997392 | -4.96949067 | ns |
| REG3A    | -0.02973294 | 0.007334635 | -2.11440899 | 0.034496261 | 0.06002925  | -4.98338081 | ns |
| TIMM8A   | -0.04021977 | 0.032083689 | -2.11393382 | 0.034536849 | 0.060031507 | -4.98398411 | ns |
| LDLRAP1  | -0.04486143 | -0.0308755  | -2.11391216 | 0.034538675 | 0.060031507 | -4.98496559 | ns |
| FAM172A  | -0.0283959  | 0.025463418 | -2.10825636 | 0.035025275 | 0.060841049 | -4.98250935 | ns |
| ROR1     | -0.01503311 | -0.00128194 | -2.10604424 | 0.035216748 | 0.06113728  | -4.99435351 | ns |
| PAK4     | -0.030095   | 0.074696987 | -2.10473572 | 0.035330835 | 0.061298893 | -4.99031337 | ns |
| ARHGEF10 | -0.04314953 | 0.042159981 | -2.10411302 | 0.035384629 | 0.06135577  | -5.00551618 | ns |
| MANSC4   | -0.02917553 | 0.052623327 | -2.10246384 | 0.035529251 | 0.061569977 | -4.99370459 | ns |
| FGD3     | -0.0369866  | 0.024898097 | -2.10131165 | 0.035629696 | 0.061707421 | -5.01137363 | ns |
| PRAME    | 0.011716257 | -0.00051939 | 2.100943978 | 0.035662503 | 0.061727628 | -4.99515657 | ns |
| ELOB     | -0.01783816 | 0.021645314 | -2.09786433 | 0.035933784 | 0.062145716 | -5.00330845 | ns |
| ITGB7    | 0.022395603 | 0.023779023 | 2.09771324  | 0.035946615 | 0.062145716 | -5.01963307 | ns |
| F11      | -0.01395633 | 0.004171939 | -2.09448729 | 0.036233065 | 0.062603876 | -5.01642764 | ns |
| S100A4   | -0.02790059 | -0.02685058 | -2.09394891 | 0.036280801 | 0.062649285 | -5.02363928 | ns |
| SEMA3G   | -0.01968433 | 0.028069017 | -2.09222281 | 0.036435195 | 0.062878705 | -5.01685332 | ns |
| CERT     | -0.0296453  | -0.00329397 | -2.08815349 | 0.036800739 | 0.063472037 | -5.0248766  | ns |

|          |             |              |             |             |             |             |    |
|----------|-------------|--------------|-------------|-------------|-------------|-------------|----|
| TRIM24   | -0.02937241 | 0.040235476  | -2.08577369 | 0.037015732 | 0.063805158 | -5.03347029 | ns |
| EPHA4    | -0.0125813  | 0.001125959  | -2.08364356 | 0.037209326 | 0.064101021 | -5.03466305 | ns |
| BRK1     | -0.02131075 | -0.01238464  | -2.08082294 | 0.037466965 | 0.064506803 | -5.04006896 | ns |
| CDK5RAP3 | -0.02710269 | 0.097683472  | -2.07986327 | 0.037554444 | 0.064619314 | -5.05596207 | ns |
| HIF1A    | -0.03000251 | 0.100497978  | -2.07789736 | 0.03773574  | 0.064893028 | -5.04408452 | ns |
| PSMG4    | -0.0266432  | 0.064253249  | -2.07615577 | 0.037896497 | 0.065131119 | -5.04768091 | ns |
| CHIT1    | -0.07395561 | -0.33566846  | -2.07393996 | 0.038101502 | 0.065444933 | -5.06283235 | ns |
| TNXB     | 0.012199348 | 0.005160074  | 2.070027987 | 0.038466388 | 0.066032835 | -5.07167687 | ns |
| CCNE1    | -0.04340266 | 0.258550342  | -2.0697041  | 0.038497102 | 0.066046732 | -5.06097742 | ns |
| PPM1F    | -0.02384479 | 0.009556691  | -2.06853762 | 0.038606053 | 0.0661721   | -5.07843219 | ns |
| STAMBIP  | -0.03169228 | 0.012628826  | -2.06844001 | 0.038615499 | 0.0661721   | -5.07021512 | ns |
| DENND2B  | 0.022462647 | 0.084360074  | 2.06767745  | 0.038687434 | 0.066256485 | -5.0658174  | ns |
| FZD8     | -0.01886768 | 0.031289131  | -2.06531354 | 0.038910393 | 0.066599266 | -5.07209868 | ns |
| HMGCL    | -0.02192326 | 0.036305756  | -2.06451611 | 0.038985869 | 0.06668936  | -5.07324187 | ns |
| BAG6     | -0.01745394 | 0.019409766  | -2.06228905 | 0.03919733  | 0.066998753 | -5.07808219 | ns |
| TBCB     | -0.04899647 | -0.11186307  | -2.06212594 | 0.039212626 | 0.066998753 | -5.08433292 | ns |
| PDLIM5   | -0.05353625 | -0.09499585  | -2.06184451 | 0.039239149 | 0.067004863 | -5.09306739 | ns |
| RAB3GAP1 | -0.02610348 | 0.078988306  | -2.05942581 | 0.039470595 | 0.067347761 | -5.08417144 | ns |
| CA13     | -0.05050985 | -0.11725211  | -2.05926185 | 0.039486085 | 0.067347761 | -5.09007314 | ns |
| NTF4     | -0.01919348 | 0.050154806  | -2.0582866  | 0.039579816 | 0.067468221 | -5.08551568 | ns |
| LEFTY2   | 0.02489582  | 0.002759612  | 2.054078263 | 0.039984852 | 0.068118884 | -5.10888914 | ns |
| CDC25A   | 0.018530876 | 0.022917025  | 2.052443201 | 0.040143897 | 0.068349958 | -5.09529383 | ns |
| TTF2     | -0.0222303  | 0.04208929   | -2.05126745 | 0.040258106 | 0.06850447  | -5.10035668 | ns |
| PKN3     | -0.03341206 | 0.05040816   | -2.05038969 | 0.040343456 | 0.068609722 | -5.10761942 | ns |
| PCDH7    | -0.01531249 | 0.044885238  | -2.049585   | 0.040421778 | 0.068702905 | -5.11615476 | ns |
| NID2     | -0.03585683 | 0.02735187   | -2.0490369  | 0.040475449 | 0.068754108 | -5.11466452 | ns |
| RASGRF1  | 0.019855334 | 0.009859614  | 2.046641985 | 0.040710614 | 0.069113368 | -5.10711482 | ns |
| GPR15L   | -0.02689989 | -0.06430246  | -2.04251759 | 0.04111714  | 0.069762957 | -5.13053386 | ns |
| HSP90B1  | -0.03221316 | 0.15075284   | -2.0401297  | 0.041354907 | 0.070125626 | -5.12074808 | ns |
| IFNL1    | -0.02096952 | -0.01199736  | -2.03725588 | 0.041641843 | 0.070505217 | -5.12925877 | ns |
| CTSH     | -0.0356472  | -0.02036375  | -2.0371655  | 0.041650943 | 0.070505217 | -5.12817504 | ns |
| ANGPTL3  | -0.01664365 | 0.002493272  | -2.03699003 | 0.041668227 | 0.070505217 | -5.13624763 | ns |
| PECAM1   | -0.01434607 | -0.00117818  | -2.03681017 | 0.04168617  | 0.070505217 | -5.13950182 | ns |
| IL17RA   | -0.02120509 | -0.04241618  | -2.03667734 | 0.04169949  | 0.070505217 | -5.13977083 | ns |
| BMP4     | 0.021964697 | 0.039707954  | 2.035120157 | 0.041856051 | 0.070728975 | -5.13842909 | ns |
| OPHN1    | -0.04867066 | -0.01509244  | -2.03161968 | 0.042209195 | 0.071284471 | -5.1536458  | ns |
| PLPBP    | -0.03221174 | 0.002447923  | -2.02899136 | 0.042476441 | 0.07169434  | -5.15275686 | ns |
| PPP1R12B | -0.03214574 | 0.110767768  | -2.02856531 | 0.042519907 | 0.071726244 | -5.15187638 | ns |
| C8B      | -0.01345055 | -0.01490046  | -2.02632652 | 0.042748432 | 0.072070104 | -5.16440827 | ns |
| PRTFDC1  | -0.05355578 | -0.15489868  | -2.02526173 | 0.04285809  | 0.072213285 | -5.15348192 | ns |
| TPSAB1   | -0.02486123 | -0.03114601  | -2.02186472 | 0.043207472 | 0.072759988 | -5.17368413 | ns |
| STXBP3   | -0.0204692  | 0.054212812  | -2.02084918 | 0.043313061 | 0.072895757 | -5.16143181 | ns |
| KITLG    | -0.01719286 | -0.01029371  | -2.01771644 | 0.043638216 | 0.073400686 | -5.17544071 | ns |
| IMPG1    | -0.01385182 | 0.031766187  | -2.01174608 | 0.044264466 | 0.074411192 | -5.18066954 | ns |
| DRG2     | -0.02686357 | 0.044038546  | -2.00911183 | 0.044542809 | 0.07483602  | -5.19236244 | ns |
| MENT     | 0.009586504 | 0.007306714  | 2.005544841 | 0.044922587 | 0.075430682 | -5.19342548 | ns |
| LAMP2    | -0.00900933 | -0.01160369  | -2.00474377 | 0.045008372 | 0.075531291 | -5.1934832  | ns |
| CX3CL1   | -0.01516281 | 0.008456181  | -2.00437846 | 0.04504716  | 0.075552962 | -5.20108087 | ns |
| RBP2     | 0.035993236 | 0.011937797  | 2.003678819 | 0.045122078 | 0.075635171 | -5.20320143 | ns |
| GALNT5   | 0.01164605  | -0.00234879  | 2.000012221 | 0.045516374 | 0.076252331 | -5.21705117 | ns |
| CMIP     | -0.03618651 | 0.014338264  | -1.99386578 | 0.046184272 | 0.077326877 | -5.22824553 | ns |
| PGR      | -0.04562876 | 0.317079291  | -1.98802072 | 0.046827503 | 0.078358915 | -5.22574504 | ns |
| FOLR3    | -0.08828409 | -2.48704626  | -1.985264   | 0.047132811 | 0.078824632 | -5.24323566 | ns |
| SERPINA4 | -0.01015644 | -0.0074732   | -1.98342662 | 0.047337787 | 0.079122117 | -5.24053752 | ns |
| PYDC1    | -0.01788442 | 0.02500071   | -1.97892106 | 0.047843058 | 0.079920898 | -5.24529556 | ns |
| TXN      | -0.01905016 | 0.030304596  | -1.97838868 | 0.047902891 | 0.079975096 | -5.25013528 | ns |
| ATG4A    | -0.02799504 | 0.029637334  | -1.97798173 | 0.047948987 | 0.08000631  | -5.24664864 | ns |
| NEB      | -0.01618444 | 0.034835709  | -1.97675678 | 0.048087376 | 0.080191398 | -5.24861906 | ns |
| COL1A1   | 0.011694432 | 0.012764636  | 1.97553733  | 0.0482249   | 0.080374833 | -5.26577985 | ns |
| ACP6     | -0.03149351 | -0.13529999  | -1.96545599 | 0.049379313 | 0.082251907 | -5.28600477 | ns |
| PSMD1    | -0.02116408 | 0.032713185  | -1.9648185  | 0.049453056 | 0.082327779 | -5.28732221 | ns |
| KIR3DL1  | -0.05627216 | 8.5951209784 | -1.96392783 | 0.04955685  | 0.082436602 | -5.27418911 | ns |
| FLT3     | 0.014313581 | 0.013453869  | 1.96377235  | 0.049574888 | 0.082436602 | -5.27449269 | ns |
| NDST1    | -0.02707465 | 0.123615671  | -1.96262969 | 0.049707135 | 0.082609468 | -5.28969245 | ns |
| NCAN     | 0.017798156 | 0.031964853  | 1.959950888 | 0.050019413 | 0.083038768 | -5.2968507  | ns |
| TTN      | -0.0285748  | 0.133064876  | -1.9599308  | 0.050022326 | 0.083038768 | -5.28154796 | ns |

|          |             |             |             |             |             |             |    |
|----------|-------------|-------------|-------------|-------------|-------------|-------------|----|
| CES2     | -0.02554292 | 0.022069719 | -1.95794849 | 0.050254207 | 0.083376297 | -5.29327194 | ns |
| LSM1     | -0.02497532 | 0.064676575 | -1.95502838 | 0.050598214 | 0.083899366 | -5.29152727 | ns |
| LILRB1   | -0.01263995 | -0.02574908 | -1.95202757 | 0.050952899 | 0.084439537 | -5.31169043 | ns |
| DBH      | 0.046605196 | -0.1734946  | 1.949379957 | 0.051268149 | 0.08491378  | -5.31418095 | ns |
| MUC16    | -0.08573581 | -0.57778733 | -1.94807368 | 0.051424411 | 0.08508742  | -5.31244854 | ns |
| F3       | 0.012213339 | 0.001808745 | 1.948015192 | 0.051431266 | 0.08508742  | -5.31740302 | ns |
| CHL1     | 0.014049735 | 0.032665862 | 1.941115414 | 0.052262557 | 0.086413741 | -5.32749592 | ns |
| DKKL1    | 0.039465671 | -0.12792802 | 1.939767194 | 0.052426346 | 0.086635501 | -5.32850444 | ns |
| CBLIF    | 0.031352503 | 0.023234483 | 1.937670596 | 0.05268182  | 0.087008436 | -5.33233293 | ns |
| TMOD4    | 0.01712196  | -0.0037945  | 1.934805238 | 0.053032949 | 0.087538842 | -5.32846516 | ns |
| NAA10    | -0.02143133 | -0.00064846 | -1.93349953 | 0.053193444 | 0.087754155 | -5.3327066  | ns |
| MCEE     | -0.01811004 | 0.031594142 | -1.9323193  | 0.053338279 | 0.087943408 | -5.3502966  | ns |
| ENPP7    | -0.03928397 | -0.08705465 | -1.92635109 | 0.054079632 | 0.08911542  | -5.33893854 | ns |
| CASP3    | -0.03957585 | -0.05198916 | -1.92358187 | 0.054425296 | 0.089634441 | -5.3665056  | ns |
| ROBO2    | -0.00999074 | -0.0017756  | -1.92059245 | 0.054801424 | 0.090176864 | -5.37279181 | ns |
| CDON     | -0.01182586 | -0.01290001 | -1.92047508 | 0.054816416 | 0.090176864 | -5.36710483 | ns |
| FXYD5    | -0.02899515 | 0.054979395 | -1.91771642 | 0.055165813 | 0.090700548 | -5.3646143  | ns |
| ITGB6    | 0.013558376 | -0.00077488 | 1.916108677 | 0.055370116 | 0.090985221 | -5.36767859 | ns |
| CLEC12A  | -0.00806053 | -0.00314861 | -1.90977597 | 0.056181074 | 0.092265881 | -5.37735903 | ns |
| EIF1AX   | -0.02269017 | 0.097428929 | -1.90753787 | 0.056469434 | 0.092687322 | -5.39667028 | ns |
| LRRC37A2 | 0.017777939 | 0.009153847 | 1.905755082 | 0.056700514 | 0.093014327 | -5.39901082 | ns |
| KLK7     | -0.01626507 | -0.00131242 | -1.90499162 | 0.056800581 | 0.093126162 | -5.37628694 | ns |
| IGBP1    | -0.02564957 | 0.021935775 | -1.90451618 | 0.056861457 | 0.093173656 | -5.40333807 | ns |
| CLEC2L   | -0.02184332 | 0.095013194 | -1.90389386 | 0.056942979 | 0.093224701 | -5.39012692 | ns |
| VASH1    | -0.03601442 | 0.036014577 | -1.90378821 | 0.056956461 | 0.093224701 | -5.39976775 | ns |
| ATF2     | -0.031151   | 0.154533829 | -1.9024522  | 0.057131108 | 0.093458171 | -5.39327978 | ns |
| ITGB2    | 0.01264189  | 0.001628109 | 1.901037941 | 0.057315983 | 0.093708102 | -5.39813439 | ns |
| KLK12    | -0.06141079 | -0.54089191 | -1.8995021  | 0.0575176   | 0.093950377 | -5.39792758 | ns |
| ALPI     | 0.051338478 | 0.218777755 | 1.899246521 | 0.057551192 | 0.093950377 | -5.39729737 | ns |
| ENTPD2   | 0.018948496 | -0.0141158  | 1.898990647 | 0.057584821 | 0.093950377 | -5.39889339 | ns |
| INSL5    | -0.03963028 | 0.07745515  | -1.89892549 | 0.057592868 | 0.093950377 | -5.41193056 | ns |
| BTD      | -0.00849388 | -0.0210061  | -1.8941619  | 0.05822213  | 0.094923852 | -5.42203762 | ns |
| MAPK13   | -0.01761483 | -0.01175197 | -1.89206826 | 0.058501097 | 0.095325449 | -5.40976907 | ns |
| PCDH12   | -0.01016366 | 0.000365436 | -1.89025689 | 0.058742221 | 0.095664967 | -5.43024319 | ns |
| FCGR2A   | -0.02731407 | -0.16488572 | -1.88917274 | 0.058887697 | 0.095848426 | -5.42174759 | ns |
| C7       | 0.012593934 | -0.02684234 | 1.886868785 | 0.059197136 | 0.096298405 | -5.42353889 | ns |
| CHP1     | -0.03059225 | 0.05134312  | -1.88644285 | 0.059254501 | 0.096338053 | -5.42349855 | ns |
| NPR1     | 0.017394398 | 0.083365112 | 1.88509888  | 0.05943576  | 0.096578975 | -5.42458804 | ns |
| GART     | -0.01110305 | 0.018293948 | -1.88392006 | 0.059594463 | 0.096782998 | -5.44213498 | ns |
| GET3     | -0.02318649 | 0.09234847  | -1.88354782 | 0.059644884 | 0.09681104  | -5.44193851 | ns |
| AKT2     | -0.05190222 | -0.03975172 | -1.8807634  | 0.060022815 | 0.097370344 | -5.44804391 | ns |
| MINDY1   | -0.0445146  | -0.0426184  | -1.87730937 | 0.06049453  | 0.098081081 | -5.45259053 | ns |
| PPBP     | -0.03438582 | -0.07303779 | -1.8711534  | 0.06134281  | 0.099401223 | -5.46052946 | ns |
| DGKZ     | -0.0152346  | 0.008008366 | -1.86927924 | 0.061603308 | 0.099767975 | -5.45580631 | ns |
| VEGFC    | -0.02406701 | -0.02186157 | -1.86693382 | 0.061929772 | 0.100179925 | -5.47070668 | ns |
| IFNG     | -0.04955199 | -0.05072172 | -1.86676461 | 0.061953824 | 0.100179925 | -5.46047691 | ns |
| TRAF2    | -0.03096655 | 0.053272983 | -1.86671398 | 0.061960597 | 0.100179925 | -5.46927003 | ns |
| CRIM1    | -0.00850964 | -0.01135655 | -1.86639163 | 0.062005566 | 0.100197152 | -5.47102615 | ns |
| UNC79    | -0.02308166 | 0.06290999  | -1.86461917 | 0.062254289 | 0.100543431 | -5.46103165 | ns |
| FGFR4    | -0.02134785 | 0.040690262 | -1.86427861 | 0.062301921 | 0.100564736 | -5.46519997 | ns |
| ITGA6    | -0.0230485  | 0.070687955 | -1.86282816 | 0.062505541 | 0.100837668 | -5.4764756  | ns |
| BCAT1    | -0.01212648 | 0.004959264 | -1.86126197 | 0.062726123 | 0.101106272 | -5.48343472 | ns |
| SERPINE2 | -0.02593162 | 0.019631934 | -1.86115453 | 0.062741289 | 0.101106272 | -5.48363357 | ns |
| NRP2     | -0.01236972 | -0.00977445 | -1.85754766 | 0.06325239  | 0.101858912 | -5.48659646 | ns |
| ASS1     | -0.03165837 | 0.017910722 | -1.85736978 | 0.063278105 | 0.101858912 | -5.47617866 | ns |
| RPS10    | 0.015992303 | 0.03458539  | 1.856683131 | 0.063375798 | 0.101959962 | -5.47744649 | ns |
| LACRT    | 0.020123115 | 0.134445009 | 1.855607403 | 0.063528608 | 0.102149525 | -5.49206637 | ns |
| PTPN6    | -0.03892458 | -0.16876903 | -1.85461331 | 0.063670589 | 0.102321475 | -5.49170305 | ns |
| STAM     | -0.0151827  | 0.041060788 | -1.85291978 | 0.063912911 | 0.102654401 | -5.49782662 | ns |
| ARNT     | -0.01617159 | 0.047674603 | -1.85241677 | 0.063985492 | 0.102714479 | -5.48700589 | ns |
| BCL2L1   | -0.04015022 | -0.02771123 | -1.85189206 | 0.064060326 | 0.102778106 | -5.50068693 | ns |
| WAS      | -0.02905122 | 0.044807297 | -1.85134203 | 0.064139866 | 0.10280341  | -5.48898483 | ns |
| NEDD4L   | -0.01982475 | -0.03797548 | -1.85129646 | 0.064146511 | 0.10280341  | -5.48670125 | ns |
| RASA1    | -0.0140718  | -0.0007947  | -1.85096306 | 0.064194424 | 0.102823761 | -5.48935809 | ns |
| ADGRE5   | -0.01286213 | 0.006426324 | -1.85043929 | 0.064269376 | 0.102887378 | -5.50049254 | ns |
| ADAM15   | 0.013107518 | 0.009517776 | 1.847279247 | 0.064726272 | 0.103557677 | -5.49597071 | ns |



|          |             |             |              |             |             |             |    |
|----------|-------------|-------------|--------------|-------------|-------------|-------------|----|
| PEAR1    | 0.009741485 | -0.00098816 | 1.847049402  | 0.064759013 | 0.103557677 | -5.5099916  | ns |
| MYL1     | 0.016148189 | 0.036114753 | 1.843479363  | 0.065278724 | 0.104331622 | -5.50173483 | ns |
| TRAF3IP2 | 0.0188626   | 0.067928226 | 1.841596973  | 0.065553813 | 0.104680841 | -5.50518338 | ns |
| FAP      | 0.011417803 | -0.00573277 | 1.841489605  | 0.065568924 | 0.104680841 | -5.52018848 | ns |
| B3GAT3   | 0.00817281  | 0.005472928 | 1.839110769  | 0.065918606 | 0.105136902 | -5.50973272 | ns |
| SRC      | -0.05227358 | -0.05705954 | -1.83905318  | 0.065926599 | 0.105136902 | -5.52097435 | ns |
| SDHB     | -0.02721742 | 0.110010598 | -1.83778278  | 0.066113593 | 0.10537756  | -5.52553054 | ns |
| CD276    | -0.01465904 | -0.04616761 | -1.83752522  | 0.066151746 | 0.105380851 | -5.5207515  | ns |
| IGSF21   | 0.015909456 | 0.029836018 | 1.836261645  | 0.066338646 | 0.105620963 | -5.51587411 | ns |
| CHRD2    | -0.02327704 | 0.019447355 | -1.833292396 | 0.066684684 | 0.106114047 | -5.52739451 | ns |
| ITGAX    | -0.02146634 | 0.048829583 | -1.83329889  | 0.066777593 | 0.106204015 | -5.52678673 | ns |
| PRSS22   | -0.01326437 | 0.007900904 | -1.82867795  | 0.067467667 | 0.107243107 | -5.52808079 | ns |
| STK24    | -0.02623939 | 0.03087498  | -1.82821851  | 0.067536524 | 0.107294151 | -5.53096024 | ns |
| COMMD9   | -0.01562284 | 0.046024029 | -1.82737293  | 0.067662996 | 0.107436622 | -5.5445751  | ns |
| SCGN     | -0.01864739 | 0.019422048 | -1.82704001  | 0.067713475 | 0.10745834  | -5.53342629 | ns |
| PAEP     | -0.05805846 | 0.603761557 | -1.8257276   | 0.067910823 | 0.10771193  | -5.54127284 | ns |
| COL9A2   | -0.01843628 | 0.034086214 | -1.82547396  | 0.067949063 | 0.10771193  | -5.54102083 | ns |
| SLITRK1  | 0.013388344 | 0.037649771 | 1.825244744  | 0.067983934 | 0.10771193  | -5.53431724 | ns |
| PROCR    | 0.014043918 | 0.035921165 | 1.823971807  | 0.068176179 | 0.10795794  | -5.5373019  | ns |
| ATP5PO   | -0.01714935 | -0.00259435 | -1.8209741   | 0.068630616 | 0.108618644 | -5.54410306 | ns |
| CLSPN    | -0.01524938 | 0.036394742 | -1.81778684  | 0.069116616 | 0.109328559 | -5.54869789 | ns |
| ACTN4    | -0.0134174  | 0.020719715 | -1.81593451  | 0.069400233 | 0.109717747 | -5.55353966 | ns |
| FIS1     | -0.03276318 | 0.041544459 | -1.81299126  | 0.069852721 | 0.110373346 | -5.56588785 | ns |
| FGL1     | -0.02449116 | -0.03821862 | -1.81272221  | 0.069894041 | 0.110378907 | -5.57095341 | ns |
| PMS1     | -0.02023702 | 0.028484365 | -1.81054871  | 0.070230586 | 0.110811036 | -5.56249974 | ns |
| COPB2    | -0.01705989 | 0.014551357 | -1.8104656   | 0.070243571 | 0.110811036 | -5.56170546 | ns |
| TXNL1    | -0.03978135 | 0.30466603  | -1.80806829  | 0.070615828 | 0.111338131 | -5.56673945 | ns |
| CDKL5    | 0.020766708 | 0.076932762 | 1.805049363  | 0.071086899 | 0.112020369 | -5.57287374 | ns |
| NECAP2   | -0.02618475 | 0.090447479 | -1.80011177  | 0.071863032 | 0.113182337 | -5.58029041 | ns |
| C2CD2L   | -0.01797873 | 0.003650349 | -1.79801647  | 0.072194455 | 0.113643024 | -5.58423679 | ns |
| CR2      | -0.01943917 | 0.002131041 | -1.79654467  | 0.072427586 | 0.113948574 | -5.59615724 | ns |
| EIF4E    | -0.03534408 | 0.016366396 | -1.7883331   | 0.073742412 | 0.115954681 | -5.60062758 | ns |
| ERCC1    | 0.01263003  | 0.004867171 | 1.788065925  | 0.073785519 | 0.115960019 | -5.60004254 | ns |
| C7orf50  | -0.00938274 | 0.021179467 | -1.78654003  | 0.07403314  | 0.116283856 | -5.61891703 | ns |
| VSTM2B   | -0.01664797 | 0.074227913 | -1.78491851  | 0.074294384 | 0.116634194 | -5.61381896 | ns |
| CHMP1A   | -0.03307787 | -0.05802189 | -1.78271819  | 0.074652048 | 0.117132714 | -5.6184349  | ns |
| ANXA4    | -0.0298078  | 0.023679777 | -1.78109115  | 0.074917481 | 0.117451187 | -5.62042094 | ns |
| FCRL2    | -0.02020015 | 0.008403667 | -1.78097894  | 0.074935466 | 0.117451187 | -5.62916188 | ns |
| CALCOCO1 | -0.04382069 | 0.011091652 | -1.77868013  | 0.07531186  | 0.117977807 | -5.63253017 | ns |
| CPA4     | -0.01678669 | -0.00519132 | -1.77789413  | 0.075441743 | 0.118084532 | -5.61032505 | ns |
| OBP2B    | 0.026329572 | -0.03002272 | 1.777584635  | 0.075492071 | 0.118084532 | -5.62546628 | ns |
| CA4      | -0.00972153 | -0.00525554 | -1.7775261   | 0.075501308 | 0.118084532 | -5.6352898  | ns |
| DNAJA1   | 0.01765526  | 0.037094083 | 1.775370734  | 0.075856934 | 0.118577219 | -5.62253236 | ns |
| TIMP2    | -0.0097019  | -0.00708621 | -1.77493629  | 0.075928044 | 0.118624873 | -5.63951302 | ns |
| ECSCR    | -0.02009468 | 0.102597749 | -1.77324458  | 0.07620837  | 0.118995958 | -5.62945352 | ns |
| PTK7     | -0.01545796 | -0.0118655  | -1.77301108  | 0.076247068 | 0.118995958 | -5.6298018  | ns |
| RABGAP1L | -0.0250331  | 0.039207529 | -1.77189285  | 0.076432499 | 0.119221633 | -5.6320974  | ns |
| ACTA2    | -0.01754064 | 0.001956434 | -1.77012444  | 0.076726633 | 0.119599692 | -5.63472601 | ns |
| TGFB2    | -0.02060981 | -0.02043669 | -1.7699404   | 0.076756789 | 0.119599692 | -5.64730293 | ns |
| FLRT2    | -0.01142286 | -0.00756602 | -1.76861465  | 0.076978164 | 0.119880661 | -5.64333738 | ns |
| MYH4     | 0.018003274 | 0.062714261 | 1.767837583  | 0.077108342 | 0.120019381 | -5.63753839 | ns |
| WASF3    | -0.03456596 | -0.02752928 | -1.76741105  | 0.07717965  | 0.120066371 | -5.63965869 | ns |
| DHPS     | -0.0157262  | 0.015589513 | -1.75726616  | 0.078892257 | 0.122665276 | -5.66953134 | ns |
| UBE2Z    | -0.02297776 | 0.096815073 | -1.75669253  | 0.078990586 | 0.122752799 | -5.65639076 | ns |
| LTB      | -0.01310078 | 0.01994736  | -1.75369664  | 0.079502328 | 0.123423818 | -5.67576283 | ns |
| TMED8    | -0.03953391 | -0.03805682 | -1.75366977  | 0.079506918 | 0.123423818 | -5.67573582 | ns |
| CRYZL1   | -0.03542317 | -0.00707406 | -1.75230755  | 0.079741263 | 0.12367066  | -5.66565383 | ns |
| NOP56    | -0.04176616 | 0.32764567  | -1.75225339  | 0.079750635 | 0.12367066  | -5.66481101 | ns |
| CLEC4M   | 0.018429316 | 0.040276335 | 1.74986155   | 0.080162054 | 0.124242674 | -5.68202977 | ns |
| DHODH    | -0.01815606 | 0.04496766  | -1.74912223  | 0.080290302 | 0.124375428 | -5.67026148 | ns |
| RFC4     | -0.00818653 | 0.007016726 | -1.74858158  | 0.080383232 | 0.124390102 | -5.68467039 | ns |
| TMEM25   | 0.016803493 | 0.030939852 | 1.74857097   | 0.080384974 | 0.124390102 | -5.68660149 | ns |
| SOX9     | -0.01015514 | -0.01590623 | -1.74706891  | 0.080645695 | 0.124727452 | -5.67477561 | ns |
| MELTF    | 0.010942259 | 0.000390219 | 1.746300149  | 0.080778634 | 0.12486692  | -5.68965141 | ns |
| CREBZF   | 0.009930298 | 0.007433767 | 1.738999204  | 0.082055387 | 0.126773402 | -5.68607852 | ns |
| SCN3B    | -0.01834227 | 0.065220673 | -1.73509714  | 0.082744033 | 0.127769738 | -5.69599059 | ns |

|           |             |             |             |             |             |             |    |
|-----------|-------------|-------------|-------------|-------------|-------------|-------------|----|
| PACS2     | -0.02378497 | 0.04715147  | -1.73304418 | 0.083108323 | 0.128264431 | -5.69809532 | ns |
| SEZ6      | 0.011636088 | 0.016932741 | 1.729142911 | 0.083803938 | 0.129269678 | -5.70575589 | ns |
| MAMDC4    | 0.020483609 | 0.011583313 | 1.728031238 | 0.084002605 | 0.129507712 | -5.72019532 | ns |
| DNM1      | -0.04302743 | -0.09300698 | -1.72670816 | 0.084240061 | 0.129805265 | -5.72239421 | ns |
| MMP13     | 0.012675484 | -0.00648146 | 1.726094889 | 0.084350842 | 0.129907415 | -5.71141801 | ns |
| IL3       | 0.02263215  | -0.06562363 | 1.723786157 | 0.084767028 | 0.130416598 | -5.71226786 | ns |
| ZNRF4     | -0.02047746 | 0.023850275 | -1.72376219 | 0.084770789 | 0.130416598 | -5.72752248 | ns |
| GIT1      | -0.03710692 | 0.003260664 | -1.72331523 | 0.084852095 | 0.130472943 | -5.71413634 | ns |
| COMP      | -0.01363393 | -0.03413648 | -1.72275277 | 0.084953703 | 0.130560428 | -5.71797523 | ns |
| PKLR      | -0.0273327  | 0.06966314  | -1.72203948 | 0.0850825   | 0.130689585 | -5.72683389 | ns |
| B4GAT1    | 0.009981368 | 0.014502876 | 1.719899673 | 0.085470812 | 0.131217019 | -5.73143659 | ns |
| MAEA      | -0.01577481 | 0.026024076 | -1.71825634 | 0.085770447 | 0.131607833 | -5.72390904 | ns |
| VIPR1     | 0.008912143 | 0.008147347 | 1.716408554 | 0.086107831 | 0.132056128 | -5.72756187 | ns |
| DGCR6     | -0.01639858 | 0.039580816 | -1.7151611  | 0.086336242 | 0.132336916 | -5.73018775 | ns |
| IL17D     | -0.01349666 | 0.00077489  | -1.71323896 | 0.086689105 | 0.132787871 | -5.73372578 | ns |
| TBL1X     | -0.03449341 | -0.04315182 | -1.71306388 | 0.086721394 | 0.132787871 | -5.73276691 | ns |
| INPP1     | -0.02161582 | 0.027317281 | -1.71237506 | 0.086847838 | 0.132911786 | -5.74140392 | ns |
| PLA2G4A   | -0.0354776  | -0.02162898 | -1.71123741 | 0.087057412 | 0.133162726 | -5.74702192 | ns |
| EPN1      | -0.01624462 | 0.069220627 | -1.70846056 | 0.087571246 | 0.133878554 | -5.74661675 | ns |
| NTRK2     | -0.01009323 | -0.00515125 | -1.70729527 | 0.087787464 | 0.134138877 | -5.75034766 | ns |
| HTR1B     | -0.01604124 | 0.067602951 | -1.7067943  | 0.087880883 | 0.13421139  | -5.74442199 | ns |
| SMARCA2   | -0.02537176 | 0.053405972 | -1.69870418 | 0.089395579 | 0.136453262 | -5.75805586 | ns |
| RLN2      | -0.04561234 | 0.209122159 | -1.69116692 | 0.090825541 | 0.138563522 | -5.77041802 | ns |
| DCUN1D1   | -0.02817417 | 0.195712265 | -1.68962283 | 0.091120808 | 0.138941388 | -5.77341748 | ns |
| SF3B4     | -0.0298203  | 0.043033013 | -1.68789968 | 0.091450872 | 0.139371893 | -5.7827827  | ns |
| CDH1      | -0.01568285 | 0.007051752 | -1.6874252  | 0.091542805 | 0.139439223 | -5.76466514 | ns |
| CSF1R     | -0.01437961 | 0.001406766 | -1.6863519  | 0.091748192 | 0.139621059 | -5.79081754 | ns |
| NT5C      | -0.02741412 | 0.006915487 | -1.68630187 | 0.091757812 | 0.139621059 | -5.79205788 | ns |
| LIPF      | 0.021543505 | 0.015005395 | 1.685054208 | 0.091998807 | 0.139914852 | -5.78058468 | ns |
| DAND5     | 0.0209214   | -0.02889761 | 1.683941009 | 0.092213828 | 0.140168858 | -5.78083355 | ns |
| VIM       | -0.04538748 | -0.15861497 | -1.68367143 | 0.092265902 | 0.140175044 | -5.78317415 | ns |
| SSNA1     | -0.01879313 | 0.035008125 | -1.68040493 | 0.092898756 | 0.141063113 | -5.80083805 | ns |
| PAFAH2    | -0.01836765 | 0.031797092 | -1.67943637 | 0.093087491 | 0.141276234 | -5.79550651 | ns |
| IL6R      | -0.01347061 | -0.02117648 | -1.67710243 | 0.093543057 | 0.141893883 | -5.79685275 | ns |
| ECM1      | -0.01350476 | -0.05004231 | -1.67550653 | 0.093855663 | 0.142294152 | -5.79447663 | ns |
| PSPN      | -0.03857421 | -0.13095437 | -1.67279562 | 0.094387924 | 0.143026849 | -5.81054271 | ns |
| FGFBP1    | 0.012318144 | 0.004076195 | 1.672007781 | 0.094543055 | 0.143187615 | -5.81370505 | ns |
| RHOC      | -0.04632801 | -0.14197442 | -1.66998785 | 0.094942395 | 0.143717882 | -5.80855182 | ns |
| GAGE2A    | -0.02306306 | 0.102086336 | -1.66941882 | 0.095055241 | 0.14375666  | -5.8039816  | ns |
| KIR2DL2   | -0.0306841  | -0.03595269 | -1.66935919 | 0.095066476 | 0.14375666  | -5.81931012 | ns |
| DPP10     | -0.01299818 | 0.009161886 | -1.66899581 | 0.09513861  | 0.143791274 | -5.81685649 | ns |
| DIPK2B    | -0.00977068 | 0.021271387 | -1.66704799 | 0.095525539 | 0.144301383 | -5.81146554 | ns |
| SHD       | -0.03105149 | 0.212118268 | -1.66426159 | 0.096081049 | 0.14500947  | -5.81327873 | ns |
| SV2A      | -0.02232523 | 0.061479963 | -1.66419796 | 0.096093604 | 0.14500947  | -5.81532113 | ns |
| ARMCX2    | -0.02305375 | 0.119234436 | -1.66157371 | 0.096619067 | 0.145727105 | -5.82015045 | ns |
| CASQ2     | 0.017429982 | 0.063475369 | 1.660659017 | 0.096802804 | 0.145928853 | -5.82022418 | ns |
| LILRB5    | -0.02765225 | -0.1654132  | -1.65587954 | 0.097766444 | 0.147305478 | -5.8429684  | ns |
| BMP6      | -0.01596906 | -0.01019986 | -1.65505114 | 0.09793499  | 0.147483327 | -5.82995307 | ns |
| EDAR      | -0.03596498 | 0.052893438 | -1.65290909 | 0.098369826 | 0.1480618   | -5.84342733 | ns |
| PYY       | -0.03449587 | 0.091013097 | -1.65222846 | 0.098508873 | 0.148194698 | -5.8341097  | ns |
| TFAP2A    | -0.02191706 | 0.062959625 | -1.64940507 | 0.099085508 | 0.148985419 | -5.84018155 | ns |
| PDRG1     | -0.01918907 | 0.06402353  | -1.64547572 | 0.099892537 | 0.150121569 | -5.84612793 | ns |
| YJU2      | -0.01179591 | 0.015210591 | -1.64379228 | 0.100239462 | 0.150565447 | -5.86142982 | ns |
| VAV3      | -0.03595359 | 0.016715733 | -1.64283946 | 0.100437004 | 0.150784602 | -5.85092821 | ns |
| SUGT1     | -0.03117038 | -0.02594051 | -1.64235857 | 0.100536618 | 0.150856589 | -5.85071698 | ns |
| SERPINA11 | -0.01566338 | -0.04257808 | -1.64072186 | 0.10087544  | 0.151287255 | -5.86781531 | ns |
| HDDC2     | -0.0156643  | 0.034345231 | -1.64005616 | 0.101013831 | 0.151380903 | -5.86745641 | ns |
| MCTS1     | 0.009186559 | 0.037621962 | 1.63992276  | 0.101041568 | 0.151380903 | -5.86767397 | ns |
| IL17A     | -0.01630162 | 0.032403889 | -1.6372285  | 0.101603564 | 0.152144823 | -5.86034056 | ns |
| HAGH      | -0.02840071 | 0.031452897 | -1.63515877 | 0.102036101 | 0.152671543 | -5.87682158 | ns |
| AMBN      | 0.010262376 | 0.017408876 | 1.63479923  | 0.102111978 | 0.152671543 | -5.86429242 | ns |
| DOK1      | -0.04876554 | -0.15897007 | -1.63479581 | 0.102112166 | 0.152671543 | -5.87706766 | ns |
| IGHMBP2   | -0.02006726 | 0.082171458 | -1.6335862  | 0.10236671  | 0.152973794 | -5.86456352 | ns |
| GPC5      | 0.021319841 | 0.023330055 | 1.629964188 | 0.103129691 | 0.15403514  | -5.87762493 | ns |
| FOSB      | -0.01500805 | 0.025276102 | -1.62491939 | 0.104200651 | 0.155555164 | -5.87997837 | ns |
| IGF2BP3   | -0.01683619 | 0.075782969 | -1.62317643 | 0.104572664 | 0.15603075  | -5.88141851 | ns |

|          |             |             |             |             |             |             |    |
|----------|-------------|-------------|-------------|-------------|-------------|-------------|----|
| ITIH3    | -0.01450978 | -0.04103274 | -1.62249585 | 0.104717753 | 0.156167436 | -5.89203777 | ns |
| BRDT     | -0.01287131 | 0.00774433  | -1.61940712 | 0.105380673 | 0.157075837 | -5.88749503 | ns |
| PCDH1    | -0.00766259 | 0.012253928 | -1.61502749 | 0.106325125 | 0.158402737 | -5.90867614 | ns |
| DDR1     | -0.00819776 | -0.00572732 | -1.61238906 | 0.106897653 | 0.159174476 | -5.91422245 | ns |
| MGLL     | -0.03314022 | -0.09340847 | -1.61031483 | 0.107349662 | 0.159766061 | -5.91258314 | ns |
| THRAP3   | -0.04020164 | 0.382559705 | -1.60884244 | 0.107671797 | 0.160163855 | -5.90445115 | ns |
| HGFAC    | -0.00971415 | -0.02443488 | -1.60825366 | 0.107800267 | 0.160273309 | -5.91317693 | ns |
| TPM3     | 0.015176897 | 0.046215884 | 1.607948645 | 0.107867428 | 0.160291546 | -5.90588058 | ns |
| GIPC3    | -0.03447813 | -0.09430871 | -1.60565796 | 0.108369503 | 0.160955721 | -5.92297194 | ns |
| ABCA2    | -0.01279595 | 0.000989298 | -1.60427782 | 0.108673836 | 0.161325674 | -5.91174296 | ns |
| GALNT2   | 0.0094398   | 0.01457175  | 1.600426263 | 0.109524406 | 0.162505724 | -5.93405885 | ns |
| ADRA2A   | -0.02561814 | 0.188818132 | -1.59980355 | 0.109663187 | 0.162629002 | -5.91887034 | ns |
| CA1      | -0.02333024 | 0.002897596 | -1.59944179 | 0.109743687 | 0.16266577  | -5.91381108 | ns |
| SPTBN2   | -0.01118756 | 0.035285245 | -1.59899138 | 0.10984347  | 0.162712061 | -5.9216007  | ns |
| HK2      | -0.0099195  | -0.00680668 | -1.59879844 | 0.109886364 | 0.162712061 | -5.9216827  | ns |
| MAPT     | -0.01890474 | -0.05906622 | -1.59829678 | 0.10999791  | 0.162736325 | -5.92264123 | ns |
| POLR2A   | 0.010346669 | 0.012630235 | 1.5982237   | 0.110014215 | 0.162736325 | -5.92070395 | ns |
| SPRED2   | -0.01586295 | 0.055718089 | -1.5973113  | 0.110217348 | 0.162954256 | -5.92215349 | ns |
| PTPRZ1   | 0.01143754  | 0.020720232 | 1.596524367 | 0.110392171 | 0.163130132 | -5.93860847 | ns |
| DSG4     | 0.01872808  | 0.019924538 | 1.594616828 | 0.110818648 | 0.163673884 | -5.93388798 | ns |
| GAD1     | 0.009178712 | -0.00547326 | 1.59437886  | 0.11087224  | 0.163673884 | -5.92574265 | ns |
| WASL     | -0.01990132 | 0.092964813 | -1.59238315 | 0.111319662 | 0.164251346 | -5.92996859 | ns |
| COL4A4   | 0.018253006 | -0.0504766  | 1.591824014 | 0.111444986 | 0.164353211 | -5.93731455 | ns |
| HRC      | 0.011673171 | 0.043459423 | 1.589869634 | 0.111885159 | 0.164919063 | -5.93556379 | ns |
| NELL2    | -0.01048002 | 0.012721347 | -1.58757621 | 0.11240271  | 0.165598342 | -5.94985949 | ns |
| MMP1     | -0.03430518 | -0.08202117 | -1.57987397 | 0.114157221 | 0.16809838  | -5.93754103 | ns |
| USP28    | -0.01281355 | 0.036867591 | -1.57458632 | 0.115372372 | 0.169742195 | -5.97315403 | ns |
| CDH15    | -0.02064352 | 0.121763737 | -1.57451097 | 0.115389814 | 0.169742195 | -5.97310297 | ns |
| CD2      | -0.01283477 | 0.022154011 | -1.56753931 | 0.117009733 | 0.17203848  | -5.96967717 | ns |
| ACADSB   | -0.02989622 | 0.063970581 | -1.56566194 | 0.11744821  | 0.172596262 | -5.98713678 | ns |
| TP53BP1  | -0.03055157 | 0.251193469 | -1.56484046 | 0.117641367 | 0.172793154 | -5.97320149 | ns |
| CPOX     | 0.008948139 | 0.008684269 | 1.563082965 | 0.118054128 | 0.173229405 | -5.97593459 | ns |
| EGF      | -0.03811663 | -0.08533551 | -1.56306912 | 0.118057026 | 0.173229405 | -5.98461382 | ns |
| ASRGL1   | -0.03484837 | 0.018850975 | -1.56223172 | 0.118254398 | 0.173415568 | -5.97887662 | ns |
| MST1     | -0.022539   | -0.17445556 | -1.56202593 | 0.118302675 | 0.173415568 | -5.98367998 | ns |
| GALNT7   | 0.007566604 | -0.00772705 | 1.559671375 | 0.118858245 | 0.174142537 | -5.98983684 | ns |
| FGF7     | 0.027334773 | 0.183344146 | 1.555143998 | 0.119932843 | 0.175628837 | -5.9871775  | ns |
| LAMB1    | -0.0102316  | -0.02319061 | -1.55438868 | 0.12011272  | 0.175804081 | -5.99102956 | ns |
| ARL2BP   | -0.01382538 | 0.02596605  | -1.5531186  | 0.120415855 | 0.176159467 | -5.99205102 | ns |
| MORF4L2  | -0.01307497 | 0.058965624 | -1.55125321 | 0.120862079 | 0.176723721 | -5.99318639 | ns |
| CD34     | 0.008612    | 0.007987352 | 1.549109359 | 0.121375887 | 0.177364918 | -6.01255759 | ns |
| STEAP4   | 0.02474968  | 0.136177115 | 1.54891942  | 0.121422079 | 0.177364918 | -5.99996727 | ns |
| NDUFA5   | -0.01189873 | -0.00320435 | -1.5482103  | 0.121592759 | 0.177525428 | -5.99765605 | ns |
| TYRO3    | -0.01022354 | -0.01199441 | -1.54303155 | 0.122843792 | 0.179262305 | -6.01581516 | ns |
| PLAU     | 0.010109339 | -0.0023092  | 1.541110236 | 0.123310547 | 0.179853544 | -6.02133695 | ns |
| IDS      | 0.00316209  | -0.00462316 | 1.540785291 | 0.123389422 | 0.179878738 | -6.02652759 | ns |
| LRRN1    | 0.014211258 | 0.029754759 | 1.537913882 | 0.124090617 | 0.180786446 | -6.0171204  | ns |
| SCARF2   | 0.009925502 | -0.01020922 | 1.537726523 | 0.124135898 | 0.180786446 | -6.0311756  | ns |
| STOML2   | -0.03159442 | 0.116380286 | -1.53662055 | 0.124407317 | 0.181091408 | -6.0156502  | ns |
| GRIK2    | -0.01358082 | 0.066927855 | -1.53562393 | 0.124651021 | 0.181355746 | -6.0343592  | ns |
| GABARAP  | -0.01584485 | 0.031043897 | -1.5324929  | 0.125421322 | 0.182385587 | -6.0372158  | ns |
| CNGB3    | -0.0185717  | 0.079514158 | -1.53008814 | 0.126015892 | 0.183158986 | -6.0287948  | ns |
| MAP1LC3A | 0.010416512 | -0.01068705 | 1.529269534 | 0.126218616 | 0.183301079 | -6.03003995 | ns |
| AKAP12   | 0.006406351 | 0.01417554  | 1.52918609  | 0.126239202 | 0.183301079 | -6.0305423  | ns |
| NLGN2    | 0.016248752 | 0.090306197 | 1.526883315 | 0.126811004 | 0.184039827 | -6.03366575 | ns |
| MDGA1    | 0.025016885 | -0.03926383 | 1.525007922 | 0.127277831 | 0.184625567 | -6.04226893 | ns |
| IL33     | -0.01370185 | -0.01659228 | -1.52379116 | 0.127581822 | 0.184974638 | -6.03861854 | ns |
| LAMP1    | 0.009269799 | 0.021496303 | 1.519786083 | 0.128585773 | 0.186337695 | -6.04351976 | ns |
| APPL2    | -0.03758275 | -0.06227341 | -1.51801077 | 0.129032555 | 0.186892391 | -6.04747323 | ns |
| EPHX2    | -0.02148098 | 0.095137112 | -1.51414345 | 0.130010438 | 0.188215409 | -6.05270276 | ns |
| PHYKPL   | -0.01380201 | -0.02113701 | -1.51237298 | 0.130459869 | 0.188772457 | -6.05596753 | ns |
| CRADD    | -0.02713127 | -0.01467828 | -1.51135955 | 0.130717611 | 0.189027076 | -6.06170949 | ns |
| LILRB2   | -0.01222948 | -0.05750719 | -1.5111713  | 0.130765306 | 0.189027076 | -6.06757176 | ns |
| NCS1     | -0.00968996 | -0.0294056  | -1.51049504 | 0.130937513 | 0.189182354 | -6.07317816 | ns |
| FGFBP2   | 0.016391314 | 0.026673303 | 1.509451587 | 0.131203824 | 0.189473375 | -6.07264252 | ns |
| NTproBNP | 0.03365459  | 0.013750353 | 1.508853114 | 0.131356961 | 0.189600755 | -6.06767989 | ns |

|          |             |             |             |             |             |             |    |
|----------|-------------|-------------|-------------|-------------|-------------|-------------|----|
| CADPS    | -0.01411516 | 0.059040309 | -1.504259   | 0.132535585 | 0.191207465 | -6.06727001 | ns |
| PSMA1    | -0.01672558 | 0.049360822 | -1.50370346 | 0.132678732 | 0.191319455 | -6.06759319 | ns |
| REXO2    | 0.016489994 | 0.098420301 | 1.501625373 | 0.133214891 | 0.19199777  | -6.07025623 | ns |
| HRG      | -0.01042684 | -0.0149451  | -1.50101631 | 0.133371859 | 0.19212917  | -6.08211384 | ns |
| KLKB1    | -0.00819875 | 0.002368563 | -1.500441   | 0.133521053 | 0.192249248 | -6.07585136 | ns |
| TPPP2    | 0.025921437 | 0.081118914 | 1.499284633 | 0.133820484 | 0.192585418 | -6.0802332  | ns |
| SLC44A4  | -0.02239332 | 0.144008815 | -1.49738558 | 0.134313838 | 0.1932002   | -6.0775277  | ns |
| RANBP1   | -0.01744685 | 0.010970865 | -1.49394916 | 0.135209832 | 0.19439326  | -6.08263048 | ns |
| HSBP1    | -0.03120183 | 0.031978279 | -1.49333254 | 0.135371086 | 0.194529316 | -6.08354631 | ns |
| GMPR     | -0.01759644 | -0.0478651  | -1.49243773 | 0.135604741 | 0.194769229 | -6.09945099 | ns |
| OGA      | -0.02308383 | 0.01674354  | -1.48950801 | 0.136374041 | 0.195777876 | -6.1017352  | ns |
| S100A16  | -0.02167726 | 0.050048385 | -1.48612207 | 0.13726779  | 0.196964101 | -6.09397529 | ns |
| LILRA3   | 0.04499207  | -0.39521281 | 1.483007489 | 0.138092774 | 0.198050541 | -6.11199209 | ns |
| XIAP     | -0.01888648 | 0.048017503 | -1.4820594  | 0.138345449 | 0.198315518 | -6.09860132 | ns |
| CD14     | -0.01401109 | -0.0185986  | -1.48133681 | 0.138537984 | 0.198494069 | -6.09476427 | ns |
| LYPLA2   | -0.03469095 | 0.294517046 | -1.47794519 | 0.139443336 | 0.199693252 | -6.10677749 | ns |
| SPP1     | -0.01530074 | -0.01950902 | -1.47448145 | 0.140372341 | 0.200925115 | -6.1242445  | ns |
| HS3ST3B1 | 0.012866545 | -0.00308259 | 1.472962148 | 0.140781816 | 0.201412495 | -6.12058522 | ns |
| BTNL10   | 0.012635929 | 0.049262722 | 1.472354318 | 0.14094617  | 0.201539328 | -6.11179052 | ns |
| IL5RA    | -0.0191315  | -0.01403151 | -1.47212176 | 0.141008509 | 0.201539328 | -6.12434654 | ns |
| STAU1    | -0.02201215 | 0.141479601 | -1.47045943 | 0.141458307 | 0.202083296 | -6.1145629  | ns |
| GZMH     | -0.02494766 | -0.03104039 | -1.46935345 | 0.141757825 | 0.202412151 | -6.11914228 | ns |
| LARP1    | -0.02050362 | 0.079535597 | -1.46658954 | 0.1425081   | 0.203351694 | -6.13549821 | ns |
| PTPRR    | -0.01157131 | 0.016323987 | -1.46641662 | 0.142555109 | 0.203351694 | -6.13672461 | ns |
| ICAM3    | -0.00871596 | -0.01010071 | -1.46412118 | 0.143181106 | 0.204119893 | -6.14047051 | ns |
| BEX3     | 0.015032913 | 0.045650722 | 1.463932022 | 0.143233446 | 0.204119893 | -6.12408574 | ns |
| SATB1    | -0.00971454 | 0.036292245 | -1.46248625 | 0.143628253 | 0.204582683 | -6.14339721 | ns |
| TARM1    | 0.024754581 | 0.174656274 | 1.458595786 | 0.144697172 | 0.206004751 | -6.13453614 | ns |
| ATP6V1G2 | -0.03065341 | -0.00683579 | -1.45349351 | 0.146107657 | 0.207845689 | -6.14097306 | ns |
| ANGPTL7  | 0.012092102 | -0.01204065 | 1.453401235 | 0.146132603 | 0.207845689 | -6.15732662 | ns |
| DTX2     | 0.020556643 | 0.139973222 | 1.452411735 | 0.146407912 | 0.208135883 | -6.14348646 | ns |
| ZP3      | 0.083192342 | -1.06320738 | 1.451235014 | 0.146735234 | 0.2084997   | -6.14517719 | ns |
| AFP      | 0.023060488 | 0.046349366 | 1.450494181 | 0.146941377 | 0.208610053 | -6.15082208 | ns |
| SEZ6L2   | 0.007887263 | 0.005849029 | 1.450442085 | 0.14695578  | 0.208610053 | -6.15332036 | ns |
| PTH1R    | -0.01293403 | 0.036501877 | -1.44493452 | 0.148496701 | 0.210695027 | -6.16378122 | ns |
| SAFB2    | -0.00881521 | 0.00595971  | -1.43909105 | 0.150144889 | 0.212930101 | -6.17715345 | ns |
| IVD      | -0.01654652 | -0.00277769 | -1.43836263 | 0.150351959 | 0.213120252 | -6.16410699 | ns |
| CST6     | -0.01590416 | -0.00076379 | -1.43747742 | 0.150603381 | 0.213373058 | -6.15876928 | ns |
| IGF1R    | -0.00704018 | -0.00848575 | -1.43691877 | 0.150761526 | 0.213408822 | -6.17273554 | ns |
| ADAMTS1  | -0.00976027 | -0.00245939 | -1.43687334 | 0.150774794 | 0.213408822 | -6.16417686 | ns |
| EFNB2    | -0.01821114 | 0.027226755 | -1.43453178 | 0.151441254 | 0.214248286 | -6.16915064 | ns |
| DEFB116  | -0.02353124 | 0.196574092 | -1.43367989 | 0.151684369 | 0.214488309 | -6.17085757 | ns |
| CA12     | 0.010306817 | 0.010701771 | 1.432230273 | 0.152098362 | 0.214969611 | -6.17942429 | ns |
| CACNA1H  | 0.017979934 | 0.101908115 | 1.426446643 | 0.153760226 | 0.217213285 | -6.17970049 | ns |
| OGT      | -0.02013217 | 0.108604218 | -1.42328419 | 0.154674222 | 0.218398805 | -6.190674   | ns |
| REST     | 0.011362791 | 0.023897697 | 1.422176236 | 0.154995856 | 0.218747173 | -6.18400117 | ns |
| TBR1     | 0.015038414 | 0.082587646 | 1.421460658 | 0.155203514 | 0.218934426 | -6.18771134 | ns |
| CAT      | -0.01727237 | 0.057282782 | -1.42085519 | 0.155379325 | 0.219076595 | -6.19346065 | ns |
| SEPTIN3  | -0.02315728 | -0.00302157 | -1.41877535 | 0.155984598 | 0.219823854 | -6.20602491 | ns |
| CEACAM3  | -0.01537344 | 0.01329305  | -1.41588114 | 0.156831011 | 0.220910059 | -6.19507398 | ns |
| SERPINB9 | -0.01115876 | -0.06070617 | -1.41509688 | 0.157060485 | 0.221126623 | -6.20294659 | ns |
| FMR1     | -0.01114719 | -0.00868669 | -1.41050493 | 0.158411321 | 0.222920992 | -6.20262892 | ns |
| MILR1    | -0.01670967 | 0.004733664 | -1.40982649 | 0.158611509 | 0.223095186 | -6.20484425 | ns |
| MMP15    | 0.014634758 | 0.08078203  | 1.408791594 | 0.158916876 | 0.223417081 | -6.2191612  | ns |
| SLC13A1  | -0.01925761 | 0.119842829 | -1.40820141 | 0.159091559 | 0.223555031 | -6.2189654  | ns |
| RARRES1  | -0.01098156 | 0.017547976 | -1.40703234 | 0.159438461 | 0.223934731 | -6.20749351 | ns |
| IL2RB    | -0.01226124 | 0.031361709 | -1.40650362 | 0.159595202 | 0.224047111 | -6.20949719 | ns |
| BCL7B    | -0.01434397 | 0.057095201 | -1.40607328 | 0.159722475 | 0.224118034 | -6.22194358 | ns |
| CRX      | -0.03598933 | 0.339559902 | -1.40438953 | 0.160223502 | 0.224713077 | -6.21196297 | ns |
| PRSS27   | -0.01308021 | 0.003530051 | -1.40401044 | 0.160336113 | 0.224763058 | -6.21729783 | ns |
| IKZF2    | -0.03062976 | 0.245988819 | -1.40279134 | 0.160699708 | 0.225164657 | -6.21341826 | ns |
| DCC      | -0.00690917 | 0.018421443 | -1.39806153 | 0.162115106 | 0.227038901 | -6.22051338 | ns |
| TSPAN8   | -0.03001624 | -0.01467177 | -1.39484474 | 0.1630827   | 0.228284508 | -6.2375084  | ns |
| AIF1L    | -0.01764377 | 0.121793856 | -1.3921123  | 0.163908924 | 0.229331125 | -6.22875843 | ns |
| TSPYL1   | -0.01221078 | 0.030297154 | -1.39025554 | 0.164471874 | 0.229970874 | -6.229703   | ns |
| DOC2B    | -0.01067444 | 0.019526688 | -1.39008452 | 0.164523684 | 0.229970874 | -6.23157153 | ns |

|           |             |             |             |             |             |             |    |
|-----------|-------------|-------------|-------------|-------------|-------------|-------------|----|
| ADAMTSL4  | 0.007087762 | 0.001425792 | 1.386686075 | 0.165558009 | 0.231305926 | -6.23625534 | ns |
| AMFR      | -0.02116585 | 0.073026188 | -1.38554794 | 0.165905492 | 0.231667181 | -6.23826074 | ns |
| CDC123    | 0.01978679  | 0.071682469 | 1.385229987 | 0.166002721 | 0.231667181 | -6.23557012 | ns |
| CASP8     | -0.0201557  | 0.032287333 | -1.38505833 | 0.166054593 | 0.231667181 | -6.25243187 | ns |
| DCDC2C    | -0.01888751 | 0.044513062 | -1.38229085 | 0.166902963 | 0.232739566 | -6.23961425 | ns |
| SAT1      | 0.015078124 | 0.094941549 | 1.381731295 | 0.167074755 | 0.232867917 | -6.24213181 | ns |
| GNAS      | -0.02632429 | 0.228743839 | -1.37891874 | 0.167939677 | 0.233961764 | -6.26147445 | ns |
| RAD23B    | -0.01450117 | 0.020030052 | -1.37459746 | 0.169276752 | 0.235712025 | -6.25235111 | ns |
| RAB33A    | -0.02026798 | 0.04945868  | -1.37361934 | 0.169580373 | 0.236021497 | -6.25324467 | ns |
| GFRA2     | -0.0065766  | -0.0100504  | -1.37335976 | 0.169660658 | 0.236021497 | -6.26155064 | ns |
| UGDH      | -0.02998177 | 0.276952341 | -1.37291491 | 0.169799282 | 0.236023253 | -6.25420661 | ns |
| GFRAL     | 0.018355866 | 0.029409398 | 1.3728368   | 0.16982358  | 0.236023253 | -6.25370679 | ns |
| CNTNAP2   | -0.01307436 | -0.00203018 | -1.37038906 | 0.170585532 | 0.236969435 | -6.2681383  | ns |
| APOE      | 0.021373864 | 0.064077749 | 1.368173746 | 0.171277537 | 0.237672319 | -6.27528707 | ns |
| RALB      | 0.009018369 | -0.01002296 | 1.368020393 | 0.171326137 | 0.237672319 | -6.26019582 | ns |
| F12       | -0.01243603 | -0.05682967 | -1.36798792 | 0.171335696 | 0.237672319 | -6.27553991 | ns |
| CLIC5     | -0.00918307 | 0.025628319 | -1.3637433  | 0.17266868  | 0.239407667 | -6.26763778 | ns |
| UROD      | -0.02089717 | 0.00481737  | -1.36329189 | 0.172810801 | 0.239486457 | -6.26911899 | ns |
| CHEK2     | -0.01032551 | -0.00418134 | -1.36304234 | 0.172889538 | 0.239486457 | -6.26885506 | ns |
| HEPH      | 0.007968168 | -0.01941702 | 1.362285536 | 0.1731276   | 0.239630624 | -6.28324558 | ns |
| SESTD1    | -0.02046969 | 0.061696307 | -1.36197787 | 0.17322523  | 0.239630624 | -6.27045906 | ns |
| GLYR1     | -0.01799179 | 0.120905003 | -1.36193007 | 0.173239811 | 0.239630624 | -6.28270386 | ns |
| FCER1A    | -0.00696554 | -0.01828823 | -1.35923873 | 0.174090698 | 0.240693578 | -6.28827128 | ns |
| ESPL1     | 0.016753962 | 0.103070526 | 1.356604969 | 0.174927147 | 0.241710883 | -6.27459149 | ns |
| CDKN2D    | -0.03014954 | -0.14583199 | -1.35637052 | 0.175001324 | 0.241710883 | -6.28461054 | ns |
| GJA8      | -0.01784698 | 0.059133844 | -1.35614055 | 0.175074835 | 0.241710883 | -6.27521786 | ns |
| FUT3_FUT5 | -0.01423434 | -0.02595265 | -1.35412389 | 0.175716586 | 0.242482245 | -6.29520251 | ns |
| ABHD14B   | -0.01800596 | 0.007687654 | -1.35172242 | 0.176484199 | 0.243347843 | -6.28896605 | ns |
| MBL2      | -0.03165026 | -0.09040089 | -1.35164014 | 0.176510524 | 0.243347843 | -6.28946731 | ns |
| EBI3_IL27 | 0.009537292 | 0.003729888 | 1.349428417 | 0.177219109 | 0.244209437 | -6.30141278 | ns |
| CARHSP1   | -0.01645798 | 0.032933344 | -1.34894129 | 0.177376096 | 0.244310472 | -6.2880307  | ns |
| ANKRD54   | -0.01900549 | 0.086611443 | -1.3455115  | 0.17848039  | 0.245715577 | -6.2916877  | ns |
| PTX3      | 0.015645407 | -0.07781515 | 1.344596435 | 0.178775471 | 0.246005831 | -6.30295916 | ns |
| CD226     | -0.01212378 | 0.018159776 | -1.3428696  | 0.179334474 | 0.246658814 | -6.29409471 | ns |
| SDK2      | -0.01109302 | 0.019304664 | -1.34044418 | 0.180121088 | 0.247624095 | -6.29983337 | ns |
| PFDN6     | 0.019282575 | 0.110482804 | 1.340155239 | 0.180215025 | 0.247636646 | -6.29934899 | ns |
| CNPY2     | -0.01827663 | 0.093270407 | -1.33940707 | 0.180458393 | 0.247854425 | -6.3006128  | ns |
| BTLA      | -0.02497837 | 0.116180113 | -1.3379251  | 0.180941105 | 0.248378097 | -6.29961648 | ns |
| PIK3AP1   | -0.01936686 | 0.0190266   | -1.33760884 | 0.181043806 | 0.248378097 | -6.31227876 | ns |
| RAB2B     | -0.01787287 | 0.019342448 | -1.33745193 | 0.181094852 | 0.248378097 | -6.31556138 | ns |
| PRDX2     | -0.01867202 | 0.061656396 | -1.33476073 | 0.181974657 | 0.249467604 | -6.31077212 | ns |
| KYAT1     | -0.01758066 | 0.009767978 | -1.33286061 | 0.182597425 | 0.250097565 | -6.31540861 | ns |
| SDC4      | -0.01429108 | -0.0308522  | -1.33283595 | 0.182605482 | 0.250097565 | -6.31638917 | ns |
| DNAJB8    | -0.01748984 | 0.109921576 | -1.33214122 | 0.182833937 | 0.25029306  | -6.31026402 | ns |
| RABEPK    | -0.01857868 | 0.093189341 | -1.32931216 | 0.183765166 | 0.251449993 | -6.31323146 | ns |
| RPA2      | -0.00897688 | 0.022340899 | -1.32816871 | 0.184142538 | 0.251848342 | -6.31361773 | ns |
| KLK15     | 0.014804029 | 0.013451287 | 1.327467945 | 0.184373585 | 0.252046286 | -6.3279537  | ns |
| IL25      | -0.00992269 | -0.01733542 | -1.32687835 | 0.184569171 | 0.252195591 | -6.31221012 | ns |
| ENSA      | -0.01495216 | 0.040915338 | -1.32660852 | 0.184657823 | 0.252198711 | -6.32992629 | ns |
| SH3GLB2   | -0.0198257  | -0.01082004 | -1.32582385 | 0.184917591 | 0.252435421 | -6.33193759 | ns |
| EPPK1     | -0.02094846 | 0.027879247 | -1.32171017 | 0.186284733 | 0.254182907 | -6.3237526  | ns |
| KIRREL1   | -0.01687476 | 0.123520414 | -1.32024445 | 0.186773458 | 0.254730732 | -6.32617898 | ns |
| PGA4      | -0.01823277 | 0.005538634 | -1.31891042 | 0.187218574 | 0.255218597 | -6.33991392 | ns |
| CRH       | 0.027173757 | 0.086425125 | 1.313547716 | 0.189018539 | 0.257552093 | -6.33293607 | ns |
| OMP       | -0.01394174 | 0.061522709 | -1.31312793 | 0.189159827 | 0.257624392 | -6.33549682 | ns |
| ADCYAP1R1 | 0.010464533 | 0.027351203 | 1.312611343 | 0.189333972 | 0.257741351 | -6.335169   | ns |
| CXCL12    | 0.011967572 | 0.002110372 | 1.302588189 | 0.192735249 | 0.262211526 | -6.34946798 | ns |
| CTSE      | 0.014703601 | 0.016807315 | 1.302406371 | 0.19279731  | 0.262211526 | -6.34981667 | ns |
| CHAC2     | -0.01816975 | 0.03139876  | -1.30128603 | 0.193180498 | 0.26261036  | -6.34988771 | ns |
| CD1C      | -0.00712142 | -0.00175217 | -1.3006637  | 0.193393009 | 0.262776913 | -6.36261053 | ns |
| BABAM1    | -0.00816114 | 0.022090663 | -1.30029015 | 0.193521473 | 0.262829164 | -6.35005087 | ns |
| USP47     | -0.02472444 | 0.166035214 | -1.298927   | 0.193988906 | 0.263288823 | -6.35249408 | ns |
| COL3A1    | 0.006432392 | -0.00211634 | 1.298775705 | 0.194040256 | 0.263288823 | -6.36683883 | ns |
| PAR3      | -0.02092693 | 0.088625529 | -1.29648083 | 0.194829476 | 0.264236912 | -6.36215614 | ns |
| RAD51     | 0.015302003 | 0.045274108 | 1.294614236 | 0.195472918 | 0.2649865   | -6.36456103 | ns |
| GAD2      | -0.01294693 | 0.056749684 | -1.29375561 | 0.195769724 | 0.265265705 | -6.35847876 | ns |

|             |             |             |             |             |             |             |    |
|-------------|-------------|-------------|-------------|-------------|-------------|-------------|----|
| MYBPC1      | -0.01933439 | 0.055926679 | -1.29121824 | 0.196647284 | 0.266331201 | -6.37702079 | ns |
| ACADM       | -0.01970478 | 0.12953047  | -1.28941229 | 0.197274324 | 0.267056572 | -6.37124485 | ns |
| CPA2        | -0.01944535 | 0.031789948 | -1.28903517 | 0.197405173 | 0.267096911 | -6.37843289 | ns |
| FGF5        | 0.009974991 | -0.00604983 | 1.288800854 | 0.197487065 | 0.267096911 | -6.36723241 | ns |
| LPP         | -0.01885054 | 0.01550582  | -1.28809993 | 0.197731006 | 0.267303026 | -6.36642058 | ns |
| CCL28       | 0.0172568   | 0.041427269 | 1.287079424 | 0.198086092 | 0.267659134 | -6.37596078 | ns |
| FUT8        | -0.01759096 | 0.050723072 | -1.28673679 | 0.198205552 | 0.267696676 | -6.37539118 | ns |
| AMIGO2      | 0.006690376 | -0.01109965 | 1.284461603 | 0.19899994  | 0.268545859 | -6.3790363  | ns |
| GSTP1       | -0.02014704 | 0.065066671 | -1.28441031 | 0.199018233 | 0.268545859 | -6.37130441 | ns |
| SCRN1       | -0.0167792  | 0.043232895 | -1.28261877 | 0.199645044 | 0.269267219 | -6.38392663 | ns |
| ARID4B      | -0.01256753 | 0.039316032 | -1.28098856 | 0.2002174   | 0.2699145   | -6.37688658 | ns |
| ENPP2       | -0.00786153 | 0.021937929 | -1.28049355 | 0.200390759 | 0.270023543 | -6.39109066 | ns |
| DENR        | 0.016078624 | 0.057299741 | 1.28003512  | 0.200552534 | 0.270116881 | -6.37603656 | ns |
| PPM1B       | -0.01766939 | 0.110689739 | -1.27930301 | 0.200810117 | 0.270339115 | -6.37696817 | ns |
| CGB3_CGB5_C | -0.0118647  | -0.00984943 | -1.27763048 | 0.201398909 | 0.270911474 | -6.39321418 | ns |
| PTPRM       | -0.00720912 | -0.00924396 | -1.27756893 | 0.201420825 | 0.270911474 | -6.38940281 | ns |
| SPARC       | -0.02120873 | -0.10878091 | -1.27521077 | 0.202253842 | 0.271906638 | -6.3952132  | ns |
| MRI1        | -0.0189787  | -0.07440542 | -1.27338911 | 0.202899583 | 0.272649233 | -6.38610904 | ns |
| TGFBR1      | -0.0060833  | 0.001379211 | -1.26873541 | 0.204555089 | 0.274638762 | -6.39035599 | ns |
| C1QTNF6     | -0.00865403 | 0.015246609 | -1.26869678 | 0.204568256 | 0.274638762 | -6.40659405 | ns |
| CLEC3B      | -0.00594648 | 0.000759801 | -1.26669602 | 0.205283541 | 0.275472399 | -6.39612396 | ns |
| CCDC134     | -0.01320374 | 0.025800602 | -1.26567356 | 0.205649063 | 0.275836134 | -6.40847601 | ns |
| LHB         | -0.02581112 | 0.17978426  | -1.26124733 | 0.207239311 | 0.277841501 | -6.40090091 | ns |
| OSBPL2      | -0.01055502 | 0.06493277  | -1.25948223 | 0.20787517  | 0.278566083 | -6.41722773 | ns |
| ITM2A       | -0.01742008 | -0.00060033 | -1.2562891  | 0.209030298 | 0.279983291 | -6.41716773 | ns |
| BRD3        | -0.01320086 | 0.040608058 | -1.2560303  | 0.209124506 | 0.279983291 | -6.40698683 | ns |
| FES         | 0.01392868  | 0.018532069 | 1.255263845 | 0.209402495 | 0.280216543 | -6.40838756 | ns |
| GRK5        | -0.01513383 | 0.073062347 | -1.25502086 | 0.209490655 | 0.280216543 | -6.4094679  | ns |
| AKT3        | -0.01680207 | 0.020927993 | -1.25466543 | 0.209619844 | 0.280260964 | -6.40643462 | ns |
| NFIC        | -0.01196052 | 0.05872239  | -1.24953594 | 0.211487957 | 0.282629214 | -6.43058891 | ns |
| GAMT        | 0.009965759 | 0.048941785 | 1.249131085 | 0.211636583 | 0.282698455 | -6.41558029 | ns |
| MUCL3       | 0.012296148 | 0.075296659 | 1.248086662 | 0.212018774 | 0.283079478 | -6.415125   | ns |
| BPIFB1      | -0.01891704 | -0.01802848 | -1.24528084 | 0.213047664 | 0.284323207 | -6.42649129 | ns |
| TPRKB       | 0.017382928 | 0.082619474 | 1.243250675 | 0.213794876 | 0.285190058 | -6.42111522 | ns |
| ARHGAP1     | 0.013543023 | -0.00398809 | 1.241645009 | 0.214386927 | 0.285849237 | -6.42529501 | ns |
| KIR3DL2     | -0.02323184 | 0.221900985 | -1.24041728 | 0.214840465 | 0.286323213 | -6.42461408 | ns |
| ZNF830      | 0.021928916 | 0.29561881  | 1.239636999 | 0.215128518 | 0.28657631  | -6.44091328 | ns |
| SLAMF7      | -0.01698045 | -0.04434031 | -1.23919949 | 0.215290582 | 0.286582609 | -6.43837439 | ns |
| PXDNL       | 0.015662256 | 0.078730815 | 1.239093935 | 0.215329535 | 0.286582609 | -6.44158267 | ns |
| MED21       | -0.01398338 | 0.072308115 | -1.23768147 | 0.215853523 | 0.287149106 | -6.42973717 | ns |
| LRFN2       | 0.012899153 | 0.057596577 | 1.234053026 | 0.217202333 | 0.288811845 | -6.43515007 | ns |
| ART5        | -0.01673166 | 0.126352444 | -1.23333695 | 0.217469303 | 0.289035214 | -6.43652209 | ns |
| SCARB1      | -0.01684699 | 0.101875395 | -1.23266204 | 0.217721111 | 0.289238237 | -6.4372856  | ns |
| KAZALD1     | -0.0130009  | -0.03563132 | -1.23120532 | 0.218265011 | 0.289828936 | -6.44565491 | ns |
| DLGAP5      | 0.014079631 | 0.113455707 | 1.227801442 | 0.219540131 | 0.291389629 | -6.45736481 | ns |
| MTHFD2      | 0.006841054 | 0.013441766 | 1.226549485 | 0.220010597 | 0.291881391 | -6.45794128 | ns |
| NGFR        | -0.00757245 | 0.000947915 | -1.22508155 | 0.220563125 | 0.292481528 | -6.45977847 | ns |
| S100A3      | -0.01162409 | 0.060646191 | -1.22021564 | 0.222401763 | 0.294785814 | -6.46467015 | ns |
| GP1BB       | -0.01804703 | 0.0065882   | -1.2171253  | 0.223575652 | 0.296207306 | -6.4548268  | ns |
| TREML1      | -0.01394058 | 0.037420251 | -1.21477665 | 0.224469817 | 0.297257082 | -6.47111634 | ns |
| PPME1       | -0.01738948 | -0.01763579 | -1.20323424 | 0.228904309 | 0.302992104 | -6.47951458 | ns |
| CXCL14      | -0.01751168 | 0.046778147 | -1.20276845 | 0.229084788 | 0.303093603 | -6.4738127  | ns |
| PDGFRA      | -0.00784055 | -0.00175355 | -1.20230513 | 0.229263925 | 0.303193234 | -6.48093521 | ns |
| PITHD1      | 0.021175885 | 0.174158417 | 1.198939621 | 0.230570381 | 0.304782939 | -6.47350641 | ns |
| CD200       | 0.007332659 | 0.016014069 | 1.198625799 | 0.230691993 | 0.304805711 | -6.48755951 | ns |
| ICOSLG      | 0.005327119 | 0.003342288 | 1.19556879  | 0.231883409 | 0.306241318 | -6.48865798 | ns |
| BRSK2       | -0.01014804 | 0.068094003 | -1.19469843 | 0.232223131 | 0.30655133  | -6.49724364 | ns |
| PDIA5       | -0.01571253 | 0.027333797 | -1.19420296 | 0.23241744  | 0.306669193 | -6.48055565 | ns |
| TNFSF13     | -0.00721691 | -0.01283804 | -1.19385864 | 0.232551641 | 0.306707675 | -6.49440245 | ns |
| SCGB3A1     | -0.00666424 | 0.007533294 | -1.19318488 | 0.232815665 | 0.306917265 | -6.48534304 | ns |
| CD33        | -0.02234044 | -0.21778005 | -1.18861033 | 0.234611325 | 0.309087962 | -6.50131528 | ns |
| UPK3A       | 0.013137316 | 0.034600832 | 1.188452308 | 0.234673976 | 0.309087962 | -6.49056978 | ns |
| NAPRT       | -0.00866032 | 0.036937627 | -1.18727585 | 0.235137023 | 0.309558209 | -6.50508391 | ns |
| CPB1        | 0.015751742 | 0.031093953 | 1.182545031 | 0.237007635 | 0.311880259 | -6.51106162 | ns |
| SUSD2       | 0.007834517 | 0.000705283 | 1.181286712 | 0.237507123 | 0.312396756 | -6.50843676 | ns |
| IL10RA      | -0.01598322 | 0.098333949 | -1.18093522 | 0.237647053 | 0.31244007  | -6.49968982 | ns |

|             |             |             |             |             |             |             |    |
|-------------|-------------|-------------|-------------|-------------|-------------|-------------|----|
| MAPKAPK2    | -0.01905587 | 0.020175084 | -1.18028307 | 0.237906038 | 0.312639798 | -6.50525896 | ns |
| NTF3        | 0.009711216 | 0.011981507 | 1.178827181 | 0.238485278 | 0.313260014 | -6.51096595 | ns |
| CHRM1       | 0.009586388 | 0.020869204 | 1.177820621 | 0.23888667  | 0.313646167 | -6.50258459 | ns |
| CBLN1       | -0.02458845 | 0.206291956 | -1.17602808 | 0.239602221 | 0.314444263 | -6.50517641 | ns |
| HDAC8       | -0.01613072 | 0.127582516 | -1.17201301 | 0.241210405 | 0.31641257  | -6.50773272 | ns |
| DEFB103A_DE | -0.01058369 | 0.035581048 | -1.17115359 | 0.241555768 | 0.316723325 | -6.504195   | ns |
| LSM8        | -0.02222578 | 0.284035071 | -1.17063369 | 0.24176432  | 0.316854495 | -6.5165389  | ns |
| ARG2        | -0.0108878  | 0.049651298 | -1.17022179 | 0.241929776 | 0.316926721 | -6.52409895 | ns |
| CGN         | -0.01015103 | 0.032727112 | -1.16995754 | 0.242036503 | 0.316926721 | -6.51176354 | ns |
| CEACAM20    | -0.01130285 | 0.044162581 | -1.1696851  | 0.242145977 | 0.316927949 | -6.51764279 | ns |
| GSAP        | -0.02412161 | 0.246874791 | -1.16684351 | 0.243292069 | 0.318285323 | -6.51487138 | ns |
| TSNAX       | -0.0101854  | 0.028248271 | -1.16263843 | 0.244994689 | 0.32036923  | -6.51929761 | ns |
| TLR2        | -0.00588854 | -0.00580661 | -1.16079951 | 0.245741594 | 0.321202083 | -6.52793962 | ns |
| MYH7B       | 0.010953801 | 0.05545574  | 1.156478408 | 0.247503916 | 0.323222973 | -6.52464642 | ns |
| ACP1        | 0.011337414 | 0.062168837 | 1.156248836 | 0.247597761 | 0.323222973 | -6.52598171 | ns |
| GZMB        | 0.017144335 | 0.032553069 | 1.156194056 | 0.247619791 | 0.323222973 | -6.53724595 | ns |
| ACRBP       | -0.00962369 | 0.029913228 | -1.1543987  | 0.248354601 | 0.324037281 | -6.54239041 | ns |
| NAP1L4      | -0.01036463 | -0.02855715 | -1.15311346 | 0.248881685 | 0.324579955 | -6.54248946 | ns |
| MFAP3       | -0.01304153 | 0.035822233 | -1.14890469 | 0.250613524 | 0.32669263  | -6.53630464 | ns |
| ECE1        | 0.009380201 | -0.01220863 | 1.146813525 | 0.251476908 | 0.32767183  | -6.5388539  | ns |
| MORN4       | -0.0197152  | 0.11814595  | -1.1460101  | 0.251809225 | 0.327958491 | -6.53663051 | ns |
| GKN1        | 0.007281565 | -0.02270903 | 1.142758122 | 0.253157248 | 0.32956717  | -6.54198296 | ns |
| CTAG1A_CTAG | -0.01257083 | 0.01151326  | -1.13897711 | 0.254730618 | 0.331329817 | -6.55148119 | ns |
| RAB39B      | -0.02278161 | 0.211991087 | -1.13895958 | 0.254738164 | 0.331329817 | -6.54639517 | ns |
| HNF1A       | -0.01817086 | 0.140364752 | -1.13769992 | 0.255263839 | 0.331865722 | -6.54877602 | ns |
| SCN2A       | -0.01167443 | 0.04412435  | -1.13502521 | 0.2563828   | 0.33317213  | -6.55229271 | ns |
| EDNRB       | -0.01131552 | 0.062912895 | -1.13440597 | 0.256642383 | 0.333361103 | -6.55085919 | ns |
| NCR3L1      | -0.00780645 | -0.00379248 | -1.1335224  | 0.257012513 | 0.333693436 | -6.56606792 | ns |
| DDX25       | 0.009269984 | 0.03802396  | 1.13187959  | 0.257703017 | 0.334441248 | -6.55534411 | ns |
| ACAN        | 0.007524404 | -0.00876062 | 1.130771331 | 0.258169193 | 0.334897398 | -6.56059343 | ns |
| CENPJ       | -0.0175018  | 0.10837507  | -1.13037592 | 0.258335613 | 0.334964472 | -6.56260061 | ns |
| EFCAB2      | -0.00860408 | 0.026918773 | -1.12613567 | 0.260125797 | 0.337135964 | -6.56735836 | ns |
| ARHGEF5     | -0.01834602 | 0.062920942 | -1.12472792 | 0.260722252 | 0.337759084 | -6.56386269 | ns |
| TAP1        | -0.01450868 | 0.077547711 | -1.11829575 | 0.263458298 | 0.341152208 | -6.57610804 | ns |
| DNAJA4      | -0.0177522  | 0.047081841 | -1.1154527  | 0.264673771 | 0.342574207 | -6.58733048 | ns |
| SCG3        | 0.008775133 | 0.010986714 | 1.112603244 | 0.265896283 | 0.344004053 | -6.58547811 | ns |
| FZD10       | -0.01436289 | 0.078663035 | -1.11039134 | 0.266848091 | 0.345082562 | -6.5793013  | ns |
| ITIH5       | -0.01108166 | 0.028145376 | -1.10982116 | 0.267093371 | 0.345246854 | -6.59258326 | ns |
| GBP2        | -0.01534479 | -0.01985941 | -1.10841813 | 0.267698927 | 0.34587649  | -6.58223697 | ns |
| CPA1        | 0.015144082 | 0.018610704 | 1.107540295 | 0.268077575 | 0.346210408 | -6.59648038 | ns |
| FAM171A2    | 0.038340779 | 0.39026599  | 1.107269693 | 0.268194501 | 0.346210408 | -6.59732855 | ns |
| CDH6        | 0.009612255 | 0.002957018 | 1.106821993 | 0.26838829  | 0.34630747  | -6.59057158 | ns |
| MDM1        | -0.00761939 | 0.006545231 | -1.10535084 | 0.269025189 | 0.34697595  | -6.58485446 | ns |
| FBN2        | -0.01434498 | -0.03299428 | -1.10421662 | 0.269516761 | 0.347456486 | -6.58610057 | ns |
| HBQ1        | 0.016186967 | 0.055969472 | 1.103844264 | 0.269677814 | 0.347510687 | -6.60185506 | ns |
| CBLN4       | -0.00791229 | -0.00472011 | -1.09779503 | 0.272311033 | 0.350749103 | -6.60847826 | ns |
| SH3GL3      | -0.02064703 | -0.01478156 | -1.09295763 | 0.27442976  | 0.353322266 | -6.60053391 | ns |
| TPPP3       | -0.01007973 | 0.026668434 | -1.09204065 | 0.274832694 | 0.353685089 | -6.59982728 | ns |
| VCPKMT      | -0.0208076  | 0.200195614 | -1.08833116 | 0.276466398 | 0.355512721 | -6.60070726 | ns |
| ASPEN       | 0.006302391 | 0.007381007 | 1.088262063 | 0.276496367 | 0.355512721 | -6.61717619 | ns |
| C9orf40     | -0.01969143 | 0.072596166 | -1.08772761 | 0.276732331 | 0.355525784 | -6.61665291 | ns |
| MLLT1       | 0.016186629 | 0.080641185 | 1.087688633 | 0.276750037 | 0.355525784 | -6.60140243 | ns |
| VPS28       | -0.0159228  | 0.065348707 | -1.08574938 | 0.277607029 | 0.356324273 | -6.61177762 | ns |
| OPTC        | 0.01155405  | 0.035810386 | 1.085729805 | 0.277615658 | 0.356324273 | -6.61325801 | ns |
| IL31        | 0.013118701 | 0.107510903 | 1.080090173 | 0.280119353 | 0.359379837 | -6.61066462 | ns |
| CCN2        | -0.01473474 | -0.01454191 | -1.07775893 | 0.281158325 | 0.360554373 | -6.62247918 | ns |
| MFAP4       | 0.007323059 | 0.016450145 | 1.076627445 | 0.281663887 | 0.36104414  | -6.61688975 | ns |
| GHRHR       | -0.01383964 | 0.085430385 | -1.07541946 | 0.282204191 | 0.361440444 | -6.61774012 | ns |
| AGT         | 0.005219762 | 0.029067909 | 1.074945223 | 0.282416008 | 0.361440444 | -6.63033467 | ns |
| ITGA2       | 0.007889101 | 0.018631455 | 1.07489949  | 0.282436854 | 0.361440444 | -6.6187383  | ns |
| TRIM21      | -0.0192881  | 0.002997749 | -1.07482903 | 0.282468183 | 0.361440444 | -6.62751425 | ns |
| PSMD5       | 0.012971312 | 0.079579642 | 1.073680311 | 0.282983129 | 0.361940751 | -6.61916816 | ns |
| CD300LG     | 0.009064191 | 0.019753201 | 1.072411099 | 0.283552263 | 0.362509899 | -6.63045385 | ns |
| MAGEA3      | 0.019588325 | -0.08175182 | 1.071950307 | 0.283759297 | 0.362615819 | -6.62658293 | ns |
| ITPA        | -0.01572079 | 0.00633964  | -1.07126692 | 0.284066628 | 0.362746285 | -6.62078634 | ns |
| CD209       | 0.009783259 | 0.0383518   | 1.071169894 | 0.284109847 | 0.362746285 | -6.63151067 | ns |

|           |             |             |             |             |             |             |    |
|-----------|-------------|-------------|-------------|-------------|-------------|-------------|----|
| TBC1D17   | -0.01107597 | 0.041676135 | -1.06655489 | 0.286189968 | 0.365242442 | -6.62718125 | ns |
| RBM17     | -0.01755021 | 0.027297952 | -1.06442316 | 0.287153603 | 0.366312153 | -6.64360215 | ns |
| LAMA1     | 0.012433343 | 0.125759385 | 1.061656228 | 0.288408833 | 0.367752748 | -6.63097872 | ns |
| ERVV-1    | 0.010535467 | 0.046614404 | 1.05994412  | 0.289187052 | 0.368584109 | -6.63278481 | ns |
| BLMH      | -0.00774258 | -0.00352135 | -1.05788093 | 0.290126204 | 0.369619772 | -6.64995655 | ns |
| FABP9     | -0.01378868 | 0.02416113  | -1.05039009 | 0.293555344 | 0.373825383 | -6.65334177 | ns |
| THBS2     | -0.00844922 | 0.012417318 | -1.04987372 | 0.293792682 | 0.37396453  | -6.65423898 | ns |
| SAT2      | -0.01586433 | 0.05538566  | -1.04876375 | 0.294303468 | 0.374451471 | -6.6510339  | ns |
| CD109     | 0.008132368 | -0.00691789 | 1.045887638 | 0.295629361 | 0.375974623 | -6.65839318 | ns |
| IL13RA2   | 0.006470988 | -0.01318803 | 1.044554346 | 0.296245735 | 0.376552003 | -6.65033931 | ns |
| IL5       | 0.03549703  | 0.307193057 | 1.044347689 | 0.296341268 | 0.376552003 | -6.65081859 | ns |
| NMRK2     | 0.009619512 | 0.067304802 | 1.041979502 | 0.29743795  | 0.377781128 | -6.64980316 | ns |
| TIE1      | 0.010163756 | -0.07811984 | 1.040091893 | 0.298313421 | 0.378728344 | -6.66851626 | ns |
| CSF2      | -0.00824447 | 0.012711188 | -1.03724174 | 0.299639892 | 0.38024706  | -6.6564579  | ns |
| SOX2      | 0.005247632 | -0.00078117 | 1.036014815 | 0.300211406 | 0.380806822 | -6.67198797 | ns |
| EXOSC10   | -0.01335055 | 0.148431382 | -1.02813652 | 0.303902156 | 0.385313203 | -6.66580846 | ns |
| MRPL24    | -0.00864536 | 0.013004816 | -1.02786909 | 0.304027952 | 0.385313203 | -6.66608186 | ns |
| CENPF     | -0.01274083 | 0.062890825 | -1.0233189  | 0.306173306 | 0.387863797 | -6.67725108 | ns |
| ARFIP1    | -0.01542355 | 0.050202676 | -1.02002344 | 0.30773324  | 0.389670885 | -6.68962705 | ns |
| TADA3     | -0.00881547 | 0.008539283 | -1.01695318 | 0.309191627 | 0.391236709 | -6.690803   | ns |
| RNF5      | -0.01612547 | -0.09088716 | -1.01685699 | 0.309237782 | 0.391236709 | -6.6782258  | ns |
| CHGB      | -0.00948238 | -0.00350925 | -1.01475933 | 0.31023646  | 0.392330214 | -6.69314523 | ns |
| TSPAN7    | -0.0215831  | 0.292569993 | -1.01420923 | 0.310499197 | 0.392492492 | -6.68140279 | ns |
| PTPN9     | -0.00850227 | 0.02560713  | -1.01148863 | 0.311798929 | 0.393964895 | -6.68093586 | ns |
| MORC3     | 0.006129625 | 0.020092046 | 1.009107314 | 0.312938923 | 0.394934771 | -6.6996884  | ns |
| ITGB5     | 0.008698633 | 0.024052368 | 1.009055213 | 0.312963972 | 0.394934771 | -6.69754402 | ns |
| CDA       | -0.01051742 | 0.005324099 | -1.00903786 | 0.312972281 | 0.394934771 | -6.69864532 | ns |
| PSCA      | 0.056442447 | -1.29913264 | 1.006003872 | 0.314429449 | 0.396602156 | -6.70174343 | ns |
| CSNK1D    | -0.01394437 | 0.102801037 | -1.00490328 | 0.314959597 | 0.397099319 | -6.68861001 | ns |
| PRL       | 0.016919196 | 0.108852202 | 1.002755548 | 0.315994468 | 0.39823213  | -6.70702741 | ns |
| RGS10     | -0.01302128 | 0.050055733 | -1.00171252 | 0.316498074 | 0.398694727 | -6.70803724 | ns |
| FUCA1     | -0.01941826 | -0.2108768  | -0.99962698 | 0.317506724 | 0.399792857 | -6.70743892 | ns |
| MYL6B     | -0.02046136 | 0.267128984 | -0.9980797  | 0.318256688 | 0.400564453 | -6.69704651 | ns |
| RANGAP1   | -0.01153133 | 0.059555221 | -0.99634144 | 0.319100303 | 0.401318006 | -6.69825893 | ns |
| TACC3     | -0.02750886 | -0.05320279 | -0.99627917 | 0.319130278 | 0.401318006 | -6.70586671 | ns |
| ARNTL     | 0.011421882 | 0.106952634 | 0.995361796 | 0.319576354 | 0.401705964 | -6.69878391 | ns |
| GATA3     | 0.00572063  | -0.00430468 | 0.994639314 | 0.319927739 | 0.401974612 | -6.69774112 | ns |
| IL36A     | -0.01220027 | 0.067156102 | -0.9934374  | 0.320512832 | 0.402536546 | -6.70000262 | ns |
| TG        | -0.02386485 | 0.198544512 | -0.99026324 | 0.322060977 | 0.404306987 | -6.71744438 | ns |
| PODXL     | 0.003487355 | -0.00496073 | 0.989051258 | 0.322653706 | 0.40465468  | -6.71300237 | ns |
| FRMD4B    | -0.01563768 | 0.107944685 | -0.98900338 | 0.322677408 | 0.40465468  | -6.70505757 | ns |
| CEP164    | -0.01431098 | 0.098847399 | -0.98884733 | 0.322753681 | 0.40465468  | -6.70692748 | ns |
| ANGPT1    | -0.0196505  | -0.07270749 | -0.98823664 | 0.323052405 | 0.404855374 | -6.71326401 | ns |
| HBZ       | -0.02288107 | 0.091404729 | -0.98790488 | 0.323214666 | 0.404884953 | -6.72079258 | ns |
| PRKCQ     | -0.00998233 | 0.043364403 | -0.97989512 | 0.327153586 | 0.409643426 | -6.71569099 | ns |
| SYT1      | -0.00836518 | 0.032338692 | -0.97622953 | 0.328965966 | 0.411736229 | -6.73214902 | ns |
| NGF       | 0.002724436 | -0.00377047 | 0.974691851 | 0.329728576 | 0.4125139   | -6.72628524 | ns |
| TYRP1     | 0.013071024 | -0.04533902 | 0.974219774 | 0.329963102 | 0.412630517 | -6.71880428 | ns |
| SERPINA9  | -0.01614209 | 0.001594051 | -0.97287152 | 0.330632634 | 0.413290793 | -6.72621149 | ns |
| AHSP      | -0.01977757 | -0.00631884 | -0.97078742 | 0.331669461 | 0.414310354 | -6.73274443 | ns |
| BRD2      | -0.00726041 | 0.017556094 | -0.97066227 | 0.331732057 | 0.414310354 | -6.7243809  | ns |
| BCAM      | 0.005322511 | 0.002000712 | 0.965539664 | 0.334289772 | 0.417326265 | -6.73876079 | ns |
| C1GALT1C1 | 0.006807609 | 0.008485413 | 0.964454029 | 0.334833861 | 0.417826869 | -6.72890242 | ns |
| HIP1      | -0.00709466 | 0.038352973 | -0.9641599  | 0.334981277 | 0.417832263 | -6.72918448 | ns |
| CCT5      | -0.0104184  | 0.05462942  | -0.96343245 | 0.335346035 | 0.418108634 | -6.73032704 | ns |
| B3GNT7    | -0.00759791 | -0.0376696  | -0.96170188 | 0.3362148   | 0.419012896 | -6.73248701 | ns |
| AOC1      | -0.01278563 | 0.084091405 | -0.95912295 | 0.337512159 | 0.4204503   | -6.73571833 | ns |
| UBE2B     | -0.00606863 | 0.012489597 | -0.95810573 | 0.338024436 | 0.420908893 | -6.74860242 | ns |
| IL1A      | -0.012596   | 0.074834604 | -0.95562731 | 0.339275849 | 0.422287076 | -6.73904645 | ns |
| LYPD8     | 0.011051795 | -0.00238495 | 0.952155042 | 0.341033657 | 0.424294111 | -6.74106855 | ns |
| SEMA7A    | -0.00589481 | 0.004378665 | -0.95106874 | 0.34158436  | 0.424798268 | -6.75445372 | ns |
| ATP1B2    | 0.006440436 | 0.018758175 | 0.949097356 | 0.342586357 | 0.425715449 | -6.74351374 | ns |
| PPT1      | -0.01625676 | 0.199648092 | -0.94904389 | 0.342613461 | 0.425715449 | -6.74452125 | ns |
| DYNC1H1   | 0.00985399  | 0.047359834 | 0.947659417 | 0.343317689 | 0.426409039 | -6.75850276 | ns |
| GPIHBP1   | -0.01445869 | -0.08396748 | -0.94717385 | 0.343564999 | 0.426534777 | -6.75888561 | ns |
| TREH      | -0.01561048 | -0.05782232 | -0.94651421 | 0.343901148 | 0.426770656 | -6.76015992 | ns |



|          |             |             |             |             |             |             |    |
|----------|-------------|-------------|-------------|-------------|-------------|-------------|----|
| TEX101   | 0.010133764 | 0.099581517 | 0.944984086 | 0.344682105 | 0.427429703 | -6.74834464 | ns |
| S100G    | 0.009398034 | 0.06627761  | 0.944531934 | 0.344912592 | 0.427429703 | -6.76338139 | ns |
| CTRL     | 0.013513674 | -0.00451214 | 0.944109383 | 0.34512847  | 0.427429703 | -6.76282352 | ns |
| TNN      | -0.00886879 | 0.013738185 | -0.94384916 | 0.345261462 | 0.427429703 | -6.76266529 | ns |
| SIGLEC9  | -0.00654854 | -0.02995732 | -0.94383956 | 0.345266353 | 0.427429703 | -6.76425927 | ns |
| KIAA0319 | -0.00621374 | 0.017264363 | -0.94375318 | 0.345310503 | 0.427429703 | -6.76315794 | ns |
| ALMS1    | -0.00911102 | 0.03938938  | -0.94057515 | 0.346937502 | 0.429261655 | -6.75805555 | ns |
| PPIF     | -0.01265709 | 0.089731501 | -0.93980795 | 0.347330741 | 0.429566185 | -6.76645089 | ns |
| ATP1B4   | 0.008663651 | 0.04827829  | 0.939473447 | 0.347502823 | 0.429597055 | -6.75079229 | ns |
| PDGFRB   | -0.00767141 | -0.0410986  | -0.93547756 | 0.349556806 | 0.431953395 | -6.77129559 | ns |
| KRT6C    | -0.00773774 | 0.040945078 | -0.93407856 | 0.350278376 | 0.432610443 | -6.75757677 | ns |
| RAB37    | -0.0183528  | 0.193401466 | -0.93387204 | 0.350384828 | 0.432610443 | -6.75948604 | ns |
| IMPA1    | -0.01327214 | 0.039305942 | -0.93092541 | 0.351906867 | 0.434306024 | -6.76775812 | ns |
| HMGCS1   | 0.008867136 | 0.023525376 | 0.930454494 | 0.352150757 | 0.434423409 | -6.76093661 | ns |
| TOP1MT   | -0.01012807 | 0.038744892 | -0.92900183 | 0.352903062 | 0.435167627 | -6.76052079 | ns |
| AMDHD2   | 0.005174797 | -0.03569156 | 0.927033861 | 0.353923404 | 0.436241595 | -6.77831018 | ns |
| JMJD1C   | -0.01159236 | 0.054007275 | -0.92662468 | 0.354136321 | 0.436319855 | -6.76271406 | ns |
| DCTPP1   | 0.006534083 | -0.01273703 | 0.922932985 | 0.356056676 | 0.438500841 | -6.77617586 | ns |
| EXTL1    | 0.009738551 | 0.074238247 | 0.921550121 | 0.356778076 | 0.439204039 | -6.76913633 | ns |
| C1QBP    | -0.01367351 | 0.112604731 | -0.92089086 | 0.357121721 | 0.439441815 | -6.78531309 | ns |
| GNPDA1   | -0.0065047  | 0.029462089 | -0.92040714 | 0.357374765 | 0.43956795  | -6.77113233 | ns |
| ATP1B1   | 0.009859431 | 0.0610765   | 0.919201182 | 0.358005102 | 0.440157852 | -6.77128624 | ns |
| PCDHB15  | -0.00789832 | 0.013597725 | -0.91833093 | 0.358459975 | 0.440325617 | -6.78571836 | ns |
| KIAA1549 | -0.0137659  | -0.01014461 | -0.91824479 | 0.358505228 | 0.440325617 | -6.77869595 | ns |
| DCN      | 0.004565497 | -0.00308751 | 0.917891263 | 0.358690489 | 0.440325617 | -6.77370859 | ns |
| ADD1     | -0.01430956 | 0.017132858 | -0.9177875  | 0.35874474  | 0.440325617 | -6.774409   | ns |
| FOLR1    | -0.00571479 | 0.006530722 | -0.91229229 | 0.361629169 | 0.443679484 | -6.78782211 | ns |
| SLC34A3  | -0.00994465 | 0.03523829  | -0.91172525 | 0.361927998 | 0.443859619 | -6.776333   | ns |
| NUDT10   | 0.004776796 | 0.022348909 | 0.907802065 | 0.363997315 | 0.446209975 | -6.78259089 | ns |
| ANKMY2   | -0.01597346 | 0.016214311 | -0.90523143 | 0.365357297 | 0.447689177 | -6.78327408 | ns |
| IL6ST    | -0.00366622 | -0.00855254 | -0.90428994 | 0.36585591  | 0.448112104 | -6.79311544 | ns |
| OFD1     | -0.01288243 | 0.153501516 | -0.90335948 | 0.36634939  | 0.448528393 | -6.79217931 | ns |
| FSHB     | 0.012928733 | 0.487550514 | 0.9025405   | 0.366784235 | 0.448833245 | -6.78732715 | ns |
| ART3     | 0.006965982 | 0.031598704 | 0.902311063 | 0.366905806 | 0.448833245 | -6.79620238 | ns |
| NFKB2    | -0.01125576 | 0.103181734 | -0.90101221 | 0.36759604  | 0.449489295 | -6.79428539 | ns |
| NME1     | 0.004172361 | 0.006782124 | 0.899700904 | 0.368293851 | 0.450154058 | -6.78823748 | ns |
| ADGRE2   | -0.00584987 | -0.00303074 | -0.89639517 | 0.370055744 | 0.452118315 | -6.80359955 | ns |
| VWC2L    | 0.009219904 | 0.087433601 | 0.894448274 | 0.371095961 | 0.453199585 | -6.80918521 | ns |
| CD248    | -0.00770537 | 0.007250087 | -0.89375753 | 0.371465531 | 0.453461267 | -6.80844152 | ns |
| TEF      | 0.008379975 | 0.016446648 | 0.891789779 | 0.372519895 | 0.454558334 | -6.79596949 | ns |
| ARHGAP30 | -0.00787773 | 0.08474333  | -0.89131813 | 0.372772574 | 0.454676657 | -6.80292535 | ns |
| RBM19    | -0.00920066 | 0.061012731 | -0.89044338 | 0.373242108 | 0.455059271 | -6.79716263 | ns |
| TP53INP1 | 0.006820769 | 0.047242235 | 0.888984562 | 0.37402557  | 0.45582415  | -6.79967953 | ns |
| KLRC1    | 0.011706575 | 0.097034294 | 0.887645105 | 0.374745842 | 0.456457972 | -6.80108983 | ns |
| SLITRK6  | -0.00707016 | 0.001927655 | -0.88732276 | 0.374919321 | 0.456457972 | -6.8011473  | ns |
| ARG1     | 0.011026971 | 0.014040779 | 0.887145306 | 0.375014614 | 0.456457972 | -6.80900793 | ns |
| GFOD2    | 0.026485914 | 0.48734443  | 0.885396961 | 0.375956724 | 0.457414014 | -6.80206431 | ns |
| MAN1A2   | 0.00497424  | -0.00399554 | 0.884780439 | 0.37628917  | 0.457627812 | -6.80311078 | ns |
| COL5A1   | 0.007315611 | 0.026862329 | 0.879882066 | 0.378937162 | 0.460501331 | -6.80829149 | ns |
| KIF20B   | 0.014810594 | 0.062821701 | 0.879826436 | 0.378967363 | 0.460501331 | -6.80796127 | ns |
| CD200R1  | -0.00717486 | 0.016221367 | -0.8793441  | 0.379228552 | 0.460627026 | -6.81569939 | ns |
| KCNC4    | 0.010827221 | 0.109911548 | 0.878263273 | 0.379814856 | 0.461147352 | -6.80932777 | ns |
| NUDT15   | -0.00984163 | 0.061754334 | -0.87682076 | 0.380598013 | 0.461906151 | -6.80913329 | ns |
| STX5     | -0.007824   | 0.040134448 | -0.87652959 | 0.380756202 | 0.461906152 | -6.80870203 | ns |
| CDH22    | 0.005421247 | 0.013496106 | 0.872136788 | 0.383147474 | 0.464614046 | -6.81974554 | ns |
| IGFBP7   | -0.00563232 | -0.01732856 | -0.87105553 | 0.383737312 | 0.464849197 | -6.82917274 | ns |
| TDGF1    | 0.029501182 | 0.194851732 | 0.870950444 | 0.383795087 | 0.464849197 | -6.81562399 | ns |
| ZP4      | 0.006470908 | 0.038133797 | 0.870906768 | 0.383818977 | 0.464849197 | -6.81251274 | ns |
| CYB5A    | -0.0136389  | 0.073296799 | -0.86884705 | 0.384944673 | 0.465910667 | -6.81429447 | ns |
| SYNGAP1  | 0.010921276 | 0.080529715 | 0.868719255 | 0.385014534 | 0.465910667 | -6.81761832 | ns |
| SOWAHA   | 0.009297407 | 0.065157369 | 0.864290446 | 0.387442073 | 0.46865404  | -6.82093904 | ns |
| BCL2L11  | -0.00879389 | -0.07996345 | -0.86089324 | 0.389310297 | 0.470718869 | -6.8334484  | ns |
| ZCCHC8   | -0.0113082  | 0.078328402 | -0.86057341 | 0.389486764 | 0.470737314 | -6.82316911 | ns |
| CLU      | -0.00597265 | 0.027943405 | -0.85989876 | 0.389858155 | 0.470991234 | -6.83845718 | ns |
| GLT8D2   | -0.00920453 | 0.061756019 | -0.8543936  | 0.392900526 | 0.474470445 | -6.82982819 | ns |
| GBP6     | -0.0080997  | 0.046211873 | -0.85217211 | 0.394132152 | 0.47576101  | -6.83032389 | ns |

|          |             |              |             |             |             |             |    |
|----------|-------------|--------------|-------------|-------------|-------------|-------------|----|
| ZNF174   | -0.00677311 | 0.051263643  | -0.84803605 | 0.396431397 | 0.47833871  | -6.8331352  | ns |
| IL10     | -0.01608511 | 0.056158783  | -0.84409178 | 0.39863149  | 0.480794692 | -6.8388581  | ns |
| CA11     | -0.00601618 | 0.047150199  | -0.84064971 | 0.400557562 | 0.482918283 | -6.84046844 | ns |
| CD40LG   | -0.01534815 | -0.04097146  | -0.83900915 | 0.40147709  | 0.483827116 | -6.85704258 | ns |
| NRXN3    | -0.00655099 | 0.05584233   | -0.83375903 | 0.404429961 | 0.487184606 | -6.84671765 | ns |
| IL4      | -0.01741216 | -0.15304078  | -0.83178396 | 0.405544048 | 0.488325204 | -6.84911437 | ns |
| CXCL8    | -0.01298452 | -0.00524954  | -0.82711181 | 0.408186603 | 0.491304568 | -6.86029172 | ns |
| FRMD7    | 0.005909736 | -0.00560272  | 0.826388457 | 0.408596813 | 0.491441632 | -6.85280196 | ns |
| KIR2DL3  | -0.01465363 | 0.005696045  | -0.82631756 | 0.408637083 | 0.491441632 | -6.85234797 | ns |
| GPA33    | 0.026600489 | 0.084181281  | 0.82592301  | 0.408860647 | 0.491508064 | -6.86023115 | ns |
| PPP1R14D | 0.006731096 | 0.021593085  | 0.825201079 | 0.409270121 | 0.491797841 | -6.86840593 | ns |
| TLR3     | -0.01188865 | -0.12203715  | -0.82444712 | 0.409698209 | 0.492109737 | -6.86908923 | ns |
| TCP11    | -0.0107507  | 0.119664768  | -0.82302934 | 0.410504163 | 0.492875065 | -6.86114063 | ns |
| FGF16    | 0.008505062 | 0.023372222  | 0.822024161 | 0.411076181 | 0.493359001 | -6.85473546 | ns |
| CCS      | 0.009044594 | 0.028143193  | 0.819241695 | 0.412661316 | 0.495044068 | -6.86495685 | ns |
| MEP1B    | -0.02280492 | -0.20000856  | -0.81883189 | 0.41289508  | 0.495044068 | -6.86634155 | ns |
| DUSP29   | -0.01157638 | 0.098036284  | -0.81866791 | 0.412988819 | 0.495044068 | -6.85911724 | ns |
| TAB2     | -0.01932275 | 0.011923119  | -0.81724782 | 0.413799571 | 0.495729152 | -6.86585636 | ns |
| TERF1    | 0.005056312 | 0.013963673  | 0.817072598 | 0.413899888 | 0.495729152 | -6.858771   | ns |
| NXPE4    | 0.006061909 | 0.033016579  | 0.814594024 | 0.415317637 | 0.497223247 | -6.86146741 | ns |
| CSNK2A1  | 0.007985831 | 0.038722309  | 0.813508453 | 0.415939079 | 0.49776316  | -6.87793493 | ns |
| BTN1A1   | 0.006985523 | 0.047315714  | 0.811759644 | 0.416942092 | 0.498759077 | -6.87636606 | ns |
| MEGF11   | -0.00582398 | 0.039142756  | -0.80691813 | 0.419726417 | 0.501884167 | -6.86765624 | ns |
| TLR1     | 0.004565016 | 0.003647543  | 0.805855231 | 0.420339072 | 0.502411007 | -6.86782304 | ns |
| SKIV2L   | -0.0068303  | 0.03970892   | -0.80475184 | 0.420975625 | 0.502965968 | -6.86939225 | ns |
| KCNH2    | -0.01325829 | 0.214804303  | -0.80263805 | 0.422196591 | 0.504033095 | -6.87204011 | ns |
| ANGPT2   | -0.00712642 | -0.00772069  | -0.80260732 | 0.422214024 | 0.504033095 | -6.88745874 | ns |
| PI16     | -0.0042124  | -0.005984555 | -0.80225999 | 0.422414898 | 0.504066817 | -6.88489496 | ns |
| TEK      | -0.00391614 | 0.00625458   | -0.7971777  | 0.425360097 | 0.507373972 | -6.88785894 | ns |
| DPEP2    | -0.00479832 | -0.00543528  | -0.79422883 | 0.427074549 | 0.509210977 | -6.88576599 | ns |
| VTA1     | -0.01325559 | 0.019069895  | -0.79032793 | 0.429348366 | 0.511713154 | -6.89645408 | ns |
| PRR4     | -0.01208846 | 0.058512286  | -0.78931654 | 0.429939467 | 0.512208586 | -6.88007968 | ns |
| SPINT3   | 0.025162897 | 0.982776912  | 0.785455766 | 0.43219843  | 0.51468981  | -6.89822886 | ns |
| LXN      | -0.01185221 | 0.101115315  | -0.78487924 | 0.432536618 | 0.514882562 | -6.88979063 | ns |
| ARID3A   | -0.00686882 | 0.033694877  | -0.78089351 | 0.434877387 | 0.517458016 | -6.88965764 | ns |
| TRIM40   | -0.01225552 | 0.036227833  | -0.77987454 | 0.435476935 | 0.517960347 | -6.8899524  | ns |
| ARHGAP5  | -0.01283425 | 0.160408679  | -0.77782136 | 0.436686583 | 0.519187631 | -6.88882262 | ns |
| LYZL2    | 0.006063298 | 0.034659601  | 0.77738009  | 0.436946796 | 0.519253543 | -6.88916385 | ns |
| SLC12A2  | -0.00448462 | 0.01478247   | -0.77712429 | 0.437097674 | 0.519253543 | -6.89112303 | ns |
| MFASC    | -0.00482884 | -0.0135977   | -0.77608439 | 0.437710978 | 0.519619456 | -6.90758471 | ns |
| HMBS     | -0.00797783 | -0.02120055  | -0.77599867 | 0.437761597 | 0.519619456 | -6.90834858 | ns |
| XPNPEP2  | 0.017624771 | -0.08891704  | 0.770964681 | 0.440739667 | 0.522941823 | -6.90830091 | ns |
| MYOM2    | 0.008308503 | 0.048417307  | 0.769154317 | 0.441813791 | 0.524003359 | -6.89725084 | ns |
| TPBGL    | -0.00699635 | 0.053055573  | -0.76656692 | 0.443351022 | 0.525613067 | -6.90018533 | ns |
| DCLRE1C  | 0.005317311 | 0.012530805  | 0.764726947 | 0.444446168 | 0.526697569 | -6.89886595 | ns |
| ISLR2    | 0.006625778 | -0.00849424  | 0.753991019 | 0.450866447 | 0.533953965 | -6.90779372 | ns |
| SULT1A1  | -0.0229708  | -0.14694227  | -0.75371766 | 0.451030218 | 0.533953965 | -6.92456654 | ns |
| EP300    | -0.00487522 | 0.001158383  | -0.75357218 | 0.451117956 | 0.533953965 | -6.90836303 | ns |
| STX1B    | -0.00702295 | 0.03973848   | -0.75300198 | 0.451460453 | 0.534142837 | -6.91043487 | ns |
| CEP350   | 0.006186176 | 0.013706483  | 0.751185181 | 0.452552984 | 0.535218596 | -6.90907305 | ns |
| NAGPA    | -0.00347981 | -0.00723809  | -0.75074791 | 0.45281605  | 0.535312901 | -6.91299579 | ns |
| ISM2     | 0.0069416   | 0.006836245  | 0.747644959 | 0.454685693 | 0.537305635 | -6.92771106 | ns |
| TRPV3    | 0.008090063 | 0.049848417  | 0.744946859 | 0.456315492 | 0.539013446 | -6.91547578 | ns |
| DIPK1C   | 0.006901397 | 0.053822815  | 0.74349603  | 0.45719298  | 0.539831582 | -6.91750844 | ns |
| EDF1     | -0.0112792  | 0.083597385  | -0.74184815 | 0.458190568 | 0.540790808 | -6.93336482 | ns |
| POMC     | -0.01115487 | -0.02480853  | -0.74028856 | 0.459136447 | 0.541688252 | -6.91986674 | ns |
| NOS2     | -0.00648408 | 0.013017128  | -0.73949221 | 0.459619718 | 0.541877984 | -6.91950195 | ns |
| KIAA2013 | -0.00945594 | 0.130391587  | -0.73941147 | 0.459668413 | 0.541877984 | -6.9332205  | ns |
| IL34     | 0.006013661 | -0.02777598  | 0.734901712 | 0.462410811 | 0.544890867 | -6.92356352 | ns |
| GTF2IRD1 | 0.011846187 | 0.201916723  | 0.733578271 | 0.463217072 | 0.545620755 | -6.93038063 | ns |
| PNPT1    | 0.020947586 | 0.41178701   | 0.730437944 | 0.46513386  | 0.547491137 | -6.92784042 | ns |
| GIMAP7   | 0.004867343 | 0.012774345  | 0.730362437 | 0.46517997  | 0.547491137 | -6.92800921 | ns |
| NUP50    | 0.005132469 | 0.034373407  | 0.727684877 | 0.466817843 | 0.549197463 | -6.92811579 | ns |
| CD82     | 0.006670155 | 0.063498084  | 0.725998842 | 0.46785061  | 0.550190809 | -6.93588184 | ns |
| LY75     | -0.00660159 | -0.02239787  | -0.71902535 | 0.472136248 | 0.554933672 | -6.94491115 | ns |
| CSRP3    | 0.015091408 | 0.120643488  | 0.718818779 | 0.472263758 | 0.554933672 | -6.93449278 | ns |

|          |             |             |             |             |             |             |    |
|----------|-------------|-------------|-------------|-------------|-------------|-------------|----|
| ATXN2    | -0.01771645 | 0.226510673 | -0.71808985 | 0.472713016 | 0.555238136 | -6.93646898 | ns |
| DNLZ     | 0.014296289 | 0.235143263 | 0.716743897 | 0.473543236 | 0.555989646 | -6.93742926 | ns |
| EHD3     | -0.01823906 | -0.09078662 | -0.71476485 | 0.474765422 | 0.557200576 | -6.93833349 | ns |
| PCARE    | -0.01307024 | 0.190017493 | -0.71356481 | 0.475507365 | 0.55784713  | -6.93969027 | ns |
| IFIT3    | -0.0058779  | 0.031379092 | -0.71174765 | 0.476631928 | 0.55894186  | -6.94607076 | ns |
| PRC1     | -0.00708152 | 0.072129964 | -0.70708841 | 0.479522201 | 0.562105511 | -6.95647246 | ns |
| RTBDN    | 0.004742746 | 0.002371294 | 0.704921213 | 0.480869999 | 0.563459229 | -6.95234453 | ns |
| PRSS2    | -0.00834687 | 0.007863912 | -0.70347257 | 0.481771961 | 0.564289662 | -6.95498145 | ns |
| KLK3     | -0.01314244 | 0.561798654 | -0.70268098 | 0.482265145 | 0.564640827 | -6.96014215 | ns |
| KLK4     | -0.00972082 | 0.014642121 | -0.7018868  | 0.482760284 | 0.564994    | -6.96282006 | ns |
| VSIG10   | -0.00527176 | 0.022119706 | -0.70117251 | 0.483205923 | 0.56528898  | -6.96061563 | ns |
| CD177    | -0.02099107 | -0.24156238 | -0.70026166 | 0.483774527 | 0.565727521 | -6.95768623 | ns |
| MANEAL   | 0.007752383 | -0.01158438 | 0.695086603 | 0.48701178  | 0.569285188 | -6.94941497 | ns |
| PECR     | -0.00433561 | 0.021820899 | -0.69464942 | 0.487285737 | 0.569377492 | -6.95243082 | ns |
| CUZD1    | -0.00560085 | 0.048279027 | -0.69266659 | 0.488529455 | 0.570602403 | -6.95380681 | ns |
| CTSC     | -0.00673397 | 0.006153173 | -0.69059164 | 0.489832681 | 0.571889692 | -6.96227611 | ns |
| CAPN3    | 0.005812061 | 0.041324709 | 0.690192225 | 0.490083679 | 0.571889692 | -6.96821337 | ns |
| SFTPD    | -0.01072479 | -0.00148899 | -0.68985161 | 0.490297967 | 0.571889692 | -6.96310767 | ns |
| RTKN2    | 0.007690315 | 0.068110995 | 0.689665844 | 0.490414996 | 0.571889692 | -6.95491009 | ns |
| TMEM132A | -0.00954852 | 0.003499861 | -0.6889226  | 0.490882577 | 0.572206437 | -6.95637071 | ns |
| RNF168   | -0.00621994 | 0.034100253 | -0.68497551 | 0.493369936 | 0.574876382 | -6.9574298  | ns |
| EPHA10   | -0.01017542 | 0.094182104 | -0.68132164 | 0.495678466 | 0.577335908 | -6.96198981 | ns |
| TNFSF12  | -0.00451172 | 0.020499813 | -0.67915836 | 0.49704765  | 0.578577006 | -6.97773244 | ns |
| EDIL3    | 0.005728433 | -0.00434516 | 0.679012596 | 0.497140311 | 0.578577006 | -6.96338866 | ns |
| COL28A1  | -0.01098197 | 0.109267738 | -0.6725106  | 0.501268975 | 0.583149564 | -6.96748922 | ns |
| CD3G     | 0.013392081 | 0.247847091 | 0.670708807 | 0.502416354 | 0.584251594 | -6.96704689 | ns |
| FHIP2A   | -0.00699005 | 0.014918149 | -0.66852025 | 0.503811827 | 0.585641136 | -6.96919062 | ns |
| NDRG1    | -0.01088228 | 0.134455926 | -0.6664593  | 0.505127777 | 0.58693717  | -6.97195025 | ns |
| LYVE1    | -0.00278875 | 0.000175936 | -0.66608384 | 0.505367429 | 0.586982057 | -6.9855422  | ns |
| IL12RB2  | 0.006148418 | 0.076340952 | 0.665423154 | 0.505790087 | 0.587239385 | -6.97055853 | ns |
| EDEM2    | -0.00533771 | 0.051127624 | -0.66421716 | 0.506561519 | 0.587800394 | -6.97204223 | ns |
| AHSA1    | -0.0097621  | 0.104091082 | -0.66403802 | 0.506675887 | 0.587800394 | -6.98582763 | ns |
| ANGPTL1  | 0.004454723 | 0.012677382 | 0.659634933 | 0.509498226 | 0.590839881 | -6.97444254 | ns |
| MAG      | -0.00669023 | -0.02653284 | -0.65321089 | 0.513630268 | 0.59539515  | -6.98021175 | ns |
| JCHAIN   | -0.00933375 | -0.03091229 | -0.64528223 | 0.518754105 | 0.601096027 | -6.98609324 | ns |
| ADGRD1   | 0.005281084 | -0.01126659 | 0.644581712 | 0.519208052 | 0.601383384 | -6.98665655 | ns |
| TJP3     | 0.005875203 | 0.033083203 | 0.643465848 | 0.519931654 | 0.601982724 | -6.98699161 | ns |
| PDIA2    | -0.00575977 | 0.033149884 | -0.64289241 | 0.520303726 | 0.602174745 | -6.98413887 | ns |
| CD3D     | -0.00455922 | 0.032253359 | -0.64057307 | 0.521809837 | 0.603678575 | -6.98883861 | ns |
| DDX53    | -0.00505711 | 0.00335894  | -0.63685977 | 0.524225831 | 0.606233436 | -6.9907007  | ns |
| RNF31    | -0.00507563 | 0.023818947 | -0.63442057 | 0.525816043 | 0.607831689 | -6.99059642 | ns |
| FLT3LG   | -0.00482215 | -0.01131521 | -0.62544182 | 0.531690313 | 0.614378993 | -7.01258432 | ns |
| MRPL52   | -0.00346978 | -0.00228687 | -0.62400796 | 0.532631858 | 0.615223506 | -6.99470296 | ns |
| CASP9    | -0.00836861 | 0.027052238 | -0.62334525 | 0.533067124 | 0.615482801 | -6.99752302 | ns |
| FGF3     | 0.004144525 | 0.022298657 | 0.617858093 | 0.536678244 | 0.619335367 | -7.00090954 | ns |
| TPMT     | 0.01045333  | 0.073347866 | 0.617630903 | 0.536828019 | 0.619335367 | -7.0021824  | ns |
| SH3BGRL2 | -0.0083051  | 0.113726286 | -0.61548999 | 0.538240469 | 0.620719656 | -7.00450491 | ns |
| TSLP     | -0.00889695 | 0.094718357 | -0.61138153 | 0.540956251 | 0.623605311 | -7.00678379 | ns |
| CEACAM1  | 0.002924791 | -0.00458456 | 0.609341211 | 0.542307265 | 0.624916027 | -7.01924489 | ns |
| LYAR     | -0.00781304 | 0.053242901 | -0.60740569 | 0.543590882 | 0.626148077 | -7.00841101 | ns |
| CSH1     | 0.004114075 | -0.01500649 | 0.606196051 | 0.544393464 | 0.626825282 | -7.02222622 | ns |
| CLASP1   | -0.00989279 | 0.108088646 | -0.60451781 | 0.545508564 | 0.627750906 | -7.00794078 | ns |
| TNNI3    | 0.011764446 | -0.10155824 | 0.604339081 | 0.545627328 | 0.627750906 | -7.01104106 | ns |
| ACOX1    | -0.00689552 | 0.023873932 | -0.60386146 | 0.5459447   | 0.627868659 | -7.01842904 | ns |
| CCL11    | -0.00541473 | -0.02863414 | -0.60182829 | 0.547297228 | 0.629176341 | -7.02699695 | ns |
| MYLPF    | -0.0061905  | 0.075472313 | -0.5997051  | 0.548711776 | 0.630554264 | -7.01354629 | ns |
| KIRREL2  | 0.005529531 | 0.000188261 | 0.598845681 | 0.549284799 | 0.630964442 | -7.01449079 | ns |
| VTCN1    | 0.004220863 | 0.000449847 | 0.597630092 | 0.550095777 | 0.63164753  | -7.01426853 | ns |
| CDK1     | -0.00477648 | -0.01174814 | -0.59540523 | 0.551581601 | 0.633104667 | -7.01337771 | ns |
| ENO2     | -0.00919047 | 0.024600322 | -0.59465941 | 0.552079832 | 0.633427548 | -7.0312279  | ns |
| MSLNL    | 0.004762435 | 0.029639386 | 0.592202351 | 0.553723954 | 0.635064393 | -7.01799297 | ns |
| APRT     | -0.00666215 | -0.04580861 | -0.58832124 | 0.55632539  | 0.637797463 | -7.02658944 | ns |
| COL9A1   | -0.0061558  | 0.032680861 | -0.58755224 | 0.556841521 | 0.638138635 | -7.03033689 | ns |
| LYPD1    | -0.0087553  | 0.163751606 | -0.58380299 | 0.559361602 | 0.640775158 | -7.02333698 | ns |
| METAP1   | -0.00408915 | 0.010479665 | -0.58149751 | 0.560913894 | 0.6423014   | -7.02467289 | ns |
| MORF4L1  | 0.005130384 | 0.042431567 | 0.580536548 | 0.561561416 | 0.642790802 | -7.03038994 | ns |

|           |             |             |             |             |             |             |    |
|-----------|-------------|-------------|-------------|-------------|-------------|-------------|----|
| ACRV1     | -0.00931033 | 0.3736473   | -0.57755352 | 0.563574242 | 0.644842001 | -7.02486677 | ns |
| NPPB      | 0.016900541 | -0.10626043 | 0.574873494 | 0.565385441 | 0.646660983 | -7.02831858 | ns |
| THSD1     | 0.004230428 | 0.00957023  | 0.573673498 | 0.566197427 | 0.647336135 | -7.02309612 | ns |
| RAP1A     | -0.00837133 | 0.117862017 | -0.57093018 | 0.568055505 | 0.649206292 | -7.02864917 | ns |
| GLP1R     | 0.004551602 | 0.040982294 | 0.568649924 | 0.569602207 | 0.650719266 | -7.03208502 | ns |
| ANP32C    | -0.00515881 | 0.067964884 | -0.56799274 | 0.570048355 | 0.650974266 | -7.03195145 | ns |
| SSBP1     | 0.004431492 | 0.023045651 | 0.567117741 | 0.570642657 | 0.651398186 | -7.03080657 | ns |
| ICAM5     | 0.006064491 | -0.04201857 | 0.566471098 | 0.57108188  | 0.651644818 | -7.04018996 | ns |
| GADD45B   | -0.00614703 | 0.073312096 | -0.56428865 | 0.572565997 | 0.65300154  | -7.03963983 | ns |
| RNF43     | -0.0072949  | 0.106206631 | -0.56406507 | 0.572718131 | 0.65300154  | -7.03976528 | ns |
| SPINK5    | -0.00432952 | 0.02931036  | -0.56195171 | 0.574157115 | 0.654386719 | -7.04533086 | ns |
| GSTM4     | 0.008837611 | 0.149705727 | 0.559615422 | 0.575750121 | 0.655946295 | -7.03569664 | ns |
| ENOPH1    | 0.006527535 | 0.092678459 | 0.556734324 | 0.577717026 | 0.657930466 | -7.05097279 | ns |
| SNED1     | -0.00382766 | 0.001627895 | -0.5558974  | 0.578289241 | 0.658325374 | -7.03871097 | ns |
| SIRT5     | 0.007164889 | 0.092522442 | 0.552196249 | 0.580822094 | 0.660951096 | -7.04119091 | ns |
| SCP2      | 0.010043782 | 0.213841977 | 0.551403775 | 0.581365104 | 0.661311298 | -7.04068004 | ns |
| TMPRSS11B | -0.00927191 | 0.181872052 | -0.54904903 | 0.582979932 | 0.662889954 | -7.04297876 | ns |
| NXPH1     | -0.00489415 | 0.010402595 | -0.54843346 | 0.583402435 | 0.663112149 | -7.04325025 | ns |
| CEP112    | -0.00528608 | 0.066259552 | -0.54507392 | 0.585710767 | 0.665476825 | -7.0436843  | ns |
| HYAL1     | -0.00287386 | -0.01284062 | -0.54247266 | 0.58750088  | 0.667251097 | -7.05029512 | ns |
| PFDN4     | -0.00647457 | 0.061249285 | -0.54161264 | 0.588093413 | 0.667664372 | -7.04379008 | ns |
| PER3      | -0.01398144 | 0.093361329 | -0.54062719 | 0.588772581 | 0.668175646 | -7.04539797 | ns |
| INSL3     | 0.008674065 | 0.640485637 | 0.539406435 | 0.58961419  | 0.668870798 | -7.0614029  | ns |
| MYO6      | -0.00431689 | 0.021837581 | -0.53616643 | 0.591851212 | 0.671147782 | -7.06409387 | ns |
| SIGLEC15  | -0.00997358 | 0.215549695 | -0.53578377 | 0.592115908 | 0.671187287 | -7.05007007 | ns |
| FGF20     | 0.00502995  | 0.08274584  | 0.533468521 | 0.593717182 | 0.672712888 | -7.0492213  | ns |
| INSL4     | -0.00571313 | 0.050455278 | -0.53317149 | 0.593922543 | 0.672712888 | -7.06374457 | ns |
| CTRB1     | -0.00666951 | 0.01138384  | -0.53207533 | 0.594681511 | 0.673311366 | -7.06158552 | ns |
| ADGRB3    | 0.00410725  | 0.013372381 | 0.530253533 | 0.595943884 | 0.674479125 | -7.05795558 | ns |
| PVALB     | -0.01418682 | -0.19307949 | -0.52961596 | 0.596385835 | 0.674717798 | -7.06618145 | ns |
| TMED1     | -0.00622564 | 0.028285274 | -0.52515549 | 0.59948273  | 0.67795878  | -7.06084058 | ns |
| IL2       | 0.003824486 | -0.01581604 | 0.523544753 | 0.600602896 | 0.678962623 | -7.05684729 | ns |
| PLCB1     | -0.00519319 | 0.069120084 | -0.52268353 | 0.6012022   | 0.679377099 | -7.05488517 | ns |
| APOB      | 0.002580146 | -0.03276531 | 0.522157014 | 0.601568485 | 0.679528037 | -7.06938469 | ns |
| SLIRP     | 0.006532258 | 0.093171032 | 0.518711453 | 0.603969614 | 0.681976517 | -7.05586429 | ns |
| ENPEP     | -0.00494271 | 0.057241602 | -0.51834034 | 0.604228458 | 0.682005063 | -7.0578204  | ns |
| DDI2      | -0.00889691 | 0.046574761 | -0.51721916 | 0.60501073  | 0.682624162 | -7.06023504 | ns |
| GNPDA2    | 0.004110334 | 0.030758233 | 0.516405399 | 0.605578835 | 0.683001236 | -7.06065329 | ns |
| GFAP      | -0.00516667 | 0.000249587 | -0.5129315  | 0.608006785 | 0.685474831 | -7.06034778 | ns |
| FGF2      | -0.00805249 | 0.05881199  | -0.5113547  | 0.609110066 | 0.686453645 | -7.07197798 | ns |
| CACNA1C   | -0.00359234 | 0.02314259  | -0.5089495  | 0.610795068 | 0.688087036 | -7.06407484 | ns |
| CD164L2   | -0.00403316 | 0.023539022 | -0.50754505 | 0.611779838 | 0.688930632 | -7.0642877  | ns |
| MATN3     | 0.003725333 | 0.008724201 | 0.506949271 | 0.612197748 | 0.689135475 | -7.06997547 | ns |
| AKR1B10   | -0.00660785 | 0.019895561 | -0.50602924 | 0.612843505 | 0.689596545 | -7.06505168 | ns |
| IL9       | -0.00620535 | 0.088876583 | -0.50310137 | 0.614900262 | 0.691575882 | -7.07211758 | ns |
| PNLIPRP1  | 0.008271683 | -0.00369922 | 0.502631167 | 0.615230753 | 0.691575882 | -7.080461   | ns |
| SCIN      | 0.008109375 | 0.081131353 | 0.502514403 | 0.615313062 | 0.691575882 | -7.0673114  | ns |
| CREB3     | 0.0060234   | 0.072483621 | 0.502165591 | 0.615558404 | 0.691585433 | -7.06426324 | ns |
| PRKAG3    | -0.00355625 | 0.025996868 | -0.50004671 | 0.61704947  | 0.692863721 | -7.06804457 | ns |
| PPY       | 0.011853272 | 0.035545384 | 0.499874291 | 0.617170732 | 0.692863721 | -7.0790361  | ns |
| CEND1     | 0.006347908 | 0.07432179  | 0.499170122 | 0.617666823 | 0.69315416  | -7.06897716 | ns |
| ERBB3     | 0.002227732 | 0.004432797 | 0.496752239 | 0.619370931 | 0.694799507 | -7.07545688 | ns |
| MAP1LC3B2 | 0.006873826 | 0.15389875  | 0.496036234 | 0.619876099 | 0.695099159 | -7.06907047 | ns |
| PNMA2     | -0.00482989 | 0.013310812 | -0.4945312  | 0.620938283 | 0.695885001 | -7.07126935 | ns |
| CPLX2     | 0.003291426 | 0.002855245 | 0.494185463 | 0.621182431 | 0.695885001 | -7.06821677 | ns |
| GBP4      | -0.00560993 | 0.037923251 | -0.49403049 | 0.621291849 | 0.695885001 | -7.07145102 | ns |
| CRYBB2    | -0.00709556 | 0.138784028 | -0.49132327 | 0.623204778 | 0.697649021 | -7.08605071 | ns |
| FAM3B     | -0.0040106  | -0.03352769 | -0.49112566 | 0.623344622 | 0.697649021 | -7.07950528 | ns |
| CCL24     | -0.00963245 | 0.04480936  | -0.48910349 | 0.624775405 | 0.698982445 | -7.08309351 | ns |
| TGFBR3    | 0.003562514 | -0.00747867 | 0.484599516 | 0.6279673   | 0.70228438  | -7.08971915 | ns |
| DDX39A    | -0.00234368 | 0.007271949 | -0.48405084 | 0.628356836 | 0.70245098  | -7.07422434 | ns |
| APOH      | 0.004072061 | 0.002796025 | 0.483179606 | 0.628975097 | 0.702873051 | -7.08627257 | ns |
| KRT17     | 0.004092176 | -0.00040967 | 0.482600253 | 0.629386627 | 0.703054991 | -7.07560874 | ns |
| SLC28A1   | -0.00635568 | 0.097488772 | -0.48227243 | 0.629619453 | 0.703054991 | -7.07400091 | ns |
| INPP5J    | -0.00436512 | 0.024664776 | -0.47726505 | 0.633180111 | 0.706760674 | -7.09378078 | ns |
| DDX4      | 0.005665097 | 0.069556098 | 0.472589646 | 0.636512831 | 0.710209196 | -7.07967623 | ns |

|             |             |             |             |             |             |             |    |
|-------------|-------------|-------------|-------------|-------------|-------------|-------------|----|
| CCL25       | 0.005448549 | -0.04666595 | 0.472243382 | 0.636759712 | 0.710213277 | -7.09621703 | ns |
| VGf         | -0.00302642 | 0.015262499 | -0.47072475 | 0.637843924 | 0.711150919 | -7.09686431 | ns |
| SCN3A       | 0.003776377 | 0.037731567 | 0.467533632 | 0.640124876 | 0.713421618 | -7.08368762 | ns |
| NPHS2       | 0.010669066 | 0.279344091 | 0.467121632 | 0.640419627 | 0.713477799 | -7.08223124 | ns |
| CASP4       | -0.01719902 | 0.424528505 | -0.46349038 | 0.643019514 | 0.71610106  | -7.09115735 | ns |
| CDH5        | 0.003191862 | 0.02301617  | 0.461732174 | 0.644279871 | 0.717231118 | -7.10048139 | ns |
| SMPDL3B     | -0.00767458 | 0.164424298 | -0.46125227 | 0.644624114 | 0.717340859 | -7.09931202 | ns |
| MN1         | 0.005869886 | 0.082549626 | 0.458478847 | 0.646615048 | 0.719118282 | -7.087857   | ns |
| UBAC1       | 0.003790253 | 0.007699667 | 0.458341105 | 0.646713907 | 0.719118282 | -7.09498486 | ns |
| PPIE        | 0.006115281 | 0.125400629 | 0.457248177 | 0.64749918  | 0.719717398 | -7.09401546 | ns |
| RICTOR      | 0.004807361 | 0.077930817 | 0.453356804 | 0.650298378 | 0.722553753 | -7.08853143 | ns |
| FGF12       | -0.00457793 | 0.065087724 | -0.45143736 | 0.651680875 | 0.723581052 | -7.08939499 | ns |
| RGL2        | 0.00625397  | 0.101106061 | 0.451384935 | 0.65171855  | 0.723581052 | -7.09666475 | ns |
| DCUN1D2     | -0.00790687 | 0.144878423 | -0.447907   | 0.654226777 | 0.726089772 | -7.08989561 | ns |
| DEFB104A_DE | 0.00537613  | 0.097146164 | 0.445932164 | 0.655652651 | 0.727217265 | -7.0939967  | ns |
| PLXDC1      | -0.00355787 | 0.029775412 | -0.44581019 | 0.655740774 | 0.727217265 | -7.09303999 | ns |
| HRAS        | 0.00936753  | 0.270112446 | 0.445138842 | 0.656225743 | 0.727248176 | -7.09857904 | ns |
| PDE4D       | -0.00589353 | 0.136357609 | -0.44496725 | 0.656349829 | 0.727248176 | -7.09296622 | ns |
| BATF        | 0.0083318   | 0.214586247 | 0.444583907 | 0.656626845 | 0.727248176 | -7.09409653 | ns |
| SPINK8      | -0.00368545 | 0.036054929 | -0.44439299 | 0.656764877 | 0.727248176 | -7.09322017 | ns |
| EIF5        | -0.00420597 | 0.045853798 | -0.44268453 | 0.658000302 | 0.728339986 | -7.09397377 | ns |
| IFNW1       | 0.003390224 | 0.040090482 | 0.441576243 | 0.65880223  | 0.728568568 | -7.09446108 | ns |
| CORO6       | 0.003529408 | 0.031450729 | 0.441489289 | 0.658865145 | 0.728568568 | -7.09595723 | ns |
| UNG         | -0.00334462 | 0.002390642 | -0.44136447 | 0.658955338 | 0.728568568 | -7.10823948 | ns |
| ACSL1       | 0.003553908 | 0.04898679  | 0.439003438 | 0.660665355 | 0.730182754 | -7.09558762 | ns |
| VWA5A       | -0.00751351 | 0.153254762 | -0.43861514 | 0.660946735 | 0.730217354 | -7.09399158 | ns |
| PDXDC1      | 0.005270277 | 0.082029105 | 0.437123182 | 0.662028299 | 0.730910401 | -7.09464125 | ns |
| AGER        | 0.004152179 | 0.032440312 | 0.437046974 | 0.662083451 | 0.730910401 | -7.10386807 | ns |
| VSTM2L      | -0.005868   | 0.021654526 | -0.43641883 | 0.662539136 | 0.730910401 | -7.09794295 | ns |
| IL13        | -0.00515508 | 0.067688192 | -0.43636897 | 0.662575285 | 0.730910401 | -7.09845829 | ns |
| LELP1       | -0.0069691  | 0.057995305 | -0.43481615 | 0.663702108 | 0.731534124 | -7.09886504 | ns |
| REG3G       | -0.00372195 | 0.001160403 | -0.43453593 | 0.66390538  | 0.731534124 | -7.11121403 | ns |
| SPESP1      | -0.00280266 | 0.025112008 | -0.43447866 | 0.663946937 | 0.731534124 | -7.11227134 | ns |
| INSR        | -0.00155782 | 0.002053235 | -0.43420916 | 0.664142795 | 0.731534124 | -7.09698199 | ns |
| DUOX2       | -0.00739429 | 0.152954815 | -0.4337903  | 0.664446936 | 0.731593157 | -7.09908035 | ns |
| SLC39A14    | -0.00322758 | 0.00447781  | -0.43339694 | 0.66473263  | 0.731631843 | -7.09941326 | ns |
| TUBB3       | 0.002667969 | -0.01333607 | 0.432813809 | 0.665156231 | 0.731822229 | -7.09972891 | ns |
| CLNS1A      | -0.00324949 | 0.035504115 | -0.43198027 | 0.665761916 | 0.731953229 | -7.09959013 | ns |
| GID8        | -0.00315424 | 0.040262802 | -0.43195979 | 0.665776636 | 0.731953229 | -7.11426722 | ns |
| ANKRA2      | 0.005339106 | 0.03782801  | 0.430833074 | 0.66659593  | 0.73257814  | -7.09735594 | ns |
| CEACAM5     | -0.00636147 | -0.01066302 | -0.42875388 | 0.668108562 | 0.733964259 | -7.09405258 | ns |
| BHLHE40     | -0.00661201 | 0.084472553 | -0.42748794 | 0.669030074 | 0.734700194 | -7.10200727 | ns |
| COPE        | 0.004585627 | 0.040668882 | 0.426766845 | 0.669555255 | 0.735000505 | -7.10224909 | ns |
| ADAMTSL5    | 0.003608825 | 0.005379238 | 0.426173029 | 0.669987691 | 0.735198819 | -7.11582637 | ns |
| RANBP2      | 0.003063653 | 0.007332881 | 0.423910188 | 0.671637361 | 0.736732191 | -7.10352196 | ns |
| ESR1        | -0.005432   | 0.099098763 | -0.42235782 | 0.672769898 | 0.737697372 | -7.10202975 | ns |
| SMPD3       | -0.00550557 | 0.115722524 | -0.42168114 | 0.673263803 | 0.73779086  | -7.10231375 | ns |
| TEX33       | -0.00364212 | 0.043406608 | -0.42154856 | 0.673360494 | 0.73779086  | -7.10961659 | ns |
| CD3E        | -0.00319973 | 0.022095897 | -0.42118317 | 0.67362726  | 0.737806301 | -7.10976972 | ns |
| RUVBL1      | 0.010346007 | 0.285223451 | 0.419231661 | 0.675052822 | 0.739090454 | -7.10447255 | ns |
| CA7         | 0.003081416 | 0.021657627 | 0.417402868 | 0.676389627 | 0.740276503 | -7.11134617 | ns |
| GRIN2B      | -0.00516602 | 0.105742331 | -0.41468843 | 0.678375901 | 0.742172211 | -7.10736742 | ns |
| NPTN        | -0.00783174 | 0.178361566 | -0.41166108 | 0.680593722 | 0.744319726 | -7.10760043 | ns |
| CNTF        | -0.00304427 | -0.00629605 | -0.40824871 | 0.683096885 | 0.746777575 | -7.11000262 | ns |
| CINP        | -0.00406987 | 0.058903026 | -0.40588339 | 0.684833974 | 0.748396408 | -7.11606233 | ns |
| NUDT2       | 0.005270307 | 0.044004771 | 0.402127433 | 0.687595862 | 0.751133527 | -7.11903892 | ns |
| LMOD2       | -0.00564307 | 0.087807676 | -0.40021155 | 0.689006378 | 0.752392903 | -7.11323366 | ns |
| IL17F       | -0.00726167 | 0.155523911 | -0.39641066 | 0.691807703 | 0.75516953  | -7.11500528 | ns |
| ZNF75D      | 0.005301181 | 0.052044865 | 0.392457782 | 0.694725478 | 0.758071149 | -7.12139233 | ns |
| SLC1A4      | 0.004510243 | 0.083987891 | 0.391954917 | 0.695097051 | 0.758193272 | -7.11598872 | ns |
| IGLON5      | 0.007789011 | 0.259901331 | 0.388873008 | 0.697375601 | 0.760394606 | -7.11445843 | ns |
| TMED4       | 0.004765349 | 0.08490461  | 0.387556651 | 0.698349641 | 0.761172434 | -7.11673256 | ns |
| GAS6        | 0.002249177 | -0.00389406 | 0.386897686 | 0.698837302 | 0.761419747 | -7.12813077 | ns |
| CA8         | -0.00216931 | 0.02581641  | -0.38511144 | 0.700160302 | 0.762576681 | -7.11698454 | ns |
| ANPEP       | -0.00248611 | 0.002068346 | -0.38311234 | 0.701641788 | 0.763905303 | -7.12720255 | ns |
| GLI2        | 0.002793848 | 0.027447968 | 0.382638452 | 0.701993264 | 0.764003105 | -7.11792863 | ns |

|             |             |             |             |             |             |             |    |
|-------------|-------------|-------------|-------------|-------------|-------------|-------------|----|
| MMUT        | -0.00418854 | 0.052119822 | -0.37940412 | 0.704393153 | 0.766329362 | -7.11984169 | ns |
| TPT1        | -0.00584942 | 0.091322776 | -0.37858174 | 0.705003806 | 0.766430125 | -7.12187604 | ns |
| EPGN        | 0.003957501 | 0.100676841 | 0.378572262 | 0.705010725 | 0.766430125 | -7.13384447 | ns |
| MFAP3L      | 0.005527592 | 0.15983596  | 0.377695978 | 0.70566176  | 0.766852377 | -7.12144579 | ns |
| GSTT2B      | 0.019521354 | -0.51650693 | 0.374988348 | 0.707674263 | 0.768753291 | -7.13617252 | ns |
| BHMT2       | 0.002096665 | -0.01491583 | 0.373470824 | 0.708803323 | 0.769693456 | -7.12206292 | ns |
| TNPO1       | -0.00290536 | 0.009632085 | -0.37227291 | 0.70969483  | 0.770007726 | -7.12906842 | ns |
| FAM171B     | 0.002167549 | 0.026016658 | 0.372119461 | 0.709809011 | 0.770007726 | -7.13625354 | ns |
| CLPS        | -0.0059164  | 0.003085875 | -0.37158922 | 0.710203854 | 0.770007726 | -7.13274028 | ns |
| GABRA4      | 0.005221831 | 0.120533067 | 0.371449546 | 0.710307948 | 0.770007726 | -7.12427005 | ns |
| AMPD3       | 0.005924202 | 0.047963447 | 0.371020726 | 0.710627165 | 0.770007726 | -7.13764456 | ns |
| TMRSS15     | -0.0079289  | -0.00061091 | -0.37095667 | 0.710674939 | 0.770007726 | -7.1310225  | ns |
| SPACA5_SPAC | -0.00228966 | 0.002076908 | -0.36305043 | 0.716572158 | 0.775908327 | -7.14151298 | ns |
| NPHS1       | 0.00269484  | 0.008526345 | 0.362943337 | 0.716652315 | 0.775908327 | -7.12523035 | ns |
| H2AP        | -0.00409526 | 0.062393304 | -0.3608032  | 0.718251642 | 0.777351666 | -7.12492198 | ns |
| UNC5D       | -0.00209164 | 0.01333901  | -0.35991225 | 0.718917812 | 0.777784369 | -7.12631983 | ns |
| CCAR2       | -0.00425376 | 0.095377742 | -0.35650778 | 0.721465179 | 0.780110811 | -7.14289565 | ns |
| CLSTN1      | -0.00430686 | 0.03174935  | -0.35632457 | 0.7216025   | 0.780110811 | -7.12967914 | ns |
| NT5C3A      | 0.00732293  | -0.05079403 | 0.355712907 | 0.722060468 | 0.780317012 | -7.13909034 | ns |
| PDE1C       | 0.004213589 | 0.090444885 | 0.35300432  | 0.724090155 | 0.782220959 | -7.12769007 | ns |
| FKBP1B      | -0.00906677 | 0.054004095 | -0.35154957 | 0.725180884 | 0.783109535 | -7.14293911 | ns |
| EGFLAM      | 0.002306899 | 0.02256098  | 0.350248911 | 0.726156673 | 0.783873378 | -7.14403555 | ns |
| SMAD3       | 0.003939526 | 0.055930727 | 0.34907187  | 0.727040111 | 0.784260382 | -7.14451993 | ns |
| CALB1       | -0.00344784 | -0.01608964 | -0.34905563 | 0.727052347 | 0.784260382 | -7.13886434 | ns |
| DDX1        | -0.00379185 | 0.089173718 | -0.34735972 | 0.728325819 | 0.78534394  | -7.14503792 | ns |
| PGM2        | 0.004583572 | 0.097148545 | 0.345635941 | 0.729621142 | 0.786450252 | -7.13297716 | ns |
| RLN1        | -0.00542267 | 0.178978    | -0.34502749 | 0.73007838  | 0.786461856 | -7.14785979 | ns |
| SPARCL1     | 0.002238426 | 0.006737745 | 0.344904941 | 0.73017058  | 0.786461856 | -7.13962786 | ns |
| IL18RAP     | 0.014054522 | 0.437480727 | 0.344381929 | 0.730563848 | 0.786595293 | -7.13699513 | ns |
| SLC4A1      | 0.003673368 | 0.081927052 | 0.343964406 | 0.730877726 | 0.786643184 | -7.14686111 | ns |
| SEMA4C      | -0.00218216 | 0.004560033 | -0.34344759 | 0.731266479 | 0.786771598 | -7.14079562 | ns |
| PMCH        | 0.006122503 | 0.231961657 | 0.342450528 | 0.732016657 | 0.787288633 | -7.1331059  | ns |
| ACE         | 0.001934703 | -0.01228102 | 0.341335514 | 0.732855648 | 0.787900771 | -7.14703547 | ns |
| ABO         | 0.010678883 | -0.17263805 | 0.340247158 | 0.733675024 | 0.788295258 | -7.14740438 | ns |
| PRSS53      | 0.002774075 | 0.003924755 | 0.340130977 | 0.733762504 | 0.788295258 | -7.14856955 | ns |
| RGMA        | 0.002411142 | 0.024678316 | 0.335567641 | 0.737201469 | 0.791698525 | -7.15109186 | ns |
| CCND2       | -0.00268832 | -0.02658451 | -0.32949566 | 0.741785591 | 0.796069376 | -7.14399681 | ns |
| GUK1        | 0.003058066 | 0.021779593 | 0.329454589 | 0.741816703 | 0.796069376 | -7.13744791 | ns |
| ZPR1        | 0.006876203 | 0.223972318 | 0.329091898 | 0.742090798 | 0.796070952 | -7.13902533 | ns |
| NEO1        | -0.0015801  | 0.00300611  | -0.32593124 | 0.744480772 | 0.797919551 | -7.15423204 | ns |
| TET2        | -0.00718807 | 0.202701237 | -0.32573518 | 0.7446292   | 0.797919551 | -7.1443513  | ns |
| TST         | -0.00572523 | 0.043955913 | -0.32572914 | 0.744633828 | 0.797919551 | -7.13892024 | ns |
| RRP15       | 0.006471987 | 0.006131283 | 0.322284816 | 0.747241403 | 0.800419992 | -7.14123017 | ns |
| IL22RA1     | 0.003238935 | 0.035876052 | 0.319600835 | 0.749275361 | 0.802304384 | -7.14235291 | ns |
| LYSMD3      | -0.00704952 | 0.162853046 | -0.31489943 | 0.752842365 | 0.805828337 | -7.14307272 | ns |
| HMMR        | -0.00327967 | 0.057454686 | -0.31022282 | 0.756395828 | 0.809198389 | -7.14046452 | ns |
| WIF1        | 0.002484874 | 0.005403827 | 0.309889436 | 0.756649197 | 0.809198389 | -7.1600693  | ns |
| NLGN1       | 0.004570697 | 0.147300529 | 0.309662104 | 0.756822192 | 0.809198389 | -7.14469926 | ns |
| CBX2        | -0.00266608 | 0.065873713 | -0.30797744 | 0.758103766 | 0.810271961 | -7.14425538 | ns |
| MNAT1       | 0.002975091 | 0.041180447 | 0.307133344 | 0.758746067 | 0.810661733 | -7.15107644 | ns |
| DHRS4L2     | -0.00319252 | 0.068242472 | -0.30628262 | 0.759393584 | 0.81105679  | -7.15945116 | ns |
| TPSG1       | 0.001715574 | 0.01295535  | 0.305272369 | 0.760162944 | 0.811581645 | -7.14439257 | ns |
| TSHB        | 0.005517031 | 0.028700225 | 0.304484449 | 0.760762977 | 0.8119254   | -7.15366164 | ns |
| MTPN        | 0.0023391   | 0.025931889 | 0.302025819 | 0.762636549 | 0.813627594 | -7.14729156 | ns |
| CGA         | -0.00584687 | 0.196103708 | -0.29988974 | 0.764265317 | 0.815067467 | -7.15765061 | ns |
| ATF4        | 0.002265985 | 0.019725045 | 0.299500656 | 0.764562215 | 0.815086406 | -7.14504945 | ns |
| ID4         | 0.002909952 | 0.076025211 | 0.298986627 | 0.764954319 | 0.815206792 | -7.15353198 | ns |
| LILRA4      | -0.00332128 | 0.083317148 | -0.29807271 | 0.765651786 | 0.815652395 | -7.14724026 | ns |
| DDA1        | 0.002610209 | 0.034767663 | 0.294423132 | 0.768438659 | 0.818322715 | -7.1483155  | ns |
| DARS1       | -0.00504512 | -0.04285026 | -0.29208412 | 0.770226285 | 0.819927361 | -7.15510706 | ns |
| GSN         | 0.001144245 | 0.004596979 | 0.287471312 | 0.773755328 | 0.823383949 | -7.16220251 | ns |
| PDCD6       | -0.0047364  | -0.18521749 | -0.2868255  | 0.774249822 | 0.823610011 | -7.15885437 | ns |
| NEK7        | -0.00464    | 0.112703258 | -0.28463022 | 0.775931316 | 0.825098121 | -7.15769858 | ns |
| CCL2        | 0.003550992 | 0.028783068 | 0.283552419 | 0.776757257 | 0.825675715 | -7.15779352 | ns |
| RGS8        | -0.00436487 | 0.149895962 | -0.28254934 | 0.777526193 | 0.826192316 | -7.15344708 | ns |
| GGA1        | -0.00458293 | 0.162136785 | -0.28186844 | 0.778048263 | 0.826446318 | -7.15330757 | ns |

|            |             |             |             |             |             |             |    |
|------------|-------------|-------------|-------------|-------------|-------------|-------------|----|
| CDH4       | 0.002894945 | 0.042352424 | 0.28139349  | 0.778412472 | 0.826532516 | -7.15350511 | ns |
| BRD1       | 0.001884705 | 0.026491922 | 0.278332729 | 0.780760723 | 0.828724577 | -7.15946159 | ns |
| HLA-DRA    | -0.00224399 | -0.00638852 | -0.27687683 | 0.781878412 | 0.829248856 | -7.16389156 | ns |
| REG1A      | 0.003049363 | 0.030304079 | 0.27673084  | 0.781990559 | 0.829248856 | -7.15728168 | ns |
| CCDC28A    | -0.00176776 | -0.00903071 | -0.27643905 | 0.782214647 | 0.829248856 | -7.15438188 | ns |
| TAGLN3     | -0.0036668  | -0.00809489 | -0.27620995 | 0.782390616 | 0.829248856 | -7.15171682 | ns |
| RAB6B      | 0.002991718 | 0.037101954 | 0.275232516 | 0.783141381 | 0.829610544 | -7.15514587 | ns |
| GNGT1      | 0.003193017 | 0.068466667 | 0.275025909 | 0.783300092 | 0.829610544 | -7.15476939 | ns |
| PRKD2      | -0.00283427 | 0.08054571  | -0.27329287 | 0.784631849 | 0.830719724 | -7.15428052 | ns |
| ENOX2      | 0.001645438 | 0.017814115 | 0.272235484 | 0.785444698 | 0.831262922 | -7.15456736 | ns |
| TCL1B      | -0.00501619 | 0.143829201 | -0.27188487 | 0.785714269 | 0.831262922 | -7.15589324 | ns |
| PPM1A      | 0.001953607 | 0.023008063 | 0.264891232 | 0.791096883 | 0.836439454 | -7.15697638 | ns |
| UBQLN3     | 0.002755649 | 0.065592933 | 0.264783267 | 0.791180059 | 0.836439454 | -7.15655735 | ns |
| EVPL       | 0.001873472 | 0.029015047 | 0.259122517 | 0.795544206 | 0.840748853 | -7.1645959  | ns |
| REPS1      | 0.002203669 | 0.031770094 | 0.257693661 | 0.796646865 | 0.841609568 | -7.15771145 | ns |
| MYL3       | 0.003979209 | 0.031650908 | 0.254091373 | 0.799428433 | 0.844242685 | -7.16026926 | ns |
| PCNA       | -0.00362914 | 0.143699095 | -0.2525899  | 0.80058859  | 0.845162214 | -7.15792751 | ns |
| DEFB118    | -0.00317578 | 0.098682971 | -0.24855845 | 0.803705738 | 0.84814628  | -7.16215793 | ns |
| CEP152     | -0.00223885 | 0.020859488 | -0.24561013 | 0.805987404 | 0.850246828 | -7.15965658 | ns |
| TSPAN15    | 0.002666598 | 0.077819981 | 0.244827389 | 0.806593427 | 0.85057884  | -7.16161427 | ns |
| DOCK9      | 0.006159201 | 0.374213515 | 0.241821833 | 0.808921509 | 0.852725923 | -7.16380063 | ns |
| SHC1       | -0.00600584 | 0.233263641 | -0.24006694 | 0.810281641 | 0.853851459 | -7.16099526 | ns |
| SEZ6L      | 0.001533935 | 0.011829324 | 0.239571039 | 0.810666    | 0.853948311 | -7.17535327 | ns |
| GPR158     | -0.00181227 | 0.046783736 | -0.23826683 | 0.811677289 | 0.854705259 | -7.17883034 | ns |
| REG1B      | 0.003050024 | 0.042539651 | 0.236638429 | 0.812940429 | 0.855726768 | -7.17866134 | ns |
| CEACAM18   | -0.00343277 | 0.137896503 | -0.23507576 | 0.814153084 | 0.856694416 | -7.1705056  | ns |
| KHDC3L     | 0.003394616 | 0.114029158 | 0.234483362 | 0.814612944 | 0.856869523 | -7.1623128  | ns |
| DLL4       | 0.004421479 | 0.096239804 | 0.233059728 | 0.81571819  | 0.857723124 | -7.16536396 | ns |
| BRME1      | -0.00206583 | 0.022215792 | -0.22883087 | 0.819003477 | 0.860867586 | -7.166841   | ns |
| CTNNA1     | 0.001765798 | 0.053493578 | 0.228439501 | 0.819307681 | 0.860877448 | -7.16692999 | ns |
| SUMF1      | 0.003310284 | 0.130165319 | 0.225929457 | 0.821259358 | 0.862617743 | -7.16535013 | ns |
| ICAM2      | 0.001655375 | -0.03876842 | 0.223052349 | 0.823497701 | 0.864657781 | -7.18176739 | ns |
| NECTIN1    | -0.00156811 | 0.008548204 | -0.22008082 | 0.825811204 | 0.866651827 | -7.16664724 | ns |
| BSND       | 0.001666221 | 0.025292972 | 0.219850696 | 0.825990423 | 0.866651827 | -7.16561853 | ns |
| GUCY2C     | -0.00394074 | 0.227597508 | -0.21822872 | 0.827253823 | 0.867635638 | -7.17430331 | ns |
| CPTP       | 0.001905766 | 0.063736817 | 0.217572735 | 0.827764983 | 0.867635638 | -7.16788092 | ns |
| PM20D1     | -0.00962691 | -0.5239588  | -0.21750275 | 0.827819482 | 0.867635638 | -7.17389146 | ns |
| SLK        | -0.00381294 | 0.186272559 | -0.2165527  | 0.82855984  | 0.868100012 | -7.17466569 | ns |
| CAMLG      | -0.00255649 | 0.086588549 | -0.21458512 | 0.830093694 | 0.869134012 | -7.16948447 | ns |
| IL20RB     | 0.0019879   | 0.00850253  | 0.21452313  | 0.830142041 | 0.869134012 | -7.16784829 | ns |
| MICB_MICA  | 0.007592594 | -0.52832135 | 0.213461197 | 0.830970088 | 0.869689124 | -7.17935546 | ns |
| HADH       | -0.00301531 | 0.121435639 | -0.21146174 | 0.832529851 | 0.871009375 | -7.16918463 | ns |
| TXK        | -0.00348377 | 0.224679134 | -0.20925749 | 0.834250025 | 0.872496444 | -7.17621045 | ns |
| COL2A1     | -0.00365235 | 0.076571737 | -0.20847976 | 0.834857199 | 0.87281884  | -7.17076071 | ns |
| TOP1       | -0.00503237 | -0.06258099 | -0.20472625 | 0.837788701 | 0.875350023 | -7.18420028 | ns |
| IL21R      | -0.00237943 | 0.098147031 | -0.20461226 | 0.837877847 | 0.875350023 | -7.16991386 | ns |
| S100A14    | 0.002292881 | 0.084926831 | 0.201596752 | 0.840234626 | 0.877265739 | -7.18685231 | ns |
| ATP6V1D    | -0.00128378 | 0.006619696 | -0.2014973  | 0.840312422 | 0.877265739 | -7.17926396 | ns |
| ANK2       | 0.003134882 | 0.170783597 | 0.200475533 | 0.841111404 | 0.877786025 | -7.17143501 | ns |
| IL1RL1     | 0.002185996 | -0.03532132 | 0.199909128 | 0.841554283 | 0.877934443 | -7.18441098 | ns |
| UROS       | 0.002981589 | 0.06859401  | 0.198038308 | 0.843017755 | 0.87904541  | -7.17287955 | ns |
| PALLD      | -0.00173755 | 0.043042615 | -0.19748782 | 0.843448485 | 0.87904541  | -7.17133835 | ns |
| IGFL4      | 0.003228212 | 0.178911512 | 0.197393425 | 0.843522343 | 0.87904541  | -7.17135688 | ns |
| SAP18      | 0.003125138 | 0.092825761 | 0.195879285 | 0.844707258 | 0.879966177 | -7.17890576 | ns |
| RIPK4      | -0.00287723 | 0.172018718 | -0.1949187  | 0.845459232 | 0.880435434 | -7.17252755 | ns |
| CKMT1A_CKM | 0.003090829 | -0.0308338  | 0.194139514 | 0.846069226 | 0.880599153 | -7.17905892 | ns |
| RBM25      | 0.001977542 | 0.017726948 | 0.19394752  | 0.846219597 | 0.880599153 | -7.17094832 | ns |
| CRYGD      | 0.003986726 | -4.33E-05   | 0.189577685 | 0.849642557 | 0.883622899 | -7.18823141 | ns |
| HTR1A      | 0.003079433 | 0.193318319 | 0.189465536 | 0.849730514 | 0.883622899 | -7.17502908 | ns |
| DUSP13     | 0.00168621  | 0.043209695 | 0.186486993 | 0.852065326 | 0.885735405 | -7.18782398 | ns |
| SHPK       | 0.001698919 | 0.068751513 | 0.185407138 | 0.852912173 | 0.886300194 | -7.18089138 | ns |
| SERPINA12  | 0.004758678 | 0.197030936 | 0.184511537 | 0.853614692 | 0.886505456 | -7.16946555 | ns |
| RAC3       | 0.002738345 | 0.160196769 | 0.184381191 | 0.853716898 | 0.886505456 | -7.17547661 | ns |
| TFF2       | -0.00234597 | -0.01632929 | -0.18256287 | 0.855143423 | 0.887592353 | -7.18548569 | ns |
| HCCG22     | -0.00212917 | 0.06826037  | -0.18227225 | 0.855371534 | 0.887592353 | -7.17489951 | ns |
| PNLIPRP2   | -0.01237308 | -0.91199875 | -0.17608619 | 0.860228557 | 0.892315235 | -7.18427666 | ns |

|          |             |             |             |             |             |             |    |
|----------|-------------|-------------|-------------|-------------|-------------|-------------|----|
| SMC3     | -0.00209063 | 0.048593028 | -0.17450986 | 0.861467132 | 0.89328268  | -7.17450955 | ns |
| CLINT1   | 0.001843837 | 0.025287201 | 0.17202517  | 0.863420059 | 0.894989908 | -7.17493769 | ns |
| SHH      | 0.001628272 | 0.006178161 | 0.171605038 | 0.863750356 | 0.895014564 | -7.17608864 | ns |
| LPO      | -0.00240373 | -0.00400836 | -0.17079537 | 0.864386994 | 0.895286207 | -7.17081057 | ns |
| UPK3BL1  | 0.002009639 | 0.070514426 | 0.170491706 | 0.864625721 | 0.895286207 | -7.18220786 | ns |
| CYTH3    | 0.002715718 | 0.122892007 | 0.167573164 | 0.86692134  | 0.897345024 | -7.17568947 | ns |
| GNPMB    | 0.001086053 | -0.01349286 | 0.165825053 | 0.868296884 | 0.898450354 | -7.17267845 | ns |
| LRTM1    | -0.00147081 | 0.042338354 | -0.16144641 | 0.871743972 | 0.901697626 | -7.1794206  | ns |
| NEFL     | 0.001544315 | -0.03065688 | 0.160704404 | 0.872328382 | 0.901982605 | -7.17829305 | ns |
| PHLDB2   | -0.0031935  | 0.156974196 | -0.15735556 | 0.874966751 | 0.904390411 | -7.17734032 | ns |
| HEBP1    | -0.0018922  | 0.021654101 | -0.1540432  | 0.877577733 | 0.906768217 | -7.18085173 | ns |
| SCGB1A1  | 0.001917052 | -0.03176435 | 0.152126497 | 0.879089166 | 0.908008618 | -7.18973608 | ns |
| GIPR     | 0.001455775 | 0.022491418 | 0.149443498 | 0.881205695 | 0.909872924 | -7.17962654 | ns |
| KCNIP4   | -0.0017578  | 0.049283922 | -0.14770143 | 0.882580383 | 0.910970208 | -7.18196672 | ns |
| ROBO4    | 0.000565289 | -0.00486291 | 0.146991862 | 0.883140409 | 0.911226147 | -7.18162939 | ns |
| CRNN     | -0.00226495 | 0.007228069 | -0.14460643 | 0.88502357  | 0.912846636 | -7.17791633 | ns |
| NPTX2    | -0.00102591 | -0.01579928 | -0.14378358 | 0.885673241 | 0.913194161 | -7.19541926 | ns |
| ITIH1    | -0.00058085 | -0.0184061  | -0.14326874 | 0.886079804 | 0.913290868 | -7.19598191 | ns |
| CALY     | 0.001147524 | 0.022474385 | 0.141772971 | 0.887261234 | 0.914138221 | -7.18142526 | ns |
| IZUMO1   | 0.001471311 | 0.059786932 | 0.141435214 | 0.887528034 | 0.914138221 | -7.17970563 | ns |
| BST1     | -0.00155478 | -0.13496272 | -0.13903713 | 0.889422617 | 0.915766587 | -7.19748062 | ns |
| DUSP3    | -0.00279099 | 0.133040328 | -0.13843025 | 0.889902238 | 0.915908608 | -7.18328584 | ns |
| UXS1     | 0.001652221 | 0.002101821 | 0.138068807 | 0.890187886 | 0.915908608 | -7.1823883  | ns |
| ENTPD5   | -0.00067797 | -0.01061553 | -0.13758661 | 0.890568974 | 0.915977951 | -7.18323819 | ns |
| TMED10   | -0.00150741 | 0.0723704   | -0.13616177 | 0.891695222 | 0.916809605 | -7.18220075 | ns |
| OTOA     | 0.0015672   | 0.09108119  | 0.135769255 | 0.892005509 | 0.916809605 | -7.18371321 | ns |
| THAP12   | 0.002686299 | 0.18956309  | 0.133173574 | 0.894057897 | 0.918595728 | -7.17940921 | ns |
| LMOD1    | 0.00097129  | 0.004095823 | 0.13217924  | 0.894844234 | 0.919080254 | -7.19837558 | ns |
| MTR      | 0.001850722 | 0.098553785 | 0.131097885 | 0.895699629 | 0.919635343 | -7.18287372 | ns |
| YY1      | -0.00077542 | 0.011204456 | -0.12906536 | 0.897307654 | 0.920962513 | -7.18244868 | ns |
| CTLA4    | -0.00081282 | -0.0199997  | -0.1261038  | 0.899651393 | 0.923043594 | -7.19779229 | ns |
| PRR5     | -0.00129198 | 0.03743917  | -0.12564212 | 0.900016897 | 0.923094253 | -7.18288224 | ns |
| CDAN1    | 0.000613418 | 0.008007341 | 0.122985068 | 0.902120517 | 0.924926934 | -7.19858309 | ns |
| IL1R2    | -0.00055416 | -0.01122243 | -0.12197582 | 0.902919775 | 0.925421461 | -7.19100341 | ns |
| CSPG5    | -0.00128447 | 0.057561548 | -0.11987689 | 0.904582265 | 0.926800075 | -7.18573349 | ns |
| GPHA2    | 0.001183227 | 0.102839806 | 0.11665064  | 0.907138422 | 0.929093017 | -7.19827735 | ns |
| KEL      | -0.00091304 | -0.00622713 | -0.10797695 | 0.914015413 | 0.935808207 | -7.18701725 | ns |
| SAG      | 0.001234415 | 0.010505829 | 0.106896613 | 0.914872422 | 0.936259709 | -7.18719722 | ns |
| C1QL2    | -0.00097648 | 0.037425956 | -0.10661269 | 0.915097674 | 0.936259709 | -7.18507993 | ns |
| GALNT10  | 0.000678125 | -0.01727252 | 0.105636605 | 0.915872066 | 0.936723794 | -7.19390541 | ns |
| ATP5F1D  | 0.001185895 | 0.04692515  | 0.100118723 | 0.920251407 | 0.940873287 | -7.1864355  | ns |
| FGF19    | -0.0017851  | 0.02515215  | -0.09780696 | 0.922086849 | 0.94241988  | -7.19843888 | ns |
| SEMA6C   | 0.000568071 | 0.031047802 | 0.09719545  | 0.922572477 | 0.942586296 | -7.1860343  | ns |
| PGLYRP4  | -0.00130005 | 0.107113057 | -0.09569538 | 0.923763787 | 0.943473333 | -7.1868662  | ns |
| SNX18    | 0.000885412 | 0.09396236  | 0.091329618 | 0.927231867 | 0.946684284 | -7.20089642 | ns |
| CRISP3   | -0.00046973 | 0.008000267 | -0.07978023 | 0.936413091 | 0.955723952 | -7.19724992 | ns |
| ACY3     | -0.00093091 | 0.017321984 | -0.07786489 | 0.937936566 | 0.956825014 | -7.18840503 | ns |
| NRN1     | -0.00060345 | 0.02868848  | -0.07759997 | 0.938147265 | 0.956825014 | -7.2040699  | ns |
| RPGR     | -0.00070898 | 0.026118205 | -0.07700496 | 0.938620617 | 0.956973534 | -7.189433   | ns |
| LRP2     | 0.000591755 | 0.008463945 | 0.075324441 | 0.939957573 | 0.958002134 | -7.18956029 | ns |
| APOA4    | 0.000558323 | 0.017433054 | 0.073752312 | 0.941208425 | 0.958942289 | -7.20348495 | ns |
| SMPDL3A  | 0.001111766 | -0.0438468  | 0.072970355 | 0.941830656 | 0.959241547 | -7.1999091  | ns |
| SERPINB5 | -0.00080494 | -0.03698574 | -0.07244638 | 0.942247635 | 0.959331622 | -7.19004152 | ns |
| SERPINI1 | 0.000447782 | 0.028351068 | 0.068557759 | 0.94534255  | 0.962147175 | -7.18983394 | ns |
| ST8SIA1  | -0.00072901 | 0.0905163   | -0.06692943 | 0.946638775 | 0.96313074  | -7.18850435 | ns |
| LAG3     | -0.00061029 | 0.011541399 | -0.06540957 | 0.947848757 | 0.964025904 | -7.19732716 | ns |
| SOD3     | 0.000850667 | 0.093856886 | 0.064555831 | 0.948528487 | 0.964381331 | -7.20290627 | ns |
| APOBR    | -0.00055549 | -0.06262169 | -0.05978691 | 0.952326141 | 0.967905441 | -7.19059603 | ns |
| CHAD     | -0.00064929 | 0.005613369 | -0.05918568 | 0.952804994 | 0.968055178 | -7.19151795 | ns |
| BCL7A    | 0.000769895 | 0.052545431 | 0.055893236 | 0.955427603 | 0.970142026 | -7.18809905 | ns |
| ATP1B3   | 0.000483758 | 0.053492184 | 0.05546002  | 0.955772718 | 0.970142026 | -7.18989039 | ns |
| CRHR1    | -0.0007902  | 0.068512175 | -0.05474342 | 0.956343601 | 0.970142026 | -7.19116117 | ns |
| FUT1     | -0.00075895 | 0.076210297 | -0.05460958 | 0.956450225 | 0.970142026 | -7.1959016  | ns |
| AFAP1    | 0.001008881 | 0.1946143   | 0.054521788 | 0.956520169 | 0.970142026 | -7.19178166 | ns |
| FOS      | 0.000416007 | -0.02025912 | 0.053116535 | 0.957639765 | 0.970732296 | -7.18682491 | ns |
| VSIG10L  | -0.00037496 | 0.011452428 | -0.05285908 | 0.957844888 | 0.970732296 | -7.19003049 | ns |



|           |              |             |             |             |             |             |    |
|-----------|--------------|-------------|-------------|-------------|-------------|-------------|----|
| KLHL41    | 0.000568722  | 0.073846963 | 0.0521012   | 0.958448727 | 0.970732296 | -7.20571471 | ns |
| ITPR1P    | -0.00052636  | 0.085454469 | -0.05202791 | 0.958507147 | 0.970732296 | -7.19153334 | ns |
| EVI2B     | 0.000463168  | 0.035949431 | 0.051705096 | 0.958764364 | 0.970732296 | -7.18832312 | ns |
| GH2       | 0.001837031  | 0.507137291 | 0.047572566 | 0.962057528 | 0.973728936 | -7.19074213 | ns |
| CLEC10A   | 0.000387782  | -0.01148855 | 0.046538836 | 0.96288139  | 0.974188175 | -7.19763475 | ns |
| GPR101    | 0.000613503  | 0.112691005 | 0.046166048 | 0.963178514 | 0.974188175 | -7.19181957 | ns |
| RYR1      | -0.00032288  | 0.028298676 | -0.04236823 | 0.96620572  | 0.976911601 | -7.19052725 | ns |
| FGF6      | -0.0003516   | 0.044644467 | -0.04049949 | 0.967695448 | 0.978079165 | -7.18991621 | ns |
| SCN2B     | 0.000252681  | 0.011103532 | 0.040076182 | 0.96803292  | 0.978081705 | -7.19158298 | ns |
| KIAA1549L | 0.000242936  | 0.009595429 | 0.039469341 | 0.968516713 | 0.978232031 | -7.19721141 | ns |
| PSMC3     | 0.000252058  | 0.012868642 | 0.037450211 | 0.970126536 | 0.979351085 | -7.18895507 | ns |
| SELPLG    | -0.00023278  | -0.01906227 | -0.03723835 | 0.970295442 | 0.979351085 | -7.20132616 | ns |
| L1CAM     | 0.000242744  | -0.02232053 | 0.0364914   | 0.970891008 | 0.979613595 | -7.2032344  | ns |
| ACTN2     | 0.000445782  | 0.079728462 | 0.034484637 | 0.972491151 | 0.980889175 | -7.19082853 | ns |
| RELB      | -0.00034713  | 0.077298736 | -0.03245644 | 0.974108483 | 0.982181205 | -7.19020799 | ns |
| AMIGO1    | 0.000342623  | 0.071392548 | 0.030503127 | 0.975666202 | 0.983412258 | -7.19191896 | ns |
| CYP24A1   | 0.000551402  | 0.218778828 | 0.029634618 | 0.97635885  | 0.983770821 | -7.19098316 | ns |
| IL11      | 0.000412206  | 0.099355037 | 0.027469926 | 0.978085289 | 0.985170419 | -7.19277036 | ns |
| AXL       | -0.00016842  | 0.001915937 | -0.0268784  | 0.978557068 | 0.985305737 | -7.20072222 | ns |
| BCAT2     | 0.00031478   | 0.087976137 | 0.026044885 | 0.979221882 | 0.985635262 | -7.19254207 | ns |
| IL24      | -0.00026496  | 0.030004918 | -0.02344483 | 0.981295757 | 0.987050867 | -7.19287227 | ns |
| TLR4      | 0.000145472  | 0.003920223 | 0.023434072 | 0.981304338 | 0.987050867 | -7.19045874 | ns |
| OSTN      | -0.00020861  | 0.042508414 | -0.02246209 | 0.98207965  | 0.987490557 | -7.19213074 | ns |
| MOG       | 0.000160085  | 0.006724024 | 0.021050209 | 0.983205874 | 0.988282668 | -7.20760935 | ns |
| FH        | -0.00037259  | 0.175841777 | -0.02010873 | 0.983956903 | 0.988697232 | -7.19267831 | ns |
| ERC2      | -0.00029269  | 0.145471502 | -0.01819013 | 0.985487415 | 0.98989448  | -7.1922171  | ns |
| PRDX1     | -0.00033739  | 0.10592598  | -0.01686053 | 0.986548104 | 0.990619142 | -7.18909153 | ns |
| IL2RG     | 0.000127303  | 0.025331718 | 0.016416501 | 0.986902327 | 0.990634169 | -7.20498572 | ns |
| RNF4      | -0.00021646  | 0.127070525 | -0.01488275 | 0.988125914 | 0.991521536 | -7.19787596 | ns |
| TP73      | -0.00010175  | -0.00385965 | -0.0136214  | 0.989132214 | 0.992190335 | -7.19228937 | ns |
| TGM2      | -0.0002364   | 0.029870414 | -0.01307211 | 0.989570431 | 0.992289031 | -7.19855651 | ns |
| LPA       | 0.000445255  | -0.13674861 | 0.011361007 | 0.990935573 | 0.993316812 | -7.19216549 | ns |
| AGBL2     | -0.00019122  | -0.08226005 | -0.00951092 | 0.992411626 | 0.994455027 | -7.1928344  | ns |
| PDCL2     | -8.79E-05    | 0.067610293 | -0.00756878 | 0.993961148 | 0.995666056 | -7.18962398 | ns |
| EDDM3B    | -5.65E-05    | 0.185020185 | -0.00505447 | 0.995967202 | 0.997333412 | -7.20510705 | ns |
| NAAA      | -6.35E-05    | 0.052243935 | -0.00455466 | 0.996365978 | 0.99737861  | -7.19626549 | ns |
| TRIM26    | -5.04E-05    | 0.028640413 | -0.00414169 | 0.996695474 | 0.99737861  | -7.18964394 | ns |
| SERPINC1  | -6.12E-06    | 0.002459017 | -0.00191139 | 0.998474957 | 0.998817018 | -7.2044765  | ns |
| EPB41L5   | 3.5881592904 | 0.057211143 | 0.00025718  | 0.999794803 | 0.999794803 | -7.1923816  | ns |

**Omnivore vs Sweet-tooth**

|          | logFC       | AveExpr     | t           | P.Value      | adj.P.Val    | B           | protein_type |
|----------|-------------|-------------|-------------|--------------|--------------|-------------|--------------|
| APOF     | 0.038478123 | -0.01808688 | 7.475284087 | 8.1157117185 | 2.3697878218 | 20.64685201 | ns           |
| CNDP1    | 0.069723936 | -0.0301518  | 6.995107291 | 2.7600664001 | 3.2631280145 | 17.21288595 | ns           |
| HAVCR2   | -0.05161377 | -0.03890064 | -6.96769976 | 3.3525287820 | 3.2631280145 | 17.02289036 | ns           |
| EPHA1    | -0.05123683 | -0.0608638  | -6.92577448 | 4.5076595132 | 3.2905914447 | 16.73473914 | ns           |
| TNFRSF19 | -0.04242113 | -0.0182122  | -6.85289054 | 7.5096691830 | 4.3856468028 | 16.23496899 | ns           |
| DLL1     | -0.04032231 | -0.01921755 | -6.66535556 | 2.7297315966 | 1.1462214944 | 14.98314436 | ns           |
| NECTIN2  | -0.0396202  | -0.01902468 | -6.6432084  | 3.1729596731 | 1.1462214944 | 14.84010647 | ns           |
| TNFRSF1B | -0.04960829 | -0.01985275 | -6.6250988  | 3.5854724387 | 1.1462214944 | 14.71922415 | ns           |
| DSC2     | -0.04653203 | -0.01553323 | -6.59991746 | 4.2502086814 | 1.1462214944 | 14.55847713 | ns           |
| TAF5     | -0.04840147 | -0.0233528  | -6.59457387 | 4.4045858706 | 1.1462214944 | 14.52152332 | ns           |
| RELT     | -0.03773343 | -0.03067685 | -6.58626698 | 4.6566382401 | 1.1462214944 | 14.46540117 | ns           |
| GGH      | -0.05204962 | -0.04112374 | -6.58466196 | 4.7104992921 | 1.1462214944 | 14.46138825 | ns           |
| TNFRSF1A | -0.03926787 | -0.02483846 | -6.54666256 | 6.0701896621 | 1.3634579856 | 14.20805632 | ns           |
| BTN2A1   | -0.03373757 | -0.01175012 | -6.37439166 | 1.8891260411 | 3.9401771715 | 13.10613831 | ns           |
| NPC2     | -0.03935316 | -0.03478036 | -6.3630962  | 2.0338385463 | 3.9592057034 | 13.03883907 | ns           |
| INHBB    | -0.06499336 | -0.02699148 | -6.32117024 | 2.6685747271 | 4.8701488770 | 12.77828088 | ns           |
| CTSO     | -0.04195035 | -0.0237383  | -6.2614499  | 3.9143999250 | 6.7235575183 | 12.39736422 | ns           |
| PTGDS    | -0.03780882 | -0.01244456 | -6.24131621 | 4.4545931102 | 7.2263399344 | 12.2806996  | ns           |
| EPHA2    | -0.03815081 | -0.02213227 | -6.19178638 | 6.1045587740 | 9.3817429580 | 11.98180107 | ns           |
| FGFR2    | -0.02783331 | -0.02253775 | -6.16722931 | 7.1228331662 | 1.0399336422 | 11.81990752 | ns           |
| TNFRSF4  | -0.04767074 | -0.01322573 | -6.14243961 | 8.3246846670 | 1.1563719121 | 11.66711926 | ns           |
| CKAP4    | -0.03350685 | -0.00595406 | -6.13520541 | 8.7123911190 | 1.1563719121 | 11.62456768 | ns           |
| FAM3C    | -0.03730862 | -0.02927723 | -6.07715003 | 1.2524215602 | 1.5900308504 | 11.27710858 | ns           |
| SERPINA7 | -0.02300735 | -0.01020756 | -6.04179002 | 1.5590208196 | 1.8968086639 | 11.06044798 | ns           |

|            |             |             |             |              |              |             |    |
|------------|-------------|-------------|-------------|--------------|--------------|-------------|----|
| EFNA4      | -0.03610642 | -0.02651292 | -6.02004126 | 1.7837320173 | 2.0833989963 | 10.9359934  | ns |
| GFRA1      | -0.03462859 | -0.0221911  | -5.95059096 | 2.7293371936 | 3.0652556175 | 10.51820473 | ns |
| CSF1       | -0.03379919 | -0.0134698  | -5.93592899 | 2.9845640057 | 3.1606808949 | 10.43455921 | ns |
| COL6A3     | -0.04247882 | -0.03672984 | -5.93073479 | 3.0799124841 | 3.1606808949 | 10.40168039 | ns |
| WFDC2      | -0.04471095 | -0.01115656 | -5.92778601 | 3.1390323957 | 3.1606808949 | 10.40259286 | ns |
| TNFRSF14   | -0.036769   | -0.0197507  | -5.8617027  | 4.6753805620 | 4.5507037470 | 10.00255476 | ns |
| CST3       | -0.03443216 | -0.04064463 | -5.82461642 | 5.8391328790 | 5.5000864538 | 9.78875194  | ns |
| COLEC12    | -0.03221571 | -0.03369293 | -5.78980365 | 7.1848115785 | 6.5561405653 | 9.588824745 | ns |
| RNAS22     | -0.0318881  | -0.01705792 | -5.71768513 | 1.0998219623 | 9.7317579701 | 9.175055945 | ns |
| CD83       | -0.04038972 | -0.0265991  | -5.64713358 | 1.6603711066 | 1.4259657739 | 8.779227238 | ns |
| EGFR       | 0.019556498 | 0.012870119 | 5.606859735 | 2.0954334509 | 1.7255265061 | 8.551481286 | ns |
| TGFBR2     | -0.03630374 | -0.01406392 | -5.60424968 | 2.1273614459 | 1.7255265061 | 8.539060606 | ns |
| PI3        | -0.06505047 | -0.03348576 | -5.5913886  | 2.2916464614 | 1.8085426128 | 8.476126523 | ns |
| SHISA5     | -0.02662199 | -0.02141815 | -5.56047232 | 2.7349418615 | 2.1015869041 | 8.295713652 | ns |
| PSAP       | -0.03113623 | -0.01470993 | -5.53529472 | 3.1580499569 | 2.3644886857 | 8.160791706 | ns |
| LTBR       | -0.03167205 | -0.00391684 | -5.52500899 | 3.3486829386 | 2.4445385452 | 8.107474025 | ns |
| CD27       | -0.04593542 | -0.03557877 | -5.51994743 | 3.4456677087 | 2.4539877340 | 8.074676797 | ns |
| HLA-E      | -0.033098   | -0.00444427 | -5.51334501 | 3.5775953115 | 2.4872805499 | 8.039880494 | ns |
| CTS2       | -0.0380229  | -0.02756025 | -5.4910825  | 4.0584493485 | 2.7346901340 | 7.920485808 | ns |
| KRT18      | -0.09810502 | -0.00335384 | -5.48838489 | 4.1207659554 | 2.7346901340 | 7.905971578 | ns |
| IGFBP4     | -0.04629484 | -0.04467782 | -5.44218233 | 5.3446091238 | 3.4680574759 | 7.657687841 | ns |
| LAIR1      | -0.04337119 | -0.03529584 | -5.42453516 | 5.8986893793 | 3.7443854321 | 7.560648437 | ns |
| AGRN       | -0.03802839 | -0.02782697 | -5.35289788 | 8.7795853652 | 5.4545509077 | 7.175620079 | ns |
| TNFRSF8    | -0.05155627 | 0.016251564 | -5.33712778 | 9.5758932449 | 5.8253350573 | 7.089170087 | ns |
| OCLN       | -0.0458463  | -0.03554469 | -5.32635303 | 1.0160144585 | 6.0546167734 | 7.032280054 | ns |
| RNF149     | -0.03164317 | -0.02630013 | -5.31564796 | 1.0779238051 | 6.2950750223 | 6.987166815 | ns |
| ALCAM      | -0.02161813 | -0.00660483 | -5.28981468 | 1.2410368680 | 6.9907146265 | 6.840513271 | ns |
| LTBP3      | -0.06357854 | 0.009939478 | -5.28931892 | 1.2449217828 | 6.9907146265 | 6.848897146 | ns |
| ATRAID     | -0.02815427 | -0.00162156 | -5.2801193  | 1.3084655306 | 7.2089044329 | 6.791000355 | ns |
| B2M        | -0.03182519 | -0.0022426  | -5.27412724 | 1.3518256226 | 7.3098718854 | 6.759026032 | ns |
| EFCAB14    | -0.0275523  | -0.00638845 | -5.20042851 | 2.0136526176 | 1.0690664806 | 6.377315985 | ns |
| NBL1       | -0.0274597  | -0.01560759 | -5.14633887 | 2.6887769475 | 1.3825615127 | 6.101032153 | ns |
| NECTIN4    | -0.03150401 | -0.00957149 | -5.1456368  | 2.6988358296 | 1.3825615127 | 6.097453055 | ns |
| LY6D       | -0.0397199  | -0.01867656 | -5.13662538 | 2.8316476651 | 1.4159688926 | 6.055994886 | ns |
| CD302      | -0.03176318 | -0.0288168  | -5.13467263 | 2.8610330365 | 1.4159688926 | 6.045138178 | ns |
| TNFRSF10B  | -0.04312728 | -0.03318523 | -5.12445317 | 3.0204217612 | 1.4428748289 | 5.993469234 | ns |
| TNF        | -0.04233697 | -0.00662835 | -5.12425628 | 3.0240695834 | 1.4428748289 | 5.996990778 | ns |
| INHBC      | -0.05088095 | -0.10462579 | -5.12175621 | 3.0636383354 | 1.4428748289 | 5.977066979 | ns |
| IL10RB     | -0.03127992 | -0.02621208 | -5.11604988 | 3.1574619855 | 1.4634585710 | 5.947511331 | ns |
| FCAMR      | -0.07738115 | -0.02923245 | -5.09916419 | 3.4518079725 | 1.5748873874 | 5.859768419 | ns |
| PIK3IP1    | -0.02738431 | -0.01434001 | -5.09546287 | 3.5201418824 | 1.5813560456 | 5.843999437 | ns |
| SIRPB1     | -0.0495077  | -0.03952379 | -5.0567653  | 4.3135708494 | 1.8838243401 | 5.65208173  | ns |
| LGALS4     | -0.05833077 | -0.03602431 | -5.05636797 | 4.3224736571 | 1.8838243401 | 5.649576674 | ns |
| SPON2      | -0.03644497 | -0.02850134 | -5.03945906 | 4.7220176318 | 2.0276899242 | 5.567029309 | ns |
| CFD        | -0.01966453 | -0.01534626 | -5.01359052 | 5.4013534243 | 2.2559463489 | 5.43132594  | ns |
| CD79B      | -0.04731832 | -0.02614915 | -5.01334523 | 5.4080905626 | 2.2559463489 | 5.429149874 | ns |
| SUSD4      | -0.04180014 | 0.018281077 | -4.9915112  | 6.0560880153 | 2.4906728175 | 5.322418969 | ns |
| CD300E     | -0.04314428 | -0.02326622 | -4.93532766 | 8.0849208324 | 3.2788845598 | 5.04531779  | ns |
| FABP1      | -0.10334502 | -0.09211696 | -4.92946335 | 8.3318048975 | 3.3327219590 | 5.021853815 | ns |
| OGN        | -0.04244728 | -0.04045438 | -4.90353508 | 9.5088702956 | 3.7521488193 | 4.893352655 | ns |
| CCER2      | -0.05977518 | 0.035620043 | -4.88633187 | 1.0378735786 | 4.0407877996 | 4.818102312 | ns |
| SPINK4     | -0.06607543 | 0.028102072 | -4.85252076 | 1.2309995149 | 4.7296297154 | 4.64709304  | ns |
| VWC2       | -0.04070238 | -0.04137541 | -4.8342832  | 1.3493229653 | 5.1169130633 | 4.563960086 | ns |
| EFNA1      | -0.02725113 | -0.01533742 | -4.81315376 | 1.4998283537 | 5.6147420423 | 4.45923682  | ns |
| FSTL1      | -0.0215922  | -0.01952285 | -4.81056813 | 1.5195741376 | 5.6166537745 | 4.454204671 | ns |
| PLA2G15    | -0.02698216 | -0.01449308 | -4.8036888  | 1.5723215323 | 5.7159956772 | 4.412074912 | ns |
| CDHR5      | -0.04283945 | -0.06542682 | -4.80201845 | 1.5856015405 | 5.7159956772 | 4.407414676 | ns |
| CD59       | -0.02232296 | -0.02144653 | -4.78832399 | 1.6981651052 | 6.0471245211 | 4.357044727 | ns |
| NPPC       | -0.04650567 | -0.00057409 | -4.76712374 | 1.8858928202 | 6.6347072711 | 4.240110252 | ns |
| TMPPRSS11D | -0.03526223 | 0.003513503 | -4.74582671 | 2.0951236322 | 7.2830488170 | 4.136821308 | ns |
| PRG2       | -0.04865187 | 0.009338928 | -4.71828223 | 2.3992294355 | 8.2420587667 | 4.007689841 | ns |
| LAMP3      | -0.05439971 | -0.04649444 | -4.70484711 | 2.5624869722 | 8.7005371616 | 3.944297933 | ns |
| GDF15      | -0.03914234 | -0.05624946 | -4.68296621 | 2.8514930737 | 9.5044030713 | 3.842335689 | ns |
| HSPG2      | -0.02505867 | -0.01699601 | -4.68208525 | 2.8643406516 | 9.5044030713 | 3.847774686 | ns |
| ASGR1      | -0.03139906 | -0.04427822 | -4.67795128 | 2.9223948862 | 9.5880820986 | 3.825369094 | ns |
| TNFRSF12A  | -0.03432786 | -0.03569182 | -4.66809899 | 3.0655669968 | 9.9460618121 | 3.775764546 | ns |

|          |             |              |             |              |             |             |    |
|----------|-------------|--------------|-------------|--------------|-------------|-------------|----|
| ICAM1    | -0.02922898 | -0.02943166  | -4.6625261  | 3.1500801908 | 0.000101079 | 3.756056088 | ns |
| TTR      | 0.023188898 | -0.00211707  | 4.65814873  | 3.2174934505 | 0.00010212  | 3.733119202 | ns |
| IL2RA    | -0.04029842 | -0.01663132  | -4.64726252 | 3.3919355855 | 0.000106499 | 3.68580793  | ns |
| TNFRSF21 | -0.02607033 | -0.00547418  | -4.62380525 | 3.7980476626 | 0.000117982 | 3.569106736 | ns |
| CFH      | -0.0252314  | -0.04566867  | -4.61248323 | 4.0127739498 | 0.00012334  | 3.544146235 | ns |
| ULBP2    | -0.03538657 | -0.02186822  | -4.59382047 | 4.3868322311 | 0.000131356 | 3.438899778 | ns |
| PDCD1    | -0.04132275 | 0.010834746  | -4.59309856 | 4.4015096570 | 0.000131356 | 3.429097389 | ns |
| ANG      | -0.03460943 | -0.02723474  | -4.59220004 | 4.4210910501 | 0.000131356 | 3.432828243 | ns |
| RNASE6   | -0.02601364 | -0.02731617  | -4.59065973 | 4.4535145170 | 0.000131356 | 3.422679633 | ns |
| CRHBP    | -0.02839422 | -0.04154438  | -4.5853443  | 4.5682414158 | 0.000133393 | 3.399745846 | ns |
| ADM      | -0.029065   | -0.05568744  | -4.57027734 | 4.9083545681 | 0.000141905 | 3.324700048 | ns |
| SPINK1   | -0.03804144 | -0.00950071  | -4.56117102 | 5.1262262789 | 0.000146751 | 3.287914834 | ns |
| NPDC1    | -0.02811317 | -0.01434314  | -4.54735457 | 5.4741065668 | 0.000155188 | 3.227791712 | ns |
| IL18BP   | -0.02903115 | -0.01793789  | -4.54366028 | 5.5707199964 | 0.000156409 | 3.209937921 | ns |
| A1BG     | -0.01612336 | -0.02054699  | -4.53297235 | 5.8594775513 | 0.000162502 | 3.157999919 | ns |
| SUOX     | -0.05805137 | 0.065689172  | -4.53141662 | 5.9026629249 | 0.000162502 | 3.149974212 | ns |
| SMOC1    | -0.0324224  | -0.05614878  | -4.52955993 | 5.9547086275 | 0.000162502 | 3.141087513 | ns |
| FCER2    | -0.04978537 | -0.0254095   | -4.52272922 | 6.1504024392 | 0.000166289 | 3.114883269 | ns |
| FSTL3    | -0.03023199 | -0.0245828   | -4.50285991 | 6.7540254070 | 0.000180934 | 3.028584133 | ns |
| JAM2     | -0.02361254 | -0.01175586  | -4.49604301 | 6.9731508250 | 0.000185105 | 2.991714207 | ns |
| CD72     | -0.03834442 | -0.01876961  | -4.46652378 | 8.0076129511 | 0.000210651 | 2.8722783   | ns |
| EPHB4    | -0.02220574 | -0.01053221  | -4.45730619 | 8.3577775823 | 0.000217899 | 2.820246309 | ns |
| C1QA     | -0.02230995 | 9.8688376300 | -4.45004137 | 8.6453184241 | 0.000223401 | 2.789142119 | ns |
| CD5      | -0.03273872 | -0.01939922  | -4.43509323 | 9.2665764087 | 0.000237354 | 2.721914782 | ns |
| SULT2A1  | -0.05262241 | 0.05863813   | -4.42129012 | 9.8787279893 | 0.000250834 | 2.665623423 | ns |
| EFEMP1   | -0.02934196 | -0.03396737  | -4.41154311 | 1.0333659565 | 0.000259146 | 2.624458139 | ns |
| BSG      | -0.01783169 | -0.0147872   | -4.41048066 | 1.0383584797 | 0.000259146 | 2.614648677 | ns |
| SORCS2   | -0.0319257  | -0.0212106   | -4.40444639 | 1.0678673180 | 0.000264252 | 2.600244297 | ns |
| PRAP1    | -0.03998382 | -0.09612293  | -4.4025421  | 1.0770636173 | 0.000264288 | 2.580659485 | ns |
| CLEC14A  | -0.02883359 | -0.01898047  | -4.40067456 | 1.0864180564 | 0.000264362 | 2.575180579 | ns |
| TNFSF10  | -0.02511613 | -0.01090176  | -4.39786677 | 1.1004691894 | 0.000265568 | 2.559033082 | ns |
| RGMB     | -0.02390677 | 0.002459327  | -4.37181832 | 1.2401818096 | 0.00029683  | 2.445780634 | ns |
| MMP12    | -0.04887664 | -0.05599083  | -4.34772067 | 1.3844350625 | 0.000328663 | 2.344843039 | ns |
| TIMD4    | -0.04175989 | -0.02280482  | -4.33189353 | 1.4877103787 | 0.000350332 | 2.278572994 | ns |
| EPHB6    | -0.0279716  | 0.000193873  | -4.32135494 | 1.5605701898 | 0.000360706 | 2.236396056 | ns |
| CD46     | -0.02647938 | -0.00838459  | -4.32063766 | 1.5656886841 | 0.000360706 | 2.235279438 | ns |
| RARRES2  | -0.04808087 | -0.0752127   | -4.31973173 | 1.5719800645 | 0.000360706 | 2.22518365  | ns |
| NTRK3    | 0.021039151 | 0.014814134  | 4.318432077 | 1.5811760292 | 0.000360706 | 2.215850093 | ns |
| AMPB     | -0.01847657 | -0.03425718  | -4.30534186 | 1.6775215875 | 0.000379718 | 2.159866244 | ns |
| TGOLN2   | -0.02187995 | -0.01089464  | -4.29347105 | 1.7697182140 | 0.000395344 | 2.111131748 | ns |
| PIGR     | -0.0336137  | -0.01968801  | -4.2930108  | 1.7736312448 | 0.000395344 | 2.117457681 | ns |
| IL18R1   | -0.03209823 | -0.03755503  | -4.28987272 | 1.7985641271 | 0.000397864 | 2.094044309 | ns |
| SERPINF1 | -0.0244105  | -0.03790164  | -4.26808641 | 1.9834767179 | 0.00043547  | 2.008958538 | ns |
| TNFRSF17 | -0.03462875 | -0.03280297  | -4.26473255 | 2.0135528673 | 0.000438774 | 1.999303452 | ns |
| BGLAP    | -0.07443445 | -0.05549405  | -4.2571463  | 2.0827248078 | 0.000450486 | 1.956663347 | ns |
| SCGN     | -0.0407139  | 0.019422048  | -4.24071202 | 2.2413741040 | 0.000481236 | 1.898137949 | ns |
| GUSB     | -0.05698715 | -0.04504515  | -4.23276855 | 2.3216855182 | 0.000494841 | 1.85597818  | ns |
| PRSS8    | -0.03788736 | -0.05488094  | -4.21279918 | 2.5367333526 | 0.000536758 | 1.776297372 | ns |
| SCRG1    | -0.0220243  | -0.02391007  | -4.20664593 | 2.6064704127 | 0.000547546 | 1.744334172 | ns |
| NOTCH2   | -0.01798643 | 0.0187563    | -4.20466539 | 2.6293764202 | 0.000548413 | 1.736565164 | ns |
| COL15A1  | -0.0222527  | -0.01423475  | -4.19720034 | 2.7174282885 | 0.000562758 | 1.705478965 | ns |
| TFPI2    | -0.03304866 | -0.00301056  | -4.18291038 | 2.8939395372 | 0.000595092 | 1.648458483 | ns |
| SUMF2    | -0.04856573 | -0.07254732  | -4.17268587 | 3.0267001909 | 0.000618039 | 1.602482057 | ns |
| CRELD2   | -0.04762123 | -0.02925098  | -4.16873717 | 3.0796831740 | 0.000624491 | 1.590501783 | ns |
| BPIFB2   | -0.05719183 | 0.05996641   | -4.16642294 | 3.1109833183 | 0.000625385 | 1.578387485 | ns |
| GM2A     | -0.03146205 | -0.00674073  | -4.16528467 | 3.1269265010 | 0.000625385 | 1.583859742 | ns |
| LMNB2    | -0.02303825 | -0.02366368  | -4.15207036 | 3.3124337204 | 0.00065798  | 1.518282749 | ns |
| PON3     | 0.025690986 | 0.001823046  | 4.137420416 | 3.5309614820 | 0.000696649 | 1.460568864 | ns |
| POF1B    | -0.03689791 | 0.042908855  | -4.12402402 | 3.7431101806 | 0.000733549 | 1.416418083 | ns |
| PTPRN2   | -0.02835457 | -0.00382663  | -4.11096078 | 3.9608601775 | 0.000771047 | 1.358593914 | ns |
| ASGR2    | -0.02122855 | -0.00895729  | -4.10636857 | 4.0399210663 | 0.000776231 | 1.332189635 | ns |
| GIGYF2   | -0.06562756 | 0.043087227  | -4.10632324 | 4.0406540192 | 0.000776231 | 1.330168082 | ns |
| TNFRSF9  | -0.03483861 | -0.01015511  | -4.1047087  | 4.0692893938 | 0.000776623 | 1.33064448  | ns |
| NHLRC3   | -0.02688995 | -0.04392814  | -4.08289449 | 4.4712416175 | 0.000847794 | 1.257557218 | ns |
| IFI30    | -0.03247403 | -0.04655162  | -4.07550023 | 4.6150401778 | 0.000869414 | 1.215967406 | ns |
| THY1     | -0.02426571 | -0.01898924  | -4.07081785 | 4.7080720703 | 0.000881255 | 1.186247616 | ns |

|           |             |             |             |              |             |             |    |
|-----------|-------------|-------------|-------------|--------------|-------------|-------------|----|
| PLAUR     | -0.02363523 | -0.03703801 | -4.0655322  | 4.8164382038 | 0.000895796 | 1.174689951 | ns |
| XG        | -0.02713365 | -0.006128   | -4.04391218 | 5.2822377810 | 0.000970404 | 1.081544095 | ns |
| PODXL2    | -0.02392797 | 0.013059613 | -4.04383014 | 5.2840489794 | 0.000970404 | 1.080563573 | ns |
| CD74      | -0.030047   | -0.03293008 | -4.03846217 | 5.4061642553 | 0.000980229 | 1.056189749 | ns |
| PRRT3     | -0.03048921 | 0.015882938 | -4.0381443  | 5.4142245327 | 0.000980229 | 1.067865763 | ns |
| NUCB2     | -0.03329116 | -0.00627497 | -4.03478807 | 5.4913960938 | 0.000980229 | 1.04160894  | ns |
| ACP5      | -0.02899446 | -0.05512518 | -4.03440357 | 5.5005205720 | 0.000980229 | 1.043186193 | ns |
| PBLD      | -0.04546435 | 0.022806931 | -4.03422091 | 5.5053968761 | 0.000980229 | 1.051413525 | ns |
| CAPG      | -0.05270552 | -0.06983188 | -4.03215853 | 5.5535447681 | 0.000982809 | 1.037759319 | ns |
| TFF1      | -0.06426111 | 0.023579233 | -4.02398754 | 5.7496638112 | 0.001011387 | 1.005104083 | ns |
| CD38      | -0.02656845 | -0.02282377 | -4.00585137 | 6.2086763688 | 0.001072318 | 0.932969714 | ns |
| IGFBP6    | -0.02389185 | -0.01031694 | -4.00543441 | 6.2198147735 | 0.001072318 | 0.933771796 | ns |
| YAP1      | -0.02159165 | -0.01888789 | -4.00465269 | 6.2398252799 | 0.001072318 | 0.922268512 | ns |
| SPOCK1    | 0.022366789 | 0.00351267  | 4.004301436 | 6.2495307692 | 0.001072318 | 0.927115449 | ns |
| RNASE4    | -0.0217811  | -0.03006874 | -4.0023482  | 6.3019588322 | 0.001072318 | 0.928065569 | ns |
| IGLC2     | -0.01916784 | 0.004191152 | -4.00158197 | 6.3213574294 | 0.001072318 | 0.911042849 | ns |
| FAM20A    | -0.02355982 | -0.04298675 | -4.00039338 | 6.3531164950 | 0.001072318 | 0.905316199 | ns |
| IL1RN     | -0.05138433 | -0.00163616 | -3.99893986 | 6.3925674507 | 0.001072776 | 0.904982786 | ns |
| ADAM9     | -0.02342769 | -0.00934361 | -3.99539268 | 6.4886337497 | 0.001082675 | 0.886513539 | ns |
| PRCP      | -0.0278459  | -0.04334977 | -3.99048444 | 6.6243016408 | 0.001099032 | 0.868200603 | ns |
| GHRL      | 0.070816177 | 0.053246639 | 3.974084137 | 7.0974591057 | 0.00117088  | 0.806932157 | ns |
| RNASE1    | -0.01910243 | -0.01455021 | -3.96930055 | 7.2409344724 | 0.001187839 | 0.783524806 | ns |
| KRT8      | -0.04929242 | 0.035507696 | -3.96308985 | 7.4326807185 | 0.001212482 | 0.769413206 | ns |
| IFNLR1    | -0.03306251 | -0.01527757 | -3.95723554 | 7.6163522234 | 0.001235542 | 0.738681751 | ns |
| SEMA3F    | -0.02316376 | -0.02214061 | -3.94503147 | 8.0145384831 | 0.001292953 | 0.692898541 | ns |
| LRP11     | -0.0297707  | -0.02729547 | -3.94305281 | 8.0809085868 | 0.001296497 | 0.685162544 | ns |
| ISM1      | -0.03382449 | -0.03915717 | -3.94148158 | 8.1338973471 | 0.001297868 | 0.677003032 | ns |
| HGF       | -0.03120691 | -0.04313962 | -3.93806378 | 8.2500440359 | 0.001309246 | 0.659256819 | ns |
| LGALS9    | -0.02812784 | -0.04005442 | -3.92859809 | 8.5817375915 | 0.001354523 | 0.628597393 | ns |
| IL19      | -0.0584084  | -0.00312237 | -3.91997588 | 8.8952474862 | 0.001396458 | 0.603856701 | ns |
| STC1      | -0.03709145 | -0.02194037 | -3.90743009 | 9.3679122746 | 0.001462797 | 0.540079445 | ns |
| AHSG      | -0.02150113 | -0.01146139 | -3.89924211 | 9.6901487045 | 0.001504034 | 0.510268211 | ns |
| ADGRG1    | -0.05294034 | 0.085784056 | -3.89813438 | 9.7350129700 | 0.001504034 | 0.510982952 | ns |
| ST3GAL1   | 0.037429241 | 0.060155425 | 3.890780972 | 0.000100345  | 0.001542149 | 0.482594159 | ns |
| KRT19     | -0.05472328 | 0.016545685 | -3.87796544 | 0.000105774  | 0.001617064 | 0.4316253   | ns |
| IGFBP3    | 0.023193248 | -0.00385257 | 3.862912326 | 0.000112503  | 0.00171099  | 0.373804376 | ns |
| TNFRSF11A | -0.03106236 | -0.0354379  | -3.85675456 | 0.000115366  | 0.001745435 | 0.345072001 | ns |
| CCL22     | -0.04368552 | -0.04447282 | -3.8522423  | 0.000117522  | 0.001768888 | 0.338287652 | ns |
| RBFOX3    | -0.02880542 | -0.03056084 | -3.84699453 | 0.000120054  | 0.001797729 | 0.307769239 | ns |
| CALB2     | -0.0256374  | -0.00223921 | -3.84453891 | 0.000121276  | 0.001806761 | 0.310775471 | ns |
| CDNF      | -0.02566901 | -0.00268305 | -3.83654906 | 0.000125276  | 0.00185689  | 0.274876877 | ns |
| SNAP25    | -0.03603262 | 0.03154438  | -3.83392926 | 0.000126625  | 0.0018674   | 0.270309158 | ns |
| MEP1A     | -0.05522809 | 0.00702397  | -3.82436771 | 0.000131623  | 0.001931351 | 0.223574147 | ns |
| CCN3      | -0.02628364 | -0.02570954 | -3.80897317 | 0.000140084  | 0.002045229 | 0.16512784  | ns |
| TREM2     | -0.04233138 | -0.06070506 | -3.7939874  | 0.000148817  | 0.002161921 | 0.113545176 | ns |
| LRIG1     | -0.02852797 | -0.02725682 | -3.78914979 | 0.000151736  | 0.002193416 | 0.089430136 | ns |
| CLMP      | -0.01790673 | -0.01790542 | -3.77162532 | 0.00016279   | 0.002337243 | 0.022527274 | ns |
| SPON1     | -0.02588615 | -0.03630137 | -3.7708738  | 0.000163287  | 0.002337243 | 0.025633501 | ns |
| SFTPA2    | -0.04118026 | 0.029464584 | -3.76820786 | 0.000165051  | 0.002350977 | 0.023559469 | ns |
| IGSF8     | -0.02424183 | -0.02036144 | -3.76366539 | 0.000168066  | 0.002382296 | -9.70E-05   | ns |
| PPL       | -0.02465401 | -0.00607081 | -3.75494563 | 0.000174033  | 0.002454952 | -0.02467763 | ns |
| FBLN2     | -0.02264133 | -0.00874705 | -3.74775272 | 0.000179074  | 0.002513928 | -0.06455121 | ns |
| BAMBI     | -0.02341291 | 0.002512311 | -3.73809909 | 0.000186104  | 0.002600108 | -0.08845558 | ns |
| LAYN      | -0.0256415  | -0.00549234 | -3.73615053 | 0.000187541  | 0.002607711 | -0.10052302 | ns |
| AREG      | -0.03593174 | 0.02018985  | -3.72540402 | 0.000195704  | 0.002708317 | -0.14173372 | ns |
| IL6       | -0.0610138  | -0.00484653 | -3.72129137 | 0.000198916  | 0.00273979  | -0.15691484 | ns |
| GFRA2     | -0.016755   | -0.0100504  | -3.71935284 | 0.000200448  | 0.002747921 | -0.16406477 | ns |
| FABP5     | -0.05714523 | -0.02514401 | -3.71611427 | 0.000203024  | 0.002769685 | -0.1812727  | ns |
| NELL1     | 0.032729428 | 0.038081458 | 3.71479467  | 0.000204086  | 0.002769685 | -0.18488872 | ns |
| PLTP      | 0.029808528 | 0.006951874 | 3.713809754 | 0.000204881  | 0.002769685 | -0.18892914 | ns |
| VSIG4     | -0.03190339 | -0.04366268 | -3.70385453 | 0.000213092  | 0.002867408 | -0.22389024 | ns |
| TNFRSF13B | -0.02704097 | -0.01794622 | -3.70186868 | 0.000214766  | 0.002870131 | -0.22998414 | ns |
| IL1R1     | -0.01749426 | -0.01258122 | -3.70128686 | 0.00021526   | 0.002870131 | -0.23225927 | ns |
| CCL15     | -0.03450433 | 0.03510263  | -3.69697247 | 0.000218938  | 0.0029059   | -0.25288645 | ns |
| LGALS1    | -0.02719131 | -0.03511353 | -3.68335368 | 0.000230978  | 0.003051835 | -0.29656869 | ns |
| HS6ST2    | -0.02411379 | 0.026341478 | -3.67756728 | 0.00023629   | 0.003107953 | -0.30972074 | ns |

|          |             |             |             |             |             |             |    |
|----------|-------------|-------------|-------------|-------------|-------------|-------------|----|
| SCARB2   | -0.02251376 | -0.02528381 | -3.67522608 | 0.000238466 | 0.003115937 | -0.31831606 | ns |
| PTPRS    | -0.01931551 | 0.002261013 | -3.67459336 | 0.000239031 | 0.003115937 | -0.33467337 | ns |
| DCBLD2   | -0.02691207 | -0.02543758 | -3.66783152 | 0.000245438 | 0.003176231 | -0.35676956 | ns |
| GRN      | -0.01918842 | -0.01926381 | -3.66671281 | 0.000246522 | 0.003176231 | -0.35673454 | ns |
| ADIPOQ   | 0.051594425 | 0.057234325 | 3.666288117 | 0.000246919 | 0.003176231 | -0.36420828 | ns |
| IGSF3    | -0.02756497 | 0.002100542 | -3.65242357 | 0.000260644 | 0.003338073 | -0.40864133 | ns |
| AMN      | -0.03814656 | -0.00356769 | -3.64772403 | 0.000265464 | 0.003384951 | -0.42009245 | ns |
| COL18A1  | -0.01810204 | -0.03496446 | -3.63992479 | 0.000273613 | 0.003464586 | -0.45527785 | ns |
| TFRC     | -0.03089503 | 0.008120676 | -3.63948292 | 0.000274082 | 0.003464586 | -0.45764757 | ns |
| GFER     | -0.05209892 | 0.021887839 | -3.62596525 | 0.000288835 | 0.003635338 | -0.49774134 | ns |
| CD80     | -0.02397172 | -0.01691122 | -3.61930463 | 0.000296337 | 0.00371375  | -0.53419217 | ns |
| CCL3     | -0.0436025  | -0.02506131 | -3.6166492  | 0.000299398 | 0.003736084 | -0.54002207 | ns |
| AKR1B1   | -0.06022967 | -0.02913306 | -3.61067725 | 0.000306391 | 0.00380259  | -0.55257833 | ns |
| REG3A    | -0.04773765 | 0.007334635 | -3.60985568 | 0.000307333 | 0.00380259  | -0.56847311 | ns |
| SELENOP  | 0.016236221 | 0.003889723 | 3.608611792 | 0.000308809 | 0.003804741 | -0.57223074 | ns |
| GDF2     | -0.02854649 | 0.019448341 | -3.60320893 | 0.000315309 | 0.003868498 | -0.58606073 | ns |
| DPY30    | -0.04759107 | -0.00910265 | -3.5953172  | 0.000325005 | 0.003970771 | -0.6197064  | ns |
| CD300C   | -0.02621327 | -0.02114561 | -3.58684554 | 0.000335732 | 0.004054294 | -0.65100622 | ns |
| REG4     | -0.03650917 | -0.02641816 | -3.58672835 | 0.000335893 | 0.004054294 | -0.64600991 | ns |
| SERPINA1 | -0.00575362 | -0.00429912 | -3.58664906 | 0.000336007 | 0.004054294 | -0.64240613 | ns |
| SUSD5    | -0.02479779 | -0.0123051  | -3.58152462 | 0.000342672 | 0.00411771  | -0.65487641 | ns |
| ART3     | -0.02587308 | 0.031598704 | -3.56361471 | 0.000366892 | 0.004375141 | -0.72804826 | ns |
| PCDH12   | -0.0180202  | 0.000365436 | -3.56346276 | 0.000367092 | 0.004375141 | -0.73389263 | ns |
| ADAMTSL2 | -0.02286667 | -0.00973417 | -3.56214725 | 0.000368938 | 0.004379269 | -0.73719019 | ns |
| OSCAR    | -0.02609614 | -0.0420941  | -3.55917453 | 0.000373145 | 0.004410797 | -0.74362175 | ns |
| AIFM1    | -0.08246932 | -0.00148481 | -3.55814482 | 0.000374616 | 0.004410797 | -0.74477067 | ns |
| CLEC7A   | -0.04559407 | -0.12431534 | -3.54728048 | 0.000390377 | 0.004577914 | -0.79091496 | ns |
| FABP4    | -0.04589486 | -0.0562609  | -3.54560612 | 0.000392865 | 0.004588664 | -0.79640818 | ns |
| GP1BA    | -0.02509959 | 0.007094555 | -3.5384812  | 0.000403636 | 0.004685031 | -0.81266336 | ns |
| DDAH1    | -0.03442453 | 0.0037605   | -3.53731931 | 0.000405407 | 0.004685031 | -0.81889288 | ns |
| IL15     | -0.02516408 | -0.02098871 | -3.53618505 | 0.000407147 | 0.004685031 | -0.82535347 | ns |
| PALM     | -0.02130093 | -0.01213568 | -3.53582096 | 0.000407706 | 0.004685031 | -0.82623398 | ns |
| CYTL1    | -0.01661622 | -0.0130558  | -3.53389533 | 0.000410677 | 0.004685031 | -0.83658552 | ns |
| GPC1     | -0.02220013 | -0.00822718 | -3.53385115 | 0.000410742 | 0.004685031 | -0.83868178 | ns |
| KYNU     | -0.03501509 | -0.01720816 | -3.50047622 | 0.00046573  | 0.005291562 | -0.95446619 | ns |
| CALCB    | -0.02752531 | 0.028331241 | -3.49848777 | 0.000469217 | 0.005310513 | -0.96050031 | ns |
| ARSA     | -0.03442366 | 0.019352267 | -3.49581096 | 0.000473956 | 0.005343443 | -0.96645396 | ns |
| DDR1     | -0.01670664 | -0.00572732 | -3.49377904 | 0.000477563 | 0.005351618 | -0.97772859 | ns |
| HMCN2    | -0.04055003 | -0.04793224 | -3.49336034 | 0.000478347 | 0.005351618 | -0.96583999 | ns |
| EDN1     | -0.02024075 | -0.02383583 | -3.4888947  | 0.000486406 | 0.005421013 | -0.98116094 | ns |
| KHK      | -0.04649519 | -0.05240327 | -3.48700934 | 0.000489845 | 0.005438584 | -0.98768035 | ns |
| SLITRK6  | -0.02608559 | 0.001927655 | -3.48211991 | 0.000498871 | 0.005517816 | -1.00538571 | ns |
| LGMN     | -0.02747437 | -0.01921954 | -3.48056336 | 0.000501744 | 0.005528655 | -1.01992312 | ns |
| TIMP1    | -0.02056994 | -0.01831708 | -3.46513363 | 0.000531443 | 0.005833886 | -1.06210738 | ns |
| PRTN3    | -0.03548896 | -0.00236403 | -3.46153986 | 0.000538604 | 0.005890356 | -1.06867535 | ns |
| PALM2    | -0.02720149 | -0.01341872 | -3.46007813 | 0.000541472 | 0.005899618 | -1.09301962 | ns |
| SLC39A5  | -0.04096345 | -0.06035542 | -3.45896872 | 0.00054372  | 0.005902091 | -1.09314162 | ns |
| PAPPA    | -0.03487949 | -0.02010484 | -3.45281282 | 0.000556294 | 0.006016212 | -1.10611045 | ns |
| CCL18    | -0.0547937  | -0.03386284 | -3.4512785  | 0.000559464 | 0.006028178 | -1.11123926 | ns |
| CFC1     | -0.03497408 | 0.017080982 | -3.44949531 | 0.000563175 | 0.00604585  | -1.116652   | ns |
| ACVRL1   | -0.01741115 | -0.02774798 | -3.44709805 | 0.000568172 | 0.006077151 | -1.1300376  | ns |
| C19orf12 | -0.04722912 | 0.073978553 | -3.43846933 | 0.000586595 | 0.006246702 | -1.15510273 | ns |
| PDZD2    | -0.0429218  | 0.09565729  | -3.43768333 | 0.000588302 | 0.006246702 | -1.15623613 | ns |
| CD93     | -0.02250153 | -0.00281538 | -3.42241053 | 0.000622374 | 0.006565956 | -1.19785114 | ns |
| CHCHD6   | -0.01952046 | 0.005997195 | -3.42161709 | 0.000624111 | 0.006565956 | -1.22340303 | ns |
| SMOC2    | -0.02822734 | -0.02954394 | -3.42118127 | 0.000625115 | 0.006565956 | -1.22312048 | ns |
| SIGLEC1  | -0.03218587 | -0.0364217  | -3.41235597 | 0.000645694 | 0.006757803 | -1.25302144 | ns |
| TOMM20   | -0.05331078 | 0.041646656 | -3.39389219 | 0.000690795 | 0.007204005 | -1.31799623 | ns |
| CCL21    | -0.03004207 | -0.03138217 | -3.38318112 | 0.000718297 | 0.007464151 | -1.35131985 | ns |
| DMD      | -0.03608681 | 0.068997858 | -3.37570711 | 0.00073812  | 0.007619117 | -1.3663191  | ns |
| SEZ6L    | -0.02032995 | 0.011829324 | -3.37557625 | 0.000738428 | 0.007619117 | -1.37732977 | ns |
| MCAM     | 0.02448561  | 0.016806363 | 3.367113379 | 0.000761459 | 0.007790036 | -1.40324433 | ns |
| NT5C1A   | -0.0219954  | -0.01621346 | -3.36597238 | 0.000764596 | 0.007790036 | -1.41152567 | ns |
| ESAM     | -0.02227624 | -0.00190025 | -3.36592079 | 0.000764737 | 0.007790036 | -1.41217165 | ns |
| VSIG2    | -0.03696473 | 0.014193269 | -3.36558894 | 0.000765664 | 0.007790036 | -1.41195274 | ns |
| IL4R     | -0.02558748 | -0.01938261 | -3.36372762 | 0.000770856 | 0.00781562  | -1.41530953 | ns |

|             |             |             |             |             |             |             |    |
|-------------|-------------|-------------|-------------|-------------|-------------|-------------|----|
| CHGB        | -0.02954642 | -0.00350925 | -3.3612009  | 0.000777925 | 0.007860005 | -1.42649113 | ns |
| MSMB        | -0.05166654 | -0.09660219 | -3.34790693 | 0.000816215 | 0.008218445 | -1.46403521 | ns |
| LECT2       | -0.04468876 | -0.06099332 | -3.33887295 | 0.000843174 | 0.008440509 | -1.5016709  | ns |
| CES2        | -0.04097254 | 0.022069719 | -3.33859215 | 0.000844051 | 0.008440509 | -1.49632272 | ns |
| MUC13       | -0.03547873 | -0.03085114 | -3.32992748 | 0.000870771 | 0.008674709 | -1.5192887  | ns |
| PRND        | -0.03283359 | 0.015342246 | -3.32906482 | 0.000873412 | 0.008674709 | -1.53404735 | ns |
| MAGED1      | -0.03499853 | 0.037134512 | -3.32700239 | 0.00087996  | 0.008710113 | -1.52813228 | ns |
| TNFRSF11B   | -0.02084039 | -0.02346092 | -3.32213932 | 0.000895391 | 0.008826774 | -1.55101943 | ns |
| EPHA4       | -0.01886538 | 0.001125959 | -3.32139927 | 0.000897792 | 0.008826774 | -1.54749871 | ns |
| MPO         | -0.0339828  | -0.00808592 | -3.31167448 | 0.000929532 | 0.009108168 | -1.58794206 | ns |
| GLB1        | -0.02981803 | -0.00268415 | -3.31002479 | 0.000935038 | 0.009131475 | -1.59017347 | ns |
| TNFRSF10C   | -0.03599759 | -0.09670437 | -3.30709365 | 0.000944859 | 0.00919663  | -1.60212992 | ns |
| ZBTB17      | -0.02779887 | 0.004713698 | -3.30362152 | 0.000956671 | 0.00928066  | -1.60582644 | ns |
| SPINK6      | -0.04009203 | -0.11993858 | -3.30216436 | 0.000961586 | 0.009297451 | -1.62400139 | ns |
| STX4        | -0.04513384 | 0.071075477 | -3.2920521  | 0.000996846 | 0.00960625  | -1.64931989 | ns |
| MZB1        | -0.03649287 | -0.05932045 | -3.29085906 | 0.001001066 | 0.00960625  | -1.6559356  | ns |
| TRIM5       | -0.06245513 | -0.00204847 | -3.29020744 | 0.001003393 | 0.00960625  | -1.65786062 | ns |
| ERN1        | -0.02521623 | -0.00836406 | -3.28299836 | 0.001029374 | 0.009822782 | -1.68422386 | ns |
| MMP10       | -0.04337987 | 0.044186699 | -3.28178644 | 0.001033829 | 0.009830498 | -1.68269707 | ns |
| CDCP1       | -0.03507066 | -0.07187559 | -3.28094584 | 0.001036916 | 0.009830498 | -1.68519666 | ns |
| KRT14       | -0.02006176 | 0.012872668 | -3.26756178 | 0.001087291 | 0.010274726 | -1.70945822 | ns |
| PHLDB1      | -0.03593639 | -0.00647467 | -3.26496436 | 0.001097159 | 0.010334529 | -1.74261913 | ns |
| AHNAK2      | -0.01959433 | 0.007986883 | -3.26368676 | 0.001102175 | 0.0103484   | -1.73501841 | ns |
| SCARF1      | -0.02988703 | -0.00530759 | -3.26232521 | 0.001107411 | 0.010350873 | -1.7526538  | ns |
| VGF         | -0.01972309 | 0.015262499 | -3.26178286 | 0.001109528 | 0.010350873 | -1.75483987 | ns |
| DAB2        | -0.08080795 | -0.10293728 | -3.25543466 | 0.001134616 | 0.010545956 | -1.77595349 | ns |
| GSTA1       | -0.06417685 | -0.00775496 | -3.25468081 | 0.001137663 | 0.010545956 | -1.77103688 | ns |
| FOLR2       | -0.02070355 | -0.01235875 | -3.25143916 | 0.001150675 | 0.010613396 | -1.78825493 | ns |
| SMAD1       | -0.05909352 | 0.030859878 | -3.25107924 | 0.001152208 | 0.010613396 | -1.77571795 | ns |
| AGR2        | -0.07025817 | -0.02632782 | -3.24308665 | 0.001185012 | 0.010831811 | -1.79986994 | ns |
| ADGRE1      | -0.03600239 | 0.019804601 | -3.24245737 | 0.001187548 | 0.010831811 | -1.81524316 | ns |
| RTN4IP1     | -0.06022112 | -0.01789122 | -3.24203124 | 0.001189315 | 0.010831811 | -1.81853998 | ns |
| MANSC1      | -0.01865986 | -0.00295025 | -3.24168887 | 0.001190757 | 0.010831811 | -1.8166218  | ns |
| FGF23       | -0.03874461 | 0.061514744 | -3.24072525 | 0.001194777 | 0.010834623 | -1.82275287 | ns |
| PDLIM5      | -0.07894468 | -0.09499585 | -3.2327546  | 0.001228588 | 0.011090195 | -1.84832434 | ns |
| IQGAP2      | -0.03889883 | 0.000275428 | -3.23230582 | 0.001230556 | 0.011090195 | -1.84258762 | ns |
| CGREF1      | -0.02974631 | -0.01338478 | -3.23117288 | 0.001235439 | 0.011099945 | -1.84663292 | ns |
| ROR1        | -0.02158932 | -0.00128194 | -3.21557828 | 0.001304523 | 0.01168468  | -1.89647962 | ns |
| GAPDH       | -0.02269369 | -0.08122497 | -3.21353824 | 0.001313914 | 0.01173008  | -1.88617704 | ns |
| RBP5        | -0.04105335 | -0.0139115  | -3.21270718 | 0.001317625 | 0.01173008  | -1.90521554 | ns |
| PCDH9       | -0.02168894 | -0.00992646 | -3.21044376 | 0.00132801  | 0.011786592 | -1.91767821 | ns |
| GAST        | -0.07682737 | 0.237719385 | -3.20747768 | 0.001341765 | 0.01185131  | -1.92813702 | ns |
| AXL         | -0.01889893 | 0.001915937 | -3.2071286  | 0.001343419 | 0.01185131  | -1.92473228 | ns |
| UPB1        | -0.06162532 | -0.00720081 | -3.20499999 | 0.001353363 | 0.01190307  | -1.93606755 | ns |
| SBSN        | -0.02213173 | 0.002892931 | -3.20389869 | 0.001358553 | 0.011912838 | -1.93796495 | ns |
| ESYT2       | -0.05457047 | 0.031658512 | -3.20206971 | 0.001367194 | 0.011952716 | -1.9453253  | ns |
| TCN2        | -0.02092032 | -0.01894231 | -3.19873964 | 0.001383076 | 0.012055473 | -1.95538949 | ns |
| MEGF10      | 0.027980196 | 0.010438591 | 3.19398125  | 0.001406091 | 0.012219601 | -1.96506649 | ns |
| BMPER       | -0.01441896 | -0.01125567 | -3.19141    | 0.001418692 | 0.012292521 | -1.96720244 | ns |
| SELE        | -0.03692144 | -0.10645912 | -3.18596432 | 0.001445581 | 0.012488449 | -1.99682062 | ns |
| DEFB4A_DEFB | -0.10237879 | -0.14645893 | -3.18223743 | 0.001464367 | 0.012613428 | -1.99861493 | ns |
| ADAM8       | -0.01966046 | -0.02241135 | -3.17711197 | 0.001490416 | 0.012800044 | -2.02440653 | ns |
| TFF3        | -0.03095868 | 0.034613405 | -3.174071   | 0.001506152 | 0.012897252 | -2.02649401 | ns |
| KLRB1       | -0.02539808 | 0.003513487 | -3.17097061 | 0.001522258 | 0.012997055 | -2.04448985 | ns |
| SLAMF6      | -0.02584259 | -0.01333314 | -3.16631498 | 0.001546917 | 0.013169086 | -2.04539175 | ns |
| CDH1        | -0.02762674 | 0.007051752 | -3.16129907 | 0.001573856 | 0.013324448 | -2.05048871 | ns |
| PENK        | -0.01865328 | -0.00879142 | -3.16120173 | 0.001574293 | 0.013324448 | -2.06234178 | ns |
| PLIN3       | -0.02945516 | 0.011751979 | -3.15868096 | 0.00158793  | 0.013401024 | -2.07630433 | ns |
| KAZALD1     | -0.031345   | -0.03563132 | -3.15547674 | 0.001605466 | 0.01350997  | -2.08591956 | ns |
| CLEC4A      | 0.024214745 | 0.005587358 | 3.151852585 | 0.001625503 | 0.01362831  | -2.09979412 | ns |
| FAS         | -0.02261138 | -0.00716048 | -3.15124542 | 0.001628863 | 0.01362831  | -2.10398034 | ns |
| QPCT        | -0.0184019  | -0.03056179 | -3.15014129 | 0.001635048 | 0.013640976 | -2.10402466 | ns |
| CRACR2A     | -0.05991858 | 0.108605813 | -3.14764628 | 0.001649122 | 0.013719189 | -2.10382939 | ns |
| CLIP2       | -0.07917195 | -0.05597876 | -3.14365196 | 0.001671717 | 0.013850097 | -2.12539345 | ns |
| LIF         | -0.03584907 | 0.014678149 | -3.14252453 | 0.001678223 | 0.013850097 | -2.12061991 | ns |
| YES1        | -0.0796666  | -0.03419532 | -3.14236518 | 0.001679087 | 0.013850097 | -2.12686236 | ns |

|           |             |             |             |             |             |             |    |
|-----------|-------------|-------------|-------------|-------------|-------------|-------------|----|
| TPP1      | -0.03079749 | -0.01642557 | -3.13943305 | 0.001695994 | 0.013950147 | -2.13241588 | ns |
| F11R      | -0.03935681 | 0.017438556 | -3.13728964 | 0.001708396 | 0.014012685 | -2.14556261 | ns |
| SERPINA6  | 0.011059461 | 0.020901187 | 3.13601678  | 0.001715797 | 0.014033971 | -2.15269138 | ns |
| CD40      | -0.03416247 | 0.023642807 | -3.13129831 | 0.001743627 | 0.014221763 | -2.16188347 | ns |
| SLURP1    | -0.02375228 | 0.000671023 | -3.12909363 | 0.001756743 | 0.014288826 | -2.17094144 | ns |
| FLRT2     | -0.01894135 | -0.00756602 | -3.11875096 | 0.001819572 | 0.014724724 | -2.19985121 | ns |
| HJV       | -0.02885975 | -0.01201012 | -3.11860464 | 0.00182042  | 0.014724724 | -2.20784645 | ns |
| TXNDC5    | -0.04679779 | 0.024704223 | -3.11755454 | 0.001826917 | 0.014736455 | -2.21110153 | ns |
| IFNGR1    | -0.01363069 | -0.00138398 | -3.11567605 | 0.001838606 | 0.01478989  | -2.21332628 | ns |
| CCL20     | -0.05841337 | 0.014891783 | -3.1089319  | 0.001881043 | 0.015089688 | -2.23768898 | ns |
| MYH9      | -0.07236132 | -0.01766112 | -3.09851806 | 0.001948394 | 0.015553756 | -2.26838682 | ns |
| SPINK2    | -0.02286969 | -0.02333042 | -3.09835461 | 0.001949546 | 0.015553756 | -2.2573798  | ns |
| DPP10     | -0.02267034 | 0.009161886 | -3.09498447 | 0.001971774 | 0.015688227 | -2.27594489 | ns |
| RTN4R     | -0.0242095  | -0.03712188 | -3.09139884 | 0.001995688 | 0.015835347 | -2.2922314  | ns |
| PPP1R12A  | -0.06532049 | 0.033457035 | -3.08456963 | 0.00204207  | 0.016159472 | -2.30949825 | ns |
| MGMT      | -0.08381223 | -0.18246909 | -3.08374945 | 0.002047726 | 0.016160433 | -2.3103668  | ns |
| DUT       | -0.06443462 | -0.03891855 | -3.08289074 | 0.002053612 | 0.016163202 | -2.31573477 | ns |
| ADGRD1    | 0.023734162 | -0.01126659 | 3.079544777 | 0.002076883 | 0.016302414 | -2.31499322 | ns |
| CPXM2     | -0.01530767 | -0.0228814  | -3.07834286 | 0.002085191 | 0.016323746 | -2.33070904 | ns |
| LAMA4     | -0.02194352 | -0.00547047 | -3.07529055 | 0.002106655 | 0.016447684 | -2.33730686 | ns |
| SCN4B     | -0.02575121 | -0.01807436 | -3.07153428 | 0.002133341 | 0.016612149 | -2.33852664 | ns |
| TNFSF13B  | -0.01779934 | -0.01005825 | -3.06964423 | 0.002146848 | 0.016672329 | -2.3568046  | ns |
| VIT       | -0.02282141 | -0.04245974 | -3.06593794 | 0.00217362  | 0.016826845 | -2.36850626 | ns |
| HTRA2     | -0.04149665 | 0.025624336 | -3.06530033 | 0.00217827  | 0.016826845 | -2.36826199 | ns |
| EDA2R     | -0.02281264 | -0.05887849 | -3.0603828  | 0.002214316 | 0.017060169 | -2.38685347 | ns |
| MYOM3     | 0.057587416 | 0.000596725 | 3.05670003  | 0.002241779 | 0.017226302 | -2.38449413 | ns |
| TRIAP1    | -0.04280411 | -0.0090717  | -3.05267326 | 0.002271964 | 0.017372435 | -2.41022543 | ns |
| KLK8      | -0.02343953 | -0.02051705 | -3.05215477 | 0.002276044 | 0.017372435 | -2.39317558 | ns |
| FCRL1     | -0.03030044 | -0.0024533  | -3.05179846 | 0.002278645 | 0.017372435 | -2.40543945 | ns |
| IGFBPL1   | -0.02122951 | -0.00875039 | -3.04778755 | 0.002309259 | 0.017559989 | -2.41757042 | ns |
| TNFRSF10A | -0.02183588 | -0.04336158 | -3.04042043 | 0.002366483 | 0.017948393 | -2.43906948 | ns |
| CFI       | -0.01359497 | -0.0294017  | -3.03680952 | 0.00239494  | 0.018078786 | -2.4563724  | ns |
| MSLN      | -0.03721524 | 0.033705889 | -3.0366762  | 0.002396058 | 0.018078786 | -2.44955568 | ns |
| DECR1     | -0.06405919 | -0.04681159 | -3.0349874  | 0.002409486 | 0.018133247 | -2.45831529 | ns |
| IL5RA     | -0.03706853 | -0.01403151 | -3.03268895 | 0.002427901 | 0.018224864 | -2.46523086 | ns |
| MTDH      | -0.05705524 | -0.00682864 | -3.03072236 | 0.002443844 | 0.018297495 | -2.46071319 | ns |
| FAM3D     | -0.05208212 | 0.096593424 | -3.02814153 | 0.002464684 | 0.018406337 | -2.48164829 | ns |
| RGCC      | -0.04732415 | -0.03088473 | -3.02593036 | 0.002482753 | 0.018452326 | -2.49023666 | ns |
| MIA       | -0.02388996 | 0.014763211 | -3.02584446 | 0.002483481 | 0.018452326 | -2.4874392  | ns |
| CEACAM16  | -0.04946892 | -0.02144254 | -3.02119659 | 0.002521894 | 0.018690177 | -2.5024822  | ns |
| ERBB4     | 0.015542389 | 0.011304172 | 3.014146332 | 0.002581219 | 0.019081413 | -2.52247722 | ns |
| SPINT1    | -0.01571639 | -0.01325497 | -3.00706444 | 0.002642124 | 0.019482326 | -2.54020642 | ns |
| FOLR1     | -0.01768588 | 0.006530722 | -3.00108686 | 0.002694492 | 0.019818432 | -2.55926593 | ns |
| VCAM1     | -0.01738362 | 0.000291885 | -2.99928549 | 0.002710481 | 0.019885943 | -2.56380634 | ns |
| POLR2F    | -0.02269715 | -0.00156641 | -2.99737908 | 0.00272749  | 0.019960575 | -2.56825198 | ns |
| FETUB     | -0.02245148 | -0.03306284 | -2.99051666 | 0.002789484 | 0.020363232 | -2.58985121 | ns |
| HNMT      | -0.03133577 | -0.05734174 | -2.98855588 | 0.002807478 | 0.020443478 | -2.59138847 | ns |
| PPP1R9B   | -0.06332575 | 0.021549955 | -2.9866363  | 0.002825052 | 0.020520277 | -2.60737288 | ns |
| SIGLEC10  | -0.02164338 | -0.01629258 | -2.97914507 | 0.002895063 | 0.020976634 | -2.62485293 | ns |
| MET       | 0.013039194 | 0.019595455 | 2.977155394 | 0.002913878 | 0.021060706 | -2.63283856 | ns |
| PGF       | -0.01557464 | -0.02196675 | -2.96908014 | 0.002991488 | 0.021536542 | -2.65922671 | ns |
| AK2       | -0.06499514 | -0.03490324 | -2.96877537 | 0.002994464 | 0.021536542 | -2.65923064 | ns |
| RETN      | -0.02656075 | -0.01707067 | -2.9660095  | 0.003021587 | 0.021678219 | -2.65943375 | ns |
| SGSH      | -0.03407753 | -0.01126797 | -2.96463963 | 0.003035065 | 0.021721543 | -2.66442369 | ns |
| MZT1      | -0.03363789 | 0.068944765 | -2.96178871 | 0.003063356 | 0.021870414 | -2.66678788 | ns |
| NDUFS6    | -0.05137861 | 0.046530358 | -2.96049191 | 0.003076274 | 0.021909077 | -2.67059569 | ns |
| LGALS3    | -0.01931521 | -0.02689129 | -2.95456864 | 0.003135823 | 0.022278837 | -2.69638497 | ns |
| LHB       | -0.05682613 | 0.17978426  | -2.95304958 | 0.003151379 | 0.022335017 | -2.69241642 | ns |
| CDH3      | -0.0218371  | 0.008297827 | -2.95222659 | 0.00315964  | 0.022339343 | -2.70875472 | ns |
| FNTA      | -0.02138057 | 0.02094789  | -2.94583566 | 0.00322564  | 0.02272009  | -2.72564282 | ns |
| PRDX3     | -0.04608107 | 0.01579031  | -2.94547673 | 0.003229492 | 0.02272009  | -2.71540006 | ns |
| CTSL      | -0.01497333 | -0.0219277  | -2.94476746 | 0.003236835 | 0.02272009  | -2.72369306 | ns |
| HCLS1     | -0.03649482 | -0.04580436 | -2.93947608 | 0.003292517 | 0.023055517 | -2.74597365 | ns |
| ERBIN     | -0.06725031 | -0.05398046 | -2.93677837 | 0.003321352 | 0.023201786 | -2.74657199 | ns |
| TREML2    | -0.02146718 | -0.00246043 | -2.93549213 | 0.003335122 | 0.023242375 | -2.75324548 | ns |
| MPHOSPH8  | -0.04737414 | 0.034927246 | -2.93317914 | 0.003360156 | 0.023308944 | -2.75126605 | ns |

|          |             |             |             |             |             |             |    |
|----------|-------------|-------------|-------------|-------------|-------------|-------------|----|
| PILRA    | -0.02647486 | -0.07638171 | -2.93312527 | 0.003360639 | 0.023308944 | -2.7601336  | ns |
| OTUD7B   | -0.03842716 | 0.023676332 | -2.93095769 | 0.003384114 | 0.023416145 | -2.77080292 | ns |
| LILRB4   | -0.02774435 | -0.03482651 | -2.92950505 | 0.0034001   | 0.023471137 | -2.76192437 | ns |
| MVK      | -0.05000822 | -0.01441882 | -2.92069927 | 0.003497633 | 0.024087474 | -2.78746691 | ns |
| NOTCH1   | -0.00986107 | 0.001643544 | -2.91754819 | 0.003533013 | 0.024219132 | -2.80925742 | ns |
| CXADR    | -0.0325225  | 0.043997185 | -2.91752426 | 0.003533339 | 0.024219132 | -2.80503847 | ns |
| TARS1    | -0.02214452 | 0.01433718  | -2.91339327 | 0.003580364 | 0.024428169 | -2.81991094 | ns |
| CALCA    | -0.03877282 | 0.02962224  | -2.91338185 | 0.003580567 | 0.024428169 | -2.81290301 | ns |
| NOMO1    | -0.01558163 | -0.02945913 | -2.90957187 | 0.003624431 | 0.024669784 | -2.82837693 | ns |
| PDZK1    | -0.02611745 | 0.020532367 | -2.90802794 | 0.003642479 | 0.024734971 | -2.82197373 | ns |
| ADH4     | -0.05660315 | -0.03484316 | -2.90049199 | 0.003731161 | 0.025278401 | -2.84581243 | ns |
| SCG2     | -0.01950309 | 0.003569741 | -2.89790157 | 0.003761965 | 0.0254281   | -2.86494781 | ns |
| PCSK9    | -0.02520933 | -0.02306852 | -2.89708747 | 0.003771715 | 0.025435121 | -2.86825977 | ns |
| CD84     | -0.01991073 | -0.00421392 | -2.89262249 | 0.003825773 | 0.025721531 | -2.87678658 | ns |
| NRCAM    | -0.01733213 | 0.002249471 | -2.89212846 | 0.003831803 | 0.025721531 | -2.87605072 | ns |
| NRN1     | -0.02106783 | 0.02868848  | -2.88061233 | 0.003974468 | 0.026591596 | -2.91590792 | ns |
| FOLR3    | -0.1204716  | -2.48704626 | -2.88020606 | 0.003979633 | 0.026591596 | -2.91323886 | ns |
| GDNF     | -0.02361603 | -0.0150574  | -2.87923082 | 0.003992077 | 0.026613843 | -2.90671067 | ns |
| USP47    | -0.0515179  | 0.166035214 | -2.87728159 | 0.004016821 | 0.026717808 | -2.91067834 | ns |
| MXRA8    | 0.018475885 | 0.034231663 | 2.87325333  | 0.004068329 | 0.026998914 | -2.92385618 | ns |
| CX3CL1   | -0.02040335 | 0.008456181 | -2.86822312 | 0.004133498 | 0.027369195 | -2.94358747 | ns |
| AMOT     | -0.02392972 | 0.015524282 | -2.86746232 | 0.004143491 | 0.027373287 | -2.94033991 | ns |
| ARSB     | -0.03512877 | -0.00677018 | -2.86511158 | 0.004174301 | 0.027514582 | -2.95275924 | ns |
| MAN1A2   | 0.01513506  | -0.00399554 | 2.861618458 | 0.004220639 | 0.027757354 | -2.9560336  | ns |
| TMSB10   | -0.04855367 | -0.04443116 | -2.85684801 | 0.004284447 | 0.028113677 | -2.97914628 | ns |
| LAT2     | -0.07967629 | 0.02581102  | -2.85570229 | 0.004299956 | 0.028152175 | -2.97945215 | ns |
| CCL7     | -0.03767558 | -0.02767532 | -2.85479825 | 0.00431219  | 0.028169115 | -2.9845922  | ns |
| KIAA0319 | -0.01767104 | 0.017264363 | -2.85360753 | 0.004328317 | 0.028211349 | -2.99177803 | ns |
| TDRKH    | -0.05384107 | 0.085080033 | -2.84924455 | 0.004388258 | 0.028538336 | -2.99188253 | ns |
| IMMT     | -0.02522009 | -0.00701378 | -2.84491497 | 0.004448168 | 0.028863667 | -3.01546542 | ns |
| APOM     | 0.016928324 | 0.01448561  | 2.842985313 | 0.00447522  | 0.02897482  | -3.01662197 | ns |
| RNASEH2A | -0.02911894 | 0.083288805 | -2.84225064 | 0.004485467 | 0.028976912 | -3.02478784 | ns |
| PDCD1LG2 | -0.01920908 | -0.01851512 | -2.83907366 | 0.004530433 | 0.029202794 | -3.02641087 | ns |
| HSDL2    | -0.02763695 | 0.00206624  | -2.83676585 | 0.004563377 | 0.029350357 | -3.02625264 | ns |
| FGF21    | -0.07536877 | -0.12870227 | -2.83001574 | 0.004660556 | 0.029756315 | -3.05909741 | ns |
| CD55     | -0.01599961 | -0.00149866 | -2.82975337 | 0.004664699 | 0.029756315 | -3.03496238 | ns |
| CXCL1    | -0.06003402 | 0.068295683 | -2.82956644 | 0.004667176 | 0.029756315 | -3.05380481 | ns |
| SDC1     | -0.02323631 | -0.00568996 | -2.82956087 | 0.004667258 | 0.029756315 | -3.05357507 | ns |
| AGR3     | -0.03727475 | 0.008485074 | -2.82768125 | 0.004694852 | 0.029867033 | -3.05102283 | ns |
| IL15RA   | -0.02132989 | -0.0277225  | -2.82272077 | 0.004768026 | 0.0302666   | -3.06648688 | ns |
| EGLN1    | -0.0330383  | 0.007027714 | -2.82069686 | 0.004798096 | 0.030317632 | -3.08057201 | ns |
| SERPINH1 | -0.07471981 | -0.02301683 | -2.82020621 | 0.004805466 | 0.030317632 | -3.07838489 | ns |
| CTBS     | -0.01563908 | -0.02082867 | -2.82009003 | 0.004807214 | 0.030317632 | -3.07809174 | ns |
| PLXNB3   | -0.02903343 | 0.018616671 | -2.81622596 | 0.004865391 | 0.030618406 | -3.08900548 | ns |
| IDUA     | -0.0282396  | -0.06730344 | -2.8128483  | 0.004916649 | 0.030820511 | -3.10786318 | ns |
| LTA      | -0.02474044 | -0.01785238 | -2.81272426 | 0.004918616 | 0.030820511 | -3.10284507 | ns |
| GPR37    | -0.03950649 | -0.09750955 | -2.81065088 | 0.00495052  | 0.030953998 | -3.10022251 | ns |
| MAMDC4   | 0.031222198 | 0.011583313 | 2.800623375 | 0.005106736 | 0.031816973 | -3.13947513 | ns |
| HNRNPK   | -0.0464644  | 0.051842254 | -2.80040811 | 0.005110329 | 0.031816973 | -3.12660337 | ns |
| LBP      | -0.03591023 | -0.06112739 | -2.79533843 | 0.005190978 | 0.032151821 | -3.15040882 | ns |
| CD207    | -0.02319274 | -0.00969881 | -2.79396206 | 0.005213249 | 0.032151821 | -3.144744   | ns |
| CREG1    | -0.02337966 | -0.00221972 | -2.79391231 | 0.005213995 | 0.032151821 | -3.14842458 | ns |
| ALDH3A1  | -0.03882507 | 0.035957889 | -2.79376841 | 0.005216247 | 0.032151821 | -3.15468828 | ns |
| ERMAP    | -0.02572681 | -0.01702093 | -2.79265734 | 0.005234308 | 0.032151821 | -3.14806789 | ns |
| RP2      | -0.02608075 | 0.025341801 | -2.79112306 | 0.005259059 | 0.032151821 | -3.16028791 | ns |
| EGFL7    | -0.0245998  | -0.00495129 | -2.7906352  | 0.005267098 | 0.032151821 | -3.15494836 | ns |
| ITGBL1   | -0.01934566 | 0.002287456 | -2.79024442 | 0.005273268 | 0.032151821 | -3.16865576 | ns |
| CD99L2   | -0.01490439 | -0.01799669 | -2.78999421 | 0.00527739  | 0.032151821 | -3.16636146 | ns |
| KCTD5    | -0.02555758 | -0.00222491 | -2.7891295  | 0.005291573 | 0.032151821 | -3.16289371 | ns |
| TMPRSS15 | -0.05607885 | -0.00061091 | -2.78900439 | 0.005293568 | 0.032151821 | -3.16615063 | ns |
| PTEN     | -0.01803882 | -0.00554402 | -2.78824447 | 0.005306096 | 0.032151821 | -3.16239578 | ns |
| ATXN10   | -0.04397514 | -0.02471162 | -2.78817382 | 0.005307253 | 0.032151821 | -3.16259113 | ns |
| MDK      | -0.03113605 | -0.00417166 | -2.78441817 | 0.005368914 | 0.032458028 | -3.18308189 | ns |
| NRP2     | -0.01742161 | -0.00977445 | -2.78168429 | 0.005414351 | 0.032665092 | -3.18932286 | ns |
| KIRREL1  | -0.03340501 | 0.123520414 | -2.77939988 | 0.005452688 | 0.032828552 | -3.18691092 | ns |
| GZMB     | 0.038701812 | 0.032553069 | 2.775039719 | 0.005526175 | 0.033202533 | -3.20727197 | ns |



|             |             |             |             |             |             |             |    |
|-------------|-------------|-------------|-------------|-------------|-------------|-------------|----|
| CHGA        | -0.04387885 | 0.07489896  | -2.77359369 | 0.005550723 | 0.033281541 | -3.21460164 | ns |
| RNF41       | -0.04158441 | 0.040599887 | -2.77269538 | 0.005566254 | 0.033306276 | -3.20443576 | ns |
| CXCL17      | -0.02686924 | -0.04873897 | -2.77073524 | 0.005599637 | 0.033437502 | -3.2238437  | ns |
| XCL1        | -0.03388958 | 0.011526021 | -2.76197659 | 0.005752017 | 0.034277324 | -3.24851987 | ns |
| MANSC4      | -0.03603995 | 0.052623327 | -2.76095876 | 0.005770184 | 0.034315556 | -3.23586915 | ns |
| IL16        | -0.02526546 | -0.03643258 | -2.75869397 | 0.005810076 | 0.034482565 | -3.25686579 | ns |
| CA5A        | -0.05590418 | -0.01591403 | -2.75692132 | 0.005841862 | 0.034547759 | -3.24855188 | ns |
| PDLIM7      | -0.07793607 | 0.018858306 | -2.75673091 | 0.005845103 | 0.034547759 | -3.25862468 | ns |
| HPGDS       | 0.022277496 | 0.012222108 | 2.756059397 | 0.005857282 | 0.034547759 | -3.25004157 | ns |
| KIFBP       | -0.0504088  | -0.1074722  | -2.75543292 | 0.005868386 | 0.034547759 | -3.25845521 | ns |
| TGFA        | -0.02739596 | 0.008263632 | -2.75112377 | 0.005946085 | 0.034934747 | -3.27281511 | ns |
| DNM3        | -0.03079959 | 0.052783543 | -2.7504553  | 0.005958144 | 0.034935304 | -3.27940615 | ns |
| TAX1BP1     | -0.03649237 | 0.078405696 | -2.74936559 | 0.005977991 | 0.034981432 | -3.28144586 | ns |
| CTSD        | -0.02353671 | 0.007988467 | -2.74582863 | 0.006043427 | 0.035251429 | -3.25231008 | ns |
| CNST        | -0.06514668 | -0.05921551 | -2.74553536 | 0.006048276 | 0.035251429 | -3.28588061 | ns |
| CD160       | -0.02704579 | 0.001850212 | -2.74276761 | 0.006099361 | 0.035478352 | -3.30032168 | ns |
| SLMAP       | -0.04734619 | 0.053210249 | -2.73687517 | 0.006209668 | 0.035979349 | -3.3143869  | ns |
| KLK6        | -0.01764248 | -0.00094985 | -2.73640272 | 0.006218612 | 0.035979349 | -3.3135306  | ns |
| SCLY        | -0.02903695 | -0.00612037 | -2.73619756 | 0.006222456 | 0.035979349 | -3.31752433 | ns |
| CD274       | -0.01986006 | -0.00287671 | -2.73474119 | 0.006250135 | 0.036067973 | -3.31446295 | ns |
| EFNB2       | -0.0326082  | 0.027226755 | -2.73209791 | 0.006300552 | 0.036287201 | -3.31587138 | ns |
| GIP         | -0.02872869 | 0.075396273 | -2.73075121 | 0.006326358 | 0.036312957 | -3.31891664 | ns |
| CPE         | 0.023304811 | -0.03581652 | 2.73055835  | 0.006329896 | 0.036312957 | -3.33083289 | ns |
| DEFA1_DEFA1 | -0.03034497 | 0.009762663 | -2.72673294 | 0.006403953 | 0.036655998 | -3.32360998 | ns |
| LEO1        | -0.01648894 | 0.00957895  | -2.72576116 | 0.006422534 | 0.036655998 | -3.3464765  | ns |
| MYDGF       | -0.05630572 | -0.03194386 | -2.72551428 | 0.006427353 | 0.036655998 | -3.34626294 | ns |
| SNAP29      | -0.05424212 | -0.03306719 | -2.7226152  | 0.006484018 | 0.036872495 | -3.35187614 | ns |
| PLCB2       | -0.05445307 | -0.04359001 | -2.72218842 | 0.006492364 | 0.036872495 | -3.3551963  | ns |
| P4HB        | -0.0233368  | -0.00640458 | -2.72164107 | 0.006503197 | 0.036872495 | -3.35165084 | ns |
| SLITRK1     | -0.0187371  | 0.037649771 | -2.7159603  | 0.006615937 | 0.037439022 | -3.3575552  | ns |
| DBI         | -0.04798376 | -0.00851293 | -2.71160681 | 0.006703282 | 0.037859927 | -3.37755692 | ns |
| SERPINA11   | -0.02428162 | -0.04257808 | -2.70461075 | 0.00684591  | 0.038590842 | -3.40299738 | ns |
| PTGR1       | 0.045254233 | 0.000851081 | 2.701717072 | 0.006905754 | 0.03885318  | -3.4103186  | ns |
| OMG         | 0.040036645 | 0.052601493 | 2.70003263  | 0.006940892 | 0.038975781 | -3.40833604 | ns |
| SIRT2       | -0.05332685 | -0.02350642 | -2.69926289 | 0.00695696  | 0.038991026 | -3.41039709 | ns |
| CEACAM6     | -0.02148346 | -0.00209125 | -2.69780921 | 0.006987305 | 0.039056505 | -3.42024985 | ns |
| WASHC3      | -0.04284715 | 0.072432157 | -2.6974234  | 0.006995395 | 0.039056505 | -3.42176354 | ns |
| TNFAIP2     | -0.02624822 | 0.023714261 | -2.69520087 | 0.007042226 | 0.039242937 | -3.42666081 | ns |
| LRRC59      | -0.02553754 | 0.06827152  | -2.69253443 | 0.007098748 | 0.039411688 | -3.43488574 | ns |
| MRC1        | -0.01570073 | -0.02580756 | -2.69163695 | 0.007117872 | 0.039411688 | -3.43616178 | ns |
| CLEC6A      | -0.027408   | -0.02380811 | -2.69137602 | 0.007123662 | 0.039411688 | -3.42475878 | ns |
| HIP1R       | -0.02347283 | 0.001337291 | -2.69092434 | 0.007133091 | 0.039411688 | -3.43804326 | ns |
| PRKAR1A     | -0.04972855 | -0.03534093 | -2.69060214 | 0.007140061 | 0.039411688 | -3.4339729  | ns |
| EPO         | -0.04472341 | 0.072446807 | -2.68997392 | 0.007153491 | 0.039411688 | -3.43782297 | ns |
| F2R         | -0.03424212 | -0.01192922 | -2.68536491 | 0.007252837 | 0.039860502 | -3.45012869 | ns |
| LETM1       | -0.02900721 | 0.027133092 | -2.6849277  | 0.007262256 | 0.039860502 | -3.45605615 | ns |
| DCTN2       | -0.05379088 | 0.080828497 | -2.68384809 | 0.00728585  | 0.039914977 | -3.45154797 | ns |
| VAT1        | -0.01143147 | 0.004499444 | -2.68117631 | 0.007344253 | 0.040159587 | -3.45865652 | ns |
| SCAMP3      | -0.05087791 | 0.02090481  | -2.68042924 | 0.007360659 | 0.040174062 | -3.46064293 | ns |
| RSPO3       | -0.01543669 | -0.01457522 | -2.6747832  | 0.007485597 | 0.040779744 | -3.48363856 | ns |
| PFDN2       | -0.03246469 | 0.000587926 | -2.67175154 | 0.007553763 | 0.041074464 | -3.47778599 | ns |
| GCNT1       | -0.01998805 | -0.01039401 | -2.67024714 | 0.007587555 | 0.041180035 | -3.48766113 | ns |
| ROBO1       | -0.01357671 | -0.00732379 | -2.6696341  | 0.007601383 | 0.041180035 | -3.49098401 | ns |
| KIRREL2     | -0.0231672  | 0.000188261 | -2.66811884 | 0.007635889 | 0.041248647 | -3.48740492 | ns |
| CACYBP      | -0.05649954 | -0.06890145 | -2.66673    | 0.007667474 | 0.041248647 | -3.49018862 | ns |
| GRAP2       | -0.07567037 | -0.10292451 | -2.66662034 | 0.00766987  | 0.041248647 | -3.49768686 | ns |
| ADA2        | -0.02398594 | -0.01800107 | -2.6665138  | 0.007672375 | 0.041248647 | -3.49394302 | ns |
| MSRA        | -0.04277759 | -0.01907864 | -2.66596869 | 0.007684679 | 0.041248647 | -3.50326279 | ns |
| CXCL16      | -0.0136411  | -0.020789   | -2.66019733 | 0.007817535 | 0.041884776 | -3.52030156 | ns |
| RPL14       | -0.02198494 | 0.018893004 | -2.65933274 | 0.007837833 | 0.041916618 | -3.50979737 | ns |
| B4GALT1     | -0.01533472 | -0.01137044 | -2.657174   | 0.007887998 | 0.042107775 | -3.52593497 | ns |
| LCN15       | -0.03267952 | 0.050378763 | -2.65545832 | 0.007928159 | 0.042244936 | -3.53411285 | ns |
| HPVL        | -0.02398718 | -0.04548448 | -2.65472831 | 0.007945347 | 0.042259404 | -3.53551025 | ns |
| HSPB1       | -0.04055764 | -0.14338851 | -2.65081143 | 0.008038267 | 0.042675888 | -3.53214072 | ns |
| LYN         | -0.05041764 | -0.06077442 | -2.64992432 | 0.00805926  | 0.042701204 | -3.54128058 | ns |
| TGFB1       | -0.02217923 | -0.01279642 | -2.64912297 | 0.008078275 | 0.042701204 | -3.55012955 | ns |

|             |             |             |             |             |             |             |    |
|-------------|-------------|-------------|-------------|-------------|-------------|-------------|----|
| IL12A_IL12B | -0.04439837 | -0.00296878 | -2.64876658 | 0.008086906 | 0.042701204 | -3.54432282 | ns |
| PGLYRP2     | -0.01649809 | -0.03856765 | -2.64639688 | 0.008143772 | 0.042821253 | -3.5495722  | ns |
| LRIG3       | -0.01497255 | 0.005890878 | -2.64639407 | 0.008144    | 0.042821253 | -3.54076091 | ns |
| IL12B       | -0.03141054 | -0.02336091 | -2.64598143 | 0.008153636 | 0.042821253 | -3.55900235 | ns |
| NXPH3       | -0.01652886 | 0.00862956  | -2.6445113  | 0.008189396 | 0.042925208 | -3.547465   | ns |
| TSC22D1     | -0.03650478 | 0.051698312 | -2.6439452  | 0.008202831 | 0.042925208 | -3.5643743  | ns |
| CA4         | -0.01359027 | -0.00525554 | -2.64233054 | 0.008242032 | 0.042998149 | -3.56816244 | ns |
| F7          | -0.01767765 | -0.03198176 | -2.64175855 | 0.008256061 | 0.042998149 | -3.56339043 | ns |
| MFAP5       | -0.02395382 | -0.03717505 | -2.64155384 | 0.008260946 | 0.042998149 | -3.57019795 | ns |
| LGALS8      | -0.03566587 | 0.045095938 | -2.64077427 | 0.00827997  | 0.043020486 | -3.57269292 | ns |
| LCN2        | -0.02122251 | -0.01664785 | -2.63831161 | 0.008340745 | 0.04325928  | -3.55559549 | ns |
| CLEC1B      | -0.05601119 | -0.0024357  | -2.63737991 | 0.008363255 | 0.043261662 | -3.58157901 | ns |
| SAMD9L      | -0.04272249 | 0.019324208 | -2.63707604 | 0.008370835 | 0.043261662 | -3.57757445 | ns |
| TARBP2      | -0.04663921 | 0.019241948 | -2.63332393 | 0.008463999 | 0.04366586  | -3.57887489 | ns |
| ACP1        | 0.024273726 | 0.062168837 | 2.632089312 | 0.008494824 | 0.04372922  | -3.57996625 | ns |
| TNFSF8      | -0.01900303 | -0.00572543 | -2.63162309 | 0.008506232 | 0.04372922  | -3.59519612 | ns |
| CCDC80      | -0.01962514 | -0.03987433 | -2.62965908 | 0.0085556   | 0.043789513 | -3.5947681  | ns |
| CD101       | -0.02321588 | -0.06271614 | -2.62908788 | 0.008569892 | 0.043789513 | -3.60124356 | ns |
| DLK1        | -0.03163294 | -0.01779627 | -2.62888957 | 0.008574863 | 0.043789513 | -3.6033031  | ns |
| LBR         | -0.03987059 | 0.035417087 | -2.62876735 | 0.008577946 | 0.043789513 | -3.6040746  | ns |
| PMVK        | -0.06401961 | -0.30859416 | -2.62735671 | 0.008613842 | 0.043896018 | -3.59301286 | ns |
| ACOT13      | -0.06060323 | -0.05739855 | -2.62160197 | 0.008760327 | 0.044518551 | -3.62073839 | ns |
| RAB27B      | -0.04421823 | -0.14291056 | -2.6213614  | 0.008766495 | 0.044518551 | -3.62246737 | ns |
| PTH         | -0.04288638 | -0.00385061 | -2.61911698 | 0.008824572 | 0.044670662 | -3.61566432 | ns |
| CSDE1       | -0.0650052  | 0.236191659 | -2.61902324 | 0.008827045 | 0.044670662 | -3.61450545 | ns |
| PLSCR3      | -0.03229731 | 0.021866194 | -2.61682758 | 0.008883743 | 0.044870725 | -3.63347096 | ns |
| ADAM22      | -0.01945575 | -0.00237658 | -2.61573126 | 0.008912419 | 0.044870725 | -3.63024173 | ns |
| PTPRH       | -0.02564    | 0.034601966 | -2.61571712 | 0.008912678 | 0.044870725 | -3.63602475 | ns |
| ITGB1BP2    | -0.06401733 | -0.09242788 | -2.61500908 | 0.008931395 | 0.044887562 | -3.62657087 | ns |
| PRTFDC1     | -0.06492907 | -0.15489868 | -2.61097466 | 0.0090374   | 0.045342282 | -3.63699466 | ns |
| CXCL6       | -0.04397046 | -0.01521787 | -2.60968676 | 0.009071208 | 0.04543384  | -3.65361376 | ns |
| FUOM        | -0.0343902  | -0.00858004 | -2.60556382 | 0.00918129  | 0.045899373 | -3.65109033 | ns |
| CLC         | -0.03793464 | 0.045408347 | -2.6050267  | 0.009195594 | 0.045899373 | -3.658715   | ns |
| THBD        | -0.01547751 | -0.01595167 | -2.60414678 | 0.009219226 | 0.045938805 | -3.66098819 | ns |
| HDGFL2      | -0.0344504  | 0.024071242 | -2.60280598 | 0.00925523  | 0.045961567 | -3.67049362 | ns |
| MAVS        | -0.05396981 | 0.080756009 | -2.60281427 | 0.009255274 | 0.045961567 | -3.6572511  | ns |
| CXCL9       | -0.03747535 | 0.030408137 | -2.59905386 | 0.009357014 | 0.046332682 | -3.67744676 | ns |
| CCL16       | -0.02987649 | -0.12633205 | -2.59824948 | 0.009378898 | 0.046332682 | -3.68274064 | ns |
| AXIN1       | -0.0549955  | -0.02693033 | -2.59792363 | 0.009387896 | 0.046332682 | -3.67922587 | ns |
| TIMM8A      | -0.046485   | 0.032083689 | -2.5977162  | 0.009393475 | 0.046332682 | -3.68362213 | ns |
| DAPP1       | -0.06967013 | -0.27996901 | -2.59555852 | 0.009452725 | 0.046546303 | -3.68531775 | ns |
| CD164       | -0.01579279 | 0.011745166 | -2.59359443 | 0.009506851 | 0.046677391 | -3.6907372  | ns |
| CRYBB1      | -0.03475366 | 0.013665339 | -2.59315649 | 0.009518891 | 0.046677391 | -3.69541449 | ns |
| PMM2        | -0.03182921 | 0.041929373 | -2.59257994 | 0.009535126 | 0.046677391 | -3.68284159 | ns |
| GABARAP     | -0.02520487 | 0.031043897 | -2.5920355  | 0.009549973 | 0.046677391 | -3.69735472 | ns |
| LONP1       | -0.04581813 | 0.009066422 | -2.59170841 | 0.009559274 | 0.046677391 | -3.68587946 | ns |
| SAFB2       | -0.01489598 | 0.00595971  | -2.58563137 | 0.009729108 | 0.047427372 | -3.71563037 | ns |
| SUSD1       | -0.02758775 | -0.0524417  | -2.58118577 | 0.009855521 | 0.047963535 | -3.71372311 | ns |
| PLB1        | 0.031512412 | -0.00954359 | 2.577837817 | 0.009951212 | 0.048348649 | -3.73465028 | ns |
| UBE2L6      | -0.03285998 | 0.006833735 | -2.57680109 | 0.0099811   | 0.048390167 | -3.73735373 | ns |
| CIRBP       | -0.05073709 | -0.07475311 | -2.57638369 | 0.009993168 | 0.048390167 | -3.737315   | ns |
| METAP1D     | -0.04639201 | -0.01158085 | -2.57582222 | 0.010009473 | 0.048390167 | -3.73593695 | ns |
| ANGPTL3     | -0.01978612 | 0.002493272 | -2.57482727 | 0.010038329 | 0.048449458 | -3.73606346 | ns |
| GPD1        | -0.02920046 | 0.002666076 | -2.57300775 | 0.010091139 | 0.048602308 | -3.74609939 | ns |
| EIF4G1      | -0.05718535 | -0.09664997 | -2.57202661 | 0.010119721 | 0.048602308 | -3.75040444 | ns |
| MOCS2       | -0.03536822 | 0.023097775 | -2.57154519 | 0.010134031 | 0.048602308 | -3.73842445 | ns |
| GIPC2       | -0.01525669 | -0.00497731 | -2.57138862 | 0.010138396 | 0.048602308 | -3.75112134 | ns |
| LAT         | -0.04355193 | -0.11615883 | -2.57074961 | 0.010157093 | 0.048602308 | -3.75366184 | ns |
| FTCD        | -0.0457435  | 0.059164144 | -2.57031549 | 0.010169866 | 0.048602308 | -3.75257334 | ns |
| EIF2AK2     | -0.05766888 | 0.030491877 | -2.56831553 | 0.010228742 | 0.048787695 | -3.75612438 | ns |
| TLR2        | -0.01224891 | -0.00580661 | -2.56786679 | 0.010242074 | 0.048787695 | -3.75263061 | ns |
| ATP5IF1     | -0.06249263 | -0.08554101 | -2.56701019 | 0.010267309 | 0.048828243 | -3.75954887 | ns |
| SIGLEC8     | -0.02362529 | -0.03199942 | -2.56304491 | 0.010385477 | 0.049309908 | -3.75914693 | ns |
| FIGF        | 0.042361508 | 0.183344146 | 2.562223328 | 0.010410103 | 0.049346594 | -3.758818   | ns |
| PLIN1       | -0.02054988 | 0.007576662 | -2.5612387  | 0.010439614 | 0.049385973 | -3.76455791 | ns |
| AGXT        | -0.04344577 | 0.063705728 | -2.56062394 | 0.010457943 | 0.049385973 | -3.77246789 | ns |

|          |             |             |             |             |             |             |    |
|----------|-------------|-------------|-------------|-------------|-------------|-------------|----|
| GRP      | -0.02761391 | -0.0078918  | -2.56025644 | 0.01046915  | 0.049385973 | -3.76623115 | ns |
| MASP1    | -0.01310156 | -0.01695541 | -2.5595509  | 0.010490317 | 0.049406007 | -3.77319639 | ns |
| JAM3     | -0.02587427 | 0.039494943 | -2.55635672 | 0.01058713  | 0.049781675 | -3.77704667 | ns |
| APOA1    | 0.014229547 | 0.031703827 | 2.552670292 | 0.010699566 | 0.050229473 | -3.79845313 | ns |
| MCFD2    | -0.0245519  | 0.003837824 | -2.55070645 | 0.01076014  | 0.05043276  | -3.79702088 | ns |
| SPTLC1   | -0.01948678 | 0.044138998 | -2.54764187 | 0.010854944 | 0.05079557  | -3.81141447 | ns |
| CD70     | -0.02419691 | -0.03548506 | -2.54555199 | 0.010920208 | 0.051019211 | -3.81282325 | ns |
| MANF     | -0.06776578 | -0.25297915 | -2.54472895 | 0.010945922 | 0.051033105 | -3.81603791 | ns |
| CCL23    | -0.02293171 | -0.02345672 | -2.54403726 | 0.010967613 | 0.051033105 | -3.81778367 | ns |
| CRISP3   | 0.014085094 | 0.008000267 | 2.543784004 | 0.010975613 | 0.051033105 | -3.81585977 | ns |
| ITGA11   | 0.018996313 | 0.015084387 | 2.543073476 | 0.010997944 | 0.051055637 | -3.81907845 | ns |
| FURIN    | -0.02039786 | -0.04240017 | -2.53937573 | 0.011114775 | 0.051441096 | -3.83008565 | ns |
| MAMDC2   | -0.01713792 | -0.00412573 | -2.53932954 | 0.011116209 | 0.051441096 | -3.8324404  | ns |
| SNX5     | -0.01539221 | 0.045764639 | -2.53744506 | 0.011176475 | 0.05156188  | -3.82389509 | ns |
| IKBKG    | -0.05130589 | -0.00835634 | -2.53740354 | 0.011177627 | 0.05156188  | -3.83336516 | ns |
| PALM3    | -0.0394031  | 0.152686517 | -2.53195921 | 0.011352815 | 0.052287412 | -3.836886   | ns |
| BAX      | -0.04953215 | 0.023373501 | -2.53139851 | 0.011370966 | 0.052288534 | -3.83925821 | ns |
| IRAG2    | -0.04933935 | 0.145537998 | -2.53029978 | 0.011406609 | 0.052323194 | -3.84270501 | ns |
| NOS3     | -0.0289273  | -0.03188146 | -2.52952271 | 0.011431886 | 0.052323194 | -3.84462346 | ns |
| SKAP2    | -0.05872158 | -0.01939159 | -2.52950425 | 0.01143226  | 0.052323194 | -3.85435372 | ns |
| ARG1     | 0.02953211  | 0.014040779 | 2.52579834  | 0.011553577 | 0.05279569  | -3.86083069 | ns |
| APOA4    | -0.01793385 | 0.017433054 | -2.51792433 | 0.011814864 | 0.053905315 | -3.88583892 | ns |
| SRC      | -0.06729486 | -0.05705954 | -2.51707297 | 0.011843498 | 0.053951658 | -3.88498753 | ns |
| ST6GAL1  | -0.01600018 | -0.02674019 | -2.51562302 | 0.011892238 | 0.054089306 | -3.89232018 | ns |
| BNIP2    | -0.01758294 | 0.009900216 | -2.51380456 | 0.011953719 | 0.054284385 | -3.89641495 | ns |
| CDH17    | -0.03751503 | 0.068689641 | -2.51203117 | 0.012014051 | 0.054473649 | -3.89471574 | ns |
| ALPP     | -0.06185827 | -0.01356746 | -2.51082713 | 0.012055094 | 0.054574998 | -3.89728538 | ns |
| BRAP     | -0.05646525 | -0.07880488 | -2.50938126 | 0.01210452  | 0.054713928 | -3.9018532  | ns |
| RGMA     | -0.01694251 | 0.024678316 | -2.50707266 | 0.012183712 | 0.05494212  | -3.91407659 | ns |
| ECHS1    | -0.04929098 | -0.02536621 | -2.50680229 | 0.012193319 | 0.05494212  | -3.90054411 | ns |
| SERPINB6 | -0.0332236  | 0.008138884 | -2.50626961 | 0.012211451 | 0.05494212  | -3.91440852 | ns |
| DLG4     | -0.03702984 | 0.079126732 | -2.50409082 | 0.012286843 | 0.055196277 | -3.92053835 | ns |
| IL12RB1  | -0.02008735 | -0.02995799 | -2.50228163 | 0.012350056 | 0.055395027 | -3.9126072  | ns |
| GCHFR    | -0.02662146 | 0.002623943 | -2.50173928 | 0.012369214 | 0.055395865 | -3.90266683 | ns |
| DYNLT3   | -0.02241746 | 0.022529993 | -2.50115091 | 0.012389308 | 0.055400886 | -3.92694354 | ns |
| EIF2S2   | -0.02173739 | 0.058394612 | -2.49874404 | 0.012473985 | 0.055694245 | -3.9205463  | ns |
| PKD2     | -0.03067995 | 0.05123548  | -2.49808475 | 0.012497231 | 0.055702634 | -3.92137908 | ns |
| CDSN     | -0.02319409 | -0.00954196 | -2.49759955 | 0.012514016 | 0.055702634 | -3.9369016  | ns |
| PTPN6    | -0.04926914 | -0.16876903 | -2.4958709  | 0.012575221 | 0.055889871 | -3.93706423 | ns |
| AZI2     | -0.02887905 | 0.067031324 | -2.49416257 | 0.012635789 | 0.056073716 | -3.9460952  | ns |
| DTNB     | -0.02213839 | -0.00528024 | -2.49242046 | 0.012697992 | 0.056264243 | -3.94727737 | ns |
| C3       | -0.02457475 | -0.00887647 | -2.48906366 | 0.012819022 | 0.056586403 | -3.92978881 | ns |
| MTUS1    | -0.02812731 | 0.001213783 | -2.48881599 | 0.012827499 | 0.056586403 | -3.95087312 | ns |
| MOG      | -0.01780278 | 0.006724024 | -2.48877416 | 0.012828835 | 0.056586403 | -3.96003302 | ns |
| SIT1     | -0.03073418 | -0.022559   | -2.48670631 | 0.012903894 | 0.056743195 | -3.95114102 | ns |
| ITGAV    | 0.008805179 | -0.00060153 | 2.486582641 | 0.012908092 | 0.056743195 | -3.9654414  | ns |
| MRPL58   | -0.03729019 | 0.125381575 | -2.48618052 | 0.012922268 | 0.056743195 | -3.96581336 | ns |
| CNPY4    | -0.04168186 | -0.02078161 | -2.48541077 | 0.012950802 | 0.056781294 | -3.96026398 | ns |
| MAP2     | -0.02313945 | 0.062906109 | -2.47945739 | 0.013168793 | 0.057650488 | -3.98142878 | ns |
| PRG3     | -0.02495438 | 0.011750375 | -2.4767153  | 0.013270362 | 0.05800817  | -3.98768365 | ns |
| NEFL     | -0.02235995 | -0.03065688 | -2.47443213 | 0.01335578  | 0.058294286 | -3.97975063 | ns |
| CACNB3   | -0.04269223 | -0.01162826 | -2.47372237 | 0.013381972 | 0.058321431 | -3.99646268 | ns |
| SLIT2    | -0.02824827 | -0.00611232 | -2.47211356 | 0.013442645 | 0.058498545 | -3.98701508 | ns |
| PRKAB1   | -0.0295686  | 0.058418285 | -2.47141972 | 0.01346872  | 0.058524795 | -3.98872674 | ns |
| CCL25    | -0.0267963  | -0.04666595 | -2.46922111 | 0.013551428 | 0.058796685 | -4.00746922 | ns |
| DOK2     | -0.06675405 | -0.04117119 | -2.46802318 | 0.013597002 | 0.058906892 | -4.00341001 | ns |
| LRRC25   | -0.02104003 | -0.0111443  | -2.46548927 | 0.013693521 | 0.059237159 | -4.00917942 | ns |
| TRDMT1   | -0.04302297 | 0.072068488 | -2.4644595  | 0.013732939 | 0.059319795 | -4.01070595 | ns |
| TPK1     | -0.01354357 | -0.00937659 | -2.4630469  | 0.013786986 | 0.059465285 | -4.02171249 | ns |
| GP2      | 0.046196056 | 0.113621163 | 2.462054822 | 0.013825627 | 0.059478184 | -4.00544385 | ns |
| IL17RA   | -0.02410745 | -0.04241618 | -2.46191302 | 0.013830715 | 0.059478184 | -4.02091165 | ns |
| RAB10    | -0.02709258 | 0.033676488 | -2.45966784 | 0.013917411 | 0.059763002 | -4.02996318 | ns |
| BIRC2    | -0.03491719 | 0.039239979 | -2.45818609 | 0.013975269 | 0.059923328 | -4.02022016 | ns |
| VPS53    | -0.04259111 | 0.062721379 | -2.45634442 | 0.014046887 | 0.060142095 | -4.03150206 | ns |
| KLK13    | -0.02339833 | -0.01980778 | -2.4524334  | 0.014200692 | 0.060711598 | -4.03176599 | ns |
| SCARF2   | -0.01487999 | -0.01020922 | -2.45109955 | 0.014253015 | 0.060846203 | -4.05173259 | ns |

|           |              |             |             |             |             |             |    |
|-----------|--------------|-------------|-------------|-------------|-------------|-------------|----|
| CTRB1     | -0.02884421  | 0.01138384  | -2.44667934 | 0.014429028 | 0.06150768  | -4.05799905 | ns |
| EPS8L2    | -0.01582938  | -0.01011755 | -2.44497808 | 0.014497158 | 0.061708019 | -4.06612773 | ns |
| SPRR3     | -0.03317118  | 0.035261931 | -2.44352968 | 0.014555449 | 0.061791873 | -4.06915878 | ns |
| KIR2DS4   | -0.08609234  | 0.940693841 | -2.44343778 | 0.014559181 | 0.061791873 | -4.06832291 | ns |
| NCR3LG1   | -0.01575107  | -0.00379248 | -2.43159247 | 0.015043889 | 0.063756395 | -4.09696529 | ns |
| CD7       | -0.02109842  | -0.00790243 | -2.42499354 | 0.015320383 | 0.064834085 | -4.09838675 | ns |
| APOBR     | -0.02118248  | -0.06262169 | -2.42340596 | 0.015387425 | 0.064967099 | -4.10443727 | ns |
| SNAP23    | -0.04686988  | -0.11194088 | -2.42296026 | 0.015406133 | 0.064967099 | -4.1127207  | ns |
| ABL1      | -0.0371151   | 0.054459085 | -2.42266736 | 0.015418562 | 0.064967099 | -4.1129933  | ns |
| PRELP     | -0.01188614  | -0.02761078 | -2.42133485 | 0.015475161 | 0.065111627 | -4.11657692 | ns |
| PPP3R1    | -0.0223507   | -0.02268153 | -2.41999418 | 0.015532351 | 0.065258225 | -4.11908092 | ns |
| ANXA11    | -0.03571244  | -0.13165385 | -2.41931389 | 0.015561366 | 0.065286191 | -4.12367682 | ns |
| DBNL      | -0.04980151  | -0.04412986 | -2.41683062 | 0.015667835 | 0.065567333 | -4.13077647 | ns |
| LYPD8     | -0.02637364  | -0.00238495 | -2.41642951 | 0.015685387 | 0.065567333 | -4.12115923 | ns |
| GADD45B   | -0.02474964  | 0.073312096 | -2.4161851  | 0.015695742 | 0.065567333 | -4.12755668 | ns |
| IGSF9     | -0.04359217  | -0.0458287  | -2.41557722 | 0.015721789 | 0.065582322 | -4.13658256 | ns |
| CDKN2D    | -0.05049403  | -0.14583199 | -2.41477907 | 0.01575641  | 0.065632976 | -4.13191877 | ns |
| DNAJC21   | -0.01936726  | 0.045629235 | -2.41417219 | 0.015782517 | 0.065648078 | -4.13989535 | ns |
| LIPF      | 0.029015053  | 0.015005395 | 2.412346442 | 0.015862073 | 0.06588514  | -4.13095874 | ns |
| QDPR      | -0.02297143  | -0.01044036 | -2.4083063  | 0.016038534 | 0.066458756 | -4.14523267 | ns |
| NFKBIE    | -0.02643716  | 0.023023827 | -2.40814664 | 0.016045693 | 0.066458756 | -4.14097622 | ns |
| USP28     | 0.018426382  | 0.036867591 | 2.407487795 | 0.016074309 | 0.066482978 | -4.15588193 | ns |
| PRSS2     | -0.02685719  | 0.007863912 | -2.40687008 | 0.016101624 | 0.066501756 | -4.15266215 | ns |
| LRPAP1    | -0.03047241  | 0.08690824  | -2.40105447 | 0.016359603 | 0.06747181  | -4.17217998 | ns |
| ATOX1     | -0.03813824  | -0.06073943 | -2.40009323 | 0.016402665 | 0.067488734 | -4.17131729 | ns |
| ERBB2     | -0.01286037  | -0.025448   | -2.39961558 | 0.016424073 | 0.067488734 | -4.17245441 | ns |
| DPT       | -0.011459934 | -0.06173397 | -2.39940488 | 0.016433468 | 0.067488734 | -4.175651   | ns |
| LYVE1     | -0.00944962  | 0.000175936 | -2.39889978 | 0.016456157 | 0.067488734 | -4.17611392 | ns |
| PHYKPL    | -0.02055893  | -0.02113701 | -2.39483097 | 0.016640104 | 0.068147411 | -4.17364175 | ns |
| CDC42BPB  | -0.0514325   | 0.060279564 | -2.39426116 | 0.016665721 | 0.068156731 | -4.18632383 | ns |
| ITGB1BP1  | -0.02138643  | -0.01081812 | -2.39023235 | 0.016849946 | 0.068813764 | -4.18360407 | ns |
| TYMP      | -0.03495877  | -0.02481184 | -2.38801988 | 0.016951559 | 0.069132057 | -4.19348054 | ns |
| VASN      | -0.01433321  | -0.01119955 | -2.38714037 | 0.01699234  | 0.069201718 | -4.18719097 | ns |
| CEP20     | -0.0386818   | 0.010310323 | -2.38561019 | 0.017063114 | 0.069393164 | -4.19455109 | ns |
| CSTB      | -0.02271343  | -0.05140729 | -2.38432185 | 0.01712287  | 0.069445702 | -4.1994857  | ns |
| OPHN1     | -0.0537228   | -0.01509244 | -2.3843001  | 0.017123598 | 0.069445702 | -4.21099492 | ns |
| NCK2      | -0.05546693  | -0.03250535 | -2.37561014 | 0.017532116 | 0.071003853 | -4.22875896 | ns |
| CLEC4D    | -0.0321589   | -0.05301058 | -2.37498087 | 0.017562078 | 0.071026687 | -4.22909652 | ns |
| CKB       | -0.03105151  | 0.014531382 | -2.3710982  | 0.017747486 | 0.071677259 | -4.24164728 | ns |
| PIIB      | -0.04972838  | -0.09391115 | -2.37017591 | 0.017791947 | 0.071716862 | -4.23876178 | ns |
| WWP2      | -0.0285324   | 0.033169945 | -2.36987589 | 0.017806413 | 0.071716862 | -4.23814161 | ns |
| CAPS      | -0.04529717  | 0.183919936 | -2.36673001 | 0.017958239 | 0.072228728 | -4.25240094 | ns |
| KLRK1     | -0.02181494  | -0.05432116 | -2.36367588 | 0.018106901 | 0.072726478 | -4.25956713 | ns |
| ERC2      | 0.035717625  | 0.145471502 | 2.361050615 | 0.018235861 | 0.072954657 | -4.25299759 | ns |
| YARS1     | -0.07124472  | -0.18103958 | -2.36103653 | 0.018236269 | 0.072954657 | -4.26469051 | ns |
| CD99      | -0.0098226   | -0.0158305  | -2.36098935 | 0.018238664 | 0.072954657 | -4.26233102 | ns |
| DNMBP     | -0.032789    | 0.06235885  | -2.35881764 | 0.018345786 | 0.073282757 | -4.26407625 | ns |
| CRELD1    | -0.01829526  | -0.04364029 | -2.35636871 | 0.018467255 | 0.073667192 | -4.26426686 | ns |
| ENTPD6    | -0.01455412  | -0.04582874 | -2.35513801 | 0.018528578 | 0.073735207 | -4.26707274 | ns |
| CHP1      | -0.0359119   | 0.05134312  | -2.35501282 | 0.018534809 | 0.073735207 | -4.26743359 | ns |
| NFU1      | -0.04923953  | -0.04513239 | -2.35433439 | 0.018568345 | 0.0737639   | -4.28036617 | ns |
| DIABLO    | -0.05699398  | -0.02743327 | -2.35385366 | 0.018592545 | 0.0737639   | -4.27439604 | ns |
| FOXJ3     | -0.02144174  | 0.039407395 | -2.35137934 | 0.018716789 | 0.074156072 | -4.27365659 | ns |
| MATN3     | 0.016227875  | 0.008724201 | 2.348155527 | 0.018879352 | 0.074698791 | -4.287975   | ns |
| FCRL5     | -0.02949494  | -0.05477698 | -2.34380049 | 0.019101049 | 0.075326861 | -4.30244226 | ns |
| BPIFB1    | -0.03347264  | -0.01802848 | -2.34354122 | 0.019114421 | 0.075326861 | -4.2987758  | ns |
| PXN       | -0.0276231   | -0.0001078  | -2.34350474 | 0.019116447 | 0.075326861 | -4.29414855 | ns |
| COMT      | -0.04335582  | -0.0497991  | -2.34288535 | 0.019148314 | 0.075326861 | -4.29197074 | ns |
| SERPINB8  | -0.02903305  | -0.01466746 | -2.34251005 | 0.019167075 | 0.075326861 | -4.30989579 | ns |
| NEXN      | -0.03349127  | 0.069892856 | -2.34053381 | 0.019268824 | 0.075624539 | -4.31248352 | ns |
| ADAM23    | -0.01787243  | -0.03862747 | -2.34003325 | 0.019294617 | 0.075624539 | -4.31564868 | ns |
| EHBP1     | -0.03649621  | 0.041242695 | -2.33907055 | 0.019344427 | 0.075718131 | -4.3170169  | ns |
| FGD3      | -0.0387081   | 0.024898097 | -2.3382437  | 0.019387238 | 0.075743764 | -4.31983113 | ns |
| RAB11FIP3 | -0.05227551  | -0.04093516 | -2.33794323 | 0.019402855 | 0.075743764 | -4.31963221 | ns |
| EXTL1     | -0.02322532  | 0.074238247 | -2.33642735 | 0.019482049 | 0.075951378 | -4.30893922 | ns |
| ITIH3     | -0.01964105  | -0.04103274 | -2.33537212 | 0.019536802 | 0.076018906 | -4.32083084 | ns |

|              |             |              |             |             |             |             |    |
|--------------|-------------|--------------|-------------|-------------|-------------|-------------|----|
| ITGA5        | -0.01287706 | -0.02706417  | -2.33509161 | 0.019551438 | 0.076018906 | -4.32265317 | ns |
| KITLG        | -0.01869074 | -0.01029371  | -2.33206252 | 0.019710302 | 0.076502237 | -4.32708983 | ns |
| STX8         | -0.02515698 | 0.031013476  | -2.33172294 | 0.019728145 | 0.076502237 | -4.33008188 | ns |
| ZBP1         | -0.01910346 | 0.042093612  | -2.3305054  | 0.019792613 | 0.076587687 | -4.322121   | ns |
| MED18        | -0.03940475 | -0.01869304  | -2.33031547 | 0.019802638 | 0.076587687 | -4.32386808 | ns |
| DRAXIN       | -0.02161627 | 0.000665371  | -2.32873171 | 0.019886265 | 0.076809384 | -4.33402253 | ns |
| COMMD1       | -0.02963623 | 0.020862042  | -2.3275736  | 0.019947922 | 0.07691981  | -4.33022399 | ns |
| GCC1         | -0.05204427 | -0.0693852   | -2.32719804 | 0.01996754  | 0.07691981  | -4.34444381 | ns |
| NMI          | -0.03428628 | 0.040922428  | -2.32623685 | 0.020018842 | 0.077015834 | -4.34345512 | ns |
| SPACA5_SPAC  | -0.0137824  | 0.002076908  | -2.32361284 | 0.020159101 | 0.077453389 | -4.35366434 | ns |
| REEP4        | -0.03035195 | 0.104006957  | -2.32005422 | 0.020350845 | 0.078082674 | -4.36186138 | ns |
| LGALS7_LGALS | -0.02080527 | -0.00016966  | -2.31958585 | 0.020376369 | 0.078082674 | -4.35649513 | ns |
| SLAMF1       | -0.03015869 | -0.07847509  | -2.31506337 | 0.020622798 | 0.078923421 | -4.35986765 | ns |
| DKKL1        | 0.04426574  | -0.12792802  | 2.312797403 | 0.020746981 | 0.07926406  | -4.37103877 | ns |
| LDLR         | -0.02831901 | -0.04661866  | -2.31217728 | 0.020781026 | 0.07926406  | -4.37664927 | ns |
| PAM          | -0.01412385 | -0.0376591   | -2.31195545 | 0.020793243 | 0.07926406  | -4.37709801 | ns |
| APOC1        | 0.017412116 | 0.016069799  | 2.311022095 | 0.020844725 | 0.079356712 | -4.37985271 | ns |
| LMNB1        | -0.02808283 | -0.01662526  | -2.31022401 | 0.020888887 | 0.07942129  | -4.38104484 | ns |
| ACAA1        | -0.0414979  | 0.00510804   | -2.3092002  | 0.020945956 | 0.079534708 | -4.37245054 | ns |
| BST2         | -0.02551544 | 0.015131446  | -2.3085644  | 0.020980852 | 0.079563749 | -4.3882487  | ns |
| CYB5R2       | -0.02609497 | 0.014019797  | -2.30579096 | 0.021135629 | 0.079940217 | -4.38667945 | ns |
| HPCAL1       | -0.03761133 | -0.10820676  | -2.30507241 | 0.021175636 | 0.079940217 | -4.39620371 | ns |
| PON1         | 0.012065661 | -0.00682404  | 2.305008338 | 0.02117927  | 0.079940217 | -4.39434452 | ns |
| NCR1         | -0.01788619 | 0.008840206  | -2.30482545 | 0.021189633 | 0.079940217 | -4.39193861 | ns |
| CBS          | -0.0235271  | 0.053951592  | -2.30391501 | 0.021240946 | 0.080030401 | -4.38456413 | ns |
| MTHFSD       | -0.05319677 | 0.005947298  | -2.30059907 | 0.021427717 | 0.080606383 | -4.39795248 | ns |
| PDGFC        | -0.01460405 | -0.00982866  | -2.30009687 | 0.021456354 | 0.080606383 | -4.39325934 | ns |
| NPY          | -0.03306885 | -0.09276635  | -2.29935594 | 0.021497949 | 0.080606383 | -4.40991404 | ns |
| SLA2         | -0.04917709 | -0.03263214  | -2.29924511 | 0.021504237 | 0.080606383 | -4.40954254 | ns |
| AIDA         | -0.04136461 | 0.179887789  | -2.29464392 | 0.021767179 | 0.081283997 | -4.40632178 | ns |
| DNAJA2       | -0.04193438 | -0.04836276  | -2.29406092 | 0.021800337 | 0.081283997 | -4.41930155 | ns |
| CCDC50       | -0.03633902 | 0.154310522  | -2.29380127 | 0.02181521  | 0.081283997 | -4.42194549 | ns |
| SRPK2        | -0.0420609  | 0.120764505  | -2.29365763 | 0.021823624 | 0.081283997 | -4.41741079 | ns |
| ELAC1        | -0.04024789 | -0.03533095  | -2.29364497 | 0.021824196 | 0.081283997 | -4.42230117 | ns |
| MMP7         | -0.02231399 | -0.07096548  | -2.29269362 | 0.021879379 | 0.081368022 | -4.41022784 | ns |
| GRHPR        | -0.03002489 | -0.00937699  | -2.2920834  | 0.02191418  | 0.081368022 | -4.42495581 | ns |
| MARS1        | -0.04036553 | -0.01219094  | -2.29180897 | 0.021930354 | 0.081368022 | -4.41208226 | ns |
| WASF1        | -0.04735381 | 0.084448294  | -2.29053349 | 0.022004157 | 0.081511593 | -4.4159155  | ns |
| ATXN2L       | -0.02241589 | 0.064236122  | -2.29016884 | 0.022024879 | 0.081511593 | -4.43020508 | ns |
| RNASE10      | -0.02252724 | -0.00605866  | -2.28954727 | 0.022061326 | 0.081543131 | -4.41729385 | ns |
| CES3         | -0.03648547 | 0.105642     | -2.28814991 | 0.022142368 | 0.081739208 | -4.42728376 | ns |
| PILRB        | -0.02869694 | -0.12970868  | -2.28744314 | 0.022183548 | 0.081787827 | -4.42932132 | ns |
| MCTS1        | 0.012041561 | 0.037621962  | 2.285375958 | 0.022304264 | 0.082105265 | -4.43906707 | ns |
| NELL2        | -0.01418363 | 0.012721347  | -2.28453105 | 0.022353866 | 0.082105265 | -4.43928472 | ns |
| LSM1         | -0.02744268 | 0.064676575  | -2.28453445 | 0.022354002 | 0.082105265 | -4.4286424  | ns |
| STK11        | -0.03631356 | -0.00298081  | -2.28305553 | 0.02244096  | 0.082321109 | -4.43287688 | ns |
| PIKFYVE      | -0.02606889 | 0.065213124  | -2.2805889  | 0.022586714 | 0.082751824 | -4.43626437 | ns |
| ARHGEF12     | -0.05230163 | -0.03255201  | -2.27794991 | 0.02274325  | 0.083220916 | -4.45302856 | ns |
| SERPINB1     | -0.04545266 | 0.019040598  | -2.27619545 | 0.022848076 | 0.083403247 | -4.45525518 | ns |
| INPL1        | -0.0491917  | -0.01308788  | -2.27615978 | 0.022850205 | 0.083403247 | -4.45442721 | ns |
| DBN1         | -0.02459325 | 0.046510328  | -2.27473432 | 0.022935891 | 0.08350588  | -4.44949015 | ns |
| ERP29        | -0.05534654 | -0.04564359  | -2.27453034 | 0.02294804  | 0.08350588  | -4.45221617 | ns |
| SHMT1        | -0.04336319 | -0.02802833  | -2.2742592  | 0.022964117 | 0.08350588  | -4.46138194 | ns |
| MTIF3        | -0.04035894 | -0.00924784  | -2.27195726 | 0.023102765 | 0.083905564 | -4.46940094 | ns |
| USP8         | -0.0476259  | 0.046545447  | -2.27050796 | 0.023190836 | 0.084120796 | -4.46121255 | ns |
| MAD1L1       | -0.02442231 | 9.3353285535 | -2.26995507 | 0.023224248 | 0.084137475 | -4.46609164 | ns |
| CMIP         | -0.03873421 | 0.014338264  | -2.26929025 | 0.023264405 | 0.084157502 | -4.47557255 | ns |
| L3HYPDH      | -0.04139657 | 0.011406265  | -2.26891127 | 0.023287418 | 0.084157502 | -4.47738099 | ns |
| GZMH         | 0.036172235 | -0.03104039  | 2.266013525 | 0.023464679 | 0.084693281 | -4.4713242  | ns |
| CTSS         | -0.01234682 | -0.01793221  | -2.26526736 | 0.023514101 | 0.084766824 | -4.36295738 | ns |
| NUDC         | -0.03197031 | -0.0570737   | -2.26472769 | 0.023543115 | 0.084766824 | -4.487658   | ns |
| CEP85        | -0.03174884 | 0.061124103  | -2.26360215 | 0.023612779 | 0.084902936 | -4.47585597 | ns |
| EEF1D        | -0.0434673  | 0.01657469   | -2.2629186  | 0.023654493 | 0.084902936 | -4.4908523  | ns |
| BIN2         | -0.04590434 | 0.032309115  | -2.26269898 | 0.023668147 | 0.084902936 | -4.48774641 | ns |
| PRKG1        | -0.05922813 | -0.03720489  | -2.26197148 | 0.023713278 | 0.084958115 | -4.48047123 | ns |
| CCN4         | -0.01976244 | 0.020350445  | -2.26069573 | 0.023791896 | 0.084958115 | -4.49736394 | ns |

|          |             |             |             |             |             |             |    |
|----------|-------------|-------------|-------------|-------------|-------------|-------------|----|
| TPD52L2  | -0.05022558 | -0.09761639 | -2.260245   | 0.023820188 | 0.084958115 | -4.48434324 | ns |
| CRKL     | -0.05355639 | -0.08170865 | -2.2599453  | 0.023838592 | 0.084958115 | -4.49294284 | ns |
| SETMAR   | -0.01561733 | -0.01864916 | -2.25973484 | 0.023851796 | 0.084958115 | -4.48932161 | ns |
| FLT3LG   | -0.01638668 | -0.01131521 | -2.25962869 | 0.023858101 | 0.084958115 | -4.49910166 | ns |
| COX6B1   | -0.01485888 | 0.015733357 | -2.25884107 | 0.023907119 | 0.085016082 | -4.49999809 | ns |
| MESD     | -0.06070335 | -0.03171814 | -2.25843344 | 0.023932609 | 0.085016082 | -4.49731201 | ns |
| DTD1     | -0.04026016 | 0.014357312 | -2.25367148 | 0.024231081 | 0.085971759 | -4.49905883 | ns |
| TNIP1    | -0.04172642 | 0.017423636 | -2.25096282 | 0.024401845 | 0.086472557 | -4.51756875 | ns |
| CLPP     | -0.04731027 | -0.01695133 | -2.24927055 | 0.02450951  | 0.086748812 | -4.51319374 | ns |
| NARS1    | -0.0219139  | -0.05037414 | -2.24662461 | 0.024678024 | 0.087239504 | -4.52819965 | ns |
| MAP2K6   | -0.05010988 | -0.04439432 | -2.24496438 | 0.024784604 | 0.08751033  | -4.52702822 | ns |
| FCRL6    | -0.03349972 | -0.06208882 | -2.24324771 | 0.024895056 | 0.087794157 | -4.53084986 | ns |
| GLRX5    | -0.04020015 | 0.00724146  | -2.24061629 | 0.025065377 | 0.08828818  | -4.5281574  | ns |
| CD300A   | -0.01344578 | -0.01863664 | -2.23906885 | 0.025165897 | 0.088535444 | -4.53159527 | ns |
| TPSD1    | -0.01682982 | 0.031378876 | -2.23803895 | 0.025232639 | 0.088663424 | -4.54729948 | ns |
| BANK1    | -0.05266446 | -0.09860749 | -2.23679832 | 0.025313831 | 0.08884181  | -4.54518135 | ns |
| METAP2   | -0.02872143 | -0.05762615 | -2.23543866 | 0.025402748 | 0.089046849 | -4.55295678 | ns |
| F9       | -0.00931301 | -0.02595323 | -2.2337806  | 0.025511879 | 0.089322167 | -4.55048935 | ns |
| CASP3    | -0.04320947 | -0.05198916 | -2.23324758 | 0.025546827 | 0.089337408 | -4.55747386 | ns |
| TJAP1    | -0.04114985 | 0.026097169 | -2.23149969 | 0.025662348 | 0.089634038 | -4.55863255 | ns |
| CEACAM5  | -0.03108118 | -0.01066302 | -2.22799843 | 0.025895533 | 0.090240538 | -4.54910473 | ns |
| HHEX     | -0.03559256 | -0.03271949 | -2.22795516 | 0.025897798 | 0.090240538 | -4.56868569 | ns |
| TBCB     | -0.04976689 | -0.11186307 | -2.2274205  | 0.0259337   | 0.09025793  | -4.56296151 | ns |
| DDX58    | -0.02846468 | 0.063343732 | -2.22541262 | 0.026068318 | 0.090618438 | -4.56087487 | ns |
| DOK1     | -0.06236577 | -0.15897007 | -2.22292026 | 0.026235545 | 0.09109131  | -4.57980193 | ns |
| PHACTR2  | -0.05230016 | -0.03393942 | -2.22175599 | 0.026314164 | 0.091255769 | -4.58332211 | ns |
| APOA2    | -0.02181993 | -0.00634954 | -2.22030128 | 0.026412748 | 0.091488998 | -4.5844858  | ns |
| STX3     | -0.01754612 | 0.064155683 | -2.21762397 | 0.026594927 | 0.091902173 | -4.59146812 | ns |
| REN      | -0.03332902 | -0.01075304 | -2.21717388 | 0.026625845 | 0.091902173 | -4.58632014 | ns |
| PRR4     | -0.03194812 | 0.058512286 | -2.21716883 | 0.026626451 | 0.091902173 | -4.57655791 | ns |
| USO1     | -0.04436503 | -0.04736892 | -2.21599047 | 0.026706815 | 0.091975485 | -4.58848749 | ns |
| PRKAR2A  | -0.03766773 | -0.04797224 | -2.21561366 | 0.026732481 | 0.091975485 | -4.59500728 | ns |
| HARS1    | -0.03792808 | -0.01981114 | -2.21540516 | 0.026746869 | 0.091975485 | -4.59279547 | ns |
| MARCO    | -0.0129319  | -0.03160433 | -2.21501521 | 0.026773686 | 0.091975485 | -4.59106564 | ns |
| CELSR2   | -0.01264733 | -0.00448069 | -2.21344512 | 0.02688182  | 0.092082787 | -4.58817723 | ns |
| DRG2     | -0.02783831 | 0.044038546 | -2.21321184 | 0.026897746 | 0.092082787 | -4.59459171 | ns |
| TGFBR1   | -0.00998067 | 0.001379211 | -2.21318974 | 0.026899527 | 0.092082787 | -4.58646667 | ns |
| CD48     | -0.01408086 | -0.02350429 | -2.21167482 | 0.027003786 | 0.092331445 | -4.60063651 | ns |
| ENO1     | -0.03839934 | -0.04632522 | -2.21073987 | 0.027068576 | 0.092438224 | -4.60211776 | ns |
| GSTP1    | -0.03260389 | 0.065066671 | -2.2103149  | 0.027098329 | 0.092438224 | -4.59373589 | ns |
| DSCAM    | -0.01568465 | 0.00866266  | -2.20805379 | 0.027255087 | 0.092864475 | -4.61343167 | ns |
| SCARA5   | -0.01370587 | -0.04072241 | -2.20268596 | 0.027631548 | 0.094037437 | -4.62518324 | ns |
| GOPC     | -0.04932441 | -0.06497915 | -2.20106646 | 0.027746157 | 0.094317552 | -4.62383576 | ns |
| ELOB     | -0.01760001 | 0.021645314 | -2.20042308 | 0.027792046 | 0.094363693 | -4.61493693 | ns |
| DCTD     | -0.04281196 | -0.05431009 | -2.19905493 | 0.027889079 | 0.094583172 | -4.61966806 | ns |
| SCRIB    | -0.04154527 | 0.181398674 | -2.19859226 | 0.027922064 | 0.094585182 | -4.61974191 | ns |
| MAP3K5   | -0.04848576 | 0.119041837 | -2.19698123 | 0.028036983 | 0.094761988 | -4.62323115 | ns |
| BACH1    | -0.03495134 | 0.030804346 | -2.19692561 | 0.028040657 | 0.094761988 | -4.63286892 | ns |
| PLEKHO1  | -0.031728   | 0.046256373 | -2.19649039 | 0.028071616 | 0.094761988 | -4.63774243 | ns |
| SIAE     | -0.02264575 | -0.00954337 | -2.19243827 | 0.028362779 | 0.095634314 | -4.64355066 | ns |
| SH2B3    | -0.04717299 | -0.04187252 | -2.1869188  | 0.028763799 | 0.096874618 | -4.64510828 | ns |
| TK1      | -0.0202899  | 0.034499433 | -2.18565012 | 0.028856352 | 0.097074365 | -4.65372401 | ns |
| PTPRR    | -0.01621054 | 0.016323987 | -2.18423496 | 0.02895992  | 0.097310663 | -4.66437422 | ns |
| MINK1    | -0.04177796 | -0.04931503 | -2.18366718 | 0.029001653 | 0.097338883 | -4.66560441 | ns |
| PRDX5    | -0.03297933 | -0.12997699 | -2.18218098 | 0.02911111  | 0.097558525 | -4.66974793 | ns |
| SIRPA    | -0.02746109 | -0.09106742 | -2.1818746  | 0.029133916 | 0.097558525 | -4.66456801 | ns |
| CD200R1  | -0.01672313 | 0.016221367 | -2.17927601 | 0.029326382 | 0.098090534 | -4.66950861 | ns |
| CCL4     | -0.03179441 | 0.017137481 | -2.17260912 | 0.029824995 | 0.099572041 | -4.68467742 | ns |
| PON2     | -0.01671233 | -0.03382266 | -2.17199821 | 0.029871342 | 0.099572041 | -4.67825114 | ns |
| UFD1     | -0.06252146 | -0.07061145 | -2.17198934 | 0.029871612 | 0.099572041 | -4.68976623 | ns |
| RRAS     | -0.05808956 | 0.130325547 | -2.16913875 | 0.030087687 | 0.100177933 | -4.68415971 | ns |
| GPR15L   | -0.02683306 | -0.06430246 | -2.16615596 | 0.0303145   | 0.100818155 | -4.70231913 | ns |
| CALCOCO2 | -0.03429503 | 0.032612566 | -2.1654573  | 0.03036831  | 0.100882214 | -4.69145605 | ns |
| CEMIP2   | -0.01387887 | 0.00662168  | -2.16279579 | 0.030572601 | 0.101423715 | -4.69583012 | ns |
| ATRN     | -0.00747621 | -0.01673262 | -2.16242369 | 0.030600785 | 0.101423715 | -4.71115855 | ns |
| FYB1     | -0.04440669 | -0.03554146 | -2.16104163 | 0.030707557 | 0.10147355  | -4.70977968 | ns |

|          |             |             |              |             |             |             |    |
|----------|-------------|-------------|--------------|-------------|-------------|-------------|----|
| PAK4     | -0.02905554 | 0.074696987 | -2.16091213  | 0.030717833 | 0.10147355  | -4.70204231 | ns |
| IFNGR2   | -0.02470759 | 0.106773127 | -2.16088044  | 0.030720075 | 0.10147355  | -4.70779015 | ns |
| VEGFA    | -0.02771407 | 0.029447754 | -2.15750984  | 0.03098131  | 0.102220818 | -4.72099033 | ns |
| MYO9B    | -0.03173857 | 0.098124964 | -2.15603219  | 0.031096889 | 0.102370516 | -4.71250162 | ns |
| PAG1     | -0.02623815 | -0.01126442 | -2.15571715  | 0.031121542 | 0.102370516 | -4.71319562 | ns |
| TRIM25   | -0.04847444 | -0.00986909 | -2.15534704  | 0.031150071 | 0.102370516 | -4.72548981 | ns |
| ATP6V1G1 | -0.03233388 | 0.034673694 | -2.1550351   | 0.031174869 | 0.102370516 | -4.71378786 | ns |
| PADI2    | -0.02750839 | 0.060466111 | -2.15468854  | 0.031201972 | 0.102370516 | -4.71537421 | ns |
| PRSS27   | -0.01886519 | 0.003530051 | -2.15310823  | 0.031325811 | 0.102597651 | -4.72312823 | ns |
| TMPRSS5  | -0.01858251 | -0.00588975 | -2.15290972  | 0.031341474 | 0.102597651 | -4.7217566  | ns |
| CEP170   | -0.03461276 | 0.081483561 | -2.1512083   | 0.031475599 | 0.102921333 | -4.72196059 | ns |
| MPIG6B   | -0.03637605 | -0.16822671 | -2.15061942  | 0.031521784 | 0.102957056 | -4.73274704 | ns |
| FOXO1    | -0.04038245 | -0.01779692 | -2.14839383  | 0.031698086 | 0.103303894 | -4.73747261 | ns |
| PPP1R2   | -0.03773159 | -0.00658199 | -2.14838619  | 0.031698729 | 0.103303894 | -4.73526745 | ns |
| UMOD     | 0.025466417 | 0.009973374 | -2.146961771 | 0.031811808 | 0.103556834 | -4.74409753 | ns |
| HLA-A    | -0.01432146 | -0.03275361 | -2.14601663  | 0.031887108 | 0.103686366 | -4.7474244  | ns |
| CRIM1    | -0.00919725 | -0.01135655 | -2.14479994  | 0.031984428 | 0.103887129 | -4.74628131 | ns |
| TRAF2    | -0.03344514 | 0.053272983 | -2.14361002  | 0.032079819 | 0.10408119  | -4.74765703 | ns |
| GGACT    | -0.03122518 | 0.024296281 | -2.14294522  | 0.032133032 | 0.10413813  | -4.75305674 | ns |
| EBAG9    | -0.04496658 | -0.01514031 | -2.1414233   | 0.032255696 | 0.10441977  | -4.74931041 | ns |
| CD63     | -0.02452502 | -0.05073654 | -2.14091892  | 0.032296393 | 0.104435732 | -4.74938193 | ns |
| PI16     | -0.01056616 | 0.005984555 | -2.13957021  | 0.032405108 | 0.104671366 | -4.75908143 | ns |
| FGFBP2   | 0.021831246 | 0.026673303 | 2.137293916  | 0.032589713 | 0.105079841 | -4.76450993 | ns |
| AP1G2    | -0.03563433 | 0.03947534  | -2.13712428  | 0.03260354  | 0.105079841 | -4.7644556  | ns |
| BTN3A2   | -0.01729927 | -0.03912376 | -2.13597486  | 0.032697243 | 0.105265656 | -4.76386479 | ns |
| QSOX1    | -0.01830031 | 0.00675125  | -2.13537528  | 0.032746312 | 0.105307524 | -4.75956897 | ns |
| LGALS3BP | -0.01333588 | 0.011790123 | -2.13485957  | 0.032788126 | 0.105325992 | -4.76991654 | ns |
| VT11A    | -0.02586713 | 0.054787506 | -2.13151876  | 0.03306248  | 0.106090595 | -4.76471874 | ns |
| RBPMS2   | -0.04578539 | 0.010229808 | -2.13059098  | 0.03313899  | 0.106219374 | -4.76574227 | ns |
| BID      | -0.03134886 | 0.014622055 | -2.12815146  | 0.033340418 | 0.106747831 | -4.78041218 | ns |
| SULT1A1  | -0.06092249 | -0.14694227 | -2.12540614  | 0.033568501 | 0.107360375 | -4.79110294 | ns |
| SDCCAG8  | -0.05053106 | -0.01535221 | -2.12340656  | 0.033735646 | 0.107776899 | -4.79344717 | ns |
| CHRD1    | -0.01390491 | -0.02839594 | -2.12015814  | 0.034008675 | 0.108243061 | -4.79727668 | ns |
| MPI      | -0.0405234  | 0.02168952  | -2.1199394   | 0.034027211 | 0.108243061 | -4.79505645 | ns |
| STK4     | -0.04077248 | -0.01258294 | -2.11957107  | 0.034058283 | 0.108243061 | -4.79626725 | ns |
| WFDC12   | -0.02976414 | -0.06381056 | -2.11945914  | 0.034067549 | 0.108243061 | -4.80308179 | ns |
| BAG3     | -0.01898094 | -0.04105563 | -2.1192772   | 0.034083171 | 0.108243061 | -4.79511148 | ns |
| DCTN1    | -0.0308306  | 0.000973225 | -2.11902753  | 0.034103978 | 0.108243061 | -4.80515465 | ns |
| ADGRE2   | -0.01299212 | -0.00303074 | -2.11675528  | 0.034296599 | 0.108736232 | -4.80556443 | ns |
| PCBD1    | -0.02053393 | 0.020059573 | -2.11516312  | 0.034432365 | 0.109048269 | -4.79800629 | ns |
| CMC1     | -0.03918206 | 0.010765939 | -2.11344039  | 0.03457904  | 0.109079928 | -4.81535377 | ns |
| C1RL     | -0.00864263 | -0.02239994 | -2.11319684  | 0.034599903 | 0.109079928 | -4.81464504 | ns |
| C2CD2L   | -0.01986876 | 0.003650349 | -2.11277357  | 0.034636594 | 0.109079928 | -4.8027996  | ns |
| ASPSCR1  | -0.02948065 | 0.002254882 | -2.11221651  | 0.034683811 | 0.109079928 | -4.81882261 | ns |
| TOP2B    | -0.03444157 | 0.014177289 | -2.11204175  | 0.034699316 | 0.109079928 | -4.8034307  | ns |
| C1R      | -0.00837115 | -0.00150595 | -2.11202142  | 0.034700573 | 0.109079928 | -4.81802958 | ns |
| SUGP1    | -0.01778071 | 0.04969054  | -2.11198355  | 0.034703854 | 0.109079928 | -4.81728188 | ns |
| PRTG     | 0.01130056  | 0.009911725 | 2.110634436  | 0.034819699 | 0.109283502 | -4.82276522 | ns |
| PAXX     | -0.01968145 | 0.01019013  | -2.11035069  | 0.034844512 | 0.109283502 | -4.80925173 | ns |
| SYT1     | -0.01700408 | 0.032338692 | -2.10987575  | 0.034885043 | 0.109283502 | -4.82276819 | ns |
| RAB44    | -0.0189474  | 0.038410105 | -2.10949029  | 0.034918324 | 0.109283502 | -4.82266772 | ns |
| GRPEL1   | -0.02760967 | 0.019964552 | -2.10898774  | 0.034961848 | 0.109302564 | -4.81802837 | ns |
| CTF1     | -0.03910543 | 0.019650402 | -2.10600504  | 0.035220414 | 0.109839389 | -4.81826798 | ns |
| NRGN     | -0.03904845 | -0.02731205 | -2.10585476  | 0.035233032 | 0.109839389 | -4.83008433 | ns |
| BCAT1    | -0.01290309 | 0.004959264 | -2.10570078  | 0.035246407 | 0.109839389 | -4.83155242 | ns |
| KIF1C    | -0.01546489 | 0.023050998 | -2.1043526   | 0.035364261 | 0.110071627 | -4.82003742 | ns |
| SPRED2   | -0.01965215 | 0.055718089 | -2.10398496  | 0.035396321 | 0.110071627 | -4.82027657 | ns |
| CWC15    | -0.0271655  | 0.103608748 | -2.10221486  | 0.03555067  | 0.110433995 | -4.83505887 | ns |
| CFB      | -0.01518923 | -0.0487602  | -2.09958266  | 0.035782036 | 0.111034585 | -4.83463132 | ns |
| NIT2     | -0.03218237 | -0.04011081 | -2.09814509  | 0.035908548 | 0.111308873 | -4.84597951 | ns |
| EVI5     | -0.03882456 | -0.00236064 | -2.09492409  | 0.036194431 | 0.112076075 | -4.83914499 | ns |
| SNAPIN   | -0.02494    | 0.020923945 | -2.09369166  | 0.036303638 | 0.112295152 | -4.85747331 | ns |
| CDKN1A   | -0.04959487 | -0.04700679 | -2.09168176  | 0.036483441 | 0.112644709 | -4.85408654 | ns |
| LEP      | -0.04488809 | -0.17409801 | -2.09156595  | 0.036493799 | 0.112644709 | -4.85476354 | ns |
| USP25    | -0.03141306 | 0.006409947 | -2.09095974  | 0.036547969 | 0.112683817 | -4.86127898 | ns |
| GBP4     | -0.02232351 | 0.037923251 | -2.09056656  | 0.03658365  | 0.112683817 | -4.85036868 | ns |

|           |             |             |             |             |             |             |    |
|-----------|-------------|-------------|-------------|-------------|-------------|-------------|----|
| LPP       | -0.02876711 | 0.01550582  | -2.08971977 | 0.036659745 | 0.11278187  | -4.85047409 | ns |
| PCYT2     | -0.03267937 | -0.02545529 | -2.08901666 | 0.036722532 | 0.11278187  | -4.86514307 | ns |
| FCER1A    | -0.01006789 | -0.01828823 | -2.08891795 | 0.036731356 | 0.11278187  | -4.86737814 | ns |
| RBM25     | 0.020008399 | 0.017726948 | 2.086225917 | 0.036974988 | 0.113410678 | -4.85606151 | ns |
| IFIT1     | -0.02240092 | 0.039074776 | -2.08466031 | 0.037116723 | 0.113419665 | -4.86762576 | ns |
| ADGRV1    | 0.029433317 | 0.076882391 | 2.084389542 | 0.037141537 | 0.113419665 | -4.8632599  | ns |
| SNU13     | -0.02783617 | 0.150081495 | -2.0839817  | 0.037178677 | 0.113419665 | -4.8623515  | ns |
| SLAMF8    | -0.02397371 | -0.09001592 | -2.0839231  | 0.037183998 | 0.113419665 | -4.863264   | ns |
| FKBP5     | -0.04385536 | -0.06021899 | -2.08349305 | 0.037222894 | 0.113419665 | -4.87070754 | ns |
| MECR      | -0.03879154 | -0.01244222 | -2.08320812 | 0.037249063 | 0.113419665 | -4.86476459 | ns |
| PTTG1     | -0.01755984 | 0.007710266 | -2.08319758 | 0.037249814 | 0.113419665 | -4.87064962 | ns |
| HSD17B3   | -0.02051613 | 0.038744087 | -2.08033023 | 0.03751215  | 0.114099457 | -4.8698928  | ns |
| LRCH4     | -0.02991693 | 0.028761743 | -2.07960792 | 0.037578416 | 0.114182077 | -4.87138301 | ns |
| SYTL4     | -0.03084533 | 0.093125142 | -2.07790463 | 0.037734575 | 0.114438055 | -4.88923875 | ns |
| MICB_MICA | 0.069511182 | -0.52832135 | 2.077836105 | 0.037741044 | 0.114438055 | -4.88538482 | ns |
| GLA       | -0.01642717 | -0.02396195 | -2.07620104 | 0.037892224 | 0.114753859 | -4.87914603 | ns |
| DCDC2C    | -0.02667983 | 0.044513062 | -2.07586083 | 0.037923792 | 0.114753859 | -4.87745626 | ns |
| RCOR1     | -0.02035049 | 0.070401337 | -2.07413189 | 0.038084007 | 0.11511936  | -4.88434671 | ns |
| GART      | -0.01148548 | 0.018293948 | -2.07210185 | 0.038272415 | 0.115463621 | -4.90208941 | ns |
| SIGLEC6   | -0.01469321 | -0.02438559 | -2.07167412 | 0.038312323 | 0.115463621 | -4.90359792 | ns |
| PEPD      | 0.010992351 | -0.00093538 | 2.070976824 | 0.038377495 | 0.115463621 | -4.90234928 | ns |
| AGER      | -0.01850731 | 0.032440312 | -2.07084574 | 0.038389947 | 0.115463621 | -4.89655608 | ns |
| ASAH1     | -0.0199292  | -0.00626588 | -2.0706811  | 0.038405309 | 0.115463621 | -4.89856827 | ns |
| CORO1A    | -0.04054019 | 0.098387256 | -2.07036649 | 0.038435151 | 0.115463621 | -4.88785084 | ns |
| NAA10     | -0.0215527  | -0.00064846 | -2.06710468 | 0.038741369 | 0.116263923 | -4.89709658 | ns |
| BCAN      | 0.015736805 | 0.042684075 | 2.065089088 | 0.038931411 | 0.11671429  | -4.908578   | ns |
| TBC1D5    | -0.03606317 | 0.097886446 | -2.06312627 | 0.039117417 | 0.117098218 | -4.91559968 | ns |
| VWF       | -0.03374949 | -0.04195729 | -2.06289009 | 0.039139678 | 0.117098218 | -4.92052967 | ns |
| SLITRK2   | -0.0178594  | -0.01402865 | -2.06193239 | 0.039230783 | 0.117250651 | -4.92357429 | ns |
| GP6       | -0.04036778 | -0.0482244  | -2.06074946 | 0.039343777 | 0.117404585 | -4.9198021  | ns |
| FN1       | -0.0113278  | -0.0144894  | -2.06009394 | 0.039406222 | 0.117404585 | -4.92550021 | ns |
| BOC       | -0.01068449 | 0.00589777  | -2.05947953 | 0.039465467 | 0.117404585 | -4.91438576 | ns |
| DDHD2     | -0.02834005 | 0.006013636 | -2.059408   | 0.039471809 | 0.117404585 | -4.92810595 | ns |
| ATG16L1   | -0.03630508 | -0.00849424 | -2.05928841 | 0.039483323 | 0.117404585 | -4.92631775 | ns |
| IRAK4     | -0.04757277 | -0.12338317 | -2.05814648 | 0.039592924 | 0.11761072  | -4.92577984 | ns |
| TBC1D23   | -0.04153747 | 0.017106392 | -2.05691999 | 0.039710839 | 0.117795133 | -4.92561775 | ns |
| SELPLG    | 0.012091551 | -0.01906227 | 2.056661298 | 0.039735687 | 0.117795133 | -4.92881124 | ns |
| CXCL12    | 0.01776468  | 0.002110372 | 2.055532777 | 0.039844724 | 0.117998573 | -4.92242042 | ns |
| RALY      | -0.0207319  | 0.029304294 | -2.05478752 | 0.039916311 | 0.11809808  | -4.93566836 | ns |
| PTPRZ1    | -0.01383658 | 0.020720232 | -2.05353528 | 0.040037445 | 0.118295609 | -4.93918308 | ns |
| HEXIM1    | -0.03733032 | -0.00232697 | -2.0532365  | 0.040066561 | 0.118295609 | -4.93579323 | ns |
| PSTPIP2   | -0.04572357 | -0.0979737  | -2.05130128 | 0.040255429 | 0.118733185 | -4.91437747 | ns |
| PCDH17    | -0.01545043 | 0.01419953  | -2.05072643 | 0.040310583 | 0.118775886 | -4.93867415 | ns |
| LRRFIP1   | -0.02085065 | 0.057675848 | -2.04980796 | 0.040400018 | 0.118919408 | -4.94580739 | ns |
| MFAP3     | -0.02186702 | 0.035822233 | -2.04897156 | 0.04048218  | 0.119041254 | -4.93579727 | ns |
| GASK1A    | -0.01841466 | -0.01555889 | -2.04657351 | 0.040717333 | 0.119612287 | -4.93898385 | ns |
| MTSS1     | -0.04726572 | -0.00883268 | -2.04582238 | 0.04079073  | 0.119707469 | -4.95373973 | ns |
| STAT5B    | -0.06221209 | -0.04174943 | -2.03920869 | 0.041446353 | 0.121509389 | -4.96160256 | ns |
| THOP1     | -0.01404665 | -0.00935662 | -2.03652413 | 0.041715014 | 0.122173008 | -4.96532638 | ns |
| ESM1      | 0.015754775 | 0.024057836 | 2.036034275 | 0.041764075 | 0.122173008 | -4.96840737 | ns |
| SNCG      | -0.03061672 | -0.09860755 | -2.03545716 | 0.041822125 | 0.122173008 | -4.968847   | ns |
| ELN       | -0.0139105  | -0.04060549 | -2.03527628 | 0.041840071 | 0.122173008 | -4.9762185  | ns |
| PHOSPHO1  | -0.0129599  | -0.03324967 | -2.03136924 | 0.042234835 | 0.123186691 | -4.97709317 | ns |
| SLC34A3   | -0.02083756 | 0.03523829  | -2.03100955 | 0.042271597 | 0.123186691 | -4.96880706 | ns |
| ART5      | -0.02587264 | 0.126352444 | -2.02817861 | 0.042559567 | 0.123640335 | -4.97791271 | ns |
| CBLN1     | -0.03987446 | 0.206291956 | -2.02816844 | 0.042560604 | 0.123640335 | -4.97793316 | ns |
| ZFYVE19   | -0.03732655 | -0.00220973 | -2.02805615 | 0.042571627 | 0.123640335 | -4.98964346 | ns |
| TIMM10    | -0.01654906 | 0.043848896 | -2.02763029 | 0.042615082 | 0.123640335 | -4.99162895 | ns |
| GNE       | -0.02923744 | 0.031629852 | -2.02740137 | 0.042638978 | 0.123640335 | -4.97851402 | ns |
| GTPBP2    | -0.03367403 | 0.035633194 | -2.02597594 | 0.04278478  | 0.123940039 | -4.98202352 | ns |
| LILRA5    | -0.01478793 | -0.05301764 | -2.02326717 | 0.04306298  | 0.124622301 | -4.99357762 | ns |
| TPPP3     | -0.01754776 | 0.026668434 | -2.02169909 | 0.043225088 | 0.124967581 | -4.9908263  | ns |
| PPP2R5A   | -0.04885347 | 0.03624698  | -2.0156655  | 0.043852231 | 0.126655305 | -5.01449842 | ns |
| PTN       | -0.0213597  | -0.04440961 | -2.01208205 | 0.044229054 | 0.12761743  | -5.01009832 | ns |
| ABO       | 0.059339376 | -0.17263805 | 2.010182235 | 0.04442922  | 0.128068433 | -5.0254283  | ns |
| AMOTL2    | -0.02020048 | 0.101791668 | -2.00515255 | 0.044964219 | 0.12939587  | -5.03357678 | ns |



|          |             |             |             |             |             |             |    |
|----------|-------------|-------------|-------------|-------------|-------------|-------------|----|
| STX6     | -0.03047981 | 0.130004856 | -2.00465116 | 0.045018241 | 0.12939587  | -5.02400865 | ns |
| CDH6     | -0.01637477 | 0.002957018 | -2.00460684 | 0.045022673 | 0.12939587  | -5.03144522 | ns |
| RHOC     | -0.0522387  | -0.14197442 | -2.0025145  | 0.045247187 | 0.129913262 | -5.03149223 | ns |
| MRPS16   | -0.01207884 | 0.03521769  | -2.001361   | 0.045371439 | 0.130142044 | -5.02922214 | ns |
| FLI1     | -0.04858367 | 0.050508276 | -1.9980025  | 0.045734362 | 0.130854363 | -5.03720739 | ns |
| NEB      | -0.01538692 | 0.034835709 | -1.99789742 | 0.045745768 | 0.130854363 | -5.03662198 | ns |
| CBLIF    | 0.030405999 | 0.023234483 | 1.997721278 | 0.045764577 | 0.130854363 | -5.04452858 | ns |
| GYS1     | -0.04065621 | 0.009472521 | -1.99740619 | 0.045799027 | 0.130854363 | -5.03928259 | ns |
| DNAJB14  | -0.02654991 | 0.022745037 | -1.99484952 | 0.046076816 | 0.131519358 | -5.05591143 | ns |
| FUT8     | -0.02562699 | 0.050723072 | -1.99346723 | 0.046228068 | 0.131822225 | -5.05276029 | ns |
| DDX25    | 0.015334748 | 0.03802396  | 1.991563474 | 0.046436939 | 0.132288647 | -5.05059291 | ns |
| IGHMBP2  | -0.02299228 | 0.082171458 | -1.98976513 | 0.046634901 | 0.132723109 | -5.05270533 | ns |
| CD300LF  | -0.02615323 | -0.16256069 | -1.98926517 | 0.046689466 | 0.132749018 | -5.06961639 | ns |
| SPRY2    | -0.04063804 | 0.051050357 | -1.98774374 | 0.046858062 | 0.132984757 | -5.05836044 | ns |
| CNGB3    | -0.02268624 | 0.079514158 | -1.98769523 | 0.046863464 | 0.132984757 | -5.0585458  | ns |
| ADAMTS15 | -0.02008785 | -0.04762613 | -1.98635285 | 0.047011971 | 0.133276656 | -5.06714294 | ns |
| CALB1    | -0.01843727 | -0.01608964 | -1.98419292 | 0.047252177 | 0.133703042 | -5.0713969  | ns |
| CAMSAP1  | -0.04485778 | 0.043670477 | -1.98417468 | 0.047253952 | 0.133703042 | -5.07901968 | ns |
| SERPINA9 | -0.03092711 | 0.001594051 | -1.98135285 | 0.047569695 | 0.134466128 | -5.07445114 | ns |
| NAA80    | -0.04914686 | 0.011217804 | -1.97894605 | 0.0478402   | 0.134978348 | -5.07543991 | ns |
| NMT1     | -0.02672634 | 0.101346928 | -1.97891383 | 0.047843353 | 0.134978348 | -5.08936268 | ns |
| NDUFB7   | -0.0359452  | 0.022389467 | -1.97746555 | 0.04800676  | 0.135182726 | -5.09016726 | ns |
| NFE2     | -0.03074768 | 0.033972294 | -1.97745516 | 0.048008386 | 0.135182726 | -5.07774351 | ns |
| CCL19    | -0.05200729 | 0.236038158 | -1.97683927 | 0.048077488 | 0.135246883 | -5.09344062 | ns |
| CA13     | -0.04558439 | -0.11725211 | -1.97602648 | 0.048169756 | 0.135376021 | -5.08681783 | ns |
| PSPN     | 0.042812972 | -0.13095437 | 1.974008415 | 0.048398694 | 0.135761138 | -5.09406565 | ns |
| HSPA1A   | -0.03143249 | 0.024582347 | -1.97399841 | 0.048399776 | 0.135761138 | -5.09461181 | ns |
| CD69     | -0.03810807 | -0.07174419 | -1.97259241 | 0.048560095 | 0.136080112 | -5.09137037 | ns |
| KIF22    | -0.04940644 | -0.16132158 | -1.9720523  | 0.048621939 | 0.136122783 | -5.08750934 | ns |
| AKT2     | -0.0511458  | -0.03975172 | -1.97060749 | 0.04878653  | 0.136423817 | -5.10563733 | ns |
| PPP1R14A | -0.03184769 | -0.00945929 | -1.97028984 | 0.048822907 | 0.136423817 | -5.10625835 | ns |
| PARK7    | -0.02315868 | -0.00786113 | -1.96798525 | 0.049087685 | 0.137032542 | -5.10621726 | ns |
| CNPY2    | -0.02523356 | 0.093270407 | -1.96691581 | 0.049211241 | 0.137246251 | -5.09923281 | ns |
| SPINT2   | -0.01740781 | -0.02112183 | -1.9648674  | 0.049447519 | 0.137773622 | -5.11308862 | ns |
| FUS      | -0.01740093 | 0.009529481 | -1.963686   | 0.049584938 | 0.138024803 | -5.10399692 | ns |
| APPL2    | -0.045679   | -0.06227341 | -1.96137503 | 0.049853584 | 0.138592435 | -5.11009991 | ns |
| CCL14    | -0.01700402 | -0.02449548 | -1.96084786 | 0.049914972 | 0.138592435 | -5.11520737 | ns |
| SMPD1    | -0.02074013 | -0.01653308 | -1.96070631 | 0.049931247 | 0.138592435 | -5.122714   | ns |
| FGF5     | -0.01426884 | -0.00604983 | -1.95987354 | 0.050028931 | 0.138689393 | -5.11292808 | ns |
| VSNL1    | -0.0148288  | 0.002937973 | -1.95957413 | 0.050063483 | 0.138689393 | -5.12618751 | ns |
| KLK10    | -0.01687282 | -0.01359044 | -1.95918905 | 0.050108668 | 0.138689393 | -5.12357    | ns |
| TALDO1   | -0.01828655 | -0.00492585 | -1.95805317 | 0.050241785 | 0.138926147 | -5.12685381 | ns |
| HS1BP3   | -0.03635182 | -0.01056884 | -1.95733576 | 0.050326428 | 0.139028542 | -5.11700722 | ns |
| GORASP2  | -0.0190447  | 0.037415115 | -1.95463505 | 0.050644155 | 0.139774039 | -5.13470047 | ns |
| TP53     | -0.0184615  | -0.00850661 | -1.95042419 | 0.051144127 | 0.141020633 | -5.1303796  | ns |
| STXBP1   | -0.03091871 | -0.04055021 | -1.94641078 | 0.051623432 | 0.142106568 | -5.15265609 | ns |
| THPO     | -0.01626487 | -5.06E-05   | -1.9463165  | 0.051635298 | 0.142106568 | -5.13921348 | ns |
| NGFR     | -0.01130739 | 0.000947915 | -1.94500696 | 0.051792213 | 0.142272228 | -5.15445778 | ns |
| ADH1B    | -0.03072665 | 0.054649693 | -1.94478116 | 0.051819808 | 0.142272228 | -5.14224838 | ns |
| MGLL     | -0.03764061 | -0.09340847 | -1.94459735 | 0.051841661 | 0.142272228 | -5.1512561  | ns |
| CNTN4    | 0.01016437  | 0.008460208 | 1.944063338 | 0.051906037 | 0.142315145 | -5.15263964 | ns |
| RRM2B    | -0.02897306 | 0.014017249 | -1.94251022 | 0.052094002 | 0.142696516 | -5.14565978 | ns |
| PEAR1    | -0.00963095 | -0.00098816 | -1.94178086 | 0.052181717 | 0.142802825 | -5.16112944 | ns |
| DHRS4L2  | -0.01903235 | 0.068242472 | -1.94137101 | 0.052231392 | 0.14280493  | -5.16141398 | ns |
| ECHDC3   | -0.0287468  | 0.055146059 | -1.94091938 | 0.052286176 | 0.142820985 | -5.1623376  | ns |
| SEMA4D   | -0.01262607 | -0.00860303 | -1.93937716 | 0.052473543 | 0.143198827 | -5.16622164 | ns |
| MICALL2  | -0.02855214 | 0.130576645 | -1.93846754 | 0.052584801 | 0.143368459 | -5.15408727 | ns |
| SELP     | -0.02431041 | -0.00719233 | -1.93799021 | 0.052642728 | 0.143392506 | -5.16314592 | ns |
| NUDT5    | -0.02211769 | 0.009041588 | -1.93594639 | 0.052892582 | 0.143778133 | -5.1682623  | ns |
| C4BPB    | -0.01646399 | 0.004697046 | -1.93571651 | 0.052920669 | 0.143778133 | -5.17005497 | ns |
| SUGT1    | -0.03453704 | -0.02594051 | -1.93526363 | 0.052976673 | 0.143778133 | -5.15959691 | ns |
| POSTN    | 0.014564253 | 0.005027423 | 1.935221913 | 0.052981257 | 0.143778133 | -5.17274371 | ns |
| MMP3     | -0.02000583 | 0.007562566 | -1.9339511  | 0.053137477 | 0.144068183 | -5.17209262 | ns |
| IGFBP2   | -0.02903785 | -0.02548447 | -1.93316963 | 0.053233514 | 0.144194677 | -5.17664363 | ns |
| ASAH2    | -0.02316831 | -0.07316103 | -1.93231582 | 0.05333901  | 0.144346532 | -5.17183927 | ns |
| FADD     | -0.03230332 | -0.00390822 | -1.93146728 | 0.053443729 | 0.144496008 | -5.17424354 | ns |

|            |             |             |             |             |             |             |    |
|------------|-------------|-------------|-------------|-------------|-------------|-------------|----|
| DNM1       | -0.0452117  | -0.09300698 | -1.92898416 | 0.053751108 | 0.145192632 | -5.18411856 | ns |
| SOD2       | -0.01544327 | 0.000823853 | -1.92774166 | 0.053905672 | 0.145475565 | -5.1839875  | ns |
| TGFBR3     | -0.01331934 | -0.00747867 | -1.92657799 | 0.054050492 | 0.145677802 | -5.19030445 | ns |
| LEPR       | 0.013569427 | 0.027827652 | 1.926340298 | 0.05408039  | 0.145677802 | -5.18405455 | ns |
| CXCL10     | -0.02856076 | 0.031406084 | -1.92572708 | 0.054156831 | 0.14574926  | -5.18862819 | ns |
| CASP2      | -0.02865435 | 0.02706732  | -1.92411283 | 0.054358916 | 0.146158412 | -5.19054688 | ns |
| IGFBP1     | 0.05612497  | 0.008823951 | 1.921405944 | 0.054698885 | 0.146817302 | -5.1993196  | ns |
| MITD1      | -0.04176432 | -0.07896957 | -1.92136319 | 0.054704529 | 0.146817302 | -5.1927756  | ns |
| SMAD2      | -0.02717711 | 0.062553313 | -1.91949312 | 0.054940352 | 0.147253922 | -5.20240398 | ns |
| WNT9A      | -0.01175336 | -0.0054908  | -1.91927725 | 0.054968074 | 0.147253922 | -5.19103452 | ns |
| CSH1       | 0.012245796 | -0.01500649 | 1.918455628 | 0.055071636 | 0.147396129 | -5.2041929  | ns |
| CXCL3      | -0.04045123 | -0.09518409 | -1.91593038 | 0.055392551 | 0.148119275 | -5.20408352 | ns |
| TRIM24     | -0.02535694 | 0.040235476 | -1.9148551  | 0.0555297   | 0.14835016  | -5.20307718 | ns |
| IL1RAP     | 0.01917119  | 0.143366245 | 1.914082504 | 0.055628166 | 0.148407966 | -5.2100186  | ns |
| CCN1       | -0.03242004 | -0.1504574  | -1.91388919 | 0.055652987 | 0.148407966 | -5.20665671 | ns |
| XIAP       | -0.02292549 | 0.048017503 | -1.91275859 | 0.055797942 | 0.148658749 | -5.20122094 | ns |
| CASP7      | -0.03283486 | -0.01620743 | -1.91199219 | 0.055895612 | 0.148783214 | -5.21757439 | ns |
| CDC37      | -0.03534342 | 0.032377899 | -1.90960446 | 0.056202677 | 0.149464315 | -5.2198647  | ns |
| BCR        | -0.0383424  | -0.03220914 | -1.90555683 | 0.056726398 | 0.150621588 | -5.22579814 | ns |
| PZP        | -0.02136018 | 0.208852998 | -1.90544294 | 0.056741009 | 0.150621588 | -5.22973069 | ns |
| KLK12      | -0.05784246 | -0.54089191 | -1.90270338 | 0.057098337 | 0.151432465 | -5.22157649 | ns |
| EIF2AK3    | -0.02655448 | 0.105939308 | -1.90110094 | 0.057307897 | 0.151850327 | -5.22380352 | ns |
| NDST1      | -0.02465126 | 0.123615671 | -1.90003139 | 0.0574476   | 0.151946746 | -5.23927985 | ns |
| MERTK      | -0.01046639 | -0.01656015 | -1.90002486 | 0.057448359 | 0.151946746 | -5.24113931 | ns |
| PCBP2      | -0.0280225  | -0.00017281 | -1.89876362 | 0.057614088 | 0.152206101 | -5.24354614 | ns |
| DUSP13     | -0.01614449 | 0.043209695 | -1.89848629 | 0.057650667 | 0.152206101 | -5.24219138 | ns |
| MAPK9      | -0.0177541  | -0.01240264 | -1.8980789  | 0.057704437 | 0.152210438 | -5.23990761 | ns |
| REG1A      | -0.01963984 | 0.030304079 | -1.89537202 | 0.058062121 | 0.153015697 | -5.2387284  | ns |
| RABEP1     | -0.03051746 | 0.025085284 | -1.89178148 | 0.058539161 | 0.154045388 | -5.24309994 | ns |
| STOML2     | -0.03658403 | 0.116380286 | -1.89163871 | 0.05855835  | 0.154045388 | -5.23994383 | ns |
| GMFG       | -0.02790245 | -0.01471268 | -1.89113745 | 0.058624642 | 0.154080967 | -5.25697464 | ns |
| VPS37A     | -0.03351917 | 0.032096605 | -1.88837809 | 0.058994113 | 0.154912599 | -5.25544864 | ns |
| ANXA5      | -0.01204321 | -0.01588458 | -1.88622701 | 0.059283614 | 0.155532931 | -5.25273032 | ns |
| ARL13B     | -0.02739329 | 0.079931612 | -1.88471076 | 0.059488173 | 0.155929502 | -5.25457863 | ns |
| FXN        | -0.03016179 | -0.00255013 | -1.87988886 | 0.060141942 | 0.157501767 | -5.27956137 | ns |
| CD36       | -0.01734019 | 0.029869116 | -1.87866623 | 0.060309413 | 0.157798822 | -5.26532894 | ns |
| GADD45GIP1 | -0.02007131 | 0.036425935 | -1.87694948 | 0.060544312 | 0.158217901 | -5.26987871 | ns |
| PLA2G4A    | -0.03659123 | -0.02162898 | -1.87659248 | 0.060592844 | 0.158217901 | -5.28130585 | ns |
| PLXNA4     | -0.03385351 | -0.03786337 | -1.87621365 | 0.060644915 | 0.158217901 | -5.2808452  | ns |
| NUMB       | -0.03256744 | -0.0424034  | -1.87591495 | 0.060686318 | 0.158217901 | -5.27045226 | ns |
| ARL2BP     | -0.01569429 | 0.02596605  | -1.87428244 | 0.060910886 | 0.158661719 | -5.27402078 | ns |
| PDGFRA     | -0.01148703 | -0.00175355 | -1.87274024 | 0.061123308 | 0.159073138 | -5.28506325 | ns |
| LTA4H      | -0.02379994 | 0.041349871 | -1.8651007  | 0.062186147 | 0.161695057 | -5.30703636 | ns |
| TST        | -0.03079176 | 0.043955913 | -1.86281128 | 0.062508314 | 0.162141208 | -5.29576567 | ns |
| MRPL28     | -0.01400145 | 0.041628354 | -1.8626975  | 0.062523713 | 0.162141208 | -5.31084748 | ns |
| LILRB1     | -0.01134287 | -0.02574908 | -1.86269333 | 0.062524315 | 0.162141208 | -5.3103968  | ns |
| VSTM1      | -0.02014149 | -0.00777882 | -1.86210081 | 0.062608333 | 0.162215025 | -5.29825768 | ns |
| KLK15      | 0.019504031 | 0.013451287 | 1.859666328 | 0.062951775 | 0.162843601 | -5.31378914 | ns |
| SLIRP      | 0.022027504 | 0.093171032 | 1.859594335 | 0.062962475 | 0.162843601 | -5.29956119 | ns |
| UNC5D      | -0.01016203 | 0.01333901  | -1.85916478 | 0.063023307 | 0.162856688 | -5.30148178 | ns |
| DTX3       | -0.00936415 | -0.02128341 | -1.85553262 | 0.063539425 | 0.164045201 | -5.31644668 | ns |
| VWA5A      | 0.029869908 | 0.153254762 | 1.853809779 | 0.063785967 | 0.164536239 | -5.31021466 | ns |
| MYO6       | -0.01403067 | 0.021837581 | -1.85288778 | 0.06391741  | 0.164729776 | -5.32892979 | ns |
| ISLR2      | -0.01530579 | -0.00849424 | -1.85184872 | 0.064067181 | 0.164970165 | -5.31468458 | ns |
| GLO1       | -0.0240169  | -0.01448294 | -1.85144877 | 0.064124572 | 0.164972467 | -5.3179095  | ns |
| OTOA       | 0.020084167 | 0.09108119  | 1.850347895 | 0.064282972 | 0.165234401 | -5.3200006  | ns |
| WASF3      | -0.03401999 | -0.02752928 | -1.8498143  | 0.064359886 | 0.165279552 | -5.32087804 | ns |
| CXCL5      | -0.04694814 | -0.08330736 | -1.84912695 | 0.064458825 | 0.165279552 | -5.32679571 | ns |
| DYNLT1     | -0.03020644 | 0.141053321 | -1.84904834 | 0.064470346 | 0.165279552 | -5.32206533 | ns |
| HEG1       | -0.01017498 | -0.03468438 | -1.84770928 | 0.064663898 | 0.165630334 | -5.32484277 | ns |
| TBL1X      | -0.03497462 | -0.04315182 | -1.84722411 | 0.064734291 | 0.16566532  | -5.32476184 | ns |
| OGFR       | -0.01352606 | 0.002892987 | -1.84605815 | 0.064903069 | 0.165866915 | -5.33384312 | ns |
| CHCHD10    | -0.01464521 | -0.04371587 | -1.84589387 | 0.064926673 | 0.165866915 | -5.34079836 | ns |
| GNLY       | 0.021090397 | -0.04255065 | 1.844865155 | 0.065076384 | 0.166080541 | -5.3390861  | ns |
| ARHGEF10   | -0.03557561 | 0.042159981 | -1.84453639 | 0.065124048 | 0.166080541 | -5.34424875 | ns |
| ASRGL1     | -0.03869001 | 0.018850975 | -1.84365914 | 0.065252442 | 0.166262766 | -5.33131127 | ns |

|             |             |             |             |             |             |             |    |
|-------------|-------------|-------------|-------------|-------------|-------------|-------------|----|
| CGB3_CGB5_C | -0.01608845 | -0.00984943 | -1.84198685 | 0.065496189 | 0.166738337 | -5.34684442 | ns |
| TIA1        | -0.04880643 | 0.008295272 | -1.84147519 | 0.065571777 | 0.166785355 | -5.33153295 | ns |
| AP3B1       | -0.02925085 | 0.032140695 | -1.84085491 | 0.065661969 | 0.166869409 | -5.34893318 | ns |
| THTPA       | -0.03319938 | 0.001931599 | -1.83955415 | 0.065852927 | 0.167209171 | -5.35052937 | ns |
| SELL        | -0.00857782 | 0.010235057 | -1.83840996 | 0.066021147 | 0.167490661 | -5.35423015 | ns |
| CASP9       | -0.02320146 | 0.027052238 | -1.83745902 | 0.066161883 | 0.167701994 | -5.34127765 | ns |
| CXCL11      | -0.03126877 | 0.023056925 | -1.83433369 | 0.066623625 | 0.16872592  | -5.36287651 | ns |
| ING1        | -0.01866363 | 0.014180341 | -1.83328149 | 0.066780484 | 0.168938636 | -5.3497936  | ns |
| AMPD3       | 0.02752656  | 0.047963447 | 1.832936104 | 0.066831243 | 0.168938636 | -5.36444695 | ns |
| FCRLB       | -0.02382526 | 0.046436327 | -1.83244656 | 0.066904674 | 0.168938636 | -5.35173176 | ns |
| COMMD9      | -0.01473203 | 0.046024029 | -1.83221225 | 0.066939042 | 0.168938636 | -5.36484764 | ns |
| ITIH5       | -0.01718668 | 0.028145376 | -1.8301487  | 0.067246961 | 0.169284873 | -5.36859681 | ns |
| MBL2        | -0.04031956 | -0.09040089 | -1.82992265 | 0.06728103  | 0.169284873 | -5.36154349 | ns |
| BABAM1      | -0.01080172 | 0.022090663 | -1.82982446 | 0.067295981 | 0.169284873 | -5.355164   | ns |
| LRTM2       | -0.0101761  | 0.040097765 | -1.8297391  | 0.067308129 | 0.169284873 | -5.37122157 | ns |
| NCS1        | -0.01103141 | -0.0294056  | -1.82818802 | 0.067540522 | 0.169723172 | -5.37467027 | ns |
| AFM         | -0.007564   | -0.01221922 | -1.82577413 | 0.067903528 | 0.170488652 | -5.37719932 | ns |
| VPS4B       | -0.03533066 | 0.019127495 | -1.82425613 | 0.068132664 | 0.170666845 | -5.37927953 | ns |
| PKN3        | -0.027949   | 0.05040816  | -1.82399953 | 0.068171681 | 0.170666845 | -5.37298674 | ns |
| NT5C        | -0.02788558 | 0.006915487 | -1.82377416 | 0.068205484 | 0.170666845 | -5.38112145 | ns |
| GFRAL       | 0.022932492 | 0.029409398 | 1.823759552 | 0.06820829  | 0.170666845 | -5.3663282  | ns |
| LACTB2      | -0.02634787 | 0.015450258 | -1.82317806 | 0.06829592  | 0.1707398   | -5.37592755 | ns |
| HMBS        | 0.017610647 | -0.02120055 | 1.82114286  | 0.068604387 | 0.171085582 | -5.38742532 | ns |
| SOST        | 0.015602824 | -0.03158784 | 1.820753875 | 0.068663823 | 0.171085582 | -5.3797199  | ns |
| SARG        | -0.04132806 | -0.06807593 | -1.82072547 | 0.068667978 | 0.171085582 | -5.38444492 | ns |
| CSF3        | -0.01991103 | -0.0016873  | -1.8206195  | 0.068684491 | 0.171085582 | -5.37403923 | ns |
| PPM1F       | -0.01973564 | 0.009556691 | -1.8203357  | 0.068727188 | 0.171085582 | -5.38733761 | ns |
| SERPINA4    | -0.00876632 | -0.0074732  | -1.81942363 | 0.068866518 | 0.171286399 | -5.37926283 | ns |
| GAS6        | -0.00994161 | -0.00389406 | -1.81874124 | 0.068970338 | 0.171398627 | -5.38698354 | ns |
| TXNRD1      | -0.01888461 | 0.014519003 | -1.81574504 | 0.069428969 | 0.172241039 | -5.39196562 | ns |
| SIGLEC5     | -0.04736444 | -0.34862665 | -1.8151165  | 0.06952549  | 0.172241039 | -5.39309772 | ns |
| CST7        | -0.03814186 | 0.069101993 | -1.81506828 | 0.069532922 | 0.172241039 | -5.39190447 | ns |
| PSMD5       | 0.020615168 | 0.079579642 | 1.814989923 | 0.069545269 | 0.172241039 | -5.38396074 | ns |
| FABP3       | -0.01852656 | -0.02465986 | -1.81362183 | 0.069755312 | 0.17261484  | -5.39944139 | ns |
| IL36G       | -0.02507724 | 0.077347882 | -1.81266387 | 0.069903707 | 0.172835583 | -5.38451073 | ns |
| SORT1       | -0.01473785 | -0.00768881 | -1.81026063 | 0.07027501  | 0.173567947 | -5.39861971 | ns |
| ICAM5       | -0.01822588 | -0.04201857 | -1.80997804 | 0.070318795 | 0.173567947 | -5.3997169  | ns |
| BTC         | -0.02985454 | 0.089865594 | -1.80835825 | 0.070570723 | 0.174042662 | -5.39523025 | ns |
| CDH5        | -0.01174492 | 0.02301617  | -1.80664886 | 0.070836417 | 0.174550497 | -5.41241797 | ns |
| OPLAH       | -0.02559041 | 0.026716267 | -1.80469114 | 0.071142971 | 0.175158073 | -5.4018252  | ns |
| SEPTIN9     | -0.01141362 | 0.026481088 | -1.80236129 | 0.071508256 | 0.175909106 | -5.41292462 | ns |
| DDC         | 0.018765047 | 0.041972203 | 1.800334824 | 0.071827494 | 0.176545693 | -5.41639699 | ns |
| TNFRSF6B    | -0.02176647 | -0.0338869  | -1.79851193 | 0.072115662 | 0.177104905 | -5.41945995 | ns |
| STXBP3      | -0.01707708 | 0.054212812 | -1.79298132 | 0.072995994 | 0.17911622  | -5.42269691 | ns |
| MRPL46      | -0.01045469 | 0.007839907 | -1.79240644 | 0.073087938 | 0.179191249 | -5.42458648 | ns |
| MLN         | -0.0353484  | -0.0711332  | -1.79079753 | 0.073345496 | 0.179671853 | -5.43622331 | ns |
| CRISP2      | 0.022657817 | -0.04755949 | 1.789177573 | 0.073605716 | 0.180158164 | -5.44467912 | ns |
| PSME2       | -0.01473662 | -0.00070037 | -1.78756804 | 0.07386563  | 0.180642914 | -5.43706639 | ns |
| CAMKK1      | -0.01768844 | 0.027057884 | -1.78528132 | 0.074235839 | 0.18139636  | -5.43636277 | ns |
| RILPL2      | -0.03601739 | -0.07044128 | -1.78324169 | 0.074566545 | 0.1820521   | -5.4536519  | ns |
| FMNL1       | -0.025058   | 0.016024313 | -1.7827364  | 0.074649349 | 0.182102004 | -5.44173401 | ns |
| EFCAB2      | -0.01279894 | 0.026918773 | -1.78149922 | 0.074850805 | 0.182441028 | -5.44899703 | ns |
| SEL1L       | -0.01143654 | 0.00306191  | -1.77769214 | 0.075474581 | 0.183558978 | -5.44979781 | ns |
| SCT         | 0.016529949 | 0.04387826  | 1.777234895 | 0.075549704 | 0.183558978 | -5.45122992 | ns |
| ICOSLG      | -0.00744915 | 0.003342288 | -1.77716894 | 0.075560313 | 0.183558978 | -5.45765662 | ns |
| CA11        | -0.01195928 | 0.047150199 | -1.77716729 | 0.075560922 | 0.183558978 | -5.45069982 | ns |
| LRFN2       | 0.017456553 | 0.057596577 | 1.776345223 | 0.075696144 | 0.183734614 | -5.45279802 | ns |
| SERPING1    | 0.006843336 | -0.01211803 | 1.775709332 | 0.075800507 | 0.183835117 | -5.46505766 | ns |
| MUC16       | -0.07347291 | -0.57778733 | -1.77463934 | 0.075977339 | 0.184111062 | -5.46211344 | ns |
| CUZD1       | -0.01348337 | 0.048279027 | -1.7736383  | 0.076143128 | 0.184290603 | -5.45756434 | ns |
| ZNRD2       | -0.02467546 | 0.042293767 | -1.773427   | 0.076177657 | 0.184290603 | -5.4698322  | ns |
| CTSV        | 0.015830497 | 0.03414461  | 1.772564248 | 0.076320626 | 0.184483632 | -5.47209252 | ns |
| SPART       | -0.02860417 | 0.012599756 | -1.77206777 | 0.076403409 | 0.18453098  | -5.46064932 | ns |
| DAG1        | -0.01887301 | -0.01277484 | -1.77016939 | 0.076718689 | 0.185139315 | -5.47383234 | ns |
| TCL1A       | -0.03883886 | -0.04303184 | -1.76942763 | 0.076842519 | 0.185228946 | -5.47003129 | ns |
| MAEA        | -0.01527171 | 0.026024076 | -1.76905246 | 0.076905381 | 0.185228946 | -5.46497298 | ns |

|           |             |             |             |             |             |             |    |
|-----------|-------------|-------------|-------------|-------------|-------------|-------------|----|
| MYCBP2    | -0.02462071 | 0.084376171 | -1.76880453 | 0.076946134 | 0.185228946 | -5.48000598 | ns |
| PTPN1     | -0.03132273 | 0.050322175 | -1.76799019 | 0.077082508 | 0.185404386 | -5.47345741 | ns |
| ITPA      | -0.02438992 | 0.00633964  | -1.76684961 | 0.077273707 | 0.185711295 | -5.46803698 | ns |
| PPP1CC    | -0.03019142 | 0.042253375 | -1.76546501 | 0.077505394 | 0.186114928 | -5.4839769  | ns |
| CFHR2     | -0.02063627 | -0.12068006 | -1.76503563 | 0.077577643 | 0.186135348 | -5.48155125 | ns |
| CDC26     | -0.02564606 | 0.044959505 | -1.76380269 | 0.077784995 | 0.186479626 | -5.48539537 | ns |
| ADA       | -0.01352547 | 0.013489919 | -1.76181295 | 0.078120575 | 0.1871305   | -5.49222226 | ns |
| OSMR      | -0.00783411 | -0.01526847 | -1.76123355 | 0.07821874  | 0.187209773 | -5.48893297 | ns |
| LTO1      | -0.01614209 | 0.019807427 | -1.76043701 | 0.078353973 | 0.187209773 | -5.4809352  | ns |
| TWF2      | -0.03049927 | 0.016038867 | -1.76040272 | 0.07835929  | 0.187209773 | -5.49325087 | ns |
| CPM       | -0.01422354 | -0.0439586  | -1.76010326 | 0.078410121 | 0.187209773 | -5.49297234 | ns |
| TEK       | -0.00812871 | 0.00625458  | -1.75914879 | 0.078572049 | 0.187443123 | -5.49369219 | ns |
| ARHGAP1   | -0.01801742 | -0.00398809 | -1.75672402 | 0.078985206 | 0.188115458 | -5.48653251 | ns |
| FDX1      | -0.0226061  | 0.029802993 | -1.75630334 | 0.079056988 | 0.188115458 | -5.48646596 | ns |
| NFX1      | -0.02475307 | 0.063418784 | -1.75554607 | 0.079186313 | 0.188115458 | -5.487785   | ns |
| DNAJB6    | -0.03062398 | -0.00258238 | -1.75510366 | 0.079262005 | 0.188115458 | -5.48547732 | ns |
| NUB1      | -0.03235268 | 0.044894868 | -1.75493477 | 0.079290422 | 0.188115458 | -5.49930362 | ns |
| GCG       | -0.04850943 | 0.020933821 | -1.75489922 | 0.079296903 | 0.188115458 | -5.48971084 | ns |
| DCC       | -0.0081535  | 0.018421443 | -1.75485227 | 0.079304839 | 0.188115458 | -5.49044231 | ns |
| CD86      | -0.0102058  | -0.00165069 | -1.75253738 | 0.079701266 | 0.188544255 | -5.50637267 | ns |
| APOD      | 0.015611524 | 0.047112269 | 1.752381107 | 0.079729005 | 0.188544255 | -5.48508836 | ns |
| NECAP2    | -0.02397773 | 0.090447479 | -1.75236653 | 0.079731189 | 0.188544255 | -5.49331702 | ns |
| TDP1      | -0.02585796 | 0.089321489 | -1.75228943 | 0.079743889 | 0.188544255 | -5.50697026 | ns |
| FKBP7     | -0.01816974 | 0.046984911 | -1.75075479 | 0.080008554 | 0.188810787 | -5.49649597 | ns |
| AKR7L     | -0.02493626 | 0.074744932 | -1.75061491 | 0.080032659 | 0.188810787 | -5.49582635 | ns |
| CES1      | -0.03130883 | 0.040288191 | -1.75050831 | 0.080050601 | 0.188810787 | -5.5061364  | ns |
| CASC3     | -0.01497222 | 0.029887722 | -1.74911201 | 0.080291956 | 0.189051598 | -5.5004187  | ns |
| TIMP2     | -0.00899185 | -0.00708621 | -1.74906189 | 0.080300129 | 0.189051598 | -5.5135483  | ns |
| FGF16     | 0.017017855 | 0.023372222 | 1.748794643 | 0.080346929 | 0.189051598 | -5.49898571 | ns |
| CXCL14    | 0.023933772 | 0.046778147 | 1.747556764 | 0.080561125 | 0.18933535  | -5.50334648 | ns |
| SAT1      | 0.01793201  | 0.094941549 | 1.746912689 | 0.080672906 | 0.18933535  | -5.50278274 | ns |
| DPP7      | -0.0226838  | -0.0288278  | -1.74687546 | 0.080679102 | 0.18933535  | -5.50866247 | ns |
| C7        | -0.01096387 | -0.02684234 | -1.74660107 | 0.080726887 | 0.18933535  | -5.50576351 | ns |
| TREH      | 0.027076344 | -0.05782232 | 1.745344376 | 0.080944779 | 0.189694024 | -5.51944044 | ns |
| MED21     | -0.01853888 | 0.072308115 | -1.74440133 | 0.081109571 | 0.189927784 | -5.50713154 | ns |
| EIF4G3    | -0.02399421 | 0.084483404 | -1.74354405 | 0.081258424 | 0.190097092 | -5.52402292 | ns |
| MYL3      | 0.025682967 | 0.031650908 | 1.743240033 | 0.081312078 | 0.190097092 | -5.50996371 | ns |
| ICA1      | -0.0305348  | 0.050665138 | -1.73994778 | 0.081888554 | 0.191233479 | -5.51650862 | ns |
| BCL2L1    | -0.0354737  | -0.02771123 | -1.73964747 | 0.081940788 | 0.191233479 | -5.52978845 | ns |
| FRMD4B    | -0.02586759 | 0.107944685 | -1.73919138 | 0.082021575 | 0.191233479 | -5.51613343 | ns |
| VSIG10L   | -0.01160352 | 0.011452428 | -1.73897223 | 0.082060119 | 0.191233479 | -5.5165115  | ns |
| CRIP2     | -0.01423425 | -0.04293681 | -1.73850745 | 0.082141594 | 0.191270697 | -5.52473955 | ns |
| CTRL      | -0.02336577 | -0.00451214 | -1.73562536 | 0.082649972 | 0.192301131 | -5.536723   | ns |
| PDE5A     | -0.03724876 | -0.10372039 | -1.73430481 | 0.082884361 | 0.192692941 | -5.52632562 | ns |
| TRIM58    | -0.03090311 | 0.022676065 | -1.73383558 | 0.082967208 | 0.192732099 | -5.53888553 | ns |
| GAD2      | -0.01629867 | 0.056749684 | -1.73166638 | 0.083353491 | 0.193331252 | -5.52855353 | ns |
| RIDA      | -0.01807336 | 0.006284974 | -1.73164276 | 0.08335755  | 0.193331252 | -5.53090204 | ns |
| RET       | -0.0149995  | -0.01237474 | -1.72998154 | 0.083653742 | 0.193864228 | -5.53974989 | ns |
| GPI       | -0.01666041 | 0.021123681 | -1.72873183 | 0.083877041 | 0.194227565 | -5.54746534 | ns |
| SPRR1B    | -0.03040182 | 0.165800298 | -1.72782849 | 0.0840392   | 0.194355829 | -5.54242594 | ns |
| TXLNA     | -0.03414666 | -0.04624047 | -1.72768155 | 0.084065552 | 0.194355829 | -5.54335369 | ns |
| ATPGAP2   | -0.01553274 | 0.028756029 | -1.72701345 | 0.084185777 | 0.194479801 | -5.53787003 | ns |
| LY96      | -0.01359172 | -0.01404267 | -1.72631837 | 0.084310379 | 0.194613681 | -5.54568931 | ns |
| FGA       | -0.01109611 | -0.01775554 | -1.72542788 | 0.084470844 | 0.194780844 | -5.54181787 | ns |
| CHMP6     | -0.01997828 | -0.00209713 | -1.72517322 | 0.084516209 | 0.194780844 | -5.55472269 | ns |
| PLA2G1B   | -0.01601549 | 0.024443962 | -1.72398639 | 0.084730271 | 0.194927669 | -5.55547581 | ns |
| NFKB1     | -0.02651783 | 0.016001264 | -1.72383034 | 0.084759037 | 0.194927669 | -5.54251798 | ns |
| CACNA1C   | -0.01144051 | 0.02314259  | -1.7237129  | 0.084780185 | 0.194927669 | -5.5444903  | ns |
| LAP3      | -0.01841712 | -0.01718026 | -1.72315936 | 0.084880174 | 0.195004019 | -5.54534638 | ns |
| CILP      | -0.01890313 | -0.08372801 | -1.72268146 | 0.084966112 | 0.195047994 | -5.55843199 | ns |
| GATD3     | -0.02716161 | 0.025262772 | -1.72032303 | 0.085394258 | 0.195876852 | -5.54933329 | ns |
| SEMA3G    | -0.01521853 | 0.028069017 | -1.71956236 | 0.085532454 | 0.196039847 | -5.55158151 | ns |
| CEBPA     | -0.01365628 | 0.048671643 | -1.71800745 | 0.085815845 | 0.196535112 | -5.55192389 | ns |
| NFIC      | -0.01545817 | 0.05872239  | -1.71711119 | 0.085978675 | 0.196753707 | -5.5694039  | ns |
| GABARAPL1 | -0.0241222  | 0.151129101 | -1.71434564 | 0.086485561 | 0.197758684 | -5.56544765 | ns |
| GSTA3     | -0.02983747 | 0.061480986 | -1.71212882 | 0.086893542 | 0.198414895 | -5.56326039 | ns |

|           |             |             |             |             |             |             |    |
|-----------|-------------|-------------|-------------|-------------|-------------|-------------|----|
| RAD51     | 0.019028215 | 0.045274108 | 1.712046314 | 0.086908442 | 0.198414895 | -5.56935572 | ns |
| APEX1     | -0.02281388 | -0.01695463 | -1.71146653 | 0.087015074 | 0.198503137 | -5.57777761 | ns |
| VSIR      | -0.02302845 | 0.061948223 | -1.70917298 | 0.087439181 | 0.199314916 | -5.57569143 | ns |
| TPR       | -0.01735901 | 0.035559665 | -1.70873607 | 0.087520492 | 0.199344646 | -5.5682164  | ns |
| MAX       | -0.03963257 | -0.00364015 | -1.7064872  | 0.087938012 | 0.200045931 | -5.57369589 | ns |
| VEGFB     | -0.01018845 | -0.0276868  | -1.70634023 | 0.087965403 | 0.200045931 | -5.57173995 | ns |
| AKT3      | -0.02148552 | 0.020927993 | -1.70583947 | 0.088058734 | 0.200102336 | -5.57104069 | ns |
| ABRAXAS2  | -0.02323895 | 0.023782127 | -1.70182471 | 0.088808911 | 0.201650094 | -5.57990779 | ns |
| SRP14     | -0.02341747 | -0.01340821 | -1.69959543 | 0.089227381 | 0.202442853 | -5.59144467 | ns |
| KLK11     | -0.01089052 | -0.0091138  | -1.69777466 | 0.08957061  | 0.203063805 | -5.59499845 | ns |
| PEBP1     | -0.02231862 | 0.00087832  | -1.69670839 | 0.089772055 | 0.203362607 | -5.59938036 | ns |
| KAZN      | -0.03657414 | -0.05088238 | -1.69486108 | 0.090121911 | 0.203996884 | -5.60501383 | ns |
| PBXIP1    | -0.01068748 | 0.009272955 | -1.69141321 | 0.090778061 | 0.205185018 | -5.61080606 | ns |
| TARM1     | 0.026986759 | 0.174656274 | 1.691322274 | 0.090795883 | 0.205185018 | -5.59903518 | ns |
| CSF3R     | -0.00973128 | -0.0081714  | -1.69099956 | 0.090857613 | 0.205185018 | -5.59758972 | ns |
| DNAJA1    | 0.015796206 | 0.037094083 | 1.688722042 | 0.091293462 | 0.206009977 | -5.60027365 | ns |
| OXT       | -0.05454186 | 0.000105097 | -1.68768417 | 0.091491981 | 0.20606268  | -5.61911954 | ns |
| NUDT16    | -0.03028462 | 0.000502154 | -1.68766579 | 0.09149561  | 0.20606268  | -5.61638154 | ns |
| NFASC     | -0.00987477 | -0.0135977  | -1.68730232 | 0.091565314 | 0.20606268  | -5.61972202 | ns |
| CCS       | 0.017515149 | 0.028143193 | 1.687128369 | 0.091599095 | 0.20606268  | -5.61204799 | ns |
| TACC3     | -0.04378701 | -0.05320279 | -1.68575131 | 0.091864102 | 0.206499752 | -5.61469352 | ns |
| SH3BP1    | -0.01716427 | 0.081250058 | -1.68466122 | 0.092074132 | 0.206812665 | -5.62211486 | ns |
| FKBP14    | -0.03441814 | -0.03884897 | -1.6839401  | 0.092213352 | 0.20696617  | -5.62537558 | ns |
| SCPEP1    | -0.01731075 | -0.00077027 | -1.68328242 | 0.0923412   | 0.207093935 | -5.61004658 | ns |
| STK24     | -0.02267836 | 0.03087498  | -1.68031625 | 0.09291653  | 0.208224303 | -5.61766009 | ns |
| PGLYRP1   | -0.01546667 | -0.00844634 | -1.67501962 | 0.093950659 | 0.21038031  | -5.63666383 | ns |
| BNIP3L    | -0.01521384 | 0.024587305 | -1.67336198 | 0.094276861 | 0.210861732 | -5.62702151 | ns |
| FASLG     | 0.013754636 | 0.042671887 | 1.673189795 | 0.094310076 | 0.210861732 | -5.64325058 | ns |
| BAG4      | -0.01682601 | 0.03790814  | -1.6718846  | 0.094567889 | 0.211268539 | -5.62947281 | ns |
| CD4       | -0.01082604 | -0.02624323 | -1.67153374 | 0.094636729 | 0.211268539 | -5.63981952 | ns |
| HPSE      | -0.03198346 | -0.08430357 | -1.67104432 | 0.094733427 | 0.211322847 | -5.63879982 | ns |
| PDIA5     | -0.02065969 | 0.027333797 | -1.66934568 | 0.095069727 | 0.211860727 | -5.63254587 | ns |
| UROS      | 0.023625597 | 0.06859401  | 1.669092988 | 0.095119662 | 0.211860727 | -5.63608686 | ns |
| HIF1A     | -0.02261982 | 0.100497978 | -1.66564548 | 0.09580488  | 0.213121788 | -5.63980101 | ns |
| GPA33     | 0.050461152 | 0.084181281 | 1.665508533 | 0.095831818 | 0.213121788 | -5.64834569 | ns |
| TNFRSF13C | -0.01534678 | -0.02108308 | -1.66395065 | 0.096143032 | 0.213651183 | -5.64481925 | ns |
| STX16     | -0.02159218 | 0.08181261  | -1.66255517 | 0.096422346 | 0.214108936 | -5.64623935 | ns |
| TSC1      | -0.02606321 | 0.165846253 | -1.66090741 | 0.096752893 | 0.214584093 | -5.64761859 | ns |
| SLC44A4   | -0.02334597 | 0.144008815 | -1.6604409  | 0.096846529 | 0.214584093 | -5.65037564 | ns |
| ECI2      | -0.02102021 | 0.081604194 | -1.66039042 | 0.096856793 | 0.214584093 | -5.64900559 | ns |
| CAPN3     | -0.01312834 | 0.041324709 | -1.65766186 | 0.097406038 | 0.215637325 | -5.66705065 | ns |
| CA8       | -0.00877987 | 0.02581641  | -1.65722022 | 0.097495824 | 0.21567258  | -5.65368688 | ns |
| MSTN      | -0.01886228 | 0.014857572 | -1.65684647 | 0.097571341 | 0.215676242 | -5.65654114 | ns |
| TBR1      | 0.016472341 | 0.082587646 | 1.656091725 | 0.097724002 | 0.215805265 | -5.65753021 | ns |
| NFATC3    | -0.02174137 | 0.109977462 | -1.65561208 | 0.097821174 | 0.215805265 | -5.6585491  | ns |
| FDX2      | -0.01957869 | 0.026710124 | -1.6554633  | 0.097851429 | 0.215805265 | -5.65710903 | ns |
| RASSF2    | -0.02125618 | 0.032255231 | -1.65487545 | 0.097970627 | 0.215901168 | -5.65887605 | ns |
| BPIFA2    | 0.038012936 | 0.132636422 | 1.654290391 | 0.098090087 | 0.215901168 | -5.64240409 | ns |
| HMMR      | 0.016450064 | 0.057454686 | 1.65415615  | 0.09811673  | 0.215901168 | -5.6562267  | ns |
| PBK       | 0.010363039 | -0.00099361 | 1.653253648 | 0.098300146 | 0.216138948 | -5.65906491 | ns |
| ACTN2     | 0.020099076 | 0.079728462 | 1.652896415 | 0.09837283  | 0.216138948 | -5.66132115 | ns |
| SPAG1     | -0.01965796 | 0.053027227 | -1.65093112 | 0.098772869 | 0.216854721 | -5.6799891  | ns |
| FHIT      | -0.0268919  | -0.02496578 | -1.64916927 | 0.099133806 | 0.217219939 | -5.66909823 | ns |
| CABP2     | -0.02259703 | 0.107420937 | -1.64913213 | 0.099141348 | 0.217219939 | -5.66893997 | ns |
| GIMAP7    | 0.010337705 | 0.012774345 | 1.649029211 | 0.09916239  | 0.217219939 | -5.66943245 | ns |
| MIF       | -0.02502564 | -0.04617923 | -1.64816379 | 0.099339555 | 0.217444903 | -5.67885636 | ns |
| IRAK1     | -0.0254112  | 0.040088056 | -1.64639636 | 0.099702984 | 0.217852391 | -5.673643   | ns |
| LRP1      | -0.00967593 | 0.014044627 | -1.64637058 | 0.099708026 | 0.217852391 | -5.67978743 | ns |
| ARHGAP25  | -0.0216882  | 0.061211885 | -1.64617057 | 0.099749537 | 0.217852391 | -5.6731289  | ns |
| ENTR1     | -0.01978099 | 0.065945696 | -1.64306073 | 0.100391219 | 0.218816758 | -5.67822613 | ns |
| SPP1      | -0.01603323 | -0.01950902 | -1.6429987  | 0.100403507 | 0.218816758 | -5.69144312 | ns |
| PRDX1     | -0.03092675 | 0.10592598  | -1.64294226 | 0.100415909 | 0.218816758 | -5.67543197 | ns |
| VAMP8     | -0.02971934 | 0.008701051 | -1.63969562 | 0.101089391 | 0.220120075 | -5.68234411 | ns |
| CERT      | -0.02187032 | -0.00329397 | -1.63819924 | 0.101401018 | 0.220562742 | -5.68698579 | ns |
| DNAJB1    | -0.03198422 | -0.03943587 | -1.6379616  | 0.10145027  | 0.220562742 | -5.69348768 | ns |
| ITGAL     | -0.01487374 | -0.03994738 | -1.63763258 | 0.10151929  | 0.220562742 | -5.68569768 | ns |

|           |             |             |             |             |             |             |    |
|-----------|-------------|-------------|-------------|-------------|-------------|-------------|----|
| SMTN      | -0.03303917 | 0.163001878 | -1.63641564 | 0.101772969 | 0.220845758 | -5.70198319 | ns |
| MINDY1    | -0.03649042 | -0.0426184  | -1.63628263 | 0.101800819 | 0.220845758 | -5.7019877  | ns |
| LSP1      | -0.0148129  | -0.01668445 | -1.63305675 | 0.10247758  | 0.222148874 | -5.70414584 | ns |
| GH2       | 0.059192991 | 0.507137291 | 1.630194932 | 0.103081242 | 0.223291711 | -5.69909097 | ns |
| ADAMTSL5  | -0.01297395 | 0.005379238 | -1.62900663 | 0.103331952 | 0.223517668 | -5.71474933 | ns |
| IL22      | -0.02188156 | 0.027189357 | -1.62879078 | 0.103377705 | 0.223517668 | -5.71412329 | ns |
| MAP4K5    | -0.04050354 | -0.05973833 | -1.62861514 | 0.103415195 | 0.223517668 | -5.70701354 | ns |
| STAT2     | -0.02589221 | 0.025058675 | -1.62343672 | 0.104517045 | 0.225732079 | -5.70865926 | ns |
| HAO1      | -0.04614056 | 0.020620964 | -1.62257044 | 0.104701574 | 0.225846713 | -5.72668626 | ns |
| TINAGL1   | -0.00781687 | -0.01256524 | -1.62246345 | 0.104724812 | 0.225846713 | -5.71746164 | ns |
| CRYM      | -0.02477326 | 0.103205441 | -1.62125418 | 0.104984046 | 0.226041018 | -5.71448408 | ns |
| TPPP2     | 0.026352503 | 0.081118914 | 1.620959837 | 0.105046903 | 0.226041018 | -5.71995345 | ns |
| HK2       | -0.00945535 | -0.00680668 | -1.62096    | 0.105047144 | 0.226041018 | -5.71488687 | ns |
| SLC9A3R1  | -0.02820653 | 0.006415534 | -1.61996215 | 0.105261228 | 0.226334894 | -5.71656395 | ns |
| PTS       | -0.01974415 | 0.018822638 | -1.61862926 | 0.105548089 | 0.226765554 | -5.71662581 | ns |
| CRYZL1    | -0.03077655 | -0.00707406 | -1.61830949 | 0.105616833 | 0.226765554 | -5.71826546 | ns |
| DGKA      | -0.01795202 | 0.034660368 | -1.61582082 | 0.106154041 | 0.22772057  | -5.72089549 | ns |
| TMEM106A  | -0.02311481 | 0.019383319 | -1.61552436 | 0.106217608 | 0.22772057  | -5.7354762  | ns |
| CEBPB     | -0.01319081 | 0.014006497 | -1.61423337 | 0.106497758 | 0.228153671 | -5.72568118 | ns |
| CIAPIN1   | -0.02250836 | -0.0048109  | -1.61365432 | 0.106622867 | 0.228254231 | -5.73713795 | ns |
| ANXA10    | -0.02742339 | 0.044104346 | -1.61253412 | 0.106866703 | 0.228608625 | -5.72836866 | ns |
| PCDHB15   | -0.01302509 | 0.013597725 | -1.61024295 | 0.107365257 | 0.229405029 | -5.74392828 | ns |
| AIF1      | -0.01848923 | -0.01505848 | -1.61010407 | 0.107396121 | 0.229405029 | -5.73138142 | ns |
| PM20D1    | 0.066956578 | -0.5239588  | 1.608169204 | 0.107818862 | 0.230105584 | -5.73951641 | ns |
| ARHGAP45  | -0.02722202 | -0.00201376 | -1.60788266 | 0.107881724 | 0.230105584 | -5.73590406 | ns |
| HBQ1      | 0.022172861 | 0.055969472 | 1.60752087  | 0.107960496 | 0.230105584 | -5.75080403 | ns |
| CINP      | -0.01513237 | 0.058903026 | -1.60491772 | 0.108532596 | 0.231156222 | -5.74562447 | ns |
| FABP9     | -0.01980882 | 0.02416113  | -1.6044059  | 0.108645192 | 0.231227377 | -5.75016103 | ns |
| ARHGEF5   | -0.02460234 | 0.062920942 | -1.60400098 | 0.108734781 | 0.231249498 | -5.74208553 | ns |
| IL18      | -0.01624358 | -0.0342467  | -1.60313501 | 0.108925523 | 0.231486555 | -5.74874328 | ns |
| NIT1      | -0.01579105 | -0.06819289 | -1.60241602 | 0.109084592 | 0.231656007 | -5.74365554 | ns |
| PIBF1     | -0.02551283 | 0.025787118 | -1.60056076 | 0.109494589 | 0.232357704 | -5.76124421 | ns |
| LAIR2     | -0.03703442 | -0.13744056 | -1.60016494 | 0.109582684 | 0.232375771 | -5.75385915 | ns |
| CD300LG   | -0.01270739 | 0.019753201 | -1.59855574 | 0.109939908 | 0.232964101 | -5.75983459 | ns |
| BCL2L11   | -0.01533678 | -0.07996345 | -1.59635849 | 0.110429372 | 0.233802574 | -5.76293926 | ns |
| FST       | 0.017863327 | 0.010201476 | 1.596060912 | 0.110495737 | 0.233802574 | -5.76343162 | ns |
| TYRO3     | -0.00993679 | -0.01199441 | -1.59448792 | 0.110847439 | 0.234376917 | -5.76364146 | ns |
| UBE2Z     | -0.01959525 | 0.096815073 | -1.59281664 | 0.111222353 | 0.234999473 | -5.75750634 | ns |
| ADGRE5    | -0.0104012  | 0.006426324 | -1.5914124  | 0.111537296 | 0.235331152 | -5.77214683 | ns |
| HSPA2     | -0.0109994  | 0.008452284 | -1.59139788 | 0.111540519 | 0.235331152 | -5.77386142 | ns |
| IPCEF1    | -0.03187379 | -0.05433919 | -1.59066803 | 0.111705045 | 0.23550811  | -5.7678748  | ns |
| GAS2      | -0.01733811 | 0.061635028 | -1.58963676 | 0.111937411 | 0.235795091 | -5.7698401  | ns |
| TMED8     | -0.03370048 | -0.03805682 | -1.58934633 | 0.112002668 | 0.235795091 | -5.77693164 | ns |
| ORM1      | -0.00661286 | -0.00760453 | -1.58602388 | 0.112754373 | 0.237206606 | -5.78130364 | ns |
| KIR2DL2   | -0.02737461 | -0.03595269 | -1.58354532 | 0.113317692 | 0.238061819 | -5.78623031 | ns |
| MAPK13    | -0.01386676 | -0.01175197 | -1.58352041 | 0.113323948 | 0.238061819 | -5.77101521 | ns |
| LAMP2     | 0.00668663  | -0.01160369 | 1.582189188 | 0.113627457 | 0.238527802 | -5.77530351 | ns |
| PLXDC2    | 0.008519781 | 0.012825755 | 1.58147807  | 0.113789173 | 0.238695678 | -5.79039816 | ns |
| PCNA      | 0.021332778 | 0.143699095 | 1.578520153 | 0.114467216 | 0.239945635 | -5.77885737 | ns |
| HMOX2     | -0.01614968 | 0.033659794 | -1.57690682 | 0.114837959 | 0.2405501   | -5.78473197 | ns |
| GP5       | -0.0116539  | -0.03932689 | -1.57577612 | 0.115098294 | 0.240846645 | -5.78660551 | ns |
| HYOU1     | -0.0073737  | -0.01521823 | -1.57516417 | 0.115238949 | 0.240846645 | -5.80079645 | ns |
| NFYA      | -0.0126963  | 0.041567128 | -1.57495069 | 0.11528887  | 0.240846645 | -5.78611423 | ns |
| CGA       | -0.02887222 | 0.196103708 | -1.57455474 | 0.115379839 | 0.240846645 | -5.79761608 | ns |
| LDLRAP1   | -0.03141907 | -0.0308755  | -1.57416087 | 0.115470642 | 0.240846645 | -5.80282609 | ns |
| MCEMP1    | -0.02921922 | 0.065267171 | -1.57414739 | 0.115474419 | 0.240846645 | -5.78683244 | ns |
| MKI67     | -0.01263934 | 0.045300991 | -1.57325183 | 0.115681559 | 0.241106461 | -5.78823052 | ns |
| IL20      | -0.01732625 | 0.048024629 | -1.5718743  | 0.116000648 | 0.241599068 | -5.79260416 | ns |
| CNP       | -0.02597931 | -0.0023474  | -1.57136693 | 0.116118466 | 0.241668908 | -5.79142569 | ns |
| DDI2      | 0.025420715 | 0.046574761 | 1.571016491 | 0.116199708 | 0.241668908 | -5.79403472 | ns |
| ENAH      | -0.01624463 | -0.00498068 | -1.57023111 | 0.116382298 | 0.241831954 | -5.79516516 | ns |
| MSR1      | -0.01596739 | -0.07517273 | -1.56996463 | 0.116443742 | 0.241831954 | -5.80937862 | ns |
| TNFAIP8L2 | -0.02015717 | 0.055873011 | -1.56922631 | 0.116616105 | 0.242017788 | -5.79682316 | ns |
| CLIC5     | -0.00993108 | 0.025628319 | -1.56869075 | 0.116740948 | 0.242104806 | -5.79733195 | ns |
| ADRA2A    | -0.02360263 | 0.188818132 | -1.56691441 | 0.117155748 | 0.242570214 | -5.79863791 | ns |
| HNRNPUL1  | -0.01612924 | 0.024157675 | -1.5663565  | 0.117285564 | 0.242570214 | -5.81498619 | ns |

|            |             |             |             |             |             |             |    |
|------------|-------------|-------------|-------------|-------------|-------------|-------------|----|
| DBH        | 0.03521899  | -0.1734946  | 1.566353121 | 0.117286467 | 0.242570214 | -5.81182438 | ns |
| FZD8       | -0.0134551  | 0.031289131 | -1.56630741 | 0.117297651 | 0.242570214 | -5.80136023 | ns |
| GIPC3      | -0.0315997  | -0.09430871 | -1.56457562 | 0.117702913 | 0.243236026 | -5.81569064 | ns |
| CR2        | -0.015917   | 0.002131041 | -1.5641919  | 0.117793121 | 0.243250292 | -5.81255102 | ns |
| CEACAM21   | -0.02954293 | 0.246080803 | -1.56359444 | 0.117933463 | 0.243367994 | -5.8143011  | ns |
| AKT1S1     | -0.02288316 | -0.02756892 | -1.56121221 | 0.118494689 | 0.24419406  | -5.80916184 | ns |
| ADAMTS4    | -0.01125792 | -0.01515381 | -1.56118556 | 0.118501022 | 0.24419406  | -5.8069899  | ns |
| EDAR       | -0.03190144 | 0.052893438 | -1.55886089 | 0.119049931 | 0.245152185 | -5.82163352 | ns |
| TCTN3      | 0.009509061 | -0.02225449 | 1.558252634 | 0.119193804 | 0.245255349 | -5.82663072 | ns |
| GCLM       | -0.01464293 | 0.058291975 | -1.55794216 | 0.119268012 | 0.245255349 | -5.81254454 | ns |
| BAG6       | -0.01238603 | 0.019409766 | -1.55660706 | 0.119584812 | 0.245657778 | -5.81631604 | ns |
| LRG1       | -0.00805493 | -0.00069428 | -1.55574172 | 0.119789946 | 0.245657778 | -5.83020668 | ns |
| NFAT5      | -0.02809414 | 0.141869548 | -1.55566126 | 0.119809711 | 0.245657778 | -5.81553032 | ns |
| ATP5PO     | -0.0137749  | -0.00259435 | -1.55542733 | 0.119865331 | 0.245657778 | -5.81810485 | ns |
| FCGR3B     | -0.01704608 | -0.04711524 | -1.55534609 | 0.119884361 | 0.245657778 | -5.82432969 | ns |
| RNASE3     | -0.03771071 | 0.064748747 | -1.55478044 | 0.120019129 | 0.245761469 | -5.82357323 | ns |
| SESTD1     | -0.02196378 | 0.061696307 | -1.55407055 | 0.120188591 | 0.245772746 | -5.82019753 | ns |
| CCL11      | -0.01315062 | -0.02863414 | -1.55396871 | 0.120212256 | 0.245772746 | -5.83413354 | ns |
| FGF3       | 0.00980226  | 0.022298657 | 1.553699576 | 0.120277142 | 0.245772746 | -5.81855575 | ns |
| IL3RA      | -0.01065415 | -0.01526634 | -1.55015417 | 0.121125466 | 0.247165135 | -5.82623995 | ns |
| YWHAQ      | -0.02344299 | 0.026547805 | -1.55014403 | 0.121127845 | 0.247165135 | -5.82634889 | ns |
| CPPED1     | -0.0232353  | -0.01339715 | -1.54966751 | 0.121241746 | 0.24722479  | -5.84079359 | ns |
| CKMT1A_CKM | -0.02319597 | -0.0308338  | -1.54914617 | 0.12136732  | 0.247308147 | -5.83251575 | ns |
| TPSAB1     | -0.01788833 | -0.03114601 | -1.54673738 | 0.121946998 | 0.248305838 | -5.84467224 | ns |
| ICAM3      | -0.00865733 | -0.01010071 | -1.54640573 | 0.122027013 | 0.248305838 | -5.8453348  | ns |
| NUBP1      | -0.0319633  | 0.132931119 | -1.54557979 | 0.122226566 | 0.2485387   | -5.84516862 | ns |
| DAAM1      | -0.02635258 | 0.022401802 | -1.54505479 | 0.122353905 | 0.248624497 | -5.83416238 | ns |
| CDC123     | 0.020743284 | 0.071682469 | 1.543883427 | 0.122637638 | 0.24902775  | -5.83249928 | ns |
| FAM172A    | -0.01949985 | 0.025463418 | -1.53892584 | 0.123843387 | 0.251301382 | -5.84258303 | ns |
| PRUNE2     | -0.00926772 | 0.013648507 | -1.53671188 | 0.124384603 | 0.252224334 | -5.85191972 | ns |
| MCEE       | -0.01354211 | 0.031594142 | -1.53634189 | 0.124474931 | 0.252232338 | -5.86118937 | ns |
| TOP1       | 0.035441221 | -0.06258099 | 1.53290045  | 0.125320843 | 0.253620193 | -5.86436637 | ns |
| PCSK7      | -0.01437508 | 0.031842952 | -1.53284899 | 0.125333541 | 0.253620193 | -5.86461203 | ns |
| KLB        | -0.02506467 | 0.004789808 | -1.53064555 | 0.12587801  | 0.25454556  | -5.85604004 | ns |
| ARHGEF1    | -0.02839435 | -0.03548987 | -1.52796318 | 0.126542086 | 0.255583067 | -5.87295435 | ns |
| JPT2       | -0.02744895 | -0.03595741 | -1.52786652 | 0.126566135 | 0.255583067 | -5.87201044 | ns |
| KLK7       | -0.01226715 | -0.00131242 | -1.52733472 | 0.126699234 | 0.255675026 | -5.84854071 | ns |
| M6PR       | -0.0124859  | 0.065963534 | -1.52346083 | 0.127664424 | 0.257444834 | -5.86607443 | ns |
| CXCL8      | -0.02248488 | -0.00524954 | -1.5227136  | 0.127851063 | 0.257643274 | -5.87531884 | ns |
| CANT1      | -0.00663737 | -0.01148163 | -1.52012603 | 0.128499958 | 0.258423104 | -5.87853708 | ns |
| CCL8       | -0.02051638 | -0.08009675 | -1.51982935 | 0.128574267 | 0.258423104 | -5.88627186 | ns |
| ADAMTS1    | -0.00970798 | -0.00245939 | -1.51954129 | 0.128647331 | 0.258423104 | -5.87062501 | ns |
| CNTF       | -0.01065477 | -0.00629605 | -1.51952663 | 0.128650956 | 0.258423104 | -5.87296541 | ns |
| PVALB      | -0.03828233 | -0.19307949 | -1.519407   | 0.128680546 | 0.258423104 | -5.88541077 | ns |
| GPKOW      | -0.00958512 | -0.00350804 | -1.51873399 | 0.128850447 | 0.258586463 | -5.87405716 | ns |
| VAV3       | -0.03123709 | 0.016715733 | -1.51791032 | 0.129057974 | 0.258825057 | -5.87540064 | ns |
| CA6        | 0.021331533 | 0.055544365 | 1.515858624 | 0.129575747 | 0.259685093 | -5.88588338 | ns |
| APBB1IP    | -0.01567576 | 0.008427928 | -1.51527049 | 0.129724578 | 0.259805054 | -5.88540445 | ns |
| STAM       | -0.01166568 | 0.041060788 | -1.51378329 | 0.130101267 | 0.260380877 | -5.89342989 | ns |
| SH3GL3     | -0.02687934 | -0.01478156 | -1.51308546 | 0.130278785 | 0.26055757  | -5.88421802 | ns |
| ERP44      | -0.00868277 | -0.00243641 | -1.51252988 | 0.130419808 | 0.260661081 | -5.88883671 | ns |
| FKBP4      | -0.01477424 | -0.02131707 | -1.51071012 | 0.130883014 | 0.261407936 | -5.89190703 | ns |
| COL24A1    | -0.01690749 | -0.05964221 | -1.50850486 | 0.131445795 | 0.26235251  | -5.90117704 | ns |
| MYH7B      | 0.013425215 | 0.05545574  | 1.506899767 | 0.131857377 | 0.262994222 | -5.88846251 | ns |
| STIP1      | -0.02213917 | 0.019212221 | -1.5061028  | 0.132061388 | 0.263221333 | -5.90115203 | ns |
| CLNS1A     | 0.010644348 | 0.035504115 | 1.505094093 | 0.132320782 | 0.263558448 | -5.89429596 | ns |
| FNDC1      | -0.0143562  | -0.03292912 | -1.50429961 | 0.132524614 | 0.263784508 | -5.90855377 | ns |
| GIPR       | 0.01376616  | 0.022491418 | 1.502527781 | 0.132981861 | 0.264514327 | -5.89612788 | ns |
| TTF2       | -0.01529545 | 0.04208929  | -1.50118915 | 0.133327533 | 0.265021373 | -5.90011901 | ns |
| GRSF1      | -0.02498605 | 0.073775296 | -1.50030808 | 0.133555755 | 0.265263353 | -5.89532386 | ns |
| SERPINA3   | -0.00440561 | -0.00450974 | -1.50001511 | 0.133630956 | 0.265263353 | -5.91276932 | ns |
| PTX3       | -0.01638222 | -0.07781515 | -1.49694446 | 0.134428278 | 0.266664791 | -5.91549745 | ns |
| VSTM2B     | -0.01311506 | 0.074227913 | -1.49538326 | 0.134835117 | 0.267290252 | -5.9140833  | ns |
| GGCT       | -0.01495717 | 0.019026555 | -1.49480502 | 0.134985747 | 0.267407313 | -5.9219967  | ns |
| CREB3      | -0.01684743 | 0.072483621 | -1.49323875 | 0.135395702 | 0.268037593 | -5.90879114 | ns |
| CSF2       | -0.01115615 | 0.012711188 | -1.4920979  | 0.135694467 | 0.268447049 | -5.91215772 | ns |

|           |             |             |             |             |             |             |    |
|-----------|-------------|-------------|-------------|-------------|-------------|-------------|----|
| RPE       | -0.0222592  | 0.079024553 | -1.48885378 | 0.136546533 | 0.269949815 | -5.92374951 | ns |
| ANP32C    | -0.01271809 | 0.067964884 | -1.4884496  | 0.136653278 | 0.26997806  | -5.91838031 | ns |
| ADCYAP1R1 | 0.011142071 | 0.027351203 | 1.486316923 | 0.137216271 | 0.270907039 | -5.92150346 | ns |
| CALCOCO1  | -0.03442348 | 0.011091652 | -1.48557174 | 0.13741282  | 0.27092976  | -5.9359987  | ns |
| IDS       | 0.002867642 | -0.00462316 | 1.485569406 | 0.137413348 | 0.27092976  | -5.93728168 | ns |
| PDAP1     | -0.02972931 | -0.03326092 | -1.48419786 | 0.137776788 | 0.271463038 | -5.93841287 | ns |
| CSF1R     | -0.01187332 | 0.001406766 | -1.4804608  | 0.138770668 | 0.273201079 | -5.94274269 | ns |
| EPCAM     | 0.032488568 | 0.117250887 | 1.480161679 | 0.138850657 | 0.273201079 | -5.93836422 | ns |
| TP73      | -0.01039245 | -0.00385965 | -1.47982952 | 0.13893959  | 0.273201079 | -5.93170288 | ns |
| CEACAM3   | -0.01507964 | 0.01329305  | -1.4769849  | 0.139700619 | 0.274512657 | -5.93522032 | ns |
| TIE1      | -0.01355908 | -0.07811984 | -1.47545267 | 0.140111183 | 0.275134266 | -5.95171116 | ns |
| B3GNT7    | -0.01094825 | -0.0376696  | -1.47302326 | 0.140765638 | 0.276233644 | -5.94104103 | ns |
| GLOD4     | -0.01172035 | -0.01595977 | -1.47081177 | 0.1413626   | 0.2772188   | -5.95124999 | ns |
| RBPMS     | -0.01992372 | 0.131082483 | -1.47005038 | 0.141569035 | 0.277437304 | -5.94401377 | ns |
| CD28      | -0.0114941  | 0.002871527 | -1.46932226 | 0.141766316 | 0.277637587 | -5.94641883 | ns |
| TAB2      | -0.03264342 | 0.011923119 | -1.46826976 | 0.142051564 | 0.278009763 | -5.95394521 | ns |
| CFP       | -0.00692487 | -0.0121674  | -1.46711158 | 0.142366    | 0.278438526 | -5.96312753 | ns |
| PQBP1     | -0.01866141 | 0.044443246 | -1.46596847 | 0.142677778 | 0.278861521 | -5.95130187 | ns |
| GOLGA3    | -0.02331992 | 0.05655925  | -1.46529991 | 0.142859364 | 0.279029661 | -5.96698747 | ns |
| BCL7B     | -0.0140472  | 0.057095201 | -1.46411242 | 0.14318358  | 0.279475971 | -5.96681418 | ns |
| IL1RL2    | -0.01254627 | -0.01005191 | -1.46231964 | 0.143674441 | 0.280246738 | -5.95748883 | ns |
| NADK      | -0.01762777 | 0.003413089 | -1.4610092  | 0.144033441 | 0.280759444 | -5.96596445 | ns |
| TCL1B     | -0.02532835 | 0.143829201 | -1.46018666 | 0.144259633 | 0.280914898 | -5.96060113 | ns |
| BCAT2     | -0.01659282 | 0.087976137 | -1.46001932 | 0.144305598 | 0.280914898 | -5.96091414 | ns |
| ARFIP1    | -0.0207429  | 0.050202676 | -1.4586034  | 0.144694529 | 0.281484359 | -5.97670192 | ns |
| IL7       | -0.02071273 | 0.010567027 | -1.4570211  | 0.145131019 | 0.282145524 | -5.97400393 | ns |
| CDC27     | -0.01952706 | 0.075676815 | -1.45470184 | 0.145772688 | 0.283204423 | -5.96762417 | ns |
| SNRPB2    | -0.01317863 | 0.03765377  | -1.45395453 | 0.145979161 | 0.283416987 | -5.98244479 | ns |
| PFKFB2    | -0.02478578 | 0.001772355 | -1.45167329 | 0.14661301  | 0.284458464 | -5.97832435 | ns |
| UBXN1     | -0.02067087 | 0.028770496 | -1.44992986 | 0.147098786 | 0.284911978 | -5.97548039 | ns |
| PDIA4     | -0.01807384 | 0.038371811 | -1.44980111 | 0.147134245 | 0.284911978 | -5.98792624 | ns |
| SFTPA1    | -0.01798107 | 0.089518938 | -1.44962063 | 0.147185186 | 0.284911978 | -5.97494427 | ns |
| ENPEP     | 0.013001191 | 0.057241602 | 1.44943456  | 0.147237124 | 0.284911978 | -5.9744059  | ns |
| CD3D      | -0.00969824 | 0.032253359 | -1.44908509 | 0.147334619 | 0.284911978 | -5.97669242 | ns |
| FOS       | 0.010672175 | -0.02025912 | 1.448643733 | 0.147458023 | 0.284961898 | -5.97244064 | ns |
| CPB2      | 0.006705482 | -0.01355439 | 1.447908116 | 0.14766303  | 0.285169344 | -5.98929511 | ns |
| OSBPL2    | -0.01139402 | 0.06493277  | -1.44556269 | 0.148320115 | 0.286248998 | -5.99451693 | ns |
| MST1      | -0.01958244 | -0.17445556 | -1.44357273 | 0.148879785 | 0.286995605 | -5.98878083 | ns |
| ILKAP     | -0.01842166 | 0.019983732 | -1.44348919 | 0.148903542 | 0.286995605 | -5.98386896 | ns |
| NAGA      | -0.0176015  | 0.083597461 | -1.44110855 | 0.149574886 | 0.288099384 | -5.98486772 | ns |
| SCN2A     | -0.01390949 | 0.04412435  | -1.43814816 | 0.150412774 | 0.28952228  | -5.99235597 | ns |
| CD1C      | -0.00740094 | -0.00175217 | -1.43704179 | 0.150726387 | 0.289934815 | -6.00443848 | ns |
| CD163     | -0.0137959  | -0.02174901 | -1.43616374 | 0.150976129 | 0.290060278 | -6.00311551 | ns |
| ACRV1     | -0.02177385 | 0.3736473   | -1.4361155  | 0.150990282 | 0.290060278 | -5.99293108 | ns |
| TXNDC15   | -0.00836671 | 0.000448018 | -1.43528386 | 0.151226486 | 0.290323037 | -6.00694356 | ns |
| PPP1R14D  | -0.01100219 | 0.021593085 | -1.43415195 | 0.15154905  | 0.290751134 | -6.01179528 | ns |
| GSAP      | -0.0278588  | 0.246874791 | -1.43317099 | 0.15182976  | 0.291098424 | -5.99846637 | ns |
| LPA       | 0.05274661  | -0.13674861 | 1.430854572 | 0.152492585 | 0.292177395 | -6.00180553 | ns |
| CD2AP     | -0.02018735 | 0.014470425 | -1.42947296 | 0.152888746 | 0.292659348 | -6.01118528 | ns |
| LAMTOR5   | -0.01212508 | 0.028809154 | -1.42927796 | 0.152944577 | 0.292659348 | -6.01681896 | ns |
| TNFSF12   | 0.008922687 | 0.020499813 | 1.427987232 | 0.153315639 | 0.293177254 | -6.02051916 | ns |
| CHAC2     | 0.018737924 | 0.03139876  | 1.427165954 | 0.153552822 | 0.293399375 | -6.00698638 | ns |
| AP3S2     | -0.01395889 | 0.074404045 | -1.42658746 | 0.153718983 | 0.293399375 | -6.02155632 | ns |
| TANK      | -0.0218542  | 0.03529172  | -1.42653987 | 0.153733234 | 0.293399375 | -6.00876038 | ns |
| ANXA4     | -0.02244523 | 0.023679777 | -1.4258885  | 0.153921021 | 0.293565892 | -6.01433896 | ns |
| OTUD6B    | -0.01718895 | 0.022561018 | -1.42423087 | 0.154399831 | 0.293831099 | -6.02379641 | ns |
| CTHRC1    | -0.00812465 | -0.02702126 | -1.42394339 | 0.154483013 | 0.293831099 | -6.02479322 | ns |
| IFIT3     | -0.01105699 | 0.031379092 | -1.42385506 | 0.154508871 | 0.293831099 | -6.01766758 | ns |
| PYDC1     | -0.0121046  | 0.02500071  | -1.42371466 | 0.154549781 | 0.293831099 | -6.0118907  | ns |
| ANKMY2    | -0.02362769 | 0.016214311 | -1.4236685  | 0.154563208 | 0.293831099 | -6.01058723 | ns |
| TNFAIP8   | -0.01109539 | 0.006146925 | -1.4211382  | 0.155297228 | 0.294873978 | -6.01639052 | ns |
| PDCD5     | -0.01869107 | -0.00980959 | -1.42101951 | 0.155331196 | 0.294873978 | -6.03040528 | ns |
| PSIP1     | -0.01979688 | 0.035757826 | -1.4206173  | 0.155448365 | 0.294873978 | -6.02597451 | ns |
| STEAP4    | 0.021341494 | 0.136177115 | 1.420386979 | 0.155515728 | 0.294873978 | -6.01754026 | ns |
| SORBS1    | -0.01152938 | 0.031570506 | -1.41905839 | 0.155902073 | 0.2954147   | -6.03316189 | ns |
| GPC5      | 0.017446324 | 0.023330055 | 1.418434687 | 0.156084302 | 0.295568199 | -6.02599142 | ns |



|          |             |             |             |             |             |             |    |
|----------|-------------|-------------|-------------|-------------|-------------|-------------|----|
| CRX      | -0.0341526  | 0.339559902 | -1.41751728 | 0.156352427 | 0.295884048 | -6.02150928 | ns |
| PSAPL1   | -0.01421867 | 0.009602024 | -1.41668028 | 0.156596571 | 0.296154136 | -6.03443869 | ns |
| MDGA1    | -0.02182544 | -0.03926383 | -1.414859   | 0.157130233 | 0.296971056 | -6.03101723 | ns |
| CLECSA   | -0.00872094 | -0.01994965 | -1.41305565 | 0.157659778 | 0.297727926 | -6.03222693 | ns |
| MAP1LC3A | -0.00904774 | -0.01068705 | -1.41261711 | 0.157788975 | 0.297727926 | -6.02845909 | ns |
| CD226    | -0.01199367 | 0.018159776 | -1.41245549 | 0.157836585 | 0.297727926 | -6.02636138 | ns |
| RPA2     | -0.00896922 | 0.022340899 | -1.41094259 | 0.158282232 | 0.298375801 | -6.02848014 | ns |
| KLK1     | 0.039451413 | 0.43172829  | 1.409904516 | 0.158588277 | 0.298609489 | -6.0374975  | ns |
| CDHR1    | -0.01311494 | 0.027509691 | -1.40982932 | 0.158610725 | 0.298609489 | -6.03225903 | ns |
| HRG      | -0.0092035  | -0.0149451  | -1.40840345 | 0.15903184  | 0.299209389 | -6.04340355 | ns |
| TACSTD2  | 0.009553196 | 0.012061232 | 1.407046513 | 0.159436209 | 0.299777031 | -5.99074911 | ns |
| FCAR     | -0.0146939  | -0.03028272 | -1.40503927 | 0.160029844 | 0.300576696 | -6.0478123  | ns |
| TP53I3   | -0.01540975 | -0.00374249 | -1.40491554 | 0.160067385 | 0.300576696 | -6.02732432 | ns |
| IL13RA2  | -0.00817412 | -0.01318803 | -1.40321405 | 0.160573612 | 0.30114747  | -6.04159294 | ns |
| RRM2     | -0.0156445  | 0.037135017 | -1.40320081 | 0.160577606 | 0.30114747  | -6.04063221 | ns |
| RAPGEF2  | -0.01528182 | 0.06697825  | -1.40268653 | 0.160730671 | 0.301195107 | -6.04734984 | ns |
| ANGPTL4  | -0.01404979 | -0.05190204 | -1.40238066 | 0.160821786 | 0.301195107 | -6.05153643 | ns |
| IDI2     | -0.01427127 | 0.025150723 | -1.40207834 | 0.160912455 | 0.301195107 | -6.04307022 | ns |
| AHCY     | -0.02071597 | -0.01930193 | -1.40084587 | 0.16128044  | 0.301690508 | -6.05138043 | ns |
| KLK14    | -0.01417036 | 0.00705239  | -1.40025161 | 0.161457976 | 0.30182925  | -6.06010952 | ns |
| LAMP1    | 0.008027222 | 0.021496303 | 1.398557486 | 0.161966346 | 0.302585879 | -6.04645315 | ns |
| EPN1     | -0.01249491 | 0.069220627 | -1.39750621 | 0.162281706 | 0.30298119  | -6.05454591 | ns |
| MAN2B2   | -0.01697754 | -0.06338169 | -1.39572046 | 0.162818698 | 0.303789519 | -6.06483267 | ns |
| DNAJA4   | 0.020883301 | 0.047081841 | 1.3951634   | 0.16298656  | 0.303908529 | -6.06554952 | ns |
| ITGB7    | -0.01399752 | 0.023779023 | -1.39388564 | 0.163372099 | 0.304433011 | -6.06893481 | ns |
| LPL      | 0.014655943 | 0.009287675 | 1.392853738 | 0.163684251 | 0.304820162 | -6.06245698 | ns |
| CLECS4M  | 0.013778635 | 0.040276335 | 1.390881301 | 0.16428145  | 0.305737307 | -6.07000109 | ns |
| MFGE8    | -0.01319499 | -0.00135325 | -1.39015732 | 0.164501243 | 0.305951357 | -6.06882928 | ns |
| ARF6     | -0.03052252 | -0.07728748 | -1.38898693 | 0.164856728 | 0.306417343 | -6.07298737 | ns |
| GALNT3   | -0.01295547 | 0.001683694 | -1.3862349  | 0.165695649 | 0.307749134 | -6.06499569 | ns |
| GUK1     | -0.01210129 | 0.021779593 | -1.38594572 | 0.165784037 | 0.307749134 | -6.06369764 | ns |
| COMP     | 0.010302102 | -0.03413648 | 1.384229607 | 0.166308602 | 0.308526758 | -6.06850968 | ns |
| FIS1     | -0.02347627 | 0.041544459 | -1.38138776 | 0.167179904 | 0.309946234 | -6.07894534 | ns |
| IL3      | 0.017051382 | -0.06562363 | 1.38072632  | 0.167383666 | 0.310127096 | -6.06917886 | ns |
| VASP     | -0.02039797 | 0.021510264 | -1.37921607 | 0.16784807  | 0.310748816 | -6.0863858  | ns |
| ACE2     | -0.01443171 | 0.018380216 | -1.37894538 | 0.167932066 | 0.310748816 | -6.07501451 | ns |
| FAP      | 0.008037747 | -0.00573277 | 1.378474254 | 0.168076792 | 0.310819654 | -6.08902829 | ns |
| ENPP2    | -0.00795228 | 0.021937929 | -1.37733407 | 0.16842886  | 0.31127359  | -6.09058725 | ns |
| SAA4     | -0.00919106 | 0.03625041  | -1.37562779 | 0.168956784 | 0.312051746 | -6.09215532 | ns |
| LEG1     | 0.019078584 | 0.056077238 | 1.373560137 | 0.169599292 | 0.313040412 | -6.06595461 | ns |
| RAB33A   | -0.01905465 | 0.04945868  | -1.37284907 | 0.169819753 | 0.313249323 | -6.0816196  | ns |
| SERPINB5 | -0.01430783 | -0.03698574 | -1.36967399 | 0.170809103 | 0.314875367 | -6.0876554  | ns |
| COPB2    | -0.01213135 | 0.014551357 | -1.36864022 | 0.171132219 | 0.315113871 | -6.08734303 | ns |
| TMED1    | -0.01525588 | 0.028285274 | -1.36856856 | 0.171154315 | 0.315113871 | -6.09425414 | ns |
| CD22     | -0.01243266 | -0.00931444 | -1.36527252 | 0.172187187 | 0.316658652 | -6.10743382 | ns |
| GPRC5C   | -0.01529138 | 0.065085458 | -1.36498642 | 0.172277194 | 0.316658652 | -6.10594829 | ns |
| IL7R     | 0.015938773 | 0.016943953 | 1.364625853 | 0.172390653 | 0.316658652 | -6.10372285 | ns |
| ATP6V1F  | -0.02011544 | 0.046970394 | -1.36451125 | 0.172427143 | 0.316658652 | -6.09332297 | ns |
| BHMT2    | -0.00720232 | -0.01491583 | -1.36384888 | 0.172635554 | 0.316842124 | -6.09383718 | ns |
| PLAU     | -0.00840295 | -0.0023092  | -1.36201597 | 0.173212808 | 0.31745804  | -6.10725333 | ns |
| MAPKAPK2 | -0.02067353 | 0.020175084 | -1.36175032 | 0.173296789 | 0.31745804  | -6.10348922 | ns |
| CDK5RAP3 | -0.01668908 | 0.097683472 | -1.36174765 | 0.1732973   | 0.31745804  | -6.11223332 | ns |
| GET3     | -0.01574301 | 0.09234847  | -1.35975203 | 0.1739282   | 0.318414008 | -6.11400549 | ns |
| IL11     | 0.01917764  | 0.099355037 | 1.358639186 | 0.174281238 | 0.318745179 | -6.10256925 | ns |
| TPM3     | 0.012061534 | 0.046215884 | 1.358493861 | 0.174327415 | 0.318745179 | -6.10106839 | ns |
| NFATC1   | -0.02917686 | 0.017820846 | -1.35772654 | 0.174570439 | 0.318989789 | -6.11266102 | ns |
| TIGIT    | -0.00998164 | 0.007857633 | -1.35712405 | 0.174761862 | 0.319024228 | -6.10972908 | ns |
| MYL1     | 0.011181323 | 0.036114753 | 1.356980455 | 0.174807796 | 0.319024228 | -6.10310688 | ns |
| ATP1B2   | -0.008659   | 0.018758175 | -1.35653008 | 0.174950943 | 0.319086043 | -6.10371307 | ns |
| S100A3   | -0.01214268 | 0.060646191 | -1.35530851 | 0.175339096 | 0.319492442 | -6.11900999 | ns |
| CHMP1A   | -0.02364439 | -0.05802189 | -1.35514127 | 0.175392598 | 0.319492442 | -6.11307901 | ns |
| SSC4D    | -0.03641596 | 0.095505149 | -1.35388053 | 0.175794515 | 0.319973712 | -6.11496681 | ns |
| AFAP1    | 0.02356192  | 0.1946143   | 1.353625895 | 0.175875961 | 0.319973712 | -6.10940796 | ns |
| C1S      | -0.00587869 | -0.01995883 | -1.35281949 | 0.176133045 | 0.3202419   | -6.1230309  | ns |
| HSPB1    | -0.02652914 | 0.031978279 | -1.34964164 | 0.177151224 | 0.321883241 | -6.1137913  | ns |
| EGF      | -0.03094415 | -0.08533551 | -1.34931354 | 0.177256251 | 0.321883241 | -6.12158939 | ns |

|             |             |             |             |             |             |             |    |
|-------------|-------------|-------------|-------------|-------------|-------------|-------------|----|
| EFHD1       | -0.00929271 | -0.0017446  | -1.34857495 | 0.177493206 | 0.322113214 | -6.12994712 | ns |
| INPP1       | -0.01600711 | 0.027317281 | -1.34796906 | 0.177688292 | 0.322266965 | -6.12304122 | ns |
| PRDX6       | 0.017802403 | 0.071347133 | 1.33881969  | 0.180648988 | 0.327161787 | -6.14359603 | ns |
| TSHB        | 0.022815454 | 0.028700225 | 1.338721856 | 0.180681118 | 0.327161787 | -6.13581223 | ns |
| HTR1B       | -0.01182995 | 0.067602951 | -1.33859335 | 0.180723275 | 0.327161787 | -6.12948053 | ns |
| CTAG1A_CTAG | -0.01388205 | 0.01151326  | -1.3375696  | 0.181056756 | 0.327562408 | -6.13443759 | ns |
| RYR1        | -0.00957629 | 0.028298676 | -1.3358605  | 0.181615097 | 0.328369093 | -6.13131746 | ns |
| NAGPA       | 0.005821203 | -0.00723809 | 1.335085635 | 0.181868387 | 0.328623571 | -6.13413552 | ns |
| FRMD7       | 0.008955584 | -0.00560272 | 1.332006363 | 0.182878181 | 0.330243839 | -6.13788275 | ns |
| KRT6C       | -0.01037397 | 0.040945078 | -1.33131326 | 0.183106147 | 0.330451144 | -6.13733348 | ns |
| JUN         | -0.01533196 | 0.052226357 | -1.32982253 | 0.183596828 | 0.33093303  | -6.14099903 | ns |
| IFT20       | -0.01225824 | 0.054336889 | -1.32981338 | 0.183599832 | 0.33093303  | -6.14077831 | ns |
| DSG4        | 0.014685177 | 0.019924538 | 1.329136743 | 0.183822723 | 0.331130383 | -6.14688519 | ns |
| CETN2       | -0.01981269 | 0.059669333 | -1.32847332 | 0.184041911 | 0.331320826 | -6.14276594 | ns |
| RAB6B       | -0.01354718 | 0.037101954 | -1.32535738 | 0.185072742 | 0.332687093 | -6.14686783 | ns |
| GIT1        | -0.02683796 | 0.003260664 | -1.32521487 | 0.185120033 | 0.332687093 | -6.14482982 | ns |
| STAB2       | -0.00797225 | -0.03118137 | -1.32514491 | 0.185142646 | 0.332687093 | -6.15954761 | ns |
| CLPS        | -0.01983338 | 0.003085875 | -1.32433231 | 0.185412444 | 0.332966996 | -6.15642289 | ns |
| SEZ6        | -0.00837387 | 0.016932741 | -1.32356764 | 0.185666697 | 0.333218657 | -6.14899893 | ns |
| CASP1       | -0.01982657 | -0.00098782 | -1.32211724 | 0.186149184 | 0.333879372 | -6.15112301 | ns |
| SLC27A4     | -0.01960564 | 0.076762618 | -1.32133735 | 0.186408967 | 0.334140075 | -6.15214565 | ns |
| VTCN1       | -0.00875902 | 0.000449847 | -1.31891249 | 0.187218447 | 0.335385193 | -6.15444378 | ns |
| GNPMB       | 0.008119397 | -0.01349286 | 1.318102886 | 0.187489511 | 0.33566485  | -6.14984307 | ns |
| IDO1        | -0.01718645 | 0.01788566  | -1.31766589 | 0.187635538 | 0.335720448 | -6.15609799 | ns |
| GID8        | -0.00902534 | 0.040262802 | -1.31417727 | 0.188805975 | 0.337607745 | -6.1753912  | ns |
| PSMA1       | -0.01373681 | 0.049360822 | -1.31339692 | 0.189069269 | 0.337871644 | -6.16164563 | ns |
| WASL        | 0.015387003 | 0.092964813 | 1.30902075  | 0.190547328 | 0.340304708 | -6.16598997 | ns |
| CLSTN1      | -0.01485125 | 0.03174935  | -1.3066304  | 0.191358209 | 0.341478184 | -6.17131756 | ns |
| CHEK2       | -0.00930435 | -0.00418134 | -1.30639478 | 0.191438283 | 0.341478184 | -6.17165542 | ns |
| CACNA1H     | 0.015482437 | 0.101908115 | 1.305788121 | 0.191644603 | 0.341627079 | -6.17072263 | ns |
| TSPAN1      | -0.0158774  | 0.154218891 | -1.30546131 | 0.191755747 | 0.341627079 | -6.17286483 | ns |
| CST6        | -0.01358011 | -0.00076379 | -1.30494123 | 0.19193301  | 0.341734383 | -6.16668863 | ns |
| PLAT        | -0.0153784  | -0.09331766 | -1.30442982 | 0.192106506 | 0.341834856 | -6.18550678 | ns |
| BRD2        | -0.00917048 | 0.017556094 | -1.30383263 | 0.19231056  | 0.341989547 | -6.17504375 | ns |
| ARAF        | -0.0179795  | 0.068298952 | -1.30291617 | 0.192623034 | 0.342336737 | -6.18126234 | ns |
| DSG3        | -0.00955628 | -0.00361557 | -1.30188194 | 0.192976154 | 0.3427557   | -6.18966939 | ns |
| HEPACAM2    | 0.011101679 | 0.026025487 | 1.296532891 | 0.194811257 | 0.345450209 | -6.19726809 | ns |
| SSH3        | -0.00795003 | 0.020138762 | -1.29647906 | 0.194830403 | 0.345450209 | -6.18105425 | ns |
| ACADSB      | -0.02328282 | 0.063970581 | -1.29642588 | 0.194848115 | 0.345450209 | -6.19746035 | ns |
| SLC12A2     | -0.00703395 | 0.01478247  | -1.29577653 | 0.19507238  | 0.345637955 | -6.18364224 | ns |
| IL10        | -0.02319868 | 0.056158783 | -1.29418097 | 0.195622702 | 0.346402844 | -6.18739114 | ns |
| NUP50       | 0.008580347 | 0.034373407 | 1.293265922 | 0.195938976 | 0.346752612 | -6.1868665  | ns |
| ZNRF4       | -0.01438567 | 0.023850275 | -1.28758977 | 0.197908088 | 0.350025207 | -6.20780621 | ns |
| CEP43       | -0.01924893 | 0.019300825 | -1.28693504 | 0.198136828 | 0.35020255  | -6.19405477 | ns |
| CBLN4       | 0.008722406 | -0.00472011 | 1.286613507 | 0.198248224 | 0.35020255  | -6.21160186 | ns |
| PECAM1      | -0.00851722 | -0.00117818 | -1.28574484 | 0.198551497 | 0.350526222 | -6.20744352 | ns |
| CELA2A      | -0.01538652 | 0.010258095 | -1.28310811 | 0.199473407 | 0.351940996 | -6.21394634 | ns |
| GSTM4       | -0.01903563 | 0.149705727 | -1.28140985 | 0.200069513 | 0.352779576 | -6.20200826 | ns |
| DCTN6       | -0.02016659 | 0.086028779 | -1.2791489  | 0.200864323 | 0.353967304 | -6.20656732 | ns |
| FGFBP3      | -0.00954274 | -0.01857842 | -1.27845833 | 0.201107012 | 0.354181228 | -6.22035988 | ns |
| NCAN        | -0.01091491 | 0.031964853 | -1.27797483 | 0.201277432 | 0.354267693 | -6.2219586  | ns |
| SLC9A3R2    | -0.01321678 | 0.062944497 | -1.27520564 | 0.202255624 | 0.355519893 | -6.22338452 | ns |
| DXO         | -0.01192791 | 0.016189572 | -1.27494519 | 0.202347754 | 0.355519893 | -6.22481059 | ns |
| KIR2DL3     | -0.0212596  | 0.005696045 | -1.27492881 | 0.202354131 | 0.355519893 | -6.21103548 | ns |
| TXNDC9      | -0.0137978  | 0.074873574 | -1.27393913 | 0.20270409  | 0.355920592 | -6.22608289 | ns |
| THSD1       | -0.00882731 | 0.00957023  | -1.27279321 | 0.203111298 | 0.356368398 | -6.2084965  | ns |
| LY9         | -0.00804657 | -0.01034892 | -1.27253326 | 0.203203213 | 0.356368398 | -6.21713268 | ns |
| RTBDN       | -0.00805041 | 0.002371294 | -1.27194465 | 0.203412122 | 0.356520645 | -6.22185239 | ns |
| FAM3B       | -0.00976414 | -0.03352769 | -1.27103466 | 0.203735644 | 0.356749378 | -6.22300041 | ns |
| PMCH        | -0.0213734  | 0.231961657 | -1.27089134 | 0.203786974 | 0.356749378 | -6.21532506 | ns |
| CLGN        | -0.01130684 | 0.023910683 | -1.2685877  | 0.20460769  | 0.357971513 | -6.21969379 | ns |
| BLOC1S3     | -0.01069329 | 0.066570655 | -1.26802745 | 0.204807192 | 0.358105989 | -6.23353871 | ns |
| CD82        | -0.01095027 | 0.063498084 | -1.26750674 | 0.204993485 | 0.358217222 | -6.22641509 | ns |
| ITGAM       | 0.008654257 | 0.011571648 | 1.265415467 | 0.205741617 | 0.359309522 | -6.23317422 | ns |
| FSHB        | -0.01704642 | 0.487550514 | -1.26491923 | 0.205919831 | 0.359405802 | -6.22367019 | ns |
| STAMPB      | -0.01820692 | 0.012628826 | -1.26351792 | 0.206422445 | 0.359903301 | -6.23081868 | ns |

|          |             |              |             |             |             |             |    |
|----------|-------------|--------------|-------------|-------------|-------------|-------------|----|
| KIR3DL1  | -0.03403277 | 8.5951209784 | -1.26316003 | 0.206551254 | 0.359903301 | -6.22585242 | ns |
| CHM      | -0.0157875  | 0.04361748   | -1.26309469 | 0.206574634 | 0.359903301 | -6.22659212 | ns |
| ZHX2     | -0.00879798 | 0.027861721  | -1.26217961 | 0.206903155 | 0.360260712 | -6.24087992 | ns |
| TFF2     | -0.01524081 | -0.01632929  | -1.26100022 | 0.207327891 | 0.360785127 | -6.23834887 | ns |
| POMC     | -0.01786022 | -0.02480853  | -1.25991764 | 0.207718576 | 0.361161151 | -6.22993435 | ns |
| EPPK1    | -0.0187832  | 0.027879247  | -1.25971595 | 0.207791347 | 0.361161151 | -6.23018642 | ns |
| CPXM1    | -0.01898916 | -0.0013521   | -1.2583127  | 0.208297723 | 0.361698264 | -6.24344236 | ns |
| PGLYRP4  | -0.01607847 | 0.107113057  | -1.25817474 | 0.20834811  | 0.361698264 | -6.23127818 | ns |
| MUCL3    | 0.01165482  | 0.075296659  | 1.257684385 | 0.208525471 | 0.361791072 | -6.23020415 | ns |
| FMR1     | -0.00929435 | -0.00868669  | -1.25071268 | 0.211058777 | 0.365823516 | -6.24137418 | ns |
| RAB3GAP1 | -0.01490554 | 0.078988306  | -1.25059902 | 0.211100214 | 0.365823516 | -6.24249754 | ns |
| DNAJB8   | 0.015425528 | 0.109921576  | 1.249669583 | 0.211439685 | 0.366174982 | -6.24357935 | ns |
| NEDD9    | -0.0086283  | 0.020931097  | -1.24935739 | 0.211553834 | 0.366174982 | -6.241705   | ns |
| C9orf40  | 0.021260549 | 0.072596166  | 1.2485955   | 0.211831962 | 0.366439176 | -6.25670496 | ns |
| SPRING1  | -0.01601644 | 0.102760336  | -1.24800021 | 0.21205043  | 0.366599914 | -6.24224043 | ns |
| SOD1     | -0.01307785 | 0.008830319  | -1.2474864  | 0.212238715 | 0.366708312 | -6.24317826 | ns |
| OFD1     | -0.01671661 | 0.153501516  | -1.24662618 | 0.212553723 | 0.367035406 | -6.25245822 | ns |
| MAP2K1   | -0.01643965 | 0.02138386   | -1.24604444 | 0.212766958 | 0.367186475 | -6.25986242 | ns |
| ANPEP    | 0.007600079 | 0.002068346  | 1.245304416 | 0.213038916 | 0.36743865  | -6.25610013 | ns |
| ANGPTL2  | -0.01138683 | -0.03470297  | -1.24338378 | 0.21374541  | 0.36843955  | -6.2598597  | ns |
| FLT4     | -0.00940772 | -0.05505408  | -1.24220943 | 0.214178174 | 0.368967709 | -6.26342008 | ns |
| LMOD2    | -0.01645408 | 0.087807676  | -1.24099611 | 0.214626493 | 0.369522027 | -6.2543664  | ns |
| KIAA2013 | -0.01492085 | 0.130391587  | -1.24056905 | 0.214783828 | 0.369575002 | -6.26678597 | ns |
| CCL26    | -0.02444604 | 0.034622279  | -1.2388236  | 0.215429783 | 0.370468179 | -6.26583142 | ns |
| ANXA3    | -0.01919714 | -0.01449547  | -1.23671782 | 0.216210617 | 0.371592113 | -6.27258931 | ns |
| CCAR2    | 0.013864134 | 0.095377742  | 1.235424912 | 0.21669113  | 0.372198883 | -6.27403427 | ns |
| RAD23B   | -0.01223115 | 0.020030052  | -1.23301681 | 0.21758876  | 0.373520976 | -6.26317626 | ns |
| SERPIND1 | -0.00730117 | -0.03243131  | -1.23267124 | 0.217717192 | 0.373521858 | -6.2755431  | ns |
| RABEPK   | -0.0161949  | 0.093189341  | -1.23230882 | 0.217853007 | 0.373535397 | -6.26404208 | ns |
| CTSE     | -0.01307576 | 0.016807315  | -1.23125377 | 0.218247084 | 0.373991483 | -6.26631697 | ns |
| ADAM12   | -0.0087554  | 0.001891794  | -1.22904139 | 0.219075523 | 0.375190925 | -6.26668096 | ns |
| IZUMO1   | 0.012021957 | 0.059786932  | 1.228623456 | 0.219232263 | 0.375239277 | -6.2660442  | ns |
| COL9A2   | 0.011661178 | 0.034086214  | 1.227920211 | 0.219495852 | 0.37547035  | -6.27542182 | ns |
| PLPBP    | -0.0183295  | 0.002447923  | -1.22749042 | 0.219657197 | 0.375526355 | -6.27742132 | ns |
| PGD      | -0.01364756 | -0.00138277  | -1.22671248 | 0.219949322 | 0.375652893 | -6.28473209 | ns |
| KLKB1    | 0.006304037 | 0.002368563  | 1.226609388 | 0.219988509 | 0.375652893 | -6.27411873 | ns |
| ZBTB16   | -0.01937688 | 0.114089428  | -1.22388618 | 0.221014339 | 0.377184026 | -6.27430413 | ns |
| TRIM40   | -0.01802211 | 0.036227833  | -1.21981743 | 0.222553123 | 0.379588271 | -6.27989463 | ns |
| ASPN     | -0.00662832 | 0.007381007  | -1.21692043 | 0.223653033 | 0.380934416 | -6.29660422 | ns |
| PTGES2   | -0.01348798 | 0.00635611   | -1.21678468 | 0.223705425 | 0.380934416 | -6.27799096 | ns |
| TBCA     | -0.02143328 | 0.01215821   | -1.21670945 | 0.223733741 | 0.380934416 | -6.2839785  | ns |
| FGF19    | -0.02086857 | 0.02515215   | -1.21572791 | 0.224107206 | 0.381347926 | -6.29514175 | ns |
| CPB1     | -0.01521903 | 0.031093953  | -1.21493704 | 0.224408597 | 0.381638383 | -6.29945685 | ns |
| ITPR1    | -0.01746623 | 0.061217129  | -1.21441094 | 0.22460986  | 0.381758318 | -6.28578846 | ns |
| LATS1    | -0.02110711 | -0.00192792  | -1.20917904 | 0.226613081 | 0.384939032 | -6.29070343 | ns |
| NXP1     | -0.01014247 | 0.010402595  | -1.20863613 | 0.226821634 | 0.385069285 | -6.2935852  | ns |
| PPT1     | -0.01945114 | 0.199648092  | -1.20779579 | 0.227144717 | 0.385393709 | -6.2943714  | ns |
| LYZL2    | 0.008847442 | 0.034659601  | 1.205959244 | 0.227852197 | 0.38636958  | -6.29341399 | ns |
| NRXN3    | -0.00889657 | 0.05584233   | -1.20434804 | 0.228473944 | 0.387199023 | -6.29849683 | ns |
| ATF2     | -0.01853198 | 0.154533829  | -1.20356221 | 0.22877774  | 0.387414408 | -6.29965658 | ns |
| VNN1     | -0.0182013  | -0.10123829  | -1.2033317  | 0.228866388 | 0.387414408 | -6.31174826 | ns |
| TNC      | 0.012541645 | 0.00349746   | 1.202605195 | 0.229147683 | 0.387665837 | -6.30887162 | ns |
| SV2A     | -0.01513208 | 0.061479963  | -1.19978576 | 0.23024136  | 0.389290546 | -6.30393771 | ns |
| VNN2     | -0.01235766 | -0.07590843  | -1.19648604 | 0.231525487 | 0.391235198 | -6.31425862 | ns |
| MDH1     | -0.00999878 | 0.01677717   | -1.1944403  | 0.232324201 | 0.392357817 | -6.31932319 | ns |
| SMS      | -0.01563604 | 0.122758021  | -1.19304582 | 0.232870199 | 0.392876214 | -6.31226257 | ns |
| PDP1     | -0.01338249 | 0.069024917  | -1.19296921 | 0.232900249 | 0.392876214 | -6.3113698  | ns |
| PACS2    | -0.01537939 | 0.04715147   | -1.19127537 | 0.23356431  | 0.39376893  | -6.31256275 | ns |
| SEC31A   | -0.01891958 | -0.07002778  | -1.18938494 | 0.234306955 | 0.394793022 | -6.3156295  | ns |
| ACY1     | -0.01636721 | -0.00095489  | -1.18875462 | 0.234554682 | 0.394982509 | -6.32385467 | ns |
| BRD1     | -0.00756221 | 0.026491922  | -1.18766814 | 0.234982656 | 0.395345122 | -6.3236585  | ns |
| CRTAP    | -0.01235045 | 0.062242733  | -1.1875211  | 0.235040799 | 0.395345122 | -6.31846197 | ns |
| PSRC1    | -0.01535789 | 0.098925761  | -1.18557957 | 0.235807101 | 0.396251506 | -6.32008868 | ns |
| CETN3    | -0.01879826 | 0.020868665  | -1.18516201 | 0.23597161  | 0.396251506 | -6.3333012  | ns |
| CXCL13   | -0.01531492 | 0.011000087  | -1.18512353 | 0.23598677  | 0.396251506 | -6.33543209 | ns |
| CDON     | -0.00685424 | -0.01290001  | -1.18348169 | 0.236636617 | 0.397114324 | -6.33139473 | ns |

|             |             |             |             |             |             |             |    |
|-------------|-------------|-------------|-------------|-------------|-------------|-------------|----|
| TSPL        | -0.01615174 | 0.094718357 | -1.18054191 | 0.23780339  | 0.398843136 | -6.32691411 | ns |
| ACE         | -0.00628768 | -0.01228102 | -1.17945447 | 0.238235383 | 0.3993383   | -6.3399764  | ns |
| INPP5D      | -0.01418194 | 0.010741509 | -1.17591544 | 0.239647233 | 0.401474423 | -6.33143338 | ns |
| LIFR        | 0.006031381 | -0.0012579  | 1.175342488 | 0.23987596  | 0.401515335 | -6.34186471 | ns |
| ITGA2       | 0.008111499 | 0.018631455 | 1.174895474 | 0.240055008 | 0.401515335 | -6.33358551 | ns |
| VSIG10      | -0.00830723 | 0.022119706 | -1.17482168 | 0.24008417  | 0.401515335 | -6.34557742 | ns |
| CLEC1A      | -0.00812236 | -0.0125372  | -1.17439183 | 0.240256678 | 0.40157384  | -6.33409853 | ns |
| ALDH1A1     | -0.01393626 | 0.032720692 | -1.17074748 | 0.241718445 | 0.403785961 | -6.34759461 | ns |
| AHSP        | 0.022411339 | -0.00631884 | 1.169536962 | 0.242205539 | 0.40436831  | -6.34794379 | ns |
| VASH1       | -0.02078781 | 0.036014577 | -1.168366   | 0.242677317 | 0.404924438 | -6.34997685 | ns |
| AGRP        | -0.01343761 | -0.06768214 | -1.16693    | 0.243256553 | 0.405659129 | -6.35662694 | ns |
| PAMR1       | -0.0074304  | -0.03393919 | -1.16644198 | 0.243453895 | 0.405756491 | -6.35258709 | ns |
| BLOC1S2     | -0.01758891 | 0.087829121 | -1.16428014 | 0.244328925 | 0.406982579 | -6.34590037 | ns |
| TNN         | -0.01028453 | 0.013738185 | -1.16359772 | 0.244605006 | 0.407052671 | -6.35902465 | ns |
| SCN2B       | 0.00689508  | 0.011103532 | 1.163185222 | 0.244772723 | 0.407052671 | -6.34683963 | ns |
| MAPT        | 0.012934544 | -0.05906622 | 1.162901351 | 0.244887945 | 0.407052671 | -6.34738846 | ns |
| ANKRA2      | 0.01355422  | 0.03782801  | 1.162801273 | 0.244928611 | 0.407052671 | -6.34412364 | ns |
| UNC79       | -0.01351364 | 0.06290999  | -1.16060901 | 0.24581938  | 0.408300677 | -6.34665019 | ns |
| TET2        | -0.02402504 | 0.202701237 | -1.15766048 | 0.247020761 | 0.409882324 | -6.35757593 | ns |
| AFP         | -0.01730744 | 0.046349366 | -1.15758316 | 0.247052359 | 0.409882324 | -6.35757048 | ns |
| CCDC134     | -0.01134503 | 0.025800602 | -1.15631565 | 0.247569948 | 0.410378662 | -6.36698154 | ns |
| CC2D1A      | -0.01939241 | 0.043907301 | -1.15616294 | 0.247632604 | 0.410378662 | -6.36097667 | ns |
| CASP4       | -0.04029186 | 0.424528505 | -1.15472802 | 0.248219895 | 0.411118602 | -6.36193695 | ns |
| SEMA6C      | -0.00634314 | 0.031047802 | -1.15391813 | 0.248552077 | 0.411435412 | -6.35547976 | ns |
| CPTP        | -0.00947967 | 0.063736817 | -1.15052047 | 0.24994787  | 0.41351149  | -6.35990513 | ns |
| LZTFL1      | -0.01681065 | 0.015091715 | -1.1500176  | 0.250154782 | 0.413619458 | -6.36227709 | ns |
| NCF2        | -0.02170764 | 0.06640549  | -1.14728509 | 0.251281731 | 0.415112991 | -6.37323064 | ns |
| SCG3        | -0.00850948 | 0.010986714 | -1.14713819 | 0.251342386 | 0.415112991 | -6.3734177  | ns |
| GBP1        | -0.01541005 | -0.01883414 | -1.14642475 | 0.25163718  | 0.415364933 | -6.37844962 | ns |
| TCOF1       | -0.00712751 | -0.00607701 | -1.14568411 | 0.251943581 | 0.415635738 | -6.38010957 | ns |
| CAT         | 0.013078184 | 0.057282782 | 1.144041708 | 0.252624311 | 0.416523426 | -6.373411   | ns |
| PAFAH1B3    | -0.02803515 | 0.44885687  | -1.14248934 | 0.253268297 | 0.417349563 | -6.384663   | ns |
| SPINK5      | -0.00827374 | 0.02931036  | -1.14182725 | 0.25354362  | 0.417476549 | -6.38077609 | ns |
| REG3G       | -0.00919421 | 0.001160403 | -1.14134194 | 0.253745343 | 0.417476549 | -6.38405147 | ns |
| TPSG1       | -0.00603233 | 0.01295535  | -1.14127357 | 0.253774272 | 0.417476549 | -6.36987575 | ns |
| ACY3        | -0.01282655 | 0.017321984 | -1.14053705 | 0.254080798 | 0.417732916 | -6.37125101 | ns |
| FKBP1B      | -0.02766036 | 0.054004095 | -1.14021065 | 0.25421623  | 0.417732916 | -6.38450361 | ns |
| DFFA        | -0.01693552 | 0.024625016 | -1.13955082 | 0.254491057 | 0.417737162 | -6.3879598  | ns |
| DIYMK       | -0.01620557 | -0.01380721 | -1.13951765 | 0.254504935 | 0.417737162 | -6.38710131 | ns |
| MATN2       | -0.00734599 | -0.00991168 | -1.13894364 | 0.254744429 | 0.417895356 | -6.38271179 | ns |
| PSCA        | 0.060022864 | -1.29913264 | 1.137404232 | 0.255386963 | 0.418714167 | -6.38833475 | ns |
| SNX9        | -0.01717116 | 0.030647864 | -1.13662254 | 0.255713907 | 0.418827044 | -6.38399668 | ns |
| EP300       | -0.00691564 | 0.001158383 | -1.13655451 | 0.255742678 | 0.418827044 | -6.37520782 | ns |
| DEFB103A_DE | -0.00964412 | 0.035581048 | -1.13485802 | 0.256453062 | 0.419755012 | -6.37277371 | ns |
| C2orf69     | -0.01330328 | 0.071056661 | -1.13332263 | 0.257096768 | 0.420572864 | -6.38085918 | ns |
| DEFB116     | -0.0174663  | 0.196574092 | -1.1316993  | 0.257778873 | 0.42145258  | -6.38300819 | ns |
| CLEC11A     | -0.01158222 | -0.03148448 | -1.13038499 | 0.258331719 | 0.4221201   | -6.39239084 | ns |
| GC          | 0.005930866 | 0.026826384 | 1.129167873 | 0.258844505 | 0.422721452 | -6.39844548 | ns |
| GOLM2       | -0.00557211 | -0.02292632 | -1.1230886  | 0.261417254 | 0.426684395 | -6.40647847 | ns |
| TEX33       | -0.00911278 | 0.043406608 | -1.12168086 | 0.2620158   | 0.427422423 | -6.39925813 | ns |
| CASP8       | -0.01533154 | 0.032287333 | -1.12007628 | 0.262698635 | 0.428297049 | -6.40910774 | ns |
| ARNTL       | 0.012074826 | 0.106952634 | 1.118639386 | 0.263311889 | 0.429057319 | -6.39579086 | ns |
| CPLX2       | -0.00700277 | 0.002855245 | -1.11780481 | 0.26366824  | 0.429398361 | -6.39502625 | ns |
| CA1         | 0.015325341 | 0.002897596 | 1.117363496 | 0.263856963 | 0.429466183 | -6.3919417  | ns |
| TSPAN15     | 0.011429065 | 0.077819981 | 1.115524336 | 0.264643628 | 0.430506627 | -6.39924313 | ns |
| PRSS22      | -0.00760112 | 0.007900904 | -1.11417883 | 0.265220286 | 0.431204475 | -6.40018946 | ns |
| ACP6        | -0.01674853 | -0.13529999 | -1.11132525 | 0.266445612 | 0.432955586 | -6.41939639 | ns |
| HTR1A       | -0.01697022 | 0.193318319 | -1.11037454 | 0.266855373 | 0.43338025  | -6.40672582 | ns |
| RASA1       | -0.00793475 | -0.0007947  | -1.10990672 | 0.267056937 | 0.433466512 | -6.40713737 | ns |
| HGS         | -0.01897836 | 0.049616302 | -1.10617775 | 0.268667281 | 0.435621152 | -6.41035539 | ns |
| RANBP2      | -0.00751716 | 0.007332881 | -1.10614186 | 0.268682772 | 0.435621152 | -6.4113798  | ns |
| LYPD1       | -0.01558188 | 0.163751606 | -1.10489358 | 0.269223347 | 0.436024302 | -6.41264521 | ns |
| ICAM2       | -0.00771127 | -0.03876842 | -1.10487689 | 0.269230074 | 0.436024302 | -6.42613729 | ns |
| GLYR1       | -0.01371551 | 0.120905003 | -1.10392192 | 0.269644203 | 0.436300258 | -6.4257375  | ns |
| CRH         | 0.021470907 | 0.086425125 | 1.103796092 | 0.269699303 | 0.436300258 | -6.411988   | ns |
| LILRA4      | -0.01156146 | 0.083317148 | -1.10304923 | 0.270023443 | 0.436582755 | -6.41297227 | ns |

|          |             |             |             |             |             |             |    |
|----------|-------------|-------------|-------------|-------------|-------------|-------------|----|
| PALLD    | -0.00912262 | 0.043042615 | -1.10242454 | 0.270294794 | 0.436779634 | -6.41311372 | ns |
| CEP164   | 0.014995286 | 0.098847399 | 1.101489688 | 0.27070114  | 0.437047183 | -6.41638308 | ns |
| C1QL2    | -0.00948761 | 0.037425956 | -1.10135524 | 0.27075971  | 0.437047183 | -6.41428266 | ns |
| PAIP2B   | -0.01203626 | 0.038378239 | -1.09954778 | 0.271546868 | 0.43807561  | -6.41367362 | ns |
| CCL27    | -0.01441907 | -0.07629135 | -1.09705672 | 0.272633853 | 0.439586334 | -6.42784202 | ns |
| EHD3     | -0.02629633 | -0.09078662 | -1.09540467 | 0.273356886 | 0.440296551 | -6.42214475 | ns |
| SNX2     | -0.01855709 | 0.062905844 | -1.09511729 | 0.273482324 | 0.440296551 | -6.43534397 | ns |
| EDNRB    | -0.01027306 | 0.062912895 | -1.09501708 | 0.273526693 | 0.440296551 | -6.42118809 | ns |
| CD8A     | -0.01187181 | -0.01229686 | -1.09422434 | 0.273873595 | 0.440467738 | -6.43823406 | ns |
| NGF      | 0.002875738 | -0.00377047 | 1.09408552  | 0.27393473  | 0.440467738 | -6.43027785 | ns |
| SLC39A14 | -0.00764533 | 0.00447781  | -1.09171804 | 0.27497451  | 0.441896296 | -6.42700208 | ns |
| IGF1R    | -0.00502922 | -0.00848575 | -1.09116051 | 0.275219445 | 0.44197134  | -6.43379502 | ns |
| NENF     | -0.02543106 | 0.381918551 | -1.09092266 | 0.275323927 | 0.44197134  | -6.43989357 | ns |
| IST1     | -0.02216506 | -0.02995086 | -1.09008014 | 0.275694956 | 0.442323776 | -6.43655013 | ns |
| TREML1   | -0.01174251 | 0.037420251 | -1.08792828 | 0.276643707 | 0.443602211 | -6.44294081 | ns |
| SNX15    | -0.01231173 | 0.000995616 | -1.08678857 | 0.277147557 | 0.444166228 | -6.43243589 | ns |
| SCIN     | 0.016472725 | 0.081131353 | 1.085548477 | 0.27769616  | 0.444622882 | -6.43376936 | ns |
| ABCA2    | -0.00814403 | 0.000989298 | -1.08545626 | 0.277737033 | 0.444622882 | -6.43207138 | ns |
| C8B      | 0.006775739 | -0.01490046 | 1.084938451 | 0.277965797 | 0.444745275 | -6.44703407 | ns |
| F10      | 0.005780951 | -0.01711836 | 1.084305803 | 0.278246121 | 0.444949985 | -6.44684501 | ns |
| APCS     | -0.00845703 | -0.08561453 | -1.08392235 | 0.27841626  | 0.444978369 | -6.44329053 | ns |
| CDH2     | -0.00839873 | -0.04225964 | -1.08280971 | 0.278909951 | 0.445445509 | -6.44324972 | ns |
| AKR1C4   | -0.01263459 | 0.040982254 | -1.08257678 | 0.279013643 | 0.445445509 | -6.43689434 | ns |
| CEACAM19 | -0.00854111 | -0.03398322 | -1.08008976 | 0.280119055 | 0.446929871 | -6.45139351 | ns |
| GFAP     | -0.01022804 | 0.000249587 | -1.07979793 | 0.280249519 | 0.446929871 | -6.43821163 | ns |
| EVI2B    | -0.00908115 | 0.035949431 | -1.07776926 | 0.281154047 | 0.448029268 | -6.43862843 | ns |
| SCRN1    | -0.01325832 | 0.043232895 | -1.07756298 | 0.28124577  | 0.448029268 | -6.45115668 | ns |
| PTRHD1   | -0.01333848 | -0.00351064 | -1.07562423 | 0.282112481 | 0.44916491  | -6.44441187 | ns |
| GBP2     | -0.01397642 | -0.01985941 | -1.07325958 | 0.283171809 | 0.450605821 | -6.4468382  | ns |
| DAPK2    | -0.01185096 | 0.045879284 | -1.07279312 | 0.283381167 | 0.450693359 | -6.44508633 | ns |
| NXPE4    | 0.007498188 | 0.033016579 | 1.071159436 | 0.284114944 | 0.45136271  | -6.44736603 | ns |
| OGA      | -0.01561397 | 0.01674354  | -1.07115549 | 0.28411624  | 0.45136271  | -6.46092959 | ns |
| NCAM2    | 0.006577362 | 0.025691835 | 1.070823171 | 0.284265762 | 0.45136271  | -6.45872275 | ns |
| SWAP70   | -0.00792615 | 0.015111235 | -1.0704362  | 0.284439721 | 0.45139347  | -6.46169389 | ns |
| PTPRC    | -0.00502483 | -0.00194468 | -1.06972189 | 0.284761188 | 0.451658158 | -6.46304705 | ns |
| KLRF1    | -0.00907973 | 0.007081496 | -1.06849348 | 0.285315126 | 0.452291079 | -6.44965334 | ns |
| CCL5     | -0.02429256 | -0.11593381 | -1.06625925 | 0.286323235 | 0.45364289  | -6.46234815 | ns |
| IGFL4    | -0.01637333 | 0.178911512 | -1.06447286 | 0.287131637 | 0.454657235 | -6.45390737 | ns |
| VCAN     | 0.006970629 | 0.00580492  | 1.064155432 | 0.287274863 | 0.454657235 | -6.47043586 | ns |
| RCC1     | -0.01098227 | 0.097805566 | -1.06115541 | 0.288635866 | 0.456319185 | -6.4716783  | ns |
| FOXO3    | -0.02262126 | 0.111166139 | -1.06115278 | 0.288637512 | 0.456319185 | -6.45876273 | ns |
| F11      | 0.006636448 | 0.004171939 | 1.058971729 | 0.289629439 | 0.457262834 | -6.46658265 | ns |
| GALNT2   | -0.00587456 | 0.01457175  | -1.0588662  | 0.2896772   | 0.457262834 | -6.47664563 | ns |
| IMPA1    | -0.01419488 | 0.039305942 | -1.05880753 | 0.289704193 | 0.457262834 | -6.46795742 | ns |
| CD177    | -0.02980952 | -0.24156238 | -1.05735982 | 0.290364048 | 0.457600973 | -6.47212351 | ns |
| CSF2RB   | -0.00934801 | -0.04826485 | -1.05705037 | 0.290505582 | 0.457600973 | -6.46171864 | ns |
| PMS1     | -0.01110747 | 0.028484365 | -1.05700083 | 0.2905281   | 0.457600973 | -6.46378567 | ns |
| GAL      | 0.01527735  | 0.068500376 | 1.056698357 | 0.290665834 | 0.457600973 | -6.47443852 | ns |
| BECN1    | -0.0134298  | 0.047563299 | -1.05661998 | 0.290701988 | 0.457600973 | -6.46354861 | ns |
| GRIN2B   | -0.01232716 | 0.105742331 | -1.05232853 | 0.292665712 | 0.460427503 | -6.46900012 | ns |
| TAGLN3   | 0.013136408 | -0.00809489 | 1.052007628 | 0.29281297  | 0.460427503 | -6.4658444  | ns |
| CA7      | -0.00728966 | 0.021657627 | -1.05011769 | 0.293680629 | 0.461543291 | -6.47636328 | ns |
| SLC51B   | 0.016402942 | 0.179493295 | 1.04945495  | 0.29398565  | 0.461774125 | -6.4701978  | ns |
| WAS      | -0.01547343 | 0.044807297 | -1.04827386 | 0.294529219 | 0.462379203 | -6.47313373 | ns |
| PROS1    | 0.005323177 | -0.01725959 | 1.046512451 | 0.295340824 | 0.463287026 | -6.48767163 | ns |
| MFAP4    | -0.00669481 | 0.016450145 | -1.04633127 | 0.295424809 | 0.463287026 | -6.47524662 | ns |
| CNTN3    | 0.007664682 | -0.041332   | 1.045175706 | 0.295958207 | 0.463854521 | -6.48564828 | ns |
| MENT     | 0.004698165 | 0.007306714 | 1.044859919 | 0.296104393 | 0.463854521 | -6.47677296 | ns |
| GFRA3    | -0.00635191 | 0.018740388 | -1.03862963 | 0.298993514 | 0.468109839 | -6.48728361 | ns |
| CNTNAP2  | -0.00931643 | -0.00203018 | -1.03824712 | 0.299171379 | 0.468109839 | -6.4924278  | ns |
| APOE     | 0.015256193 | 0.064077749 | 1.037966744 | 0.299301736 | 0.468109839 | -6.49651004 | ns |
| PLXDC1   | -0.00778304 | 0.029775412 | -1.03714381 | 0.299685514 | 0.468459155 | -6.48375324 | ns |
| TYRP1    | 0.013074702 | -0.04533902 | 1.036110352 | 0.300167327 | 0.468720455 | -6.48346093 | ns |
| MBP      | -0.01166736 | 0.020739999 | -1.03609556 | 0.300173716 | 0.468720455 | -6.499203   | ns |
| CFHR5    | -0.00869585 | -0.05389789 | -1.0354985  | 0.300452595 | 0.468905173 | -6.49152281 | ns |
| PROK1    | -0.01424927 | -0.09842003 | -1.03412965 | 0.301091853 | 0.469651822 | -6.49666133 | ns |

|           |             |             |             |             |             |             |    |
|-----------|-------------|-------------|-------------|-------------|-------------|-------------|----|
| RWDD1     | -0.01463206 | -0.00280278 | -1.0337308  | 0.301278152 | 0.469691512 | -6.50210555 | ns |
| ADGRG2    | 0.006185472 | 0.033110771 | 1.0312607   | 0.302434875 | 0.471243242 | -6.49731594 | ns |
| PCDH7     | -0.00723936 | 0.044885238 | -1.0302072  | 0.302928862 | 0.471761215 | -6.50362282 | ns |
| NCAM1     | 0.006939812 | 0.017233854 | 1.029763053 | 0.303137471 | 0.471834443 | -6.50030063 | ns |
| IL36A     | -0.01187852 | 0.067156102 | -1.02839577 | 0.303780242 | 0.472583008 | -6.49136143 | ns |
| CD109     | -0.00750562 | -0.00691789 | -1.02634582 | 0.304744758 | 0.473796386 | -6.50500103 | ns |
| FCGR2A    | -0.01395129 | -0.16488572 | -1.02604917 | 0.304884729 | 0.473796386 | -6.49937768 | ns |
| ACADM     | -0.01468011 | 0.12953047  | -1.0215856  | 0.306993264 | 0.476819325 | -6.50568831 | ns |
| CEACAM20  | -0.00927382 | 0.044162581 | -1.02062253 | 0.307449482 | 0.477274049 | -6.50666405 | ns |
| GZMA      | 0.007730457 | -0.01291418 | 1.019356987 | 0.308049396 | 0.477951241 | -6.5167108  | ns |
| FXD5      | -0.01446594 | 0.054979395 | -1.01711887 | 0.309113175 | 0.479224382 | -6.50505443 | ns |
| SART1     | -0.00790212 | 0.02881335  | -1.0169403  | 0.309198197 | 0.479224382 | -6.50352682 | ns |
| ROBO4     | -0.00367729 | -0.00486291 | -1.01641251 | 0.309449299 | 0.479314028 | -6.50489604 | ns |
| ITGAX     | -0.01118547 | 0.048829583 | -1.01590912 | 0.309688766 | 0.479314028 | -6.51142622 | ns |
| CTSH      | -0.0167118  | -0.02036375 | -1.01578426 | 0.309748483 | 0.479314028 | -6.50526816 | ns |
| XRCC4     | -0.00815742 | 0.008474459 | -1.01406238 | 0.310569269 | 0.480329589 | -6.50812186 | ns |
| OXCT1     | -0.01416688 | 0.010908425 | -1.00692496 | 0.313986994 | 0.485358402 | -6.51441873 | ns |
| LUZP2     | -0.0089324  | 0.030133536 | -1.00634402 | 0.31426587  | 0.485532456 | -6.52790474 | ns |
| VIPR1     | 0.004909488 | 0.008147347 | 1.005063645 | 0.314882333 | 0.485830393 | -6.51627646 | ns |
| GUCA2A    | -0.00698759 | 0.007761604 | -1.0046742  | 0.315069675 | 0.485830393 | -6.52327464 | ns |
| GATA3     | 0.005433332 | -0.00430468 | 1.004334512 | 0.31523358  | 0.485830393 | -6.51447251 | ns |
| SCGB1A1   | 0.011898168 | -0.03176435 | 1.003958768 | 0.315414314 | 0.485830393 | -6.52649035 | ns |
| ITGB1     | 0.004742449 | 0.010320345 | 1.00391884  | 0.315433653 | 0.485830393 | -6.5236787  | ns |
| NAPRT     | 0.006887043 | 0.036937627 | 1.003869905 | 0.315456995 | 0.485830393 | -6.5313051  | ns |
| TUBB3     | -0.00580715 | -0.01333607 | -1.00185705 | 0.316428715 | 0.486843245 | -6.52043155 | ns |
| EIF4E     | -0.01862215 | 0.016366396 | -1.001817   | 0.316448109 | 0.486843245 | -6.51812869 | ns |
| BRDT      | -0.00748619 | 0.00774433  | -1.00129085 | 0.31670233  | 0.48697778  | -6.51919438 | ns |
| DHPS      | -0.00840921 | 0.015589513 | -0.99911437 | 0.317754936 | 0.488339165 | -6.53509852 | ns |
| BGN       | -0.02592648 | 0.192235778 | -0.99717101 | 0.318697576 | 0.489530206 | -6.52342031 | ns |
| HDDC2     | 0.008949475 | 0.034345231 | 0.996207305 | 0.319165019 | 0.489990461 | -6.5378074  | ns |
| IL17C     | -0.015057   | 0.029765727 | -0.99442628 | 0.320031305 | 0.491062224 | -6.52769864 | ns |
| HDGF      | 0.020780927 | 0.043572348 | 0.992536685 | 0.3209513   | 0.492215229 | -6.54330097 | ns |
| PAGR1     | 0.008673911 | 0.030777056 | 0.990304163 | 0.322041363 | 0.493627706 | -6.53088585 | ns |
| C9        | -0.01040649 | -0.06124499 | -0.98895075 | 0.322702699 | 0.494381889 | -6.54493387 | ns |
| ZP3       | 0.053278308 | -1.06320738 | 0.987924199 | 0.323205626 | 0.494892725 | -6.53322138 | ns |
| OLR1      | -0.01278245 | 0.012470295 | -0.98662849 | 0.323840558 | 0.495605046 | -6.53651541 | ns |
| FGF12     | -0.00940133 | 0.065087724 | -0.98569955 | 0.32429643  | 0.495645696 | -6.53401911 | ns |
| ELOA      | -0.01215159 | 0.022069614 | -0.9856223  | 0.324334081 | 0.495645696 | -6.54253394 | ns |
| C1GALT1C1 | 0.006543648 | 0.008485413 | 0.985536765 | 0.324376344 | 0.495645696 | -6.53472132 | ns |
| SNCA      | -0.02329735 | -0.03125633 | -0.9844994  | 0.324885754 | 0.496021126 | -6.53753826 | ns |
| PTPRK     | -0.00431826 | 0.011105959 | -0.98434404 | 0.324961786 | 0.496021126 | -6.54946519 | ns |
| METAP1    | -0.00650568 | 0.010479665 | -0.98381451 | 0.325222519 | 0.496159746 | -6.53810018 | ns |
| FUT1      | -0.01284196 | 0.076210297 | -0.98267642 | 0.32578232  | 0.496754243 | -6.5437818  | ns |
| PRSS53    | -0.00753327 | 0.003924755 | -0.98206183 | 0.326084717 | 0.496955832 | -6.55279403 | ns |
| GRIK2     | -0.0081572  | 0.066927855 | -0.98071255 | 0.326749797 | 0.497482787 | -6.5550918  | ns |
| CD276     | -0.00735843 | -0.04616761 | -0.98066951 | 0.326771228 | 0.497482787 | -6.54776374 | ns |
| RNF5      | -0.01462524 | -0.09088716 | -0.98032334 | 0.326942266 | 0.497483803 | -6.5406427  | ns |
| SERPINI2  | 0.011167534 | 0.090164688 | 0.979191517 | 0.327500678 | 0.498073948 | -6.55448497 | ns |
| PTP4A3    | -0.01054837 | 0.02628235  | -0.97795459 | 0.328112516 | 0.498744689 | -6.54156332 | ns |
| CREBZF    | 0.00525078  | 0.007433767 | 0.977577851 | 0.328298898 | 0.498768356 | -6.54077744 | ns |
| TEX101    | 0.009845542 | 0.099581517 | 0.976539037 | 0.328813041 | 0.499289693 | -6.54495344 | ns |
| COPE      | 0.009853225 | 0.040668882 | 0.975158738 | 0.32949718  | 0.500068486 | -6.5465118  | ns |
| COX5B     | -0.0149001  | 0.011783154 | -0.97455761 | 0.329795158 | 0.500260708 | -6.5532942  | ns |
| ERI1      | 0.00680104  | 0.003819022 | 0.973787256 | 0.33017761  | 0.5005808   | -6.55300523 | ns |
| CTNNA1    | -0.00706839 | 0.053493578 | -0.97246382 | 0.330835458 | 0.501007311 | -6.54921948 | ns |
| AMDHD2    | -0.00510517 | -0.03569156 | -0.97228346 | 0.330924739 | 0.501007311 | -6.56176931 | ns |
| PRC1      | -0.00915705 | 0.072129964 | -0.97218515 | 0.330973666 | 0.501007311 | -6.56143778 | ns |
| EIF5      | -0.00868052 | 0.045853798 | -0.97127018 | 0.331429381 | 0.501437198 | -6.54856977 | ns |
| CENPJ     | -0.01413213 | 0.10837507  | -0.97067366 | 0.331726188 | 0.501626343 | -6.55600883 | ns |
| IL13RA1   | -0.00479066 | -0.00252625 | -0.970208   | 0.331958194 | 0.501717354 | -6.55662425 | ns |
| RBP2      | -0.01635959 | 0.011937797 | -0.96809819 | 0.333010638 | 0.503047627 | -6.55951975 | ns |
| IL31RA    | 0.007962335 | 0.021292701 | 0.967654982 | 0.333232345 | 0.503122258 | -6.54969867 | ns |
| TNFSF13   | -0.00549148 | -0.01283804 | -0.96588957 | 0.334114595 | 0.5041936   | -6.56556569 | ns |
| GMPPR2    | -0.01328384 | 0.02200311  | -0.96365411 | 0.335234756 | 0.505519203 | -6.55768372 | ns |
| IFNL1     | -0.00932535 | -0.01199736 | -0.96344587 | 0.33533928  | 0.505519203 | -6.55777594 | ns |
| CEACAM1   | 0.004346648 | -0.00458456 | 0.962730365 | 0.335697935 | 0.505798746 | -6.56916309 | ns |

|          |             |             |             |             |             |             |    |
|----------|-------------|-------------|-------------|-------------|-------------|-------------|----|
| TFPI     | -0.00678606 | -0.02593067 | -0.96143604 | 0.336348234 | 0.506517196 | -6.56398081 | ns |
| CLTA     | -0.00964304 | 0.04076626  | -0.96081609 | 0.336660066 | 0.50672546  | -6.56031891 | ns |
| FGR      | -0.01253972 | 0.049065703 | -0.95972803 | 0.33720751  | 0.507287959 | -6.56132289 | ns |
| C1QTNF1  | -0.00890656 | -0.00940625 | -0.95900389 | 0.337571886 | 0.507566091 | -6.57011847 | ns |
| PDGFRB   | -0.00739305 | -0.0410986  | -0.95864899 | 0.337750548 | 0.507566091 | -6.57585539 | ns |
| TRIM21   | -0.01617466 | 0.002997749 | -0.95832527 | 0.337913863 | 0.507566091 | -6.57159692 | ns |
| ARHGAP5  | 0.014848113 | 0.160408679 | 0.956689859 | 0.338739213 | 0.508544216 | -6.56081918 | ns |
| SIL1     | -0.00633233 | 0.036300461 | -0.95431247 | 0.339940794 | 0.510085878 | -6.56560552 | ns |
| CDKL5    | 0.01029812  | 0.076932762 | 0.951923435 | 0.341151072 | 0.511555527 | -6.56882812 | ns |
| C2       | -0.00502749 | -0.03676342 | -0.95168729 | 0.341270605 | 0.511555527 | -6.57645798 | ns |
| SIRT5    | -0.01157564 | 0.092522442 | -0.94871119 | 0.342782737 | 0.513219685 | -6.57175283 | ns |
| CD2      | -0.007304   | 0.022154011 | -0.94832403 | 0.342979768 | 0.513219685 | -6.57041989 | ns |
| MELTF    | -0.00558784 | 0.000390219 | -0.94816975 | 0.343057839 | 0.513219685 | -6.58530849 | ns |
| WARS     | -0.00713903 | -0.02033913 | -0.94801478 | 0.343136834 | 0.513219685 | -6.58173168 | ns |
| EGFLAM   | -0.0058715  | 0.02256098  | -0.9477674  | 0.343262692 | 0.513219685 | -6.58452932 | ns |
| INSL4    | 0.009547888 | 0.050455278 | 0.947428357 | 0.343435365 | 0.513219685 | -6.5850174  | ns |
| OPTC     | -0.0094771  | 0.035810386 | -0.94667865 | 0.343817507 | 0.513527939 | -6.57986754 | ns |
| TNNI3    | 0.017291988 | -0.10155824 | 0.944810912 | 0.344770571 | 0.514688174 | -6.57544913 | ns |
| LRP2     | -0.00697487 | 0.008463945 | -0.94433533 | 0.34501341  | 0.51478751  | -6.57564008 | ns |
| ARMCX2   | 0.012309333 | 0.119234436 | 0.943485473 | 0.345447759 | 0.515172348 | -6.57676205 | ns |
| MEGF11   | -0.0063947  | 0.039142756 | -0.94188119 | 0.346268606 | 0.516132889 | -6.57646106 | ns |
| ODAM     | 0.011101941 | 0.080863638 | 0.940923832 | 0.346759001 | 0.516249042 | -6.5783642  | ns |
| PSMG3    | -0.0108233  | 0.0163393   | -0.94091601 | 0.346762716 | 0.516249042 | -6.58800163 | ns |
| CNTNAP4  | -0.02048922 | 0.363790031 | -0.94069362 | 0.346876925 | 0.516249042 | -6.57904549 | ns |
| GNPDA2   | 0.007035964 | 0.030758233 | 0.939712649 | 0.347379962 | 0.516579337 | -6.58028954 | ns |
| CEP152   | 0.008055975 | 0.020859488 | 0.939571168 | 0.347452677 | 0.516579337 | -6.57692162 | ns |
| FGF9     | 0.007699078 | -0.02044946 | 0.938151848 | 0.348181499 | 0.517235791 | -6.57680655 | ns |
| DDX4     | 0.010575698 | 0.069556098 | 0.938021398 | 0.348248481 | 0.517235791 | -6.57951707 | ns |
| SERPINB9 | -0.00695015 | -0.06070617 | -0.93729399 | 0.348622179 | 0.517527586 | -6.58829227 | ns |
| MYBPC1   | 0.013192605 | 0.055926679 | 0.936763848 | 0.348894652 | 0.517668894 | -6.59597597 | ns |
| PPCDC    | -0.00993158 | 0.011964808 | -0.93606237 | 0.349255654 | 0.517676577 | -6.59756412 | ns |
| SCGB2A2  | 0.005959441 | 0.01818387  | 0.935856354 | 0.349362186 | 0.517676577 | -6.58207303 | ns |
| AHNAK    | -0.00620615 | -0.01915085 | -0.93572129 | 0.349431689 | 0.517676577 | -6.58303633 | ns |
| CRADD    | -0.01578257 | -0.01467828 | -0.93482673 | 0.349892418 | 0.517682142 | -6.58928829 | ns |
| IL17A    | -0.00875347 | 0.032403889 | -0.93459782 | 0.350010544 | 0.517682142 | -6.58495074 | ns |
| IL17D    | -0.00692557 | 0.000777489 | -0.93457271 | 0.350023484 | 0.517682142 | -6.58497402 | ns |
| ROBO2    | -0.00457124 | -0.0017756  | -0.93433706 | 0.350144599 | 0.517682142 | -6.59916531 | ns |
| IGFBP7   | -0.00567852 | -0.01732856 | -0.93383642 | 0.350402814 | 0.517801729 | -6.59915471 | ns |
| GPR158   | -0.00665877 | 0.046783736 | -0.93084036 | 0.351950624 | 0.519825909 | -6.60239456 | ns |
| DNAJC6   | -0.01608867 | 0.033372294 | -0.92816284 | 0.353337964 | 0.521611149 | -6.59002498 | ns |
| COL2A1   | 0.015289946 | 0.076571737 | 0.927718318 | 0.353568554 | 0.521687811 | -6.59043423 | ns |
| RAB2B    | -0.01164611 | 0.019342448 | -0.92664003 | 0.35412794  | 0.522249286 | -6.60434753 | ns |
| VPS28    | -0.01276407 | 0.065348707 | -0.92560294 | 0.354666995 | 0.522780225 | -6.59841007 | ns |
| GGT1     | 0.009901925 | 0.002610699 | 0.925228871 | 0.354861432 | 0.522802916 | -6.60172785 | ns |
| MMP9     | -0.01256101 | -0.07186344 | -0.92474355 | 0.355113878 | 0.522911006 | -6.60226733 | ns |
| PLXNB2   | -0.0046691  | -0.01441118 | -0.92406435 | 0.355467276 | 0.522926054 | -6.60529279 | ns |
| TP53BP1  | 0.016967801 | 0.251193469 | 0.924036261 | 0.355482266 | 0.522926054 | -6.59243497 | ns |
| SHC1     | -0.02165956 | 0.233263641 | -0.92044716 | 0.357353912 | 0.525414614 | -6.59456657 | ns |
| S100A11  | -0.00927189 | 0.026371865 | -0.91929252 | 0.357957186 | 0.525928758 | -6.60218553 | ns |
| WFIKN1   | -0.00817277 | 0.013343391 | -0.91907732 | 0.358069704 | 0.525928758 | -6.60328667 | ns |
| SLAMF7   | -0.01184063 | -0.04434031 | -0.91874399 | 0.358243938 | 0.525928758 | -6.60845891 | ns |
| IL13     | 0.010187825 | 0.067688192 | 0.916780765 | 0.359272169 | 0.527173233 | -6.60131435 | ns |
| PECR     | -0.00536488 | 0.021820899 | -0.91368037 | 0.36089943  | 0.528940366 | -6.60325735 | ns |
| RILP     | -0.01230548 | -0.00541491 | -0.91353855 | 0.360973598 | 0.528940366 | -6.61750945 | ns |
| KLRD1    | -0.00928763 | -0.02532786 | -0.91309375 | 0.361207409 | 0.528940366 | -6.61860097 | ns |
| CA12     | -0.00617868 | 0.010701771 | -0.91269134 | 0.361419281 | 0.528940366 | -6.61122009 | ns |
| CACNB1   | -0.01099438 | 0.082709257 | -0.91249709 | 0.361521689 | 0.528940366 | -6.60529333 | ns |
| TDO2     | -0.00714299 | 0.031305279 | -0.91241785 | 0.361563346 | 0.528940366 | -6.60503884 | ns |
| RFC4     | -0.0040093  | 0.007016726 | -0.91054244 | 0.362550713 | 0.529928934 | -6.61902136 | ns |
| YY1      | -0.00514421 | 0.011204456 | -0.91037346 | 0.362640184 | 0.529928934 | -6.60486778 | ns |
| CCN5     | -0.00793795 | -0.03328942 | -0.91010096 | 0.362783541 | 0.529928934 | -6.61668448 | ns |
| ARTN     | -0.00924178 | 0.04621528  | -0.90942411 | 0.363140807 | 0.530113722 | -6.60797902 | ns |
| TCN1     | -0.00626523 | -0.00375252 | -0.90917326 | 0.363273136 | 0.530113722 | -6.60974331 | ns |
| IL1CAM   | -0.00568178 | -0.02232053 | -0.90805223 | 0.363864804 | 0.530580254 | -6.61991562 | ns |
| AP2B1    | -0.00913336 | 0.078026705 | -0.90787972 | 0.36395625  | 0.530580254 | -6.6091368  | ns |
| CARHSP1  | 0.010408098 | 0.032933344 | 0.907178552 | 0.364326891 | 0.530855549 | -6.60999033 | ns |

|         |             |             |             |             |             |             |    |
|---------|-------------|-------------|-------------|-------------|-------------|-------------|----|
| PAFAH2  | -0.00930778 | 0.031797092 | -0.90506817 | 0.365443557 | 0.532217051 | -6.6170603  | ns |
| CTRC    | 0.012315856 | 0.04297903  | 0.90349694  | 0.366276413 | 0.533008585 | -6.62028074 | ns |
| NAP1L4  | -0.00763692 | -0.02855715 | -0.90327256 | 0.366395358 | 0.533008585 | -6.6240449  | ns |
| SDC4    | 0.009105984 | -0.0308522  | 0.902900576 | 0.366592872 | 0.533008585 | -6.62048854 | ns |
| NPHS2   | -0.01939086 | 0.279344091 | -0.90266683 | 0.366717208 | 0.533008585 | -6.61179893 | ns |
| PSG1    | 0.022621028 | -0.18310122 | 0.901402694 | 0.367388466 | 0.533718568 | -6.62103296 | ns |
| HSP90B1 | -0.01335242 | 0.15075284  | -0.89937517 | 0.368467316 | 0.535019673 | -6.61437412 | ns |
| BMP10   | -0.0053024  | 0.01137317  | -0.89879878 | 0.368774139 | 0.535199048 | -6.61760475 | ns |
| HLA-DRA | -0.0068366  | -0.00638852 | -0.89688043 | 0.369796796 | 0.536416614 | -6.62815396 | ns |
| NEDD4L  | -0.00901138 | -0.03797548 | -0.89471874 | 0.370951778 | 0.537824823 | -6.61888552 | ns |
| GPHA2   | 0.008523696 | 0.102839806 | 0.893410864 | 0.371651091 | 0.538410997 | -6.63418593 | ns |
| DAND5   | 0.010438103 | -0.02889761 | 0.893273818 | 0.371724853 | 0.538410997 | -6.6201671  | ns |
| LPCAT2  | -0.0079835  | 0.042602369 | -0.89221104 | 0.37229386  | 0.538967809 | -6.62955936 | ns |
| CENPF   | 0.010408633 | 0.062890825 | 0.889062619 | 0.373983435 | 0.54067024  | -6.63130685 | ns |
| HAGH    | 0.014524632 | 0.031452897 | 0.889052782 | 0.373988529 | 0.54067024  | -6.63940978 | ns |
| BAIAP2  | -0.01238743 | -0.01061989 | -0.8889851  | 0.374025303 | 0.54067024  | -6.62531702 | ns |
| KDM3A   | -0.01666647 | 0.255803182 | -0.88785821 | 0.374631229 | 0.541153496 | -6.62495205 | ns |
| NPTX1   | 0.00778355  | 0.025436673 | 0.887660088 | 0.374737512 | 0.541153496 | -6.63670084 | ns |
| CDH23   | 0.004797322 | 0.015483431 | 0.887328952 | 0.37491559  | 0.541153496 | -6.64066329 | ns |
| LHPP    | -0.0117966  | 0.026361004 | -0.88651446 | 0.375354235 | 0.541518956 | -6.63734914 | ns |
| CD3E    | 0.0063145   | 0.022095897 | 0.883939475 | 0.376742805 | 0.543253823 | -6.63581327 | ns |
| UBAC1   | 0.006871859 | 0.007699667 | 0.883353652 | 0.377059105 | 0.543441553 | -6.63736188 | ns |
| NACC1   | -0.01027652 | 0.03640718  | -0.88238722 | 0.377581173 | 0.543925518 | -6.64406827 | ns |
| UBE2B   | -0.00524509 | 0.012489597 | -0.88048476 | 0.378610455 | 0.545139313 | -6.64573234 | ns |
| PTPRM   | -0.00466659 | -0.00924396 | -0.87929788 | 0.379253581 | 0.545731573 | -6.64270876 | ns |
| KLK3    | 0.015464794 | 0.561798654 | 0.879035665 | 0.37939558  | 0.545731573 | -6.64742438 | ns |
| APOB    | -0.0040813  | -0.03276531 | -0.87817106 | 0.379864522 | 0.546137078 | -6.64756608 | ns |
| VMO1    | -0.01302275 | -0.09710761 | -0.87773198 | 0.380102969 | 0.546210959 | -6.64227365 | ns |
| SPINT3  | 0.026422427 | 0.982776912 | 0.876875828 | 0.380567709 | 0.546609793 | -6.64870972 | ns |
| DENR    | 0.010334191 | 0.057299741 | 0.874734783 | 0.381732202 | 0.548012797 | -6.63642656 | ns |
| CEACAM8 | -0.00930756 | -0.03628282 | -0.87319552 | 0.382570432 | 0.548946271 | -6.64003698 | ns |
| VWC2L   | -0.00845057 | 0.087433601 | -0.8716798  | 0.383396567 | 0.549861481 | -6.6553069  | ns |
| NRP1    | 0.005194557 | -0.00772109 | 0.868898637 | 0.384916128 | 0.551769805 | -6.65329628 | ns |
| BRD3    | -0.00856638 | 0.040608058 | -0.86648475 | 0.386238214 | 0.553393319 | -6.64409652 | ns |
| BAP18   | -0.01222981 | 0.013947613 | -0.86576049 | 0.386634919 | 0.553690026 | -6.65942456 | ns |
| KIT     | 0.005570573 | 0.015016934 | 0.864861182 | 0.38712852  | 0.554125137 | -6.65471038 | ns |
| KCNIP4  | -0.00966007 | 0.049283922 | -0.86317682 | 0.388053995 | 0.555006273 | -6.64863417 | ns |
| IL1A    | 0.010700731 | 0.074834604 | 0.86304896  | 0.38812425  | 0.555006273 | -6.648756   | ns |
| ENOPH1  | 0.009509106 | 0.092678459 | 0.862352094 | 0.388507178 | 0.555281919 | -6.66141253 | ns |
| FCRL2   | -0.0091923  | 0.008403667 | -0.86167954 | 0.388877214 | 0.555538877 | -6.66328396 | ns |
| DOC2B   | -0.00621651 | 0.019526688 | -0.86107101 | 0.389212592 | 0.555677567 | -6.65021306 | ns |
| CRLF1   | -0.00493022 | -0.00557887 | -0.86081215 | 0.389354898 | 0.555677567 | -6.66080032 | ns |
| FAM13A  | -0.01205182 | 0.053318985 | -0.86026735 | 0.389655024 | 0.555702754 | -6.66302493 | ns |
| ANK2    | 0.012651375 | 0.170783597 | 0.860089973 | 0.389753164 | 0.555702754 | -6.64957361 | ns |
| SLC13A1 | -0.01105719 | 0.119842829 | -0.85971222 | 0.389961035 | 0.55572778  | -6.66366815 | ns |
| ID4     | 0.007861641 | 0.076025211 | 0.859022427 | 0.39034163  | 0.555998809 | -6.65735947 | ns |
| PARP1   | -0.01036383 | 0.039102978 | -0.85468027 | 0.392741521 | 0.559144437 | -6.66482736 | ns |
| MORF4L2 | -0.00676717 | 0.058965624 | -0.85357159 | 0.393356017 | 0.559746379 | -6.65341734 | ns |
| RECK    | 0.00356045  | 0.005920219 | 0.849045498 | 0.395869455 | 0.563048616 | -6.65977655 | ns |
| DGKZ    | -0.00650429 | 0.008008366 | -0.84841668 | 0.396219398 | 0.563271977 | -6.66117915 | ns |
| GP1BB   | -0.01181438 | 0.0065882   | -0.84704511 | 0.396983464 | 0.564083559 | -6.66062069 | ns |
| LILRB2  | -0.0064418  | -0.05750719 | -0.84654537 | 0.397261715 | 0.564204381 | -6.6730994  | ns |
| FGFBP1  | 0.005841733 | 0.004076195 | 0.842983569 | 0.399250695 | 0.566753539 | -6.67644714 | ns |
| MRPL24  | -0.0066253  | 0.013004816 | -0.83738745 | 0.402388128 | 0.570929705 | -6.66869055 | ns |
| CHI3L1  | -0.01342162 | 0.00532414  | -0.83591265 | 0.403217446 | 0.57182853  | -6.66555274 | ns |
| NGRN    | -0.00380461 | 0.010941475 | -0.83394549 | 0.404324552 | 0.573120238 | -6.68625614 | ns |
| ATP6V1D | -0.00499374 | 0.006619696 | -0.83318979 | 0.404750705 | 0.573231524 | -6.68008271 | ns |
| DKK3    | -0.0053737  | 0.007080971 | -0.83310971 | 0.404795686 | 0.573231524 | -6.68746478 | ns |
| ENO3    | -0.01026046 | 0.053892122 | -0.83253681 | 0.405119195 | 0.57341156  | -6.67354791 | ns |
| NPTN    | -0.01481913 | 0.178361566 | -0.82838733 | 0.407464325 | 0.576410089 | -6.67694278 | ns |
| UGDH    | -0.01701083 | 0.276952341 | -0.82809036 | 0.407632478 | 0.576410089 | -6.67637171 | ns |
| SKAP1   | -0.01362695 | -0.01034146 | -0.82764629 | 0.407883807 | 0.576486311 | -6.68300556 | ns |
| ENPP6   | 0.006481504 | 0.036315162 | 0.827088045 | 0.408200248 | 0.576654439 | -6.67803387 | ns |
| UNG     | -0.00589145 | 0.002390642 | -0.82664397 | 0.408451651 | 0.57673057  | -6.69133725 | ns |
| CCT5    | -0.00837743 | 0.05462942  | -0.82387233 | 0.410025165 | 0.578672538 | -6.68064347 | ns |
| MTPN    | 0.005977985 | 0.025931889 | 0.820995814 | 0.411661643 | 0.580216282 | -6.68390851 | ns |



|             |             |             |             |             |             |             |    |
|-------------|-------------|-------------|-------------|-------------|-------------|-------------|----|
| SFRP4       | -0.00701157 | 0.021823741 | -0.82095389 | 0.411685454 | 0.580216282 | -6.68401699 | ns |
| HDAC9       | -0.01111486 | 0.087882006 | -0.82090192 | 0.411715115 | 0.580216282 | -6.68405643 | ns |
| CST5        | -0.00993725 | 0.032074523 | -0.8191199  | 0.412730954 | 0.581200291 | -6.68530655 | ns |
| FRZB        | 0.004660259 | -0.03604365 | 0.818747834 | 0.412943127 | 0.581200291 | -6.68933681 | ns |
| GHRHR       | 0.009906714 | 0.085430385 | 0.818630019 | 0.413010481 | 0.581200291 | -6.6858001  | ns |
| IFNL2       | 0.010417633 | 0.110522125 | 0.817324178 | 0.413756107 | 0.581969091 | -6.68696405 | ns |
| IFNAR1      | -0.00427929 | 0.02396281  | -0.81427332 | 0.41550093  | 0.584141895 | -6.70123966 | ns |
| OSM         | -0.01305238 | -0.07276487 | -0.81254334 | 0.416492588 | 0.585254262 | -6.69768236 | ns |
| SOWAHA      | 0.008181614 | 0.065157369 | 0.808971248 | 0.418544418 | 0.587815195 | -6.69337632 | ns |
| ENTPD5      | -0.00374643 | -0.01061553 | -0.80867015 | 0.418717673 | 0.587815195 | -6.69387317 | ns |
| NOTCH3      | 0.005988646 | 0.005703887 | 0.808110124 | 0.419039583 | 0.587984422 | -6.70782324 | ns |
| YTHDF3      | -0.01492601 | -0.01614724 | -0.80758336 | 0.419343186 | 0.588127811 | -6.69472417 | ns |
| CGN         | -0.0065819  | 0.032727112 | -0.80687718 | 0.419749942 | 0.588415665 | -6.6950549  | ns |
| CD244       | -0.00477565 | -0.00300112 | -0.80648285 | 0.419976838 | 0.588451232 | -6.70956495 | ns |
| HMGCL       | -0.00804935 | 0.036305756 | -0.80573602 | 0.420407783 | 0.588772531 | -6.69532908 | ns |
| NLGN1       | 0.011171955 | 0.147300529 | 0.805065149 | 0.420794749 | 0.589031959 | -6.6965039  | ns |
| ATP1B4      | -0.0069753  | 0.04827829  | -0.80414999 | 0.421323081 | 0.589488929 | -6.69405771 | ns |
| CCL2        | -0.0094296  | 0.028783068 | -0.80065028 | 0.423346614 | 0.592036452 | -6.7050796  | ns |
| MYL6B       | -0.01539539 | 0.267128984 | -0.79876236 | 0.424440769 | 0.593282453 | -6.70151858 | ns |
| DCUN1D1     | -0.0125155  | 0.195712265 | -0.79819607 | 0.424769291 | 0.593457574 | -6.70229394 | ns |
| ANGPT2      | 0.00665324  | -0.00772069 | 0.796631033 | 0.425677534 | 0.594442085 | -6.71807955 | ns |
| CD248       | -0.00645478 | 0.007250087 | -0.79595401 | 0.426070968 | 0.594707088 | -6.71647297 | ns |
| SMPDL3B     | -0.0124255  | 0.164424298 | -0.79404325 | 0.427182449 | 0.595943789 | -6.71755301 | ns |
| CCND2       | -0.00608821 | -0.02658451 | -0.79356849 | 0.427459015 | 0.595943789 | -6.71102429 | ns |
| PDE1C       | 0.008902996 | 0.090444885 | 0.792965774 | 0.427810286 | 0.595943789 | -6.7029185  | ns |
| DEFB104A_DE | 0.008985394 | 0.097146164 | 0.792608626 | 0.428018352 | 0.595943789 | -6.7067034  | ns |
| TBC1D17     | 0.007739818 | 0.041676135 | 0.792569578 | 0.428041117 | 0.595943789 | -6.7066299  | ns |
| PPIF        | -0.01003092 | 0.089731501 | -0.79181956 | 0.428478028 | 0.595943789 | -6.71973019 | ns |
| SSBP1       | -0.00581914 | 0.023045651 | -0.79178765 | 0.428496994 | 0.595943789 | -6.704999   | ns |
| ISM2        | 0.006913613 | 0.006836245 | 0.791628054 | 0.428589711 | 0.595943789 | -6.71988065 | ns |
| CLINT1      | 0.007952828 | 0.025287201 | 0.788826627 | 0.430225792 | 0.59793399  | -6.70616632 | ns |
| NAMPT       | -0.00926134 | 0.040595742 | -0.78735951 | 0.431083847 | 0.598785878 | -6.7098279  | ns |
| CLUL1       | 0.007900324 | 0.035076086 | 0.787077208 | 0.43124887  | 0.598785878 | -6.716985   | ns |
| IFNG        | -0.019601   | -0.05072172 | -0.78500556 | 0.432462617 | 0.600185762 | -6.71256191 | ns |
| PRKRA       | -0.01173498 | 0.022198325 | -0.78279852 | 0.433757758 | 0.601697223 | -6.71338054 | ns |
| FCN2        | 0.007275979 | -0.06413633 | 0.782255091 | 0.434076847 | 0.601790087 | -6.71842424 | ns |
| ATP6V1G2    | -0.01551177 | -0.00683579 | -0.78191876 | 0.434274632 | 0.601790087 | -6.71324785 | ns |
| EIF5A       | -0.00518607 | 0.008168778 | -0.78163225 | 0.43444298  | 0.601790087 | -6.7151836  | ns |
| SPESP1      | -0.00473418 | 0.025112008 | -0.78032131 | 0.4352137   | 0.602571837 | -6.72926271 | ns |
| SORD        | -0.01174443 | -0.03154459 | -0.77735848 | 0.436959203 | 0.604701836 | -6.73082963 | ns |
| TGM2        | 0.013212968 | 0.029870414 | 0.776729555 | 0.43733037  | 0.604928792 | -6.7244493  | ns |
| MEP1B       | 0.020330493 | -0.20000856 | 0.776096181 | 0.437704189 | 0.605114052 | -6.72611728 | ns |
| BTLA        | -0.01362361 | 0.116180113 | -0.7758009  | 0.437878764 | 0.605114052 | -6.71627616 | ns |
| IGF2BP3     | 0.007563838 | 0.075782969 | 0.775228966 | 0.438216569 | 0.60529441  | -6.71841542 | ns |
| ANGPTL1     | -0.00491277 | 0.012677382 | -0.77351061 | 0.439232405 | 0.606410696 | -6.71932931 | ns |
| AIF1L       | -0.00921418 | 0.121793856 | -0.77278435 | 0.439662132 | 0.606717119 | -6.72113245 | ns |
| TIGAR       | -0.00794948 | -0.02390478 | -0.77153094 | 0.440404418 | 0.60745437  | -6.72163901 | ns |
| BTN1A1      | 0.006240678 | 0.047315714 | 0.771089393 | 0.440665761 | 0.607527867 | -6.73433388 | ns |
| CLSTN3      | -0.00478874 | 0.002806415 | -0.76992637 | 0.441355305 | 0.60819136  | -6.73720355 | ns |
| AMIGO2      | -0.00375732 | -0.01109965 | -0.76681067 | 0.443205927 | 0.610453447 | -6.73277517 | ns |
| AKAP12      | 0.003019953 | 0.01417554  | 0.766315482 | 0.443500552 | 0.610571246 | -6.72704031 | ns |
| NT5C3A      | -0.01482578 | -0.05079403 | -0.76570268 | 0.443865008 | 0.610785026 | -6.73636147 | ns |
| TBCC        | -0.01383926 | -0.01503337 | -0.76528758 | 0.444112147 | 0.610837243 | -6.73358517 | ns |
| HGFAC       | 0.004341681 | -0.02443488 | 0.764488534 | 0.444587956 | 0.611203782 | -6.73491057 | ns |
| VTA1        | -0.01204146 | 0.019069895 | -0.76334199 | 0.44527108  | 0.611854849 | -6.74320633 | ns |
| DOCK9       | 0.018267525 | 0.374213515 | 0.762734689 | 0.44563357  | 0.612064922 | -6.7297536  | ns |
| NTF3        | -0.00590161 | 0.011981507 | -0.76168405 | 0.446260306 | 0.612637562 | -6.73940687 | ns |
| ATXN3       | -0.00992726 | 0.011150893 | -0.76112025 | 0.446596824 | 0.612798773 | -6.74389341 | ns |
| OBP2B       | 0.010598113 | -0.03002272 | 0.760784706 | 0.446797462 | 0.612798773 | -6.73476947 | ns |
| XPNPEP2     | -0.01632711 | -0.08891704 | -0.75928473 | 0.447693843 | 0.613646648 | -6.74298701 | ns |
| DCXR        | -0.00906747 | 0.019268869 | -0.75873223 | 0.448024336 | 0.613646648 | -6.74340315 | ns |
| CNTN2       | -0.00749603 | 0.041309625 | -0.75820508 | 0.448339732 | 0.613646648 | -6.74772541 | ns |
| CHAD        | -0.00782335 | 0.005613369 | -0.75810436 | 0.448400306 | 0.613646648 | -6.73324991 | ns |
| RAB37       | -0.01400979 | 0.193401466 | -0.75784881 | 0.44855332  | 0.613646648 | -6.73334731 | ns |
| IL31        | -0.00865503 | 0.107510903 | -0.75764305 | 0.448676573 | 0.613646648 | -6.73124325 | ns |
| MMP8        | -0.01223444 | -0.03214886 | -0.7548403  | 0.45035629  | 0.615655602 | -6.74875909 | ns |

|          |             |              |             |             |             |             |    |
|----------|-------------|--------------|-------------|-------------|-------------|-------------|----|
| CA9      | 0.007207417 | 0.034974485  | 0.754121668 | 0.450787609 | 0.615956864 | -6.75078966 | ns |
| CADPS    | -0.00664831 | 0.059040309  | -0.7536061  | 0.451097519 | 0.616092027 | -6.73629353 | ns |
| SMPD3    | -0.00919191 | 0.115722524  | -0.74853904 | 0.454146794 | 0.619966637 | -6.73804547 | ns |
| BDNF     | -0.01262114 | -0.09279052  | -0.74693443 | 0.455114485 | 0.620997335 | -6.75400006 | ns |
| CCL13    | -0.01132234 | -0.01076245  | -0.74604013 | 0.455654484 | 0.621443761 | -6.75537726 | ns |
| PSMD1    | -0.00753331 | 0.032713185  | -0.74361893 | 0.4571183   | 0.62314913  | -6.75794728 | ns |
| FGFR4    | 0.008005571 | 0.040690262  | 0.743201849 | 0.457371012 | 0.623202685 | -6.74434896 | ns |
| IL1R2    | 0.003161958 | -0.01122243  | 0.740022431 | 0.459297746 | 0.625458525 | -6.75200512 | ns |
| TFAP2A   | -0.00924326 | 0.062959625  | -0.73976358 | 0.459454978 | 0.625458525 | -6.74687554 | ns |
| CSNK2A1  | -0.00681177 | 0.038722309  | -0.73780923 | 0.460641539 | 0.626781591 | -6.76221786 | ns |
| S100A4   | -0.0092286  | -0.02685058  | -0.73633076 | 0.461540619 | 0.627712439 | -6.76002065 | ns |
| WFDC1    | -0.00834315 | 0.056233955  | -0.73354791 | 0.463235676 | 0.629724476 | -6.75411942 | ns |
| IGSF21   | -0.00596108 | 0.029836018  | -0.73134665 | 0.464578808 | 0.631218164 | -6.7520519  | ns |
| BTD      | -0.00308425 | -0.0210061   | -0.73103832 | 0.464766799 | 0.631218164 | -6.76591314 | ns |
| GBA      | -0.00812456 | -0.02220117  | -0.72876216 | 0.466158454 | 0.632634887 | -6.75456325 | ns |
| TMED10   | -0.00758412 | 0.0723704    | -0.72827591 | 0.466456048 | 0.632634887 | -6.7534352  | ns |
| CHRD12   | 0.008691035 | 0.019447355  | 0.727991956 | 0.466629645 | 0.632634887 | -6.76201431 | ns |
| KLRC1    | 0.009024224 | 0.097034294  | 0.727682594 | 0.466819207 | 0.632634887 | -6.75567027 | ns |
| KIF20B   | 0.011516558 | 0.062821701  | 0.727561728 | 0.466893213 | 0.632634887 | -6.75575753 | ns |
| STX5     | 0.006098805 | 0.040134448  | 0.726455918 | 0.467570631 | 0.633258925 | -6.75420366 | ns |
| RNF43    | 0.008829406 | 0.106206631  | 0.726050464 | 0.467818965 | 0.633301519 | -6.76192759 | ns |
| ACHE     | 0.004799198 | 0.032052004  | 0.724942957 | 0.468498226 | 0.633927164 | -6.75764742 | ns |
| MYH4     | 0.00694067  | 0.062714261  | 0.724533087 | 0.468749798 | 0.633973789 | -6.75613265 | ns |
| MTR      | -0.00958767 | 0.098553785  | -0.72199362 | 0.47030963  | 0.635506219 | -6.75795493 | ns |
| CCDC28A  | -0.00434063 | -0.00903071  | -0.7219797  | 0.47031813  | 0.635506219 | -6.75944453 | ns |
| MAG      | 0.00693432  | -0.02653284  | 0.720133203 | 0.471454121 | 0.636725781 | -6.76076553 | ns |
| TSPAN8   | -0.01456935 | -0.01467177  | -0.71980361 | 0.471656803 | 0.636725781 | -6.77314754 | ns |
| RGL2     | -0.00936125 | 0.1011106061 | -0.71853905 | 0.472435978 | 0.637482928 | -6.76731102 | ns |
| ENG      | -0.00268389 | 0.000188558  | -0.71726426 | 0.473221859 | 0.63824842  | -6.77658223 | ns |
| BLMH     | 0.0049263   | -0.00352135  | 0.715730896 | 0.474168303 | 0.639229661 | -6.77767251 | ns |
| IGF2R    | -0.00370733 | -0.01476592  | -0.71532546 | 0.474418824 | 0.63927225  | -6.77376373 | ns |
| CD40LG   | -0.01230059 | -0.04097146  | -0.71488601 | 0.474690226 | 0.639342925 | -6.77871077 | ns |
| HMOX1    | 0.007286636 | 0.017567842  | 0.714271893 | 0.475070104 | 0.639559568 | -6.76570983 | ns |
| TLR1     | -0.00379593 | 0.003647543  | -0.71245868 | 0.476191848 | 0.640704501 | -6.76419491 | ns |
| FGL1     | -0.00904627 | -0.03821862  | -0.71189408 | 0.476541099 | 0.640704501 | -6.77874523 | ns |
| BRSK2    | -0.0056867  | 0.068094003  | -0.7118331  | 0.476578828 | 0.640704501 | -6.78090263 | ns |
| CSF2RA   | 0.009692736 | -0.05182923  | 0.710208388 | 0.477585766 | 0.641762741 | -6.77390537 | ns |
| KLHL41   | 0.007275242 | 0.073846963  | 0.708658893 | 0.478546822 | 0.642486383 | -6.78313995 | ns |
| MORF4L1  | -0.00588864 | 0.042431567  | -0.70863095 | 0.478564344 | 0.642486383 | -6.77432654 | ns |
| COCH     | -0.0066016  | -0.01111773  | -0.70776391 | 0.479102531 | 0.642913323 | -6.78283683 | ns |
| FARSA    | -0.0101523  | -0.118898617 | -0.70691472 | 0.479630375 | 0.643325997 | -6.77012339 | ns |
| APP      | -0.01027648 | 0.003109772  | -0.70642159 | 0.479936707 | 0.643441316 | -6.78004465 | ns |
| ADGRF5   | -0.00406884 | -0.02799286  | -0.70579511 | 0.480326179 | 0.643667941 | -6.78421773 | ns |
| DNAJB2   | -0.00803002 | 0.015920004  | -0.70523737 | 0.480673373 | 0.643835308 | -6.77162844 | ns |
| PDIA2    | -0.00594012 | 0.033149884  | -0.70488609 | 0.480892057 | 0.643835308 | -6.76836367 | ns |
| VWA1     | -0.0066118  | -0.01039964  | -0.70449456 | 0.481135421 | 0.643865916 | -6.7859426  | ns |
| ERVV-1   | 0.006583343 | 0.046614404  | 0.704111742 | 0.481374095 | 0.643890224 | -6.77060553 | ns |
| DCLRE1C  | -0.00459407 | 0.012530805  | -0.70242931 | 0.482422353 | 0.644755377 | -6.77007878 | ns |
| PNPT1    | 0.018947305 | 0.41178701   | 0.702364823 | 0.482462499 | 0.644755377 | -6.77353948 | ns |
| SH2D1A   | 0.008596367 | 0.05250215   | 0.700579328 | 0.483576205 | 0.645940356 | -6.78373902 | ns |
| ZNF75D   | -0.00889401 | 0.052044865  | -0.70023436 | 0.48379163  | 0.645940356 | -6.78019557 | ns |
| PNLIPRP2 | -0.04625407 | -0.91199875  | -0.69985424 | 0.484028961 | 0.645961867 | -6.78189664 | ns |
| TTN      | -0.00958978 | 0.133064876  | -0.69924979 | 0.484406757 | 0.646170732 | -6.77399028 | ns |
| ACTN4    | -0.0048382  | 0.020719715  | -0.69611601 | 0.486366888 | 0.648243761 | -6.77787471 | ns |
| IL25     | 0.004896018 | -0.01733542  | 0.696055596 | 0.486404822 | 0.648243761 | -6.77247099 | ns |
| TGFB2    | -0.00760848 | -0.02043669  | -0.69475021 | 0.487222305 | 0.648909766 | -6.79090167 | ns |
| MTSS2    | -0.0142007  | -0.01262639  | -0.69454807 | 0.487349012 | 0.648909766 | -6.79104101 | ns |
| IL20RB   | 0.00601639  | 0.00850253   | 0.690307298 | 0.490011615 | 0.652019113 | -6.77960939 | ns |
| ENTPD2   | 0.006475091 | -0.0141158   | 0.690117723 | 0.490130806 | 0.652019113 | -6.78110083 | ns |
| FOLH1    | -0.01555682 | 0.318674446  | -0.68941234 | 0.490574462 | 0.652312127 | -6.78022194 | ns |
| MILR1    | -0.00767548 | 0.004733664  | -0.68844499 | 0.49118317  | 0.65282424  | -6.78314366 | ns |
| GFOD2    | 0.019329778 | 0.48734443   | 0.687193642 | 0.491971304 | 0.653574253 | -6.78309873 | ns |
| RGS8     | -0.00996525 | 0.149895962  | -0.68576776 | 0.492870094 | 0.654470521 | -6.78496882 | ns |
| NTSC     | -0.006628   | 0.006153173  | -0.68473468 | 0.493521736 | 0.654664324 | -6.79203657 | ns |
| NOS2     | -0.00564533 | 0.013017128  | -0.68444769 | 0.49370306  | 0.654664324 | -6.7841507  | ns |
| F3       | -0.00403405 | 0.001808745  | -0.68418456 | 0.493868913 | 0.654664324 | -6.797478   | ns |

|         |             |             |             |             |             |             |    |
|---------|-------------|-------------|-------------|-------------|-------------|-------------|----|
| TIMP4   | -0.00577139 | -0.00530411 | -0.6840955  | 0.493925179 | 0.654664324 | -6.79544787 | ns |
| LRRN1   | 0.005943447 | 0.029754759 | 0.683760273 | 0.494137044 | 0.654664324 | -6.78633272 | ns |
| NPR1    | 0.005919561 | 0.083365112 | 0.681993416 | 0.495253622 | 0.655846066 | -6.78581435 | ns |
| SMAD3   | -0.00723464 | 0.055930727 | -0.68160712 | 0.49549763  | 0.655871749 | -6.7998774  | ns |
| SPINK8  | -0.00531309 | 0.036054929 | -0.68106602 | 0.495840205 | 0.65594443  | -6.78644143 | ns |
| LYAR    | -0.00823242 | 0.053242901 | -0.68063736 | 0.496111455 | 0.65594443  | -6.78754753 | ns |
| ECM1    | -0.00515568 | -0.05004231 | -0.68039611 | 0.496264147 | 0.65594443  | -6.78633192 | ns |
| THRAP3  | 0.015985918 | 0.382559705 | 0.68010083  | 0.496451093 | 0.65594443  | -6.78709317 | ns |
| CLEC2L  | -0.0073163  | 0.095013194 | -0.67828476 | 0.497601544 | 0.656717685 | -6.78979729 | ns |
| S100G   | -0.00634664 | 0.06627761  | -0.678212   | 0.497647393 | 0.656717685 | -6.8040923  | ns |
| EVPL    | -0.00461018 | 0.029015047 | -0.67811187 | 0.497711104 | 0.656717685 | -6.79532375 | ns |
| TADA3   | -0.00550045 | 0.008539283 | -0.67468395 | 0.499886681 | 0.659290474 | -6.80453647 | ns |
| GUCY2C  | 0.011449976 | 0.227597508 | 0.674316451 | 0.500120357 | 0.659300877 | -6.7978704  | ns |
| CDHR2   | -0.0116205  | -0.17423928 | -0.67031126 | 0.50266951  | 0.66236235  | -6.80157994 | ns |
| UPK3BL1 | 0.007425382 | 0.070514426 | 0.669897323 | 0.502933402 | 0.662411156 | -6.79945345 | ns |
| FLT1    | -0.00312949 | -0.00074714 | -0.66893287 | 0.503548417 | 0.662658728 | -6.80137762 | ns |
| EDDM3B  | -0.00703427 | 0.185020185 | -0.66889062 | 0.503575246 | 0.662658728 | -6.80839864 | ns |
| ATP1B1  | -0.00672059 | 0.0610765   | -0.66608838 | 0.505364831 | 0.664707672 | -6.79645085 | ns |
| RASGRF1 | 0.006074692 | 0.009859614 | 0.665701309 | 0.505612257 | 0.664707672 | -6.79500524 | ns |
| SLC28A1 | 0.008247381 | 0.097488772 | 0.665329666 | 0.505849874 | 0.664707672 | -6.79525062 | ns |
| SPTBN2  | -0.0043701  | 0.035285245 | -0.66423906 | 0.506547473 | 0.664707672 | -6.7994791  | ns |
| S100A12 | 0.01101999  | -0.022183   | 0.664093562 | 0.506640535 | 0.664707672 | -6.80193943 | ns |
| MAPRE3  | -0.02025117 | 0.546414276 | -0.66406286 | 0.506660272 | 0.664707672 | -6.79608604 | ns |
| APOH    | -0.0052627  | 0.002796025 | -0.66396014 | 0.50672578  | 0.664707672 | -6.80891548 | ns |
| PGA4    | 0.008581471 | 0.005538634 | 0.660006614 | 0.509259405 | 0.667731236 | -6.81406559 | ns |
| BCHE    | -0.00387652 | -0.02785392 | -0.6595844  | 0.509530599 | 0.667786961 | -6.80364486 | ns |
| ANKRD54 | -0.00873741 | 0.086611443 | -0.6578398  | 0.510651142 | 0.66866787  | -6.80268499 | ns |
| SLC4A1  | 0.006606521 | 0.081927052 | 0.657661073 | 0.510765718 | 0.66866787  | -6.81621814 | ns |
| COQ7    | 0.00592954  | 0.063308906 | 0.657468535 | 0.510889732 | 0.66866787  | -6.80295135 | ns |
| IL21R   | 0.007182822 | 0.098147031 | 0.656720817 | 0.511370498 | 0.668997246 | -6.80205262 | ns |
| NDUFA5  | 0.00473979  | -0.00320435 | 0.655731447 | 0.512006984 | 0.669529956 | -6.80142672 | ns |
| BCL2L15 | -0.00765416 | 0.052175926 | -0.65485382 | 0.512571893 | 0.669968634 | -6.80326735 | ns |
| LAMB1   | -0.00403616 | -0.02319061 | -0.65178306 | 0.514551063 | 0.672254632 | -6.80664405 | ns |
| RAB6A   | -0.00662248 | 0.055474091 | -0.64948416 | 0.516035202 | 0.673892124 | -6.81796491 | ns |
| TSNAX   | -0.00533069 | 0.028248271 | -0.6468684  | 0.517726995 | 0.675735043 | -6.80896934 | ns |
| GBP6    | 0.005780997 | 0.046211873 | 0.64658683  | 0.517909256 | 0.675735043 | -6.80915001 | ns |
| CCL24   | 0.011944076 | 0.04480936  | 0.644813774 | 0.519057491 | 0.676692961 | -6.82098566 | ns |
| CRNN    | -0.00949664 | 0.007228069 | -0.6446536  | 0.519161607 | 0.676692961 | -6.80743854 | ns |
| EPHX2   | -0.00859464 | 0.095137112 | -0.64436436 | 0.519349001 | 0.676692961 | -6.81230989 | ns |
| MMP13   | -0.0044473  | -0.00648146 | -0.64402285 | 0.519570418 | 0.676692961 | -6.81249538 | ns |
| S100A16 | -0.00881712 | 0.050048385 | -0.64281006 | 0.520357151 | 0.677415462 | -6.81257854 | ns |
| PSMD9   | 0.008145657 | 0.050005513 | 0.642216621 | 0.520742166 | 0.677614583 | -6.81987504 | ns |
| MYLPF   | 0.006227524 | 0.075472313 | 0.641687545 | 0.521085808 | 0.677759715 | -6.81376196 | ns |
| IL6ST   | -0.00244503 | -0.00855254 | -0.64117256 | 0.521420176 | 0.677838686 | -6.82099055 | ns |
| GMPT    | -0.00710245 | -0.0478651  | -0.64044222 | 0.52189459  | 0.677838686 | -6.82877496 | ns |
| COL5A1  | -0.00500877 | 0.026862329 | -0.640417   | 0.521911223 | 0.677838686 | -6.81490028 | ns |
| SH3BGR2 | -0.00812257 | 0.113726286 | -0.64016499 | 0.52207507  | 0.677838686 | -6.8150575  | ns |
| SUMF1   | 0.008788336 | 0.130165319 | 0.63773623  | 0.523655109 | 0.679587963 | -6.81424347 | ns |
| RNF168  | 0.005438437 | 0.034100253 | 0.636780843 | 0.524277301 | 0.679894463 | -6.81484751 | ns |
| ACYP1   | -0.00874376 | -0.00051881 | -0.63648374 | 0.524470842 | 0.679894463 | -6.81526474 | ns |
| RELB    | 0.006400675 | 0.077298736 | 0.636301209 | 0.524589803 | 0.679894463 | -6.81515042 | ns |
| CA14    | 0.005042356 | 0.057241502 | 0.634938221 | 0.525478068 | 0.680743548 | -6.83293729 | ns |
| MFAP3L  | 0.00872634  | 0.15983596  | 0.634212459 | 0.525951776 | 0.681055071 | -6.81849339 | ns |
| CRYGD   | 0.012536367 | -4.33E-05   | 0.633825317 | 0.526204182 | 0.681079881 | -6.83200142 | ns |
| IL5     | 0.020218187 | 0.307193057 | 0.632355428 | 0.527164222 | 0.681789676 | -6.81989554 | ns |
| CCNE1   | -0.01245853 | 0.258550342 | -0.63166341 | 0.527616444 | 0.681789676 | -6.81806761 | ns |
| DKK1    | -0.00826171 | -0.04478916 | -0.6311563  | 0.527947634 | 0.681789676 | -6.83467158 | ns |
| SPARCL1 | -0.00385105 | 0.006737745 | -0.63096239 | 0.52807455  | 0.681789676 | -6.82660884 | ns |
| RGS10   | -0.00770937 | 0.050055733 | -0.63059433 | 0.528315093 | 0.681789676 | -6.83501654 | ns |
| HBZ     | -0.01373488 | 0.091404729 | -0.63051295 | 0.528368336 | 0.681789676 | -6.83413459 | ns |
| MYBPC2  | 0.010625325 | 0.18236127  | 0.630484802 | 0.528386999 | 0.681789676 | -6.82019213 | ns |
| ENSA    | -0.00665948 | 0.040915338 | -0.62823933 | 0.529856453 | 0.683383764 | -6.83456243 | ns |
| MMUT    | -0.00651019 | 0.052119822 | -0.62690128 | 0.530733471 | 0.68361494  | -6.82158633 | ns |
| PIK3AP1 | -0.00853581 | 0.0190266   | -0.62681944 | 0.530786928 | 0.68361494  | -6.83231738 | ns |
| ATP2B4  | -0.00806159 | 0.152626899 | -0.62677475 | 0.530816418 | 0.68361494  | -6.82166502 | ns |
| RNF31   | -0.00471447 | 0.023818947 | -0.62653721 | 0.530972152 | 0.68361494  | -6.82126718 | ns |

|          |             |             |             |             |             |             |    |
|----------|-------------|-------------|-------------|-------------|-------------|-------------|----|
| FEN1     | -0.00890307 | 0.090077812 | -0.62567843 | 0.531535377 | 0.683871189 | -6.82316318 | ns |
| TXK      | -0.00979229 | 0.224679134 | -0.62551937 | 0.531639589 | 0.683871189 | -6.82933906 | ns |
| IL18RAP  | 0.023989888 | 0.437480727 | 0.624982305 | 0.531992066 | 0.684023264 | -6.82741769 | ns |
| NAAA     | -0.00818266 | 0.052243935 | -0.62398333 | 0.532647915 | 0.684565102 | -6.82851287 | ns |
| DIPK2B   | -0.00343268 | 0.021271387 | -0.62260702 | 0.533552173 | 0.685425581 | -6.82605958 | ns |
| SIGLEC7  | -0.0038224  | -0.03691398 | -0.61931577 | 0.535717573 | 0.687904711 | -6.8346594  | ns |
| IL22RA1  | -0.00589126 | 0.035876052 | -0.61798815 | 0.536592463 | 0.688725272 | -6.82880733 | ns |
| CEP350   | -0.00478331 | 0.013706483 | -0.61751001 | 0.536907743 | 0.688827157 | -6.82568162 | ns |
| NMNAT1   | -0.01013983 | 0.037024758 | -0.61567588 | 0.538117639 | 0.6898054   | -6.83609056 | ns |
| ACRBP    | -0.00482686 | 0.029913228 | -0.61563774 | 0.538142706 | 0.6898054   | -6.84234005 | ns |
| AARSD1   | -0.00772008 | 0.006943245 | -0.61448256 | 0.538905631 | 0.690480229 | -6.83716717 | ns |
| SERPINE1 | -0.00922344 | -0.09002708 | -0.61363641 | 0.539464619 | 0.690636782 | -6.84501654 | ns |
| CNTN5    | 0.004974054 | 0.045766772 | 0.61358164  | 0.539500856 | 0.690636782 | -6.84347234 | ns |
| ERBB3    | 0.002585764 | 0.004432797 | 0.613100415 | 0.539819078 | 0.690741326 | -6.83701698 | ns |
| AAMDC    | -0.00668536 | 0.012003783 | -0.61207229 | 0.540499159 | 0.691308605 | -6.83154185 | ns |
| NME1     | -0.00266657 | 0.006782124 | -0.61135797 | 0.540971864 | 0.691610264 | -6.83058856 | ns |
| ALDH2    | -0.00658544 | 0.109272298 | -0.61074031 | 0.541380502 | 0.691829788 | -6.84532019 | ns |
| NOP56    | -0.01365315 | 0.32764567  | -0.60893555 | 0.542576364 | 0.692921172 | -6.83260061 | ns |
| EDEM2    | -0.00459907 | 0.051127624 | -0.60840321 | 0.542929275 | 0.692921172 | -6.83292208 | ns |
| NSFL1C   | -0.00900765 | -0.01148979 | -0.60837688 | 0.542946452 | 0.692921172 | -6.8486822  | ns |
| SAG      | 0.006595407 | 0.010505829 | 0.607389272 | 0.543601753 | 0.693454399 | -6.83534245 | ns |
| TLR4     | -0.00354299 | 0.003920223 | -0.60682683 | 0.543975005 | 0.693627517 | -6.83332677 | ns |
| DNPEP    | 0.00698351  | 0.009947578 | 0.60596398  | 0.544547546 | 0.694054489 | -6.84914099 | ns |
| ATP1B3   | -0.00496418 | 0.053492184 | -0.60501383 | 0.545178937 | 0.69454141  | -6.83496232 | ns |
| IMPG1    | -0.00391309 | 0.031766187 | -0.60437778 | 0.545601602 | 0.69454141  | -6.83715281 | ns |
| TG       | 0.013696995 | 0.198544512 | 0.60431494  | 0.545643149 | 0.69454141  | -6.849194   | ns |
| IL9      | -0.00699882 | 0.088876583 | -0.60344747 | 0.546220017 | 0.694963675 | -6.84279696 | ns |
| BCAM     | -0.00312677 | 0.002000712 | -0.60310027 | 0.546450889 | 0.694963675 | -6.84717621 | ns |
| BCL2     | -0.00654972 | 0.027505554 | -0.60232394 | 0.546967361 | 0.69516817  | -6.85021607 | ns |
| ITIH1    | -0.00229684 | -0.0184061  | -0.60214291 | 0.547087827 | 0.69516817  | -6.85117861 | ns |
| BRK1     | -0.00579185 | -0.01238464 | -0.601393   | 0.547587306 | 0.695500188 | -6.8388338  | ns |
| HRAS     | 0.011839759 | 0.270112446 | 0.598243738 | 0.549686202 | 0.697862482 | -6.84489475 | ns |
| PCARE    | -0.01028578 | 0.190017493 | -0.59718591 | 0.550392231 | 0.698455156 | -6.84143978 | ns |
| PGR      | -0.01279153 | 0.317079291 | -0.59255908 | 0.553485183 | 0.701977871 | -6.84181587 | ns |
| CEP290   | -0.00655134 | 0.057710574 | -0.59231419 | 0.553648985 | 0.701977871 | -6.84940185 | ns |
| REG1B    | -0.0071634  | 0.042539651 | -0.59098812 | 0.55453699  | 0.702798615 | -6.85855412 | ns |
| AMY2B    | -0.00634966 | 0.02244243  | -0.58897907 | 0.555884752 | 0.704201074 | -6.813011   | ns |
| HEPH     | 0.003224573 | -0.01941702 | 0.586154624 | 0.557780153 | 0.70629577  | -6.86091381 | ns |
| IL33     | -0.00494031 | -0.01659228 | -0.58407196 | 0.559180624 | 0.707762211 | -6.84903267 | ns |
| LCP1     | -0.00573434 | 0.058434104 | -0.58310453 | 0.559831424 | 0.708278924 | -6.86211912 | ns |
| SDK2     | 0.004534324 | 0.019304664 | 0.582463981 | 0.560262867 | 0.708313171 | -6.85005817 | ns |
| FBN2     | -0.00710844 | -0.03299428 | -0.58200238 | 0.560573759 | 0.708313171 | -6.84999445 | ns |
| DIPK1C   | -0.00507894 | 0.053822815 | -0.58198389 | 0.560586211 | 0.708313171 | -6.85000512 | ns |
| LILRA2   | -0.0046776  | -0.03608417 | -0.5799099  | 0.56198388  | 0.709772029 | -6.86078822 | ns |
| IL12RB2  | 0.005034491 | 0.076340952 | 0.579317924 | 0.562383353 | 0.709969472 | -6.84951346 | ns |
| PPY      | 0.012875471 | 0.035545384 | 0.577248124 | 0.563780284 | 0.711425424 | -6.86309594 | ns |
| RBKS     | -0.00650678 | 0.009818999 | -0.57647064 | 0.564305754 | 0.711780908 | -6.85064373 | ns |
| ARID3A   | -0.00475414 | 0.033694877 | -0.57478403 | 0.565445945 | 0.712911122 | -6.85446439 | ns |
| GGA1     | -0.00877412 | 0.162136785 | -0.57386798 | 0.566065708 | 0.713293497 | -6.85488194 | ns |
| GAMT     | -0.00430483 | 0.048941785 | -0.57361376 | 0.566237783 | 0.713293497 | -6.85332171 | ns |
| AZU1     | -0.00977643 | 0.066564546 | -0.57223172 | 0.56717372  | 0.714164408 | -6.84526034 | ns |
| MN1      | 0.006879232 | 0.082549626 | 0.571512684 | 0.567660662 | 0.714469454 | -6.85599716 | ns |
| IL32     | 0.005147085 | 0.009635475 | 0.57065602  | 0.568241193 | 0.714891979 | -6.86568641 | ns |
| CASP10   | -0.00910461 | -0.00639692 | -0.56982534 | 0.568804664 | 0.715292687 | -6.85717565 | ns |
| RBP7     | -0.00717778 | 0.042330818 | -0.56889117 | 0.569438263 | 0.7157812   | -6.86964518 | ns |
| SOX9     | -0.00310204 | -0.01590623 | -0.56763403 | 0.570291926 | 0.716249513 | -6.85818907 | ns |
| KYAT1    | -0.00704204 | 0.009767978 | -0.56761993 | 0.57030141  | 0.716249513 | -6.86416846 | ns |
| TMCO5A   | -0.00637469 | 0.040031296 | -0.56677651 | 0.570874446 | 0.716660956 | -6.85867166 | ns |
| FKBPL    | -0.00686814 | 0.027985797 | -0.56521529 | 0.57193554  | 0.717684476 | -6.8717137  | ns |
| NID1     | -0.00471922 | -0.02001742 | -0.56474448 | 0.572255862 | 0.717777972 | -6.86647541 | ns |
| CCN2     | 0.007195177 | -0.01454191 | 0.559585109 | 0.575770647 | 0.721699012 | -6.87003316 | ns |
| HDAC8    | -0.00723738 | 0.127582516 | -0.55909708 | 0.576103792 | 0.721699012 | -6.86093298 | ns |
| BTNL10   | 0.004513041 | 0.049262722 | 0.559068326 | 0.576123424 | 0.721699012 | -6.85979171 | ns |
| PDGFA    | -0.00881606 | -0.04660387 | -0.55791431 | 0.576910954 | 0.722303874 | -6.87740894 | ns |
| MRPL52   | -0.00291425 | -0.00228687 | -0.55716156 | 0.577425367 | 0.722303874 | -6.85946303 | ns |
| IL6R     | 0.004206915 | -0.02117648 | 0.556946522 | 0.577572185 | 0.722303874 | -6.86688201 | ns |

|           |             |             |             |             |             |             |    |
|-----------|-------------|-------------|-------------|-------------|-------------|-------------|----|
| LILRA3    | 0.015892623 | -0.39521281 | 0.556907754 | 0.577598506 | 0.722303874 | -6.87693768 | ns |
| SERPINI1  | 0.00341743  | 0.028351068 | 0.556241464 | 0.578054033 | 0.722303874 | -6.86382525 | ns |
| RANBP1    | -0.0061106  | 0.010970865 | -0.55618819 | 0.578090464 | 0.722303874 | -6.86392991 | ns |
| KCNH2     | 0.008612623 | 0.214804303 | 0.55457972  | 0.579190369 | 0.723160349 | -6.86545668 | ns |
| DMP1      | 0.006831349 | 0.010928345 | 0.554461527 | 0.579271252 | 0.723160349 | -6.86488126 | ns |
| KIAA1549  | 0.007803933 | -0.01014461 | 0.553595748 | 0.579863644 | 0.72359053  | -6.87141423 | ns |
| FES       | -0.00576083 | 0.018532069 | -0.55212746 | 0.580869234 | 0.724535738 | -6.86613846 | ns |
| PRR5      | -0.00533073 | 0.03743917  | -0.55117951 | 0.581518814 | 0.725036267 | -6.86529384 | ns |
| ADAMTSL4  | -0.00264758 | 0.001425792 | -0.55060085 | 0.58191548  | 0.725221171 | -6.86699771 | ns |
| LPO       | 0.007258495 | -0.00400836 | 0.54848317  | 0.583368413 | 0.726721743 | -6.86160047 | ns |
| DDT       | -0.00476075 | 0.017563997 | -0.54690644 | 0.584450892 | 0.727328055 | -6.88241542 | ns |
| IL34      | -0.00420618 | -0.02777598 | -0.54661777 | 0.584649467 | 0.727328055 | -6.86933773 | ns |
| H2AP      | -0.00583311 | 0.062393304 | -0.54636022 | 0.584826465 | 0.727328055 | -6.86676041 | ns |
| FOSB      | -0.00474502 | 0.025276102 | -0.54632381 | 0.584851463 | 0.727328055 | -6.87018879 | ns |
| CDAN1     | -0.00256075 | 0.008007341 | -0.54587184 | 0.585161894 | 0.727404312 | -6.88348569 | ns |
| NOS1      | -0.0062565  | -0.01122511 | -0.54543344 | 0.585463522 | 0.727469568 | -6.87067103 | ns |
| ITGA6     | -0.00633829 | 0.070687955 | -0.54466588 | 0.585991254 | 0.727815594 | -6.88006889 | ns |
| CD5L      | -0.00513152 | 0.013826106 | -0.54259892 | 0.587413838 | 0.729272282 | -6.88147464 | ns |
| DLGAP5    | -0.00584745 | 0.113455707 | -0.5421823  | 0.587700708 | 0.729318346 | -6.88646641 | ns |
| CPQ       | -0.00389301 | -0.01981516 | -0.54124651 | 0.588345487 | 0.729808336 | -6.88472874 | ns |
| ARNT      | -0.00442959 | 0.047674603 | -0.53940582 | 0.589614819 | 0.731045609 | -6.87392735 | ns |
| LILRB5    | 0.008465887 | -0.1654132  | 0.53907383  | 0.589843649 | 0.731045609 | -6.88766427 | ns |
| HSD11B1   | -0.00479984 | 0.013495465 | -0.53827421 | 0.59039556  | 0.731419192 | -6.88350323 | ns |
| TSPYL1    | -0.00443684 | 0.030297154 | -0.53709571 | 0.591209454 | 0.732116882 | -6.87289723 | ns |
| CEACAM18  | -0.00727577 | 0.137896503 | -0.52986804 | 0.596211135 | 0.737997675 | -6.88416892 | ns |
| C1QTNF9   | 0.005314369 | -0.03522758 | 0.528933544 | 0.596859313 | 0.738486946 | -6.87881718 | ns |
| HS6ST1    | -0.00380105 | 0.001433456 | -0.52695889 | 0.598229668 | 0.739868967 | -6.89519175 | ns |
| BHLHE40   | -0.00764346 | 0.084472553 | -0.52553657 | 0.599217968 | 0.740777505 | -6.88134678 | ns |
| MYOC      | -0.00531378 | -0.01576526 | -0.52484582 | 0.599697944 | 0.740995618 | -6.89097121 | ns |
| AKR1B10   | -0.00643987 | 0.019895561 | -0.52455261 | 0.599901931 | 0.740995618 | -6.88153168 | ns |
| HSD17B14  | -0.00657665 | -0.01463328 | -0.52301181 | 0.600973514 | 0.742005353 | -6.89561008 | ns |
| PDE4D     | 0.00649103  | 0.136357609 | 0.520993438 | 0.602379017 | 0.743168419 | -6.88189526 | ns |
| AHSA1     | -0.00720248 | 0.104091082 | -0.5209278  | 0.602424537 | 0.743168419 | -6.89575164 | ns |
| ELAVL4    | -0.00901824 | 0.071513876 | -0.51961138 | 0.603342089 | 0.743986022 | -6.88441895 | ns |
| DNER      | 0.002988404 | 0.008813408 | 0.519015571 | 0.603757389 | 0.744183864 | -6.8911136  | ns |
| RARRES1   | 0.003806213 | 0.017547976 | 0.51863568  | 0.604022452 | 0.744196439 | -6.88392904 | ns |
| SERPINC1  | -0.00155968 | 0.002459017 | -0.51757004 | 0.604765698 | 0.744797908 | -6.89653855 | ns |
| GHR       | -0.00329653 | -0.02835094 | -0.51714827 | 0.605060214 | 0.744846469 | -6.88568867 | ns |
| C5        | -0.00158225 | -0.00710707 | -0.515384   | 0.606292067 | 0.746048392 | -6.89928717 | ns |
| GLI2      | -0.00353092 | 0.027447968 | -0.51416228 | 0.607146095 | 0.746422018 | -6.88485713 | ns |
| CPOX      | 0.002766516 | 0.008684269 | 0.513818157 | 0.607386683 | 0.746422018 | -6.88503262 | ns |
| PRKAG3    | -0.00343188 | 0.025996868 | -0.51327113 | 0.607769175 | 0.746422018 | -6.88734003 | ns |
| TPRKB     | 0.006748421 | 0.082619474 | 0.51313113  | 0.607867142 | 0.746422018 | -6.88422495 | ns |
| PARD3     | -0.00778815 | 0.088625529 | -0.51312141 | 0.607873822 | 0.746422018 | -6.8928347  | ns |
| SERPINA5  | 0.003406715 | 0.018690177 | 0.511995023 | 0.608661913 | 0.747075572 | -6.89271029 | ns |
| TGFBI     | -0.00300609 | -0.01174741 | -0.51047245 | 0.609727939 | 0.748069572 | -6.8914929  | ns |
| IVD       | -0.00549113 | -0.00277769 | -0.50760797 | 0.611735729 | 0.750137517 | -6.89043138 | ns |
| LARP1     | -0.00666779 | 0.079535597 | -0.50711438 | 0.612081805 | 0.750137517 | -6.9027979  | ns |
| ZPR1      | -0.00996071 | 0.223972318 | -0.50696877 | 0.612184145 | 0.750137517 | -6.89085761 | ns |
| TXNL1     | -0.01047112 | 0.30466603  | -0.50606997 | 0.612814944 | 0.750479571 | -6.89049526 | ns |
| TPMT      | 0.008050233 | 0.073347866 | 0.505838671 | 0.612977321 | 0.750479571 | -6.89043286 | ns |
| PTH1R     | 0.004247363 | 0.036501877 | 0.504500258 | 0.613917125 | 0.751315174 | -6.90097747 | ns |
| SSB       | -0.00625714 | 0.078825803 | -0.50263562 | 0.61522783  | 0.752205374 | -6.89292341 | ns |
| CST1      | 0.010501533 | 0.048081719 | 0.502537161 | 0.615297911 | 0.752205374 | -6.83664612 | ns |
| RAP1A     | 0.006922742 | 0.117862017 | 0.501988324 | 0.615683085 | 0.752205374 | -6.8909939  | ns |
| GKN1      | -0.00300689 | -0.02270903 | -0.50176212 | 0.615842221 | 0.752205374 | -6.89174226 | ns |
| BLNK      | -0.0039088  | 0.001154452 | -0.5016337  | 0.615932551 | 0.752205374 | -6.89117045 | ns |
| FUT3_FUT5 | -0.00494636 | -0.02595265 | -0.50030951 | 0.616864261 | 0.752796684 | -6.9081336  | ns |
| CDH4      | -0.00483617 | 0.042352424 | -0.4999174  | 0.617140536 | 0.752796684 | -6.89437986 | ns |
| CD6       | 0.00587847  | -0.03912866 | 0.499796783 | 0.617225267 | 0.752796684 | -6.90769335 | ns |
| CELA3A    | 0.006145886 | 0.035984228 | 0.499480576 | 0.617447965 | 0.752796684 | -6.90690021 | ns |
| CD209     | 0.004268818 | 0.0383518   | 0.497035316 | 0.619171249 | 0.754582657 | -6.90495438 | ns |
| RLN1      | 0.007332901 | 0.178978    | 0.49608733  | 0.619839822 | 0.754989885 | -6.91021422 | ns |
| NINJ1     | -0.0062425  | 0.09235126  | -0.49564169 | 0.620154475 | 0.754989885 | -6.89549896 | ns |
| SMC3      | 0.005582961 | 0.048593028 | 0.495448613 | 0.620290734 | 0.754989885 | -6.89307195 | ns |
| UXS1      | -0.00557099 | 0.002101821 | -0.49509594 | 0.620539631 | 0.754989885 | -6.89576719 | ns |

|             |             |             |             |             |             |             |    |
|-------------|-------------|-------------|-------------|-------------|-------------|-------------|----|
| TCP11       | -0.0060576  | 0.119664768 | -0.49317923 | 0.621893045 | 0.756321404 | -6.90279108 | ns |
| RPS10       | 0.003984711 | 0.03458539  | 0.491801167 | 0.622867093 | 0.757190637 | -6.89656232 | ns |
| PTK7        | -0.00400701 | -0.0118655  | -0.48874818 | 0.625027101 | 0.759463662 | -6.89975355 | ns |
| DARS1       | -0.00793329 | -0.04285026 | -0.48836602 | 0.625297634 | 0.759463662 | -6.90452369 | ns |
| ECE1        | 0.003753912 | -0.01220863 | 0.488056166 | 0.62551716  | 0.759463662 | -6.90008889 | ns |
| GPR101      | 0.006088221 | 0.112691005 | 0.487213158 | 0.626114365 | 0.759872795 | -6.90060128 | ns |
| KLF4        | -0.00412185 | 0.003301661 | -0.48482203 | 0.627809635 | 0.760907071 | -6.90175434 | ns |
| SHPK        | -0.00417608 | 0.068751513 | -0.48467174 | 0.627916171 | 0.760907071 | -6.90691847 | ns |
| APRT        | -0.00516053 | -0.04580861 | -0.48462456 | 0.62794964  | 0.760907071 | -6.90763184 | ns |
| ADAM15      | -0.0032312  | 0.009517776 | -0.48435766 | 0.628139103 | 0.760907071 | -6.90190592 | ns |
| ECSCR       | -0.0051593  | 0.102597749 | -0.48417388 | 0.628269503 | 0.760907071 | -6.90206592 | ns |
| PODXL       | -0.00160357 | -0.00496073 | -0.48344982 | 0.628783302 | 0.761177319 | -6.90854475 | ns |
| CD200       | -0.00277859 | 0.016014069 | -0.4829193  | 0.629159928 | 0.761177319 | -6.91155049 | ns |
| CSNK1D      | -0.00630053 | 0.102801037 | -0.4827579  | 0.629274674 | 0.761177319 | -6.90038818 | ns |
| ANXA2       | -0.00707498 | 0.022895266 | -0.48105231 | 0.630486406 | 0.761854504 | -6.89541147 | ns |
| TERF1       | -0.00279769 | 0.013963673 | -0.48067763 | 0.63075263  | 0.761854504 | -6.90138242 | ns |
| WIF1        | -0.00362491 | 0.005403827 | -0.48060956 | 0.630800791 | 0.761854504 | -6.91836477 | ns |
| MEGF9       | 0.002208763 | -0.00403363 | 0.480500788 | 0.630878147 | 0.761854504 | -6.9151895  | ns |
| NID2        | -0.00788586 | 0.02735187  | -0.47914436 | 0.631842754 | 0.762703944 | -6.91373731 | ns |
| DEFB118     | -0.00574817 | 0.098682971 | -0.47844361 | 0.632341437 | 0.762990494 | -6.90480242 | ns |
| KEL         | 0.003795537 | -0.00622713 | 0.477332793 | 0.633132086 | 0.763406439 | -6.90522459 | ns |
| SNX18       | -0.00434731 | 0.09396236  | -0.47675097 | 0.633546202 | 0.763406439 | -6.91745068 | ns |
| DCN         | -0.00222786 | -0.00308751 | -0.47641093 | 0.633788557 | 0.763406439 | -6.90569361 | ns |
| FGF6        | -0.00388889 | 0.044644467 | -0.47626511 | 0.633892439 | 0.763406439 | -6.90347713 | ns |
| PDIA3       | -0.00251578 | -0.00153876 | -0.47612336 | 0.633993361 | 0.763406439 | -6.90590405 | ns |
| FUCA1       | -0.00868033 | -0.2108768  | -0.47513886 | 0.634694721 | 0.763935938 | -6.9176663  | ns |
| EDF1        | -0.00671278 | 0.083597385 | -0.46944097 | 0.638761061 | 0.768257882 | -6.92298049 | ns |
| ABHD14B     | -0.00588016 | 0.007687654 | -0.4693703  | 0.638811691 | 0.768257882 | -6.91354977 | ns |
| PDCD6       | -0.00725184 | -0.18521749 | -0.46689505 | 0.640581608 | 0.770069286 | -6.91680186 | ns |
| SCN3A       | 0.003534352 | 0.037731567 | 0.465418529 | 0.641638473 | 0.771022362 | -6.91057355 | ns |
| NEO1        | -0.00211756 | 0.00300611  | -0.46442875 | 0.642347108 | 0.771556378 | -6.9253031  | ns |
| LRP2BP      | -0.00791571 | 0.218250407 | -0.46142269 | 0.644502014 | 0.773826431 | -6.91241084 | ns |
| TNFSF14     | -0.00597571 | -0.01293491 | -0.46004054 | 0.645493675 | 0.774698533 | -6.91915409 | ns |
| TMOD4       | 0.003824667 | -0.0037945  | 0.459481251 | 0.645895261 | 0.774862023 | -6.91011011 | ns |
| MANEAL      | 0.00480149  | -0.01158438 | 0.457688629 | 0.647182777 | 0.775588348 | -6.91092572 | ns |
| SERPINF2    | -0.00128376 | 0.00282687  | -0.45758244 | 0.64725901  | 0.775588348 | -6.91735633 | ns |
| CASQ2       | 0.004517197 | 0.063475369 | 0.457528916 | 0.647297536 | 0.775588348 | -6.91270272 | ns |
| DNLZ        | 0.008521474 | 0.235143263 | 0.454336952 | 0.649592864 | 0.778019345 | -6.91595778 | ns |
| IL2RB       | -0.00372234 | 0.031361709 | -0.45392914 | 0.649886354 | 0.778051723 | -6.91604936 | ns |
| TPT1        | -0.00658693 | 0.091322776 | -0.45320613 | 0.650406825 | 0.778355709 | -6.91637473 | ns |
| PRKCQ       | -0.00432761 | 0.043364403 | -0.45160852 | 0.651557511 | 0.778955559 | -6.91709186 | ns |
| VAMP5       | -0.00529763 | 0.07240875  | -0.45125513 | 0.651812172 | 0.778955559 | -6.91727062 | ns |
| SMNDC1      | -0.00579228 | 0.040771788 | -0.45111531 | 0.651912771 | 0.778955559 | -6.92925327 | ns |
| BST1        | 0.004743636 | -0.13496272 | 0.451028754 | 0.651975132 | 0.778955559 | -6.93139701 | ns |
| GSR         | -0.002054   | -0.00752614 | -0.44843358 | 0.653846629 | 0.780872048 | -6.92714872 | ns |
| GLRX        | 0.005721075 | 0.00327093  | 0.447567876 | 0.654471457 | 0.781298714 | -6.92326633 | ns |
| PLCB1       | -0.00417317 | 0.069120084 | -0.44657863 | 0.65518576  | 0.781715889 | -6.91706771 | ns |
| TJP3        | -0.00383215 | 0.033083203 | -0.44634241 | 0.655356334 | 0.781715889 | -6.91952995 | ns |
| TMEM25      | -0.00402534 | 0.030939852 | -0.44537741 | 0.656053245 | 0.782189986 | -6.93390385 | ns |
| CPA1        | -0.00572289 | 0.018610704 | -0.4450504  | 0.656289543 | 0.782189986 | -6.93357809 | ns |
| SERPINE2    | -0.0058127  | 0.019631934 | -0.44356895 | 0.657360458 | 0.78265936  | -6.93376727 | ns |
| DENND2B     | 0.004532377 | 0.084360074 | 0.443520647 | 0.657395572 | 0.78265936  | -6.91896437 | ns |
| SIRT1       | -0.00811199 | 0.197516286 | -0.44339357 | 0.657487469 | 0.78265936  | -6.91847391 | ns |
| ITPRIP      | -0.00420934 | 0.085454469 | -0.4424731  | 0.658153235 | 0.782949781 | -6.92123608 | ns |
| PF4         | -0.00875782 | -0.05642136 | -0.44231471 | 0.658267709 | 0.782949781 | -6.93005911 | ns |
| RAB39B      | -0.00827721 | 0.211991087 | -0.43992036 | 0.660001113 | 0.783859185 | -6.92054223 | ns |
| NCLN        | -0.00526502 | 0.102801357 | -0.4397372  | 0.660133747 | 0.783859185 | -6.92234129 | ns |
| TNPO1       | -0.00322675 | 0.009632085 | -0.43969533 | 0.660164011 | 0.783859185 | -6.92754524 | ns |
| CRTAM       | -0.00484668 | -0.01534863 | -0.43953593 | 0.660279473 | 0.783859185 | -6.92830567 | ns |
| PPM1A       | -0.00304723 | 0.023008063 | -0.43940486 | 0.660374519 | 0.783859185 | -6.92158538 | ns |
| BOLA2_BOLA2 | 0.005034145 | -0.02938422 | 0.436815852 | 0.662251157 | 0.785427419 | -6.92273492 | ns |
| SEZ6L2      | 0.002232916 | 0.005849029 | 0.436501906 | 0.662478777 | 0.785427419 | -6.92997318 | ns |
| NPTXR       | -0.00329664 | 0.046595402 | -0.43646899 | 0.662502648 | 0.785427419 | -6.93043893 | ns |
| SERPINA12   | -0.01057449 | 0.197030936 | -0.4359229  | 0.662898991 | 0.78557835  | -6.91737923 | ns |
| DPEP2       | -0.00247311 | -0.00543528 | -0.43515114 | 0.663458864 | 0.785922873 | -6.93055734 | ns |
| MTHFD2      | 0.002275837 | 0.013441766 | 0.433840754 | 0.664410123 | 0.786516281 | -6.93794739 | ns |

|          |             |             |             |             |             |             |    |
|----------|-------------|-------------|-------------|-------------|-------------|-------------|----|
| IGDCC4   | -0.0022975  | 0.023081224 | -0.43337559 | 0.664747967 | 0.786516281 | -6.93763785 | ns |
| EIF4B    | -0.00543958 | -0.04025364 | -0.43331323 | 0.66479335  | 0.786516281 | -6.93100047 | ns |
| PKLR     | -0.0064639  | 0.06966314  | -0.43297746 | 0.665037226 | 0.786516281 | -6.93361112 | ns |
| MRI1     | 0.006057948 | -0.07440542 | 0.432331176 | 0.665506899 | 0.786753095 | -6.92530965 | ns |
| ICAM4    | -0.00510919 | -0.0441496  | -0.43137037 | 0.666205153 | 0.787259833 | -6.93493516 | ns |
| PPIE     | -0.00540065 | 0.125400629 | -0.42944422 | 0.667606041 | 0.788596133 | -6.93196565 | ns |
| JMJD1C   | 0.005038693 | 0.054007275 | 0.428193594 | 0.668516318 | 0.789200767 | -6.92388762 | ns |
| PVR      | -0.0033437  | -0.01870719 | -0.42799809 | 0.668658458 | 0.789200767 | -6.9414425  | ns |
| SMARCA2  | -0.00600315 | 0.053405972 | -0.42741634 | 0.669082216 | 0.789381847 | -6.92762927 | ns |
| HS3ST3B1 | 0.003503788 | -0.00308259 | 0.426390224 | 0.669829523 | 0.789944349 | -6.9343022  | ns |
| NPL      | 0.003884801 | -0.04347188 | 0.42432244  | 0.671336569 | 0.791402012 | -6.94205572 | ns |
| ACSL1    | 0.003214402 | 0.04898679  | 0.422112132 | 0.67294921  | 0.792982927 | -6.92815776 | ns |
| NAGK     | -0.00493815 | 0.008383735 | -0.42145722 | 0.673427265 | 0.793226145 | -6.92814531 | ns |
| MORC3    | -0.00240216 | 0.020092046 | -0.42046798 | 0.674149445 | 0.793481178 | -6.9436162  | ns |
| NTRK2    | 0.002336834 | -0.00515125 | 0.420250287 | 0.674308521 | 0.793481178 | -6.93733287 | ns |
| PKD1     | 0.002207241 | -0.01444359 | 0.420044187 | 0.674459001 | 0.793481178 | -6.9438482  | ns |
| OMP      | -0.00418906 | 0.061522709 | -0.41959409 | 0.674787986 | 0.793548498 | -6.93102076 | ns |
| NUDT10   | 0.002074484 | 0.022348909 | 0.419067001 | 0.675173136 | 0.793681786 | -6.93027101 | ns |
| TMED4    | -0.00482359 | 0.08490461  | -0.41703868 | 0.676656073 | 0.795104923 | -6.93026979 | ns |
| RUVBL1   | 0.009569929 | 0.285223451 | 0.412400546 | 0.68005174  | 0.798620547 | -6.93299668 | ns |
| EPHA10   | 0.005789068 | 0.094182104 | 0.412205096 | 0.680194966 | 0.798620547 | -6.93396529 | ns |
| GIMAP8   | 0.004324687 | 0.021448399 | 0.411646054 | 0.680604743 | 0.798780487 | -6.93078166 | ns |
| PLG      | 0.001873389 | -0.0213721  | 0.411074912 | 0.681023456 | 0.79895078  | -6.93326779 | ns |
| S100A14  | -0.00438837 | 0.084926831 | -0.4102483  | 0.681629477 | 0.799340592 | -6.94881851 | ns |
| IGBP1    | -0.00516978 | 0.021935775 | -0.40814851 | 0.683170279 | 0.800825859 | -6.94967122 | ns |
| DUSP29   | -0.00539017 | 0.098036284 | -0.40544668 | 0.685154945 | 0.802830031 | -6.93648335 | ns |
| ALDH5A1  | -0.00382891 | 0.044616667 | -0.40223815 | 0.687514307 | 0.805271471 | -6.95204789 | ns |
| GH1      | 0.016319706 | 0.313304763 | 0.401808919 | 0.687830276 | 0.805318527 | -6.94425001 | ns |
| SHBG     | -0.00443639 | 0.033412638 | -0.40114747 | 0.688317091 | 0.805398489 | -6.95036276 | ns |
| MDM1     | -0.00259841 | 0.006545231 | -0.40094483 | 0.68846641  | 0.805398489 | -6.9382843  | ns |
| MYOM2    | 0.004070483 | 0.048417307 | 0.400592262 | 0.688726037 | 0.805398489 | -6.9369407  | ns |
| POLR2A   | -0.00242628 | 0.012630235 | -0.39847837 | 0.690283261 | 0.806896366 | -6.93723212 | ns |
| SOX2     | 0.001894798 | -0.00078117 | 0.397730146 | 0.690834595 | 0.807067134 | -6.95250311 | ns |
| SIGLEC15 | 0.006958677 | 0.215549695 | 0.397530222 | 0.690982135 | 0.807067134 | -6.93986031 | ns |
| TAP1     | -0.00483623 | 0.077547711 | -0.39642464 | 0.691797333 | 0.807696206 | -6.94549528 | ns |
| CTSF     | 0.003479386 | -0.00066035 | 0.395141574 | 0.692743869 | 0.808357784 | -6.95156742 | ns |
| IL20RA   | -0.00394952 | 0.052029597 | -0.39490626 | 0.692917648 | 0.808357784 | -6.94090423 | ns |
| FHIP2A   | 0.003876686 | 0.014918149 | 0.39414925  | 0.693476442 | 0.80852427  | -6.93948092 | ns |
| PPME1    | -0.00535614 | -0.01763579 | -0.3939626  | 0.693614142 | 0.80852427  | -6.94750075 | ns |
| NFKB2    | 0.00461476  | 0.103181734 | 0.392853204 | 0.694433391 | 0.808931999 | -6.94689382 | ns |
| MAGEA3   | 0.006747988 | -0.08175182 | 0.392714585 | 0.69453578  | 0.808931999 | -6.94694785 | ns |
| AMIGO1   | -0.00413987 | 0.071392548 | -0.39202278 | 0.695046908 | 0.808931999 | -6.94179414 | ns |
| CSPG5    | -0.00394949 | 0.057561548 | -0.39198877 | 0.69507205  | 0.808931999 | -6.94213537 | ns |
| ST13     | -0.00456371 | -0.0014959  | -0.39062273 | 0.696081617 | 0.809784192 | -6.9426686  | ns |
| CAMLG    | 0.004360631 | 0.086588549 | 0.389314651 | 0.697048884 | 0.810280429 | -6.94284386 | ns |
| TF       | -0.00173663 | -0.00701648 | -0.38929516 | 0.697063164 | 0.810280429 | -6.95588822 | ns |
| NRTN     | -0.00420878 | -0.00696535 | -0.38651252 | 0.699122576 | 0.812350944 | -6.94415815 | ns |
| LACRT    | -0.00391067 | 0.134445009 | -0.38340748 | 0.701422942 | 0.814699678 | -6.95657938 | ns |
| ST8SIA1  | -0.00392025 | 0.0905163   | -0.38267188 | 0.701968477 | 0.815009126 | -6.94335736 | ns |
| SH3GLB2  | 0.005359254 | -0.01082004 | 0.381055942 | 0.703166961 | 0.816076123 | -6.95929099 | ns |
| NGT1     | -0.00413943 | 0.068466667 | -0.37923588 | 0.704518034 | 0.816571363 | -6.94668665 | ns |
| ITM2A    | -0.00494224 | -0.00060033 | -0.37895792 | 0.704724352 | 0.816571363 | -6.95600807 | ns |
| IMPACT   | -0.00442694 | -0.00900124 | -0.37815709 | 0.705319075 | 0.816571363 | -6.96038305 | ns |
| PRDX2    | 0.004971645 | 0.061656396 | 0.377968286 | 0.705459431 | 0.816571363 | -6.95131768 | ns |
| RABGAP1L | 0.005022938 | 0.039207529 | 0.377960609 | 0.705465167 | 0.816571363 | -6.9474015  | ns |
| DTX2     | -0.00502774 | 0.139973222 | -0.3778386  | 0.705555803 | 0.816571363 | -6.94721145 | ns |
| JCHAIN   | 0.005140767 | -0.03091229 | 0.377822116 | 0.705568052 | 0.816571363 | -6.94745343 | ns |
| DNAJC9   | -0.00602611 | -0.0158368  | -0.37746821 | 0.705830864 | 0.816571363 | -6.9595322  | ns |
| EZR      | -0.00203022 | -0.02376248 | -0.37141083 | 0.710336631 | 0.821458599 | -6.9638891  | ns |
| ITGB6    | -0.00245673 | -0.00077488 | -0.36909328 | 0.712063373 | 0.823129473 | -6.95068785 | ns |
| IGLON5   | -0.00694142 | 0.259901331 | -0.36843806 | 0.712551812 | 0.823368141 | -6.94750221 | ns |
| DUSP3    | -0.00697472 | 0.133040328 | -0.36787819 | 0.712969229 | 0.823524585 | -6.95111974 | ns |
| GNAS     | -0.006588   | 0.228743839 | -0.36692531 | 0.713679733 | 0.823889965 | -6.96552555 | ns |
| PYY      | -0.00720176 | 0.091013097 | -0.36669745 | 0.713849867 | 0.823889965 | -6.94984247 | ns |
| GJA8     | -0.00451913 | 0.059133844 | -0.36507781 | 0.715058463 | 0.824667675 | -6.94872493 | ns |
| COL3A1   | 0.00169873  | -0.00211634 | 0.364641561 | 0.715383966 | 0.824667675 | -6.96485465 | ns |

|            |             |              |             |             |             |             |    |
|------------|-------------|--------------|-------------|-------------|-------------|-------------|----|
| IL17F      | -0.00627839 | 0.155523911  | -0.36435372 | 0.715598986 | 0.824667675 | -6.9524124  | ns |
| EBI3_IL27  | -0.00242046 | 0.003729888  | -0.36411998 | 0.715773385 | 0.824667675 | -6.96642549 | ns |
| YOD1       | 0.004811042 | 0.005495756  | 0.363891834 | 0.715943901 | 0.824667675 | -6.95085933 | ns |
| SFRP1      | -0.0034167  | -0.05033451  | -0.36349739 | 0.716238418 | 0.824667675 | -6.95597863 | ns |
| PNLIPRP1   | -0.005612   | -0.00369922  | -0.36257693 | 0.716925889 | 0.824667675 | -6.96610958 | ns |
| PNMA1      | -0.00414703 | 0.061157013  | -0.36252705 | 0.716963298 | 0.824667675 | -6.95219397 | ns |
| PDGFB      | -0.00686601 | -0.07750377  | -0.36239012 | 0.717065489 | 0.824667675 | -6.96329992 | ns |
| KDR        | -0.00203233 | -0.01898273  | -0.36026532 | 0.718653664 | 0.826150862 | -6.96463973 | ns |
| NEK7       | -0.00551399 | 0.112703258  | -0.35971172 | 0.719067703 | 0.826150862 | -6.9592681  | ns |
| SATB1      | 0.00224607  | 0.036292245  | 0.359529458 | 0.719203935 | 0.826150862 | -6.96819155 | ns |
| STC2       | -0.00202907 | -0.00342332  | -0.35891347 | 0.719664749 | 0.826355119 | -6.96373169 | ns |
| RBP1       | -0.00521098 | 0.140594665  | -0.3580434  | 0.720315833 | 0.826777607 | -6.95443807 | ns |
| CPA2       | -0.00505407 | 0.031789948  | -0.35617255 | 0.721716218 | 0.827812552 | -6.96691371 | ns |
| EXO2       | 0.00367826  | 0.098420301  | 0.35608153  | 0.721784506 | 0.827812552 | -6.95364893 | ns |
| ENDOU      | -0.0037922  | 0.032050028  | -0.35539492 | 0.722298971 | 0.828077345 | -6.93330132 | ns |
| CLEC12A    | -0.00140119 | -0.00314861  | -0.35297407 | 0.724112826 | 0.829698499 | -6.9541953  | ns |
| GOT1       | -0.00291018 | 0.016197126  | -0.35274913 | 0.724281327 | 0.829698499 | -6.96908796 | ns |
| SSC5D      | -0.00343162 | -0.05329165  | -0.35172035 | 0.725052828 | 0.830256572 | -6.96504471 | ns |
| MMP15      | 0.003416498 | 0.08078203   | 0.349681526 | 0.726582474 | 0.831682017 | -6.97072238 | ns |
| PTPRB      | -0.00208257 | -0.0190152   | -0.34889555 | 0.72717247  | 0.831996303 | -6.97099483 | ns |
| LY75       | 0.003009886 | -0.02239787  | 0.348556723 | 0.727426904 | 0.831996303 | -6.966982   | ns |
| MUC2       | 0.00656326  | 0.023005902  | 0.347075817 | 0.728539078 | 0.832942094 | -6.97105802 | ns |
| SEMA7A     | -0.00201929 | 0.004378665  | -0.34646994 | 0.728994291 | 0.833136333 | -6.97018665 | ns |
| KCNC4      | 0.0040067   | 0.109911548  | 0.345634585 | 0.729622173 | 0.833527678 | -6.959098   | ns |
| FGF20      | 0.003047503 | 0.08274584   | 0.343649877 | 0.731114416 | 0.834665687 | -6.95741758 | ns |
| MME        | 0.006003925 | 0.083099284  | 0.343549261 | 0.731190009 | 0.834665687 | -6.96594775 | ns |
| ITGB2      | 0.002143919 | 0.001628109  | 0.342939175 | 0.731648973 | 0.834863229 | -6.9624175  | ns |
| CLEC4C     | -0.00348094 | -0.00674288  | -0.34051958 | 0.733469944 | 0.836279507 | -6.96972989 | ns |
| RICTOR     | 0.003393106 | 0.077930817  | 0.340218368 | 0.73369684  | 0.836279507 | -6.95858174 | ns |
| FLT3       | 0.002331292 | 0.013453869  | 0.340148633 | 0.733749348 | 0.836279507 | -6.95997077 | ns |
| APLP1      | -0.00378195 | 0.060587433  | -0.33948455 | 0.734249394 | 0.836387226 | -6.96777697 | ns |
| MLLT1      | -0.00474403 | 0.080641185  | -0.33891149 | 0.734681145 | 0.836387226 | -6.957863   | ns |
| CORO6      | -0.00254746 | 0.031450729  | -0.33888224 | 0.734703163 | 0.836387226 | -6.96139103 | ns |
| HEBP1      | 0.003898252 | 0.021654101  | 0.337547619 | 0.735708824 | 0.837205676 | -6.96176714 | ns |
| VEGFC      | -0.0040768  | -0.02186157  | -0.33621029 | 0.736716865 | 0.838026196 | -6.97295265 | ns |
| HAVCR1     | 0.004347042 | -0.07149016  | 0.334787205 | 0.737790143 | 0.838920256 | -6.9767615  | ns |
| TEF        | 0.002937656 | 0.016446648  | 0.332343042 | 0.739634876 | 0.840690478 | -6.96175605 | ns |
| VEGFD      | 0.002650674 | 0.020503335  | 0.331175538 | 0.740516373 | 0.841127157 | -6.97712637 | ns |
| NECTIN1    | 0.00221865  | 0.008548204  | 0.331071386 | 0.740595179 | 0.841127157 | -6.96162782 | ns |
| STAU1      | -0.00464235 | -0.141479601 | -0.32970017 | 0.741631125 | 0.841976239 | -6.96091821 | ns |
| FCRL3      | 0.00390632  | -0.02485141  | 0.328229946 | 0.742742357 | 0.842201413 | -6.9648242  | ns |
| TOR1AIP1   | -0.0034831  | 0.021777381  | -0.32766685 | 0.743168122 | 0.842201413 | -6.96413012 | ns |
| MORN4      | -0.00530205 | 0.11814595   | -0.3276584  | 0.743174524 | 0.842201413 | -6.96158403 | ns |
| PROC       | 0.001838576 | -0.0123426   | 0.327553136 | 0.743254034 | 0.842201413 | -6.97258973 | ns |
| ITGB5      | -0.00265584 | 0.024052368  | -0.32752988 | 0.74327159  | 0.842201413 | -6.97581143 | ns |
| AMY2A      | -0.00344109 | 0.014897039  | -0.32672393 | 0.743881387 | 0.842565419 | -6.94842229 | ns |
| DNPH1      | -0.00376609 | 0.001263057  | -0.32532529 | 0.744939312 | 0.84317883  | -6.97529251 | ns |
| DPEP1      | 0.003539519 | -0.05640025  | 0.325244533 | 0.745000473 | 0.84317883  | -6.9703693  | ns |
| DPP6       | 0.002390384 | 0.021483137  | 0.322713805 | 0.746916407 | 0.845019724 | -6.97283523 | ns |
| AOC3       | -0.00211832 | -0.00902145  | -0.32052915 | 0.748571601 | 0.846283715 | -6.9754484  | ns |
| CSR3       | 0.006329036 | 0.120643488  | 0.320474252 | 0.7486133   | 0.846283715 | -6.96559981 | ns |
| UHRF2      | 0.002297544 | 0.026746076  | 0.319959285 | 0.749003642 | 0.846397305 | -6.96576342 | ns |
| RNF4       | 0.004342297 | 0.127070525  | 0.317512238 | 0.750859297 | 0.848166014 | -6.97344706 | ns |
| COL28A1    | 0.0048657   | 0.109267738  | 0.316927909 | 0.751302681 | 0.848338681 | -6.96820569 | ns |
| CD3G       | -0.00591976 | 0.247847091  | -0.31522247 | 0.752597121 | 0.849471819 | -6.96670923 | ns |
| STX7       | -0.00334563 | -0.01084607  | -0.31437033 | 0.753244146 | 0.849873612 | -6.96697537 | ns |
| REPS1      | 0.00251133  | 0.031770094  | 0.312239592 | 0.754862775 | 0.851370916 | -6.96763772 | ns |
| INSL3      | 0.004698879 | 0.640485637  | 0.310681061 | 0.756047274 | 0.852126446 | -6.9834465  | ns |
| ANGPT1     | 0.005809504 | -0.07270749  | 0.310590335 | 0.756116309 | 0.852126446 | -6.97615399 | ns |
| PSME1      | -0.00259032 | -0.00260616  | -0.30959497 | 0.756873203 | 0.852650368 | -6.97660182 | ns |
| ALMS1      | 0.002811525 | 0.03938938   | 0.308669505 | 0.757577155 | 0.853114266 | -6.97619427 | ns |
| ERCC1      | -0.00204441 | 0.004867171  | -0.30770714 | 0.75830945  | 0.853609713 | -6.96787243 | ns |
| TMPPRSS11B | -0.00487557 | 0.181872052  | -0.30703626 | 0.758820011 | 0.853855273 | -6.97159579 | ns |
| LTB        | -0.00215379 | 0.01994736   | -0.3065542  | 0.759186848 | 0.853938982 | -6.98377122 | ns |
| SLC1A4     | -0.00331029 | 0.083987891  | -0.30598391 | 0.75962111  | 0.854082913 | -6.97158767 | ns |
| KRT5       | 0.003238689 | 0.027792833  | 0.305617918 | 0.759899798 | 0.854082913 | -6.97192224 | ns |



|         |             |             |             |             |             |             |    |
|---------|-------------|-------------|-------------|-------------|-------------|-------------|----|
| VIM     | 0.007714843 | -0.15861497 | 0.304396127 | 0.760830322 | 0.854411255 | -6.97232486 | ns |
| RSPO1   | -0.00230019 | -0.0177006  | -0.30397434 | 0.761151584 | 0.854411255 | -6.97831285 | ns |
| LELP1   | 0.0045789   | 0.057995305 | 0.303817325 | 0.761271259 | 0.854411255 | -6.97257128 | ns |
| CTLA4   | -0.00184132 | -0.0199997  | -0.30369761 | 0.761362358 | 0.854411255 | -6.98506537 | ns |
| NBN     | 0.003350933 | 0.041310369 | 0.297334098 | 0.76621554  | 0.859197402 | -6.97441251 | ns |
| DCTPP1  | -0.00197996 | -0.01273703 | -0.29733373 | 0.766215765 | 0.859197402 | -6.98109491 | ns |
| IL2RG   | -0.00215992 | 0.025331718 | -0.29615989 | 0.767111962 | 0.859606235 | -6.98687978 | ns |
| C1QTNF6 | -0.00189856 | 0.015246609 | -0.29594064 | 0.767279375 | 0.859606235 | -6.98887382 | ns |
| KHDC3L  | -0.00402661 | 0.114029158 | -0.2956997  | 0.767463512 | 0.859606235 | -6.97146667 | ns |
| SCN3B   | -0.00290507 | 0.065220673 | -0.29224734 | 0.770101539 | 0.862230251 | -6.97599262 | ns |
| ASS1    | -0.004669   | 0.017910722 | -0.29120532 | 0.770898313 | 0.862531798 | -6.97448137 | ns |
| CNTN1   | 0.001730207 | 0.024234468 | 0.291122348 | 0.770961641 | 0.862531798 | -6.98980677 | ns |
| LYSMD3  | 0.006107689 | 0.162853046 | 0.290191965 | 0.771673364 | 0.862997404 | -6.97625833 | ns |
| EPGN    | 0.002846447 | 0.100676841 | 0.289518951 | 0.772188165 | 0.863242512 | -6.98880971 | ns |
| EREG    | -0.0050601  | 0.055358132 | -0.28616098 | 0.774758722 | 0.865784718 | -6.98222493 | ns |
| CRHR1   | -0.00386992 | 0.068512175 | -0.28516045 | 0.775525138 | 0.866309642 | -6.97795091 | ns |
| CSPG4   | 0.00190508  | 0.004740762 | 0.283269043 | 0.776974393 | 0.867596645 | -6.99101522 | ns |
| SEPTIN8 | -0.00185018 | -0.00304184 | -0.27952314 | 0.779847118 | 0.870471554 | -6.99209984 | ns |
| PLA2G2A | 0.00340945  | 0.038841251 | 0.277245638 | 0.781595246 | 0.871801018 | -6.98714931 | ns |
| PTPN9   | 0.002191632 | 0.02560713  | 0.277193568 | 0.781635297 | 0.871801018 | -6.97672549 | ns |
| CD164L2 | 0.002066071 | 0.023539022 | 0.27654833  | 0.782130725 | 0.872020511 | -6.98009437 | ns |
| HYAL1   | -0.00134844 | -0.01284062 | -0.27063823 | 0.786672961 | 0.876750018 | -6.98559048 | ns |
| PNLIP   | 0.003324809 | 0.042523442 | 0.270040689 | 0.787132551 | 0.876927527 | -6.99402635 | ns |
| PFDN4   | -0.00302357 | 0.061249285 | -0.26889875 | 0.788011293 | 0.877571692 | -6.97897316 | ns |
| PDXDC1  | -0.00300718 | 0.082029105 | -0.26516745 | 0.79088411  | 0.880435227 | -6.97996172 | ns |
| CDK1    | -0.00199562 | -0.01174814 | -0.26446796 | 0.79142298  | 0.880699352 | -6.98014551 | ns |
| DXD1    | 0.002701651 | 0.089173718 | 0.263124775 | 0.792457914 | 0.88151509  | -6.99587714 | ns |
| ATF4    | 0.001864657 | 0.019725045 | 0.26201742  | 0.793311604 | 0.881934582 | -6.98078553 | ns |
| CCL17   | -0.00521892 | -0.08126845 | -0.26185198 | 0.793439091 | 0.881934582 | -6.99015334 | ns |
| CRYBB2  | -0.00354432 | 0.138784028 | -0.26093961 | 0.794142548 | 0.882380609 | -6.99755513 | ns |
| GAD1    | 0.001406736 | -0.00547326 | 0.259784287 | 0.795033732 | 0.882450699 | -6.98136358 | ns |
| ENPP5   | 0.002512163 | -0.014431   | 0.259774235 | 0.795041396 | 0.882450699 | -6.99497798 | ns |
| TLR3    | -0.00352049 | -0.12203715 | -0.2595574  | 0.795208637 | 0.882450699 | -6.9988719  | ns |
| OSTN    | 0.002263958 | 0.042508414 | 0.259290725 | 0.795414466 | 0.882450699 | -6.98468196 | ns |
| INSR    | 0.000865056 | 0.002053235 | 0.256361832 | 0.797674964 | 0.884106131 | -6.98339938 | ns |
| EXOSC10 | 0.003130434 | 0.148431382 | 0.256284303 | 0.797734824 | 0.884106131 | -6.98396603 | ns |
| BOLA1   | 0.002867533 | 0.01293374  | 0.256180512 | 0.797814951 | 0.884106131 | -6.98580555 | ns |
| STX1B   | -0.00223579 | 0.03973848  | -0.2549787  | 0.798743016 | 0.88453432  | -6.98578208 | ns |
| NPHS1   | -0.00178004 | 0.008526345 | -0.25489564 | 0.798807192 | 0.88453432  | -6.98377124 | ns |
| CD33    | -0.00448595 | -0.21778005 | -0.25373865 | 0.799700849 | 0.885188203 | -6.99709403 | ns |
| PITHD1  | 0.004201675 | 0.174158417 | 0.252904958 | 0.800345127 | 0.885565658 | -6.9816668  | ns |
| SHD     | 0.004397097 | 0.212118268 | 0.250549229 | 0.80216607  | 0.88724429  | -6.98445514 | ns |
| CDA     | -0.00244645 | 0.005324099 | -0.24956934 | 0.802923729 | 0.887746039 | -6.9993884  | ns |
| B4GAT1  | 0.001359821 | 0.014502876 | 0.249134696 | 0.803259921 | 0.887781593 | -6.99685166 | ns |
| SUSD2   | -0.00154892 | 0.000705283 | -0.2483193  | 0.803890688 | 0.888142569 | -6.99705292 | ns |
| SFTPD   | -0.00360335 | -0.00148899 | -0.24641956 | 0.805360768 | 0.889430198 | -6.99483079 | ns |
| NLGN2   | 0.002449607 | 0.090306197 | 0.244796371 | 0.806617435 | 0.890481251 | -6.98863492 | ns |
| CHIT1   | -0.00819235 | -0.33566846 | -0.24434083 | 0.806970124 | 0.890533924 | -6.99750564 | ns |
| LYPLA2  | -0.00535859 | 0.294517046 | -0.24278122 | 0.808178189 | 0.891530152 | -6.98912237 | ns |
| IGDCC3  | -0.00235488 | 0.07706132  | -0.23962738 | 0.810622398 | 0.893348287 | -6.98987716 | ns |
| HNF1A   | -0.00359282 | 0.140364752 | -0.23926736 | 0.810901516 | 0.893348287 | -6.98963443 | ns |
| VSTM2L  | -0.00302452 | 0.021654526 | -0.23925495 | 0.810911152 | 0.893348287 | -6.98989385 | ns |
| AK1     | 0.003439724 | 0.007444219 | 0.239075672 | 0.811050106 | 0.893348287 | -6.99659979 | ns |
| GLT8D2  | -0.00241632 | 0.061756019 | -0.2385152  | 0.811484772 | 0.89349002  | -6.99003631 | ns |
| PHLDB2  | 0.004525166 | 0.156974196 | 0.237049927 | 0.81262129  | 0.894031202 | -6.98696685 | ns |
| CTSB    | -0.00284246 | 0.074758993 | -0.23669604 | 0.812895774 | 0.894031202 | -6.9978609  | ns |
| ATP5F1D | 0.002635634 | 0.04692515  | 0.236548533 | 0.813010275 | 0.894031202 | -6.98879121 | ns |
| SCGB3A2 | 0.004335484 | 0.052983151 | 0.236302641 | 0.813200984 | 0.894031202 | -6.99957859 | ns |
| ARID4B  | 0.002154821 | 0.039316032 | 0.233567044 | 0.815324288 | 0.895692459 | -6.99119517 | ns |
| TSPAN7  | -0.00465414 | 0.292569993 | -0.23258169 | 0.816089406 | 0.895692459 | -6.99152771 | ns |
| NME3    | -0.00117944 | 0.003821683 | -0.23246913 | 0.816176762 | 0.895692459 | -6.99949389 | ns |
| GLP1R   | -0.00174964 | 0.040982294 | -0.23246137 | 0.816182843 | 0.895692459 | -6.99155547 | ns |
| F12     | 0.001987558 | -0.05682967 | 0.232380239 | 0.816245765 | 0.895692459 | -7.00429255 | ns |
| CDH22   | -0.0013506  | 0.013496106 | -0.23106752 | 0.817265442 | 0.896474489 | -6.99697501 | ns |
| CALY    | 0.001753903 | 0.022474385 | 0.230357901 | 0.817816806 | 0.896532387 | -6.99022513 | ns |
| MSLN    | -0.00174055 | 0.029639386 | -0.23020925 | 0.817932288 | 0.896532387 | -6.99174413 | ns |

|           |             |             |             |             |             |             |    |
|-----------|-------------|-------------|-------------|-------------|-------------|-------------|----|
| FCN1      | -0.00263281 | -0.06135624 | -0.22884466 | 0.818992682 | 0.897175101 | -7.00311928 | ns |
| TRIM26    | -0.00261767 | 0.028640413 | -0.22866404 | 0.819133157 | 0.897175101 | -6.98890424 | ns |
| ADAMTS16  | -0.00157352 | 0.003784119 | -0.22701442 | 0.820415613 | 0.89816596  | -6.9927253  | ns |
| NDRG1     | -0.00348105 | 0.134455926 | -0.22670912 | 0.820653007 | 0.89816596  | -6.99276114 | ns |
| MPRIP     | -0.00204596 | -0.02048133 | -0.2246551  | 0.822250571 | 0.899577246 | -7.0047705  | ns |
| HMGCS1    | 0.001994088 | 0.023525376 | 0.222444684 | 0.823970752 | 0.901121571 | -6.99200268 | ns |
| FABP6     | -0.00262623 | 0.047857735 | -0.22125108 | 0.824899934 | 0.901800003 | -6.99400698 | ns |
| SHH       | 0.001965324 | 0.006178161 | 0.220223749 | 0.825699892 | 0.902243856 | -6.99194338 | ns |
| ARHGAP30  | 0.001824837 | 0.08474333  | 0.219574033 | 0.826205852 | 0.902243856 | -6.99954475 | ns |
| CFHR4     | 0.003263859 | -0.10948649 | 0.219539256 | 0.826232901 | 0.902243856 | -7.00633365 | ns |
| RIPK4     | 0.003029612 | 0.172018718 | 0.218188337 | 0.827285333 | 0.903055392 | -6.99293308 | ns |
| DCUN1D2   | 0.003586404 | 0.144878423 | 0.215989591 | 0.828998794 | 0.904587622 | -6.99169999 | ns |
| BSND      | -0.00153307 | 0.025292972 | -0.21505472 | 0.829727574 | 0.904716374 | -6.9918999  | ns |
| LAG3      | -0.00188572 | 0.011541399 | -0.21484353 | 0.829892178 | 0.904716374 | -7.00160521 | ns |
| ATXN2     | -0.00497678 | 0.226510673 | -0.21452269 | 0.830142373 | 0.904716374 | -6.99553338 | ns |
| RAC3      | 0.002991529 | 0.160196769 | 0.214248555 | 0.830356124 | 0.904716374 | -6.9952634  | ns |
| FAM171A2  | 0.006867275 | 0.39026599  | 0.210871935 | 0.832989972 | 0.907247564 | -7.01026736 | ns |
| CHRM1     | -0.00160219 | 0.020869204 | -0.20937976 | 0.834154614 | 0.907903786 | -6.99628664 | ns |
| PLA2G10   | -0.0027828  | 0.023106515 | -0.20930098 | 0.834216076 | 0.907903786 | -7.0024224  | ns |
| ANXA1     | 0.001846843 | -0.02239906 | 0.208402532 | 0.834917499 | 0.907903786 | -6.99378533 | ns |
| CR1       | -0.00153011 | -0.00605057 | -0.20826603 | 0.835024009 | 0.907903786 | -7.00640604 | ns |
| SYAP1     | -0.00241359 | 0.062045785 | -0.20810842 | 0.835147113 | 0.907903786 | -6.99688109 | ns |
| C1QTNF5   | 0.001600636 | 0.003171889 | 0.20680024  | 0.836168649 | 0.908092604 | -6.99715036 | ns |
| TRAF3     | -0.00158902 | 0.046941262 | -0.20643682 | 0.836452511 | 0.908092604 | -6.99486152 | ns |
| DDX39A    | 0.000939528 | 0.007271949 | 0.20631391  | 0.836548507 | 0.908092604 | -6.99488669 | ns |
| FABP2     | -0.00355453 | 0.057176035 | -0.20600744 | 0.836787837 | 0.908092604 | -7.00390224 | ns |
| CBX2      | -0.00167662 | 0.065873713 | -0.20589496 | 0.836875753 | 0.908092604 | -6.9955194  | ns |
| NT5E      | -0.00249835 | 0.037834143 | -0.20324636 | 0.838945154 | 0.909999944 | -7.00854312 | ns |
| PPP1R12B  | 0.002992832 | 0.110767768 | 0.200850688 | 0.840818003 | 0.911639535 | -7.00345027 | ns |
| LRTM1     | -0.00171669 | 0.042338354 | -0.20042982 | 0.841147139 | 0.911639535 | -6.99810622 | ns |
| TP53INP1  | -0.00144031 | 0.047242235 | -0.19966716 | 0.841743592 | 0.911639535 | -6.99851411 | ns |
| COL4A1    | 0.001742192 | 0.018352175 | 0.198931694 | 0.842318819 | 0.911639535 | -7.00532385 | ns |
| FGF2      | -0.00294399 | 0.05881199  | -0.19877238 | 0.842443439 | 0.911639535 | -7.00765876 | ns |
| CLEC10A   | 0.001557126 | -0.01148855 | 0.198729789 | 0.842476767 | 0.911639535 | -7.00456247 | ns |
| F13B      | -0.00103774 | -0.01699364 | -0.19850831 | 0.842650006 | 0.911639535 | -7.00800208 | ns |
| TIMP3     | -0.0057165  | 0.089397347 | -0.19811927 | 0.842954364 | 0.911639535 | -7.00898587 | ns |
| CYP24A1   | -0.00344443 | 0.218778828 | -0.19679482 | 0.843990765 | 0.912422448 | -6.99733734 | ns |
| SEPTIN3   | -0.00298655 | -0.00302157 | -0.19455303 | 0.845745424 | 0.913980991 | -7.01355034 | ns |
| CLSPN     | -0.00153092 | 0.036394742 | -0.19404015 | 0.846147068 | 0.914050783 | -6.99825923 | ns |
| PTPRF     | 0.001205308 | -0.01171792 | 0.19367096  | 0.846436068 | 0.914050783 | -7.01324945 | ns |
| VCPKMT    | 0.003471482 | 0.200195614 | 0.193038751 | 0.84693123  | 0.91424739  | -6.99635693 | ns |
| GALNT7    | 0.000873901 | -0.00772705 | 0.191484647 | 0.848148449 | 0.915019422 | -7.00631436 | ns |
| GAGE2A    | -0.00248619 | 0.102086336 | -0.19132553 | 0.848273142 | 0.915019422 | -6.99668359 | ns |
| ZNF174    | 0.001426901 | 0.051263643 | 0.18995334  | 0.849348258 | 0.915227084 | -6.99810289 | ns |
| OLFM4     | -0.00481399 | -0.15120375 | -0.18953021 | 0.849679923 | 0.915227084 | -6.98189921 | ns |
| IFNW1     | 0.001368607 | 0.040090482 | 0.189505656 | 0.849699081 | 0.915227084 | -6.99873423 | ns |
| IL1B      | -0.00232922 | 0.051392367 | -0.1894415  | 0.849749364 | 0.915227084 | -6.99769513 | ns |
| DSG2      | -0.00111005 | 0.024864908 | -0.18907973 | 0.850032826 | 0.915227084 | -7.00990947 | ns |
| RPGR      | 0.001624959 | 0.026118205 | 0.187726476 | 0.851093594 | 0.91549808  | -7.00055244 | ns |
| TPBGL     | -0.001608   | 0.053055573 | -0.18739657 | 0.851352224 | 0.91549808  | -7.00061383 | ns |
| SCGB3A1   | -0.00098414 | 0.007533294 | -0.18731503 | 0.851416146 | 0.91549808  | -7.00096015 | ns |
| LILRA6    | -0.0028098  | -0.08383911 | -0.18715874 | 0.851538625 | 0.91549808  | -7.01401545 | ns |
| PLA2G7    | -0.00127589 | -0.01671476 | -0.18638769 | 0.852143204 | 0.915583654 | -7.01041099 | ns |
| UROD      | -0.0026855  | 0.00481737  | -0.18624488 | 0.852255222 | 0.915583654 | -7.00115848 | ns |
| KRT17     | 0.001482454 | -0.00040967 | 0.185857666 | 0.852558889 | 0.915583654 | -6.99941354 | ns |
| KIR3DL2   | -0.00322402 | 0.221900985 | -0.18300908 | 0.854793362 | 0.917309484 | -6.99822795 | ns |
| SF3B4     | -0.00304155 | 0.043033013 | -0.18300794 | 0.854794214 | 0.917309484 | -7.00788938 | ns |
| S100P     | -0.00214163 | 0.033779393 | -0.18178021 | 0.855757663 | 0.917623743 | -7.00189899 | ns |
| KIAA1549L | -0.00105102 | 0.009595429 | -0.18159548 | 0.855902604 | 0.917623743 | -7.00710391 | ns |
| PXDNL     | 0.002156856 | 0.078730815 | 0.181433354 | 0.85602982  | 0.917623743 | -7.01406764 | ns |
| SIGLEC9   | 0.001169651 | -0.02995732 | 0.179213892 | 0.857772098 | 0.919101618 | -7.01644088 | ns |
| CD58      | -0.00069226 | -0.00246532 | -0.17887526 | 0.858038017 | 0.919101618 | -7.00837214 | ns |
| INPP5J    | -0.00152813 | 0.024664776 | -0.17765013 | 0.85900007  | 0.919794722 | -7.01667216 | ns |
| TMEM132A  | -0.00230485 | 0.003499861 | -0.17676516 | 0.859695231 | 0.920101702 | -7.00189269 | ns |
| ZP4       | -0.00123341 | 0.038133797 | -0.17648289 | 0.859916968 | 0.920101702 | -6.9993918  | ns |
| PCDH1     | 0.000783008 | 0.012253928 | 0.175466323 | 0.860715526 | 0.920618804 | -7.0157146  | ns |

|          |             |             |             |             |             |             |    |
|----------|-------------|-------------|-------------|-------------|-------------|-------------|----|
| LCAT     | 0.000825483 | -0.02928045 | 0.173816557 | 0.862011905 | 0.921421039 | -7.01521871 | ns |
| PSMG4    | 0.002096628 | 0.064253249 | 0.173708786 | 0.862096671 | 0.921421039 | -7.00103353 | ns |
| HIP1     | -0.00118307 | 0.038352973 | -0.17091989 | 0.864289058 | 0.92342629  | -7.00205743 | ns |
| SRPX     | -0.00121277 | -0.02342491 | -0.17021721 | 0.864841539 | 0.923678601 | -7.01701971 | ns |
| GSTT2B   | 0.00830035  | -0.51650693 | 0.169524034 | 0.865386682 | 0.923922892 | -7.01708126 | ns |
| AMFR     | -0.00241299 | 0.073026188 | -0.16797555 | 0.866604767 | 0.924885204 | -7.00426142 | ns |
| PAEP     | 0.004983412 | 0.603761557 | 0.166651242 | 0.867646679 | 0.925262734 | -7.01037777 | ns |
| SAP18    | 0.002497869 | 0.092825761 | 0.166499999 | 0.867765689 | 0.925262734 | -7.00971098 | ns |
| PRKD2    | 0.001622501 | 0.08054571  | 0.166317769 | 0.86790912  | 0.925262734 | -7.00282737 | ns |
| CEND1    | 0.001980402 | 0.07432179  | 0.165612811 | 0.868463885 | 0.925431651 | -7.00475713 | ns |
| PREB     | -0.00106534 | 0.001283572 | -0.16511639 | 0.868854581 | 0.925431651 | -7.00474626 | ns |
| TRAF3IP2 | -0.00158538 | 0.067928226 | -0.16454804 | 0.869301943 | 0.925431651 | -7.00311785 | ns |
| ENO2     | -0.00239121 | 0.024600322 | -0.1645056  | 0.869335281 | 0.925431651 | -7.01891076 | ns |
| DDA1     | 0.001368131 | 0.034767663 | 0.164055247 | 0.869689858 | 0.925471714 | -7.00319818 | ns |
| CDH15    | -0.0020141  | 0.121763737 | -0.16331264 | 0.870274416 | 0.925756392 | -7.0178205  | ns |
| RLN2     | -0.00413018 | 0.209122159 | -0.16279753 | 0.870680031 | 0.925850579 | -7.00446893 | ns |
| HBEGF    | 0.002615227 | -0.02610994 | 0.16125834  | 0.871892038 | 0.926801875 | -7.01870542 | ns |
| HSPB6    | -0.0013142  | -0.02650018 | -0.15901028 | 0.873662844 | 0.928346253 | -7.02043644 | ns |
| LAMA1    | -0.00171684 | 0.125759385 | -0.15584459 | 0.876157615 | 0.930002121 | -7.00450121 | ns |
| SEPTIN7  | -0.00171098 | 0.063744073 | -0.15583778 | 0.876162947 | 0.930002121 | -7.01141614 | ns |
| CLEC4G   | 0.001153768 | -0.01516147 | 0.15582038  | 0.876176656 | 0.930002121 | -7.01521571 | ns |
| TNR      | -0.00145262 | 0.04344359  | -0.15503204 | 0.876798106 | 0.930323572 | -7.01223223 | ns |
| PRL      | 0.002446534 | 0.108852202 | 0.154169452 | 0.877478134 | 0.93070692  | -7.02054522 | ns |
| DGCR6    | -0.0013793  | 0.039580816 | -0.15341974 | 0.878069333 | 0.930824815 | -7.00668697 | ns |
| WFIKN2   | 0.001216935 | 0.029312183 | 0.153219952 | 0.878226837 | 0.930824815 | -7.01465944 | ns |
| COL4A4   | -0.00164237 | -0.0504766  | -0.15230577 | 0.878947787 | 0.931250921 | -7.01116129 | ns |
| ADAMTS13 | -0.00074446 | 0.008123303 | -0.15037786 | 0.880468464 | 0.932506179 | -7.02064043 | ns |
| RBM19    | -0.00145332 | 0.061012731 | -0.14952537 | 0.881141099 | 0.932506179 | -7.00545851 | ns |
| AGBL2    | -0.00282077 | -0.08226005 | -0.1492006  | 0.881397338 | 0.932506179 | -7.00732039 | ns |
| ANGPTL7  | -0.00116698 | -0.01204065 | -0.14912148 | 0.881459715 | 0.932506179 | -7.02194844 | ns |
| GSN      | 0.000556018 | 0.004596979 | 0.14853009  | 0.881926383 | 0.932506179 | -7.01764861 | ns |
| CRTAC1   | 0.000974292 | -0.03935703 | 0.148375132 | 0.882048653 | 0.932506179 | -7.02093732 | ns |
| SLK      | -0.00243817 | 0.186272559 | -0.14726274 | 0.882926587 | 0.932592172 | -7.01270567 | ns |
| CDC25A   | -0.00124944 | 0.022917025 | -0.14712338 | 0.883036661 | 0.932592172 | -7.00410498 | ns |
| CD14     | -0.00130835 | -0.0185986  | -0.14705812 | 0.883088136 | 0.932592172 | -7.00022777 | ns |
| ENOX2    | 0.000831707 | 0.017814115 | 0.146284875 | 0.883698467 | 0.932899322 | -7.00593405 | ns |
| SPARC    | -0.00226688 | -0.10878091 | -0.14490419 | 0.884788406 | 0.933712377 | -7.01862158 | ns |
| SCP2     | 0.002468731 | 0.213841977 | 0.144136972 | 0.885394241 | 0.934014156 | -7.00706289 | ns |
| RBM17    | -0.00221639 | 0.027297952 | -0.14292883 | 0.886348248 | 0.934295216 | -7.02219545 | ns |
| WDR46    | -0.00110379 | 0.006255983 | -0.14258502 | 0.886619786 | 0.934295216 | -7.02031355 | ns |
| SNED1    | 0.000922146 | 0.001627895 | 0.142357269 | 0.886799715 | 0.934295216 | -7.00734    | ns |
| PDCL2    | 0.001552535 | 0.067610293 | 0.142178998 | 0.886940527 | 0.934295216 | -7.00481458 | ns |
| IL4      | 0.002765067 | -0.15304078 | 0.140420156 | 0.888329906 | 0.93540022  | -7.00848965 | ns |
| ACOX1    | 0.001504113 | 0.023873932 | 0.140040025 | 0.888630209 | 0.93540022  | -7.0152284  | ns |
| PPBP     | -0.00240876 | -0.07303779 | -0.13933454 | 0.889187623 | 0.935649679 | -7.01691881 | ns |
| SMPDL3A  | 0.001965467 | -0.0438468  | 0.137160133 | 0.890906017 | 0.937120161 | -7.01847153 | ns |
| HADH     | 0.001812738 | 0.121435639 | 0.135145264 | 0.892498832 | 0.938457541 | -7.0074893  | ns |
| TNXB     | -0.00074084 | 0.005160074 | -0.13366118 | 0.893672257 | 0.939353129 | -7.01878399 | ns |
| GTF2IRD1 | 0.002017853 | 0.201916723 | 0.132887074 | 0.894284441 | 0.939658355 | -7.01470381 | ns |
| ZCCHC8   | -0.0016347  | 0.078328402 | -0.13225089 | 0.894787622 | 0.939848869 | -7.00787325 | ns |
| MNDA     | -0.00289577 | 0.086793132 | -0.13145036 | 0.895420783 | 0.940175724 | -7.01638544 | ns |
| GPIHBP1  | -0.00186483 | -0.08396748 | -0.12988043 | 0.896662715 | 0.941032984 | -7.02186074 | ns |
| FAM171B  | -0.00071    | 0.026016658 | -0.12960355 | 0.896881779 | 0.941032984 | -7.02206682 | ns |
| CLU      | 0.00082853  | 0.027943405 | 0.126784808 | 0.899112365 | 0.943034521 | -7.02311159 | ns |
| ESR1     | 0.001527078 | 0.099098763 | 0.126243442 | 0.899540913 | 0.94314523  | -7.00809647 | ns |
| COL1A1   | 0.000699916 | 0.012764636 | 0.125727367 | 0.899949367 | 0.943192871 | -7.02401769 | ns |
| RRP15    | -0.00236479 | 0.006131283 | -0.12523266 | 0.900341035 | 0.943192871 | -7.01058357 | ns |
| GABRA4   | -0.00165188 | 0.120533067 | -0.12496189 | 0.900555385 | 0.943192871 | -7.01061717 | ns |
| THAP12   | 0.002336139 | 0.18956309  | 0.123123628 | 0.902010852 | 0.944369121 | -7.00587549 | ns |
| SCARB1   | 0.001577291 | 0.101875395 | 0.122726532 | 0.90232529  | 0.944369121 | -7.01078715 | ns |
| S100A13  | 0.000875624 | -0.01072207 | 0.122021932 | 0.902883279 | 0.944404526 | -7.00861639 | ns |
| BRME1    | 0.00103379  | 0.022215792 | 0.121779687 | 0.903075125 | 0.944404526 | -7.01100671 | ns |
| PPM1B    | -0.00157779 | 0.110689739 | -0.12145864 | 0.903329397 | 0.944404526 | -7.00868443 | ns |
| FH       | 0.00203081  | 0.175841777 | 0.116559254 | 0.90721088  | 0.948123039 | -7.01162398 | ns |
| LMOD1    | -0.0007918  | 0.004095823 | -0.11456998 | 0.908787456 | 0.949430902 | -7.02581897 | ns |
| CHL1     | -0.00077092 | 0.032665862 | -0.11325654 | 0.909828652 | 0.950178706 | -7.02005956 | ns |

|             |             |             |             |             |             |             |    |
|-------------|-------------|-------------|-------------|-------------|-------------|-------------|----|
| F2          | -0.00034408 | -0.00502788 | -0.11259614 | 0.910352203 | 0.950385567 | -7.02479694 | ns |
| GGT5        | 0.000523309 | -0.00087408 | 0.111638271 | 0.911111693 | 0.950838508 | -7.01797359 | ns |
| FBP1        | -0.00181796 | -0.01463605 | -0.11107933 | 0.911554893 | 0.950867678 | -7.01883673 | ns |
| AOC1        | 0.001380674 | 0.084091405 | 0.110105552 | 0.912327128 | 0.950867678 | -7.01225736 | ns |
| UBQLN3      | -0.00107751 | 0.065592933 | -0.11006629 | 0.912358273 | 0.950867678 | -7.01054009 | ns |
| C1QBP       | -0.00153556 | 0.112604731 | -0.1099604  | 0.912442203 | 0.950867678 | -7.02633254 | ns |
| BLVRB       | -0.00161833 | 0.066930919 | -0.10783195 | 0.914130402 | 0.952287112 | -7.02187893 | ns |
| CEP112      | -0.00096658 | 0.066259552 | -0.10595593 | 0.915618735 | 0.953497399 | -7.01098058 | ns |
| PFDN6       | -0.00141592 | 0.110482804 | -0.10467063 | 0.91663856  | 0.953841077 | -7.01260041 | ns |
| CLSTN2      | 0.000885988 | 0.021206573 | 0.104360791 | 0.916884385 | 0.953841077 | -7.02689732 | ns |
| ITIH4       | 0.000550223 | 0.006965556 | 0.104304907 | 0.916928734 | 0.953841077 | -7.02568893 | ns |
| ATG4A       | -0.0013784  | 0.029637334 | -0.10357311 | 0.917509512 | 0.954105333 | -7.01204771 | ns |
| IL1RL1      | -0.00104643 | -0.03532132 | -0.10176952 | 0.918940937 | 0.955014762 | -7.024611   | ns |
| REST        | 0.000763765 | 0.023897697 | 0.101629222 | 0.91905234  | 0.955014762 | -7.00971898 | ns |
| DYNC1H1     | 0.000990021 | 0.047359834 | 0.101234986 | 0.919365238 | 0.955014762 | -7.02531619 | ns |
| NPPB        | 0.002747334 | -0.10626043 | 0.099397149 | 0.920824268 | 0.955920059 | -7.01339086 | ns |
| NUDT15      | 0.001044367 | 0.061754334 | 0.098915196 | 0.921206922 | 0.955920059 | -7.01169616 | ns |
| LRRC37A2    | 0.000867774 | 0.009153847 | 0.098900125 | 0.921218852 | 0.955920059 | -7.02537762 | ns |
| CIT         | -0.00093449 | 0.040308686 | -0.09681535 | 0.922874314 | 0.956944662 | -7.0133856  | ns |
| TOP1MT      | -0.00098874 | 0.038744892 | -0.09641923 | 0.923188908 | 0.956944662 | -7.01023084 | ns |
| GALNT10     | -0.00058226 | -0.01727252 | -0.09641855 | 0.923189422 | 0.956944662 | -7.01989395 | ns |
| CD34        | -0.00049895 | 0.007987352 | -0.0954146  | 0.923986758 | 0.957431275 | -7.02653731 | ns |
| ADGRB3      | 0.000681649 | 0.013372381 | 0.093574811 | 0.92544815  | 0.958605391 | -7.01877568 | ns |
| CA2         | 0.001471464 | 0.022368739 | 0.092999967 | 0.925904806 | 0.958738309 | -7.02119289 | ns |
| TXN         | 0.000829825 | 0.030304596 | 0.091657243 | 0.926971576 | 0.95950266  | -7.01766198 | ns |
| DDX53       | 0.000678235 | 0.00335894  | 0.090848587 | 0.927614106 | 0.959530232 | -7.01394111 | ns |
| COL9A1      | 0.000894704 | 0.032680861 | 0.090796563 | 0.927655426 | 0.959530232 | -7.02317233 | ns |
| CLASP1      | 0.001351158 | 0.108088646 | 0.087778224 | 0.930054116 | 0.961309392 | -7.01102043 | ns |
| LYPD3       | 0.000642671 | 0.004749544 | 0.087760909 | 0.930067853 | 0.961309392 | -7.02236145 | ns |
| PDRG1       | -0.00095813 | 0.06402353  | -0.08738943 | 0.930363131 | 0.961309392 | -7.01424698 | ns |
| PADI4       | -0.0013957  | 0.078538967 | -0.08567114 | 0.931728987 | 0.962359238 | -7.01392493 | ns |
| CA3         | 0.001158987 | 0.016364658 | 0.085281966 | 0.932038331 | 0.962359238 | -7.02736942 | ns |
| ADD1        | -0.00124057 | 0.017132858 | -0.08458518 | 0.932592298 | 0.962392615 | -7.01481746 | ns |
| GRK5        | -0.000957   | 0.073062347 | -0.0844122  | 0.932729829 | 0.962392615 | -7.01475731 | ns |
| RALB        | 0.00051098  | -0.01002296 | 0.082412906 | 0.93431947  | 0.963692283 | -7.01263343 | ns |
| DKK4        | -0.00080369 | 0.009476416 | -0.08069234 | 0.935687686 | 0.964501738 | -7.01934128 | ns |
| CLEC3B      | -0.00035594 | 0.000759801 | -0.0805953  | 0.935764871 | 0.964501738 | -7.01575494 | ns |
| CCL28       | -0.00097719 | 0.041427269 | -0.07749764 | 0.938228686 | 0.966523478 | -7.02208667 | ns |
| GNPDA1      | -0.00051391 | 0.029462089 | -0.07729691 | 0.938388376 | 0.966523478 | -7.01442961 | ns |
| BMP4        | -0.00075234 | 0.039707954 | -0.07412202 | 0.940914264 | 0.968680204 | -7.02039418 | ns |
| RTKN2       | -0.00077442 | 0.068110995 | -0.07383105 | 0.941145801 | 0.968680204 | -7.01384582 | ns |
| CPA4        | 0.000648494 | -0.00519132 | 0.073013042 | 0.941796724 | 0.968868839 | -7.00424228 | ns |
| IL24        | 0.000773576 | 0.030004918 | 0.072766763 | 0.941992683 | 0.968868839 | -7.01564487 | ns |
| HCG22       | 0.0007902   | 0.06826037  | 0.071913824 | 0.942671445 | 0.96922557  | -7.01398444 | ns |
| IL10RA      | 0.000894849 | 0.098333949 | 0.070287377 | 0.94396586  | 0.970214822 | -7.01582083 | ns |
| PGM2        | 0.000863605 | 0.097148545 | 0.069266977 | 0.944778028 | 0.970707896 | -7.01565541 | ns |
| CYB5A       | 0.000991197 | 0.073296799 | 0.067129647 | 0.946479385 | 0.97196199  | -7.01260719 | ns |
| BCL7A       | 0.000864641 | 0.052545431 | 0.066735082 | 0.946793493 | 0.97196199  | -7.01263339 | ns |
| OGT         | 0.000884218 | 0.108604218 | 0.066479168 | 0.946997213 | 0.97196199  | -7.0212725  | ns |
| SOD3        | -0.0008082  | 0.093856886 | -0.06521041 | 0.948007313 | 0.972656836 | -7.02809984 | ns |
| THBS2       | 0.00048711  | 0.012417318 | 0.064355735 | 0.948687812 | 0.973013141 | -7.02559334 | ns |
| AMY1A_AMY1B | 0.000652983 | 0.02286981  | 0.063275306 | 0.949548152 | 0.97332429  | -6.99775086 | ns |
| NTproBNP    | -0.0013197  | 0.013750353 | -0.06290423 | 0.949843584 | 0.97332429  | -7.02299535 | ns |
| UPK3A       | 0.00065193  | 0.034600832 | 0.062718906 | 0.949991173 | 0.97332429  | -7.01641258 | ns |
| APOL1       | 0.000748123 | 0.088976768 | 0.060606759 | 0.951673173 | 0.974493559 | -7.02838725 | ns |
| KLK4        | -0.00078693 | 0.014642121 | -0.06040789 | 0.951831553 | 0.974493559 | -7.03117217 | ns |
| PROCR       | 0.000434773 | 0.035921165 | 0.060028664 | 0.952133604 | 0.974493559 | -7.01476238 | ns |
| C7orf50     | -0.00029291 | 0.021179467 | -0.05929918 | 0.952714579 | 0.974714069 | -7.02959652 | ns |
| DHODH       | -0.00057019 | 0.04496766  | -0.05839574 | 0.95343418  | 0.974714069 | -7.01485832 | ns |
| BEX3        | 0.000559848 | 0.045650722 | 0.057961311 | 0.953780217 | 0.974714069 | -7.01317613 | ns |
| ESPL1       | -0.00067328 | 0.103070526 | -0.05795878 | 0.95378223  | 0.974714069 | -7.01317628 | ns |
| EDIL3       | 0.000451663 | -0.00434516 | 0.05694389  | 0.954590647 | 0.974714069 | -7.01668359 | ns |
| YJU2        | 0.000382548 | 0.015210591 | 0.056682253 | 0.954799045 | 0.974714069 | -7.02880726 | ns |
| PSMC3       | 0.000357808 | 0.012868642 | 0.056518939 | 0.95492916  | 0.974714069 | -7.01325804 | ns |
| THBS4       | 0.000568472 | -0.02449886 | 0.056405511 | 0.955019503 | 0.974714069 | -7.02313674 | ns |
| PRAME       | -0.00027691 | -0.00051939 | -0.05279002 | 0.957899916 | 0.976650506 | -7.01346025 | ns |

|           |              |             |             |             |             |             |    |
|-----------|--------------|-------------|-------------|-------------|-------------|-------------|----|
| SDHB      | -0.0007309   | 0.110010598 | -0.05246981 | 0.958155031 | 0.976650506 | -7.02886497 | ns |
| ENPP7     | -0.00100168  | -0.08705465 | -0.05223837 | 0.958339461 | 0.976650506 | -7.00796806 | ns |
| SEMA4C    | -0.00031183  | 0.004560033 | -0.05217154 | 0.958392692 | 0.976650506 | -7.02315599 | ns |
| BATF      | -0.00091488  | 0.214586247 | -0.05192497 | 0.958589161 | 0.976650506 | -7.01669808 | ns |
| IL17RB    | -0.00058808  | 0.021288541 | -0.04921778 | 0.960746391 | 0.978417875 | -7.02035771 | ns |
| EIF4EBP1  | 0.000708066  | 0.012086571 | 0.048907068 | 0.960993995 | 0.978417875 | -7.02377185 | ns |
| LEFTY2    | -0.00054607  | 0.002759612 | -0.04790301 | 0.961794161 | 0.978576834 | -7.03107592 | ns |
| SYNGAP1   | 0.000565895  | 0.080529715 | 0.047870126 | 0.961820382 | 0.978576834 | -7.01722724 | ns |
| EPB41L5   | -0.00062227  | 0.057211143 | -0.04743933 | 0.962163709 | 0.978585172 | -7.0169192  | ns |
| SAT2      | -0.00065001  | 0.05538566  | -0.04569877 | 0.963550941 | 0.979654857 | -7.02242907 | ns |
| SLC16A1   | -0.00056263  | 0.072578494 | -0.04415446 | 0.96478187  | 0.980564936 | -7.01729216 | ns |
| MEPE      | -0.00023908  | -0.0170716  | -0.04354682 | 0.965266211 | 0.980715845 | -7.02396681 | ns |
| IL2       | -0.00029183  | -0.01581604 | -0.04246917 | 0.966125249 | 0.98124721  | -7.01737695 | ns |
| SKIV2L    | -0.00033184  | 0.03970892  | -0.04156418 | 0.966846682 | 0.981638495 | -7.01569298 | ns |
| NTF4      | -0.00035309  | 0.050154806 | -0.04026914 | 0.96787909  | 0.982345131 | -7.01656506 | ns |
| EIF1AX    | -0.00044276  | 0.097428929 | -0.03957553 | 0.968432046 | 0.982564828 | -7.03056421 | ns |
| PNMA2     | -0.00034426  | 0.013310812 | -0.03748603 | 0.970097972 | 0.983839534 | -7.01766696 | ns |
| TRPV3     | 0.000379553  | 0.049848417 | 0.037154539 | 0.97036228  | 0.983839534 | -7.01586518 | ns |
| AGT       | -0.00016472  | 0.029067909 | -0.0360659  | 0.971230278 | 0.98437779  | -7.02956444 | ns |
| ARG2      | -0.00030739  | 0.049651298 | -0.03512882 | 0.971977476 | 0.984793279 | -7.02978916 | ns |
| ADAMTS8   | 0.000338831  | 0.03360228  | 0.034346013 | 0.972601677 | 0.984846426 | -7.0284548  | ns |
| DPP4      | 0.000217779  | -0.0035965  | 0.033916517 | 0.972944174 | 0.984846426 | -7.01441783 | ns |
| MAP1LC3B2 | -0.00043726  | 0.15389875  | -0.03354482 | 0.973240573 | 0.984846426 | -7.01599179 | ns |
| ACAN      | -0.0002089   | -0.00876062 | -0.03337117 | 0.973379036 | 0.984846426 | -7.02091296 | ns |
| LTBP2     | -0.00021777  | -0.01365268 | -0.03257756 | 0.974011886 | 0.985145379 | -7.03133481 | ns |
| ZNF830    | 0.000517587  | 0.29561881  | 0.031110513 | 0.975181808 | 0.985987146 | -7.02992123 | ns |
| NMRK2     | 0.000250932  | 0.067304802 | 0.028896935 | 0.976947174 | 0.987430165 | -7.01442847 | ns |
| AMBN      | -0.00016397  | 0.017408876 | -0.0277688  | 0.977846918 | 0.987908837 | -7.01788919 | ns |
| LXN       | -0.0003884   | 0.101115315 | -0.02734801 | 0.978182525 | 0.987908837 | -7.0210497  | ns |
| SSNA1     | -0.00028347  | 0.035008125 | -0.02694773 | 0.978501772 | 0.987908837 | -7.02987071 | ns |
| MNAT1     | -0.00023978  | 0.041180447 | -0.02632443 | 0.978998917 | 0.987908837 | -7.02312139 | ns |
| DLL4      | -0.00046729  | 0.096239804 | -0.02618216 | 0.979112388 | 0.987908837 | -7.01705362 | ns |
| HRC       | -0.00017462  | 0.043459423 | -0.02528016 | 0.979831832 | 0.988293247 | -7.01707665 | ns |
| RANGAP1   | 0.000261044  | 0.059555221 | 0.023986732 | 0.98086351  | 0.988992213 | -7.0170841  | ns |
| B3GAT3    | 9.8308494339 | 0.005472928 | 0.023517626 | 0.981237691 | 0.98902798  | -7.01627564 | ns |
| OMD       | -0.00021223  | -0.00650596 | -0.02194677 | 0.982490699 | 0.98994922  | -7.02822264 | ns |
| MYL4      | 0.000229656  | 0.067817221 | 0.021272289 | 0.98302873  | 0.99010462  | -7.01716921 | ns |
| PINLYP    | -0.00028726  | -0.06601671 | -0.02070929 | 0.983477831 | 0.99010462  | -7.01815415 | ns |
| TDGF1     | 0.000652279  | 0.194851732 | 0.020478219 | 0.983662159 | 0.99010462  | -7.01805133 | ns |
| NPTX2     | 0.000133893  | -0.01579928 | 0.019949826 | 0.984083655 | 0.990128652 | -7.03063346 | ns |
| ALPI      | 0.000498253  | 0.218777755 | 0.019598144 | 0.984364204 | 0.990128652 | -7.01581225 | ns |
| TNFSF11   | -0.00023353  | 0.033923726 | -0.01708656 | 0.986367785 | 0.991657418 | -7.02711793 | ns |
| DUOX2     | -0.0002699   | 0.152954815 | -0.0168415  | 0.986563287 | 0.991657418 | -7.01815155 | ns |
| MMP1      | 0.000323726  | -0.08202117 | 0.015853657 | 0.987351356 | 0.991838475 | -7.00372043 | ns |
| INSL5     | 0.000309446  | 0.07745515  | 0.015764146 | 0.987422756 | 0.991838475 | -7.03010772 | ns |
| FZD10     | 0.000146179  | 0.078663035 | 0.012020265 | 0.990409606 | 0.994496578 | -7.01796399 | ns |
| BMP6      | 8.0901644579 | -0.01019986 | 0.008918352 | 0.992884397 | 0.996278337 | -7.01752499 | ns |
| LSM8      | -0.00015699  | 0.284035071 | -0.00879363 | 0.992983901 | 0.996278337 | -7.02342684 | ns |
| MYOM1     | -7.90E-05    | 0.053938588 | -0.00828464 | 0.993389995 | 0.996278337 | -7.01833003 | ns |
| PER3      | -0.00019296  | 0.093361329 | -0.00793315 | 0.993670432 | 0.996278337 | -7.01597157 | ns |
| LRRC38    | 7.1602661528 | 0.009561434 | 0.007308585 | 0.994168741 | 0.996278337 | -7.01800917 | ns |
| CYTH3     | 0.000110217  | 0.122892007 | 0.007230315 | 0.994231189 | 0.996278337 | -7.01481678 | ns |
| FCGR2B    | 8.0637117217 | 0.025043393 | 0.006329586 | 0.994949839 | 0.996379566 | -7.01734966 | ns |
| NUDT2     | -7.70E-05    | 0.044004771 | -0.00624834 | 0.995014663 | 0.996379566 | -7.02448708 | ns |
| GALNT5    | -1.53E-05    | -0.00234879 | -0.00280139 | 0.997764856 | 0.998791011 | -7.0313928  | ns |
| IKZF2     | -1.70E-05    | 0.245988819 | -0.00082966 | 0.999338037 | 0.999863924 | -7.01736919 | ns |
| SMAD5     | -8.09E-07    | -0.03768428 | -0.00017902 | 0.999857162 | 0.999863924 | -7.02450644 | ns |
| ACTA2     | -1.59E-06    | 0.001956434 | -0.00017055 | 0.999863924 | 0.999863924 | -7.01829225 | ns |
