# Supplementary material for: Artificial intelligence driven definition of food preference endotypes in UK Biobank volunteers is associated with distinctive health outcomes and blood based metabolomic and proteomic profiles
Source: Springer Nature journal article supplement (doi:10.1186/s12967-024-05663-0), 2024-10-01
Supplement: 12967_2024_5663_MOESM4_ESM.pdf [file 12967_2024_5663_MOESM4_ESM.pdf]

Supplementary information for

Artificial intelligence driven definition of food preference endotypes in UK Biobank volunteers is associated with distinctive health outcomes and blood based metabolomic and proteomic profiles

## INDEX

Supplementary Table 1. Study population characteristics of whole UK Biobank cohort and participants with FPQ

Supplementary Table 2: Exploratory Factor Analysis (EFA) results

Supplementary Table 3: Dimension of FPQ items based on Exploratory Factor Analysis

Supplementary Table 4: Actual daily nutrient intake for each food preference groups

Supplementary Table 5: Blood biochemistry and blood count for each food preference groups

Supplementary Table 6: pairwise group tests for metabolomics differential expression for Volcano3D plot

Supplementary Table 7: Limma differential expression for metabolomics data

Supplementary Table 8: Limma differential expression for proteomics data

Supplementary Table 9: Multinomial logistic regression for differentially expressed protein adjusted for age, sex and BMI

Supplementary Table 10: GO Term from Enrichment analysis of differentially expressed protein

Supplementary Table 11: Relative Risk of chronic diseases

Supplementary Data 1: UK Biobank Field ID

Supplementary Data 2: List of the 41 chronic conditions included in the definition of multimorbidity and its ICD10 code use for analysis.

## Supplementary Data 1: UK Biobank Field ID

| Field ID              | Description                                               |
|-----------------------|-----------------------------------------------------------|
| <a href="#">31</a>    | <a href="#">Sex</a>                                       |
| <a href="#">21003</a> | <a href="#">Age when attended assessment centre</a>       |
| <a href="#">21001</a> | <a href="#">Body mass index (BMI)</a>                     |
| <a href="#">23099</a> | <a href="#">Body fat percentage</a>                       |
| <a href="#">21002</a> | <a href="#">Weight</a>                                    |
| <a href="#">6138</a>  | <a href="#">Qualifications</a>                            |
| <a href="#">22189</a> | <a href="#">Townsend deprivation index at recruitment</a> |
| <a href="#">22032</a> | <a href="#">IPAQ activity group</a>                       |
| <a href="#">20116</a> | <a href="#">Smoking status</a>                            |
| <a href="#">20600</a> | <a href="#">Liking for adding salt to foods</a>           |
| <a href="#">20601</a> | <a href="#">Liking for aniseed</a>                        |
| <a href="#">20602</a> | <a href="#">Liking for apple juice</a>                    |
| <a href="#">20603</a> | <a href="#">Liking for apples</a>                         |
| <a href="#">20604</a> | <a href="#">Liking for asparagus</a>                      |
| <a href="#">20605</a> | <a href="#">Liking for aubergine</a>                      |
| <a href="#">20606</a> | <a href="#">Liking for avocados</a>                       |
| <a href="#">20607</a> | <a href="#">Liking for bacon</a>                          |
| <a href="#">20608</a> | <a href="#">Liking for baked/steamed fish</a>             |
| <a href="#">20609</a> | <a href="#">Liking for bananas</a>                        |
| <a href="#">20610</a> | <a href="#">Liking for barbequed or grilled meat</a>      |
| <a href="#">20611</a> | <a href="#">Liking for beef steak</a>                     |
| <a href="#">20612</a> | <a href="#">Liking for beetroot</a>                       |
| <a href="#">20613</a> | <a href="#">Liking for bell pepper</a>                    |
| <a href="#">20615</a> | <a href="#">Liking for biscuits</a>                       |
| <a href="#">20616</a> | <a href="#">Liking for bitter foods</a>                   |
| <a href="#">20617</a> | <a href="#">Liking for bitter/ale</a>                     |
| <a href="#">20618</a> | <a href="#">Liking for black olives</a>                   |
| <a href="#">20619</a> | <a href="#">Liking for black pepper</a>                   |
| <a href="#">20620</a> | <a href="#">Liking for blue cheese</a>                    |
| <a href="#">20621</a> | <a href="#">Liking for bolognese sauce</a>                |
| <a href="#">20622</a> | <a href="#">Liking for broad beans</a>                    |
| <a href="#">20623</a> | <a href="#">Liking for broccoli</a>                       |
| <a href="#">20624</a> | <a href="#">Liking for brown rice</a>                     |
| <a href="#">20625</a> | <a href="#">Liking for brussel sprouts</a>                |
| <a href="#">20626</a> | <a href="#">Liking for burgers (meat)</a>                 |
| <a href="#">20627</a> | <a href="#">Liking for burn of spicy foods</a>            |
| <a href="#">20628</a> | <a href="#">Liking for butter on bread</a>                |
| <a href="#">20629</a> | <a href="#">Liking for butternut squash</a>               |
| <a href="#">20630</a> | <a href="#">Liking for cabbage</a>                        |
| <a href="#">20631</a> | <a href="#">Liking for cake</a>                           |
| <a href="#">20632</a> | <a href="#">Liking for cake icing</a>                     |
| <a href="#">20633</a> | <a href="#">Liking for capers</a>                         |
| <a href="#">20634</a> | <a href="#">Liking for cauliflower</a>                    |
| <a href="#">20635</a> | <a href="#">Liking for cereal/granola bar</a>             |
| <a href="#">20636</a> | <a href="#">Liking for cheesecake</a>                     |

[20637 Liking for cherries](#)  
[20638 Liking for chicken](#)  
[20639 Liking for chilli pepper](#)  
[20640 Liking for chips/french fries](#)  
[20642 Liking for cod](#)  
[20643 Liking for coffee with sugar](#)  
[20644 Liking for coffee without sugar](#)  
[20645 Liking for coriander](#)  
[20646 Liking for corn flakes](#)  
[20647 Liking for cream](#)  
[20648 Liking for croissant](#)  
[20649 Liking for cucumber](#)  
[20650 Liking for curry](#)  
[20651 Liking for dairy products](#)  
[20652 Liking for dark chocolate](#)  
[20653 Liking for diet fizzy drinks](#)  
[20654 Liking for dried fruit](#)  
[20655 Liking for eggs](#)  
[20658 Liking for extra virgin olive oil](#)  
[20659 Liking for fatty foods](#)  
[20660 Liking for fresh tomatoes](#)  
[20661 Liking for fried chicken](#)  
[20662 Liking for fried/battered fish](#)  
[20663 Liking for fruit](#)  
[20664 Liking for garlic](#)  
[20665 Liking for gherkins](#)  
[20666 Liking for globe artichoke](#)  
[20667 Liking for goat's cheese](#)  
[20671 Liking for grapefruit](#)  
[20672 Liking for green olives](#)  
[20673 Liking for haddock](#)  
[20674 Liking for ham](#)  
[20675 Liking for hard cheese](#)  
[20676 Liking for herring](#)  
[20677 Liking for honey](#)  
[20678 Liking for horseradish/wasabi](#)  
[20679 Liking for ice cream](#)  
[20680 Liking for jam](#)  
[20681 Liking for kiwi fruit](#)  
[20682 Liking for lager](#)  
[20683 Liking for lamb](#)  
[20684 Liking for lemons](#)  
[20685 Liking for lentils/beans](#)  
[20686 Liking for liver](#)  
[20687 Liking for mackerel](#)  
[20688 Liking for marzipan](#)  
[20689 Liking for mayonnaise](#)  
[20690 Liking for melon](#)

[20691 Liking for milk chocolate](#)  
[20692 Liking for mushrooms](#)  
[20693 Liking for onions](#)  
[20694 Liking for orange juice](#)  
[20695 Liking for oranges](#)  
[20696 Liking for pasta](#)  
[20697 Liking for pears](#)  
[20698 Liking for pizza](#)  
[20699 Liking for plain yogurt](#)  
[20700 Liking for plums](#)  
[20701 Liking for pollock](#)  
[20702 Liking for pork chop](#)  
[20703 Liking for porridge](#)  
[20704 Liking for potato crisps](#)  
[20705 Liking for potatoes](#)  
[20706 Liking for prawns](#)  
[20707 Liking for raw carrots](#)  
[20708 Liking for red meat](#)  
[20709 Liking for red wine](#)  
[20710 Liking for regular \(non-diet\) fizzy drinks](#)  
[20711 Liking for roast chicken](#)  
[20712 Liking for salad dressing](#)  
[20713 Liking for salad leaves](#)  
[20714 Liking for salami](#)  
[20715 Liking for salmon](#)  
[20716 Liking for salty foods](#)  
[20717 Liking for salty pretzels](#)  
[20718 Liking for sardines](#)  
[20719 Liking for sausages \(meat\)](#)  
[20720 Liking for savoury biscuits](#)  
[20721 Liking for shellfish \(other than prawns\)](#)  
[20722 Liking for skimmed milk](#)  
[20723 Liking for smoked fish](#)  
[20724 Liking for soft cheese](#)  
[20725 Liking for soy sauce](#)  
[20726 Liking for soya milk](#)  
[20727 Liking for spicy foods](#)  
[20728 Liking for spinach](#)  
[20729 Liking for spirits](#)  
[20730 Liking for strawberries](#)  
[20731 Liking for sweet coffee house drinks](#)  
[20732 Liking for sweet foods](#)  
[20734 Liking for tea with sugar](#)  
[20735 Liking for tea without sugar](#)  
[20737 Liking for tinned tuna](#)  
[20736 Liking for tomato ketchup](#)  
[20738 Liking for turnip \(white\)](#)  
[20739 Liking for vegetables](#)

[20740](#) [Liking for vinegar](#)  
[20742](#) [Liking for whisky](#)  
[20743](#) [Liking for white bread](#)  
[20744](#) [Liking for white rice](#)  
[20745](#) [Liking for white wine](#)  
[20746](#) [Liking for whole grain breakfast cereal](#)  
[20747](#) [Liking for whole milk](#)  
[20748](#) [Liking for wholemeal bread](#)  
[26013](#) [Carbohydrate](#)  
[26002](#) [Energy](#)  
[26017](#) [Englyst fibre](#)  
[26008](#) [Fat](#)  
[26012](#) [Free sugar](#)  
[26005](#) [Protein](#)  
[26014](#) [Saturated fatty acids](#)  
[26011](#) [Total sugars](#)  
[30620](#) [Alanine aminotransferase](#)  
[30600](#) [Albumin](#)  
[30610](#) [Alkaline phosphatase](#)  
[30630](#) [Apolipoprotein A](#)  
[30640](#) [Apolipoprotein B](#)  
[30650](#) [Aspartate aminotransferase](#)  
[30710](#) [C-reactive protein](#)  
[30680](#) [Calcium](#)  
[30690](#) [Cholesterol](#)  
[30700](#) [Creatinine](#)  
[30720](#) [Cystatin C](#)  
[30660](#) [Direct bilirubin](#)  
[30730](#) [Gamma glutamyltransferase](#)  
[30740](#) [Glucose](#)  
[30750](#) [Glycated haemoglobin \(HbA1c\)](#)  
[30760](#) [HDL cholesterol](#)  
[30770](#) [IGF-1](#)  
[30780](#) [LDL direct](#)  
[30790](#) [Lipoprotein A](#)  
[30800](#) [Oestradiol](#)  
[30810](#) [Phosphate](#)  
[30820](#) [Rheumatoid factor](#)  
[30830](#) [SHBG](#)  
[30850](#) [Testosterone](#)  
[30840](#) [Total bilirubin](#)  
[30860](#) [Total protein](#)  
[30870](#) [Triglycerides](#)  
[30880](#) [Urate](#)  
[30670](#) [Urea](#)  
[30890](#) [Vitamin D](#)  
[23474](#) [3-Hydroxybutyrate](#)  
[23475](#) [Acetate](#)

[23476](#) [Acetoacetate](#)  
[23477](#) [Acetone](#)  
[23460](#) [Alanine](#)  
[23479](#) [Albumin](#)  
[23440](#) [Apolipoprotein A1](#)  
[23439](#) [Apolipoprotein B](#)  
[23484](#) [Cholesterol in Chylomicrons and Extremely Large VLDL](#)  
[23526](#) [Cholesterol in IDL](#)  
[23561](#) [Cholesterol in Large HDL](#)  
[23533](#) [Cholesterol in Large LDL](#)  
[23498](#) [Cholesterol in Large VLDL](#)  
[23568](#) [Cholesterol in Medium HDL](#)  
[23540](#) [Cholesterol in Medium LDL](#)  
[23505](#) [Cholesterol in Medium VLDL](#)  
[23575](#) [Cholesterol in Small HDL](#)  
[23547](#) [Cholesterol in Small LDL](#)  
[23512](#) [Cholesterol in Small VLDL](#)  
[23554](#) [Cholesterol in Very Large HDL](#)  
[23491](#) [Cholesterol in Very Large VLDL](#)  
[23519](#) [Cholesterol in Very Small VLDL](#)  
[23485](#) [Cholesteryl Esters in Chylomicrons and Extremely Large VLDL](#)  
[23418](#) [Cholesteryl Esters in HDL](#)  
[23527](#) [Cholesteryl Esters in IDL](#)  
[23417](#) [Cholesteryl Esters in LDL](#)  
[23562](#) [Cholesteryl Esters in Large HDL](#)  
[23534](#) [Cholesteryl Esters in Large LDL](#)  
[23499](#) [Cholesteryl Esters in Large VLDL](#)  
[23569](#) [Cholesteryl Esters in Medium HDL](#)  
[23541](#) [Cholesteryl Esters in Medium LDL](#)  
[23506](#) [Cholesteryl Esters in Medium VLDL](#)  
[23576](#) [Cholesteryl Esters in Small HDL](#)  
[23548](#) [Cholesteryl Esters in Small LDL](#)  
[23513](#) [Cholesteryl Esters in Small VLDL](#)  
[23416](#) [Cholesteryl Esters in VLDL](#)  
[23555](#) [Cholesteryl Esters in Very Large HDL](#)  
[23492](#) [Cholesteryl Esters in Very Large VLDL](#)  
[23520](#) [Cholesteryl Esters in Very Small VLDL](#)  
[23473](#) [Citrate](#)  
[23404](#) [Clinical LDL Cholesterol](#)  
[23481](#) [Concentration of Chylomicrons and Extremely Large VLDL Particles](#)  
[23430](#) [Concentration of HDL Particles](#)  
[23523](#) [Concentration of IDL Particles](#)  
[23429](#) [Concentration of LDL Particles](#)  
[23558](#) [Concentration of Large HDL Particles](#)  
[23530](#) [Concentration of Large LDL Particles](#)  
[23495](#) [Concentration of Large VLDL Particles](#)  
[23565](#) [Concentration of Medium HDL Particles](#)  
[23537](#) [Concentration of Medium LDL Particles](#)

[23502](#) [Concentration of Medium VLDL Particles](#)  
[23572](#) [Concentration of Small HDL Particles](#)  
[23544](#) [Concentration of Small LDL Particles](#)  
[23509](#) [Concentration of Small VLDL Particles](#)  
[23428](#) [Concentration of VLDL Particles](#)  
[23551](#) [Concentration of Very Large HDL Particles](#)  
[23488](#) [Concentration of Very Large VLDL Particles](#)  
[23516](#) [Concentration of Very Small VLDL Particles](#)  
[23478](#) [Creatinine](#)  
[23443](#) [Degree of Unsaturation](#)  
[23450](#) [Docosahexaenoic Acid](#)  
[23486](#) [Free Cholesterol in Chylomicrons and Extremely Large VLDL](#)  
[23422](#) [Free Cholesterol in HDL](#)  
[23528](#) [Free Cholesterol in IDL](#)  
[23421](#) [Free Cholesterol in LDL](#)  
[23563](#) [Free Cholesterol in Large HDL](#)  
[23535](#) [Free Cholesterol in Large LDL](#)  
[23500](#) [Free Cholesterol in Large VLDL](#)  
[23570](#) [Free Cholesterol in Medium HDL](#)  
[23542](#) [Free Cholesterol in Medium LDL](#)  
[23507](#) [Free Cholesterol in Medium VLDL](#)  
[23577](#) [Free Cholesterol in Small HDL](#)  
[23549](#) [Free Cholesterol in Small LDL](#)  
[23514](#) [Free Cholesterol in Small VLDL](#)  
[23420](#) [Free Cholesterol in VLDL](#)  
[23556](#) [Free Cholesterol in Very Large HDL](#)  
[23493](#) [Free Cholesterol in Very Large VLDL](#)  
[23521](#) [Free Cholesterol in Very Small VLDL](#)  
[23470](#) [Glucose](#)  
[20280](#) [Glucose-lactate](#)  
[23461](#) [Glutamine](#)  
[23462](#) [Glycine](#)  
[23480](#) [Glycoprotein Acetyls](#)  
[23406](#) [HDL Cholesterol](#)  
[23463](#) [Histidine](#)  
[23465](#) [Isoleucine](#)  
[23405](#) [LDL Cholesterol](#)  
[23471](#) [Lactate](#)  
[23466](#) [Leucine](#)  
[23449](#) [Linoleic Acid](#)  
[23447](#) [Monounsaturated Fatty Acids](#)  
[23444](#) [Omega-3 Fatty Acids](#)  
[23445](#) [Omega-6 Fatty Acids](#)  
[23468](#) [Phenylalanine](#)  
[23437](#) [Phosphatidylcholines](#)  
[23434](#) [Phosphoglycerides](#)  
[23483](#) [Phospholipids in Chylomicrons and Extremely Large VLDL](#)  
[23414](#) [Phospholipids in HDL](#)

[23525](#) [Phospholipids in IDL](#)  
[23413](#) [Phospholipids in LDL](#)  
[23560](#) [Phospholipids in Large HDL](#)  
[23532](#) [Phospholipids in Large LDL](#)  
[23497](#) [Phospholipids in Large VLDL](#)  
[23567](#) [Phospholipids in Medium HDL](#)  
[23539](#) [Phospholipids in Medium LDL](#)  
[23504](#) [Phospholipids in Medium VLDL](#)  
[23574](#) [Phospholipids in Small HDL](#)  
[23546](#) [Phospholipids in Small LDL](#)  
[23511](#) [Phospholipids in Small VLDL](#)  
[23412](#) [Phospholipids in VLDL](#)  
[23553](#) [Phospholipids in Very Large HDL](#)  
[23490](#) [Phospholipids in Very Large VLDL](#)  
[23518](#) [Phospholipids in Very Small VLDL](#)  
[23446](#) [Polyunsaturated Fatty Acids](#)  
[23472](#) [Pyruvate](#)  
[23402](#) [Remnant Cholesterol \(Non-HDL, Non-LDL -Cholesterol\)](#)  
[23448](#) [Saturated Fatty Acids](#)  
[20281](#) [Spectrometer-corrected alanine](#)  
[23438](#) [Sphingomyelins](#)  
[23400](#) [Total Cholesterol](#)  
[23401](#) [Total Cholesterol Minus HDL-C](#)  
[23436](#) [Total Cholines](#)  
[23464](#) [Total Concentration of Branched-Chain Amino Acids \(Leucine + Isoleucine + Valine\)](#)  
  
[23427](#) [Total Concentration of Lipoprotein Particles](#)  
[23415](#) [Total Esterified Cholesterol](#)  
[23442](#) [Total Fatty Acids](#)  
[23419](#) [Total Free Cholesterol](#)  
[23482](#) [Total Lipids in Chylomicrons and Extremely Large VLDL](#)  
[23426](#) [Total Lipids in HDL](#)  
[23524](#) [Total Lipids in IDL](#)  
[23425](#) [Total Lipids in LDL](#)  
[23559](#) [Total Lipids in Large HDL](#)  
[23531](#) [Total Lipids in Large LDL](#)  
[23496](#) [Total Lipids in Large VLDL](#)  
[23423](#) [Total Lipids in Lipoprotein Particles](#)  
[23566](#) [Total Lipids in Medium HDL](#)  
[23538](#) [Total Lipids in Medium LDL](#)  
[23503](#) [Total Lipids in Medium VLDL](#)  
[23573](#) [Total Lipids in Small HDL](#)  
[23545](#) [Total Lipids in Small LDL](#)  
[23510](#) [Total Lipids in Small VLDL](#)  
[23424](#) [Total Lipids in VLDL](#)  
[23552](#) [Total Lipids in Very Large HDL](#)  
[23489](#) [Total Lipids in Very Large VLDL](#)  
[23517](#) [Total Lipids in Very Small VLDL](#)



|                       |                                                                        |
|-----------------------|------------------------------------------------------------------------|
| <a href="#">23411</a> | <a href="#">Total Phospholipids in Lipoprotein Particles</a>           |
| <a href="#">23407</a> | <a href="#">Total Triglycerides</a>                                    |
| <a href="#">23487</a> | <a href="#">Triglycerides in Chylomicrons and Extremely Large VLDL</a> |
| <a href="#">23410</a> | <a href="#">Triglycerides in HDL</a>                                   |
| <a href="#">23529</a> | <a href="#">Triglycerides in IDL</a>                                   |
| <a href="#">23409</a> | <a href="#">Triglycerides in LDL</a>                                   |
| <a href="#">23564</a> | <a href="#">Triglycerides in Large HDL</a>                             |
| <a href="#">23536</a> | <a href="#">Triglycerides in Large LDL</a>                             |
| <a href="#">23501</a> | <a href="#">Triglycerides in Large VLDL</a>                            |
| <a href="#">23571</a> | <a href="#">Triglycerides in Medium HDL</a>                            |
| <a href="#">23543</a> | <a href="#">Triglycerides in Medium LDL</a>                            |
| <a href="#">23508</a> | <a href="#">Triglycerides in Medium VLDL</a>                           |
| <a href="#">23578</a> | <a href="#">Triglycerides in Small HDL</a>                             |
| <a href="#">23550</a> | <a href="#">Triglycerides in Small LDL</a>                             |
| <a href="#">23515</a> | <a href="#">Triglycerides in Small VLDL</a>                            |
| <a href="#">23408</a> | <a href="#">Triglycerides in VLDL</a>                                  |
| <a href="#">23557</a> | <a href="#">Triglycerides in Very Large HDL</a>                        |
| <a href="#">23494</a> | <a href="#">Triglycerides in Very Large VLDL</a>                       |
| <a href="#">23522</a> | <a href="#">Triglycerides in Very Small VLDL</a>                       |
| <a href="#">23469</a> | <a href="#">Tyrosine</a>                                               |
| <a href="#">23403</a> | <a href="#">VLDL Cholesterol</a>                                       |
| <a href="#">23467</a> | <a href="#">Valine</a>                                                 |
| <a href="#">1072</a>  | <a href="#">olink_data</a>                                             |
| <a href="#">41270</a> | <a href="#">Diagnoses - ICD10</a>                                      |

Supplementary Data 2: List of the 41 chronic conditions included in the definition of multimorbidity and its ICD10 code use for analysis.

| No | Chronic condition                     | ICD10 code |
|----|---------------------------------------|------------|
| 1  | Anaemia                               | D5[0-3]    |
| 2  | Angina pectoris                       | I20        |
| 3  | Anxiety                               | F41        |
| 4  | Asthma                                | J45        |
| 5  | Atrial fibrillation                   | I48        |
| 6  | Bronchiectasis                        | J47        |
| 7  | Cancer                                | C[0-9]     |
| 8  | Chronic kidney disease                | N18        |
| 9  | Chronic obstructive pulmonary disease | J44        |
| 10 | Chronic sinusitis                     | J32        |
| 11 | Cirrhosis                             | K74        |
| 12 | Dementia                              | F0[1-3]    |
| 13 | Depression                            | F3[2-3]    |
| 14 | Dermatitis                            | L[2-3]     |
| 15 | Diabetes                              | E1[0-4]    |
| 16 | Epilepsy                              | G4[0-1]    |
| 17 | Glaucoma                              | H4[0-2]    |
| 18 | Heart failure                         | I50        |
| 19 | Hepatitis                             | B1[5-9]    |
| 20 | Hypertention                          | I1[0-5]    |
| 21 | Inflammatory bowel disease            | K5[0-2]    |
| 22 | Irritable bowel syndrome              | K58        |
| 23 | Meningitis                            | G0[0-3]    |
| 24 | Migraine                              | G43        |
| 25 | Multiple sclerosis                    | G35        |
| 26 | Myocardial infarction                 | I2[1-2]    |
| 27 | Osteoporosis                          | M8[0-2]    |
| 28 | Parkinson's disease                   | G2[0-1]    |
| 29 | Peripheral vascular diseases          | I73        |
| 30 | Prostate problem                      | N4[0-2]    |
| 31 | Rheumatoid arthritis                  | M0[5-6]    |
| 32 | Schizophrenia                         | F2[0-9]    |
| 33 | Stroke                                | I6[0-9]    |
| 34 | Thyroid problem                       | E0[0-7]    |
| 35 | Tuberculosis                          | A1[5-9]    |
| 36 | Vestibular disorder                   | H8[1-3]    |
| 37 | Constipation                          | K59        |
| 38 | Dyspepsia                             | K3[0-1]    |
| 39 | Diverticular disease of intestine     | K5[7-8]    |
| 40 | Endometriosis                         | N80        |
| 41 | Hearing loss                          | H9[0-1]    |
